# Supplementary material
Source: PubMed Central journal article supplement (PMC4215941)
Supplement: NIHMS637194-supplement-Supplemental_Material.pdf [file NIHMS637194-supplement-Supplemental_Material.pdf]

## Field et al. Supplemental Information

|                                                                                                                                                                                                                                                      |             |
|------------------------------------------------------------------------------------------------------------------------------------------------------------------------------------------------------------------------------------------------------|-------------|
| Supp. File 1 – Fasta file of the miRNAs discovered in the turtle <i>C. picta</i> .                                                                                                                                                                   | Pp. 2-33    |
| Supp. File 2 – Fasta file of the miRNAs discovered in the alligator <i>A. mississippiensis</i>                                                                                                                                                       | Pp. 34-60   |
| Supp. File 3 - Fasta file of the miRNAs discovered in the pigeon <i>C. livia</i>                                                                                                                                                                     | Pp. 61-90   |
| Supp. File 4 - Fasta file of the miRNAs discovered in the python <i>P. bivittatus</i>                                                                                                                                                                | Pp. 91-114  |
| Supp. File 5 – Nexus file of the miRNAs used to generate Figure 1                                                                                                                                                                                    | Pp. 115     |
| Supp. File 6 – Age constrains for nodes in the Bayesian analysis for Figure 1                                                                                                                                                                        | Pp. 116     |
| Supp. File 7 – Nexus file of the 238 pre-miRNA sequences from 17 tetrapod tax                                                                                                                                                                        | Pp. 117-237 |
| Supp. File 8 – Table of miRNA paralogues                                                                                                                                                                                                             | Pp. 238-250 |
| Supp. File 9 – Nexus file of the 238 miRNA genes in the 17 taxa                                                                                                                                                                                      | Pp. 251-256 |
| Supp. File 10 – Alignment of miR-1720                                                                                                                                                                                                                | Pp. 257     |
| Supp. File 11 – Alignment of miR-1791                                                                                                                                                                                                                | Pp. 258     |
| Supp. File 12 – Alignment of miR-2984                                                                                                                                                                                                                | Pp. 259     |
| Supp. File 13 – Fasta file of the newly discovered miRNAs in the chicken <i>G. gallus</i>                                                                                                                                                            | Pp. 260-261 |
| Supp. File 13 – Fasta file of the newly discovered miRNAs in the lizard <i>A. carolinensis</i>                                                                                                                                                       | Pp. 262-264 |
| Supp. File 14 – Fasta file of the newly discovered miRNAs in the from <i>X. tropicalis</i>                                                                                                                                                           | Pp. 265     |
| Supp. File 15 – Ratogram of the 238 premiRNA sequences in the 17 tetrapod taxa.<br>Note that the turtles have relatively slow rates of miRNA sequence evolution as compared to other tetrapod taxa.                                                  | Pp. 266     |
| Supp. File 16 – Taxonomic placement of miRNA losses in the 11 representative tetrapod taxa. Note that the turtle node is the only node that is not accompanied by a loss of at least one of the 238 original miRNA loci present in the tetrapod LCA. | Pp. 267     |

---

>Chrysemys-let-7a-1\_pre  
CCTGCACTGTGGGATGAGGTAGTGGTTGTATAGTTTTAGGGTCATACCCACAACCTGGGAGATAACTATAACAATCTACTGTCTTTCTTAAAGCAGC

>Chrysemys-let-7a-1-5p  
TGAGGTAGTGGTTGTATAGTT

>Chrysemys-let-7a-1-3p  
CTATAACAATCTACTGTCTTT

>Chrysemys-let-7a-2\_pre  
GCATGCATCCAGGTTGAGGTAGTGGTTGTATAGTTTTAGAAATTACACCAAGGGAGATAACTGTACAACCTCCTAGCTTTCTTGGGTCTTGCACAA

>Chrysemys-let-7a-2-5p  
TGAGGTAGTGGTTGTATAGTT

>Chrysemys-let-7a-2-3p  
CTGTACAACCTCCTAGCTTTCC

>Chrysemys-let-7a-3\_pre  
GTCCTTTGGGGTGAGGTAGTGGTTGTATAGTTTTAGGGTTATAACCTGCCTGTCAGATAACTATAACAATCTACTGTCTTTCTTGAAGTGGCT

>Chrysemys-let-7a-3-5p  
TGAGGTAGTGGTTGTATAGTT

>Chrysemys-let-7a-3-3p  
CTATAACAATCTACTGTCTTT

>Chrysemys-let-7a-4\_pre  
TGGAGGTGAGGTAGTGGTTGTATAGTTTTGGTGGGAGGGATTTTCATCCCATTTTCAGGTGATAACTATAACAGTCTATTGCCTTCTTAAAG

>Chrysemys-let-7a-4-5p  
TGAGGTAGTGGTTGTATAGTT

>Chrysemys-let-7a-4-3p  
CTATAACAGTCTATTGCCTTCC

>Chrysemys-let-7b\_pre  
GCTCTAGCAGGGTGAGGTAGTGGTTGTGTGGTTTTAGGGTAGTGATTTTTGCCCAATCAGGAGATAACTATAACAACCTACTGCCTTCCCTG

>Chrysemys-let-7b-5p (predicted)  
TGAGGTAGTGGTTGTGTGGTT

>Chrysemys-let-7c-1\_pre  
GTGTGCATCCGGGTTGAGGTAGTGGTTGTATGGTTTTAGAGTTACACCCTGGGAGTTAACTGTACAACCTTCTAGCTTTCTTGGAGCACACTTGG

>Chrysemys-let-7c-1-5p  
TGAGGTAGTGGTTGTATGGTT

>Chrysemys-let-7c-1-3p  
CTGTACAACCTTCTAGCTTTCC

>Chrysemys-let-7c-2\_pre  
TGCGTGCCCCAGGCTGAGGTAGTGGTTGTATGGTTTTAGAAATAACACCCGAGGAGATAACTGTACAGCCTCCTAGCTTTCCCTGGGGCGCTGCTT

>Chrysemys-let-7c-2-5p  
TGAGGTAGTGGTTGTATGGTT

>Chrysemys-let-7c-2-3p  
CTGTACAGCCTCCTAGCTTTCC

>Chrysemys-let-7d\_pre  
TAGGAAGAGGTAGTGGTTGCATAGTTTTAGGGCAGAGATTTTGTCTACAAGGAGTTAACTATAACAACCTGCTGCCTTTCTTAGGGCT

>Chrysemys-let-7d-5p  
AGAGGTAGTGGTTGCATAGTT

>Chrysemys-let-7d-3p  
CTATAACAACCTGCTGCCTTTCT

>Chrysemys-let-7e\_pre  
GTCCTTGAGGCTGAGGTAGTAGATTGAATAGTTGTGGAGTCCCTACCCTCCCTTTGAGCTAACTATAACAATCTACTGTCTTTCTTAAAGGAGA

---

>Chrysemys-let-7e-5p  
TGAGGTAGTAGATTGAATAGTT

>Chrysemys-let-7e-3p  
CTATACAATCTACTGTCTTT

>Chrysemys-let-7f-1\_pre  
CCGAGGCCCTGGGGGATGAGGTAGTAGATTGTATAGTTTTAGGGTACACCCGGTCTCGGAGATAACTATACAGTCTACTGTCTTTCCCG

>Chrysemys-let-7f-1-5p  
TGAGGTAGTAGATTGTATAGTT

>Chrysemys-let-7f-2\_pre  
GCGGAGTGAGGTAGTAGATTGTATAGTTGTAGGGTAGTTATTTTTACCCTGTTTCAGGAGATAACTATACAATCTATTGCCTTCCCCGAG

>Chrysemys-let-7f-2-5p  
TGAGGTAGTAGATTGTATAGTT

>Chrysemys-let-7f-2-3p  
CTATACAATCTATTGCCTTCC

>Chrysemys-let-7g\_pre  
TCCAGGCTGAGGTAGTAGTTTTGTACAGTTTTGAGGGTCTATGATACCACCCGGTACAGGAGATAACTGTACAGGCCACTGCCTTGCCTGGGA

>Chrysemys-let-7g-5p  
TGAGGTAGTAGTTTTGTACAGTT

>Chrysemys-let-7g-3p  
CTGTACAGGCCACTGCCTTGC

>Chrysemys-let-7i\_pre  
CCCTGGCTGAGGTAGTAGTTTTGTGCTGTTGGTCGGGTTGTGACATTGCCCGCTGTGGAGATAACTGCGCAAGCTACTGCCTTGCTAGTGCTG

>Chrysemys-let-7i-5p  
TGAGGTAGTAGTTTTGTGCTGTT

>Chrysemys-let-7i-3p  
CTGCGCAAGCTACTGCCTTGCT

>Chrysemys-mir-1a-1\_pre  
CTACCTGCTTGAGAGACATACTTCTTTTATATGCCCATATGAACCTGGCAAGCTATGGAATGTAAAGAAGTATGTATTTTCAGGTGGGGATCATT

>Chrysemys-mir-1a-1-3p  
TGGAATGTAAAGAAGTATGTAT

>Chrysemys-mir-1a-1-5p  
ACATACTTCTTTATATGCCCATA

>Chrysemys-mir-1a-2\_pre  
TCCTGCCCAGAGTACATACTTCTTTTATGTACCCATATGAACATATAATGCTATGGAATGTAAAGAAGTATGTATTTTTGGCAGGCACTG

>Chrysemys-mir-1a-2-3p  
TGGAATGTAAAGAAGTATGTAT

>Chrysemys-mir-1a-2-5p  
ACATACTTCTTTATGTACCCATA

>Chrysemys-mir-1b\_pre  
AGCCCCCTCCCTCCCAACCCTACATACTTCTTTCATATGCCCATAGGGAGTCAGCCGGCGTTATGGAATGTTAAGAAGTATGTATCCTTGGGCTGGGG

>Chrysemys-mir-1b-3p  
TGGAATGTTAAGAAGTATGTAT

>Chrysemys-mir-1b-5p  
CATACTTCTTTCATATGCCCATA

>Chrysemys-mir-7a-1\_pre  
GGATGTTGGTCTAGTTCTGTGTGGAAGACTAGTGATTTTTGTTGTTTTTAGATAACTAAATCGACAACAAATCGCAGTCTGCCATATGGCACAGGCC

>Chrysemys-mir-7a-1-5p  
TGGAAGACTAGTGATTTTTGTT

>Chrysemys-mir-7a-1-3p

CAACAAATCGCAGTCTGCCATA

>Chrysemys-mir-7a-2\_pre

TGGCCCCGTCCCTTATGGAAGACTAGTGATTTTGTGTTCTATAGCTCATCTCATGACAACAAGTCACAGTCTGCCTTATGGTGCATGGCCTCCT

>Chrysemys-mir-7a-2-5p

TGGAAGACTAGTGATTTTGTGTT

>Chrysemys-mir-7a-2-3p

CAACAAGTCACAGTCTGCCTT

>Chrysemys-mir-7a-3\_pre

ATGGTCTGGCTCTGTGTGGAAGACTAGTGATTTTGTGTTCTGACTTATAAAAAGTGACAACAAATCATAGCCTGCCATACAGCACGGACCACAGCC

>Chrysemys-mir-7a-3-5p

TGGAAGACTAGTGATTTTGTGTT

>Chrysemys-mir-7a-3-3p

CAACAAATCATAGCCTGCCATA

>Chrysemys-mir-7b\_pre

TTCTGGGTCGGTCTGGAAGACTTGTGATTTTGTGTTTCCAGTGTGAGGGAAGCGAACAACAAATCCCAGTCTCCTCACAGCCCCAGGACTG

>Chrysemys-mir-7b-5p

TGGAAGACTTGTGATTTTGTGTTGT

>Chrysemys-mir-9-1\_pre

ACTTCAGGGGTTGGTTGTTATCTTTGGTTATCTAGCTGTATGAGTGGTGTCAATTCTTTCATAAAGCTAGATAACCGAAAGTAAAAATAACCCCATTT

>Chrysemys-mir-9-1-5p

TCTTTGGTTATCTAGCTGTATGA

>Chrysemys-mir-9-1-3p

TAAAGCTAGATAACCGAAAGTA

>Chrysemys-mir-9-2\_pre

CTGTGAGGAAGCGAGTTGTTATCTTTGGTTATCTAGCTGTATGAGTGTGTTGGTCTTTCATAAAGCTAGATAACCGAAAGTAAAAACTCCTTCATGA

>Chrysemys-mir-9-2-5p

TCTTTGGTTATCTAGCTGTATGA

>Chrysemys-mir-9-2-3p

TAAAGCTAGATAACCGAAAGTA

>Chrysemys-mir-9-3\_pre

AGAAGGAGGGCTGTTTCTGTCTTTGGTTATCTAGCTGTATGAGTGTATTAAGCCATCATAAAGCTAGATAACCGAAAGTAGAAATGACTTCCAAC

>Chrysemys-mir-9-3-5p

TCTTTGGTTATCTAGCTGTATGA

>Chrysemys-mir-9-3-3p

TAAAGCTAGATAACCGAAAGTA

>Chrysemys-mir-9-4\_pre

GACTGGGTTGGTTTTTGTCTTTGGTTATCTAGCTGTATGAGTGTATGTGATATCATAAAGCTAGAGAACCGAATGTAAAAACTGATTCACTATTCT

>Chrysemys-mir-9-4-5p

TCTTTGGTTATCTAGCTGTATGA

>Chrysemys-mir-9-4-3p

TAAAGCTAGAGAACCGAATGTA

>Chrysemys-mir-10a\_pre

ATGCATCTGTCTTCTATATGTACCCTGTAGATCCGAATTTGTGTAAAGGAAATTTGTGTCACAAATTCGTATCTAGGGGAATATGTAGTTGACACAA

>Chrysemys-mir-10a-5p

TACCCTGTAGATCCGAATTTGT

>Chrysemys-mir-10a-3p

TCACAAATTCGTATCTAGGGG

>Chrysemys-mir-10b\_pre

---

TATTACGTTGTCTATATATACCTGTAGAACCGAATTTGTGTGGTATTACATAGTCACAGATTTCGATTCTAGGGGAATATATGGTCGATGCAAAA  
>Chrysemys-mir-10b-5p  
TACCCTGTAGAACCGAATTTGT  
>Chrysemys-mir-10b-3p  
AGATTTCGATTCTAGGGGAAT

>Chrysemys-mir-10c\_pre  
ATACAGTCGTCTATATGTACCCTGTAGAATCGAATTTGTGTGAATATTTGAGAGTCACAAATTCGTCTCTAGGGGAGTATATGGACGATGCCAGAG  
>Chrysemys-mir-10c-5p  
ACCCTGTAGAATCGAATTTGTG  
>Chrysemys-mir-10c-3p  
CAAATTCGTCTCTAGGGGAGT

>Chrysemys-mir-15a\_pre  
CCTTGGGCTAACGTAGCAGCACATAATGGTTTTGTGGGTTTTGAAAAGGTGCAGGCCATATTGTGCTGCCTCAAAAATACAAGG  
>Chrysemys-mir-15a-5p  
TAGCAGCACATAATGGTTTTG

>Chrysemys-mir-15b-1\_pre  
ACCTTAAATTA CTCTAGCAGCACATCATGGTTTTGCATGATCTTGTAAAGATGCTAATCATTATTTGCTGCTTTAGGAATTTAAGGA  
>Chrysemys-mir-15b-1-5p  
TAGCAGCACATCATGGTTTTG  
>Chrysemys-mir-15b-1-3p  
TAATCATTATTTGCTGCTTT

>Chrysemys-mir-15b-2\_pre  
GGGCTTTGAGGAGATGTAGCAGCACATCATGGTTTTGTAGGGACAAGGAGATACAGACCATTCTGGGCTGCCTCATTACCTCAAGGATAA  
>Chrysemys-mir-15b-2-5p  
TAGCAGCACATCATGGTTTTGTAG  
>Chrysemys-mir-15b-2-3p  
CAGACCATTCTGGGCTGCCTCATT

>Chrysemys-mir-16a\_pre  
CAGCAGTACATTAGCAGCACGTAAATATTGGCGTTAACTCTGTAAATATCTCCAGTATTA ACTGTGCTGCTGAAGTAAAGT  
>Chrysemys-mir-16a-5p  
TAGCAGCACGTAAATATTGGCG  
>Chrysemys-mir-16a-3p  
CCAGTATTA ACTGTGCTGCTGA

>Chrysemys-mir-16b\_pre  
TATACTTGTTC CGCCTAGCAGCACGTAAATATTGGTGTATAAAAAGTAAATCAAACCCCAATATTATTGTGCTGCTTAAGCGTGGCAGA  
>Chrysemys-mir-16b-5p  
TAGCAGCACGTAAATATTGGTG  
>Chrysemys-mir-16b-3p  
CCAATATTATTGTGCTGCTTAA

>Chrysemys-mir-16c\_pre  
TCAGCAGTGCTCTAGCAGCACGTAAATACTGGAGTCGAGGACTGCCTGGCTGCTCTCCAGTATTGCATTGCTGCTTGAGTGAGGCTGG  
>Chrysemys-mir-16c-5p  
TAGCAGCACGTAAATACTGGAGT  
>Chrysemys-mir-16c-3p  
TCTCCAGTATTGCATTGCTGCT

>Chrysemys-mir-17\_pre  
CGTCAGAGTAATGTCAAAGTGCTTACAGTGCAGGTAGTGATATATAGAACC TACTGCAGTGAAGGCAC TTGTAGCATTTATAGTGACAA  
>Chrysemys-mir-17-5p  
CAAAGTGCTTACAGTGCAGGT

---

>Chrysemys-mir-17-3p  
CTGCAGTGAAGGCACTTGTAGC

>Chrysemys-mir-18a\_pre  
TGCTTTTTGTTCTAAGGTGCATCTAGTGCAGATAGTGAAGTAGATTAGCATCTACTGCCCTAAGTGCTCCTTCTGGCATAAGAAGTTAT

>Chrysemys-mir-18a-5p  
TAAGGTGCATCTAGTGCAGA

>Chrysemys-mir-18a-3p  
ACTGCCCTAAGTGCTCCTTCTG

>Chrysemys-mir-18b\_pre  
GTTCTTGTGTTAAGGTGCATCTAGTGCAGTTAGTGAAGTAGCTTAGAATCTACTGCCCTAAATGCTCCTTCTGGCA

>Chrysemys-mir-18b-5p  
TAAGGTGCATCTAGTGCAGTTA

>Chrysemys-mir-18b-3p  
ACTGCCCTAAATGCTCCTTCTGG

>Chrysemys-mir-19a\_pre  
TAGCTGCTCTGCAGTCTCTGTTAGTTTTGCATAGTTGCACTACAAGAAGAATGTAGTTGTGCAAATCTATGCAAAACTGATGGTGGCCTGTTATT

>Chrysemys-mir-19a-5p  
AGTTTTGCATAGTTGCACTACA

>Chrysemys-mir-19a-3p  
TGTGCAAATCTATGCAAAACTG

>Chrysemys-mir-19b-1\_pre  
GAACACTGTTCTCTGGTTAGTTTTGCAGGTTTGCATCCAGCTGTATGATACTCTGCTGTGCAAATCCATGCAAAACTGACTGTGGCAGTGACAA

>Chrysemys-mir-19b-1-3p  
TGTGCAAATCCATGCAAAACTG

>Chrysemys-mir-19b-1-5p  
AGTTTTGCAGGTTTGCATCC

>Chrysemys-mir-19b-2\_pre  
AAGATAGTGCTGACTACAGTCAGTTTTGCAGGATTGCATTCCAGCTTATTTCAAACGCTGTGCAAATCCATGCAAAACTGACTGTGGTTGCATTCA

>Chrysemys-mir-19b-2-3p  
TGTGCAAATCCATGCAAAACTG

>Chrysemys-mir-19b-2-5p  
AGTTTTGCAGGATTGCATTCC

>Chrysemys-mir-20a\_pre  
GACAGCTCCTGTAGTACTAAAGTGCTTATAGTGCAGGTAGTGTTCAGTAATCTACTGCATTATGAGCACTTAAAGTACTGCTAGCTGTAGAA

>Chrysemys-mir-20a-5p  
TAAAGTGCTTATAGTGCAGGTA

>Chrysemys-mir-20a-3p  
ACTGCATTATGAGCACTTAAAG

>Chrysemys-mir-20b\_pre  
TTTTGTCTTAGCAGTATCAAAGTGCTCATAGTGCAGGTAGTTTTTGAATTGGATCTACTGTAATGTGGGCACTTATAGTACTGCCAGATAAAAATG

>Chrysemys-mir-20b-5p  
CAAAGTGCTCATAGTGCAGGTA

>Chrysemys-mir-20b-3p  
ACTGTAATGTGGGCACTTATAGT

>Chrysemys-mir-21\_pre  
CTGTACCATCCTGTTCGGATAGCTTATCAGACTGATGTTGACTGTTGGATCTCATGGCAACAACAGTCGGTAGGCTGTCTGACATTTTGGTATCTTT

>Chrysemys-mir-21-5p  
TAGCTTATCAGACTGATGTTGA

>Chrysemys-mir-21-3p

AACAACAGTCGGTAGGCTGTCT

>Chrysemys-mir-22\_pre  
CCGGCTAACTAGCACCAGTTCTTCAGTGGCAAGCTTTACGTCCCTGTCTAGCAGCTAAAGCTGCCAGTTGAAGAAGTGTGAATGTAGCCACTCT  
>Chrysemys-mir-22-5p  
AGTTCTTCAGTGGCAAGCTTTA  
>Chrysemys-mir-22-3p  
AAGCTGCCAGTTGAAGAAGTGT

>Chrysemys-mir-23a\_pre  
CCTGCCCTGCCAGCTGGGGTTCTGGTGATGCGATTTTTATCCTACCACCCAAAATCACATTGCCAGGGATTTCCAACGGGCGGGGCCA  
>Chrysemys-mir-23a-3p  
ATCACATTGCCAGGGATTTCC

>Chrysemys-mir-23b\_pre  
TAATGTTGTGGCTGTTTGGGTTCTGGCATGCTGATTTGTGATTTAAGATTTAAAATCACATTGCCAGGGATTTACCACATAACCATGACTGT  
>Chrysemys-mir-23b-3p  
ATCACATTGCCAGGGATTTACC

>Chrysemys-mir-24-1\_pre  
GTTGATGGACCCGTCCTCCGGTGCCTACTGAGCTGATATCAGTTCTGATTTTACATACTGGCTCAGTTTCAGCAGGAACAGGAGTCGAGCCCTAAA  
>Chrysemys-mir-24-1-3p  
TGGCTCAGTTTCAGCAGGAACA  
>Chrysemys-mir-24-1-5p  
TGCCTACTGAGCTGATATCAGT

>Chrysemys-mir-24-2\_pre  
CTCCCGGGCTCTGCCTCCCGTGCCTACTGAGCTGATACTCAGTCGCTTTGCTTAAACTGGCTCAGTTTCAGCAGGAACAGGAGTCGGGCTCCAGCC  
>Chrysemys-mir-24-2-3p  
TGGCTCAGTTTCAGCAGGAACA  
>Chrysemys-mir-24-2-5p  
TGCCTACTGAGCTGATACTCAGT

>Chrysemys-mir-26-1\_pre  
AGGTTGTGACCTGGTTCAAGTAATCCAGGATAGGCTGTGTGCAATCTAATTGGCCTATTCTTGATTACTTGCCTGGGAGGCAACCACGA  
>Chrysemys-mir-26-1-5p  
TTCAAGTAATCCAGGATAGGCT  
>Chrysemys-mir-26-1-3p  
CCTATTCTTGATTACTTGCCT

>Chrysemys-mir-26-2\_pre  
TGCGGAGGCCGTAGCCCGGTTCAAGTAATCCAGGATAGGCTGTTACCAGGCAGCACGGCCTATTCTTGATTACTTGTTCAGGAGGCGGCTGCTGG  
>Chrysemys-mir-26-2-5p  
TTCAAGTAATCCAGGATAGGCT  
>Chrysemys-mir-26-2-3p  
CCTATTCTTGATTACTTGTTC

>Chrysemys-mir-26-3\_pre  
CGGAGGCCGGCGCCGGGTTCAAGTAATCCAGGATAGGCTGTGGTCTGCGCAGTCGGCCTGTTCTCGATTACTTGGCGCCGGAGCCGGCCGGCAGCT  
>Chrysemys-mir-26-3-5p  
TTCAAGTAATCCAGGATAGGCT  
>Chrysemys-mir-26-3-3p  
CCTGTTCTCGATTACTTGGCGC

>Chrysemys-mir-27a\_pre  
GATACCGGGTGCAGGGCTTAGCTCACCTGTGAACAGAGTTCGCATCCGTATCGTGTTCACAGTGGCTAAGTTCCGCCCCCGGGTCCGTT  
>Chrysemys-mir-27a-5p

---

AGGGCTTAGCTCACCTGTGAA  
>Chrysemys-mir-27a-3p  
TTCACAGTGGCTAAGTTCCGC

>Chrysemys-mir-27b\_pre  
ACCTCTCTAACAAGGTGCAGAGCTTAGCTGATTGGTGAACAGTGATTGATTTCTCTTTTGTTCACAGTGGCTAAGTTCTGCACCTGAAGAGAAGGT  
>Chrysemys-mir-27b-5p  
AGAGCTTAGCTGATTGGTGAAC  
>Chrysemys-mir-27b-3p  
TTCACAGTGGCTAAGTTCTGC

>Chrysemys-mir-29a-1\_pre  
ACCCCTTTAGAGGATGACTGATTTCTTTTGGTGTTCAGAGTCAATACTATTTTCTAGCACCATTTGAAATCGGTTATAGTGACTGGGGAATTGCAT  
>Chrysemys-mir-29a-1-3p  
TAGCACCATTTGAAATCGGTTA  
>Chrysemys-mir-29a-1-5p  
ACTGATTTCTTTTGGTGTTCAGA

>Chrysemys-mir-29a-2\_pre  
AATCTCTCTTACACAGGCTGACCGATCTCTCTTGGTGTTCAGAGTTTTCAGTTTTTGTCTAGCACCATTTGAAATCGGTTATGATGTAGGGGGAAA  
>Chrysemys-mir-29a-2-3p  
TAGCACCATTTGAAATCGGTTA  
>Chrysemys-mir-29a-2-5p  
TGACCGATCTCTCTTGGTGTTC

>Chrysemys-mir-29b-1\_pre  
CTCCCTCAGGAAGCTGGTTTTCATATGGTGGTTTTAGATTTAACTACTCCGTGTCTAGCACCATTTGAAATCAGTGTCTTTGGAGGAAGAATG  
>Chrysemys-mir-29b-1-3p  
TAGCACCATTTGAAATCAGTG  
>Chrysemys-mir-29b-1-5p  
CTGGTTTTCATATGGTGGTTTTAGA

>Chrysemys-mir-29b-2\_pre  
GTCTTCTTCTGGAAGCTGGTTTTACATGGTGGCTTAGATTTTCCCATCTTTGTATCTAGCACCATTTGAAATCAGTGTCTTAGGAGCAAGAA  
>Chrysemys-mir-29b-2-3p  
TAGCACCATTTGAAATCAGTG  
>Chrysemys-mir-29b-2-5p  
CTGGTTTTACATGGTGGCTTAGAT

>Chrysemys-mir-30a\_pre  
GCTGTTGACAGTGAGCGACTGTAAACATCCTCGACTGGAAGCTGTGAAGCAGCAGATGGGGCTTTTCAGTCGGATGTTTGCAGCTGCCAACTGCCAC  
>Chrysemys-mir-30a-5p  
TGTAACATCCTCGACTGGAC  
>Chrysemys-mir-30a-3p  
CTTTCAGTCGGATGTTTGCAGC

>Chrysemys-mir-30b\_pre  
TACTGATTTTTAGTTTCATGTAAACATCCTTACACTCAGCTATAAAACATAGAACGGCTGGGAGGTGGATGTTTACTTCAACTGACTTGGAAA  
>Chrysemys-mir-30b-5p  
TGTAACATCCTTACACTCAGCT  
>Chrysemys-mir-30b-3p  
CTGGGAGGTGGATGTTTACTTC

>Chrysemys-mir-30c-1\_pre  
GCCATGCTGTAGCATGTGTAAACATCCTTACACTCTCAGCTGTGGACTCAAGGTAGCTGGGAGAGGGTTGTTTACTCCTTCTGCCATGGACTGAA  
>Chrysemys-mir-30c-1-5p  
TGTAACATCCTTACACTCTCAGCT



---

>Chrysemys-mir-30c-1-3p  
CTGGGAGAGGGTTGTTTACTCC

>Chrysemys-mir-30c-2\_pre  
AGCTCTGAGTGGCAGGACTGTAAACATCCTTACACTCTCAGCTGTGGAAAGTAAGGAAGCTGGGAGAAGGCTGTTTACTCTCTCTGCCTTGGAAAG  
>Chrysemys-mir-30c-2-5p  
TGTA AACATCCTTACACTCTCAGCT  
>Chrysemys-mir-30c-2-3p  
CTGGGAGAAGGCTGTTTACTCT

>Chrysemys-mir-30d\_pre  
TATTGTAGTCTGTTGTTGTAAACATCCCCGACTGGAAGCTGTAAGAGAAATTCTAGCTTTCAGTCAGATGTTTGTCTGCATCCGGCTATTCATGG  
>Chrysemys-mir-30d-5p  
TGTA AACATCCCCGACTGGAAGC  
>Chrysemys-mir-30d-3p  
CTTTCAGTCAGATGTTTGTCTGC

>Chrysemys-mir-30e\_pre  
GGGCAGTCGTTGCTACTGTAAACATCCTTGACTGGAAGCTGTAAGGTGCTAGAAGGGAGCTTTCAGTCGGATGTTTACAGCGGCAGGCTGCCACAG  
>Chrysemys-mir-30e-5p  
TGTA AACATCCTTGACTGGAAGCT  
>Chrysemys-mir-30e-3p  
CTTTCAGTCGGATGTTTACAGC

>Chrysemys-mir-31\_pre  
GTTATTAATCAGACTTTGAGGGGAGGCAAGATGTTGGCATAGCTGTTGACCTAATAACCTGCTATGCCAACATATTGTCATCTTTCTCGTCTATTT  
>Chrysemys-mir-31-5p  
AGGCAAGATGTTGGCATAGCTG  
>Chrysemys-mir-31-3p  
TGCTATGCCAACATATTGTCATC

>Chrysemys-mir-32\_pre  
GCTTGCTCTGGTGGAGATATTGCACATTACTAAGTTGCATGTTGTCTACGGCCTCAGTGCAATTTAGTGTGTGCGATATTTTACATGAGTGCATGC  
>Chrysemys-mir-32-5p  
TATTGCACATTACTAAGTTGCA  
>Chrysemys-mir-32-3p  
CAATTTAGTGTGTGCGATATT

>Chrysemys-mir-33-1\_pre  
GGGGGGCAGCTGTAGTGCATTGTAGTTGCATTGCATGTTCTGGCAGTACTTGTGCAATGTTTCTGCAGTGCAGTACAGAGGCACTCTC  
>Chrysemys-mir-33-1-5p  
GTGCATTGTAGTTGCATTGCA  
>Chrysemys-mir-33-1-3p  
CAATGTTTCTGCAGTGCAGT

>Chrysemys-mir-33-2\_pre  
AGTGGCCGAGCTGTGGTGCATTGTAGTTGCATTGCATGTGTGAGAACAGGTGTGCAATGCCCTGCAGTGCAGCCCAGATGGGGCTTCTTT  
>Chrysemys-mir-33-2-5p  
GTGCATTGTAGTTGCATTGCA  
>Chrysemys-mir-33-2-3p  
CAATGCCCTGCAGTGCAGCC

>Chrysemys-mir-34a\_pre  
GTGAGTGTCTTTTGGCAGTGTCTTAGCTGGTTGTTGTGAGCAATAATCAAGGAAGCAATCAGCAAGTATACTGCCCTAGAAGTGCTGCACAT  
>Chrysemys-mir-34a-5p  
TGGCAGTGTCTTAGCTGGTTGT  
>Chrysemys-mir-34a-3p

AATCAGCAAGTATACTGCCCTA

>Chrysemys-mir-34b\_pre

GAAGTAGTGTGGTTGGTTGTAGGCAGTGTAGTTAGCTGATTGTATCCATCTCTTTGCAATCACTAACTTTACTGCCATCAAAACAAGACACAGAATT

>Chrysemys-mir-34b-5p

AGGCAGTGTAGTTAGCTGATTG

>Chrysemys-mir-34b-3p

ATCACTAACTTTACTGCCATC

>Chrysemys-mir-34c\_pre

ACATTAGCCTAGTTACCAGGCAGTGTAGTTAGCTGATTGCTAAAGGTACAATCACTAACCACACAGCCAGGTAAAAAGGTATGTAA

>Chrysemys-mir-34c-5p

AGGCAGTGTAGTTAGCTGATTGC

>Chrysemys-mir-34c-3p

AATCACTAACCACACAGCCA

>Chrysemys-mir-92a-1\_pre

TGTACCCCTTTCTACACAGGTTGGGATCAGTTGCAATGCTGTGTGTGCCTGTAGTATTGCACTTGTCCCGGCCTGTTGAGGTTGGTGGGGACAG

>Chrysemys-mir-92a-1-3p

TATTGCACTTGTCCCGGCCT

>Chrysemys-mir-92a-1-5p

AGGTTGGGATCAGTTGCAATGCT

>Chrysemys-mir-92a-2\_pre

TGGTTTCTCCATGGGTGGGGATTTGTTGCATTACTTGTAGCTATGTGTAGAGTATTGCACTTGTCCCGGCCTGTGGAGGAAAGGAGG

>Chrysemys-mir-92a-2-3p

TATTGCACTTGTCCCGGCCT

>Chrysemys-mir-92a-2-5p

GTGGGGATTTGTTGCATTACT

>Chrysemys-mir-92b\_pre

TCCAGGGCAGCAGGAGGGACGGGATGCTGTGCAGTGTGTTCTATCACCAACCAATATTGCACTCGTCCCGGCCTCCTGCCTCCTTGGGCT

>Chrysemys-mir-92b-5p

AGGGACGGGATGCTGTGCAGTGT

>Chrysemys-mir-92b-3p

TATTGCACTCGTCCCGGCCTCC

>Chrysemys-mir-92c\_pre

CCGGTCCCTTTTCGTTCTAAGGTTGGGAGAGCTGTAATTGGCATGACTATTTTTTCAGAGGCATTGCACTCGTCCCGGCCGGAGTCAGAAGGGATTTG

>Chrysemys-mir-92c-5p

AGGTTGGGAGAGCTGTAATTG

>Chrysemys-mir-92c-3p

CATTGCACTCGTCCCGGCCGGA

>Chrysemys-mir-93\_pre

TCCCAGAGGCTCCAAAGTGCTGTTTCGTGCAGGTAGCGTGTGCAGCCGACTACTGCCGAGTCAGCGCTTCGCGAGCCCCCGGACA

>Chrysemys-mir-93-5p

CAAAGTGCTGTTTCGTGCAGGT

>Chrysemys-mir-93-3p

ACTGCCGAGTCAGCGCTTCGC

>Chrysemys-mir-96\_pre

TATCTCTGCTTCGCCCGGTTTGGCACTAGCACATTTTTGCTTTTGTATAACTACTTTGAGCAATTATGTGTAGTGCCAATCTGGGAGAAGACGGAA

>Chrysemys-mir-96-5p

TTTGGCACTAGCACATTTTTGC

>Chrysemys-mir-98\_pre

---

---

```
GGATGAGGTAGTACGTTGTATTGTTGTGGGGTCGGGATTTCGTGCCCAATCAGAGATAACAATACAACCTTACTACTTTCCC
>Chrysemys-mir-98-5p
TGAGGTAGTACGTTGTATTGTT
>Chrysemys-mir-98-3p
CAATACAACCTTACTACTTTCCA

>Chrysemys-mir-99a_pre
TGGTGCCAATTGGCATAAACCCGTAGATCCGATCTTGTGGTAAAGTATACTGCACAAGCTCGCTTCTATGGGTCTGTGTCACTCTGGTGATCT
>Chrysemys-mir-99a-5p
AACCCGTAGATCCGATCTTGTG
>Chrysemys-mir-99a-3p
CAAGCTCGCTTCTATGGGTCTG

>Chrysemys-mir-99b_pre
CGTTGCCGGTTGCCATAAACCCGTAGATCCGAACCTTGCGGTACGACTGCCTCACACAAGCTCGAGTCTGTGGGTATGTGTTCGATCCTGGCCAGG
>Chrysemys-mir-99b-5p
AACCCGTAGATCCGAACCTTGCG
>Chrysemys-mir-99b-3p
CAAGCTCGAGTCTGTGGGTA

>Chrysemys-mir-100_pre
GCCCGTTGCCACAAACCCGTAGATCCGAACCTTGTGGTCATATTCCACACAAGCTTGTATCTATAGGTATGTGTCTGCATGGCAAATG
>Chrysemys-mir-100-5p
AACCCGTAGATCCGAACCTTGT
>Chrysemys-mir-100-3p
CAAGCTTGTATCTATAGGTATG

>Chrysemys-mir-101-1_pre
ACTGACAGGCTGCCCTGGCTCAGTTATCACAGTGCTGATGCTGTCTATTCTAAAGGTACAGTACTGTGATAACTGAAGGATGGCAGCCATCTTAGC
>Chrysemys-mir-101-1-3p
TACAGTACTGTGATAACTGAAG
>Chrysemys-mir-101-1-5p
TCAGTTATCACAGTGCTGATGCT

>Chrysemys-mir-101-2_pre
ATGAACTGTCTTTTTTCGGTTATCATGGTACCGGTGCTGTATACGTGAAAGGTACAGTACTGTGATAACTGAAGAATGATGGTGCCATCA
>Chrysemys-mir-101-2-3p
TACAGTACTGTGATAACTGAAG
>Chrysemys-mir-101-2-5p
TCGGTTATCATGGTACCGGTGC

>Chrysemys-mir-103-1_pre
GGAATGTCTCATTGTCTTTCGGCTTCTTTACAGTGCTGCCTTGTTCATATGGATCAAGCAGCATTGTACAGGGCTATGAAGGCATTAAGTCTTGC
>Chrysemys-mir-103-1-3p
AGCAGCATTGTACAGGGCTAT

>Chrysemys-mir-103-2_pre
AGCTCTGTGCTTTTACAGTCTTTTACAGTGCTGCCTTGTTCATTCATGTCAAGCAGCATTGTACAGGGCTATGAAAGAACTGAGACCCGTTTC
>Chrysemys-mir-103-2-3p
AGCAGCATTGTACAGGGCTAT
>Chrysemys-mir-103-2-5p
AGCTTCTTTTACAGTGCTGCCTTGT

>Chrysemys-mir-106a_pre
TGAGTTGTGCAAAAGTGCTTACAGTGCAAGGTAGTGTGTTGGTATCTACTGCAGTGGAAGCACTTCTAGCATTACAATG
>Chrysemys-mir-106a-5p
AAAAGTGCTTACAGTGCAAGGTAG
```

---

>Chrysemys-mir-106b\_pre  
CCGGCTCCG CAGGGCTAAAGTGTGACAGTGCAGGTAGCTAGCGTCTGGTTGCTACTGCAGTGTGGGGGCTTGCAGCTCTGGGGGGCCACTG  
>Chrysemys-mir-106b-5p  
TAAAGTGTGACAGTGCAGGT

>Chrysemys-mir-107\_pre  
TTCTTTTTGCTTTTCAGCTTCTTTACAGTGTTCCTTGTGGCATGGAGTTCAAGCAGCATTGTACAGGGCTATCAAAGCATCGAGAGTT  
>Chrysemys-mir-107-3p  
AGCAGCATTGTACAGGGCTA

>Chrysemys-mir-122\_pre  
CTGCCAGAGCTGTGGAGTGTGACAATGGTGTGTTGTGTCCAATCTATCAAACGCCATTATCACACTAAATAGCTACTGTTAGATA  
>Chrysemys-mir-122-5p  
TGGAGTGTGACAATGGTGTGTTG  
>Chrysemys-mir-122-3p  
AAACGCCATTATCACACTAAAT

>Chrysemys-mir-124-1\_pre  
CCTCTCTCCGTGTTTACAGCGGACCTTGATTTAAATGTCCATACAATTAAGGCACGCGGTGAATGCCAAGAACGAGGCTGAAT  
>Chrysemys-mir-124-2\_pre  
CGAGGCTCTGACTCTCCGTGTTTACAGCGGACCTTGATTTAATGTCCATACAATTAAGGCACGCGGTGAATGCCAAGAGCGGAGCCTGAAGC  
>Chrysemys-mir-124-3\_pre  
CGAGCCCCTCTCTGCGTGTTCACAGCGGACCTTGATTTAATGTCCATACAATTAAGGCACGCGGTGAATGCCAAGAGAGGAGCCT  
>Chrysemys-mir-124-4\_pre  
CGCTCGGCTTCCGCTTTTCGTGTTTACAGCGGACCTTGATTTAATTTTCATACAATTAAGGCACGCGGTGAATGCCAAGAGAGAAGCCGGACT  
>Chrysemys-mir-124-3p  
TAAGGCACGCGGTGAATGCCA  
>Chrysemys-mir-124-5p  
CGTGTTCACAGCGGACCTTGA

>Chrysemys-mir-125a\_pre  
GGCAGCCGTCTCTGTCCCTGAGACCCTTAACCTGTGAGGGCAGCGCAGAATTCACAGGTGAGGTTCTTTGGGAACCGAGCGACTGGCCC  
>Chrysemys-mir-125a-5p  
TCCCTGAGACCCTTAACCTGTG  
>Chrysemys-mir-125a-3p  
ACAGGTGAGGTTCTTTGGGAACC

>Chrysemys-mir-125b-1\_pre  
TGTTGCGCCCTCTCAATCCCTGAGACCCTAACTTGTGATGTTTAGCTTTTAAATCCACGGGTTAGGCTCTTTGGGAGCTGTGAGTTGTGCTTTGAC  
>Chrysemys-mir-125b-1-5p  
TCCCTGAGACCCTAACTTGTGA  
>Chrysemys-mir-125b-1-3p  
ACGGGTTAGGCTCTTTGGGAGC

>Chrysemys-mir-125b-2\_pre  
CGGACTTTTCTAGTCCCTGAGACCCTAACTTGTGAGGTTTTTTAGCAACAATCACAAGTCAGGCTCTTTGGGACCTAGGCGGAGGGGAACCA  
>Chrysemys-mir-125b-2-5p  
TCCCTGAGACCCTAACTTGTGA  
>Chrysemys-mir-125b-2-3p  
ACAAGTCAGGCTCTTTGGGACCT

>Chrysemys-mir-126\_pre  
GGCGGCGACGCTGGTGCCGGCCCATTTACTTTTGGTACGCGCTGTGACACTTCAAACCTCGTACCGTGAGTAATAATGCGCTGCGGCCAGCCCTG  
>Chrysemys-mir-126-3p  
TCGTACCGTGAGTAATAATGCG  
>Chrysemys-mir-126-5p

CATTATTACTTTTGGTACGCG

>Chrysemys-mir-128-1\_pre

TTGTGAGCTGTTGGATTTCGGGGCCGTAACACTGTCTGAGAGGGTTACATTTCTCACAGTGAACCGGTCTCTTTTTTCAGCTGCTTCCTCG

>Chrysemys-mir-128-1-3p

TCACAGTGAACCGGTCTCTTT

>Chrysemys-mir-128-1-5p

CGGGGCCGTAACACTGTCTGAGA

>Chrysemys-mir-128-2\_pre

AGCGATGGGCAGTTGGAAGGGGGCCGTTACACTGTAAGAGAGTGAGTAGCAGGTCTCACAGTGAACCGGTCTCTTTTTCTACTGTGTCATGCCA

>Chrysemys-mir-128-2-3p

TCACAGTGAACCGGTCTCTTT

>Chrysemys-mir-128-2-5p

AGGGGCCGTTACACTGTAAGA

>Chrysemys-mir-129-1\_pre

TCTCTCTTGATCTTTTTGCGGTCTGGGCTTGCTGTTCTCCAATCAGTAGTCAGGAAGCCCTTACCCCAAAAAGTATTTGCGAGGGAT

>Chrysemys-mir-129-1-5p

CTTTTTGCGGTCTGGGCTTGC

>Chrysemys-mir-129-1-3p

GGAAGCCCTTACCCCAAAAAGT

>Chrysemys-mir-129-2\_pre

GTCCTTCGCAATCTTTTTGCGGTCTGGGCTTGCTGTATATAACTACCTAGCCGGGAAGCCCTTACCCCAAAAAGCATTCGCGGAGGG

>Chrysemys-mir-129-2-5p

CTTTTTGCGGTCTGGGCTTGC

>Chrysemys-mir-129-2-3p

AAGCCCTTACCCCAAAAAGCA

>Chrysemys-mir-130a\_pre

CACGCCCGCTCCTGGGCTCTTTTCACATTGTGCTACTGTCTGAGCCCTGCCAAGCAGTGCAATGTCAAAGGGCATCGGGCAGGCGGTGCCGGC

>Chrysemys-mir-130a-3p

CAGTGCAATGTCAAAGGGC

>Chrysemys-mir-130a-5p

GCTCTTTTCACATTGTGCTACT

>Chrysemys-mir-130b\_pre

CAGGCAGGCTGCCACTCTTTCCCTGTTGCACTACTGTTAAACTTGTAGCTAGCAGTGCAATAATGAAAGGGCGTCGGTCTGCCAG

>Chrysemys-mir-130b-3p

CAGTGCAATAATGAAAGGGCGT

>Chrysemys-mir-130b-5p

ACTCTTTCCCTGTTGCACTACT

>Chrysemys-mir-130c\_pre

ACTGTTGTCCAGAGCCCTTTTTCTGTTGTACTACTGGCAATTATGATGAGCAGTGCAATATTTAAAAGGGCATTTGGCTGGCAGAAA

>Chrysemys-mir-130c-3p

CAGTGCAATATTTAAAAGGGCAT

>Chrysemys-mir-130c-5p

GCCCTTTTTCTGTTGTACTACT

>Chrysemys-mir-130d\_pre

AGTGGTGTCTGTCCAGTGCCCTTTTTATGTTGTACTACTAGTGATCATACACAAAAAGCAGTGCAATGTTAAAAGGGCATTTGGCCAGTGATACTGT

>Chrysemys-mir-130d-3p

AGTGCAATGTTAAAAGGGCATT

>Chrysemys-mir-132\_pre

---

TGTCTCCAGGGCAACCGTGGCTTTAGATTGTTACTGTGGTTGTGTGTTGGTAAACAGTCTACAGCCATGGTCGCTTGGGCTAGACACAC  
>Chrysemys-mir-132-5p  
ACCGTGGCTTTAGATTGTTACT  
>Chrysemys-mir-132-3p  
TAACAGTCTACAGCCATGGTCG

>Chrysemys-mir-133a-1\_pre  
TCCAATGCTTTGCTAAAGCTGGTAAAATGGAACCAAATCACCTCTTCAATGGATTTGGTCCCCTTCAACCAGCTGTAGCTATGCATTGAT  
>Chrysemys-mir-133a-1-3p  
TTTGGTCCCCTTCAACCAGCTGT  
>Chrysemys-mir-133a-1-5p  
AGCTGGTAAAATGGAACCAAAT

>Chrysemys-mir-133a-2\_pre  
AGGCCAAATGCTTTGCTAAAGCTGGTAAAATGGAACCAAATCAACTGTTCAATGGATTTGGTCCCCTTCAACCAGCTGTAGCTGTGCATTGATC  
>Chrysemys-mir-133a-2-3p  
TTTGGTCCCCTTCAACCAGCTGT  
>Chrysemys-mir-133a-2-5p  
AGCTGGTAAAATGGAACCAAAT

>Chrysemys-mir-133b\_pre  
AGGGGCTGCACCCTGCTCTGGCTGGTCAAACGGAACCAAGTCCGCTTTCCTTGGAGGTTTGGTCCCCTTCAACCAGCTACAGCAGTGCTGAAATC  
>Chrysemys-mir-133b-3p  
TTTGGTCCCCTTCAACCAGCTG

>Chrysemys-mir-133c\_pre  
CTGGAGAGAGTGTGTCCCTGGGGCTGGTAAAAAGGAACCAGATCAACTTGGAACTGGATTTGGTCCCCTTCAACCAGCTGCAGTGGCGCATACGCC  
>Chrysemys-mir-133c-3p  
TTTGGTCCCCTTCAACCAGCTG

>Chrysemys-mir-135-1\_pre  
TCCCACTGTCTTCTATGGCTTTTTATTCCCTATGTGATTATACTGCTAATTTTCATATAGGGATTGAAGCCGTGCAATACGCTGGGGCT  
>Chrysemys-mir-135-1-5p  
TATGGCTTTTTATTCCCTATGTG  
>Chrysemys-mir-135-1-3p  
ATATAGGGATTGAAGCCGTGCA

>Chrysemys-mir-135-2\_pre  
AATTCCTCTAGTGTTTTATGGCTTTTTATTCCCTATGTGATAGTAATAAAGTCTCATGTAGGGATGGAAGCCATGAAATACATTGTGAAAA  
>Chrysemys-mir-135-2-5p  
TATGGCTTTTTATTCCCTATGTG  
>Chrysemys-mir-135-2-3p  
TGTAGGGATGGAAGCCATGAAT

>Chrysemys-mir-135-3\_pre  
GCCCTCTGCTGTGGTCTATGGCTTTTTATTCCCTATGTGATTGCGTTTCCCTAACTCATGTAGGGCTAAAAGCCATGGGCTACACAGAGGACA  
>Chrysemys-mir-135-3-5p  
TATGGCTTTTTATTCCCTATGTG  
>Chrysemys-mir-135-3-3p  
ATGTAGGGCTAAAAGCCATGGG

>Chrysemys-mir-137a\_pre  
ACTCTCTTCGGTGACGGGTATTCTTGGGTGGATAAATACGGATTACGTTGTTATTGCTTAAGAATACGCGTAGTCGAGGAGAGTACCC  
>Chrysemys-mir-137a-3p  
TTATTGCTTAAGAATACGCGTAG

>Chrysemys-mir-137b\_pre

---

AGCCCACTAGCTCCCTTCGATGACGGGTATTCTTGGGTAGATAATACGGATTGCGTTGTTATTGCTTGAGAATACGCGTAGCCGAGGGGAGAGTCG  
>Chrysemys-mir-137b-3p  
TTATTGCTTGAGAATACGCGTAG  
>Chrysemys-mir137b-5p  
ACGGGTATTCTTGGGTAGAT

>Chrysemys-mir-138\_pre  
GGTATTGTTGCTGCAGCTGGTGTGTGAATCAGGCCGACAACAAGCTCATCCTACTATCCGGCTATTTCACTACACCAGGGTTGCATCATAACCAC  
>Chrysemys-mir-138-5p  
AGCTGGTGTGTGAATCAGGC  
>Chrysemys-mir-138-3p  
GCTATTTCACTACACCAGGGT

>Chrysemys-mir-139\_pre  
CGGAGAGGCCTGGCTGTATTCTACAGTGCATGTGTCTCCAGTGTACTAAGCAACTGGAGATGCAGCCCTGTTGGAATAACAGCCAGAGCCAATAT  
>Chrysemys-mir-139-5p  
TCTACAGTGCATGTGTCTCCAGT  
>Chrysemys-mir-139-3p  
TGGAGATGCAGCCCTGTTGGAAT

>Chrysemys-mir-140\_pre  
TCTCTGTGTCTCCAGTGGTTTTACCCTATGGTAGGTTACGTGCATGCTGTTCTACCACAGGGTAGAACCACGGACAGGATACCGGGCGC  
>Chrysemys-mir-140-3p  
TACCACAGGGTAGAACCACGGA  
>Chrysemys-mir-140-5p  
CAGTGGTTTTACCCTATGGTAG

>Chrysemys-mir-142-1\_pre  
AGACAGTGCAGTCACCCATAAAGTAGAAAGCACTACTAAACAGCACTGCAGGGTGTAGTGTTCCTACTTTATGGATGAGTGTACTGTG  
>Chrysemys-mir-142-2\_pre  
ACAGTGCCTCCATAAAGTAGAAAGCACTACTAAACCGCCGCGTCCCGTGTAGTGTTCCTACTTTATGGATGAGTGTACTGTGA  
>Chrysemys-mir-142-3p  
TGTAGTGTTCCTACTTTATGG  
>Chrysemys-mir-142-5p  
CATAAAGTAGAAAGCACTACTA

>Chrysemys-mir-143\_pre  
AGCTCCGTCAATGTCTCCCAGCCCAAGGTGCAGTGCATCTCTGGTCAGTTGTGAGTCTGAGATGAAGCACTGTAGCTCGGGAAGGGAGGAACT  
>Chrysemys-mir-143-3p  
TGAGATGAAGCACTGTAGCTC  
>Chrysemys-mir-143-5p  
GGTGCAGTGCATCTCTGG

>Chrysemys-mir-144\_pre  
TGGGGCTCTGGGCAGGATATCATCGTATACTGTAAGTTTGCTATGAGACACTACAGTATAGATGATGTACTATCCTGAGCTTCACCCCT  
>Chrysemys-mir-144-5p  
GGATATCATCGTATACTGTAAG  
>Chrysemys-mir-144-3p  
TACAGTATAGATGATGTACTA

>Chrysemys-mir-145\_pre  
GTGTCCTCAGGGTCCAGTTTTCCAGGAATCCCTTAGGCACTATGACGGGGATTCCCTGGAAATACTGTTCTTGAGGCCATGGCTCAGCAGCT  
>Chrysemys-mir-145-5p  
GTCCAGTTTTCCAGGAATCCCT  
>Chrysemys-mir-145-3p  
GGATTCTTGAAATACTGTTCT

---

>Chrysemys-mir-146a\_pre  
GTATTCTCAGCTTTGAGAACTGAATTCCATGTGTTGTAATTGAATCTCTGTGACACCCATGGGGCTCAGTTCTTCAGCTTGGATATCT

>Chrysemys-mir-146a-5p  
TGAGAACTGAATTCCATGTGTTG

>Chrysemys-mir-146a-3p  
ACCCATGGGGCTCAGTTCTTCA

>Chrysemys-mir-146b\_pre  
AGCTGCTTGGCTTTGAGAACTGAATTCCATAGGCTTTAAAAATAATGAAAACGCCCTGTGGCTTCAGTTCTGTAGCTGGGTAGCAA

>Chrysemys-mir-146b-5p  
TGAGAACTGAATTCCATAGGCTTT

>Chrysemys-mir-146b-3p  
CGCCCTGTGGCTTCAGTTCTGTA

>Chrysemys-mir-146c\_pre  
GCAGTTCCCAGCTCTGAGAACTGAATTCCATGGACTGGTTTTTCAGTTCTGTATCTTCAGTCCATGGTAGTCAGTTCTCTAGCTTGGCTGTAT

>Chrysemys-mir-146c-5p  
TGAGAACTGAATTCCATGGACTG

>Chrysemys-mir-146c-3p  
GTCCATGGTAGTCAGTTCTCTA

>Chrysemys-mir-147\_pre  
TACTCTATGAATCTAGTGGAAATCATTCTGCACAAACTCGACTACTGAAATCAGTGTGCGGAAATGCTTCTGCTACATTTTTAGGGTCTC

>Chrysemys-mir-147-3p  
GTGTGCGGAAATGCTTCTGC

>Chrysemys-mir-147-5p  
TGGAATCATTCTGCACAAACTC

>Chrysemys-mir-148a\_pre  
GATTTAGTCTCTTGAAGCAAAGTTCTGTGACACTCAGACTCTGATTATGATAGAAAGTCAGTGCACACTACAGAACTTTGTCTTTGGGGGCTGTAGCAG

>Chrysemys-mir-148a-3p  
TCAGTGCACACTACAGAACTTTGT

>Chrysemys-mir-148a-5p  
AAAGTTCTGTGACACTCAGACT

>Chrysemys-mir-148b\_pre  
AGCCCGCAGCATTTGAGGTGAAGTTCTGTTATACACTCTGACTGTGGCTACGTGGAGGTCAGTGCATCACAGAACTTTGTCTCGAGAGCTTTTTTA

>Chrysemys-mir-148b-3p  
TCAGTGCATCACAGAACTTTGT

>Chrysemys-mir-152\_pre  
GTCCTCTCGGCCAGGTTCTGTGGTACACTTGGACTTGGACTCTGGAGCAGTCAGTGCATGACAGAACTTGGGTTTGGATGGACCCT

>Chrysemys-mir-152-3p  
TCAGTGCATGACAGAACTTGG

>Chrysemys-mir-152-5p  
AGGTTCTGTGGTACACTTGGACT

>Chrysemys-mir-153-1\_pre  
CAGCTGCCAGTGCCATTTTTGTGATTTGCAGCTAGTAATCTGGGTCCAGTTGCATAGTCACAAAAGTGAGCATTTGGCAGCCGTGCCT

>Chrysemys-mir-153-1-3p  
TTGCATAGTCACAAAAGTGA

>Chrysemys-mir-153-1-5p  
CCATTTTTGTGATTTGCAGCT

>Chrysemys-mir-153-2\_pre  
GCGGTTGCCAGTGTCAATTTTTGTGATGTTGCAGCTAGTAATATGAGCCCAGTTGCATAGTCACAAAAGTGATCATTTGGAAACTGTG

>Chrysemys-mir-153-2-3p



TTGCATAGTCACAAAAGTGA

>Chrysemys-mir-155a\_pre

TAGGCTGTATGTTGTTAATGCTAATCGTGATAGGGGTTTTTACCTATGACTGACTCCTACATGTTAGCATTAACACTGTATGATGCCTTT

>Chrysemys-mir-155a-5p

TTAATGCTAATCGTGATAGGGG

>Chrysemys-mir-155b\_pre

CTTGCCAGAAAGTGTTAATGCTACTCATGTTAGGGGTGTGAAATGAAGTAGCCCTTGCCTGGTAGCATTGGCCCTTACTGAGAAACAAGCCC

>Chrysemys-mir-155b-5p

TTAATGCTACTCATGTTAGGGG

>Chrysemys-mir-181a-1\_pre

GTTGCTTCAGTGAACATTCAACGCTGTCGGTGAGTTTGGAAATTAAGTGAAAACCATCGACCGTTGATTGTACCTCCAGCTAACCATCA

>Chrysemys-mir-181a-1-5p

AACATTCAACGCTGTCGGTGAGT

>Chrysemys-mir-181a-1-3p

ACCATCGACCGTTGATTGTAC

>Chrysemys-mir-181a-2\_pre

GATAGCTTCAGTGAACATTCAACGCTGTCGGTGAGTTTGGAGAAATAGAAAAACCATCGACCGTTGACTGTACCTTGAGGTATATCACA

>Chrysemys-mir-181a-2-5p

AACATTCAACGCTGTCGGTGAGT

>Chrysemys-mir-181a-2-3p

ACCATCGACCGTTGACTGTACC

>Chrysemys-mir-181a-3\_pre

CAAAGGTTTCAGTGAACATTCAACGCTGTCGGTGAGTTTCTCAATAAGGTTAAACCATCGACCGTTGAGTGTACCTTGCGGCCGGATT

>Chrysemys-mir-181a-3-5p

AACATTCAACGCTGTCGGTGAGT

>Chrysemys-mir-181a-3-3p

ACCATCGACCGTTGAGTGTACC

>Chrysemys-mir-181b-1\_ppre

AGGTCACAATCAACATTCAATTGCTGTCGGTGGGTTTAACTATGTGGACAAGCTCACTGAACAATGAATGCAACTGTGGCCCCAC

>Chrysemys-mir-181b-1-5p

AACATTCAATTGCTGTCGGTGGGTT

>Chrysemys-mir-181b-1-3p

GCTCACTGAACAATGAATGCA

>Chrysemys-mir-181b-2\_pre

GCATCTAATGGCTGCAATCAACATTCAATTGCTGTCGGTGGGTTTGTAGTTTGTATCAACTCACTGATCAATGAATGCAAACTGCGGACCAGGTAGCT

>Chrysemys-mir-181b-3\_pre

CGAAAAGTCACAATCAACATTCAATTGCTGTCGGTGGGTTGTGTTGTTGAAGGAAAAACTCACTGATCAATGAATGCAACTGTGATTGGAATGGA

>Chrysemys-mir-181b-5p

AACATTCAATTGCTGTCGGTGGGTT

>Chrysemys-mir-181b-3p

CTCACTGATCAATGAATGCA

>Chrysemys-mir-182\_pre

TCTCTCTCGCTGTCTTTGGCAATGGTAGAACTCACACTGGTGAGGTATCAGGATCCGGTGGTTCTAGACTTGCCAACTACCGCCCCGAGGGTACA

>Chrysemys-mir-182-5p

TTTGGCAATGGTAGAACTCACACT

>Chrysemys-mir-182-3p

TGGTTCTAGACTTGCCAACTA

>Chrysemys-mir-183\_pre

---

CGCTTACTCCTGTTCTGTGTATGGCACTGGTAGAATTCAGTGTGAAAACACACTATCAGTGAATTACCATAGGGCCATAAACAGAGCAGAGAAAGA  
>Chrysemys-mir-183-5p  
TATGGCACTGGTAGAATTCAC

>Chrysemys-mir-184\_pre  
GCAGCCATTCTCGTGTCTTATCACTTTTCCAGCCCAGCTTTTTCATTGTAAGTGTGGACGGAGAACTGATAAGGGTATGTGACTGACATGAA  
>Chrysemys-mir-184-3p  
TGGACGGAGAACTGATAAGGGT

>Chrysemys-mir-187\_pre  
CTGACATATTGTGAGACCTCGGGCTACAACACAGGACATGGGAGCTTTTCTGAACCCCTCGTGTCTTGTGTTGCAGCCAGAGGGGCACATCTTTACA  
>Chrysemys-mir-187-3p  
TCGTGTCTTGTGTTGCAGCCAG  
>Chrysemys-mir-187-5p  
GGCTACAACACAGGACATGGGA

>Chrysemys-mir-190a\_pre  
TGCAGGGCTCTGTGTGATATGTTTGATATATTAGGTTGTTATTTAATCCAACCTATATATCAAACATATTCTTATAGTGTCTGCCC  
>Chrysemys-mir-190a-5p  
TGATATGTTTGATATATTAGGT  
>Chrysemys-mir-190-3p  
ACTATATATCAAACATATTCTT

>Chrysemys-mir-190b\_pre  
TGCCCCTGCCGCTGGCTGATATGTTTGATATTAGGTTGTTTTATTGGAAAACCAACTAAATATCAAACATATTCTTCCGGCGCCAGGGCCGCT  
>Chrysemys-mir-190b-5p  
TGATATGTTTGATATTAGGTTG

>Chrysemys-mir-191\_pre  
TGATGGCACGACAGCGGGCAACGGAATCCCAAAGCAGCTGTCTTCTCTGAGCATTCCAGCTGCGGTGGATTTCGTTACCTGCTCTCCTGCCCG  
>Chrysemys-mir-191-5p  
CAACGGAATCCCAAAGCAGCT

>Chrysemys-mir-192\_pre  
AGTGCACAGGACTATGACCTATGAATTGACAGCCAGTCTTCTGCCGCGCCCTGGCTGTCAGTTCTGTAGGGCACAGGTATGTTACCT  
>Chrysemys-mir-192-5p  
ATGACCTATGAATTGACAGCC  
>Chrysemys-mir-192-3p  
CTGTCAGTTCTGTAGGGCACAG

>Chrysemys-mir-193a\_pre  
GGGCGAGTCTAGGGCTGGGTCTTTGCGGGCGAGATGAGAGGTTTGTGGATTCAACTGGCCTACAAAGTCCCAGTTCTCGGCTCC  
>Chrysemys-mir-193a-5p  
TGGGTCTTTGCGGGCGAGATG  
>Chrysemys-mir-193a-3p  
AACTGGCCTACAAAGTCCCAG

>Chrysemys-mir-193b\_pre  
TTGTGGTTCCAGAGTCGGGGTTTTGGGGGCGAGATGAGCTTATGTTTTATCCAACCTGGCCCACAAAGTCCCAGTTTTGGTGGTCACT  
>Chrysemys-mir-193b-3p  
AACTGGCCCACAAAGTCCCAGT

>Chrysemys-mir-194-1\_pre  
CAGTGTATCAGATGTAACAGCAACTCCATGTGGACTACACTGACTTCCAGTGGAGATGCTGTTACTTTTGGATATCTACTGAC  
>Chrysemys-mir-194-1-5p  
TGTAACAGCAACTCCATGTGGA  
>Chrysemys-mir-194-1-3p

CCAGTGGAGATGCTGTTACTTT

>Chrysemys-mir-194-2\_pre

GTGATGCCTATTGGATGTAACAGCAACTCCATGTGGAAGGTTTTTCATCCCTTTTCCAGTGGGGCTGCTGTTATTTTTGATAGGCTGTCAG

>Chrysemys-mir-194-2-5p

TGTAACAGCAACTCCATGTGGA

>Chrysemys-mir-194-2-3p

CCAGTGGGGCTGCTGTTATTT

>Chrysemys-mir-196-1\_pre

GAACTAGAACTGCTTTGTGAATTAGGTAGTTTTTCATGTTGTTGGGGTTTTATTTTTTAAACACAAGAACATAAAAACTACCTGATTTACTCCAGTTATT

>Chrysemys-mir-196-1-5p

TAGGTAGTTTTTCATGTTGTTGGG

>Chrysemys-mir-196-1-3p

CAAGAACATAAAAACTACCTGA

>Chrysemys-mir-196-2\_pre

TGCAGCTGATCTGTGGTTTTAGGTAGTTTTTCATGTTGTTGGGATTGGCTTTTAGCTCGGCAACAAGAACTGCCTTAATTACGTCAGTTAGTCT

>Chrysemys-mir-196-2-5p

TAGGTAGTTTTTCATGTTGTTGGG

>Chrysemys-mir-196-2-3p

TCGGCAACAAGAACTGCCTTA

>Chrysemys-mir-196-3\_pre

CTGAGAACTGTTCTGTAGTTTTAGGTAGTTTTTCATGTTGTTGGGGCTCCACCTTTCTCTCTGCAGCACGAACTGCCTTAATTACTTCAGTTGAAATC

>Chrysemys-mir-196-3-5p

TAGGTAGTTTTTCATGTTGTTGGG

>Chrysemys-mir-199-1\_pre

CCAGCCCAGCCTGCCAGTGTTCAGACTACCTGTTTCAGGAGGCTATCAAGGTGTACAGTAGTCTGCACATTGGTTAGATTGGGTTTTGGT

>Chrysemys-mir-199-1-5p

CCCAGTGTTCAGACTACCTG

>Chrysemys-mir-199-1-3p

ACAGTAGTCTGCACATTGGTTA

>Chrysemys-mir-199-2\_pre

GATCCTGCTCCGTCGCCAGTGTTCAGACTACCTGTTTCAGGACAATGCTGTTGTACAGTAGTCTGCACATTGGTTAGACTGGGCAAGGGAAA

>Chrysemys-mir-199-2-5p

CCCAGTGTTCAGACTACCTG

>Chrysemys-mir-199-2-3p

ACAGTAGTCTGCACATTGGTTA

>Chrysemys-mir-199-3\_pre

GCTCCACTCCGTCTGCCAGTGTTCAGACTACCTGTTTCAGGACTACGAGATTGTACAGTAGTCTGCACATTGGTTAGGCTGTGCTGGGA

>Chrysemys-mir-199-3-5p

CCCAGTGTTCAGACTACCTG

>Chrysemys-mir-199-3-3p

ACAGTAGTCTGCACATTGGTTA

>Chrysemys-mir-200a\_pre

TATGGTCCTCTGTGGACATCTTACTAGACAGTGTGGATTTTTTTGGATCTACTCTAACACTGTCTGGTAACGATGTTTAAAGGGTGAACCAA

>Chrysemys-mir-200a-3p

TAACACTGTCTGGTAACGATGTT

>Chrysemys-mir-200a-5p

CATCTTACTAGACAGTGTGGA

>Chrysemys-mir-200b\_pre

---

ACCCTGGGATGCCATTACCATCTTACTGGGCAGCATTGGATGTTTTCTGTGTTTTCTAATACTGCCTGGTAATGATGATTATGGTGTCTCGCAC  
>Chrysemys-mir-200b-3p  
TAATACTGCCTGGTAATGATGAT  
>Chrysemys-mir-200b-5p  
CATCTTACTGGGCAGCATTGGA

>Chrysemys-mir-202\_pre  
GCTCGTTGTTCCCTTTTTCTATGCATATACTTCTTTGAGAATTGGAACTAAAGAGGCATAGGGCATGGGAAAATGGGGCGACTGAGG  
>Chrysemys-mir-202-5p  
TTCCCTATGCATATACTTCTTTG

>Chrysemys-mir-203\_pre  
GCGGGCAGCCTCCTTGGTGCAGTGGTTCTTAAACAGTTCAACAGTTCTCTAGCATAAATTGTGAAATGTTTAGGACCACTTGACCAGGAAGGCCCGGG  
>Chrysemys-mir-203-3p  
GTGAAATGTTTAGGACCACTTGA  
>Chrysemys-mir-203-5p  
AGTGGTTCTTAAACAGTTCAACAG

>Chrysemys-mir-204-1\_pre  
TCATGTGACCCGTGGACTTCCCTTTGTGCATCCTATGCCTGAGAATATATGAAGGGGGCTGGGAAGGCAAAGGGACGTTCAACTGTCATCACTGGC  
>Chrysemys-mir-204-1-5p  
TTCCCTTTGTGCATCCTATGCCT  
>Chrysemys-mir-204-1-3p  
GCTGGGAAGGCAAAGGGACGT

>Chrysemys-mir-204-2\_pre  
GACCATGTGACCTGTGGGCTTCCCTTTGTGCATCCTATGCCTGGAGTTCATAGTGAGGCAGGGACAGCAAAGGGATGCTCAGTTGTCTGCTC  
>Chrysemys-mir-204-2-5p  
TTCCCTTTGTGCATCCTATGCCT

>Chrysemys-mir-204-3\_pre  
CCGGTGCGCCCTGTGAGCTTCCCTTTGTGCATCCTATGCCTGAGAGATGCCTGGAGGCTGGGACGGTGAAGGGAAGCCCACGTGGCTGCCAA  
>Chrysemys-mir-204-3-5p  
TTCCCTTTGTGCATCCTATGCCT  
>Chrysemys-mir-204-3-3p  
GCTGGGACGGTGAAGGGAAGC

>Chrysemys-mir-205a\_pre  
ATCCATGAATTCTGTTGTCTTTCATTCCACCGGAGTCTGTCTCATAACTAATCAGATTTTCAGTGGAGTGAAGCACAAGAGACATGGAG  
>Chrysemys-mir-205a-5p  
TCCTTCATTCCACCGGAGTCTG  
>Chrysemys-mir-205a-3p  
GATTTTCAGTGGAGTGAAGCACA

>Chrysemys-mir-205b\_pre  
TCCATGGCTTGCTGGTGCCTTTCATTCCACCGGAATCTGTAGAGGCAGAAACCAGATTTTCAGTGTAAATGAAGCCCATCAGACATGGAA  
>Chrysemys-mir-205b-5p  
CCCTTCATTCCACCGGAATCTGT

>Chrysemys-mir-206\_pre  
TTCTCTTTTGTAGACAACATGCTTCTTTATATCCCCATATGAATTATGCTGCTATGGAATGTAAGGAAGTGTGTGGTTTCAGGGAGATGA  
>Chrysemys-mir-206-3p  
TGGAATGTAAGGAAGTGTGTGG  
>Chrysemys-mir-206-5p  
ACATGCTTCTTTATATCCCCAT

>Chrysemys-mir-208\_pre

---

TTCTCTAACAGGGAAGCTTTTGGCTCGGGTTATATTTTCACTCGCGGCGTATAAGACGAGCAAAAAGCTTGTGGTTGGAGGAGA  
>Chrysemys-mir-208-5p (predicted)  
AAGCTTTTGGCTCGGGTTATAT

>Chrysemys-mir-210\_pre  
CAGAAGCTGGTGAGCCACTGACTAACGCACATTGTGCTGTTAAAGAATCCACTGTGCGTGTGACAGCGGCTAACCAGCTTTTCGGCC  
>Chrysemys-mir-210-3p  
CTGTGCGTGTGACAGCGGCTAA  
>Chrysemys-mir-210-5p  
AGCCACTGACTAACGCACATTG

>Chrysemys-mir-212\_pre  
GTCAGCGCTCGGCACCTTGGCTCTAGACTGATTACTGCTAAGTAGCATTAAAGAAACAGTAACAGTCTACAGTCATGGCTACTGAAGCATGA  
>Chrysemys-mir-212-5p  
ACCTTGGCTCTAGACTGATTA

>Chrysemys-mir-214\_pre  
GGACGGAGTTGTCATGTGTCTGCCTGTCTACACTTGTGTGCAGAACATCCTCTCACCTGTACAGCAGGCACAGACAGGCAGTCACATGACAACCC  
>Chrysemys-mir-214-3p  
TACAGCAGGCACAGACAGGCAG  
>Chrysemys-mir-214-5p  
GCCTGTCTACACTTGTGTGC

>Chrysemys-mir-215\_pre  
GTGTACAGGAAAATGACCTATGAATTGACAGACTGTGTCTTCTAAATTTGTCTGTCACTTCTGTAGGCCAATATTCTGCATGCCTTA  
>Chrysemys-mir-215-5p  
ATGACCTATGAATTGACAGAC  
>Chrysemys-mir-215-3p  
CTGTCACTTCTGTAGGCCAATA

>Chrysemys-mir-216a\_pre  
GGATGGCTGTGAATTGGCTTAATCTCAGCTGGCAACTGTGAGCAATTAATACATTCTCTCACAGTGGTATCTGGGATTATGCTAAACACAGCAATT  
>Chrysemys-mir-216a-5p  
TAATCTCAGCTGGCAACTGTGA

>Chrysemys-mir-216b\_pre  
AAGTCATAGACTGGGAAATCTCTGCAGGCAAATGTGATGTATTTATAGCAATCTCACAATTACCTGTAGAGTTTCTGCAATCTG  
>Chrysemys-mir-216b-5p  
AAATCTCTGCAGGCAAATGTG

>Chrysemys-mir-217\_pre  
AGTTTTTGTATGTCGAGATACTGCATCAGGAAGTATTGGATAATAATCAGCCACCATCAGTTCCCTAATGCATTGCCTTCAGCATCTATAACAAGCA  
>Chrysemys-mir-217-5p  
TACTGCATCAGGAAGTATTGG

>Chrysemys-mir-218-1\_pre  
AGCGAGATTTTCTGTTGTGCTTGATCTAACCATGTGGTTGCAAGGTATGAGTAAAACATGGTTCTGTCAAGCACCATGGAACGTCACGCAGCT  
>Chrysemys-mir-218-1-5p  
TTGTGCTTGATCTAACCATGTG

>Chrysemys-mir-218-2\_pre  
TGGGGTTTTCTTTGTGCTTGATCTAACCATGTGGTAGAACAATACAAATTTGAACATGGTTCTGTCAAGCACCATGGAAGGCTGCAT  
>Chrysemys-mir-218-2-5p  
TTGTGCTTGATCTAACCATGTG  
>Chrysemys-mir-218-2-3p  
AAACATGGTTCTGTCAAGCAC

---

>Chrysemys-mir-219-1\_pre  
CTGAACACCGGCTCCTGATTGTCCAAACGCAATTCTTGTGTCTGCGCCCAAGAATTGAGTGTGGACGTCGTGAGCCGGGGTTTCTCT

>Chrysemys-mir-219-1-3p  
AGAATTGTGTCTGGACATCTG

>Chrysemys-mir-219-1-5p  
TGATTGTCCAAACGCAATTCTTG

>Chrysemys-mir-219-2\_pre  
CAGGAATCTCTGCTCCTGATTGTCCAAACGCAATTCTTGTGCAATGGAATCATACAAACCAAGAATTGTGTCTGGACATCTGTGGCAGAGATTTCA

>Chrysemys-mir-219-2-3p  
AGAATTGTGTCTGGACATCTG

>Chrysemys-mir-219-2-5p  
TGATTGTCCAAACGCAATTCTTG

>Chrysemys-mir-221\_pre  
CCAGGTTTGGGGCATGAACCTGGCATAACAATGTAGAATTCTGTGTTTTGTTAAGCAACAGCTACATTGTCTGCTGGGTTTCAAGCTGCCTGGA

>Chrysemys-mir-221-5p  
ACCTGGCATAACAATGTAGAATT

>Chrysemys-mir-221-3p  
AGCTACATTGTCTGCTGGGTTT

>Chrysemys-mir-222a\_pre  
TGTAGTTGCCTATCAGTCGCTCAGTAGTCAGTGTAGATTCTGTCTTTACAATCAGCAGCTACATCTGGCTACTGGGTCTCTGATGACATCTT

>Chrysemys-mir-222a-3p  
AGCTACATCTGGCTACTGGGTCT

>Chrysemys-mir-222a-5p  
CGCTCAGTAGTCAGTGTAGATTC

>Chrysemys-mir-222b\_pre  
GATGCAATTGGCTGCTCAGTAGTCGGTGTAGGATCTGTCTGACATTATTACCAACAGCTACATCTGATTACTGGGTCACTGATAGCATCATCA

>Chrysemys-mir-222b-3p  
AGCTACATCTGATTACTGGGTCA

>Chrysemys-mir-222b-5p  
TGCTCAGTAGTCGGTGTAGGATC

>Chrysemys-mir-223\_pre  
TGTCAGTGTGCGCTCCGTGTATTTGACAAGCTGAGTTTGTGACTCAATGTGGCAGAGTGTGAGTTTGTCAAATACCCCAAGTGAAGCATTTGCTT

>Chrysemys-mir-223-3p  
TGTCAGTTTGTCAAATACCCCA

>Chrysemys-mir-223-5p  
CGTGTATTTGACAAGCTGAGTTT

>Chrysemys-mir-301a\_pre  
TGCTGCTAACGAATGCTCTGACTTTTATTGCACTACTGTACTTTACAGCTAGCAGTGAATAGTATTGTCAAAGCATCTGAAAGCAGAG

>Chrysemys-mir-301a-3p  
CAGTGAATAGTATTGTCAAAGC

>Chrysemys-mir-301b\_pre  
CTGCTGGTATCGCTGGCTCTGACAATGTTGCACTACTGTCTGCACAAATAAAGCAGTGAATAAATATTGTCAAAGCATTTGGTTCCAGTC

>Chrysemys-mir-301b-3p  
CAGTGAATAAATATTGTCAAAGC

>Chrysemys-mir-302a\_pre  
AGCTTAAAGGACCCCCACTACTTTAATGTGGAAGTACTTGTCTTGTCTCCTGATAAAGTAAGTGTCTCCATGTTTTAGTGATGGTGAAACCTG

>Chrysemys-mir-302a-3p (predicted)  
TAAGTGTCTCCATGTTTTAGTG

---

>Chrysemys-mir-302b\_pre  
CCCCTTCTACTTTTAACATGGAGGTGCTTTCTGTGACTATAAAAAAGTAAGTGCTTCCATGTTTTAGTAGAGGTGAATCCTGATCT  
>Chrysemys-mir-302b-3p  
TAAGTGCTTCCATGTTTTAGTAG

>Chrysemys-mir-302c\_pre  
TTAAAGGACCCCTTTGCTTTAACATGGGGGTACCTGCTGCCTAGAAAAAGTAAGTGCTTCCATGTTTCAGTCGTGGTGG  
>Chrysemys-mir-302c\_3p (predicted)  
TAAGTGCTTCCATGTTTCAGT

>Chrysemys-mir-302d\_pre  
CCCCTTCTACTTTAACATGGAAGTACTTGTGGATGCTTGAAAAAGTAAGTGCTTCCATGTTTTAGTTGTGGTGAATCCT  
>Chrysemys-mir-302d-3p  
TAAGTGCTTCCATGTTTTAGTT

>Chrysemys-mir-338a\_pre  
GCTTCTCCTCCCAACAATATCCTGGTGCTGAGTGAGTTGCACACGGAGACTCCAGCATCAGTGATTTTTGTTGAAGAGGGCGAGC  
<Chrysemys-mir-338a-3p  
TCCAGCATCAGTGATTTTTGTTGA  
>Chrysemys-mir-338a-5p  
AACAATATCCTGGTGCTGAGT

>Chrysemys-mir-338b\_pre  
TGCAAATGTTTTATTTCTGGCAACACTATCCTGATGCTGTGAGATATGTGGTAAAGCTCCAGCATCAGTGATTTTTGTTGTTAGTGGTAAATTCAA  
>Chrysemys-mir-338b-3p  
TCCAGCATCAGTGATTTTTGTTGT  
>Chrysemys-mir-338b-5p  
AACACTATCCTGATGCTGTCAGA

>Chrysemys-mir-363\_pre  
TGTTTTGCTGTTGTGCGGGTGGATCACGATGCAATTTTTGATTAGTTTAGCAGGAGAAAAATTGCACGGTATCCATCTGTAAACCGCAGGACC  
>Chrysemys-mir-363-3p  
AATTGCACGGTATCCATCTG  
>Chrysemys-mir-363-5p  
GTGGATCACGATGCAATTTTGA

>Chrysemys-mir-365-1\_pre  
TACCGCAGGGAAAATGAGGGACTTTTGGGGGCAGATGTGTTTTCCATTACACTATCATAATGCCCTAAAAATCCTTATTACTCTTGCAGTATT  
>Chrysemys-mir-365-1-3p  
TAATGCCCTAAAAATCCTTA

>Chrysemys-mir-365-2\_pre  
AGAGGCAGCAAGAAAAATGAGGGACTTTTCCAGGGCAGCTGTGTTTTACTAACCCAGTCATAATGCCCTAAAAATCCTTATTGTTCTTGCAATGTT  
>Chrysemys-mir-365-2-3p  
TAATGCCCTAAAAATCCTTA  
>Chrysemys-mir-365-2-5p  
AGGGACTTTTCCAGGGCAGCTGTG

>Chrysemys-mir-367\_pre  
TCTTAAACTGCAGGCCACTACTGTTGCTAATATGCAACTCTGTTGTGTAAAAGCTGGAATTGCACCTTTAGCAATGGTGATGGACTGTAAGACATAC  
>Chrysemys-mir-367-3p (predicted)  
AATTGCACCTTTAGCAATGGTG

>Chrysemys-mir-375\_pre  
AGCAACCTCTGCACCTTGCTGGCGTCGAGCCCCACGTGCAAGACCTGACGTGAACGTTTTGTTTCGTTTCGGCTCGCGTTAGGCAGGTCCAGCCTGTC  
>Chrysemys-mir-375-3p  
TTTTGTTTCGTTTCGGCTCGCGTTA

---

>Chrysemys-mir-383\_pre  
AAGTCACCTGCTCCTCAGATCAGAAGGTGATTGTGGCTTTGAGTAGATATTAAGCAGCCACAGCACTGCCTGGTCAGAAAGAGCAAGTGTACT  
>Chrysemys-mir-383-5p  
AGATCAGAAGGTGATTGTGGCT

>Chrysemys-mir-425\_pre  
TGGCGAGAAATTGCTTTGGAATGACACGATCACTCCCCTGAGCAAGCAGCCAGAGCCATCGGGAATATCGTGTCCGTCCAAAGCTTTTTTCGGCA  
>Chrysemys-mir-425-5p  
AATGACACGATCACTCCCCTGAG  
>Chrysemys-mir-425-3p  
CCATCGGGAATATCGTGTCCGT

>Chrysemys-mir-429\_pre  
TGCCTGCTGATTGATGTCTTACCAGACAAAGTTAGATCTAGCTATTTTTCGTCTAATACTGTCTGGTAATGCCGTCCATCGCATTGGCTAA  
>Chrysemys-mir-429-3p  
TAATACTGTCTGGTAATGCCGT  
>Chrysemys-mir-429-5p  
NATGACACGATCACTCCCCTGAG

>Chrysemys-mir-449a\_pre  
GTGTGTGCTAGGAAGGCAGTGTATTGTTAGCTGGTTGAAAATCTGACAGCAGCTAACCTACATCTGCTATCTTATTGCACATACTA  
>Chrysemys-mir-449a-5p  
AGGCAGTGTATTGTTAGCTGG  
>Chrysemys-mir-449a-3p  
CAGCTAACCTACATCTGCTATC

>Chrysemys-mir-449b\_pre  
TGTGTCTGGTAGGCAGTGTACTGTTAGCTGGCTGCTTTGTGTGAATCTAGCAGTCTCTACTACACTGTCACCTGCTGCAGG  
>Chrysemys-mir-449b-5p (predicted)  
AGGCAGTGTACTGTTAGCTGGCT

>Chrysemys-mir-449c\_pre  
GATGTGACAGTTTGGCAGTGCCTTGCTAGCTGGCTGTTGAGAACTTGATATATGAACAGTTGCTAGCTGCACTCCACATTGTTGCATTCC  
>Chrysemys-mir-449c-5p  
TGGCAGTGCCTTGCTAGCTGGCT

>Chrysemys-mir-449d\_pre  
TGTGTATGTGCTGATTAGGCAGTGTATTGTTAGTTAGCTGTTGTTTCACATACCAGCAACTAAATACGCTTCCACATTAGCACACGACCTTGCAT  
>Chrysemys-mir-449d-5p  
AGGCAGTGTATTGTTAGTTAGC

>Chrysemys-mir-451\_pre  
AGCTGAGCCCATGGGGCGTCAATGAAACCGTTACCATTACTGACTTTAGTAATGGTAACGGTTCTACTGCCGCCCCAGCATCCGGCCAGCGA  
>Chrysemys-mir-451-5p  
AAACCGTTACCATTACTGACTT  
>Chrysemys-mir-451-3p  
TTAGTAATGGTAACGGTTCT

>Chrysemys-mir-454\_pre  
CCTTAAGGAAGAGACCCTATCAATATTGCCTCTGCTTTTGTGATCAGGGTAGTAGTGAATATTGCTTATAGGGTCTTTTCTTTGGAGGGT  
>Chrysemys-mir-454-3p  
TAGTGAATATTGCTTATAGGGTCT  
>Chrysemys-mir-454-5p  
ACCCTATCAATATTGCCTCTGC

>Chrysemys-mir-455\_pre



---

```
TCCCTGGTGTGAGGGTATGTGCCCTTGGACTACATCGTGGAAGCCAGCACCATGCAGTCCATGGGCATATACACTTGCCTCAAGGTTTAT
>Chrysemys-mir-455-5p
TATGTGCCCTTGGACTACATCG
>Chrysemys-mir-455-3p
ATGCAGTCCATGGGCATATAC

>Chrysemys-mir-456_pre
TGTATGTGTGAGCAGGCATCTTTTCAGCCTACATGTGGATTCCCTAAATCTGCAGGCTGGTTAGATGGTTGTCATACGTTTCATCTG
>Chrysemys-mir-456-3p
CAGGCTGGTTAGATGGTTGTC

>Chrysemys-mir-458_pre
TGCATGGTGCAGATGGCAGCGCCATTTTCAGAGCTATAAACAGTATCATTGTCATAGCTCTTTGAATGGTACTGCCATATGTACTGGAGAATCA
>Chrysemys-mir-458-3p
ATAGCTCTTTGAATGGTACTGC
>Chrysemys-mir-458-5p
AGCGCCATTTTCAGAGCTATAA

>Chrysemys-mir-459_pre
ACTGTTTCTTGTAATCAGTAACAAGGATTCATCCTTGTGTATAGTAAATAACAGGGAGAATCTTTGTCACTAAGTACAATTAACAGCTAT
>Chrysemys-mir-459-3p
GGGAGAATCTTTGTCACTAAG
>Chrysemys-mir-459-5p
TCAGTAACAAGGATTCATCCT

>Chrysemys-mir-460a_pre
CTGACTTTATAGAACCTGCATTGTACACACTGTGTGTATTGATTGGACATGCACAGCGCATAACAATGTGGATACTGTAGACGTCAAT
>Chrysemys-mir-460a-5p
CCTGCATTGTACACACTGTGTG
>Chrysemys-mir-460a-3p
CACAGCGCATAACAATGTGGAT

>Chrysemys-mir-460b_pre
TGGCTCTATGTTGTCCTCATTGTACATGCTGTGTGTATTTTTATTACATACACAGCGCATGCAATGTGGACATAATGGAGATCA
>Chrysemys-mir-460b-5p
TCCTCATTGTACATGCTGTGTG

>Chrysemys-mir-489_pre
GTGGTGGCTTGGTGGTTCGTATGTATGACGTCATTTACTTGGACTTTTAGGAGTGACATCATATGTACGGCTGCTAAACTGCTGCATGGGAC
>Chrysemys-mir-489-3p
GTGACATCATATGTACGGCTGCT
>Chrysemys-mir-489-5p
TGGTCGTATGTATGACGTCATT

>Chrysemys-mir-490_pre
TCATAAGTTTCATGGTTTCGACACCATGGATCTCCAGGTGGGTCAAGATTATAGAGATACACCAACCTGGAGGACTCCATGCTGTTGAGCTGTTTACA
>Chrysemys-mir-490-3p
CAACCTGGAGGACTCCATGCTGT
>Chrysemys-mir-490-5p
CCATGGATCTCCAGGTGGGT

>Chrysemys-mir-499_pre
TTGGGAGAGCGGCAGTTAAGACTTGCAGTGATGTTTAGATAATGTATTACATGAACATCACTTTAAGTCTGTGCTACCTCTCTCCTCACTCTGGAC
>Chrysemys-mir-499-5p
TTAAGACTTGCAGTGATGTTTA
>Chrysemys-mir-499-3p
AACATCACTTTAAGTCTGTGCT
```

---

>Chrysemys-miR-551-1\_pre  
TTTCCTGTATATGACCTTGGAAATCAAGAATGGGTGGAGCCTGTTGAATTAATTTCTAGGCGACCCATACTTGGTTTCAAGGGTCAGCAGGGAA  
>Chrysemys-miR-551-1-3p  
GCGACCCATACTTGGTTTCAG  
>Chrysemys-miR-551-1-5p  
GAAATCAAGAATGGGTGGAGCCT

>Chrysemys-mir-551-2\_pre  
CCTCCATGGCTCCAGAAATCAAGGGTGGGTGAGACCTCGTAAGAAAACGTGAAGGCGACCCATACTTGGTTTTCAGGGGCTGTGAGGA  
>Chrysemys-mir-551-2-3p  
GCGACCCATACTTGGTTTCAG

>Chrysemys-mir-599\_pre  
ATACTGTCAATAGTGTGTTTGGATAACCTGATGTGGGACAGGAGTTCTTTTCACTGTTGTGTGTCAGTTTATCAAACCTGGAAGCCCCTGC  
>Chrysemys-mir-599-3p (predicted)  
GTTGTGTCAGTTTATCAAACCC

>Chrysemys-mir-726\_pre  
TGGGGCGTTCACCAGGAATTCGCTAGTTCTGAACTATTTACACTTGAAAAAGTTCACTACTAGCAGAACTCGGGTGCGCGCCCCC  
>Chrysemys-mir-726-3p  
TTCCTACTAGCAGAACTCG

>Chrysemys-mir-727\_pre  
TTGCCCTGTATGTCATTTTTTTCAGTCTTCAATTCCTCCCAGCCCATTAATGGAAAGTTGAGGCGAGTTGAAGACTAAAAATGCTGTGCAGAATCA  
>Chrysemys-mir-727-3p  
TTGAGGCGAGTTGAAGACTAAA

>Chrysemys-mir-737\_pre  
CTACTCTGCTGTTATTTTTTTAGGTTTTGATTTTTTATTACATCTTCATGCGAAAAATCAAACCTAAAGAAAAATGCTGCAAAGATAGAT  
>Chrysemys-mir-737-5p  
ATTTTTTTTAGGTTTTGATTTTT

>Chrysemys-mir-875\_pre  
GTTTGTAGTGGTACAATACCTCAGTCTTATCAGGTGTTCTATAAAATTCACCTGCAAAAACTGAGGTTGAGTTTCACTGAAC  
>Chrysemys-mir-875-5p  
AATACCTCAGTCTTATCAGGT

>Chrysemys-mir-1306\_pre  
TGAACAGCCTCCACCACCTCCCCTGCAAACGTCCAGTGACGCAGAGGTAATGGACGTTGGCTCTGGTGGTGATGGACAGTCAGAT  
>Chrysemys-mir-1306-5p  
CCACCTCCCCTGCAAACGTCCA  
>Chrysemys-mir-1306-3p  
TGGACGTTGGCTCTGGTGGTGAT

>Chrysemys-mir-1329\_pre  
CAGTCTGGTTGTAGGGATACAGTGATCAGGTTACGAGGGATTTCTCAAGTAACAACCTCGTAGCTCGGTCACGATATCCCTATGACTTAGATAACA  
>Chrysemys-mir-1329-5p  
TACAGTGATCAGGTTACGAGG

>Chrysemys-mir-1388\_pre  
GTGAGGGGTGTTTCGAGGACTGTCTAACCTGAGAATGGTGAAACATGAAGGTCAATCTCAGGTTTCGTTCAGCCCATGAGACGCCTTCTCCAGA  
>Chrysemys-mir-1388-5p  
AGGACTGTCTAACCTGAGAAT  
>Chrysemys-mir-1388-3p  
ATCTCAGGTTTCGTTCAGCCCAT

---

>Chrysemys-mir-1397\_pre  
TGCGATGTGTGCATTGCATTGCGACGGGTTACATCACTGGTCGTAACATGATGTAACCCAACGCAGCATGATGTAAGCGTCGTG

>Chrysemys-mir-1397-5p  
TGCATTGCGACGGGTTACATCA

>Chrysemys-mir-1416\_pre  
GATGGATGACACCTCCTTAACTCATGCCGCTGTGCCTTTTACCCCCACTCCCACAATTGTATGAGTTGAGTACAGAGTATCAGACT

>Chrysemys-mir-1416-5p (predicted)  
TCCTTAACTCATGCCGCTGTG

>Chrysemys-mir-1641\_pre  
AGGGCATTTCCTGGGGATTAATGACTGTCTGGGGTCATCATCTCCTCCCAGTTAGTTATTAGTCCCCCAGGAAATACTGTGTGCCTT

>Chrysemys-mir-1641-5p (predicted)  
TGGGGATTAATGACTGTCTGGG

>Chrysemys-mir-1662\_pre  
TGTGCTCTATGGGTTTGACATCATCATACTTGAGATGTATGACACAAAGTCCCAAGCAGGCTGATGTCAGGCCCAAGATGGCTG

>Chrysemys-mir-1662-5p  
TTGACATCATCATACTTGAGAT

>Chrysemys-mir-1662-3p  
CCCAAGCAGGCTGATGTCAGG

>Chrysemys-mir-1677a\_pre  
GTCTGGATGGGGCCTGATTTCAGATCCCATTGAAGTCAATGAGAATATTTTCATTTGAGCTACTGACTTCAGTGGGCTTTGGTTTCAGACCCACAGTCA

>Chrysemys-mir-1677a-5p  
TCAGATCCCATTGAAGTCAATGG

>Chrysemys-mir-1677a-3p  
CTGACTTCAGTGGGCTTTGGTT

>Chrysemys-mir-1677b\_pre  
AGCAACTAAGAGCCTGGTCCAGAGCCCATTGAAGTCAGTGGGAGATGTTCTAATGACTCCAGAGGGCTTTGGATCAGGCCCTAAGTTAATCCAC

>Chrysemys-mir-1677b-5p  
TCCAGAGCCCATTGAAGTCAGT

>Chrysemys-mir-1677b-3p  
TGACTCCAGAGGGCTTTGGATC

>Chrysemys-mir-1677c\_pre  
CCTCTTCAAGGCCTAATCCAGAGCCCATTGAAGTCAGTGGGAATCTTTCTATTGACTTCAGTGGGCTTTGGATCAGGCCCTTGGGAGCT

>Chrysemys-mir-1677c-5p  
TCCAGAGCCCATTGAAGTCAGT

>Chrysemys-mir-1677c-3p  
ATTGACTTCAGTGGGCTTTGGA

>Chrysemys-mir-1677d\_pre  
GTGTTTTGTGGCCTGATCCAAAGCCCATTGAAGTCAACTGAAGTTTTTGTACTGACTTCAGGTGCTTTGAATCAAATCCCCTATTACAGT

>Chrysemys-mir-1677d-5p  
TGATCCAAAGCCCATTGAAGTCA

>Chrysemys-mir-1677d-3p  
ACTTCAGGTGCTTTGAATCA

>Chrysemys-mir-1677e\_pre  
AATGCTCCCTCTAGGCTCTGATCCAAACCCATTGAAATCAAAGGAAAAATTCCAATGGGCTTTGAATCAGGTCTGAGTGATGCCTCA

>Chrysemys-mir-1677e-5p  
TCTGATCCAAACCCATTGAAAA

>Chrysemys-mir-1677e-3p  
TTCCAATGGGCTTTGAATCAGGT

---

>Chrysemys-mir-1677f\_pre  
TACTGTGATACCAATAAATGACCATGTGAAGTTGATGGGAGTCTTTCCATTGACTTCAGTGGGCTTTGGATCAGGTCTGTGTTGGTAAGGGGGAA  
>Chrysemys-mir-1677f-3p  
ATTGACTTCAGTGGGCTTTGGA

>Chrysemys-mir-1677g-1\_pre  
CACTTAGTCTGAAGGTGAAATCCTGGCTCTGTTGATGTCTATAGAAGTTTTACCATTGACTTCAGTAGAATCAGGATTTCTCCCTCATGAGTGT  
>Chrysemys-mir-1677g-2\_pre  
GTATAGCTGTTGAGCTGAATCCTGGTTCCACTGAAATAATGGTAGTTTTGTGCGTTGACTTCAGTAGAATCAGGATTTGGCTCATAATTAGCTGTG  
>Chrysemys-mir-1677g-3p  
TGACTTCAGTAGAATCAGGATT

>Chrysemys-mir-1677h\_pre  
TCTGGGGCTCAACTGCTCTCCCAATTAAGTCAGTTGGACTTTTTGATTTTTGACTAAATTTGGGAGAAGGGTTGAGTCTCTG  
>Chrysemys-mir-1677h-5p  
AACTGCTCTCCCAATTAAGTCA  
>Chrysemys-mir-1677h-3p  
ACTAAATTTGGGAGAAGGGTTGA

>Chrysemys-mir-1720\_pre  
TTCTGATCACCTCAGTTGTTGCTTTTTGTGAGGATCTCAAGAGAAAGCAATGAGAGGGTGGGTCTGAAACCCA  
>Chrysemys-mir-1720-3p (predicted)  
AAGCAATGAGAGGGTGGGTCTGA

>Chrysemys-mir-1784\_pre  
ATTTCTTAGGGCCCAATTCTGCTCTCATTCAAATCAATGAGAGTTCTACCATTGACTTAACTGGGAGCACAAATTTGGGACCTAAGA  
>Chrysemys-mir-1784-3p (predicted)  
TGACTTAACTGGGAGCACAAAT

>Chrysemys-mir-1788\_pre  
CCCTCTGTGTGTCGGGCTTGTTTTTAGTTGCCTGCGGTTGGTTAGAAGGACTCAGGCAGCTAAAGCAAGTCTGGGACGCGGAGGAGAAC  
>Chrysemys-mir-1788-5p  
GGCTTGTTTTAGTTGCCTGC  
>Chrysemys-mir-1788-3p  
CAGGCAGCTAAAGCAAGTCTG

>Chrysemys-mir-1791\_pre  
TGCACCATGTTGGGCTGCATCAGTCATGCCATGTTATGAAACCTAACACGATGTGACTGATGCAGGCTGACATGA  
>Chrysemys-mir-1791-5p (predicted)  
TGGGCTGCATCAGTCATGCCAT

>Chrysemys-mir-1805\_pre  
AGTGGAATATTCTGGGAGTTGTAGTCTTTCAAACAGAGCTCTGCAAGTATATACCTGTATTGGAACACTACAGCTCCCCGAACTTCTTAGTGTC  
>Chrysemys-mir-1805-5p  
AGTTGTAGTCTTTCAAACAGA  
>Chrysemys-mir-1805-3p  
TGTATTGGAACACTACAGCTC

>Chrysemys-mir-2184\_pre  
GCCCTTGGGTTTCCCCAAACAGTAAGAGTTTTATGTGCGGTGAGAGCTAGAATCTGCATGTGGACTCCTACTGCTCCGGGAGGCTGGAAGTACCA  
>Chrysemys-mir-2184-5p  
AACAGTAAGAGTTTTATGTGCGG  
>Chrysemys-mir-2184-3p  
GCATGTGGACTCCTACTGCTCC

>Chrysemys-mir-2188\_pre  
AATATCAAACCTGTGGGAAAGGTCCAACCTCACATGTCTGTATGTAATAAAGGGGATGTATGTGGTCAGACCTATCCCACAGGCCCTGTATTCTT

---

>Chrysemys-mir-2188-5p  
AAGGTCCAACCTCACATGTCCT  
>Chrysemys-mir-2188-3p  
GATGTATGTGGTCAGACCTAT

>Chrysemys-mir-2970\_pre  
GGTCTCTTCCTGTCACTGCAGACAGTCAGTAGTTGGTCTGGCGAGAGCAGGAATTCTCAGATCACCTCTTGGCTGTGAGTGGTGGTGCAGAGAACA  
>Chrysemys-mir-2970-5p  
GACAGTCAGTAGTTGGTCTG  
>Chrysemys-mir-2970-3p  
TCAGATCACCTCTTGGCTGTGAG

>Chrysemys-mir-2984\_pre  
CTACAGCAGATCCTGTTGAGAGTAAAACTAACAAAGGATCATGCAATCCCAGGCAATTTCACTCACAGCAGGCATTGTAAGTAAAGCA  
>Chrysemys-mir-2984-3p (predicted)  
AATTTCACTCACAGCAGGCATT

>Chrysemys-mir-3064\_pre  
TTTATTTTTGATTTGGCTGTTGTGGTGTGCAAACTTTGTACATTGCTTTTTTGCCACACTGCAACACTTTACAGATGTGGAAGATGTG  
>Chrysemys-3064-3p (predicted)  
TGCCACACTGCAACACTTTAC

>Chrysemys-mir-3618\_pre  
GAATGCATTGTGATTTCCAATAATTGAGACAGTGATTCTGAAAGCTGTCTACATTAATGAAAAGAACAATGTAGTCA  
>Chrysemys-mir-3618-3p (predicted)  
TGTCTACATTAATGAAAAGAAC

>Chrysemys-novel-1\_pre  
TTGTTCTGTCTCTGTTTTGGGACACAAGCAGAGCATCTGCATGACCTTCTCTACCTCATGCTCTGCCTGTGTCCCAAAATAGGCAGAACATC  
>Chrysemys-novel-1-5p  
TGGGACACAAGCAGAGCATCTG  
>Chrysemys-novel-1-3p  
CATGCTCTGCCTGTGTCCAAA

>Chrysemys-novel-2\_pre  
TGTGGTAGTGATGGTGAAAGTGCTAGCGTAGAAACGGCAGATGCTTTTCATGCTCTCTTTGCTAGCGCTTCCACCAAGGTTACCACT  
>Chrysemys-novel-2-5p  
AAAGTGCTAGCGTAGAAACGG  
>Chrysemys-novel-2-3p  
CTCTCTTTGCTAGCGCTTCCA

>Chrysemys-novel-3\_pre  
TCTGGAGCTGATCCTGAAGCCCTTACTCACATGAGCAGTCCCACATAAGTCCTCAAGGTGAGTAAGGGCTGCGAGATTGGACCCCTAAATACC  
>Chrysemys-novel-3-5p  
AAGCCCTTACTCACATGAGCA  
>Chrysemys-novel-3-3p  
CTCAAGGTGAGTAAGGGCTGCG

>Chrysemys-novel-6\_pre  
TCTGTGGGTATGCATACGCTATGGGGACAATACTGGCATAGCTTTAGCACCCCTAGCTATGCCGGCATAGCCCCATGGTGTGTAGACTCACCAA  
>Chrysemys-novel-6-5p  
TATGGGGACAATACTGGCATAG  
>Chrysemys-novel-6-3p  
TATGCCGGCATAGCCCCATGGT

>Chrysemys-novel-7\_pre  
TTCCGGGGCCAGCGCTCGGCTGGCGTACGTTGGCGTTGCTCCATTGAAGCCAGCAGCTACGCCGACGTGAGCCAGCTGATGCTCTGGCCCTCGG

---

>Chrysemys-novel-7-5p  
GGCTGGCGTACGTTGGCGTTGC  
>Chrysemys-novel-7-3p  
TACGCCGACGTGAGCCAGCTGA

>Chrysemys-novel-9\_pre  
GCATTGCCCTGCATCTTGTGTAGTTCTTTTAGCATTTTCTACCCATTTTGCACAGATGTAAATAACTACACAAGGTGCAGGGCAGTGGAAAGTG  
>Chrysemys-novel-9-5p  
TCTTGTGTAGTTCTTTAGCAT  
>Chrysemys-novel-9-3p  
GTAAATAACTACACAAGGTGC

>Chrysemys-novel-10\_pre  
GGATGGATGGGAGCCAGCAGTCGGAGAAGAAGAGACGGTGACTAACCTCCGTAACCTTGTTCCTTCGAGATGTTGCTCACGTCCAGTC  
>Chrysemys-novel-10-5p  
CAGCAGTCGGAGAAGAAGAGACG  
>Chrysemys-novel-10-3p  
TAACTTGTTCCTTCGAGATGTTGC

>Chrysemys-novel-11\_pre  
AACCATCTAGAGAGCTGTGACTGTTTAGATGGTCGTGTGGGGTATGCGCACACAGCCTCAGCAGTCACTGCTTTTTTAGATGTTT  
>Chrysemys-novel-11-5p  
CTGTGACTGTTTAGATGGTCGTG  
>Chrysemys-novel-11-3p  
CAGCCTCAGCAGTCACTGCT

>Chrysemys-novel-12\_pre  
CTCCGGAGTTGGGGCACCAGTCGTTGGCGACTCAGGCTCCTCCATGGGAGCAGTACCCTGAGTCGCCAACAAATCGGTGCCTCAACTCGGAGACCT  
>Chrysemys-novel-12-5p  
CACCAGTCGTTGGCGACTCAGG  
>Chrysemys-novel-12-3p  
TGAGTCGCCAACAAATCGGTGCC

>Chrysemys-novel-13\_pre  
GAGACTTGGGCCTTGATCCTGCCATGATCTCTGCAGAAACAAACCCTTGTGGAGCTCATTGCAGGACTGGGACCTTAGTTTTT  
>Chrysemys-novel-13-5p  
TTGATCCTGCCATGATCTCTGCA  
>Chrysemys-novel-13-3p  
TGGAGCTCATTGCAGGACTGGG

>Chrysemys-novel-14\_pre  
TGCATCCGGCCATCCCTCTTACAGCAAAGCACCGAAGCACACGCATCACCTAAAGCGCATGCGTCGGTGCTGCTCAGAAGAGTGGCGGACTGCT  
>Chrysemys-novel-14-5p  
CAGCAAAGCACCGAAGCACACG  
>Chrysemys-novel-14-3p  
GCATGCGTCGGTGCTGCTCAGA

>Chrysemys-novel-16\_pre  
AAAGTTCAAGACTATAACCCTCAGATGTGTCTACTAGTCTGGGCTCAATCACAGATTAGGGGCAACATCTGGGCTAGAGCCTGAGCTAATTC  
>Chrysemys-novel-16-5p  
CCTCAGATGTGTCTACTAGTCT  
>Chrysemys-novel-16-3p  
ATTAGGGGCAACATCTGGGCTA

>Chrysemys-novel-19\_pre  
CTGCAGGCCAGATTCTGCCCTCATTTATACTTGTGTCTTCAATGGGTTTACACAGGTGGAACCGAGGGCAGAATTTAGCCCTGCAA  
>Chrysemys-novel-19-5p

---

TGCCCTCATTTATACTTGTGT  
>Chrysemys-novel-19-3p  
ACAGGTGGAACCGAGGGCAG

>Chrysemys-novel-20\_pre  
TGGGCTGATGTGCAGTGGTGTGAGAACCTGCAGTTCCCATTAACCTTTAGTGAAATCTGGAGATGCTCAGCACTTCTGAACAACAGATCAC  
>Chrysemys-novel-20-5p  
AGTGGTGCTGAGAACCTGCAGT  
>Chrysemys-novel-20-3p  
CTGGAGATGCTCAGCACTTCTGA

>Chrysemys-novel-21\_pre  
AGAGTGTGCGCCCTGATCTTGTAATTGGCTTCACATAGGTGTAAGGGACTGCCTAAGTGGAACCAATTATCGAATCAGTGCCTCAGTACTTA  
>Chrysemys-novel-21-5p  
CTTGTAATTGGCTTCACATAGGT  
>Chrysemys-novel-21-3p  
TAAGTGGAACCAATTATCGAAT

>Chrysemys-novel-22\_pre  
AGGAGTCTGATCCTGCTGACCTTATTCAGACAAAGCTCTTTTTGATTCCAGTAGGATTTTGCCTGAGTAGGGACTGCAGGGTTTGGCCCAC  
>Chrysemys-novel-22-5p  
GACCTTATTCAGACAAAGCTCT  
>Chrysemys-novel-22-3p  
ATTTTGCCTGAGTAGGGACTGC

>Chrysemys-novel-24\_pre  
TCTGGCCTCGGTTACGCTGGTGTAAATCTGGAGTGGATCCCCTGACTTCAGTGGCGTCACTCCGCATTTACATTGCTGTGACTGAGAGCACAAC  
>Chrysemys-novel-24-5p  
TGGTGTAAATCTGGAGTGGATC  
>Chrysemys-novel-24-3p  
CGTCACTCCGCATTTACATTGCT

>Chrysemys-novel-25\_pre  
TTAGGCCATATCCTCAGACAGTGTAAATCGGCATAGCGCTTTTAACTTCAGTGGATCTGTGCTAATTTACATCTGCCGAGGACCTGGCCCAT  
>Chrysemys-novel-25-5p  
ACAGTGTAAATCGGCATAGCGC  
>Chrysemys-novel-25-3p  
TCTGTGCTAATTTACATCTGCCG

>Chrysemys-novel-26\_pre  
CTGCTCTCCTGGCACTCTGCTACACAGCCAGAGCGTCCGTGAGCCACAAGTGGATGTCCC GGCTGTGAGTAGCGTGCAGGGAATGGAGGAAG  
>Chrysemys-novel-26-5p  
TCTGCTACACAGCCAGAGCGTC  
>Chrysemys-novel-26-3p  
TGTCCC GGCTGTGAGTAGCGT

>Chrysemys-novel-27\_pre  
AAGAAGTAACGCTTCTGCTAGTTCCAGCGCAGTCCAGCATGATTAGAAGGGTACTGGACTGGGCTACAAC TAGAAGGAAGTGTGCTGCTT  
>Chrysemys-novel-27-5p  
TGCTAGTTCCAGCGCAGTCCAG  
>Chrysemys-novel-27-3p  
CTGGGCTACAAC TAGAAGGAAG

>Chrysemys-novel-29\_pre  
CTTGGGCCCAGATCCTAAGACGTATTTAGATGCTTAACATTAGATAACCTAAATATCTTTTCAGGATCTGGGCCCTGA  
>Chrysemys-novel-29-5p  
AGATCCTAAGACGTATTTAGA

>Chrysemys-novel-29-3p  
TAAATATCTTTCAGGATCTGG



---

>Alligator-let-7a-1\_pre  
GTGGGATGAGGTAGTAGGTTGTATAGTTTTAGGGTCATACCCACAACCTGGGAGATAACTATAACAATCTACTGTCTTTTCCTAAAGCA

>Alligator-let-7a-1-5p  
TGAGGTAGTAGGTTGTATAGTT

>Alligator-let-7a-1-3p  
CTATAACAATCTACTGTCTTT

>Alligator-let-7a-2\_pre  
ACTGCATGCATCCAGGTTGAGGTAGTAGGTTGTATAGTTTTAGAATGACACCAAGGGAGATAACTGTACAACCTCCTAGCTTTTCCTTGGGTCTTGCA

>Alligator-let-7a-2-5p  
TGAGGTAGTAGGTTGTATAGTT

>Alligator-let-7a-2-3p  
CTGTACAACCTCCTAGCTTTCC

>Alligator-let-7a-3\_pre  
TCCTTTGGGGTGAGGTAGTAGGTTGTATAGTTTTAGGGTTATACCCTGCCTGTGAGATAACTATAACAATCTACTGTCTTTTCCTGAAGTGGC

>Alligator-let-7a-3-5p  
TGAGGTAGTAGGTTGTATAGTT

>Alligator-let-7a-3-3p  
CTATAACAATCTACTGTCTTT

>Alligator-let-7a-4\_pre  
TGGAGGTGAGGTAGTAGGTTGTATAGTTTTGGTGGGAGGGATTTTCATCCCATTTTCAGGTGATAACTATAACAGTCTATTGCCTTCCTTGAAGAG

>Alligator-let-7a-4-5p  
TGAGGTAGTAGGTTGTATAGTT

>Alligator-let-7a-4-3p  
CTATACAGTCTATTGCCTTC

>Alligator-let-7b\_pre  
GCTCTGGCAGGATGAGGTAGTAGGTTGTGTGGTTTTAGGGTAGTGATTTTTGCCCAATCAGGAGATAACTATAACAACCTACTGCCTTCCCTG

>Alligator-let-7b-5p  
TGAGGTAGTAGGTTGTGTGGTT

>Alligator-let-7b-3p  
CTATAACAACCTACTGCCTTCCC

>Alligator-let-7c-1\_pre  
TGTGTGCATCCGGGTTGAGGTAGTAGGTTGTATGGTTTTAGAGTTACACCCTGGGAGTTAACTGTACAACCTTCTAGCTTTTCCTTGGAGCACACT

>Alligator-let-7c-1-5p  
TGAGGTAGTAGGTTGTATGGTT

>Alligator-let-7c-1-3p  
CTGTACAACCTTCTAGCTTTCC

>Alligator-let-7c-2\_pre  
GGGTGGGGGCCGGGTTGAGGTAGTAGGTTGTATGGTTTTAGAGTACACCCCCGGAGATAACTGTACAGCCTCCTAGCTTTCCCCGCGCCCCCA

>Alligator-let-7c-2-5p  
TGAGGTAGTAGGTTGTATGGTT

>Alligator-let-7c-2-3p  
CTGTACAGCCTCCTAGCTTTCC

>Alligator-let-7d\_pre  
TAGGAAGAGGTAGTAGGTTGCATAGTTTTAGGGCAGGGATTTTTGCTCACACGGAGTTAACTATAACAACCTGCTGCCTTTCTTAGGGC

>Alligator-let-7d-5p  
AGAGGTAGTAGGTTGCATAG

>Alligator-let-7d-3p  
CTATAACAACCTGCTGCCTTTC

>Alligator-let-7e\_pre

---

GTCCTTGAGGCTGAGGTAGTAGATTGAATAGTTGTGGAGTCCTACCCTCCCTTTGAGCTAACTATAACAATCTACTGTCTTTCCCTAAGGAGAC  
>Alligator-let-7e-5p  
TGAGGTAGTAGATTGAATAGTT  
>Alligator-let-7e-3p  
CTATAACAATCTACTGTCTTT

>Alligator-let-7f-1\_pre  
CCGGGCGGCGTGGGCTGAGGTAGTAGATTGTATAGTTCTGGGTACACCCGCGCGGAGATAACTATACAGCCTACTGTCTTTCCCTGCGCTGTTCCC  
>Alligator-let-7f-1-5p  
TGAGGTAGTAGATTGTATAGT

>Alligator-let-7f-2\_pre  
TATCAGAGTGAGGTAGTAGATTGTATAGTTGTGGGGTAGTTATTTTACCCTGTTTACAGGAGATAACTATAACAATCTATTGCCTTCCCTGAGGA  
>Alligator-let-7f-2-5p  
TGAGGTAGTAGATTGTATAGT  
>Alligator-let-7f-2-3p  
CTATAACAATCTATTGCCTTCC

>Alligator-let-7g\_pre  
GCCTGATTCCAAGCTGAGGTAGTAGTTTGTACAGTTTGGGGTCTATGATACCACCCGGTACAGGAGATTAAGTGTACAGGCCACTGCCTTGCCTG  
>Alligator-let-7g-5p  
TGAGGTAGTAGTTTGTACAGTT  
>Alligator-let-7g-3p  
CTGTACAGGCCACTGCCTTGCT

>Alligator-let-7i\_pre  
CGGTCCTGGCTGAGGTAGTAGTTTGTGCTGTTGGTTCGGGTTGTGACACTGCCCCGTGTGGAGATAACTGCGCAAGCTACTGCCTTGCTAGTGCG  
>Alligator-let-7i-5p  
TGAGGTAGTAGTTTGTGCTGTA  
>Alligator-let-7i-3p  
CTGCGCAAGCTACTGCCTTGCTT

>Alligator-mir-1a-1\_pre  
GAAACTACCTGCTTGAGAGACATACTTCTTTTATATGCCCATATGAACCTGGCAAGCTATGGAATGTAAAGAAGTATGTATTTTTCAGGTGGGGATCAT  
>Alligator-mir-1a-1-3p  
TGGAATGTAAAGAAGTATGTA  
>Alligator-mir-1a-1-5p  
ACATACTTCTTTATATGCCCATAT

>Alligator-mir-1a-2\_pre  
ACCTGCCCAGAGTACATACTTCTTTTATGTACCCATATGAACATACAATGCTATGGAATGTAAAGAAGTATGTATTTTTTGGCAGGCAC  
>Alligator-mir-1a-2-3p  
TGGAATGTAAAGAAGTATGTAT  
>Alligator-mir-1a-2-5p  
ACATACTTCTTTATGTACCCATA

>Alligator-mir-1b\_pre  
TCCCTCCCAACCCTACATACTTCTTTCATATGCCCATATGGAGTCGGCTGGTATTATGGAATGTTAAGAAGTATGTATCTTTGGGCTGGGAC  
>Alligator-mir-1b-3p  
TGGAATGTTAAGAAGTATGTAT  
>Alligator-mir-1b-5p  
TACATACTTCTTTCATATGCCCA

>Alligator-mir-7a-1\_pre  
TGGTCTAGTTCTGTGTGGAAGACTAGTGATTTTGTGTTTTTAGATAACTAAATCGACAACAAATCGCAGTCTGCCATATGGCACAGACCA  
>Alligator-mir-7a-1-5p  
TGGAAGACTAGTGATTTTGTGTT

---

>Alligator-mir-7a-1-3p  
AACAAATCGCAGTCTGCCATAT

>Alligator-mir-7a-2\_pre  
CCTGACCCTGTATGGAAGACTAGTGATTTTGTGTTCTATGGCTCATCTCACGACAACAAGTCACAGTCTGCCTTATGGTGCATGGCCT  
>Alligator-mir-7a-2-5p  
TGGAAGACTAGTGATTTTGTGTTGT  
>Alligator-mir-7a-2-3p  
CAACAAGTCACAGTCTGCCTTT

>Alligator-mir-7a-3\_pre  
GTCGTCTGGCTCTGCGTGGAAGACTAGTGATTTTGTGTTCTGACTTATAAAGGTGACAACAAATCATAGCCTGCCATACAGCACAGACTCGCA  
>Alligator-mir-7a-3-5p  
TGGAAGACTAGTGATTTTGTGTTGT

>Alligator-mir-7b\_pre  
GCCTGGGTCGGTCTGGAAGACTTGTGATTTTGTGTTTCTGGTGTCAAGGAAGCGAACAACAAATCCCAGTCTCCTCACAGCCCCAGGGCCAGTC  
>Alligator-mir-7b-5p  
TGGAAGACTTGTGATTTTGTGTTGT

>Alligator-mir-9-1\_pre  
GGGTTGGTTGTTATCTTTGGTTATCTAGCTGTATGAGTGGTGTCAATTCTTCATAAAGCTAGATAACCGAAAGTAAAAATAACCCCAT  
>Alligator-mir-9-1-5p  
TCTTTGGTTATCTAGCTGTATG  
>Alligator-mir-9-1-3p  
TAAAGCTAGATAACCGAAAGT

>Alligator-mir-9-2\_pre  
GAAGCGAGTTGTTATCTTTGGTTATCTAGCTGTATGAGTGTGTTTGGTCTTCATAAAGCTAGATAACCGAAAGTAAAAACTCCTTCA  
>Alligator-mir-9-2-5p  
TCTTTGGTTATCTAGCTGTATG  
>Alligator-mir-9-2-3p  
TAAAGCTAGATAACCGAAAGT

>Alligator-mir-9-3\_pre  
AGGGCTGTTTCTGTCTTTGGTTATCTAGCTGTATGAGTGTGTTCTCGAGCCGTCATAAAGCTAGATAACCGAAAGTAGAAATGACTT  
>Alligator-mir-9-3-5p  
TCTTTGGTTATCTAGCTGTATG  
>Alligator-mir-9-3-3p  
TAAAGCTAGATAACCGAAAGT

>Alligator-mir-9-4\_pre  
GTGGGTTTTTGTCTTTGGTTATCTAGCTGTATGAGTGTATGTGATATCATAAAGCTAGACAACCGAATGTAAAAACCGGCTCGC  
>Alligator-mir-9-4-5p  
TCTTTGGTTATCTAGCTGTATG  
>Alligator-mir-9-4-3p  
TAAAGCTAGACAACCGAATGT

>Alligator-mir-10a\_pre  
GTCTTCTATATGTACCCTGTAGATCCGAATTTGTGTAAAGGAAGTTGCGTCACAAATTCGTATCTAGGGGAATATGTAGTTGACACAA  
>Alligator-mir-10a-5p  
TACCCTGTAGATCCGAATTTGTG  
>Alligator-mir-10a-3p  
ACAAATTCGTATCTAGGGGAAT

>Alligator-mir-10b\_pre  
CGTTGTCTATATATACCCTGTAGAACCGAATTTGTGTGGTATTCACATAGTCACAGATTCGATTCCTAGGGGAATATATGGTTCGATGC

---

>Alligator-mir-10b-5p  
TACCCTGTAGAACCGAATTTGT  
>Alligator-mir-10b-3p  
ACAGATTCGATTCTAGGGGAAT

>Alligator-mir-10c\_pre  
CACAGTCGCCTATATGTACCCTGTAGAATCGAATTTGTGTGAACATTTTCAGAGTCACAAATTCGTCTCTAGGGGAATATATGGACGATGC  
>Alligator-mir-10c-5p  
ACCCTGTAGAATCGAATTTGTG  
>Alligator-mir-10c-3p  
ACAAATTCGTCTCTAGGGGAA

>Alligator-mir-15a\_pre  
TACCTTGGCCTAACGTAGCAGCACATAATGGTTTGTGGATTTTGTAAAAGGTGCAGGCCATATTGTGCTGCCTCAAAAATAC  
>Alligator-mir-15a-5p  
TAGCAGCACATAATGGTTTGTG  
>Alligator-mir-15a-3p  
CAGGCCATATTGTGCTGCCTC

>Alligator-mir-15b\_pre  
ACCTTAAATTACTCTAGCAGCACATCATGGTTTGCATGATCTTGTAAAGATGCTAATCATTATTTGCTGCTTTAGGAATTTAAGGA  
>Alligator-mir-15b-5p  
TAGCAGCACATCATGGTTTGTGCA  
>Alligator-mir-15b-3p  
CTAATCATTATTTGCTGCTTT

>Alligator-mir-15c\_pre  
CTTTGAGGAGATGTAGCAGCACATCATGGTTTGTAGGGACAAGGAGATACAGACCATTCTGGGCTGCCTCATTACCTCAAGG  
>Alligator-mir-15c-5p  
TAGCAGCACATCATGGTTTGTGTA  
>Alligator-mir-15c-3p  
CAGACCATTCTGGGCTGCCTCATT

>Alligator-mir-16a-1\_pre  
ATGTCAATCGTACCTTAGCAGCACGTAAATATTGGTGTAAAGATTCTGTAAATATCTCCAGTATTAAGTGTGCTGCTGAAGTAAGTTTGGCCT  
>Alligator-mir-16a-1-5p  
TAGCAGCACGTAAATATTGGTG  
>Alligator-mir-16a-1-3p  
CCAGTATTAAGTGTGCTGCTGA

>Alligator-mir-16a-2\_pre  
CTATACTTGTTCGCCCTAGCAGCACGTAAATATTGGTGTATAAAAAGTAAATCAAACCCCAATATTATTGTGCTGCTTAAGCGTGGCAGA  
>Alligator-mir-16a-2-5p  
TAGCAGCACGTAAATATTGGTG  
>Alligator-mir-16a-2-3p  
CCAATATTATTGTGCTGCTTAA

>Alligator-mir-16b\_pre  
TCAGCAGTGCTCTAGCAGCACGTAAATACTGGAGTCGAGGACTGCCTGGCTGCTCTCCAGTATTGCATTGCTGCTTGAGTGAGGCTGG  
>Alligator-mir-16b-5p  
TAGCAGCACGTAAATACTGGAG  
>Alligator-mir-16b-3p  
TCTCCAGTATTGCATTGCTGCT

>Alligator-mir-17\_pre  
GTCAGAGTAATGTCAAAGTGTCTTACAGTGCAGGTAGTGATATATAGAACCCTACTGCAGTGAAGGCACTTGTAGCATTTATAGTGACAA  
>Alligator-mir-17-5p

---

CAAAGTGCTTACAGTGCAGGTAGA  
>Alligator-mir-17-3p  
CTGCAGTGAAGGCACTTGTAGC

>Alligator-mir-18\_pre  
GCTTTTTGTTCTAAGGTGCATCTAGTGCAGATAGTGAAGTAGATTAGCATCTACTGCCCTAAGTGCTCCTTCTGGCATAAGAAGTT  
>Alligator-mir-18-5p  
TAAGGTGCATCTAGTGCAGATAG  
>Alligator-mir-18-3p  
ACTGCCCTAAGTGCTCCTTCTG

>Alligator-mir-19a\_pre  
TGCAGACTTCTGTTAGTTTTGCATAGTTGCACTACAAGAAGAATGTAGTTGTGCAAATCTATGCAAAACTGATGGTGGCCTGCT  
>Alligator-mir-19a-5p  
TGTGCAAATCTATGCAAAACTG

>Alligator-mir-19b\_pre  
CACTGTTCTCTGGTTAGTTTTGCAGGTTTGCATCCAGCTGTATGATACTCTGCTGTGCAAATCCATGCAAAACTGACTGTGGCAGTG  
>Alligator-mir-19b-3p  
TGTGCAAATCCATGCAAAACTG  
>Alligator-mir-19b-5p  
AGTTTTGCAGGTTTGCATCCAGC

>Alligator-mir-20a\_pre  
GCTCCTGTAGTACTAAAGTGCTTATAGTGCAGGTAGTGTTCAGGAATCTACTGCATTATGAGCACTTAAAGTACTGCTAGC  
>Alligator-mir-20a-5p  
TAAAGTGCTTATAGTGCAGGTAG  
>Alligator-mir-20a-3p  
ACTGCATTATGAGCACTTAAAGT

>Alligator-mir-21\_pre  
CCATCCTGTCGGATAGCTTATCAGACTGATGTTGACTGTTGGATGTCATGGCAACAACAGTCGGTAGGCTGTCTGACATTTTT  
>Alligator-mir-21-5p  
TAGCTTATCAGACTGATGTTGAC  
>Alligator-mir-21-3p  
CAACAACAGTCGGTAGGCTGTC

>Alligator-mir-23a\_pre  
TGCCACAGCCAGCTGGGGTTCCCTGGTGATGCGATTTTTTTTACCCACTGCCCAAAATCACATTGCCAGGGATTTCCAAGTGGCTGCGAGCCC  
>Alligator-mir-23a-3p  
ATCACATTGCCAGGGATTTCCA

>Alligator-mir-23b\_pre  
CCCAGTGTGTGGCTGTTTTGGGTTCCCTGGCATGCTGATTTGTGACTTAAAAATAAAAATCACATTGCCAGGGATTTACCACAGAGCCATGACCATGGC  
>Alligator-mir-23b-3p  
ATCACATTGCCAGGGATTTACCAC  
>Alligator-mir-23b-5p  
GGGTTCCCTGGCATGCTGATTT

>Alligator-mir-24-1\_pre  
TGGATGGACCCGTCTCCAGTGCCTACTGAGCTGATATCAGTTCTGATTTTACATACTGGCTCAGTTTCAGCAGGAACAGGAGTCGAGCCCCA  
>Alligator-mir-24-1-3p  
TGGCTCAGTTTCAGCAGGAACAG  
>Alligator-mir-24-1-5p  
AGTGCCTACTGAGCTGATATCAGT

>Alligator-mir-24-2\_pre

---

TCTGGGCCCTGCCTCCGGTGCCTACTGAGCTGATACTCAGTTGCTTTGGTTTAAACTGGCTCAGTTCAGCAGGAACAGGAGTCTGGCTCCAGCT  
>Alligator-mir-24-2-3p  
TGGCTCAGTTCAGCAGGAACAG  
>Alligator-mir-24-2-5p  
GTGCCTACTGAGCTGATACTCA

>Alligator-mir-26-1\_pre  
AAGGCTGTTACCTGGTTCAAGTAATCCAGGATAGGCTGTATGCATTGCAGTTGGCCTATTCTTGATTACTTGCCTGGGAGACAGCCACA  
>Alligator-mir-26-1-5p  
TTCAAGTAATCCAGGATAGGCT  
>Alligator-mir-26-1-3p  
CCTATTCTTGATTACTTGCCT

>Alligator-mir-26-2\_pre  
CATGGGGTCACGGCCCGTTCAAGTAATCCAGGATAGGCTGGTGCCAGGCCCGTGGCCTATTCTCGATTACTTGTCTCGGGACGTGGCTGCTGGCA  
>Alligator-mir-26-2-5p  
TTCAAGTAATCCAGGATAGGCT  
>Alligator-mir-26-2-3p  
CCTATTCTCGATTACTTGTCTT

>Alligator-mir-27a\_pre  
GAAGCCAGGGCACAGGGCTTAGCTCACCTGTGAACAGAGTTAGCGTTGCATCATGTTACAGTGGCTAAGTTCCGCTCCTGGTGTCTA  
>Alligator-mir-27a-3p  
TTCACAGTGGCTAAGTTCCGC  
>Alligator-mir-27a-5p  
AGGGCTTAGCTCACCTGTGAACA

>Alligator-mir-27b\_pre  
CCTCTCTGACAAGGTGCAGAGCTTAGCTGATTGGTGAACAGTATTGATTTCCCTTTGTTACAGTGGCTAAGTTCTGCACCTGAAGAGAAGGTG  
>Alligator-mir-27b-3p  
TTCACAGTGGCTAAGTTCTG  
>Alligator-mir-27b-5p  
AGAGCTTAGCTGATTGGTGAAC

>Alligator-mir-29a-1\_pre  
CCCTTTAGAGGATGACTGATTTCTTTTGGTGTTCAGAGTCCATACTATTTTCTAGCACCATTTGAAATCGGTTATAGTGATTGGGGAA  
>Alligator-mir-29a-1-3p  
TAGCACCATTTGAAATCGGTTA  
>Alligator-mir-29a-1-5p  
ACTGATTTCTTTTGGTGTTCAGA

>Alligator-mir-29a-2\_pre  
TCTCTTACACAGGCTGACCGATTTCTCTTGGTGTTCAGAGTCTCAGTGTGTTGTCTAGCACCATTTGAAATCGGTTATGATGTAGGGGGA  
>Alligator-mir-29a-2-3p  
TAGCACCATTTGAAATCGGTTA  
>Alligator-mir-29a-2-5p  
TGACCGATTTCTCTTGGTGTTCAG

>Alligator-mir-29b-1\_pre  
CTCCTTCAGGAAGCTGGTTTCATATGGTGGTTTAGATTTAACTACTTATTGTCTAGCACCATTTGAAATCAGTGTCTTGGAGGAAGAAT  
>Alligator-mir-29b-1-5p  
NTGGTTTCATATGGTGGTTTAGA  
>Alligator-mir-29b-1-3p  
TAGCACCATTTGAAATCAGTG

>Alligator-mir-29b-2\_pre  
TGAGTCTTCTCTGGAAGCTGGTTTCACATGGTGGCTTAGATTTTCCCATCTTTGTATCTAGCACCATTTGAAATCAGTGTCTAGGGGCAAGAAT

---

>Alligator-mir-29b-2-5p  
CTGGTTTTCACATGGTGGCTTAGA

>Alligator-mir-29b-2-3p  
TAGCACCATTTGAAATCAGTG

>Alligator-mir-30a\_pre  
CTGTTGACAGTGAGCGACTGTAAACATCCTCGACTGGAAGCTGTGAAGCAGCAGATGGGGCTTTCAGTCGGATGTTTGCAGCTGCCAACTGCCACA

>Alligator-mir-30a-5p  
TGTA AACATCCTCGACTGGAAGCT

>Alligator-mir-30a-3p  
CTTTCAGTCGGATGTTTGCAGC

>Alligator-mir-30b\_pre  
ACTGACTTTTAGTTTCATGTAAACATCCTACACTCAGCTATAACAACCTGGAACGGCTGGGAGGTGGATGTTTACTTCAACTGATTTGAAAAGG

>Alligator-mir-30b-5p  
TGTA AACATCCTACACTCAGCT

>Alligator-mir-30b-3p  
CTGGGAGGTGGATGTTTACTTC

>Alligator-mir-30c-1\_pre  
ATCTACCATGCCGTAGCATGTGTAAACATCCTACACTCTCAGCTGTGAACTCAAGGTGGCTGGGAGAGGGTTGTTTACGCCTTCTGCCATGGTCTG

>Alligator-mir-30c-1-5p  
TGTA AACATCCTACACTCTCAGC

>Alligator-mir-30c-1-3p  
TGGGAGAGGGTTGTTTACGCC

>Alligator-mir-30c-2\_pre  
GCTCTGAGTGACAGGTATTGTAAACATCCTACACTCTCAGCTGTGGAAAATGAGGAAGCTGGGAGAAGGCTGTTTACTCTCCCTGNCTTAGATAGC

>Alligator-mir-30c-2-5p  
TGTA AACATCCTACACTCTCAGC

>Alligator-mir-30c-2-3p  
TGGGAGAAGGCTGTTTACTCT

>Alligator-mir-30d\_pre  
ATGGGAGTCTGTTGTTGTAAACATCCCCGACTGGAAGCTGTAAGAGAAATTTCTAGCTTTCAGTCAGATGTTTGGCTGCCACTGGCTACT

>Alligator-mir-30d-5p  
TGTA AACATCCCCGACTGGAAGCT

>Alligator-mir-30d-3p  
CTTTCAGTCAGATGTTTGGCTG

>Alligator-mir-30e\_pre  
CCTGGGCAGTCGATGCTACTGTAAACATCCTTGACTGGAAGCTGTAAGGTGCTAGAAGGAGCTTTCAGTCGGATGTTTACAGCGGCAGGCTGCCAC

>Alligator-mir-30e-5p  
TGTA AACATCCTTGACTGGAAGCT

>Alligator-mir-30e-3p  
CTTTCAGTCGGATGTTTACAGC

>Alligator-mir-31\_pre  
CAGAGCTAGAGAGGAGGCAAGATGTTGGCATAGCTGTTGACCTAAGAACCTGCTATGCCAACATCTTGTTCATCTTTCTTGTCTAC

>Alligator-mir-31-5p  
AGGCAAGATGTTGGCATAGCTG

>Alligator-mir-31-3p  
TGCTATGCCAACATCTTGTTCAT

>Alligator-mir-32\_pre  
TGCTTGCTCTGGTGGATATATTGCACATTAAGTTGCATGTTGTCACGGCCTCAGTGCAATTTAGTGTGTGCGATATTTTACATGAGTGCAT

>Alligator-mir-32-5p

---

TATTGCACATTACTAAGTTGCA  
>Alligator-mir-32-3p  
CAATTTAGTGTGTGCGATATT

>Alligator-mir-33-1\_pre  
GGGTGACCGCTGTAGTGCATTGTAGTTGCATTGCATGTTCTGGTAGTATCTGTGCAATGTTTCTGCAGTGCAGTATAGAGGCACTCT  
>Alligator-mir-33-1-5p  
GTGCATTGTAGTTGCATTGCA  
>Alligator-mir-33-1-3p  
CAATGTTTCTGCAGTGCAGTA

>Alligator-mir-33-2\_pre  
GCAGTGGCCTCAGCTGTGGTGCATTGTAGTTGCATTGCATGTGTACAGAGGTGTGCAATGCCTCTGCAGTGCAGCCCAGAGGAGGCTCCTCCCAG  
>Alligator-mir-33-2-5p  
GTGCATTGTAGTTGCATTGCA  
>Alligator-mir-33-2-3p  
CAATGCCTCTGCAGTGCAGCT

>Alligator-mir-34a\_pre  
TGTGAGTGTCTTTGGCAGTGTCTTAGCTGGTTGTTGTGAACAATAGACAAGGAAGCAATCAGCAAGTATACTGCCCTAGAAGTGCTGCACA  
>Alligator-mir-34a-5p  
TGGCAGTGTCTTAGCTGGTTGTT  
>Alligator-mir-34a-3p  
GCAATCAGCAAGTATACTGCCCT

>Alligator-mir-34b\_pre  
AGTAGTGTCTTTGGTTTGTAGGCAGTGTAGTTAGCTGATTGTGTGTCAGTCCCTTGGCAATCACTAACTTCACTGCCATCAAAAACAAGGCACAGAAT  
>Alligator-mir-34b-5p  
AGGCAGTGTAGTTAGCTGATTG  
>Alligator-mir-34b-3p  
AATCACTAACTTCACTGCCATC

>Alligator-mir-34c\_pre  
TACCTCAGCCTAGTTGCTAGGCAGTGTAGTTAGCTGATTGCAAAAGGCAACAATCACTAACCACACAGCCAGGTAAAAAGGTCTGTCTTGCA  
>Alligator-mir-34c-5p  
AGGCAGTGTAGTTAGCTGATTG  
>Alligator-mir-34c-3p  
AATCACTAACCACACAGCCAG

>Alligator-mir-92a\_pre  
ACCCCTTTCTACACAGGTTGGGATCAGTTGCAATGCTGTGTGTGTCTGTGGTATTGCACTTGTCCCGGCCTGTTGAGGTTGGTGGGGATA  
>Alligator-mir-92a-3p  
TATTGCACTTGTCCCGGCCTGT  
>Alligator-mir-92a-5p  
AGGTTGGGATCAGTTGCAATGCT

>Alligator-mir-92b\_pre (incomplete)  
TCCGGGGCGGGGAGGGCCGGGATGCGGTGCAGTGTGTGCGTCTCCTACCAATATTGCACT  
>Alligator-mir-92b-3p  
AGGGCCGGGATGCGGTGCAGTGT

>Alligator-mir-93\_pre  
CTTGAGCTGCGGTGGCTCCAAAGTGCTGTTTCGTGCAGGTAGTGTGTGCAGCCATCTACTGCCGGGCAGCACTTCCCGAGCCCCCGCAGCCG  
>Alligator-mir-93-5p  
CAAAGTGCTGTTTCGTGCAGGTAG  
>Alligator-mir-93-3p  
TACTGCCGGGCAGCACTTCCC



---

>Alligator-mir-96\_pre  
GTTCTCTGCTTGGCCATTTTGGCACTAGCACATTTTGGCTTTTGTACGTATACTTTGAGCAATTATGTGTAGTGCCAATATGGGAGGAGATGGAC  
>Alligator-mir-96-5p  
TTTGGCACTAGCACATTTTGGCT  
>Alligator-mir-96-3p  
CAATTATGTGTAGTGCCAATAT

>Alligator-mir-98\_pre  
GGGTGAGGTAGTAAGTTGTATCGTTGGGGGGTCGGGATTGGAGCCCCGGTGTGAGGTAACCTATAACAACCTTACTACTTTCCCT  
>Alligator-mir-98-5p  
TGAGGTAGTAAGTTGTATCGTT  
>Alligator-mir-98-3p  
CTATAACAACCTTACTACTTTCC

>Alligator-mir-99a\_pre  
GTGCCAGTTGGCATAAACCCGTAGATCCGATCTTGTGGTAAAATACACCACACAAGCTCGCTTCTATGGGTCTGTGTCAGTGTGGTTATC  
>Alligator-mir-99a-5p  
AACCCGTAGATCCGATCTTGTG  
>Alligator-mir-99a-3p  
CAAGCTCGCTTCTATGGGTCTG

>Alligator-mir-99b\_pre  
GCCTGCCGGTCGCCATAAACCCGTAGATCCGAACCTTGGGGTCGCTCCTCGTGCAAGCTCGACTCTGTGGGTCTGTGTCGGCCTCGGCCT  
>Alligator-mir-99b-5p  
AACCCGTAGATCCGAACCTTGGC  
>Alligator-mir-99b-3p  
CAAGCTCGACTCTGTGGGTCTG

>Alligator-mir-100\_pre  
TGCCCGTTGCCACAAACCCGTAGATCCGAACCTTGTGGTGATATTCCACACAAGCTTGTATCTATAGGTATGTGTCTTCATGGCAAG  
>Alligator-mir-100-5p  
AACCCGTAGATCCGAACCTTGTG  
>Alligator-mir-100-3p  
CAAGCTTGTATCTATAGGTATG

>Alligator-mir-101-1\_pre  
ACAGGCTGCCCTGGCTCAGTTATCACAGTGCTGATGCTGTCTATTCTAAAGGTACAGTACTGTGATAACTGAAGGATGGCAGCCATCTTAGCTT  
>Alligator-mir-101-1-3p  
TACAGTACTGTGATAACTGAAG  
>Alligator-mir-101-1-5p  
TCAGTTATCACAGTGCTGATGCT

>Alligator-mir-101-2\_pre  
CATGAACTGTCCTTTTTCGGTTATCATGGTACCGGTGCTGTATACGTGAAAGGTACAGTACTGTGATAACTGAAGAATGATGGTGCCATCACA  
>Alligator-mir-101-2-3p  
TACAGTACTGTGATAACTGAAG  
>Alligator-mir-101-2-5p  
TCGGTTATCATGGTACCGGTGCT

>Alligator-mir-103\_pre  
TGTAATATCTCATTGTCTTTGGCTTCTTTACAGTGCTGCCTTGTTCATATGGATCAAGCAGCATTGTACAGGGCTATGAAGACAATGAGTCTTGC  
>Alligator-mir-103-3p  
AGCAGCATTGTACAGGGCTATG

>Alligator-mir-106\_pre  
ATCCCAGGGCTAAAGTGCTTGCAGTGCAGGTAGCTGGCGCTGGCGCTACTGCAGTGTGGGGCTTGCAGCTCTGGGGA

---

>Alligator-mir-106-5p (predicted)  
TAAAGTGCTTGCAGTGCAGGT

>Alligator-mir-107\_pre  
GTATTCTCTTTGCTTTCAGCTTCTTTACAGTGCTGCCTTGTTCATTTATGTCAAGCAGCATTGTACAGGGCTATCAAAGCGGAGAGAGCTGCA  
>Alligator-mir-107-3p  
AGCAGCATTGTACAGGGCTATG  
>Alligator-mir-107-5p  
AGCTTCTTTACAGTGCTGCCTTG

>Alligator-mir-122\_pre  
TACTATCAGAGCTGTGGAGTGTGACAATGGTGTGTTGTGTCCAATCTATCAAACGCCATTATCACACTAAATAGCTACTGTTAGATA  
>Alligator-mir-122-5p  
TGGAGTGTGACAATGGTGTGTTG  
>Alligator-mir-122-3p  
AACGCCATTATCACACTAAA

>Alligator-mir-124-1\_pre  
GGCCCCGCGCCCCCTCTCTGCGTGTTCACAGCGGACCTTGATTTAAATGTCCATACAATTAAGGCACGCGGTGAATGCCAAGAACGGGGCCGCTC  
>Alligator-mir-124-2\_pre  
TTCCCGGGGCTCTCGCCTCTCCGTGTTACAGCGGACCTTGATTTAAATGTCCATACAATTAAGGCACGCGGTGAATGCCAAGAGCGGAGCCGGAAG  
>Alligator-mir-124-3\_pre  
CCAGGCGAGCCCCCTCTCTGCGTGTTCACAGCGGACCTTGATTTAAATGTCCATACAATTAAGGCACGCGGTGAATGCCAAGAGAGGAGCTCACAGC  
>Alligator-mir-124-4\_pre  
TCCGGACCGCGCCTCGGCTCTCCGTGTTACAGCGGACCTTGATTTAAATGTCCACACAATTAAGGCACGCGGTGAATGCCAAGAGAGGGGCGCCCC  
>Alligator-mir-124-3p  
TAAGGCACGCGGTGAATGCCA  
>Alligator-mir-124-5p  
CGTGTTCACAGCGGACCTTGAT

>Alligator-mir-125a\_pre  
CTAGGCCTCCCTCTCGGTCCCTGAGACCCTTATCCTGTGAGGGAGCCAGAGCTCACAGGTGAGGCCTTGGGAAC TGGGCGGGTGGCCCCCCCAC  
>Alligator-mir-125a-5p  
TCCCTGAGACCCTTATCCTGTG

>Alligator-mir-125b-1\_pre  
TTTGTGCGCCCCCTCTCAATCCCTGAGACCCTAACTTGTGATGTTTAGCTTTTAAATCCACGGGT TAGGCTCTTGGGAGCTGTGAGTTGTGCTTTGG  
>Alligator-mir-125b-1-5p  
TCCCTGAGACCCTAACTTGTGA  
>Alligator-mir-125b-1-3p  
ACGGGT TAGGCTCTTGGGAGCT

>Alligator-mir-125b-2\_pre  
GGACTTTTCCTAGTCCCTGAGACCCTAACTTGTGAGGTTTTTTAGCAACAATCACAAGTCAGGCTCTTGGGACCTAGGCGGAGGGGAACCAGC  
>Alligator-mir-125b-2-5p  
TCCCTGAGACCCTAACTTGTGA  
>Alligator-mir-125b-2-3p  
ACAAGTCAGGCTCTTGGGAC

>Alligator-mir-126\_pre  
CGGCCATTATTACTTTTGGTACGCGCTGTGACACTTCAAAC TCGTACCGTGAGTAATAATGCGCTGCGGCCAGCACC  
>Alligator-mir-126-3p  
TCGTACCGTGAGTAATAATGCG  
>Alligator-mir-126-5p  
CATTATTACTTTTGGTACGCG

>Alligator-mir-128-1\_pre

---

```
CATGAGCTGTTGGATTTCGGGGCCGTAACACTGTCTGAGAGGGTTACATTTCTCACAGTGAACCGGTCTCTTTTTTCAGCTGCTTCCTG
>Alligator-mir-128-1-3p
TCACAGTGAACCGGTCTCTTT
>Alligator-mir-128-1-5p
CGGGGCCGTAACACTGTCTGAGA

>Alligator-mir-128-2_pre
TGTGCAGTTGGAAGGGGGCCGTTACACTGTAAGAGAGTGAGTAGCAGGTCTCACAGTGAACCGGTCTCTTTTTCTACTGTGTCGTGT
>Alligator-mir-128-2-3p
TCACAGTGAACCGGTCTCTTT
>Alligator-mir-128-2-5p
GGGGGCCGTTACACTGTAAGAGA

>Alligator-mir-129a_pre
GTCCCTCTCAGATCTTTTTGCGGTCTGGGCTTGCTGTTCCCTCCAACCCACACTCAGGAAGCCCTTACCCCAAAAAGTATCCGCGGGGG
>Alligator-mir-129a-3p
AAGCCCTTACCCCAAAAAGTAT
>Alligator-mir-129a-5p
CTTTTTGCGGTCTGGGCTTGC

>Alligator-mir-129b_pre
CTTCGCGAATCTTTTTGCGGTCTGGGCTTGCTGTACATAACTACCTAGCCGGGAAGCCCTTACCCCAAAAAGCATTCGCGGAG
>Alligator-mir-129b-3p
AAGCCCTTACCCCAAAAAGCAT
>Alligator-mir-129b-5p
CTTTTTGCGGTCTGGGCTTGC

>Alligator-mir-130a_pre
CAGGCCCTGTCCAAGGCTCTTTTTCACATTGTACTACTGTATGAGCCCTGCCAAGCAATGCAATGTAAAAAGGGCATTTGGGTAGGTGGTCCC
>Alligator-mir-130a-3p (predicted)
CAATGCAATGTAAAAAGGGCAT

>Alligator-mir-130b_pre
GTATGCTGTTGTCCAGAGCCCTTTTTCTGTTGTACTACTGGCAATTATGATGAGCAGTGCAATATTTAAAAGGGCATTTGGCTGGCAGAAACATGACC
>Alligator-mir-130b-3p
CAGTGCAATATTTAAAAGGGCAT
>Alligator-mir-130b-5p
GCCCTTTTTCTGTTGTACTAT

>Alligator-mir-130c_pre
GCATAGTGTCTGTCCAGTGCCTTTTTATGTTGTACTACTAGTGATCGTGCACAAAAAGCAGTGCAATGTTAAAAGGGCATTTGGCCAGCAATACTG
>Alligator-mir-130c-3p
AGTGCAATGTTAAAAGGGCATT

>Alligator-mir-132_pre
ACGTCGCCAGGGCAACCGTGGCTTTAGATTGTTACTGTGTGGTGGTGGGTAACAGTCTACAGCCATGGTCGCTGGGCGGACGC
>Alligator-mir-132-3p
TAACAGTCTACAGCCATGGTCG
>Alligator-mir-132-5p
ACCGTGGCTTTAGATTGTTAC

>Alligator-mir-133a-1_pre
CCAATGCTTTGCTAAAGCTGGTAAAATGGAACCAAATCACCTGTTCAATGGATTTGGTCCCCTTCAACCAGCTGTAGCTATGCATTGAT
>Alligator-mir-133a-1-3p
TTTGGTCCCCTTCAACCAGCTG
>Alligator-mir-133a-1-5p
AGCTGGTAAAATGGAACCAAAT
```

---

>Alligator-mir-133a-2\_pre  
CCAAATGCTTTTGCTAAAGCTGGTAAAATGGAACCAAATCAACTGTTCAATGGATTTGGTCCCCTTCAACCAGCTGTAGCTGTGCATTGATCAC  
>Alligator-mir-133a-2-3p  
TTTGGTCCCCTTCAACCAGCTG  
>Alligator-mir-133a-2-5p  
AGCTGGTAAAATGGAACCAAAT

>Alligator-mir-133a-3\_pre  
AGTGTGTTTCTGGGGCTGGTAAAAAGGAACCAGATCAACTTGGAAGTGGATTTGGTCCCCTTCAACCAGCTGTAGTGGCACATAAA  
>Alligator-mir-133a-3-3p  
TTTGGTCCCCTTCAACCAGCTG

>Alligator-mir-133b\_pre  
AGCTGCACTCTGCTGTGGCTGGTCAAACGGAACCAAGTCCGTCTTCTTGGAGGTTTGGTCCCCTTCAACCAGCTATAGCAGTGCTGA  
>Alligator-mir-133b-3p  
TTTGGTCCCCTTCAACCAGCTA

>Alligator-mir-135-1\_pre  
TCCCCTGTGTTATATGGCTTTTTTATTCCCTATGTGATTATACTACTCCTTTTCATATAGGGATTGAAGCCGTGCAATACGCTGGGG  
>Alligator-mir-135-1-5p  
TATGGCTTTTTTATTCCCTATGTG  
>Alligator-mir-135-1-3p  
ATATAGGGATTGAAGCCGTGC

>Alligator-mir-135-2\_pre  
TAAATTCCTCTAGTGTTTTATGGCTTTTTTATTCCCTATGTGATAGTAATAAAGTCTCATGTAGGGATGGAAGCCATGAAATACATTGTGAAAAA  
>Alligator-mir-135-2-5p  
TATGGCTTTTTTATTCCCTATGTG  
>Alligator-mir-135-2-3p  
ATGTAGGGATGGAAGCCATGAA

>Alligator-mir-135-3\_pre  
CCCTCTGCTGTGGTCTATGGCTTTTTTATTCCCTATGTGATTGCTTTTCCCTAACTCATGTAGGGCTAAAAGCCATGGGCTACACAGAGGAT  
>Alligator-mir-135-3-5p  
TATGGCTTTTTTATTCCCTATGTG  
>Alligator-mir-135-3-3p  
ATGTAGGGCTAAAAGCCATGG

>Alligator-mir-137a\_pre  
TCTGACTCTCTTCGGTGACGGGTATTCTTGGGTGGATAATACGGATTACGTTGTTATTGCTTAAGAATACGCGTAGTCGAGGAGAGTACCGCGGC  
>Alligator-mir-137a-3p  
TTATTGCTTAAGAATACGCGTA

>Alligator-mir-137b\_pre  
CAGCTCCCTTCGATGACGGGTATTCTTGGGTAGATAATACGGCTGGCGTTGTTATTGCTTGAGAATACGCGTAGTCGAGGGGAGA  
>Alligator-mir-137b-3p  
TTATTGCTTGAGAATACGCGTA

>Alligator-mir-138-1\_pre  
TCTGGATGGTACAGTGTGCAGCTGGTGTGTGAATCAGGCCGTCACCGATCAGAGAACGGCTACTTCACAACACCAGGGTTGCACCTTACCACAG  
>Alligator-mir-138-1-5p  
AGCTGGTGTGTGAATCAGGC  
>Alligator-mir-138-1-3p  
GCTACTTCACAACACCAGGGT

>Alligator-mir-138-2\_pre

---

GTATTGTTGCTGCAGCTGGTGTGTGAATCAGGCCGACAACAAGCGCATCCTACTATCCGGCTATTTCACTACACCAGGGTTGCATCATAACCAC  
>Alligator-mir-138-2-5p  
AGCTGGTGTGTGAATCAGGC  
>Alligator-mir-138-2-3p  
CTATTTCACTACACCAGGGTTA

>Alligator-mir-139\_pre  
AGGCCTGGCTGTATTCTACAGTGCATGTGTCTCCAGTGTCTTAAGCGACTGGAGATACAGCCCTGTCGGAATAACAGCCAGCGCCAA  
>Alligator-mir-139-5p  
TCTACAGTGCATGTGTCTCCA  
>Alligator-mir-139-3p  
TGGAGATACAGCCCTGTCGGA

>Alligator-mir-140\_pre  
GCTCTCTCTGTGTCTGCCAGTGGTTTTACCCTATGGTAGGTTACGTCATGCTGTTCTACCACAGGGTAGAACCACGGACGGGATACCGGGGCG  
>Alligator-mir-140-3p  
ACCACAGGGTAGAACCACGGA  
>Alligator-mir-140-5p  
CAGTGGTTTTACCCTATGGTAG

>Alligator-mir-142-1\_pre  
GACAGTGCAGTCAACCATAAAGTAGAAAGCACTACTAAACAGCACTGCAGGGTGTAGTGTTCCTACTTTATGGATGAGTGTACTGT  
>Alligator-mir-142-1-3p  
TGTAGTGTTCCTACTTTATGGA  
>Alligator-mir-142-1-5p  
CATAAAGTAGAAAGCACTACTA

>Alligator-mir-142-2\_pre  
CGGTGACAGTCTCCCCCCCCATAAAGTAGCGAGCACGACTCCGCCCGCGCCCGTGTAGTGTTCCTACTTTATGGAGGGGGTGGCTGGGAG  
>Alligator-mir-142-2-3p  
TGTAGTGTTCCTACTTTATGGA  
>Alligator-mir-142-5p  
CATAAAGTAGCGAGCACGACT

>Alligator-mir-143\_pre  
ATGTCTCCCAGCCCAAGGTGCAGTGTCTGCATCTCTGGTCAGTTGTGAGTCTGAGATGAAGCACTGTAGCTCGGGAAGGGAGGAAC  
>Alligator-mir-143-3p  
TGAGATGAAGCACTGTAGCTC  
>Alligator-mir-143-5p  
GGTGCAGTGTCTGCATCTCTGG

>Alligator-mir-144\_pre  
GCGGGGGCTCTGGGCAGGATATCATCGTATACTGTAAGTCGGCTATGAGACACTACAGTATAGATGATGTACTACCCCGGCCTTTCCCCT  
>Alligator-mir-144-5p  
GGATATCATCGTATACTGTAAG  
>Alligator-mir-144-3p  
TACAGTATAGATGATGTACTA

>Alligator-mir-145\_pre  
TGCTGTGTCTCAGGGTCCAGTTTTCCAGGAATCCCTTGGGCACTGTGTTGGGGATTCCCTGGAAATACTGTTCTTGGGGCCGTGGCTCAG  
>Alligator-mir-145-5p  
GTCCAGTTTTCCAGGAATCC  
>Alligator-mir-145-3p  
ATTCTGGAAATACTGTTCTT

>Alligator-mir-146a\_pre  
ATGTATTCTTGGCTTTGAGAAGTGAATTCATGGGTGTGAATTGAATCTTGAACAGACCCATGGGGCTCAGTTCCTCAGCTTGGATATC

---

>Alligator-mir-146a-5p  
TGAGAACTGAATTCCATGGGT

>Alligator-mir-146b\_pre  
CGCTCCTTGGCTTTGAGAACTGAATTCCATAGGCTTTAAAAGACAAAAAAGCCCTATGGATTTCAGTTCTGTAGCTGGGCGGCAAA

>Alligator-mir-146b-5p  
TGAGAACTGAATTCCATAGGCT

>Alligator-mir-146b-3p  
AGCCCTATGGATTTCAGTTCTGT

>Alligator-mir-146c\_pre  
GGCAGTTCCCAGCTCTGAGAACTGAATTCCATGGACTGGTTCCCTCTTCATATCTTCAGTCCATAGTAGTCAGTTCTCTAGCTTGGCTGTATC

>Alligator-mir-146c-5p  
TGAGAACTGAATTCCATGGACTG

>Alligator-mir-146c-3p  
GTCCATAGTAGTCAGTTCTCT

>Alligator-mir-147\_pre  
TACTCTATGAATCTAGTGGAAATCATTCTGCACAAACTCGACTATTGAAATCAGTGTGCGGAAATGCTTCTGCTACATTTTTAGGGTCTCCC

>Alligator-mir-147-3p  
GTGTGCGGAAATGCTTCTGCT

>Alligator-mir-147-5p  
TGGAATCATTCTGCACAAACT

>Alligator-mir-148b\_pre  
TTGAGGCGGAGTTCTGTGCATACACTCGGACTGTGCTACCTGGGGTCAGTGCATCACAGAACTTTGTCTCGAGCGC

>Alligator-mir-148b-3p  
TCAGTGCATCACAGAACTTTG

>Alligator-mir-148b-5p  
GAGTTCTGTGCATACACTCGGAC

>Alligator-mir-150\_pre  
CCTTCTCTGCCCCCACTCTCTCCCAACCCTTGTACCAGTGTTCATGTTACTGGAACCCTGGTACAGAGGATGGATGAGAAGGAGGCGTGGGACCCC

>Alligator-mir-150-5p  
TCTCCCAACCCTTGTACCAGTG

>Alligator-mir-150-3p  
CTGGTACAGAGGATGGATGAGA

>Alligator-mir-152\_pre  
GTCTCTCAGCTCAGGTTCTGTGGTACACTTGGACTCGGACTCTGGAGCAGTTCAGTGCATGACAGAACTTGGGTTTGGATGGAC

>Alligator-mir-152-3p  
TCAGTGCATGACAGAACTTGG

>Alligator-mir-152-5p  
AGGTTCTGTGGTACACTTGGAC

>Alligator-mir-153-1\_pre  
TCTCGCGGCTGCCGGGGCATTTTTTGTGATTTGCAGCTCGTGGTCTGGGTCCAGTTGCATAGTTCACAAAAGTGATCGTCGGCGGCCGCGCCTG

>Alligator-mir-153-1-3p  
TTGCATAGTTCACAAAAGTGATC

>Alligator-mir-153-2\_pre  
AGCGGTTGCCAGTGTTCATTTTTGTGATGTTGCAGCTAGTAATATGAGCCCAGTTGCATAGTTCACAAAAGTGATCATTTGAAACTGTGACT

>Alligator-mir-153-2-3p  
TTGCATAGTTCACAAAAGTGATC

>Alligator-mir-153-3-5p  
GTCATTTTTGTGATGTTGCAGCT

---

>Alligator-mir-155\_pre  
GTAGGCTGTATGTTGTTAATGCTAATCGTGATAGGGGTTTTACCTCTGACTGACTCCTACATGTTAGCATTAGCACTGTATGATGCCTGTTACC  
>Alligator-mir-155-5p  
TTAATGCTAATCGTGATAGGG

>Alligator-mir-181a-1\_pre  
GTGGTTGCTTCAGTGAACATTCAACGCTGTCGGTGAGTTTGGATTTAAAGTGAAAACCATCGACCGTTGATTGTACCCTCCAGCTAACCATC  
>Alligator-mir-181a-1-5p  
AACATTCAACGCTGTCGGTGAGT  
>Alligator-mir-181a-1-3p  
ACCATCGACCGTTGATTGTACC

>Alligator-mir-181a-2\_pre  
CAGATAGCTTCAGTGAACATTCAACGCTGTCGGTGAGTTTGGAGCATTAGAAAAAAACCATCGACCGTTGACTGTACCCTTGAGGTTTATCACA  
>Alligator-mir-181a-2-5p  
AACATTCAACGCTGTCGGTGA  
>Alligator-mir-181a-2-3p  
ACCATCGACCGTTGACTGTACC

>Alligator-mir-181a-3\_pre  
GATACAAAGGTTTTAGCGAACATTCAACGCTGTCGGTGAGTTTTGGCAGTCAGGTTAAACCATCGACCGTTGAGTGTACCCTGCAACCTTGGTAAC  
>Alligator-mir-181a-3-5p  
AACATTCAACGCTGTCGGTGAGT  
>Alligator-mir-181a-3-3p  
ACCATCGACCGTTGAGTGTACCC

>Alligator-mir-181b-1\_pre  
AAGGTCACAATCAACATTCAATTGCTGTCGGTGGGTTTTAACTATGCGGACAAGCTCACTGAACAATGAATGCAACTGTGGCCCCACT  
>Alligator-mir-181b-1-5p  
AACATTCAATTGCTGTCGGTGGGTT  
>Alligator-mir-181b-1-3p  
CTCACTGAACAATGAATGCAA

>Alligator-mir-181b-2\_pre  
TGCATCTAATGGCTGCAATCAACATTCAATTGCTGTCGGTGGGTTTTAGTTTTGTACCAACTCACTGATCAATGAATGCAAACTGCGGACCAGATAGC  
>Alligator-mir-181b-2-5p  
AACATTCAATTGCTGTCGGTGGGTT  
>Alligator-mir-181b-2-3p  
ACTCACTGATCAATGAATGCA

>Alligator-mir-181b-3\_pre  
AAAAAGTCACAATCAACATTCAATTGCTGTCGGTGGGTTGTGATGCTGAAGGGAAAACCTCACGGATCAATGAATGCAACTGTGATTGGAACA  
>Alligator-mir-181b-3-5p  
AACATTCAATTGCTGTCGGTGGGTT  
>Alligator-mir-181b-3-3p  
CTCACGGATCAATGAATGCAA

>Alligator-mir-182\_pre  
GGTCCCTCTCGCTGTCTTTGGCAATGGTAGAACTCACACTGGTGAGGTATCAGGATCCGGTGGTTCTAGACTTGCCAACTACCGCCCGAGGGCACA  
>Alligator-mir-182-5p  
TTTGGCAATGGTAGAACTCACACT  
>Alligator-mir-182-3p  
TGGTTCTAGACTTGCCAACT

>Alligator-mir-183\_pre  
ACTCCTGTTCTGTGTATGGCACTGGTAGAATTCAGTGAATTTACCATAGGGCCATAAACAGAGCAGAGAA  
>Alligator-mir-183-5p

---

TATGGCACTGGTAGAATTCACT  
>Alligator-mir-183-3p  
TGAATTACCATAGGGCCATA

>Alligator-mir-184\_pre  
ACGCCATTCCCATCTCCTTATCACTTTTCCAGCCCAGCTTTCTCATGCTCACTGTTGGACGGAGAACTGATAAGGGTATGTGACTGACACGAG  
>Alligator-mir-184-3p  
TGGACGGAGAACTGATAAGGGT  
>Alligator-mir-184-5p  
CCTTATCACTTTTCCAGCCCAGC

>Alligator-mir-187\_pre  
TGTGAGACCTCCGGCTACAACACAGGACATGGGAGCTTTTCTGAACCCTCGTGTCTTGTGTTGCAGCCAGAGGGGCACATC  
>Alligator-mir-187-3p  
TCGTGTCTTGTGTTGCAGCCAA  
>Alligator-mir-187-5p  
GCTACAACACAGGACATGGGAGA

>Alligator-mir-190a\_pre  
AGGACTCTGTGTGATATGTTTGGATATATTAGGTTGTTATTTAATCCAACCTATATATCAAACATATTCTTACAGTGTCTTGCCTT  
>Alligator-mir-190a-5p  
TGATATGTTTGGATATATTAGG  
>Alligator-mir-190a-3p  
ACTATATATCAAACATATTCTT

>Alligator-mir-190b\_pre  
GCCACCTGCCTCTGTCTGATATGTTTGGATATTAGGTTGTTTATTGGAAAGCCAACCTAAATATCAAACATATTCTTACAGCGCCAGGGCCCCCTC  
>Alligator-mir-190b-5p  
TGATATGTTTGGATATTAGGTTG

>Alligator-mir-191\_pre  
GCGACAGCGGGCAACGGAATCCCAAAAGCAGCTGTCTTCCGCTCGGCACCTCAGCTGCGCTTGGATTTTCGTTCCCTGCTCTCCCGCC  
>Alligator-mir-191-5p  
CAACGGAATCCCAAAAGCAGCT

>Alligator-mir-192\_pre  
TGCGTGCATGGGGCTATGACCTATGGATTGACAGCCAGTATCGGAGCCTCGCCCTGGCTGTCTGTTCTATAGGGCATAGGACTGGGCGCAC  
>Alligator-mir-192-5p  
TGACCTATGGATTGACAGCCAG  
>Alligator-mir-192-3p  
TGGCTGTCTGTTCTATAGGGCATA

>Alligator-mir-193a\_pre  
CATGCGAGCTGAGGGCTGGGTCTTTGCGGGCGAGGTGAGAGGTTTCGTGCGTTCAACTGGCCTACAAAGTCCCAGTTCTCGGCTCCCAGC  
>Alligator-mir-193a-3p  
AACTGGCCTACAAAGTCCCA  
>Alligator-mir-193a-5p  
TGGGTCTTTGCGGGCGAGGTG

>Alligator-mir-193b\_pre  
AAAGTTGTGGTTCCAGAGTCGGGGTTTTGGGGGCAAGATGAGCTTATGTTTTATCCAACCTGGCCCACAAAGTCCCCTTTTTGGTGGTCACTTTGT  
>Alligator-mir-193b-3p  
TACTGGCCCACAAAGTCCCCT  
>Alligator-mir-193b-5p  
CGGGTTTTGGGGCAAGATGA

>Alligator-mir-194-1\_pre



---

ACCAGCAGTACTTTCAAATGTAACAGCAACTCCATGTGGACTACGCTGACTTCCAGTGGAGATGCTGTTACTTTTGACAGCCACTCACAGACAT  
>Alligator-mir-194-1-5p  
TGTAACAGCAACTCCATGTGGAC  
>Alligator-mir-194-1-3p  
CCAGTGGAGATGCTGTTACTTT

>Alligator-mir-194-2\_pre  
CGCTGGTGTCCATCCGCTGTAACAGCAACTCCATGTGGGAGGGTCCGTTGGTCCCCGTGGGGCTGCTGTTATTCTGGACGGGCACCGGGAGC  
>Alligator-mir-194-2-5p  
TGTAACAGCAACTCCATGTGGA  
>Alligator-mir-194-2-3p  
CCCCGTGGGGCTGCTGTTATTCT

>Alligator-mir-196-1\_pre  
GAACTGCTTTGTGAATTAGGTAGTTTCATGTTGTTGGGCTTTTTATTTTTAAACACAAGAACATAAAAACCTACCTGATTTACTCCAGTTATTCTCC  
>Alligator-mir-196-2\_pre  
GTGCAGCTGATCTGTGGTTTAGGTAGTTTCATGTTGTTGGGATTGGCTTTTAGCTCGGCAACAAGAAACTGCCTTAATTACGTCAGTTAGTGTTC  
>Alligator-mir-196-3\_pre  
CGAGAACTGCTGTGTGGTTTAGGTAGTTTCATGTTGTTGGGGCTCCACCTTTCTCTCTACAGCACGAAACTGCCTTAATTACTTCAGTTGAAATCG  
>Alligator-mir-196-5p  
TAGGTAGTTTCATGTTGTTGG

>Alligator-mir-199-1\_pre  
AGTCCAGCCCAGCCTGCCAGTGTTCAGACTACCTGTTTCAGGAGCATATGAAGTTGTACAGTAGTCTGCACATTGGTTAGATCGGGCTTGGCAT  
>Alligator-mir-199-2\_pre  
CCTGCTCCGTCGCCCCAGTGTTCAGACTACCTGTTTCAGGACAATGCTGTTGTACAGTAGTCTGCACATTGGTTAGACTGGGCAAGGGAA  
>Alligator-mir-199-3\_pre  
TCCACTCCGTCGCCAGTGTTCAGACTACCTGTTTCAGGACTACGAGATTGTACAGTAGTCTGCACATTGGTTAGGCTGTGCTGGG  
>Alligator-mir-199-3p  
ACAGTAGTCTGCACATTGGTTA  
>Alligator-mir-199-5p  
CCCAGTGTTCAGACTACCTGTT

>Alligator-mir-200a\_pre  
TGGTCCTCTGTGGGCATCTTACTAGACAGTGCTGGATATTTTTGGATCTACTCTAACACTGTCTGGTAACGATGTTTAAAGGGTGAACCAA  
>Alligator-mir-200a-3p  
TAACACTGTCTGGTAACGATGT  
>Alligator-mir-200a-5p  
CATCTTACTAGACAGTGCTGG

>Alligator-mir-200b\_pre  
TCCTGGGATGCCGTTACCATCTTACTGGGCAGCATTGGATGTTTTCTGTGTTTTCTAATACTGCCTGGTAATGATGATTATGGTGTCTCGC  
>Alligator-mir-200b-3p  
TAATACTGCCTGGTAATGATGAT  
>Alligator-mir-200b-5p  
CATCTTACTGGGCAGCATTGG

>Alligator-mir-202\_pre  
CTCGTTGTTCCTTTTTCCCTATGCATATACTTCTTTGAGAATTGGATCTAAAGAGGCATAGGGCATGGGAAAATGGGGCGACTGAGGTA  
>Alligator-mir-202-5p  
TTTTCCCTATGCATATACTTCTTT

>Alligator-mir-203\_pre  
CGCTCTCCGCTCGCGGGTGCAGTGGTTCTTAACAGTTCAACAGTTCTTTAGGCTAATTGTGAAATGTTTAGGACCCTTGACCCGCGAGGCGCCG  
>Alligator-mir-203-3p  
GTGAAATGTTTAGGACCCTT  
>Alligator-mir-203-5p

AGTGGTTCTTAAACAGTTCAACAG

>Alligator-mir-204-1\_pre

TGTGACCTGTGGACTTCCCTTTGTCATCCTATGCCTGAGAATATATGAAGGGGGCTGGGAAGGCAAAGGGACGTTCAATTGTCATCACT

>Alligator-mir-204-1-5p

TTCCCTTTGTCATCCTATGCCT

>Alligator-mir-204-1-3p

GCTGGGAAGGCAAAGGGACGT

>Alligator-mir-204-2\_pre

GACCATGTGACCTGTGGGCTTCCCTTTGTCATCCTATGCCTGGAGATCATAGTGAGGCAGGGACAACAAAGGGATGCTCAATTGTCATCTCGTGCA

>Alligator-mir-204-2-5p

TTCCCTTTGTCATCCTATGCCT

>Alligator-mir-204-2-3p

GCAGGGACAACAAAGGGATGC

>Alligator-mir-205a\_pre

TCCATGGATTCTGTTGTCCTTCATTCCACCGGAGTCTGTCTCATACCTAATCAGATTTTCAGTGGAGTGAAGCACAAAGAGACATGGAGTTG

>Alligator-mir-205a-5p

TCCTTCATTCCACCGGAGTCTG

>Alligator-mir-205a-3p

GATTTTCAGTGGAGTGAAGCACA

>Alligator-mir-205b\_pre

TCCATGGCTTTCTGGTGCCCTTCATTCCACCGGAATCTGTAGGGATCAAAACCAGATTTTCAGTGAAATGAAGCCCCCTCAGACGTGGAAT

>Alligator-mir-205b-5p

CCCTTCATTCCACCGGAATCTGT

>Alligator-mir-206\_pre

CTTCTCTTTTGAGGCAACATGCTTCTTTATATCCCCATAGGGATAACAGTGCTATGGAATGTAAGGAAGTGTGTGGTTTTCGGGGAGATG

>Alligator-mir-206-3p

TGGAATGTAAGGAAGTGTGTGG

>Alligator-mir-206-5p

ACATGCTTCTTTATATCCCCAT

>Alligator-mir-208\_pre

GCTGCTTCTCCAACAGGGAAGCTTTTGGCTTGGGTATATTTGTCACTCGCAGTGTATAAGACGAGCGAAAAGCTTCTTGGTTGGAAGAGAGAT

>Alligator-mir-208-3p

ATAAGACGAGCGAAAAGCTTCT

>Alligator-mir-210\_pre

CTCCAGAAGCAGGTGAGCCACTGACTAACGCACATTTGTGCTGTTAGCGATTTCCACTGTGCGTGTGACAGCGGCTAACCTGNTTTTCGGACAT

>Alligator-mir-210-5p

AGCCACTGACTAACGCACATTT

>Alligator-mir-210-3p

CTGTGCGTGTGACAGCGGCTA

>Alligator-mir-212\_pre

CAGCGCTCGGCACCTTGGCTCTAGACTGCTTACTGCTGAGCACGGCGACCGGAACAGTAACAGTCTACAGTCATGGCTACTGAAGCATGACA

>Alligator-mir-212-5p

ACCTTGGCTCTAGACTGCTTA

>Alligator-mir-212-3p

TAACAGTCTACAGTCATGGCTA

>Alligator-mir-214\_pre

CGGAGTTGTCATGTGTCTGCCTGTCTACACTTGTGCTGTGCAGAACATCCACTCACCTGTACAGCAGGCACAGACAGGCAGTCACATGACAACCC

>Alligator-mir-214-3p

---

ACAGCAGGCACAGACAGGCAG  
>Alligator-mir-214-5p  
TGCCTGTCTACACTTGCTGTGC

>Alligator-mir-215\_pre  
AACTGTTGTGCAGGAAAATGACCTATGAATTGACAGACTGTGTATTCTAAGCTTGTCTGTCATTTCTGTAGGCCAATATTCTGCACACCTTC  
>Alligator-mir-215-5p  
TTGACCTATGAATTGACAGAC  
>Alligator-mir-215-3p  
TCTGTCATTTCTGTAGGCCAAT

>Alligator-mir-216a\_pre  
GATGGCTGTGAATTGGCATAATCTCAGCTGGCAACTGTGAGCAGTTCATAAAATTCTCTCACAGTTGTATCTGGGATTATGCTAAACATAGCAATTT  
>Alligator-mir-216a-5p  
TAATCTCAGCTGGCAACTGTG

>Alligator-mir-216b\_pre  
CAAGTCGCAGACTGGGAAATCTCTACAGGCAAATGTGATGTCTTTATAGTAATCTCACAATTACCTATAGAGATTCTTCAATCTGGCATCTTC  
>Alligator-mir-216b-5p  
AAATCTCTACAGGCAAATGTGA  
>Alligator-mir-216b-3p  
TCACAATTACCTATAGAGATTC

>Alligator-mir-217\_pre  
TTTTGATGTGCGAGATACTGCATCAGGAACTGATTGGATAATAATCAGTCCACATCAGTTCCCTAATGCATTGCCTTCAGCATCTAAA  
>Alligator-mir-217-5p  
TACTGCATCAGGAACTGATTGG  
>Alligator-mir-217-3p  
CATCAGTTCCCTAATGCATTGCC

>Alligator-mir-218-1\_pre  
TAGCGAGATTTTCTGTTGTGCTTGATCTAACCATGTGGTTGTGAGGTATGAGTAAAACATGGTTCTGTCAAGCACCATGGAACGTCACGCAGCT  
>Alligator-mir-218-2\_pre  
AATGGGGTTTTCTTTGTGCTTGATCTAACCATGTGGTAGAACAATACAAATTGAACATGGTTCTGTCAAGCACCATGGAAGGCTGCATA  
>Alligator-mir-218-5p  
TTGTGCTTGATCTAACCATGT

>Alligator-mir-219a\_pre  
TGAGCGCCGGGTCTGATTGTCCAAACGCAATTCTTGTGTCTGCCCAAGAATTGAGTGTGGACGTCGGGAGCCGCGTTCCTCCCA  
>Alligator-mir-219a-3p  
AGAATTGAGTGTGGACGTCGGG  
>Alligator-mir-219a-5p  
TGATTGTCCAAACGCAATTCTTG

>Alligator-mir-219b\_pre  
GGAGTCTCCGCTCCTGATTGTCCAAACGCAATTCTTGTGCCGTGGAAACGTACAAACCAAGAATTGTGTCTGGACATCTGTGGCGGGGAGTCC  
>Alligator-mir-219b-3p  
AGAATTGTGTCTGGACATCTG  
>Alligator-mir-219b-5p  
TGATTGTCCAAACGCAATTCTTG

>Alligator-mir-221\_pre  
TCCAGGTTTGGGGCATGAACCTGGCATAACAATGTAGATTTCTGTATTTCTTAAGCAACAGCTACATTGTCTGCTGGGTTTCAAGCTGCCTGGAAA  
>Alligator-mir-221-5p  
ACCTGGCATAACAATGTAGATTT  
>Alligator-mir-221-3p  
AGCTACATTGTCTGCTGGGTTTC

---

---

>Alligator-mir-222a\_pre  
TAGTTGCCCATCAATCGCTCAGTAGTCAGTGTAGATTCTGTTTTTACAATCAGCAGCTACATCTGGCTACTGGGTCTCTGATGACATCTTGTAG  
>Alligator-mir-222a-3p  
AGCTACATCTGGCTACTGGGTCTC  
>Alligator-mir-222a-5p  
CGCTCAGTAGTCAGTGTAGATTC

>Alligator-mir-222b\_pre  
GATGTAATTGGGTGCTCAGTAGTCGGTGTAGAATCTGTCTGACATTGATACCAACAGCTACATCTGATTACTGGGTCACTAATTGCATCATCAA  
>Alligator-mir-222b-3p  
AGCTACATCTGATTACTGGGTAC  
>Alligator-mir-222b-5p  
TGCTCAGTAGTCGGTGTAGAATC

>Alligator-mir-223\_pre  
CGCAGTGCTGCACTCCGTGTATTTGACAAGCTGAGTTTGACACTCAGTGTGGCAGAGTGTGAGTTTGTCAAATACCCCAAGTGAGGC  
>Alligator-mir-223-3p  
TGTCAGTTTGTCAAATACCCCAA  
>Alligator-mir-223-5p  
CGTGTATTTGACAAGCTGAGTTT

>Alligator-mir-301a\_pre  
CTGCTAACGAATGCTCTGACTTTATTGCACTACTGTACTTTACAGCTAGCAGTGCAATAGTATTGTCAAAGCATCTGAAAGCAGAG  
>Alligator-mir-301a-3p  
CAGTGCAATAGTATTGTCAAAGCAT  
>Alligator-mir-301a-5p  
GCTCTGACTTTATTGCACTACT

>Alligator-mir-301b\_pre  
GTGGCTGCTGGTATCGCTGGCTCTGACAATGTTGCACTACTGTCTGCACAAATAAAGCAGTGCAATAATATTGTCAAAGCATTTGGTTCCAGTCCCT  
>Alligator-mir-301b-3p  
CAGTGCAATAATATTGTCAAAGC  
>Alligator-mir-301b-5p  
TCTGACAATGTTGCACTACT

>Alligator-mir-302a\_pre  
AGCTTAAAGGACCCCCAGAACTTTAATGTGGATGTACTTGCTTTGTTTCTGAAAAAGTAAGTGCTTCCATGTTTTGGTGCTGGTGAATCCTGCTCT  
>Alligator-mir-302a-3p (predicted)  
TAAGTGCTTCCATGTTTTGGTG

>Alligator-mir-302b\_pre  
GAAGTATGGTTTTCCCTTCTACTTTAACATGGAGGTGCTTTCTGTGACTTATAAGAAGTAAGTGCTTCCATGTTTTAGTAGAGGTGAAATCCTGTTC  
>Alligator-mir-302b-3p  
TAAGTGCTTCCATGTTTTAGTT

>Alligator-mir-302c\_pre  
TTAAACAGCCTCCTTTGCTTTAACATGGAGGTACCTGCTGCCTAAAAAAGTAAGTGCTTCCATGTTTTCAGTGGTGGTGGTAGTTCCCT  
>Alligator-mir-302c-3p (predicted)  
TAAGTGCTTCCATGTTTCAGTG

>Alligator-mir-302d\_pre  
CCCCTCTACTTTAACATGGGAGGTACTTGCTGGATGCTTGAAAAAGTAAGTGCTTCCATGTTTTAGTTGTGGTGAATCCT  
>Alligator-mir-302d-3p  
TAAGTGCTTCCATGTTTTAGTT

>Alligator-mir-338-1\_pre

```
CCACTTGCTCCCGCTCCCCAACAAATATCCTGGTGCTGAGCGAGTTGCGCACAGAGACTCCAGCATCAGTGATTTTGTGAGGAGGGCGAGCTCTG
>Alligator-mir-338-1-3p
TCCAGCATCAGTGATTTTGT
>Alligator-mir-338-1-5p
AACAAATATCCTGGTGCTGAG

>Alligator-mir-338-2_pre
TGCAAATGTTTATTTCTGGCAACTATCCTGATGCTGTCTGAGTATGTGGTAAAGCTCCAGCATCAGTGATTTTGTGTTAGTGGTAAATTCAAG
>Alligator-mir-338-2-3p
TCCAGCATCAGTGATTTTGTGTTG
>Alligator-mir-338-2-5p
AACACTATCCTGATGCTGTCT

>Alligator-mir-365-1_pre
TTACCGCAGGGAAAATGAGGGACTTTTGGGGGCAGTTGTGTTTCCATTACACTATCATAATGCCCTAAAAATCCTTATTGCTCTTGCAGTAT
>Alligator-mir-365-1-3p
TAATGCCCTAAAAATCCTTA
>Alligator-mir-365-1-5p
AGGGACTTTTGGGGGCAGTTGTG

>Alligator-mir-365-2_pre
GTGGCAGCAAGAAAATGAGGGACTTTTCAGGGGCAGCTGTGTTTACTAACCCAGTCATAATGCCCTAAAAATCCTTATTGTTCTTGCAATGTTTC
>Alligator-mir-365-2-3p
TAATGCCCTAAAAATCCTTA
>Alligator-mir-365-2-5p
AGGGACTTTTCAGGGGCAGCTGT

>Alligator-mir-367_pre
TCTTCAACTACAGGCTGCTACTGTTGCTAATATGCAACTCTGTTATGTCAAAATTTGGAATTTGCACTTTAGCAATGGTGATGGACTGTAAGACACAC
>Alligator-mir-367-3p (predicted)
AATTGCACTTTAGCAATGGTG

>Alligator-mir-375_pre
CTGGCCGCCCTCTGCGCCTGCCTGGCGTCGAGCCCCGACGTGCAAGACCTGACGTGAATGTTTGTTCGTTTCGGCTCGCGTTAGGCAGGCCAGCCCT
>Alligator-mir-375-3p
TTTGTTCGTTTCGGCTCGCGTT

>Alligator-mir-383_pre
CGCCAAGTCACCTGCTCCTCAGATCAGAAGGTGATTGTGGCTTTGAGTAGATATTAAGCAGCCACAGCACTGCCTGGTCAGAAAGAGCAAGTGTAC
>Alligator-mir-383-5p
AGATCAGAAGGTGATTGTGG

>Alligator-mir-425_pre
GGAGAGAGATTGCTTTGGAATGACACGATCACTCCCGCTGAGCGAGACGCCCGACAGCCATCGGGAATATCGTGTCGGTCCAAAGCTCTTTTCG
>Alligator-mir-425-5p
AATGACACGATCACTCCCGCTGA
>Alligator-mir-425-3p
CATCGGGAATATCGTGTCGGTC

>Alligator-mir-429_pre
CCTGAGTGCCTGCTGATTGACGCTTTACCAGACAAAGTTAGATCTAGCTATTTTCGTCTAATACTGTCTGGTAATGCCGTTGATCGCACTGGCA
>Alligator-mir-429-3p
TAATACTGTCTGGTAATGCC
>Alligator-mir-429-5p
TCTTACCAGACAAAGTTAGA

>Alligator-mir-449a_pre
```

---

GTGTGTGATGGGAAGGCAGTGTACTGTTAGCTGGTGTGAGTTTTTTCAACCAGCTAACATGCAGCTGCTATCCTACTGCACAAACTTTGA  
>Alligator-mir-449a-5p  
AGGCAGTGTACTGTTAGCTGGT

>Alligator-mir-449b\_pre  
TAGCGCTCCCTGTGTCTGGTAGGCAGTGTACTGTTAGCTGGCTGCTTTGTGTGAATCTAGCAGTCGCTACTGCACTGTCAACAGCTGCAGGGGCAG  
>Alligator-mir-449b-5p  
AGGCAGTGTACTGTTAGCTGGCT

>Alligator-mir-449c\_pre  
ATGTTTCAGTTTGGCAGTGCATTGCTAGCTGGCTGTTGTGTACGTGTGTTAACAGTTGCTAGCTGTACTCCATATTGTTGCATTC  
>Alligator-mir-449c-5p  
TTGGCAGTGCATTGCTAGCTGGC

>Alligator-mir-449d\_pre  
ATGTGTGTGTGATGATTAGGCAGTGTATTGTTAGTTAGCTGGCATTACATAACCAGCAACTAAACACACTTCCACATTAGCACACAAC  
>Alligator-mir-449d-5p  
AGGCAGTGTATTGTTAGTTAGC

>Alligator-mir-454\_pre  
AACCTTAAGGATAAGACCCTATCAATATTGCCTCTGCTTTTTGTGATCAGGGTAGTAGTGCAATATTGCTTATAGGGTCTTTTTCTTTGGAGGGT  
>Alligator-mir-454-3p  
TAGTGCAATATTGCTTATAGGGTCT  
>Alligator-mir-454-5p  
ACCCTATCAATATTGCCTCTGCT

>Alligator-mir-455\_pre  
TCCCTGGTGTGAGGGTATGTGCCCTTGGACTACATCGTGGAAGCCAGCACCATGCAGTCCATGGGCATATACACTTGCCTCAAGGTTTATTT  
>Alligator-mir-455-5p  
TATGTGCCCTTGGACTACATCG  
>Alligator-mir-455-3p  
ATGCAGTCCATGGGCATATACA

>Alligator-mir-456\_pre  
TGTGTATGTGTGAGCAGGCATCTTCTCAGCCTACATGTGGATTCTTAAATCTGCAGGCTGGTTAGATGGTTGTCATACATTCACCTGA  
>Alligator-mir-456-3p  
CAGGCTGGTTAGATGGTTGT

>Alligator-mir-458\_pre  
TGGTGCAGATGGCAGCGCCATTTTCAGAGCTATAAACAGTATCATTGTCATAGCTCTTTGAATGGTACTGCCATATGTACTG  
>Alligator-mir-458-3p  
ATAGCTCTTTGAATGGTACTGC

>Alligator-mir-459\_pre  
TTGTTTCTTGCAATCAGTAACAAGGATTCATCTCTGTATTGTGTGAAGAACAGAGAGAGTCTTTGTAAC TAAGTGCAAGTAATAGCCA  
>Alligator-mir-459-5p  
TCAGTAACAAGGATTCATCTCTG

>Alligator-mir-460a\_pre  
TGACTTTATAGGACCTGCATTGTACACACTGTGTGTATTGACTGGGCGTGCACAGCGCATACAATGTGGATACTGTAGAAGTCA  
>Alligator-mir-460a-5p  
CCTGCATTGTACACACTGTGTG

>Alligator-mir-460b\_pre  
GGACGTGGCTCTATGTTGTCTCATTGTACATGCTGTGTGTATATTTATGACGTACACAGCGCATGCAATGTGGACAGAATGGAGACCAGCAGGCT  
>Alligator-mir-460b-5p  
TCCTCATTGTACATGCTGTGTG

---

>Alligator-mir-460b-3p  
CACAGCGCATGCAATGTGGACA

>Alligator-mir-489\_pre  
GTGGTGGCTTGGTGGTTCGTATGTATGACGTCATTTACTTGGACTTTTAGGAGTGACATCATATGTACGGCTGCTAAACTGCTGCAT  
>Alligator-mir-489-3p  
TGACATCATATGTACGGCTGCT  
>Alligator-mir-489-5p  
TGGTTCGTATGTATGACGTCATT

>Alligator-mir-490\_pre  
GTTTCATGGTTTCGACACCATGGATCTCCAGGTGGGTCAAGACTATAGAGATACACCAACCTGGAGGACTCCATGCTGTTGAGCTGTTTACA  
>Alligator-mir-490-5p  
CCATGGATCTCCAGGTGGGTCA  
>Alligator-mir-490-3p  
CAACCTGGAGGACTCCATGCTG

>Alligator-mir-497\_pre  
CAGGCCAGCCCCGCCAGCAGCACATCATGGTTTGTGGGGTCTCGTGGCACAGACCATGGCGTGGTGCTACCGCGGGGCCGGGAGAC  
>Alligator-mir-497-5p  
TAGCAGCACATCATGGTTTGT  
>Alligator-mir-497-3p  
CAGACCATGGCGTGGTGCTACC

>Alligator-mir-499\_pre  
TGAGAGAGCGGCAGTTAAGACTTGCAGTGATGTTTAGATAATGTATTACATGAACATCACTTTAAGTCTGTGCTACTTCTCTCCTC  
>Alligator-mir-499-5p  
TTAAGACTTGCAGTGATGTTT  
>Alligator-mir-499-3p  
AACATCACTTTAAGTCTGTGCT

>Alligator-mir-551-1\_pre  
TTCTGCTTTAACCTTGGAAATCAAGGATGGGTGAAGCCTGTTGGAATAACTCTAGGCGACCCATACTTGGTTTCAAGGGTCAGCAGGGATT  
>Alligator-mir-551-1-3p  
GCGACCCATACTTGGTTTCA  
>Alligator-mir-551-1-5p  
GAAATCAAGGATGGGTGAAGC

>Alligator-mir-551-2\_pre  
CATGACCCAATGGCTCCAGAAATCAAGGGTGGGTAAAGACCTCGTAAGAACAGTTGAAGGCGACCCATACTTGGTTTCAAGGGCTTTGAGGGTATAG  
>Alligator-mir-551-2-3p  
GCGACCCATACTTGGTTTCA

>Alligator-mir-599\_pre  
CATATTGTCCATAGTGTGTTTGGATAAGCTGACATGGGACAGGAGTTCTTTTCACTGTTGTGTCAGTTTATCAAACCCATACCTGGACATCAGTC  
>Alligator-mir-599-3p  
GTTGTGTCAGTTTATCAAACCC  
>Alligator-mir-599-5p  
GTTTGGATAAGCTGACATGGGAC

>Alligator-mir-737\_pre  
GCTACTCTGCTGTTATTTTTTTAGGTTTTGATTTTTTATTGCATCTTCATGCGAAAATCAAACCTAAAGAAAATGCTGCAAAGATAGAT  
>Alligator-mir-737-5p  
ATTTTTTTTAGGTTTTGATTTTT

>Alligator-mir-875\_pre  
GTTTAGTGGTACAATACCTCAGTCTTTTCAGGTGTTCTATAAAAATCACCTGGAAAATATTGAGGTTGAGTTTCACTGAACACAGGC

---

>Alligator-mir-875-5p  
AATACCTCAGTCTTTTCAGGTG

>Alligator-mir-1306\_pre  
ATGAACAGCCTCCACCACCTCCCCTGCAAACGTCCAGTGACGCAGAGGTAATGGACGTTGGCTCTGGTGGTGATGGACAGTCAGATAC  
>Alligator-mir-1306-3p  
TGGACGTTGGCTCTGGTGGTGAT  
>Alligator-mir-1306-5p  
CACCTCCCCTGCAAACGTCCA

>Alligator-mir-1329\_pre  
GGTCTGGTTGTAGAGATACAGTGATCAGGTTACGATGATTTCTCAAGTAACAACCTCGTAGCTTGATCACAATATCCCTATGACTTAGATAA  
>Alligator-mir-1329-5p  
TACAGTGATCAGGTTACGATGAT

>Alligator-mir-1388\_pre  
AGTGAGGGGCGTCCCCAGGACTGTCTAACCTGAGAATGGTGAAACACGAGGGTCAATCTCAGGTTTCGTCAGCCCATGAGACGCTCTCTCCAG  
>Alligator-mir-1388-5p  
AGGACTGTCTAACCTGAGAATG  
>Alligator-mir-1388-3p  
ATCTCAGGTTTCGTCAGCCCAT

>Alligator-mir-1397\_pre  
ACAGAGTGCGATGTGTGCATTGCATTGCGACGGGTTACATCACTGGTCGTAACATGATGTAACCCAACGCAGCATGATGTAAGCGTCGTGATACAT  
>Alligator-mir-1397-5p  
TGCATTGCGACGGGTTACATC  
>Alligator-mir-1397-3p  
ATGTAACCCAACGCAGCATGATA

>Alligator-mir-1416\_pre  
AGTGATGGCTGACACTCCTTCCTTAACTCATAACCGCTGTGCCTGCCTTCTTTCTTTTACAAATTGTGTGAGTTGAGTTCAGAGTGTGAGTCCAACCC  
>Alligator-mir-1416-5p  
TCCTTAACTCATAACCGCTGTG

>Alligator-mir-1641\_pre  
AGGGCATTTCCTGGGGATTAATGACTGTCTGGGGTCATCATCTCCTCCCAGTTAGTTATTAATCCCCAGGAAATACTTTATAACCTTGATC  
>Alligator-mir\_1641-5p (predicted)  
TGGGGATTAATGACTGTCTGGG

>Alligator-mir-1662\_pre  
GCAGAGCTGTGCTCTATGGGTTTGACATCATCATACTTGGGATGTATGTCACAAAGTCCCAAGAAGGCTGATGTCAGGCCCAAGATTGCTGCCATC  
>Alligator-mir-1662-5p  
TTGACATCATCATACTTGGGA

>Alligator-mir-1677a\_pre  
CTCCAGGCTTGGTCCAATGCTCATTGAAGTCATGGAGAATCTTTACACTGACTTCACTGAGCTTTGGACCAGGTTTCATGAGAA  
>Alligator-mir-1677a-3p  
TGACTTCACTGAGCTTTGGACA

>Alligator-mir-1677b\_pre  
AGCAACTAGGGGCTGATCCAGAGCCCGTTGAAGTCAGCGGGGAGACATTC AAGTGACTTCAGGGGGCTTTGAATGAGGCTCTCAGTGATCACACT  
>Alligator-mir-1677b-5p  
TCCAGAGCCCGTTGAAGTCAG  
>Alligator-mir-1677b-3p  
TGACTTCAGGGGGCTTTGAATGT

>Alligator-mir-1677c\_pre



---

GCAGCACTGTGGGCTTGACCCAGAACCCACTGAAGTTAAGGGCAGAGTCCCCTTAGCTTCTGTGGGCTGTAGGTCAGGCTCCACGTGTTAT  
>Alligator-mir-1677c-5p  
TGACCCAGAACCCACTGAAGTT  
>Alligator-mir-1677c-3p  
CTTCTGTGGGCTGTAGGTCA

>Alligator-mir-1720\_pre  
CTTCTGATCACCTCAGTTGTTGCTTTTGTGAGCATTTTCATGGGAAAGCAACAAGAGGGCAGGTCTGAAACCC  
>Alligator-mir-1720-3p (predicted)  
AAGCAACAAGAGGGCAGGTCTGA

>Alligator-mir-1788\_pre  
GCCCGCCGCGTCTGGGCTTGTTTTCAGTTGCCTGCGGGTTTATTTGGACGACTCAGGCAGCTAAAGCAAGTCTGGGACGGGTGAGGAGA  
>Alligator-mir-1788-5p  
GGCTTGTTTTCAGTTGCCTGCG  
>Alligator-mir-1788-3p  
CAGGCAGCTAAAGCAAGTCTG

>Alligator-mir-1791\_pre  
TGATGCACCATGTTGGGCTGCCTCAGTCATGCCATGTTATGAAACCTAATGCAATGTGACTGATGCAGGCTGACGTGATGTGTCA  
>Alligator-mir-1791-3p  
CAATGTGACTGATGCAGGCTGAC  
>Alligator-mir-1791-5p  
TGGGCTGCCTCAGTCATGCCATG

>Alligator-mir-1805\_pre  
TGGAATATTCTGGGAGTTGTAGTCTTTCAAACAGAGCTTTGCAAGTACATACCTGTATTGGAACACTACAGCTCCCTGAACTTCTTAGTGTCA  
>Alligator-mir-1805-3p  
TGTATTGGAACACTACAGCTCC  
>Alligator-mir-1805-5p  
AGTTGTAGTCTTTCAAACAGA

>Alligator-mir-2184\_pre  
CCCGGTCCC GCCGCCCAACAGTAAGAGTTTATGTGCGGTGAGAGCTGGAATCTGCATGTGAACTCCTACTGCTCCGGGCGGCGGGGCACAGCG  
>Alligator-mir-2184-5p  
AACAGTAAGAGTTTATGTGCGG  
>Alligator-mir-2184-3p  
GCATGTGAACTCCTACTGCTCC

>Alligator-mir-2188\_pre  
GAATATCAGACCCGTGGGAAAGGTCCAACCTCACATGTCTGTATGTACAGGAGGGATATATGTGGTCAGACCTATCCCACAGGCCCTGTATTC  
>Alligator-mir-2188-5p  
AAGGTCCAACCTCACATGTCC  
>Alligator-mir-2188-3p  
ATATATGTGGTCAGACCTATC

>Alligator-mir-2970\_pre  
CGGGCCTCTTCTGCCACTGCAGACAGTCAGCAGTTGGTCTGGCGTGAGCAGCATTTCTCAGATCACCTCTTGGCTGTGGGTGGTGCAGAGAGCGCC  
>Alligator-mir-2970-5p  
GACAGTCAGCAGTTGGTCTG  
>Alligator-mir-2970-3p  
AGATCACCTCTTGGCTGTGGG

>Alligator-mir-2984\_pre  
TGCTTTACCTGTGGCTCCTACTGTGAGTGAAATTGAGTAGGATCAGGTGATCCTAGTCAATTTCACTCGCAGCAGGTCTTGGGGATAAAGCC  
>Alligator-mir-2984-3p (predicted)  
AATTTCACTCGCAGCAGGTCTG

---

>Alligator-mir-3064\_pre  
GTTTATCTTTGATTTGGCTGTTGTGGTGTGCAAAACTTTGTGCGTTGCTTTTTGCCACACTGCAACACTTTACAGATGTGGAAGATGTGA  
>Alligator-mir-3064-3p  
TTGCCACACTGCAACACTTTAC

>Alligator-mir-3618\_pre  
GAATGCATTGTGATTTCCAATAATTGAGACAGTGATTCTGAAAGCTGTCTACATTAATGAAAAGAACAATGTAGTCA  
>Alligator-mir-3618-3p (predicted)  
TGTCTACATTAATGAAAAGAAC

>Alligator-novel-1\_pre  
CTTCCCTTCTCCCCCCTTTCAAAATTCTAGATCTGCCTATGGGCATGGGTAGTACTAGGATTTTGGAAAGGGGGTGGGAGGGCAC  
>Alligator-novel-1-5p  
CTTTCAAAATTCTAGATCTGCC  
>Alligator-novel-1-3p  
TAGTACTAGGATTTTGGAAAGGG

>Alligator-novel-2\_pre  
CTTTGGCAAATACCTGGTCATTACCAAGGCTGCTAGGAAAACACTGTTTCTAGTATGCTGTGGACATGACCATAAAGAGAATCCAT  
>Alligator-novel-2-5p  
CTGGTCATTACCAAGGCTGCTA  
>Alligator-novel-2-3p  
TATGCTGTGGACATGACCATA

>Alligator-novel-8\_pre  
TCAGAGGAAGGCAGGGTAGCTTTGCACCTTACAGACTAACCAAAGTAGACATATTGGTTAATCTATAGGTGCAAATCGACCTTGCCTTCTATTTGA  
>Alligator-novel-8-5p  
GCTTTGCACCTTACAGACTAACC  
>Alligator-novel-8-3p  
TTAATCTATAGGTGCAAATCGA

>Alligator-novel-9\_pre  
GGTTGGGAGAGGTTTTAGACAAGCTGTTGAGCCCAGTGGAAGAGCACTTCATGGCCAATAGTTTTGTCTAAAATCTCTCCCAACC  
>Alligator-novel-9-5p  
TTTAGACAAGCTGTTGAGCCCAG  
>Alligator-novel-9-3p  
ATGGCCAATAGTTTTGTCTAAAAT

>Alligator-novel-10\_pre  
GGTGTGAGGAAGCAGTGGACAATGAAGAATGCAGTGCAACAACAGTAAGTGCATGTCTCATTGTCCATTGCTTCCTGATGTC  
>Alligator-novel-10-5p  
CAGTGGACAATGAAGAATGCA  
>Alligator-novel-10-3p  
CATGTCTCATTGTCCATTGCTT

>Alligator-novel-13\_pre  
GGGGTCAGGAGGGCAGGGCAGCCTGACTCGCAGCAGAGAGCTGATGCCTGTACCTGTGCTGAGGGTCAGGCTGGACTGCAGCCACCCTGGCTCG  
>Alligator-novel-13-5p  
GGGCAGCCTGACTCGCAGCAGA  
>Alligator-novel-13-3p  
TGCTGAGGGTCAGGCTGGACTG

>Alligator-novel-14\_pre  
ACACATCCTTGGCAATATCTGGGGCACATCTCTAGAAGCAGGAATAGTCAGGATGCTCTGCTTCTAGTGACTTGCCTTGGAGATTGCTGGAGGT  
>Alligator-novel-14-5p  
TGGGGCACATCTCTAGAAGC

---

>Alligator-novel-14-3p  
TTCTAGTGACTTGCCTTGGAGA

>Alligator-novel-15\_pre  
CTGGAGGGGGAGCAGCAAGGACTAGGGACCCAAGAGACAGAGAATTAATTTCTTGGTACTCCTGCCCTTGCAGATTGTGAATGCCCTGG

>Alligator-novel-15-5p  
CAGCAAGGACTAGGGACCCAAGA

>Alligator-novel-15-3p  
TTGGTACTCCTGCCCTTGCAG

>Alligator-novel-16\_pre  
GTCCCAAATACACTGCTGGAGTCAGTGGGTACAAGTCTGTGGAGCTGATAGAGTTGTACATGTTGACACAAGCAGTGAATTTGGCCG

>Alligator-novel-16-5p  
TGGAGTCAGTGGGTACAAGTCT

>Alligator-novel-16-3p  
AGTTGTACATGTTGACACAAGC

>Alligator-novel-18\_pre  
GTGGAATGCAGAGGCAAGGATTTCTTAGGGTGATATCTTTTAATTATCTTTTCTTATCACTCTAATAAAATCCTTGCCCTTCGACACCAT

>Alligator-novel-18-5p  
CAAGGATTTCTTAGGGTGAT

>Alligator-novel-18-3p  
TCACTCTAATAAAATCCTTGCC

>Alligator-novel-20\_pre  
CTCACTGTTCCCTTCTCTGTTCTTTTGCATCTTTCAGACCAGGATGAAAGAGCAGCAGAACTCAGCAGGGAGCAGAATGAG

>Alligator-novel-20-5p  
CTCTGTTCTTTTGCATCTTTCA

>Alligator-novel-20-3p  
AAAGAGCAGCAGAACTCAGCAG

>Alligator-novel-21\_pre  
CAGGTCCCTTCTGGTTCTACACTTCTATGATTCTGTAAAAGGGGAATCATAGGCTTGGAGAATGGCAAGGGGTCAG

>Alligator-novel-21-5p  
GGTTCTACACTTCTATGATTCT

>Alligator-novel-21-3p  
AATCATAGGCTTGGAGAATGGCA

>Alligator-novel-27\_pre  
CTGGGTTGCCTGTGAGTCCATGCTCAGCTCTCATGTTTCTCCAGCACAGGGGCTGCTCCATGGAAGCAAAGGCTCT

>Alligator-novel-27-5p  
GAGTCCATGCTCAGCTCTCATG

>Alligator-novel-27-3p  
CAGGGGCTGCTCCATGGAAGCA

>Alligator-novel-35\_pre  
TAACCTTGTGTGACAGTAACTCCTTCTAGGAACATGTGCATCCAGCTTTCAGGAGGCTGTCTGTTCACACCAGGAAA

>Alligator-novel-35-5p  
TGTGACAGTAACTCCTTCTAGG

>Alligator-novel-35-3p  
CCAGGAGGCTGTCTGTTCACACCA

>Alligator-novel-36\_pre  
CTGTAGGAGTTTCTACCAGTACAGCTGTGCCAGTGAGGGCCTGAAGTGGTGTGATTCTTGACTGACATTGCTGTGCTAGCAGAAGCTCCTAGTA

>Alligator-novel-36-5p  
CAGTACAGCTGTGCCAGTGAGG

>Alligator-novel-36-3p

TGACTGACATTGCTGTGCTAGCA

>Alligator-novel-39\_pre

ACGAAGCAGGTATACTTAACTTCTGCTCTTCTTTTCATTNCATGTCTAACATTCCATGAAAGAAGGGTAGGAGTTGAGTACACNTGCTTCATCTGT

>Alligator-novel-39-5p

TTAACTTCTGCTCTTCTTTCA

>Alligator-novel-39-3p

AAAGAAGGGTAGGAGTTGAGTAT

>Alligator-novel-41\_pre

CTGCTCCTTGCTTTTTTCTGCAACAGGTGCCAGTTCAGTCTGTAGTTTCTGTGGAAGTGGCGTCCGTTGCAGGGATGTGCGGGGAGCGTCC

>Alligator-novel-41-5p

TTCTGCAACAGGTGCCAGTTC

>Alligator-novel-41-3p

ACTGGCGTCCGTTGCAGGGAT

>Alligator-novel-42\_pre

GCAGCACTGTGGGCTTGACCCAGAACCCACTGAAGTTAAGGGCAGAGTCCCGTTAGCTTCTGTGGGCTGTAGGTCAGGCTCCACGTGTTAT

>Alligator-novel-42-5p

TGACCCAGAACCCACTGAAGTT

>Alligator-novel-42-3p

CTTCTGTGGGCTGTAGGTCA

---

>Columba-let-7a-1\_pre  
CTGTGCTGTGGGATGAGGTAGTAGGTTGTATAGTTTTAGGGTCATACCCGCAACTGGGAGATAACTATAACAATCTACTGTCTTTTCCTAAAG

>Columba-let-7a-1-5p  
TGAGGTAGTAGGTTGTATAGTT

>Columba-let-7a-1-3p  
CTATAACAATCTACTGTCTTTTC

>Columba-let-7a-2\_pre  
TGCATCCAGGTTGAGGTAGTAGGTTGTATAGTTTTAGAATTACACCAAGGGAGATAACTGTACAACCTCCTAGCTTTTCCTT

>Columba-let-7a-2-5p  
TGAGGTAGTAGGTTGTATAGTT

>Columba-let-7a-2-3p  
CTGTACAACCTCCTAGCTTTTCC

>Columba-let-7a-3\_pre  
GTCCTTTGGGGTGAGGTAGTAGGTTGTATAGTTTTAGGGCTCTGCCCTGCCTGTACATAACTATAACAATCTACTGTCTTTTCCTGAAGTGG

>Columba-let-7a-3-5p  
TGAGGTAGTAGGTTGTATAGTT

>Columba-let-7a-3-3p  
CTATAACAATCTACTGTCTTTTC

>Columba-let-7a-4\_pre  
AGGTGAGGTAGTAGGTTGTATAGTTTTGGTGGGAGGGATTTGATCCCATTTTCAGGTGATAACTATAACAGTCTATTGCCTTCCTTAA

>Columba-let-7a-4-5p  
TGAGGTAGTAGGTTGTATAGTT

>Columba-let-7a-4-3p  
CTATAACAGTCTATTGCCTTCCCT

>Columba-let-7b\_pre  
GGATGAGGTAGTAGGTTGTGTGGTTTTTCAGGGTAGTGATTTTTGCCCCAGTCAGGAGATAACTATAACAACCTACTGCCTTCCCTGATAAGCAGCATAA

>Columba-let-7b\_5p  
TGAGGTAGTAGGTTGTGTGGTTTT

>Columba-let-7b-3p  
CTATAACAACCTACTGCCTTCC

>Columba-let-7c\_pre  
GCATCCGGGTTGAGGTAGTAGGTTGTATGGTTTTAGAGTTACACCCTGGGAGTTAACTGTACAACCTTCTAGCTTTTCCTTGGAGCA

>Columba-let-7c-5p  
TGAGGTAGTAGGTTGTATGGTT

>Columba-let-7c-3p  
CTGTACAACCTTCTAGCTTTTCC

>Columba-let-7d\_pre  
TAGGAAGAGGTAGTAGGTTGCATAGTTTTAGGGCAGGGATTTTTGCTCACAAGGAGGTAACTATAACAACCTGCTGCCTTTCTTAGGGC

>Columba-let-7d-5p  
AGAGGTAGTAGGTTGCATAGTT

>Columba-let-7d-3p  
CTATAACAACCTGCTGCCTTTCT

>Columba-let-7e\_pre  
CTGTCTTTGAGGCTGAGGTAGTAGATTGAATAGTTGTGGAGTCCGATCCTCCCTTTGAGCAAACCTATAACAATCTACTGTCTTTTCCTAAGGAGA

>Columba-let-7e-5p  
TGAGGTAGTAGATTGAATAGTT

>Columba-let-7e-3p  
CTATAACAATCTACTGTCTTTTCC

>Columba-let-7f\_pre

TTCTCTGTCAGAGTGAGGTAGTAGATTGTATAGTTGTAGGGTAGTTATTTTTACCCTGTTTCAGGAGATAACTATAACAATCTATTGCCTTCCCTGCGG  
>Columba-let-7f-5p  
TGAGGTAGTAGATTGTATAGTT  
>Columba-let-7f-3p  
CTATAACAATCTATTGCCTTCCC

>Columba-let-7g\_pre  
TTCTTGCCTGATTCCAGGCTGAGGTAGTAGTTTGTACAGTTTGTAGGGTCTATGATACCACCCGGTACAGGAGATAACTGTACAGGCCACTGCCTTG  
>Columba-let-7g-5p  
TGAGGTAGTAGTTTGTACAGTT  
>Columba-let-7g-3p  
CTGTACAGGCCACTGCCTTGCC

>Columba-let-7i\_pre  
CTGGCTGAGGTAGTAGTTTGTGCTGTTGGTCGGGTTGTGACATTGCCCGCTGTGGAGATAACTGCGCAAGCTACTGCCTTGCTA  
>Columba-let-7i-5p  
TGAGGTAGTAGTTTGTGCTGTTG  
>Columba-let-7i-3p  
CTGCGCAAGCTACTGCCTTGCT

>Columba-mir-1a-1\_pre  
CTGCTTGAGAGACATACTTCTTTTATATGCCCATATGAACCTGGGAAGCTATGGAATGTAAAGAAGTATGTATTTTCAGGTGG  
>Columba-mir-1a-1-3p  
TGGAATGTAAAGAAGTATGTAT  
>Columba-mir-1a-1-5p  
ACATACTTCTTTATATGCCCATA

>Columba-mir-1a-2\_pre  
GTACCTGCCCAGAGTACATACTTCTTTTATGTACCCATATGAACATACAATGCTATGGAATGTAAAGAAGTATGTATTTTTGGCAGGCAT  
>Columba-mir-1a-2-3p  
TGGAATGTAAAGAAGTATGTAT  
>Columba-mir-1a-2-5p  
ACATACTTCTTTATGTACCCATA

>Columba-mir-1b\_pre  
CCTCCCAACCCTACATACTTCTTTCATATACCCATATGGAGTCGGCCGGCGTTATGGAATGTTAAGAAGTATGTATTTTTGGGCTGG  
>Columba-mir-1b-3p  
TGGAATGTTAAGAAGTATGTATT  
>Columba-mir-1b-5p  
TACATACTTCTTTCATATACCCAT

>Columba-mir-7a-1\_pre  
GTTGGTCTAGTTCTGTGTGGAAGACTAGTGATTTTTGTTGTTTTTAGATAACTAAATTTGACAACAAATCGCAGTCTGCCATATAGCACAGACTGTG  
>Columba-mir-7a-1-5p  
TGGAAGACTAGTGATTTTTGTTGTT  
>Columba-mir-7a-1-3p  
CAACAAATCGCAGTCTGCCATA

>Columba-mir-7a-2\_pre  
GGTGGCCAGCTCCCTCTGGAAGACTAGTGATTTTTGTTGTTGTATGGCTCATCCCACCACAACAAGTCACAGTCTGCCCTAGGGTGCCTGGCCTC  
>Columba-mir-7a-2-5p  
TGGAAGACTAGTGATTTTTGTTGTT  
>Columba-mir-7a-2-3p  
CAACAAGTCACAGTCTGCCCTA

>Columba-mir-7a-3\_pre  
GGTGGTCTGGCTCTGCGTGGAAGACTAGTGATTTTTGTTGTTCTGATTTATAAAGGTGACAACAAATCATAGCTGCCACCCAGCCAGACCTGC

---

>Columba-mir-7a-3-5p  
TGGAAGACTAGTGATTTTGTGTT  
>Columba-mir-7a-3-3p  
CAACAAATCATAGCCTGCCACC

>Columba-mir-7b\_pre  
CATCCCCGGGCAGGCTGGAAGACTTGTGATTTTGTGTTTCCAATGTCAACGGGAGCGAACAACAAATCCCAGTCTCCTCCCTGCCCCGGGCAC  
>Columba-mir-7b-5p (predicted)  
TGGAAGACTTGTGATTTTGTGTT

>Columba-mir-9-1\_pre  
TCAGGGGTTGGTTGTTATCTTTGGTTATCTAGCTGTATGAGTGGTGTGCGATTCTTTCATAAAGCTAGATAACCGAAAGTAAAAATAACCCCATTT  
>Columba-mir-9-1-5p  
TCTTTGGTTATCTAGCTGTATGA  
>Columba-mir-9-1-3p  
ATAAAGCTAGATAACCGAAAGTA

>Columba-mir-9-2\_pre  
AGGGAAGTGAGTTGTTATCTTTGGTTATCTAGCTGTATGAGTGTGTTTGGTCTTTCATAAAGCTAGATAACCGAAAGTAAAACTCCTTCAAG  
>Columba-mir-9-2-5p  
TCTTTGGTTATCTAGCTGTATGA  
>Columba-mir-9-2-3p  
ATAAAGCTAGATAACCGAAAGTA

>Columba-mir-9-3\_pre  
ACCTGGGTTGGTTTTTCTCTTTGGTTATCTAGCTGTATGAGTGTATGTGATATCATAAAGCTAGAGAACCGAATGTAAAAACCCGCTCGCTG  
>Columba-mir-9-3-5p  
TCTTTGGTTATCTAGCTGTATG  
>Columba-mir-9-3-3p  
TAAAGCTAGAGAACCGAATGTA

>Columba-mir-10a\_pre  
CTTCTATATGTACCCTGTAGATCCGAATTTGTGTAAAGGAAGTTGGGTCACAAATTCGTATCTAGGGGAATATGTAGTTG  
>Columba-mir-10a-5p  
TACCCTGTAGATCCGAATTTGTG  
>Columba-mir-10a-3p  
CAAATTCGTATCTAGGGGAATA

>Columba-mir-10b\_pre  
TTACGTTGTCTATATATACCCTGTAGAACCGAATTTGTGTGATATTCATATAGTCACAGATTTCGATTCTAGGGGAATATATGGTCGATGAAA  
>Columba-mir-10b-5p  
TACCCTGTAGAACCGAATTTGT  
>Columba-mir-10b-3p  
AGATTCGATTCTAGGGGAATA

>Columba-mir-10c\_pre  
CCCCGTCTCCTATATGTACCCTGTAGACTCGAATTTGTGTGAGCGTCTCCAGTCACAAATTCGTCTCTAGGGGAATATATGGGCGATGCCA  
>Columba-mir-10c-5p  
TACCCTGTAGACTCGAATTTG  
>Columba-mir-10c-3p  
CAAATTCGTCTCTAGGGGAATA

>Columba-mir-15a\_pre  
TTGGCATAACGTAGCAGCACATAATGGTTTGTGGGTTTTGAAAAGGTGCAGGCCATATTGTGCTGCCTCAAAAATACAA  
>Columba-mir-15a-5p  
TAGCAGCACATAATGGTTTGTG  
>Columba-mir-15a-3p

CAGGCCATATTGTGCTGCCTC

>Columba-mir-15b\_pre

AGGCCTTAAAGTACTCTAGCAGCACATCATGGTTTGCATGCTCTAATAAAGATGCGAATCATTATTTGCTGCTTTAGAAATTTAAGGAAG

>Columba-mir-15b-5p

TAGCAGCACATCATGGTTTGCA

>Columba-mir-15b-3p

CGAATCATTATTTGCTGCTTTA

>Columba-mir-15c\_pre

GGGCTTTGAGGAGATGTAGCAGCACATCATGGTTTGTAGGGACAAGGAGATACAGACCATTCTGGGCTGCCTCATTACCTCAAGGATA

>Columba-mir-15c-5p

TAGCAGCACATCATGGTTTGTA

>Columba-mir-15c-3p

CAGACCATTCTGGGCTGCCTCA

>Columba-mir-16a-1\_pre

TCTGTCATACTTTAGCAGCACGTAAATATTGGTGTAAAGACTGTAAATATCTCCAGTATTAACCTGTGCTGCTGAAGTAAGGCTAG

>Columba-mir-16a-1-5p

TAGCAGCACGTAAATATTGGTGT

>Columba-mir-16a-1-3p

TCCAGTATTAACCTGTGCTGCTGAA

>Columba-mir-16a-2\_pre

TTCCGCCCTAGCAGCACGTAAATATTGGTGTAGTAAAATAAACCTTAAACCCCAATATTATTGTGCTGCTTAAGCGTGG

>Columba-mir-16a-2-5p

TAGCAGCACGTAAATATTGGTGT

>Columba-mir-16a-2-3p

CCCAATATTATTGTGCTGCTTAA

>Columba-mir-16b\_pre

CTGTCAGCAGTGTCTAGCAGCACGTAAATACTGGAGTTTAGGATTGCCTGTTGCTCTCCAGTATTGCATTGCTGCTTTAGTGAGGCTGGAAA

>Columba-mir-16b-5p

TAGCAGCACGTAAATACTGGAGT

>Columba-mir-16b-3p

TCCAGTATTGCATTGCTGCTTT

>Columba-mir-17\_pre

TGCGTCAGAGTAATGTCAAAGTGCTTACAGTGCAGGTAGTGATATATAGAACCCTACTGCAGTGAAGGCACTTGTAGCATTATGTTGACAGC

>Columba-mir-17-5p

CAAAGTGCTTACAGTGCAGGTA

>Columba-mir-17-3p

ACTGCAGTGAAGGCACTTGTAGC

>Columba-mir-18a\_pre

AGTGCTTTTTTGTACTAAGGTGCATCTAGTGCAGATAGTGAAGTAGATTAGCATCTACTGCCCTAAGTGCTCCTTCTGGCATAAGAAGTTAT

>Columba-mir-18a-5p

TAAGGTGCATCTAGTGCAGATA

>Columba-mir-18a-3p

ACTGCCCTAAGTGCTCCTTCTGGC

>Columba-mir-18b\_pre

GTTCTTGTGTTAAGGTGCATCTAGTGCAGTTAGTGAAGTAGCGTAGAATCTACTGCCCTAAATGCTCCTTCTGGCACAAGCTG

>Columba-mir-18b-5p

TAAGGTGCATCTAGTGCAGT

>Columba-mir-18b-3p

TGCCCTAAATGCTCCTTCTGGC



---

>Columba-mir-19a\_pre  
TTTGCAGTCTTCTGTTAGTTTTGCATAGTTGCACTACAAGAAGAGTGTAGTTGTGCAAATCTATGCAAAACTGATGGTGGCCTGTTAT  
>Columba-mir-19a-3p  
TGTGCAAATCTATGCAAAACTGA  
>Columba-mir-19a-5p  
GTTAGTTTTGCATAGTTGCACTA

>Columba-mir-19b-1\_pre  
CTCTGGTTAGTTTTGCAGGTTTGCATCCAGCTGTATGATACTCTGCTGTGCAAATCCATGCAAAACTGACTGTGG  
>Columba-mir-19b-1-3p  
TGTGCAAATCCATGCAAAACTGA  
>Columba-mir-19b-1-5p  
AGTTTTGCAGGTTTGCATCCAGC

>Columba-mir-19b-2\_pre  
CAGTGCTAATTACAGTCAGTTTTGCAGGTTTGCATCCCAGCTTACTAAAATTGCTGTGCAAATCCATGCAAAACTGACTGTGGTGGTGGTG  
>Columba-mir-19b-2-3p  
TGTGCAAATCCATGCAAAACTGA  
>Columba-mir-19b-2-5p  
AGTTTTGCAGGTTTGCATCCCAGC

>Columba-mir-20a\_pre  
CTTGTAGCACTAAAGTGCTTATAGTGCAGGTAGTGTTCACCTAATCTACTGCATTATAAGCACTTAAAGTACTGCTAGCTGTAG  
>Columba-mir-20a-5p  
TAAAGTGCTTATAGTGCAGGTA  
>Columba-mir-20a-3p  
ACTGCATTATAAGCACTTAAAGT

>Columba-mir-20b\_pre  
TAGTTTTGTCTAGCAGTATCAAAGTGCTCATAGTGCAGGTAGCTTTGAATTGAACCTACTGTAATGTGGGCACTTATAGTACTGCTAGATAAAGT  
>Columba-mir-20b-5p  
CAAAGTGCTCATAGTGCAGGTAG  
>Columba-mir-20b-3p  
ACTGTAATGTGGGCACTTATAGT

>Columba-mir-21\_pre  
TCCTGTCGGATAGCTTATCAGACTGATGTTGACTGTTGGATCTCATGGCAACAACAGTCGGTAGGCTGTCTGACATTT  
>Columba-mir-21-5p  
TAGCTTATCAGACTGATGTTGA  
>Columba-mir-21-3p  
AACAACAGTCGGTAGGCTGTC

>Columba-mir-22\_pre  
CAGCACCAGTTCTTTCAGTGGCAAGCTTTATGTCTTCTCTAGTAGCTAAAGCTGCCAGTTGAAGAAGTGTGAAAT  
>Columba-mir-22-3p  
AAGCTGCCAGTTGAAGAAGTGT  
>Columba-mir-22-5p  
AGTTCTTTCAGTGGCAAGCTTTA

>Columba-mir-23b\_pre  
GTTGTGGCTGTTTGGGTTCTTGGCATGATGATTTGTGACTTAAGATTTAAATCACATTGCCAGGGATTACCACACAGCCATTAC  
>Columba-mir-23b-3p  
ATCACATTGCCAGGGATTACCACA  
>Columba-mir-23b-5p  
TGGGTTCTTGGCATGATGATTT

---

>Columba-mir-26-1\_pre  
CGGCCTGGTTCAAGTAATCCAGGATAGGCTGTATCCATCCGAGCTGGCCTATTCTTTGGTTACTTGCCTAGGAGG

>Columba-mir-26-1-5p  
TTCAAGTAATCCAGGATAGGCT

>Columba-mir-26-1-3p  
CCTATTCTTTGGTTACTTGCCT

>Columba-mir-26-2\_pre  
CAGTGGCCGGCCCCAGGTTCAAGTAATCCAGGATAGGCTGTGATCTGGGCAGTCAGCCTGTTCTTTGGTTACTTGGCTCTGGAGCTGGCCAGAT

>Columba-mir-26-2-5p  
TTCAAGTAATCCAGGATAGGCT

>Columba-mir-26-2-3p  
CCTGTTCTTTGGTTACTTGGCTC

>Columba-mir-27b\_pre  
GCGAGGTGCAGAGCTTAGCTGATTGGTGAACAGTGATTGTTTTCCCTCTTTGTTTACAGTGGCTAAGTTCTGCACCTGAGGAG

>Columba-mir-27b-3p  
TTCACAGTGGCTAAGTTCTGC

>Columba-mir-27b-5p  
AGAGCTTAGCTGATTGGTGAACA

>Columba-mir-29a-1\_pre  
AGGATGACTGATTTCTTTTGGTGTTCAGAGTCAATAATATTTTCTAGCACCATTTGAAATCGGTTATAGT

>Columba-mir-29a-1-3p  
TAGCACCATTTGAAATCGGTTA

>Columba-mir-29a-1-5p  
ACTGATTTCTTTTGGTGTTCAGA

>Columba-mir-29a-2\_pre  
ATGTCTCTTACACAGGCTGACCGATTTCTCTTTGGTGTTCAGAGTCTCAGTTTTTGTCTAGCACCATTTGAAATCGGTTATGATGTAGGGGGAAA

>Columba-mir-29a-2-3p  
TAGCACCATTTGAAATCGGTTA

>Columba-mir-29b-1\_pre  
CCTCAGGAAGCTGGTTTTCATATGGTGGTTTTAGATTTAACTATTTCATTGTCTAGCACCATTTGAAATCAGTGTCTTTGGAG

>Columba-mir-29b-1-3p  
TAGCACCATTTGAAATCAGTGT

>Columba-mir-29b-1-5p  
GCTGGTTTTCATATGGTGGTTTTAGA

>Columba-mir-29b-2\_pre  
CCTCTGGAAGCTGGTTTTACATGGTGGCTTAGATTTTCCCACTTTGTATCTAGCACCATTTGAAATCAGTGTCTTAGGAG

>Columba-mir-29b-2-3p  
TAGCACCATTTGAAATCAGTGT

>Columba-mir-30a\_pre  
TGAGCGACTGTAAACATCCTCGACTGGAAGCTGTGAAGCAGCAGATGGGGCTTTTCAGTCGGATGTTTGCAGCTGCCAA

>Columba-mir-30a-5p  
TGTAACATCCTCGACTGGAAGCT

>Columba-mir-30a-3p  
CTTTTCAGTCGGATGTTTGCAGC

>Columba-mir-30c-1\_pre  
GTTGTAGCACGTGTAAACATCCTTACACTCTCAGCTGTGAACTGAGGTGGCTGGGAGAGGATTGTTTTACTCCTTCTGCCAT

>Columba-mir-30c-1-5p  
TGTAACATCCTTACACTCTCAGCT

>Columba-mir-30c-1-3p

CTGGGAGAGGATTGTTTACTCC

>Columba-mir-30c-2\_pre

TGACAGGTAAGTAAACATCCTACACTCTCAGCTGTGGAAACTAAGAAAGCTGGGAGAAGGCTGTTTACTCTCCCTGCC

>Columba-mir-30c-2-5p

TGTAACATCCTACACTCTCAGCT

>Columba-mir-30c-2-3p

CTGGGAGAAGGCTGTTTACTCT

>Columba-mir-30d\_pre

CGTGGTCCGGTGTGTAACATCCCCGACTGGAAGCTGTTCCCGTCCAGCTTTCAGTCAGATGTTTGCTGCACCTGGCTGCG

>Columba-mir-30d-5p

TGTAACATCCCCGACTGGAAGCT

>Columba-mir-30d-3p

CTTTCAGTCAGATGTTTGCTGC

>Columba-mir-30e\_pre

GTCCTTGCTGTGTAACATCCTTGACTGGAAGCTGTGAGGTGCGAGCAGGAGCTTTCAGTCGGATGTTTGACAGCAGCAGGCTG

>Columba-mir-30e-5p

TGTAACATCCTTGACTGGAAGCT

>Columba-mir-30e-3p

CTTTCAGTCGGATGTTTGACAGC

>Columba-mir-31\_pre

TGTGCAGAGCTGGAGGGGAGGCAAGATGTTGGCATTAGCTGTAGACCTAAAAACCTGCTATGCCAACATATTGTCATCTTTCCTCTCTGTTTG

>Columba-mir-31-5p

AGGCAAGATGTTGGCATTAGCTGT

>Columba-mir-31-3p

TGCTATGCCAACATATTGTCATC

>Columba-mir-32\_pre

TCTGGTGGAGATATTGCACATTACTAAGTTGCATGTTGTACGGCCTCAGTGCAATTTAGTGTGTGCGATACTTTCACATGAGT

>Columba-mir-32-5p

TATTGCACATTACTAAGTTGCA

>Columba-mir-32-3p

CAATTTAGTGTGTGCGATACT

>Columba-mir-33-1\_pre

CCTGGGTGGCAGCTGTAGTGCATTGTAGTTGCATTGCATGTTGTGGCAGTAACTGTGCAATGTTTCTGCAGTGCAGTACAGAGGCACTCT

>Columba-mir-33-1-5p

GTGCATTGTAGTTGCATTGCA

>Columba-mir-33-1-3p

CAATGTTCTGCAGTGCAGTA

>Columba-mir-33-2\_pre

CCCGGCCCTCGCGGGGTGCATTGTAGTTGCATTGCATGTTGTGAGTGGAGTGCAATGCCCTGCCATGCAGCCCCGGGGGGCCCCG

>Columba-mir-33-2-5p

GTGCATTGTAGTTGCATTGCA

>Columba-mir-33-2-3p

CAATGCCCTGCCATGCAGCC

>Columba-mir-34a\_pre

GTGTTTCTTTGGCAGTGTCTTAGCTGGTTGTTGTGAGCAATAGTCAAGGAAGCAATCAGCAAGTATACTGCCCTAGAAGTGC

>Columba-mir-34a-5p

TGGCAGTGTCTTAGCTGGTTGT

>Columba-mir-34a-3p

CAATCAGCAAGTATACTGCCCT

---

>Columba-mir-34b\_pre  
GTGCTTGGTTTTGTAGGCAGTGTAGTTAGCTGATTGTAACCACTGCTCCGCAATCACTACACTCACTGCCATCAAAAACAAGGCACAGG  
>Columba-mir-34b-5p  
AGGCAGTGTAGTTAGCTGATTGT  
>Columba-mir-34b-3p  
AATCACTACACTCACTGCCATC

>Columba-mir-34c\_pre  
ATCAGCCTAGTTACTAGGCAGTGTAGTTAGCTGATTGCCAAAAGTACCAATCACTAGCCACACAGCCAGGTAAAAAGGCTTGG  
>Columba-mir-34c-5p  
AGGCAGTGTAGTTAGCTGATTGC  
>Columba-mir-34c-3p  
AATCACTAGCCACACAGCCAGG

>Columba-mir-92-1\_pre  
CCTTTCTACACAGGTTGGGATCAGTTGCAATGCTGTGTGTGTCTCTGGTATTGCACTTGTCCC GGCTGTTGAGGTTGGTGG  
>Columba-mir-92-1-3p  
TATTGCACTTGTCCC GGCTGT  
>Columba-mir-92-1-5p  
AGGTTGGGATCAGTTGCAATGCT

>Columba-mir-92-2\_pre  
TGGTTTCTCCATGGGTGGGGATTTGTTGCATTACTTGTAGCTGTATGTAGAGTATTGCACTTGTCCC GGCTGTGGAGGAAATG  
>Columba-mir-92-2-3p  
TATTGCACTTGTCCC GGCTGT  
>Columba-mir-92-2-5p  
GGGTGGGGATTTGTTGCATTACT

>Columba-mir-96\_pre  
GGCCCGTTTTGGCACTAGCACATTTTTGCTTTGATTTGTAGCTTTTTGAGCAATTATGTGTAGTGCCAATATGGGAGAAGGCGGAGA  
>Columba-mir-96-5p  
TTTTGGCACTAGCACATTTTTGCT  
>Columba-mir-96-3p  
CAATTATGTGTAGTGCCAATAT

>Columba-mir-99\_pre  
GATGCCAATTGGCATAAACCCGTAGATCCGATCTTGTGTTGAAACGCACTGCACAAGCTCGCTTCTATGGGTCTGTGTGTCAGTATGGTGATC  
>Columba-mir-99-5p  
AACCCGTAGATCCGATCTTGTG  
>Columba-mir-99-3p  
CAAGCTCGCTTCTATGGGTCTG

>Columba-mir-100-1\_pre  
GCGCCTGTTGCCACAAACCCGTAGATCCGAACTTGTGGTCATATTCCACACAAGCTTGTATCTATAGGTATGTGTCTGTCTGGCAAGTGC  
>Columba-mir-100-1-5p  
AACCCGTAGATCCGAACTTGTG  
>Columba-mir-100-1-3p  
CAAGCTTGTATCTATAGGTATG

>Columba-mir-101-1\_pre  
ACAGGCTGCCCTGGCTCAGTTATCACAGTGTGATGCTGTCTCTTGTAAAGGTACAGTACTGTGATAACTGAAGGATGGCAGCCATC  
>Columba-mir-101-1-3p  
TACAGTACTGTGATAACTGAA  
>Columba-mir-101-1-5p  
CAGTTATCACAGTGTGATGCT

---

>Columba-mir-101-2\_pre  
ACTATGAACTGTCCTTTTTTCGGTTATCATGGTACCGGTGCTGTATACGTGAAAGGTACAGTACTGTGATAACTGAAGAATGGTGGTGCCATCAC  
>Columba-mir-101-2-3p  
GTACAGTACTGTGATAACTGAAG  
>Columba-mir-101-2-5p  
TCGGTTATCATGGTACCGGTGCT

>Columba-mir-103-1\_pre  
TGTCTTACTGTCTTCGGCTTCTTTACAGTGCTGCCTTGTTGCATATGGATCAAGCAGCATTGTACAGGGCTATGAAGGCATTGAGTCT  
>Columba-mir-103-1-3p  
AGCAGCATTGTACAGGGCTATGA

>Columba-mir-103-2\_pre  
TTATCTTTGTGCTTTTCAGCTTCTTTACAGTGCTGCCTTGTTGCGTTCATGTCAAGCAGCATTGTACAGGGCTATGAAAGAGCAGAGACGA  
>Columba-mir-103-2-3p  
AGCAGCATTGTACAGGGCTATGA  
>Columba-mir-103-2-5p  
AGCTTCTTTACAGTGCTGCCTTG

>Columba-mir-106\_pre  
TTGAGTTGTGCAAAAGTGCTTACAGTGCCAGGTAGAGTTTAGGATCTACTGCAGTATAAGCACTTCTGGCAT  
>Columba-mir-106-5p  
AAAAGTGCTTACAGTGCCAGGTAG  
>Columba-mir-106-3p  
ACTGCAGTATAAGCACTTCTGG

>Columba-mir-107\_pre  
GTGTTCTCTTTGCTTTTCAGCTTCTTTACAGTGTTGCCTTGTTGGCATGGAGTTCAAGCAGCATTGTACAGGGCTATCAAAGCATGG  
>Columba-mir-107-3p  
AGCAGCATTGTACAGGGCTAT  
>Columba-mir-107-5p  
AGCTTCTTTACAGTGTTGCCTTG

>Columba-mir-122\_pre  
CTGCCCGAGCTGTGGAGTGTGACAATGGTGTGTTGTGTCCTGGCTATCAAACGCCATTATCACACTAAATAGCTACTGGTAGACA  
>Columba-mir-122-5p  
TGGAGTGTGACAATGGTGTGTTG  
>Columba-mir-122-3p  
AACGCCATTATCACACTAAATA

>Columba-mir-124-1\_pre  
CCAAGGCTCTGACTCTCCGTGTTTCACAGCGGACCTTGATTTAATGTCCATACAATTAAGGCACGCGGTGAATGCCAAGAGCGGATCCTCAA  
>Columba-mir-124-1-3p  
TAAGGCACGCGGTGAATGCCAA  
>Columba-mir-124-1-5p  
CGTGTTCACAGCGGACCTTGA

>Columba-mir-124-2\_pre  
CCCAGCCCCCTCTCTGCGTGTTCACAGCGGACCTTGATTTAATGTCCATACAATTAAGGCACGCGGTGAATGCCAAGAGAGGAGCCTCACA  
>Columba-mir-124-2-3p  
TAAGGCACGCGGTGAATGCCAA  
>Columba-mir-124-2-5p  
CGTGTTCACAGCGGACCTTGAT

>Columba-mir-125-1\_pre  
GTTGCGCCCCCTCTCAATCCCTGAGACCCTAACTTGTGATGTTTAGCTTTTAAATCCACGGGTAGGCTCTTGGGAGCTGTGAGTTGTGCTTT  
>Columba-mir-125-1-5p

---

TCCCTGAGACCCTAACTTGTGA  
>Columba-mir-125-1-3p  
ACGGGTTAGGCTCTTGGGAGCT

>Columba-mir-125-2\_pre  
GGACTTTTCCTAGTCCCTGAGACCCTAACTTGTGAGGTTTTTTTAGCAACAATCACAAGTCAGGCTCTTGGGACCTAGGCGGAGGGG  
>Columba-mir-125-2-5p  
TCCCTGAGACCCTAACTTGTGA  
>Columba-mir-125-2-3p  
ACAAGTCAGGCTCTTGGGACCT

>Columba-mir-126\_pre  
ACCGCTGGTGACGGCCCATTTACTTTTTGGTACGCGCTGTGACACTTCAAACCTCGTACCGTGAGTAATAATGCGCTGTGGCCAGCACG  
>Columba-mir-126-5p  
CATTATTACTTTTTGGTACGCGC  
>Columba-mir-126-3p  
TCGTACCGTGAGTAATAATGCG

>Columba-mir-128-1\_pre  
GAGCTGTTGGATTTCGGGGCCGTAACACTGTCTGAGAGGTTTACATTTCTCACAGTGAACCGGTCTCTTTTTTTCAGCTGCTTCCTG  
>Columba-mir-128-1-3p  
TCACAGTGAACCGGTCTCTTT

>Columba-mir-128-2\_pre  
GTGCAGCTGGAAGGGGGCCGTTTACTGTAAAGAGAGTGAGTAGCAGGTCTCACAGTGAACCGGTCTCTTTTTTCTACTGTGT  
>Columba-mir-128-2-3p  
TCACAGTGAACCGGTCTCTTT  
>Columba-mir-128-2-5p  
GGGGGCCGTTTACTGTAAAGA

>Columba-mir-129\_pre  
TGTCCCTCTCGGGTCTTTTTTGCGGTCTGGGCTTGCTGTTCCCTCCCGCAGCACTCAGGAAGCCCTTACCCCAAAAAGTATCTGCGGGGGGTCA  
>Columba-mir-129-5p  
CTTTTTTGCGGTCTGGGCTTGC  
>Columba-mir-129-3p  
AAGCCCTTACCCCAAAAAGTA

>Columba-mir-130a\_pre  
CTGTCCAGTGCCCTTTTTTATGTTGTACTACTGGTGATCATGCACAAAAAGCAGTGCAATGTTAAAAGGGCATTTGGCCAGCAA  
>Columba-mir-130a-3p  
CAGTGCAATGTTAAAAGGGCAT  
>Columba-mir-130a-5p  
GCCCTTTTTTATGTTGTACTACT

>Columba-mir-130c\_pre  
GTGCTGTTGTCCAGAGCCCTTTTTTCTGTTGTACTACTGGCAATTATGATGAGCAGTGCAATATTTAAAAGGGCATTTGGCTGGCAGAAA  
>Columba-mir-130c-3p  
CAGTGCAATATTTAAAAGGGCAT  
>Columba-mir-130c-5p  
GCCCTTTTTTCTGTTGTACTACT

>Columba-mir-133a-1\_pre  
CTCCAATGCTTTGCTAAAGCTGGTAAAATGGAACCAAATCACCTCTTCAATGGATTTGGTCCCCTTCAACCAGCTGTAGCTATGCATTTGATC  
>Columba-mir-133a-1-3p  
TTTTGGTCCCCTTCAACCAGCTGT  
>Columba-mir-133a-1-5p  
AGCTGGTAAAATGGAACCAAATC

---

>Columba-mir-133a-2\_pre  
TTTGCTAAAGCTGGTAAAATGGAACCAAATCAACTGTTCAATGGATTTGGTCCCCTTCAACCAGCTGTAGCTGT  
>Columba-mir-133a-2-3p  
TTTGGTCCCCTTCAACCAGCTGT  
>Columba-mir-133a-2-5p  
AGCTGGTAAAATGGAACCAAATC

>Columba-mir-133b\_pre  
TATGCTCTGCTCTGGCTGGTCAAACGGAACCAAGCCCATCTTCCTCGGAGGTTTGGTCCCCTTCAACCAGCTATAGCAGTGTGTA  
>Columba-mir-133b-3p  
TTTGGTCCCCTTCAACCAGCTA  
>Columba-mir-133b-5p  
GCTGGTCAAACGGAACCAAGCC

>Columba-mir-133c\_pre  
ATGGTGCGTCCCTGGGGCTGGTAAAAAGGAACCAAGATCAACTTGCAACTGGATTTGGTCCCCTTCAACCAGCTGCAGCGGGCGCATGTG  
>Columba-mir-133c-3p  
TTTGGTCCCCTTCAACCAGCTGC

>Columba-mir-135-1\_pre  
TGCTGTCTTGTATGGCTTTTTATTCCCTATGTGATTATAACATCCCACCTTCATATAGGGATTGAAGCCGTGCAATACACTG  
>Columba-mir-135-1-5p  
TATGGCTTTTTATTCCCTATGTGA  
>Columba-mir-135-1-3p  
ATATAGGGATTGAAGCCGTGCA

>Columba-mir-135-2\_pre  
CTAGTGTTTTATGGCTTTTTATTCCCTATGTGATAGTAATAAAGTCTCATGTAGGGATGGAAGCCATGAAATACATT  
>Columba-mir-135-2-5p  
TATGGCTTTTTATTCCCTATGTGA  
>Columba-mir-135-2-3p  
ATGTAGGGATGGAAGCCATGAA

>Columba-mir-135-3\_pre  
TAAGCCCTCTGCTGTGGTTTTATGGCTTTTTATTCCCTATGTGATTGCTTTTCCCTAACTCATGTAGGGCGAAAAGCCATGGGCTACACAGAGGAGGGA  
>Columba-mir-135-3-5p  
TATGGCTTTTTATTCCCTATGTGA  
>Columba-mir-135-3-3p  
ATGTAGGGCGAAAAGCCATGGG

>Columba-mir-137a\_pre  
CTGACTCTCTTCGGTGACGGGTATTCTTGGGTGGATAATAACGGATTACGTTGTTATTGCTTAAGAATACGCGTAGTCGAGGAGAGTACC  
>Columba-mir-137a-3p  
TTATTGCTTAAGAATACGCGTAG  
>Columba-mir-137a-5p  
ACGGGTATTCTTGGGTGGATAAT

>Columba-mir-137b\_pre  
CCCCTCCCCTTCGGCAACGGGTATTCTCGGGCGGATAATAACGGACGCGCTGTTATTGCTTGAGAATACGCGTAGCCGAGGGGACGCC  
>Columba-mir-137b-3p  
TTATTGCTTGAGAATACGCGTAG  
>Columba-mir-137b-5p  
ACGGGTATTCTCGGGCGGATAAT

>Columba-mir-138-1\_pre  
TCAGGTGCCGTGCAGCAGCTGGTGTGTGAATCAGGCCGTCACCAGTCGGAGAACGGCTACTTCACAACACCAGGGTCGCACCCGACCACA

---

>Columba-mir-138-1-5p  
AGCTGGTGTGTGAATCAGGCCG  
>Columba-mir-138-1-3p  
GCTACTTCACAACACCAGGGT

>Columba-mir-138-2\_pre  
CCCCGATTGGTGCTGCAGCTGGTGTGTGAATCAGGCCGACGACAAGCGCATCCTACTATCCGGCTATTTCACTACACCAGGGTTGCATCATAACC  
>Columba-mir-138-2-5p  
AGCTGGTGTGTGAATCAGGCCG  
>Columba-mir-138-2-3p  
GCTATTTCACTACACCAGGGT

>Columba-mir-139\_pre  
CCAGGCCTGGCTGTATTCTACAGTGCATGTGTCTCCAGTGTGAGTAAGTGAAGTGGAGATGCAGCCCTGTTGGAATAACAACCGGGACCACA  
>Columba-mir-139-5p  
TCTACAGTGCATGTGTCTCCAGT  
>Columba-mir-139-3p  
TGGAGATGCAGCCCTGTTGGAAT

>Columba-mir-140\_pre  
TCCGTGTCCTGCCAGTGGTTTTACCCTATGGTAGGTTACGTCATGCTGTTCTACCACAGGGTAGAACCACGGACGGGATGCTGG  
>Columba-mir-140-3p  
ACCACAGGGTAGAACCACGGAC  
>Columba-mir-140-5p  
CAGTGGTTTTACCCTATGGTAG

>Columba-mir-142\_pre  
GAGACAGTGCAGTCAACCATAAAGTAGAAAGCACTACTAAACAGCACTGCAGGGTGTAGTGTTCCTACTTTATGGATGAGTGTACTGTGGG  
>Columba-mir-142-5p  
CATAAAGTAGAAAGCACTACT  
>Columba-mir-142-3p  
TAGTGTTCCTACTTTATGGA

>Columba-mir-143\_pre  
ATGTCTCCCAGCCCAAGGTGCAGTGTCTGCATCTCTGGTCAATTGGGAGTCTGAGATGAAGCACTGTAGCTCGGGAAGGGAGGAACTGC  
>Columba-mir-143-3p  
TGAGATGAAGCACTGTAGCTC  
>Columba-mir-143-5p  
GGTGCAGTGTCTGCATCTCTGG

>Columba-mir-144\_pre  
CGCTCCCCTGGGCAGGATATCATCGTATACTGTAAGTCGGCTATGAGACACTACAGTATAGATGATGTACTC  
>Columba-mir-144-3p  
TACAGTATAGATGATGTACTC  
>Columba-mir-144-5p  
GGATATCATCGTATACTGTAAGT

>Columba-mir-145\_pre  
CCGTGCCCTCAGGGTCCAGTTTTCCAGGAATCCCTTAGGCGCTACGTTGGGGATTCCCTGGAAATACTGTTCTTGAGGCCACGG  
>Columba-mir-145-5p  
GTCCAGTTTTCCAGGAATCCCT  
>Columba-mir-145-3p  
GGATTCCCTGGAAATACTGTTCTT

>Columba-mir-146a\_pre  
CGTGTATTCTCAGCTTTGAGAAGTGAATTCATGGGTTGTAATTGAATTCGCTGTCAGACCCATGGGGCTCAGTTCCTCAGCTTGGATATTTTC  
>Columba-mir-146a-5p



---

TGAGAACTGAATTCCATGGGTTG  
>Columba-mir-146a-3p  
ACCCATGGGGCTCAGTTCTTCA

>Columba-mir-146b\_pre  
CTGGCTACTTGGCTCTGAGAACTGAATTCCATAGGCATTTAAAGCCTCTAAAAATGCCCTATGGATTTCAGTTCTGCAGCTGGGCAGCAAA  
>Columba-mir-146b-5p  
TGAGAACTGAATTCCATAGGCATT  
>Columba-mir-146b-3p  
TGCCCTATGGATTTCAGTTCTGCAG

>Columba-mir-146c\_pre  
GTTCCCAGCTCTGAGAACTGAATTCCATGGACTGGTTCCAGTTCCATGTGTTTCAGTCCATGGTATTTCAGTTCTCTAGCTTGGCTG  
>Columba-mir-146c-5p  
TGAGAACTGAATTCCATGGACTG  
>Columba-mir-146c-3p  
GTCCATGGTATTTCAGTTCTCTAG

>Columba-mir-147\_pre  
GGTACCCTATGAATCTAGTGGAACTCACTTCTGCACAAACTTGACTACTGAAATCAGTGTGCGGAAATGCTTCTGCTACATTTTTAGGGTCTC  
>Columba-mir-147-3p  
GTGTGCGGAAATGCTTCTGCTA

>Columba-mir-148a\_pre  
GGAGCCTCCGGAAGCAAAGTTCTGTGACACTCCGACTCTGGGTACGATAGCAGTCAGTGCACACTACAGAACTTTGTCTCCGGCGGC  
>Columba-mir-148a-3p  
TCAGTGCACACTACAGAACTTTGT  
>Columba-mir-148a-5p  
AAAGTTCTGTGACACTCCGACT

>Columba-mir-148b\_pre  
GCGCCCGGGCGAGGTTCTGTCTTACACTCCGGCTGTAGCTACAGACAGTCAGTGCATCACAGAACTTGGTCCCGGGAGC  
>Columba-mir-148b-3p  
TCAGTGCATCACAGAACTTGGT  
>Columba-mir-148-5p  
GAGGTTCTGTCTTACACTCCGGCT

>Columba-mir-153a\_pre  
TCTCGCAGCTGCCGGCGTCATTTTTGTGATTTGCAGCTAGTAATCTGGCTCCAGTTGCATAGTACAAAAAGTGATCGTTGGCAGCCGTGCCT  
>Columba-mir-153a-3p  
TTGCATAGTACAAAAAGTGATC  
>Columba-mir-153a-5p  
TCATTTTTGTGATTTGCAGCT

>Columba-mir-153b\_pre  
TTAGCGGTTGCCAGTGTCAATTTTTGTGATGTTGCAGCTAGTAATATGAGCCAGTTGCATAGTACAAAAAGTGATCATTTGGAACTGTGAC  
>Columba-mir-153b-3p (predicted)  
TTGCATAGTACAAAAAGTGATCAT  
>Columba-mir-153b-5p  
GTCATTTTTGTGATGTTGCAGCT

>Columba-mir-155\_pre  
TGTAGGCTGTATGTTGTTAATGCTAATCGTGATAGGGGTTTTTACCTCTGACTGACTCCTACATATTAGCATTAACACTGTATCATGCCTCTT  
>Columba-mir-155-5p  
TTAATGCTAATCGTGATAGGGGT

>Columba-mir-181a-1\_pre

TGTAGTGGTTGCTTCAGTGAACATTCAACGCTGTCGGTGAGTTTGGAAATTAAGTGAAAACCATCGACCGTTGATTGTACCCTCCAGCTAACCATC  
>Columba-mir-181a-1-5p  
AACATTCAACGCTGTCGGTGAGTTT  
>Columba-mir-181a-1-3p  
ACCATCGACCGTTGATTGTACC  
  
>Columba-mir-181a-2\_pre  
ATCTTTGGATAGCTTCAGTGAACATTCAACGCTGTCGGTGAGTTTGGAACTACAAAAACCATCGACCGTTGACTGTACCTTGAGGTTTATCACAA  
>Columba-mir-181a-2-5p  
AACATTCAACGCTGTCGGTGAGTT  
>Columba-mir-181a-2-3p  
ACCATCGACCGTTGACTGTACC  
  
>Columba-mir-181b-1\_pre  
AAAGGTCACAATCAACATTTCATTGCTGTCGGTGGGTTTAACTATGTGGACAAGCTCACTGAACAATGAATGCAACTGTGGCCCCA  
>Columba-mir-181b-1-5p  
AACATTTCATTGCTGTCGGTGGGTT  
>Columba-mir-181b-1-3p  
CTCACTGAACAATGAATGCAA  
  
>Columba-mir-181b-2\_pre  
CTAATGGCTGCAATCAACATTTCATTGCTGTCGGTGGGTTTTCTTTTCTGTCAACTCACTGATCAATGAATGCAAACTGCGGACCAGCC  
>Columba-mir-181b-2-5p  
AACATTTCATTGCTGTCGGTGGGTT  
>Columba-mir-181b-2-3p  
CTCACTGATCAATGAATGCAA  
  
>Columba-mir-182\_pre  
CGGCCCGGGGCTGCTTTTGGCAATGGTAGAACTCACACTGGTGCGGTAGCAGGATCCGGTGGTTCTAGACTTGCCAACCTACAGCCCCGGGGGAG  
>Columba-mir-182-5p  
TTTGGCAATGGTAGAACTCACACT  
>Columba-mir-182-3p  
TGGTTCTAGACTTGCCAACCT  
  
>Columba-mir-183\_pre  
TACTCCTGTTCTGTGTATGGCACTGGTAGAATTCCTGTCGAACCCCGGGTCACTGAAATACCATAGGGCCATAAACAGAGCAGAGAAAG  
>Columba-mir-183-5p  
TATGGCACTGGTAGAATTCCTG  
>Columba-mir-183-3p  
TGAATACCATAGGGCCATAAA  
  
>Columba-mir-184\_pre  
GGCCATTCTCATCTCCTTATCACTTTTCCAGCCCAGCTTCTTCACTGTAACCTGTTGGACGGAGAAGTATAAGGGTATGCGAGTGACA  
>Columba-mir-184-3p  
TGGACGGAGAAGTATAAGGGT  
>Columba-mir-184-5p  
CCTTATCACTTTTCCAGCCCAGC  
  
>Columba-mir-187\_pre  
TATTGTGAGACCTCCGGCTACAACACAGGACATGGGAGCTTTTCTGAACCCCTCGTGTCTTGTGTTGCAGCCAGAGGGGCACATCT  
>Columba-mir-187-3p  
TCGTGTCTTGTGTTGCAGCCA  
>Columba-mir-187-5p  
GCTACAACACAGGACATGGGAG  
  
>Columba-mir-190\_pre  
TCTGCAGGACTCTGTGTGATATGTTGATATATTAGGTTGTTATTTAATCCAACCTATATATCAAACATATTCTACAGTGTCTGCCCT

---

>Columba-mir-190-5p  
TGATATGTTTGATATATTAGGTT  
>Columba-mir-190-3p  
ACTATATATCAAACATATTCCT

>Columba-mir-193\_pre  
GGTTCCAGAGTCGGGGTTTTGGGGGCGAGATGAGCTTATGTTTTATCCAACCTGGCCCACAAAGTCCCCTTTTTGGTGGTC  
>Columba-mir-193-3p  
AACTGGCCCACAAAGTCCCCT  
>Columba-mir-193-5p  
CGGGGTTTTGGGGGCGAGATGA

>Columba-mir-194\_pre  
CATGGGCGCTCTCAGATGTAACAGCAACTCCATGTGGACTACACTGACTTCCAGTGGAGATGCTGTTACTTTTTGATAGCCTCTCA  
>Columba-mir-194-5p  
TGTAACAGCAACTCCATGTGGAC  
>Columba-mir-194-3p  
CCAGTGGAGATGCTGTTACTTT

>Columba-mir-196-1\_pre  
CTCTGTGAATTAGGTAGTTTTTCATGTTGTTGGGCTTTTAAATTTTAAACACAAGAACATCAAACCTACCTGATTTACTCC  
>Columba-mir-196-1-5p  
TAGGTAGTTTTTCATGTTGTTGGG  
>Columba-mir-196-1-3p  
CAAGAACATCAAACCTACCTGAT

>Columba-mir-196-2\_pre  
TGCAGCTGATCTGTGGTTTTAGGTAGTTTTTCATGTTGTTGGGATTGGCTTTTAGCTCGGCAACAAGAACTGCCTTAATTACGTCAGTTAGTCT  
>Columba-mir-196-2-5p  
TAGGTAGTTTTTCATGTTGTTGGG

>Columba-mir-196-3\_pre  
GAGAACTGCTCTGTGGTTTTAGGTAGTTTTTCATGTTGTTGGGGCTCCACCTTTCTCTCTACAGCACGAAACTGCCTTAATTACTTCAGTTGAT  
>Columba-mir-196-3-5p  
TAGGTAGTTTTTCATGTTGTTGGG  
>Columba-mir-196-3-3p  
CTACAGCACGAAACTGCCTTAA

>Columba-mir-199-1\_pre  
AGATCCTGCTCCGTCGCCCCAGTGTTTCAGACTACCTGTTTCAGGACAATGCTGTTGTACAGTAGTCTGCACATTGGTTAGACTGGGCAAGGGAAA  
>Columba-mir-199-2\_pre  
CTCCGTCTGCCAGTGTTTCAGACTACCTGTTTCAGGACTACGAGATTGTACAGTAGTCTGCACATTGGTTAGGCTGTGC  
>Columba-mir-199-1-3p  
TACAGTAGTCTGCACATTGGTTA  
>Columba-mir-199-1-5p  
CCCAGTGTTTCAGACTACCTGTTTC

>Columba-mir-200a\_pre  
CCATGGTCTCTGTGGGCATCTTACTAGACAGTGCTGGATTTTTTTGGATCTACTCTAACACTGTCTGGTAACGATGTTTAAAGGGTGAACCAAAC  
>Columba-mir-200a-3p  
TAACACTGTCTGGTAACGATGTT  
>Columba-mir-200a-5p  
CATCTTACTAGACAGTGCTGGA

>Columba-mir-200b\_pre  
CCTGAGATGCCATTACCATCTTACTGGGCAGCATTGGATGTTTTCTGTCTTTCTAATACTGCCTGGTAATGATGATTATGGTGTTCGTG  
>Columba-mir-200b-3p

---

TAATACTGCCTGGTAATGATGAT  
>Columba-mir-200b-5p  
CATCTTACTGGGCAGCATTGGA

>Columba-mir-202\_pre  
TGACTCGTTGTTCCCTTTTCCCTATGCATATACTTCTTTGAGAATTTGATCTAAAGAGGCATAGGGCATGGGAAAATGGGGCGACTGAGGTA  
>Columba-mir-202-5p  
TTCCTATGCATATACTTCTTT

>Columba-mir-204-1\_pre  
TCATGTGACCCGTGGACTTCCCTTTGTGCATCCTATGCCTGAGAATATATGAAGGGGGCTGGGAAGGCAAAGGGACGTTCAACTGTCATCACTGG  
>Columba-mir-204-1-5p  
TTCCTTTGTGCATCCTATGCCT  
>Columba-mir-204-1-3p  
GCTGGGAAGGCAAAGGGACGT

>Columba-mir-204-2\_pre  
TGTGGGCTTCCCTTTGTGCATCCTATGCCTGGAGATCACAGTGAGGCAGGGACAGCAAAGGGATGCTCAGCTGTCGTC  
>Columba-mir-204-2-5p  
TTCCTTTGTGCATCCTATGCCT  
>Columba-mir-204-3p  
GCAGGGACAGCAAAGGGATGC

>Columba-mir-204-3\_pre  
CCCCCTGTGAGCTTCCCTTTGTGCATCCTATGCCTGAGCCATGGCCGAGGCTGGGACGGTGAAGGGAGGCCACGGGCTG  
>Columba-mir-204-3-5p  
TTCCTTTGTGCATCCTATGCCT  
>Columba-mir-204-3-3p  
GCTGGGACGGTGAAGGGAGGC

>Columba-mir-205a\_pre  
CAATCCATGGGTTCTGTTGTCTTTCATTCCACCGGAGTCTGTCTCATACTAAACCAGATTTTCAGTGGAGTGAAGTACGAGAGACATGGAGAT  
>Columba-mir-205a-5p  
TCCTTCATTCCACCGGAGTCTG  
>Columba-mir-205a-3p  
GATTTTCAGTGGAGTGAAGTACG

>Columba-mir-205b\_pre  
CTTGGCACCTTTCATTCCACCGGAATCTGTCTATAACAGAAACCAGATTTTCAGTGAAATGAAGCCTGTCAGAGAGGCAG  
>Columba-mir-205b-5p  
CCCTTCATTCCACCGGAATCTG  
>Columba-mir-205b-3p  
GATTTTCAGTGAAATGAAGCCTG

>Columba-mir-206\_pre  
TTCTCTTATGAGATTACATGCTTCTTTATATCCCCATAGGGATTAGGCTGCTATGGAATGTAAGGAAGTGTGTGGTTTCAGGGAGA  
>Columba-mir-206-3p  
TGGAATGTAAGGAAGTGTGTGG  
>Columba-mir-206-5p  
ACATGCTTCTTTATATCCCCATA

>Columba-mir-210\_pre  
CCCTCCAGGAGCAGGTGAGCCACTGACTAACGCACATTTGTGCTCTCGGGCACTCCACTGTGCGTGTGACAGCGGCTAACCTGCTCCTCGGACAT  
>Columba-mir-210-3p  
CTGTGCGTGTGACAGCGGCTAA  
>Columba-mir-210-5p  
AGCCACTGACTAACGCACATTTG

---

>Columba-mir-214\_pre  
GGAGTTGTCATGTGTCTGCCTGTCTACACTTGCTGTGCAGAACATCCTCTCACCTGTACAGCAGGCACAGACAGGCAGTCGCATGACAACCCAGC  
>Columba-mir-214-3p  
ACAGCAGGCACAGACAGGCAGT  
>Columba-mir-214-5p  
TGCCTGTCTACACTTGCTGTGC

>Columba-mir-215\_pre  
ACTGGTGTCCAGGAAAATGACCTATGAATTGACAGACTGCTTTCTAAACTTGCCCTGTCAATTTCTATAGGCCAATATTCTGCACACTTTC  
>Columba-mir-215-5p  
ATGACCTATGAATTGACAGACT  
>Columba-mir-215-3p  
CCTGTCAATTTCTATAGGCCAATA

>Columba-mir-216a\_pre  
ACGGCTGTGAATTGGCTTAATCTCAGCTGGCAACTGTGAGCCGCTAATAACTCTCTCACAGTGGTATCTGGGATTATGCTAAACACAGCGAT  
>Columba-mir-216a-5p  
TAATCTCAGCTGGCAACTGTGA  
>Columba-mir-216a-3p  
CACAGTGGTATCTGGGATTATG

>Columba-mir-216b\_pre  
GTCGCAGACTGGGAAATCTCTGCAGGCAAATGTGATGTCTTTATAGCAATCTCACAATTACCTGTAGAGATTCTACAATCTGGCACC  
>Columba-mir-216b-5p  
AAATCTCTGCAGGCAAATGTGA  
>Columba-mir-216b-3p  
ACAATTACCTGTAGAGATTCTA

>Columba-mir-217\_pre  
TTTGATGTGTCAGATACTGCATCAGGAACTGATTGGATAATAATCAGTCACCATCAGTTCCCTAATGCATTGCCTTCAGCATCTAA  
>Columba-mir-217-5p  
ATACTGCATCAGGAACTGATTG  
>Columba-mir-217-3p  
ATCAGTTCCCTAATGCATTGCCT

>Columba-mir-218-1\_pre  
TAATGTAGCGAGATTTTCTGTTGTGCTTGATCTAACCATGTGGTTGTGAGGTATGAGTAAAACATGGTTCTGTCAAGCACCATGGAACGTCACGCA  
>Columba-mir-218-2\_pre  
GTTTGTGGGGTTTTCTTTGTGCTTGATCTAACCATGTGGTGTAGAACAAATACAAATGGAACATGGTTCTGTCAAGCACCATGGAAGGCTGCATACTC  
>Columba-mir-218-5p  
TTGTGCTTGATCTAACCATGT  
>Columba-mir-218-3p  
ATGGTTCTGTCAAGCACCATG

>Columba-mir-219\_pre  
GGAATCTCCGCTCCTGATTGTCCAAACGCAATTCTTGTGCGATGGAGCCGTACGAACCAAGAATTGTGTCTGGACATCTGTAGCAGAGATTTTC  
>Columba-mir-219-3p  
AGAATTGTGTCTGGACATCTGT  
>Columba-mir-219-5p  
TGATTGTCCAAACGCAATTCTTG

>Columba-mir-221\_pre  
TGGGGCATGAACCTGGCATAACAATGTAGATTTCTGTGTTTGTAAAGCAACAGCTACATTGTCTGCTGGGTTTCCAGC  
>Columba-mir-221-3p  
AGCTACATTGTCTGCTGGGTTT  
>Columba-mir-221-5p

ACCTGGCATAACAATGTAGATTT

>Columba-mir-222a\_pre

TGTAGTTGCTCATCAATCGCTCAGTAGTCAGTGTAGATCCTGTCTTTACAATCAGCAGCTACATCTGGCTACTGGGTCTCTGATGACAACTCGT

>Columba-mir-222a-3p

AGCTACATCTGGCTACTGGGTCTC

>Columba-mir-222a-5p

CGCTCAGTAGTCAGTGTAGATCC

>Columba-mir-222b\_pre

CAATGGTGCTCTTGGCTGCTCAGTAGTCGGTGTAGGATCTGTCTGACAGTCTCGCTAACAGCTACATCTGATTACTGGGTACACAAAGGGTGACCA

>Columba-mir-222b-3p

AGCTACATCTGATTACTGGGTCACT

>Columba-mir-223\_pre

AGCGCGGTGCCGCGCTGCGTGTATTTGACAAGCTGAGTCCGACACTCAGTGCAGAGAGTGTGAGTTTGTCAAATACCCCAAGCGAGGCACTGCTGA

>Columba-mir-223-3p

TGTCAGTTTGTCAAATACCCCA

>Columba-mir-223-5p

CGTGTATTTGACAAGCTGAGTCC

>Columba-mir-301a\_pre

CTGCTAACGAACGCTCTGACTTTATTGCACTACTGTACTTCCCAGCTAGCAGTGCAATAGTATTGTCAAAGCATCCGAAAGCAG

>Columba-mir-301a-3p

CAGTGCAATAGTATTGTCAAAGCAT

>Columba-mir-301a-5p

GCTCTGACTTTATTGCACTACT

>Columba-mir-301b\_pre

GCTGGTATCGCTGGCTCTGACAATGTTGCACTACTGTCTGCACAAATAAAGCAGTGCAATAATATTGTCAAAGCATTTGGTTCCAGTCCCT

>Columba-mir-301b-3p

CAGTGCAATAATATTGTCAAAGC

>Columba-mir-301b-5p

TCTGACAATGTTGCACTACT

>Columba-mir-302a\_pre

CCATAACTTAAATGTGGATGTACTTGTCTTGTTCCTGAAAAGTAAGTGCTTCCATGTTTTGGTGATGG

>Columba-mir-302a-3p (predicted)

AAGTGCTTCCATGTTTTGGTGAT

>Columba-mir-302b-1\_pre

CTTTTACTTTAACATGGAGGTGCTTTCTGTGACTTAAAAGAAGTAAGTGCTTCCATGTTTTAGTAGAGG

>Columba-mir-302b-2\_pre

CCTCTACTTTAACATGGGAGGTACTTGTCTGGATGCCTAAAAAAGTAAGTGCTTCCATGTTTTAGTTGTGG

>Columba-mir-203b\_3p

AAGTGCTTCCATGTTTTAG

>Columba-mir-302c\_pre

TAATGGGACTCCCTTTGCTTTAACATGGAGGTACCTGCTGCTTAGAAAAGTAAGTGCTTCCATGTTTTCAGTGGCGGTGGATCCTAATT

>Columba-mir-302c-3p

AAGTGCTTCCATGTTTTCAGTGG

>Columba-mir-338a\_pre

AATGTTTTACTTCTAGCAACACTATCCTGATGCTGTGAGAGTAAGTGGTAAAGCTCCAGCATCAGTGATTTTGTGTAGTGGTAAATTCA

>Columba-mir-338a-3p

TCCAGCATCAGTGATTTTGTGT

>Columba-mir-338a-5p

AACTATCCTGATGCTGTCAGAGT

>Columba-mir-338b\_pre

ACTGCTGCTCCTCCTGCCCAACAATATCCTGGTGTGAGTGAGTTGCAGACAGAGACTCCAGCATCAGTGATTTTGTGAGGAGGGGGTGCAGTGC

>Columba-mir-338b-3p

TCCAGCATCAGTGATTTTGTGTTGA

>Columba-mir-338b-5p

AACAATATCCTGGTGTGAGTA

>Columba-mir-363\_pre

TTTGTGTTGCTGTTGTGCGGGTGGATCACGATGCAATTTTGTATTAGTTTAGTAGGAGAAAAATTGCACGGTATCCATCTGTAAACCGCAAGACCTT

>Columba-mir-363-3p

AATTGCACGGTATCCATCTGT

>Columba-mir-363-5p

GGGTGGATCACGATGCAATTTT

>Columba-mir-365-1\_pre

ACCGCAGGGAAAAATGAGGGACTTTTGGGGCAGATGTGTTTCCATTACACTATCATAATGCCCTAAAAATCCTTATTGCTCTTGCAGT

>Columba-mir-365-1-3p

TAATGCCCTAAAAATCCTTA

>Columba-mir-365-1-5p

AGGGACTTTTGGGGCAGATGTG

>Columba-mir-365-2\_pre

GCAAGAAAAATGAGGGACTTTTCAGGGGCAGCTGTGTTTGTCTAACCCAGTCATAATGCCCTAAAAATCCTTATTGTTCTTGCAAT

>Columba-mir-365-2-3p

TAATGCCCTAAAAATCCTTAT

>Columba-mir-365-2-5p

GAGGGACTTTTCAGGGGCAGCTGT

>Columba-mir-367\_pre

AGGCTAATACTGTTGCTAATATGCAACTCTGTTGTATAAAAAATTGGAATTGCACCTTTAGCAATGGTGATGGACTG

>Columba-mir-367-3p (predicted)

AATTGCACCTTTAGCAATGGTGA

>Columba-mir-375\_pre

CCTGGCGTCGAGCCCCACGTGCAAGACCTGACCTGAACGTTTTGTTTCGTTTCGGCTCGCGTTAGGCAGGTCCA

>Columba-mir-375-3p

TTTGTTCGTTTCGGCTCGCGTTA

>Columba-mir-375-5p

GCGTCGAGCCCCACGTGCAAGAC

>Columba-mir-383\_pre

ACCTGCTCCTCAGATCAGAAGGTGATTGTGGCTTTGAATAGCTATTAAGCAGCCACAGCACTACCTGGTCAGAAAGAGCAAGT

>Columba-mir-383-5p

CAGATCAGAAGGTGATTGTGGCT

>Columba-mir-383-3p

CCACAGCACTACCTGGTCAGA

>Columba-mir-425\_pre

GAGAGACGGCTTTGGAATGACACGATCACTCCCGCTGAGCGGGCAGCCTGAGGCCATCGGGGATGTCGTGTCTGTCCAAAGCTCTTTTCGGT

>Columba-mir-425-5p

AATGACACGATCACTCCCGCTGAG

>Columba-mir-425-3p

CATCGGGGATGTCGTGTCTGTCC

>Columba-mir-429\_pre

---

AAGTGCCTGCTGATTGCTGTCTTACCAGGCAAAGTTAGATCTAGCTATTTTTGTCTAATACTGTCTGGTAATGCCGTCAATCGCATCGGCAAAA  
>Columba-mir-429-3p  
TAATACTGTCTGGTAATGCCGT  
>Columba-mir-429-5p  
GTCTTACCAGGCAAAGTTAGAT

>Columba-mir-449a\_pre  
ATCTGTGTGGGATGGGATGGCAGTGTGTGTTAGCTGGTTGAAATTCTGACATCAGCTAACATGCAGTTGCTATCCTTTTCCACATACCT  
>Columba-mir-449a-5p  
TGGCAGTGTGTGTTAGCTGGT

>Columba-mir-449b\_pre  
CTGTGTCTGGTAGGCAGTGTACTGCTAGCTGGCTGCCGTATCTGGATGGAGCAGTCACTCCTGCACTGCCACCTGCTGCAGGGCTGG  
>Columba-mir-449b-5p  
AGGCAGTGTACTGCTAGCTGGCTGC  
>Columba-mir-449b-3p  
AGTCACTCCTGCACTGCCACT

>Columba-mir-449c\_pre  
AGAATGTAACAGTCTGGCAGTGCATGTTAGCTGGCTGTTGTGTCTGATGTGTCAACAGCTGCTAGCTGTGCTCCACATTGTTTCATTCAAA  
>Columba-mir-449c-5p  
TGGCAGTGCATGTTAGCTGGCTGTT  
>Columba-mir-449c-3p  
CAGCTGCTAGCTGTGCTCCAC

>Columba-mir-449d\_pre  
GTGTGTGGTGATGAGGCAGTGTATTGTTAGTTAGCTGTTCTTCATACACCAGCAACTGACTTACACTGCCACATCAACACATCACTGAGA  
>Columba-mir-449d-5p  
AGGCAGTGTATTGTTAGTTAGCTG  
>Columba-mir-449d-3p  
GCAACTGACTTACACTGCCACA

>Columba-mir-451\_pre  
GCCGGCGGGAAACCGTTACCATTACTGTGTTTTAGTAATGGTAATGGTTCTGCCGACGGCTGG  
>Columba-mir-451-5p  
AAACCGTTACCATTACTGTGTTTT

>Columba-mir-454\_pre  
TAAGGATGAGACCCTATCAATATTGCCTCTGCTTTTGTGATCAGGGTAGTAGTGAATATTGCTTATAGGGTCTTTTCTTTTGGAGGGTT  
>Columba-mir-454-3p  
TAGTGAATATTGCTTATAGGGTCT  
>Columba-mir-454-5p  
ACCCTATCAATATTGCCTCTGCT

>Columba-mir-455\_pre  
CCCTGGTGTGAGGGTATGTGCCCTTGGACTACATCGTGGAAAGCCAGCACCATGCAGTCCATGGGCATATACACTTGCCTCAAGG  
>Columba-mir-455-5p  
TATGTGCCCTTGGACTACATCGT  
>Columba-mir-455-3p  
TGCAGTCCATGGGCATATACAC

>Columba-mir-456\_pre  
GTGTGTGAGCAGGCATCTTCTCAGCCTACACGTGGATTCCCTAAATCTGCAGGCTGGTTAGATGGTTGTCATGCATTC  
>Columba-mir-456-3p  
CAGGCTGGTTAGATGGTTGTC

>Columba-mir-458\_pre



---

CGTGGTGCAGATGGCAGCGCCATTTCCAGAGCTATAAACAGTCTCATTGTCATAGCTCTTTGAATGGTACTGCCATATGTACCGGA  
>Columba-mir-458-3p  
ATAGCTCTTTGAATGGTACTGC  
>Columba-mir-458-5p  
AGCGCCATTTCCAGAGCTATAA

>Columba-mir-459-pre  
TTAGGTTTTGCACTCAGTAACAAGGATTCATCCTCGTTTTCTGGCAAATAACGGGGAGAATCTTTGTCACTAAGTGCAATTAATAGC  
>Columba-mir-459-5p (predicted)  
TCAGTAACAAGGATTCATCCT

>Columba-mir-460a\_pre  
ACCTGACTTTATAGCACCTGCATTGTACACACTGTGTGATTGACTGGAAATGCACAGCGCATAACAATGTGGATTCTGTAGAAGTCACTC  
>Columba-mir-460a-5p  
CCTGCATTGTACACACTGTGTG  
>Columba-mir-460a-3p  
CACAGCGCATAACAATGTGGATT

>Columba-mir-460b\_pre  
CTCTGGCTCTATAGTGTCTCATTGTACATGCTGTGTGATTTGTACAGTACACAGCGCATGCAATGTGGACATAATGGAGCTCAATT  
>Columba-mir-460b-5p  
TCCTCATTGTACATGCTGTGT  
>Columba-mir-460b-3p  
ACAGCGCATGCAATGTGGACA

>Columba-mir-489\_pre  
GGCTTGGTGGTTCGTATGTATGACGTCATTTACTTGGACTTTTAGGAGTGACATCATATGTACGGCTGCTAAACTGCTG  
>Columba-mir-489-3p  
TGACATCATATGTACGGCTGCT  
>Columba-mir-489-5p  
TGGTTCGTATGTATGACGTCATT

>Columba-mir-490\_pre  
TTCATGGTTCGACACCATGGATCTCCAGGTGGGTCAAGATTTATAGAGATACACCAACCTGGAGGACTCCATGCTGTTGAGCTGTTCA  
>Columba-mir-490-3p  
CAACCTGGAGGACTCCATGCTGT  
>Columba-mir-490-5p  
CCATGGATCTCCAGGTGGGTCA

>Columba-mir-499\_pre  
TTTGAGAGAGCGGCAGTTAAGACTTGTAGTGATGTTTAGATAATGTATTACATGAACATCACTTTAAGTCTGTGCTACTTCTCTCCTC  
>Columba-mir-499-5p  
TTAAGACTTGTAGTGATGTTTA  
>Columba-mir-499-3p  
AACATCACTTTAAGTCTGTGCT

>Columba-mir-551a\_pre  
CTGTGCGTGACCTTGGAAATCAAGTGTAGGTGGAGCCTGTGGCAGCGATCAAGGGCAGCCACACTTGGTTTTCAAGGGTCCGCAGGG  
>Columba-mir-551a-3p  
GCGACCCACACTTGGTTTTCAA  
>Columba-mir-551a-5p  
GAAATCAAGTGTAGGTGGAGCCT

>Columba-mir-551b\_pre  
CCATGGCTCCAGAAATCAAGGGTGGGTAAGACCTCGTCAGCAAAGTTTAAAGGGCAGCCATACTTGGTTTTCAAGGGGCTGTGTGGCTC  
>Columba-mir-551b-3p  
GCGACCCATACTTGGTTTTCAGG

>Columba-mir-551b-5p  
AGAAATCAAGGGTGGGTAAGACCT

>Columba-mir-599\_pre  
ACAGTGTGTTTGATAAGCTGACATGGGACAGGATTTCTTTTCACTGTTGTGTCAGTATATCAAACCTCATAACC  
>Columba-mir-599-3p  
TTGTGTCAGTATATCAAACCTCA

>Columba-mir-737\_pre  
TGGTTTGGGTTGAGTTTTTTTAGGTTTTGATTTTTATTACATCTTTGTACAAAAATCAAACGTAAGAAAAATGCTGCAAAGATAGAT  
>Columba-mir-737-5p (predicted)  
GTTTTTTTAGGTTTTGATTTTT

>Columba-mir-875\_pre  
TTAGTGGTACAATACCTCAGTCTTTTCGGATGTTCTATAAAATTCACCTGGAAATACTGAGGTTGCGTTTCACTGAAC  
>Columba-mir-875-5p  
AATACCTCAGTCTTTTCGGATG  
>Columba-mir-875-3p  
CCTGGAAATACTGAGGTTGCGT

>Columba-mir-1306\_pre  
CAGCCTCCACCACCTCCCCTGCAAACGTCCAGTGACGCAGAGGTAATGGACGTTGGCTCTGGTGGTGATGGACAG  
>Columba-mir-1306-5p  
CCACCTCCCCTGCAAACGTCC  
>Columba-mir-1306-3p  
ACGTTGGCTCTGGTGGTGATG

>Columba-mir-1329\_pre  
GTCTGGTTGTAGAGATACAGTGATCAGGTTACGATGGATTTCTCAAGTAACAACCTCGTAGCTTGATCACGATATCCCTATGACTTGAGAA  
>Columba-mir-1329-5p  
TACAGTGATCAGGTTACGATGGA  
>Columba-mir-1329-3p  
CTCGTAGCTTGATCACGATATC

>Columba-mir-1388\_pre  
AGCGAGAGGCACCTCGAGGACTGTCTAACCTGAGAATGGTGAAATGTAAGGGTCAATCTCAGGTTTCGTCAGCCCATGAGACGCCTTCTCCAG  
>Columba-mir-1388-5p  
AGGACTGTCTAACCTGAGAATG  
>Columba-mir-1388-3p  
ATCTCAGGTTTCGTCAGCCCATG

>Columba-mir-1416\_pre  
GGTTGACTCTCTTTTCCCTTAACTCATGCCGCTGTGCCTTTTTATTTGTTTCAACAATTGTGTGAGTTGAGTACAGAGTGTC  
>Columba-mir-1416-5p  
TCCTTAACTCATGCCGCTGTGC  
>Columba-mir-1416-3p  
ACAATTGTGTGAGTTGAGTACA

>Columba-mir-1451\_pre  
AAGCGCAGGAGCTGCTGCCTCGCACAGGGGCAAGTTACCGCGTTTCAGCTCACCTGCAGTAACTTGCTCCTGTGAGAGGTGGCGGCTCCTGGCTCC  
>Columba-mir-1451-5p  
TCGCACAGGGGCAAGTTACCGC  
>Columba-mir-1451-3p  
AGTAACTTGCTCCTGTGAGAGG

>Columba-mir-1467\_pre  
ACAGGGCAGGTTTTTCTCTCAGCTACGTTCGGTGTAATCCAGAGCAACTCCACTGAGATTACACACCAGAGTAACTGAGAGCAGAATCTGGCCAAC

---

>Columba-mir-1467-3p  
TTCACACCAGAGTAACTGAGAGC

>Columba-mir-1467-5p  
TCTCAGCTACGTCGGTGTAATC

>Columba-mir-1550\_pre  
AGACCTGTGCAGGCTTCAGCTGATGGGGGTGCAGTGCAGTAGCTGTTTATCATGCTTCACTTATCCTGATCACTGGTTTTAAGCTGCACCACCAGGG

>Columba-mir-1550-5p (predicted)  
TGATGGGGGTGCAGTGCAGTA

>Columba-mir-1552\_pre  
CTTGTCTACACGGGAAGTTAGTGCGCGGTAAGCTAGGGTGTGAGTTTGCAGCACGCTAGCTGCTCTGCACTAACTCCCCCTGTGGATGCTGAG

>Columba-mir-1552-5p  
TTAGTGCGCGGTAAGCTAGGGTG

>Columba-mir-1552-3p  
CGCTAGCTGCTCTGCACTAACT

>Columba-mir-1559\_pre  
ACATGAAGGTCTAGACTCCTTTTCGATGCTTGTATGCTACTCCCAAGAATGCTAACAGGAGTTCCATGTATGCATCGAGCAGAGACTATAACCATTTA

>Columba-mir-1559-5p  
TTTCGATGCTTGTATGCTACTCC

>Columba-mir-1559-3p  
TTCCATGTATGCATCGAGCAG

>Columba-mir-1641\_pre  
ATGCAGGGCATTTCCTGAGGATTAATGACTGTCTGGGGTCATCATCTCCTCCCAGTTAGTTATTAATCCCCAGGAAATACTCTGTGCCTTGATCAT

>Columba-mir-1641-5p  
TGAGGATTAATGACTGTCTGGGG

>Columba-mir-1655\_pre  
GGGGAAACCGCATTTC AACACTGTGT CAGCTGGTCCTGGGTAAACTCCGTTGTTCCGGCAGTATTTACCCACGGCAAGCTGATAGGGCGCTGG

>Columba-mir-1655-3p (predicted)  
ATTTACCCACGGCAAGCTGATA

>Columba-mir-1662\_pre  
ATAGCTGTGCTCTATGGGTTTGACATCATCATACTTGGGATGTATGACACAAAGTCCCAAGCAGGCTGATGTCAGGCCCAAGATGGCTGCCA

>Columba-mir-1662-5p  
TTGACATCATCATACTTGGGAT

>Columba-mir-1662-3p  
CCCAAGCAGGCTGATGTCAGGC

>Columba-mir-1677\_pre  
CTGTGTTGCTTAGGGTCTGATCCTGCACCGCTGAAGTCAATGGAAGTTTTGTCAATTGACTTCAATAGGAGCAGGATTTGAACCTTATGCTCTAT

>Columba-mir-1677-3p  
TTGACTTCAATAGGAGCAGGATTT

>Columba-mir-1677-5p  
TCCTGCACCGCTGAAGTCAATG

>Columba-mir-1720\_pre  
CTGCACTTCTGACCACCTCAGCCGTTGCTTTTGTGAGCCTCGAGAGCGAAGCAACGAGAGGCTGGTCTGAAACCCCTC

>Columba-mir-1720-3p  
GAAGCAACGAGAGGCTGGTCTGA

>Columba-mir-1720-5p  
TGACCACCTCAGCCGTTGCTTTTG

>Columba-mir-1729\_pre  
TAGACAGGCCTGATCCTGCATCCCTTACTCACGTGAGCAGTCGTCTCTATTTACCGGACTACTCGGTGAGTAAGGATCGCAGGACTGGGACCACT

---

>Columba-mir-1729-3p  
CTACTCGGTGAGTAAGGATCGC  
>Columba-mir-1729-5p  
TTCCCTTACTCACGTGAGCAGTC

>Columba-mir-1781\_pre  
GGCAAGACAAGGAGCTTGTTTAACAGCTGAGTGATTTAAAGCAATCAAATTCCTTTAGCTTTAAATCATCCAGCTGTTGAACAGGCTCTTGCTTCA  
>Columba-mir-1781-3p  
TTTAAATCATCCAGCTGTTGA

>Columba-mir-1782\_pre  
TAGACTGCCTGGATTCTAGCCCTTCTCCAAATGAATTTTTAATATAAAAATAATTAACATTCATTGGAGCAGGGACAGGAACCCAGGTCTCTG  
>Columba-mir-1782-3p  
ACATTCATTGGAGCAGGGACA

>Columba-mir-1784\_pre  
ATTTCTTGGGGCCCAATTCTGCTCTTATTGAAATCAGTGAGAGTTCTGCCATTGACTTAAATGGGAGCAGAATTGGGACCTAAGAAGAC  
>Columba-mir-1784-5p  
TTCTGCTCTTATTGAAATCAGT

>Columba-mir-1788\_pre  
CTGTCTCCGGGGCTTGTTTTCCGTTGCCTGCGGTTTTGTTCCAGTGACTCAGGCAGCGAAAGCAAGTCTGGGAGGCTG  
>Columba-mir-1788-3p  
CAGGCAGCGAAAGCAAGTCTG  
>Columba-mir-1788-5p  
GGCTTGTTTTCCGTTGCCTGCG

>Columba-mir-1791\_pre  
TCAGCTGATGCACCGTGTGGGCTGCATCAGTCATGCCATGTTATGAAACCTAACACGATGTGACTGATGCAGGCTGACGTGATGTGTACAGAG  
>Columba-mir-1791-3p  
CGATGTGACTGATGCAGGCTGAT

>Columba-mir-1803-1\_pre  
GAAGAGCTTGGGGCATGAACCAGAGCCCATTTGTAGTCAATGGGAGTCTTTTTCCATTGACTTCAGTGGGGTTTTGAATCAGGCCTTTACTTC  
>Columba-mir-1803-1-3p  
ATTGACTTCAGTGGGGTTTTGA  
>Columba-mir-1803-1-5p  
AGAGCCCATTGTAGTCAATGG

>Columba-mir-1803-2\_pre  
ATGCTTTTAGCATCTGAGCCAAAGCCCACTGCCTTTACTGAAAGCCTTTCCATTGACTTCAGTGGGGTTTTGATCAGCGCTTTGCTGTTAGG  
>Columba-mir-1803-2-3p  
ATTGACTTCAGTGGGGTTTTGA

>Columba-mir-1805\_pre  
GTGGAATATTCTGGGAGTTGTAGTCTTTCAAACAGAGCTTCGCAAGGACATACCTGTATTGGAACACTACAGCTCCCTGAACTTCCTC  
>Columba-mir-1805-3p  
TGTATTGGAACACTACAGCTCCC  
>Columba-mir-1805-5p  
GAGTTGTAGTCTTTCAAACAGA

>Columba-mir-2131\_pre  
TGCTCTTGTGGCTTCCATGCAGAAGTGCACGGAAACAGCTATTTGCTATTGAAAAGTTGGCTGTTACTGTTCTTCTGATGGATGCTGCTGGATT  
>Columba-mir-2131-3p  
CTGTTACTGTTCTTCTGATGG  
>Columba-mir-2131-5p  
ATGCAGAAGTGCACGGAAACAGCT

---

>Columba-mir-2188\_pre  
CAGACCTGTGGGAAAGGTCCAACCTCACATGTCCTGTATAGAATAAAGAGGGATATATGTGGTCAGACCTATCCCACAGGCC  
>Columba-mir-2188-5p  
AAGGTCCAACCTCACATGTCC  
>Columba-mir-2188-3p  
ATATATGTGGTCAGACCTATC

>Columba-mir-2954\_pre  
TGTCTGGGCTTGGAGCAGTGCTGAGAGGGCTTGGGGAGAGGATTGTAGTGGAGCTCCATCCCCATTCCACTCCTAGCAGCTCTCTGGCCACCCAC  
>Columba-mir-2954-3p  
CATCCCCATTCCACTCCTAGCAGC  
>Columba-mir-2954-5p  
TGCTGAGAGGGCTTGGGGAGAGGA

>Columba-mir-2970\_pre  
ACAGCTCCTGCCCTGCGGACAGTCAGCAGTTGGTCTGGTGTGAGCAGCGATTCTCAGATCACCTCTTGGCTGTGGGTGGTGCAGGGAGCACCCC  
>Columba-mir-2970-5p  
GACAGTCAGCAGTTGGTCTGGT  
>Columba-mir-2970-3p  
CAGATCACCTCTTGGCTGTGGG

>Columba-mir-2984\_pre  
TGCTTCACCTGCGGAGCCTGCTGGGAGCGAAATTGAGAAAGGACAGCGCCAGCCCAGGCAATTTCACTCACAGCGGGCACTTGCAGGTGAAGCA  
>Columba-mir-2984-5p (predicted)  
AGCCTGCTGGGAGCGAAATTGA

>Columba-mir-3064\_pre  
TTTATCTTCGATTTGGCTGTTGTGGTGTGCAAAACTTTGTACCTTGCTTTTTTGCCACACTGCAACACTTTACAGATGTGGAAGATGTG  
>Columba-mir-3064-3p  
TTGCCACACTGCAACACTTTAC

>Columba-mir-3618\_pre  
GAATGCATTGTGATTTCCAATAATTGAGACAGTGATTCTGAAAGCTGTCTACATTAATGAAAAGAACAATGTAGTCA  
>Columba-mir-3618-5p  
TGATTTCCAATAATTGAGACAG  
>Columba-mir-3618-3p  
CTACATTAATGAAAAGAACAAT

>Columba-novel-1\_pre  
AGTTGGTGACCATTTTTCTCCCATGGCTGTATAACCCTTTCGATATCCTTGGATTGCACAGCTTTGGTAGGAAGCTGGCCACCATCT  
>Columba-novel-1-5p  
TCTCCCATGGCTGTATAACCC  
>Columba-novel-1-3p  
TTGCACAGCTTTGGTAGGAAG

>Columba-novel-2\_pre  
AGTGGGGGCTGCGGCCTGGGGCAGCGCAAACCCCACTTTAGGGTGGAAAACACAAGGTTGAGCTGATCCAGGCCTGGCCTCCCCTC  
>Columba-novel-2-3p  
TTGAGCTGATCCAGGCCTGGC  
>Columba-novel-2-5p  
TGCGGCCTGGGGCAGCGCAAACC

>Columba-novel-3\_pre  
TGCCTGTTGTCTTATGATCATAAGGATAAATGAGCCCCATCGAGTAATTAATTTATCCGTATGATCATAAGACAGCAGACC  
>Columba-novel-3-3p  
ATTTATCCGTATGATCATAAGA

---

>Columba-novel-3-5p  
TTATGATCATAAGGATAAATGA

>Columba-novel-4\_pre  
TCAAGCTGTGGGGTCTGGCAGAGGGGCCACTCTTGGCCGGGGGACAAAGCCATCAAAGATGGACCCTCTGCTGGCACCCACAGCTGCA  
>Columba-novel-4-3p  
CATCAAAGATGGACCCTCTGCTGG  
>Columba-novel-4-5p  
TGGCAGAGGGGCCACTCTTGGC

>Columba-novel-5\_pre  
TGTGAGCCTGATCCAATATTCCCTTAAGTAGGCAAAGTTGATTCTTTTCACAGTTTTGCCTGCTCAAGGGGTAGAGGAATAG  
>Columba-novel-5-3p  
TTTTGCCTGCTCAAGGGGTAGA  
>Columba-novel-5-5p  
TATTCCCTTAAGTAGGCAAAGTT

>Columba-novel-6\_pre  
TGCACAATTTCCCCTTTAGGAGAAAAATCTCAGTTATTGCACTTTGTGTAAATTCATAACTAAGATATTTCTCCTGAAGGGGAAATGGTGCA  
>Columba-novel-6-3p  
ACTAAGATATTTCTCCTGAAGG  
>Columba-novel-6-5p  
TTTAGGAGAAAAATCTCAGTT

>Columba-novel-7\_pre  
ACCTCCCATCAGGATACATCCCGTTGGGATGCATTCTGTGAGAATGCACCTCATCAGGATACATCCCATCGGGATGCACCCCATGGGGCAG  
>Columba-novel-7-5p  
TCCCGTTGGGATGCATTCTGTG  
>Columba-novel-7-3p  
CAGGATACATCCCATCGGGATG

>Columba-novel-8\_pre  
GGAGGGCCAGATCCTCAGCTGATGTAAATTAGGAGAGCTCTGTCAATGTTAAACGCTTTCTTGATTTACTCCAGCTGAAGATTTGACCTGGG  
>Columba-novel-8-3p  
TTTCCTGATTTACTCCAGCTGA  
>Columba-novel-8-5p  
AGCTGATGTAAATTAGGAGAGC

>Columba-novel-9\_pre  
GTACCACATCCTCAGCTGGTGTAAGTCGGCTTTTACTCCATTAATACTGACTTACATTGCCTGAGGACCTGGATT  
>Columba-novel-9-5p  
TCCTCAGCTGGTGTAAGTCGGC  
>Columba-novel-9-3p  
TGACTTACATTGCCTGAGGACC

>Columba-novel-10\_pre  
CGTGGGGAAGATGCCGTGGGGTTTTCCCTGCCTGGGACCCGAGGTGTGAAGGGCCCGTCGGGGCTGACCCCATGGCAGCTGGCTCCTTC  
>Columba-novel-10-3p  
CCCGTCGGGGCTGACCCCATG  
>Columba-novel-10-5p  
TGGGGGTTTTCCCTGCCTGGGAC

>Columba-novel-11\_pre  
TACCTAGGCCTTTTCTAGTGTGGGATTTAAAGTTGTGTGTAACCTCGTGACAGCATAACCTTTAAATCCTGGTCTGGACAAGGT  
>Columba-novel-11-3p  
ATACCTTTAAATCCTGGTCTGG  
>Columba-novel-11-5p

AGTGTGGGATTTAAAGTTGTGT

>Columba-novel-12\_pre

GATGGGCTCAGTTGTGTCTGCCTTGGCTCTGCTGTGAGGAACTGTCTGGAGCCGGCCATGTCAGGCACAGTGCAGCCCCCTT

>Columba-novel-12-5p

GTTGTGTCTGCCTTGGCTCTG

>Columba-novel-12-3p

CGGCCATGTCAGGCACAGTGT

>Columba-novel-14\_pre

GAGAGCATCGGAGCTGTTCGGAGCCGATGTTCTAGCTGGAATGAAAAACGGCTGACGCTGGCACCGAGAGCCCTGTGGCTTCC

>Columba-novel-14-5p

CTGTTCGGAGCCGATGTTCTAGCT

>Columba-novel-14-3p

CTGACGCTGGCACCGAGAGCC

>Columba-novel-15\_pre

AAGAACAGATCAGGGCTTGGAGAAATAACACGCTAAAGAGTTTCAGCTGGTGTGGTCTCTCTCTGCCAGTTTGCCCGTCCAGT

>Columba-novel-15-5p

AGGGCTTGGAGAAATAACACGCT

>Columba-novel-15-3p

TGTGGTCTCTCTCTGCCAGT

>Columba-novel-16\_pre

GAAGGTTTTGTAGCTCAGGAGCAGTGCCAAGGCTGGGCTGGCTCTGCGCCTCAGCGTGGGCACTGCTCCAGACCTAATAAACCCCTG

>Columba-novel-16-3p

CAGCGTGGGCACTGCTCCAGAC

>Columba-novel-16-5p

CAGGAGCAGTGCCAAGGCTGGG

>Columba-novel-17\_pre

GCGATGCAACAGGACAGCAGAGGAAATCCAGACGAGCTCCCTTTTACCACAGTGGGACTTGTCTCTACACCTCTGCAACATTTATCGC

>Columba-novel-17-3p

CTTGTCTCTACACCTCTGCAAC

>Columba-novel-17-5p

CAGCAGAGGAAATCCAGACGAGCT

>Columba-novel-18\_pre

TGTTTCCTTCACTCATGGCTGCACAGTCTGGCAGGGCTTGCAGAGGCCACAGAGAACTACCTGGAGGCTTTGCCAGCCTGGGCCGCTGCGGTGGTG

>Columba-novel-18-5p

CACAGTCTGGCAGGGCTTGCAG

>Columba-novel-18-3p

GGAGGCTTTGCCAGCCTGGGC

>Columba-novel-19\_pre

TCTACCATGGTTCACGGCCACTCGCACGAGGAGCCGACACCACGGCCACTCGCACGAGGGGCTCTACCATGGTTCAC

>Columba-novel-19-3p

CACTCGCACGAGGGGCTCTACC

>Columba-novel-19-5p

CACGGCCACTCGCACGAGGAGC

>Columba-novel-20\_pre

CCACCCACACCAAGAGCCCCAGTGTTCGCCGGCCACCCAGCTCGGCCCGCCCGGCGACACTCGGGGCTCTTGGCGTGGGCCA

>Columba-novel-20-3p

CCCGGCGACACTCGGGGCTCT

>Columba-novel-20-5p

AGCCCCAGTGTTCGCCGGCC

---

>Columba-novel-21\_pre  
GTTCAAAGGCACAGATGATAGCCAGGTGCCTCATCTCATGCCTGTGGAAAAACCTGTGTGAGAGGAGTGTCTGACTGTTTTCTGTGCCTTTGCGA  
>Columba-novel-21-3p  
TGTGAGAGGAGTGTCTGACTGTT  
>Columba-novel-21-5p  
TAGCCAGGTGCCTCATCTCATGCC

>Columba-novel-22\_pre  
CTACTTCTGGTCAGGCCAGAAATTTTGCAAGAGCAGCCTCTCTCATGATATTTTGGCACTTTTGTCTTCTGGTCTTGCCTGAAGCCT  
>Columba-novel-22-3p  
CACTTTTGTCTTCTGGTCTTGC  
>Columba-novel-22-5p  
CAGGCCAGAAATTTTGCAAGAGC

>Columba-novel-23\_pre  
GGGCTCCACATGCAGAGGATGGAGCTGAATGGGATTTTGTCTGCCTGAAATGGTCCCATCCAGCCCCAGTCTGTGCTGCACGGGGAGGCA  
>Columba-novel-23-5p  
AGAGGATGGAGCTGAATGGGA  
>Columba-novel-23-3p  
CCATCCAGCCCCAGTCTGTGC

>Columba-novel-24\_pre  
GAGGAGGGGCAGGGTCAAGGGTCAAAGGTCAAGGGTGGCCAAGACCTTGACCTTGACCTTTGACCCCAGCCGGCCAAG  
>Columba-novel-24-3p  
TGACCTTGACCTTTGACCCCAGC  
>Columba-novel-24-5p  
CAGGGTCAAGGGTCAAAGGTCAAG

>Columba-novel-25\_pre  
GTCTAAAAATCTTGTTCCTATGTTAAGGGAGCCTGTTTGTAAATAGGGCAGGTCCCCTGCATAAAGGACAGTGTTTTTATTACACA  
>Columba-novel-25-3p  
TCCCCTGCATAAAGGACAGTGT  
>Columba-novel-25-5p  
CTTGTTCCTATGTTAAGGGAGCC

>Columba-novel-26\_pre  
CTGAGCAACCTGAAGCATATTTATACAGATTAAGTGGTTTCTAATACTCCAAAGAGCACTTAATCTGCATGAATGTGCTTCATGTTGCTATGT  
>Columba-novel-26-5p  
TATTTATACAGATTAAGTGGTTTC  
>Columba-novel-26-3p  
AGCACTTAATCTGCATGAATGTG

>Columba-novel-27\_pre  
CGCTCCCCGCAAACCAGTGGGTACCTTGTAGAAGGGACTGGTGGAGAGTGGACAAGTACCCGCTGGTTTGCTTGGGGAGGT  
>Columba-novel-27-5p  
CGCAAACCAGTGGGTACCTTGTA  
>Columba-novel-27-3p  
CAAGTACCCGCTGGTTTGCTTG

>Columba-novel-28\_pre  
ATTGTCTTGGCCTGTCTCAGGACCAGGTGCCTTCTCCTGTTCCCTGCTGAAGTCTTCCCTTGTCCTGACAGGGAGCCAAGATCAT  
>Columba-novel-28-3p  
TGAAGTCTTCCCTTGTCCTGACAG  
>Columba-novel-28-5p  
CTCAGGACCAGGTGCCTTCTCC



---

>Columba-novel-29\_pre  
AAATTGAGTCATCAGCAGCAAGGACCACCTTAGTCCTGCTCTCCTCTCTCTCACGCCACAGGTCTAAGTGGTCCCTCGCTGCCGATGACTCAATACA  
>Columba-novel-29-3p  
AGGTCTAAGTGGTCCCTCGCTGC  
>Columba-novel-29-5p  
AGCAAGGACCACCTTAGTCCTGC

>Columba-novel-30\_pre  
TCTCCGGGGCGGTGGAAGGAGCCGGTAGCTGTGCAGCCCCGTGTCCGACAGCGCTGCTGAGCTCACGGCACCGACCACCGTGCGCGGCCCT  
>Columba-novel-30-5p  
AGGAGCCGGTAGCTGTGCAGCC  
>Columba-novel-30-3p  
CTGCTGAGCTCACGGCACCGAC

>Columba-novel-31\_pre  
CACGGGCGGCAGAGCCTCGCGCTGACTCTGAAGGTTCTGGTAACTCGACTTCAGATGGCAGAGCTGAGGCTGCGCCGCTCGCT  
>Columba-novel-31-3p  
TCAGATGGCAGAGCTGAGGCTGC  
>Columba-novel-31-5p  
GAGCCTCGCGCTGACTCTGAAG

>Columba-novel-32\_pre  
GTCCGGCTGCTCGGGAACCGCTGGCACGTTGGAGCCCTCGCCTTTGTGCCTCTCGGCGAGCGTGATGTGCCACGGCTCTCGTCCGGCCTGTC  
>Columba-novel-32-3p  
CGAGCGTGATGTGCCACGGCTC  
>Columba-novel-32-5p  
CCGCTGGCACGTTGGAGCCCTCGCC

>Columba-novel-33\_pre  
CGACCAGAGGTGAGAGCTCAGGTGCCTTCTCCAAATCCTTCTGAGCACGGGACGGCGCCCTGACCTCTGTCCCCTCTCGGCAG  
>Columba-novel-33-3p  
GACGGCGCCCTGACCTCTGTCC  
>Columba-novel-33-5p  
GTGAGAGCTCAGGTGCCTTCTC

>Columba-novel-34\_pre  
CTGTGGTACCGACCCTGCGCGGCCGGTACTGATCCTGCAGTACCAACCCTGTGCGGCCGGTACTGACCCTGCATGGCTGGTACCAATC  
>Columba-novel-34-3p  
TGCGGCCGGTACTGACCCTGCA  
>Columba-novel-34-5p  
CGCGGCCGGTACTGATCCTGCA

>Columba-novel-35\_pre  
TTGCCAGAGGTGGTGTGGGGTTTGGATCTCAGTTAAAATCTCACTGGAGACCATACTGCACAGCCTTCTCTAGGTGA  
>Columba-novel-35-3p  
GGAGACCATACTGCACAGCCTTC  
>Columba-novel-35-5p  
TGGTGTGGGGTTTGGATCTCAG

>Columba-novel-36\_pre  
CCTGTGCAGCACTTGCCACCACAGTGGGCTGCTGCAGGACACATAGCCGGAGCACACGGTGGTGGTACCAGTGCTGGATCTG  
>Columba-novel-36-5p  
TGCCACCACAGTGGGCTGCTGC  
>Columba-novel-36-3p  
CGGAGCACACGGTGGTGGTACC

>Columba-novel-37\_pre

---

TTAGAGTGGTATTTAGACCGATTGTTGGTAGTGTCTTTATAAAAAACGATAAAGAACACTACCAACGACCGGTCTAAATGCCACTTATC

>Columba-novel-37-3p

AAGAACACTACCAACGACCGGT

>Columba-novel-37-5p

CGATTGTTGGTAGTGTCTTTA

>Columba-novel-38\_pre

AGGTGAGGGCTGGTTCCCGCGCTGGTGTGTGGCTCCGTGGCCCCGAGCTGCCCGGGAGCCGCTCACCAGCGCTGGTGTCTCTGTCCCCAGGT

>Columba-novel-38-3p

AGCCGCTCACCAGCGCTGGTGT

>Columba-novel-38-5p

TCCCGCGCTGGTGTGTGGCTCC

>Columba-novel-39\_pre

AGAGGCCATCTCATGCCATTAATTTCTAAGCAGTCAATGAGGAATTCTGCTGTAGAATTAATGGCAAAATATGGCCCAC

>Columba-novel-39-3p

CTGTAGAATTAATGGCAAAAT

>Columba-novel-39-5p

CATGCCATTAATTTCTAAGCA

>Columba-novel-40\_pre

GAAGGTAAAGAAGTTACACTGGGTCTCCCACATCTCTGGTGAGATTTTATAGCTACAGAGATGCTGGGTGAAACAGTGTATCTTCATATCAGT

>Columba-novel-40-5p

CACTGGGTCTCCCACATCTCTG

>Columba-novel-40-3p

GAGATGCTGGGTGAAACAGTGT

---

>Python-let-7a-1\_pre  
CTGCTCTGTGGGATGAGGTAGTAGGTTGTATAGTTTTAGGGTCATACCCACCCTGGGAGATAACTATACAGTCTACTGTCTTTTCCCTAAGGAGGCA  
>Python-let-7a-1-5p  
TGAGGTAGTAGGTTGTATAGTT  
>Python-let-7a-1-3p  
CTATACAGTCTACTGTCTTTTC

>Python-let-7a-2\_pre  
TGTCTTTGGGGTGAGGTAGTAGGTTGTATAGTTTTAGGGTTAGACCCTGCCTGTCAGATAACTATACAATCTACTGTCTTTTCCCTGAAGTGGCTGT  
>Python-let-7a-2-5p  
TGAGGTAGTAGGTTGTATAGTT  
>Python-let-7a-2-3p  
CTATACAATCTACTGTCTTTTCC

>Python-let-7a-3\_pre  
AGGTGAGGTAGTAGGTTGTATAGTTTTGTGGGAGGGATTATATCCCATTTTCAGGTGATAACTATACAGTCTATTGCCTTCCCTTA  
>Python-let-7a-3-5p  
TGAGGTAGTAGGTTGTATAGTT

>Python-let-7b\_pre  
GGTGAGGTAGTAGGTTGTGTGGTTTTAGGGTAGTAATTTTGCCTCAATCAGGAGATAACTATACAACCTACTGCCTTCCCTTGA  
>Python-let-7b-5p  
TGAGGTAGTAGGTTGTGTGGTT  
>Python-let-7b-3p  
CTATACAACCTACTGCCTTCCCT

>Python-let-7c-1\_pre  
GTGTGCATCCGGGTTGAGGTAGTAGGTTGTATGGTTTTAGAAATTACACCCAGGAGTTAACTGTACAACCTTCTAGCTTTTCCCTGGAGCACACTTGA  
>Python-let-7c-1-5p  
TGAGGTAGTAGGTTGTATGGTT  
>Python-let-7c-1-3p  
CTGTACAACCTTCTAGCTTTTCC

>Python-let-7c-2\_pre  
GCGTGCCTCGTGTGAGGTAGTAGGTTGTATGGTTGAGAATAACACCATCAGGAGATAACTATACAGCCTCCTAGCTTTTCCCTGAGGCATCGCCA  
>Python-let-7c-2-5p  
TGAGGTAGTAGGTTGTATGGTT  
>Python-let-7c-2-3p  
CTATACAGCCTCCTAGCTTTTCC

>Python-let-7c-3\_pre  
CAAGCTGAGGTAGTAGGTTGTATGGTTTTAGAAATTACACCAAGGGAGATAACTGTACAGCCTCCTAGCTTTTACTT  
>Python-let-7c-3-5p  
TGAGGTAGTAGGTTGTATGGTT

>Python-let-7d\_pre  
GGGTTCCCTAGGAAGAGGTAGTAGGTTGCATAGTTTTAGGGCAGTGGTTTTGCCTATAAGGAGTTAACTATACAACCTGCTGCCTTTCTTAGGGCT  
>Python-let-7d-5p  
AGAGGTAGTAGGTTGCATAGTT  
>Python-let-7d-3p  
CTATACAACCTGCTGCCTTTTCT

>Python-let-7e\_pre  
ATGCTGTCTTTGAGGCTGAGGTAGTAGATTGAATAGTTGTGGAGCCATCTTCTCCCTTTGAGCTAACTATACAATCTACTGTCTTTTCCCTA  
>Python-let-7e-5p  
TGAGGTAGTAGATTGAATAGTT  
>Python-let-7e-3p

CTATACAATCTACTGTCTTTCC

>Python-let-7f-1\_pre

CCTGGGATGAGGTAGTAGATTGTATAGTTTTAGGGTCATACCCGGTCTTGGAGATAACTATAACAATCTACTGTCTTTCCCTA

>Python-let-7f-1-5p

TGAGGTAGTAGATTGTATAGTT

>Python-let-7f-1-3p

CTATACAATCTACTGTCTTTCT

>Python-let-7f-2\_pre

TTATCAGGTTGAGGTAGTAGATTGTATAGTTGTAGGGCAGTTATTTTTGCCTCTTCAGGAGATAACTATAACAATCTATTGCCTTCCCTGAGGA

>Python-let-7f-2-5p

TGAGGTAGTAGATTGTATAGTT

>Python-let-7f-2-3p

CTATACAATCTATTGCCTTCCCT

>Python-let-7g\_pre

GTTCCAGGCTGAGGTAGTAGTTTTGTACAGTTTTGAGGGTCTACGATACCCGGTACAGGAGATAACTGTACAGGCCACTGCCTTGCCTGGGGC

>Python-let-7g-5p

TGAGGTAGTAGTTTTGTACAGTT

>Python-let-7g-3p

CTGTACAGGCCACTGCCTTGC

>Python-let-7i\_pre

ACCCTGGCTGAGGTAGTAGTTTTGTGCTGTTTCGTCGGGTTGTGACATTGCCCGCTGTGGAGATAACTGCGCAAGCTACTGCCTTGCTAGTGC

>Python-let-7i-5p

TGAGGTAGTAGTTTTGTGCTGTT

>Python-let-7i-3p

CTGCGCAAGCTACTGCCTTGCT

>Python-mir-1a-1\_pre

ACCTGCTTGAGTGACATACTTCTTTATATGCCCATATGAACCTGGCAAACCTATGGAATGTAAAGAAGTATGTATTTTCAGGCATGGA

>Python-mir-1a-1-3p

TGGAATGTAAAGAAGTATGTA

>Python-mir-1a-1-5p

CATACTTCTTTATATGCCCATA

>Python-mir-1a-2\_pre

ACCTGCCCAGAGCACATACTTCTTTATGTACCCATATGAAGATATAATGTTATGGAATGTAAAGAAGTATGTACTTTTGGCAGG

>Python-mir-1a-2-3p

TGGAATGTAAAGAAGTATGTA

>Python-mir-1a-2-5p

ACATACTTCTTTATGTACCCAT

>Python-mir-1b\_pre

TCCCGAGCCTACATACTTCTTTCATATGCCCATATGGAGTCGGCCGGCTATGGAATGTTAAGAAGTATGTATCTTTGGGATCGAC

>Python-mir-1b-3p

TGGAATGTTAAGAAGTATGTAT

>Python-mir-1b-5p

TACATACTTCTTTCATATGCCCAT

>Python-mir-7-1\_pre

TTGGTCTAGTTCTGTGTGGAAGACTAGTGATTTTTGTTGTTTTTAGATTACTAAAGTGACAACAAATCGCAGTCTACCATATGGCACAGTCCA

>Python-mir-7-1-5p

TGGAAGACTAGTGATTTTTGTTGTT

>Python-mir-7-1-3p

CAACAAATCGCAGTCTACCATA

---

>Python-mir-7-2\_pre  
TGCCGGACTCCTTATGGAAGACTAGTGATTTTGTGTTTCTGTAGCTCATCTCATGACAACAAGTCACAGTCTGCCTTCTGGAGTCTGGC

>Python-mir-7-2-5p  
TGGAAGACTAGTGATTTTGTGTT

>Python-mir-7-2-3p  
CAACAAGTCACAGTCTGCCTT

>Python-mir-7-3\_pre  
GGCCTGCTTCTGATTGGAAGACTAGTGATTTTGTGTTTCTGGTTTGTAGAAAGCTGACAACAAATCACAGCCTACCATCCAGCAGGGGCCA

>Python-mir-7-3-5p  
TGGAAGACTAGTGATTTTGTGTT

>Python-mir-7-3-3p  
CAACAAATCACAGCCTACCATC

>Python-mir-9-1\_pre  
GGGTTGGTTGTTATCTTTGGTTATCTAGCTGTATGAGTGGGGTCAAGTCTTCATAAAGCTAGATAACCGAAAGTAAAAA

>Python-mir-9-1-5p  
TCTTTGGTTATCTAGCTGTATG

>Python-mir-9-1-3p  
TAAAGCTAGATAACCGAAAGTA

>Python-mir-9-2\_pre  
AGGAAGCGAGTTGTTATCTTTGGTTATCTAGCTGTATGAGTGTGTTGGCCTTCATAAAGCTAGATAACCGAAAGTAAAAACTCCTTCA

>Python-mir-9-2-5p  
TCTTTGGTTATCTAGCTGTATG

>Python-mir-9-2-3p  
TAAAGCTAGATAACCGAAAGTA

>Python-mir-9-3\_pre  
AGGGCCGTTTCTGTCTTTGGTTATCTAGCTGTATGAGTGTATCAAGCCATCATAAAGCTAGATAACCGAAAGTAGAAATGACT

>Python-mir-9-3-5p  
TCTTTGGTTATCTAGCTGTATG

>Python-mir-9-3-3p  
TAAAGCTAGATAACCGAAAGTA

>Python-mir-9-4\_pre  
ACAGGGTCGGTTTCTCTCTTTGGTTATCTAGCTGTATGAGTGTATCTGATGTCATAAAGCTAGAGAACCGAATGTACAAACCGCCCCGC

>Python-mir-9-4-5p  
TCTTTGGTTATCTAGCTGTATGA

>Python-mir-9-4-3p  
TAAAGCTAGAGAACCGAATGTA

>Python-mir-10a\_pre  
GTCTTCTGTATGTACCCTGTAGATCCGAATTTGTGTAAAAGAAGCTGCCTCACAAATTCGCATCTAGGGGAATATGTAGTTGAC

>Python-mir-10a-5p  
TACCCTGTAGATCCGAATTTGTG

>Python-mir-10a-3p  
CAAATTCGCATCTAGGGGAAT

>Python-mir-10b-1\_pre  
ACGTTGTCTATATATACCCTGTAGAACCGAATTTGTGTGGTATTTACGTAGTCACAGATTCGATTCCTAGGGGAATATATGGTCGATGC

>Python-mir-10b-1-5p  
TACCCTGTAGAACCGAATTTGTG

>Python-mir-10b-1-3p  
AGATTCGATTCCTAGGGGAATA

---

```
>Python-mir-10b-2_pre
CATCGTTTATATATACCTGTAGAACCGAATTTGTGTGAGCACCTCTATTGCAAATTCGTCTCTAGGGGGATATGTGGATGATG
>Python-mir-10b-2-5p
TACCCTGTAGAACCGAATTTGT
>Python-mir-10b-2-3p
AAATTCGTCTCTAGGGGGATA

>Python-mir-15a_pre
CCTCAAAGTACTATAGCAGCACATCATGATTTGTGTTTCATAATAAATATGCAAGTCATTATTTGCTGCTTTAGAATTTTAAGG
>Python-mir-15a-5p
TAGCAGCACATCATGATTTGTG
>Python-mir-15a-3p
CAAGTCATTATTTGCTGCTTTA

>Python-mir-15b_pre
CCTTGAGGTGGCGTAGCAGCACGACATGGTTTGTAGAGAAAAGAAGATACAGACCGTTCTGGGCTGCCTCATGACCTCAAGG
>Python-mir-15b-5p
TAGCAGCACGACATGGTTTGTGTA
>Python-mir-15b-3p
CAGACCGTTCTGGGCTGCCTCA

>Python-mir-16a_pre
GCCAGTTGTGCCTTAGCAGCACATAAATATTGGAGTTATTATTAGTAAAGTATCTCCAGTATCAATTGTGCTGCTGAAGTAAGGCTGTT
>Python-mir-16a-5p
TAGCAGCACATAAATATTGGAG (predicted)

>Python-mir-16b_pre
TACTTGTTCGCCCTAGCAGCACGTAAATATTGGTGTAGTAAAGATAATCTTAACGCCAATATTATTGTGCTGCTTAAGCGTGACAGGGATT
>Python-mir-16b-5p
TAGCAGCACGTAAATATTGGTG
>Python-mir-16b-3p
CCAATATTATTGTGCTGCTTAA

>Python-mir-16c_pre
TGTCTGCTCTGCTTTAGCAGCACGTAAATACTGGAGTTTATAGATGCTCTGCCCTCCAGTATTGCTTTGCTGCTTTAGTCAAGCTGGCACATGC
>Python-mir-16c-5p
TAGCAGCACGTAAATACTGGAG
>Python-mir-16c-3p
CCAGTATTGCTTTGCTGCTTTA

>Python-mir-17_pre
TGTTAGAATAATGTCAAAGTGCTTACAGTGCAGGTAGTGATTTATAGAACCTACTGCAGTGAAGGCACTTGTAGCATTATGCTGGCA
>Python-mir-17-5p
CAAAGTGCTTACAGTGCAGGTA
>Python-mir-17-3p
ACTGCAGTGAAGGCACTTGTAGC

>Python-mir-18a_pre
ATAACTGCTTTTTTGTCTAAGGTGCATCTAGTGCAGATAGTGAAGTAGATTAGCATCTACTGCCCTAAGTGCTCCTTCTGGCATAAGAAGTTGT
>Python-mir-18a-5p
TAAGGTGCATCTAGTGCAGATAG
>Python-mir-18a-3p
ACTGCCCTAAGTGCTCCTTCTG

>Python-mir-18b_pre
AGTTTCTTTGTGCTAAGGTGCATCTAGTGCAGTTAGTGAAGTAGCTTAGACTCTACTGCCCTGAGTGCTCCTTCTGGCA
>Python-mir-18b-5p
```

TAAGGTGCATCTAGTGCAGTT

>Python-mir-19a\_pre  
GCAGTCCTCTGTTAGTTTTGCATAGTTGCACTACAGGAAGAGTGTAGTTGTGCAAATCTATGCAAAACTGATTGTGGCCTGTTA

>Python-mir-19a-3p  
TGTGCAAATCTATGCAAAACTGA

>Python-mir-19a-5p  
AGTTTTGCATAGTTGCACTA

>Python-mir-19b-1\_pre  
CTGTTCTCTGGTTAGTTTTGCAGGTTTGCATCCAGCTGTATGATACTCTGCTGTGCAAATCCATGCAAAACTGACTGTGGCAGT

>Python-mir-19b-1-3p  
TGTGCAAATCCATGCAAAACTG

>Python-mir-19b-2\_pre  
CCACCACAGTCAGTTTTGCATGGATTTGCACAGCAACAGACGCCAAGCTGAGATGCAAACCAGCAAAACCCACCGTAGGTCA

>Python-mir-20a\_pre  
CCTGTAGCACTAAAGTGCTTATAGTGCAGGTAGTGTTCATAATCTACTGCATTAGGAGCACTTAAAGTACTACTAGCTG

>Python-mir-20a-5p  
AAAAGTGCTTATAGTGCAGGTAG

>Python-mir-20a-3p  
ACTGCAGTGTTAGCACTTCA

>Python-mir-20b\_pre  
GTTTGTCTGGCAGTGCCAAAGTGCTCATAGTGCAGGTAGTTGTGGACCCAAATTTCTACTGTAATGTGGGCACTTCCAGTCCTGCTGGATCCTG

>Python-mir-20b-5p  
CAAAGTGCTCATAGTGCAGGTAG

>Python-mir-20b-3p  
ACTGTAATGTGGGCACTTCCAGT

>Python-mir-21\_pre  
TACCTTTCTGTGCGATAGCTTATCAGACTGATGTTGACTGTTGGATGTCATGGCAACAACAGTCGGTAGGCTGTCTGACATTTTGGTATC

>Python-mir-21-5p  
TAGCTTATCAGACTGATGTTGAC

>Python-mir-21-3p  
CAACAACAGTCGGTAGGCTGTC

>Python-mir-22\_pre  
TGGCTACCCAGCAGCAGTTCTTTCAGTGGCAGCCTTTACGTCCCCTCCAGCAGCTAAAGCTGCCAGTTGAAGAAGTGTGACCGTAGCTGC

>Python-mir-22-3p  
AAGCTGCCAGTTGAAGAAGTGT

>Python-mir-22-5p  
AGTTCTTTCAGTGGCAGCCTTTA

>Python-mir-23a\_pre  
GCTGCCTGCTGGGGTTTCTGGTGATGTGATTTTACCCTGATGTTTACAGAAATCACATTGCCAGGGATTTCCAAC

>Python-mir-23a-3p  
ATCACATTGCCAGGGATTTCC

>Python-mir-23b\_pre  
CTGTTTTGGTTGTTTGGGTTTCTGGCATGCTGATTTGTGATTTAAGATTTAAAATCACATTGCCAGGGATTTACCACATAACCATGACATTA

>Python-mir-23b-3p  
ATCACATTGCCAGGGATTTACCAC

>Python-mir-23b-5p  
GGGTTCTTGGCATGCTGATTT

---

```
>Python-mir-24-1_pre
GATGGACCCGTCCTCCGGTGCCTACTGAGCTGATATCAGTTCTGATTTTACATACTGGCTCAGTTCAGCAGGAACAGGAG
>Python-mir-24-1-3p
TGGCTCAGTTCAGCAGGAACAG
>Python-mir-24-1-5p
TGCCTACTGAGCTGATATCAG

>Python-mir-24-2_pre
GCCTCCCGTGCCTACTGAGCTGATACTCAGTTGCTTTGGAAAACTGGCTCAGTTCAGCAGGAACAGGAG
>Python-mir-24-2-3p
TGGCTCAGTTCAGCAGGAACAG

>Python-mir-26-1_pre
AGGCTGTGGCTAGGTTCAAGTAATCCAGGATAGGCTGTAGGTACAGCAGTCAGCCTGTTCTCGATTACTTGGCCTTGGAGGCAGCCAG
>Python-mir-26-1-5p
TTCAAGTAATCCAGGATAGGCT
>Python-mir-26-1-3p
CCTGTTCTCGATTACTTGGCCT

>Python-mir-26-2_pre
CTGTGACCCGGTTCAAGTAATCCAGGATAGGCTGTGTGCATTCTTAATGGCCTATCCTTGAATACTTGCCTGGGACGTAGCCA
>Python-mir-26-2-5p
TTCAAGTAATCCAGGATAGGCT

>Python-mir-26-3_pre
GCGAAGGTCTCAGCCTGGTTCAAGTAATCCAGGATAGGCTGTTACCAGGCAACACGGCCTATTCTTGGATTACTTGTTCAGGAGGCGGCTTCTTGC
>Python-mir-26-3-5p
TTCAAGTAATCCAGGATAGGCT
>Python-mir-26-3-3p
CCTATTCTTGGATTACTTGTTC

>Python-mir-27a_pre
GACTGCCTAGGGTAGGGCTTAGCTCACTTGTGAACAGCGTTTGGTTTCAGCCGTGTTTCACAGTGGCTAAGTTCCGCCACTTGGAGT
>Python-mir-27a-5p
AGGGCTTAGCTCACTTGTGAACA
>Python-mir-27a-3p
TTCACAGTGGCTAAGTTCCGC

>Python-mir-27b_pre
AGACCTCTCTAGTGAGGTGCAGAGCTTAGCTGATTGGTGAACAGTGATTGATTTCCTCTTTGTTTCACAGTGGCTAAGTTCTGCACCTGAAGAGAAG
>Python-mir-27b-3p
TTCACAGTGGCTAAGTTCTGC
>Python-mir-27b-5p
AGAGCTTAGCTGATTGGTGAACA

>Python-mir-29a-1_pre
CCCCTTTAAAGGATAACTGATTTCTTCTGGTGTTCGGAGTCTATTCTCTTTCTAGCACCATTTGAAATCGGTTATAGTGATTGGGGA
>Python-mir-29a-1-5p
TGATTTCTTCTGGTGTTCGGA
>Python-mir-29a-1-3p
CTAGCACCATTTGAAATCGGT

>Python-mir-29a-2_pre
ACACAGGCTGACCGATTTCTCTTGGTGTTCAGAGTCTTAGTTTTTGTCTAGCACCATTTGAAATCGGTTATGATGTAGGGGGAAAAGC
>Python-mir-29a-2-3p
TAGCACCATTTGAAATCGGTTAT
>Python-mir-29a-2-5p
```



ACCGATTTCTCTTGGTGTTCAG

>Python-mir-29b-1\_pre  
TGTGTCTTCTCTGGAAGCTGGTTTTACATGGTGGCTTAGATTTTTCCATCTCTGTATCTAGCACCATTTGAAATCAGTGTCTTAGGAGCAAGAAT

>Python-mir-29b-1-3p  
CTAGCACCATTTGAAATCAGTG

>Python-mir-29b-1-5p  
CTGGTTTTACATGGTGGCTTAGAT

>Python-mir-29b-2\_pre  
CTTCTTCAGGAATCTGGTTTTCATATGGTGGTTTTAGATTTAAGTACACAATGTCTAGCACCATTTGAAATCAGTGTTTTTGGGGGAAGAAT

>Python-mir-29b-2-3p  
CTAGCACCATTTGAAATCAGTG

>Python-mir-30a\_pre  
CTGTTGACAGTGAGCGATTGTAAACATCCTCGACTGGAAGCTGTGAAGCAGCAGATGGGGCTTTCAGTCGGATGTTTGCAGCTGCCAACTGCCACA

>Python-mir-30a-5p  
TGTA AACATCCTCGACTGGAAGCT

>Python-mir-30a-3p  
CTTTCAGTCGGATGTTTGCAGC

>Python-mir-30b\_pre  
ACTGATTCTTAGTTTTATGTAAACATCCTACACTCAGCTTTATCACATGAAATGGCTGGGAGATGGAAGTTTACTTCAACTGATTTGG

>Python-mir-30b-5p  
TGTA AACATCCTACACTCAGCT

>Python-mir-30c-1\_pre  
TGTA AACATCCTACACTCTCAGCTGTGTGGAAAAGAAGAAAGCTGGGAGAAGGCTGTTTACTCTCTCTGCATTGGAAA

>Python-mir-30c-1-5p  
TGTA AACATCCTACACTCTCAGCT

>Python-mir-30c-1-3p  
CTGGGAGAAGGCTGTTTACTCT

>Python-mir-30c-2\_pre  
TGTA AACATCCTACACTCTCAGCTGTGACTTTGTGGTGGCTGGGAGAAGGTTGTTTACGCCCTCCT

>Python-mir-30c-2-5p  
TGTA AACATCCTACACTCTCAGCT

>Python-mir-30c-2-3p  
CTGGGAGAAGGTTGTTTACGCC

>Python-mir-30d\_pre  
GTAGTCTGTTGTTGTAAACATCCCCGACTGGAAGCTGGAAAATGTAGCTTTCAGTCCGATGTTTGCTGCCGCCGGCTATTCA

>Python-mir-30d-5p  
TGTA AACATCCCCGACTGGAAGCT

>Python-mir-30d-3p  
TTTCAGTCCGATGTTTGCTGCC

>Python-mir-30e\_pre  
TGGGCAGTTGTTGCTCCTGTAAACATCCTTGACTGGAAGCTGTACAGGCTCAAAGAGGCTTTCAGTCGGATGTTTACAGCGGCAGGCTGCCACAA

>Python-mir-30e-5p  
TGTA AACATCCTTGACTGGAAGCT

>Python-mir-30e-3p  
CTTTCAGTCGGATGTTTACAGC

>Python-mir-31\_pre  
ATTGAGAGCTGGAGAGGAGGCAAGATGTTGGCATAGCTGATGAACTGAGAACCCTGCTATGCCAACATATTGCCCTCTTTC

>Python-mir-31-5p

---

AGGCAAGATGTTGGCATAGCT

>Python-mir-32\_pre  
CTCTGGTGGTGATATTGCACATTACTAAGTTGCATGTTGTCACGGCCTCAGTGCAATTTAGTGTGTGTGATATTTTCACATGAGTGCATGC  
>Python-mir-32-5p  
TATTGCACATTACTAAGTTGC

>Python-mir-33-1\_pre  
GGGTGGCAACTGTAGTGCATTGTAGTTGCATTGCATGTTCTGGCAATACTCATGCAATGTTTCTGCAGTGCAGTTCAGAGGCATGCCT  
>Python-mir-33-1-3p  
CAATGTTTCTGCAGTGCAGTT  
>Python-mir-33-1-5p  
GTGCATTGTAGTTGCATTGCA

>Python-mir-33-2\_pre  
CTATGGCTGTGTCGGTGGTGCATTGTAGTTGCATTGCACGTGCAGGTGAAGATGTGCAATGCCCTCCAGTGCAGCCCTGGGGCAGCATCC  
>Python-mir-33-2-5p  
GTGCATTGTAGTTGCATTGCA

>Python-mir-34a\_pre  
CTCTGTGAGTGCTTCTTTGGCAGTGTCTTAGCTGGTTGTTGTGTGCGATGATTGAAGCAGCAATCAGCAAGCATACTGCTGCAGAAGTACTGCACG  
>Python-mir-34a-5p  
TGGCAGTGTCTTAGCTGGTTGT

>Python-mir-34b\_pre  
AATCATGTTTGGTTTGTAGGCAGTGTAGTTAGCTGATTGTGTGTCTCCCCAGCAATCACTAGCTTCACTGTCATCAAAAACAATGTGCAG  
>Python-mir-34b-5p  
AGGCAGTGTAGTTAGCTGATTGT  
>Python-mir-34b-3p  
AATCACTAGCTTCACTGTCA

>Python-mir-34c\_pre  
CATCAGCCTTGTACCAGGCAGTGTAGTTAGCTGATTGACAAAGGCAACAGTTCGCTAACAACACAGCCAAGTGAAAAGGCTGCCT  
>Python-mir-34c-5p  
AGGCAGTGTAGTTAGCTGATTGA  
>Python-mir-34c-3p  
AGTCGCTAACAACACAGCCAAGT

>Python-mir-92a-1\_pre  
TTTCTACACAGGTTGGGATCGGTTGCAATGCTGTGTTGAGTCTGTGGTATTGCACTTGTCCCAGCCTGTGAGGTTGGTGGGGCAAG  
>Python-mir-92a-1-3p  
TATTGCACTTGTCCCAGCCTGT

>Python-mir-92a-2\_pre  
GAGCTCCTTCCCTCCGTGGGTTGGGATTTGTTGTATTACTCGGAGATCTCTGAACAGTATTGCACTTGTCCCAGCCTGTGGAGGACCGGGGAGAAT  
>Python-mir-92a-2-3p  
TATTGCACTTGTCCCAGCCTGT

>Python-mir-92b\_pre  
GTTGGGGCAGGTTGGGGCTGAGTGAATGTTGTGATTTTTCCCACGAATATTGCACTCGTCCTGGCCTCCCCTGTTCT  
>Python-mir-92b-3p  
TATTGCACTCGTCCTGGCCT

>Python-mir-96\_pre  
CCTGCTTGGCCCTTTTTGGCACTAGCACATTTTTGCTGTTCTCTATAAACATTGAGCAATTATGTGTAGTGCCAATATGGGAGAAGTCAGA  
>Python-mir-96-5p  
TTTTGGCACTAGCACATTTTTGCT

---

>Python-mir-96-3p  
CAATTATGTGTAGTGCCAATAT

>Python-mir-98\_pre  
GGGTGAGGTAGTAAGTTGTATTGTTGTGGGGTAGGGATTTGTGCCCAAATCAGAGATAACTATACAACCTTACTACTTTCCCT  
>Python-mir-98-5p  
TGAGGTAGTAAGTTGTATTGTT  
>Python-mir-98-3p  
CTATACAACCTTACTACTTTCC

>Python-mir-99a\_pre  
GTGCCAATTGGCATAAACCCGTAGATCCGATCTTGTGGTGAAATATAGTGCACAAGCTCGTTTTCTATGGGTCAGTGTGAGTCTGGTG  
>Python-mir-99a-5p  
AACCCGTAGATCCGATCTTGTGG  
>Python-mir-99a-3p  
CAAGCTCGTTTTCTATGGGTCAG

>Python-mir-99b\_pre  
GGCTTTGCCGGTTGCCATAAACCCGTAGATCCGAACCTTGCGGTACGACTGCCTCACACAAGCTCGAGTCTGTGGGTATGTGTCGACCTTGGC  
>Python-mir-99b-5p  
AACCCGTAGATCCGAACCTTGCG  
>Python-mir-99b-3p  
CAAGCTCGAGTCTGTGGGTATG

>Python-mir-100\_pre  
TGCCAGTTGCCACAAACCCGTAGATCCGAACCTTGTGCTCCTATCCTACACAAGCTTGTATCTATAGGTATGTGTCTGCTTGGCC  
>Python-mir-100-5p  
AACCCGTAGATCCGAACCTTGTG  
>Python-mir-100-3p  
CAAGCTTGTATCTATAGGTATG

>Python-mir-101-1\_pre  
AGGCTGCCCTGGCTCAGTTATCACTGTGCTGATGCTGTCTATACTAAAGGTACAGTACTGTGATAACTGAAGGATGGTAGCCA  
>Python-mir-101-1-3p  
TACAGTACTGTGATAACTGAAG  
>Python-mir-101-1-5p  
TCAGTTATCACTGTGCTGATGCT

>Python-mir-101-2\_pre  
TGTGAACTGTCCTTTTTTCGGTTATCATGGTACCGGTGCTGTATGTACGAAAGGTACAGTACTGTGATAACTGAAGAATGATAGTGCCATC  
>Python-mir-101-2-3p  
TACAGTACTGTGATAACTGAAG  
>Python-mir-101-2-5p  
TCGGTTATCATGGTACCGGTGCT

>Python-mir-103-1\_pre  
CTTGCTGTCTTCGGCTTCTTTACAGTGCTGCCTTGTTGCATATGGATCAAGCAGCATTGTACAGGGCTATGAGGACACCGAGT  
>Python-mir-103-2\_pre  
AGCTGGGCGCTTCCAGCTTCTTTACAGTGCTGCCTTGTTGCAACCATGTCAAGCAGCATTGTACAGGGCTATGAAAGAAC  
>Python-mir-103-3p  
AGCAGCATTGTACAGGGCTATGA

>Python-mir-106\_pre  
TCGGTGGTGCAAAAGTGCTTATAGTGCAGGTAGTCCAGTGATCTCTACTGCAGTGTTAGCACTTTCAGTGGCACAATG  
>Python-mir-106-5p  
AAAAGTGCTTATAGTGCAGGTAGT  
>Python-mir-106-3p

ACTGCAGTGTTAGCACTTCA

>Python-mir-107\_pre  
CTCTTTGCTTTTCAGCTTCTTTACAGTGTTCGCTTGTGGCATGGAGTTCAAGCAGCATTGTACAGGGCTATCAAAGCATAGAGA

>Python-mir-107-3p  
AGCAGCATTGTACAGGGCTATC

>Python-mir-107-5p  
AGCTTCTTTACAGTGTTCGCTTG

>Python-mir-122\_pre  
TTCTGCTGGAGCTTTGGAGTGTGACAATGGTGTGTTGTATCCAATCTCTCAAACGCCATTATCACACTAAATAGCTACTGTTAGA

>Python-mir-122-5p  
TGGAGTGTGACAATGGTGTGTTG

>Python-mir-122-3p  
AACGCCATTATCACACTAAATA

>Python-mir-124a\_pre  
CAAAGGCCCTCTCTGCGTGTTCACAGCGGACCTTGATTTAAATGTCCATACAATTAAGGCACGCGGTGAATGCTAAGAACGAGGCTGGAAA

>Python-mir-124a-3p  
TAAGGCACGCGGTGAATGCTAA

>Python-mir-124a-5p  
CGTGTTCACAGCGGACCTTGAT

>Python-mir-124b-1\_pre  
CGAGGCTCTGTCTCTCCGTGTTCACAGCGGACCTTGATTTAAATGTCCATACAATTAAGGCACGCGGTGAATGCCAAGAGCAGGGCTTGAAG

>Python-mir-124b-2\_pre  
CCTGGGCCCTTCTCTCCGTGTTCACAGCGGACCTTGATTTAAATGTCCATACAATTAAGGCACGCGGTGAATGCCAAGAGACCGGTTCCCTT

>Python-mir-124b-3\_pre  
CTTGGCTTAAGCCCTTCGTGTTCACAGCGGACCTTGATTTAAATTTGATACAATTAAGGCACGCGGTGAATGCCAAGAGAGAAGCCACGTC

>Python-mir-124b-3p  
TAAGGCACGCGGTGAATGCCAA

>Python-mir-124b-5p  
CGTGTTCACAGCGGACCTTGAT

>Python-mir-125a\_pre  
GGCATCTTCTCTGTCCCTGAGACCCTTAACCTGTGAGGAAGCCCAGAGGTCACAGGTGAGGGCCTTGGGAACTGAGTGG

>Python-mir-125a-5p  
TCCCTGAGACCCTTAACCTGTGA

>Python-mir-125b-1\_pre  
CCCTCTCTGTCCCTGAGACCCTAACTTGTGACGTTTTGGTTTTCAAGTCCACGGTTAGGCTCTCGGGAGCTGTGAGTTG

>Python-mir-125b-1-5p  
TCCCTGAGACCCTAACTTGTGA

>Python-mir-125b-2\_pre  
GACTTTTCTAGTCCCTGAGACCCTAACTTGTGAGGTTTTTTAGTAACAATACAAGTCAGGCTCTTGGGACCTAGGCGGAGGGGAACCA

>Python-mir-125b-2-5p  
TCCCTGAGACCCTAACTTGTGA

>Python-mir-125b-2-3p  
ACAAGTCAGGCTCTTGGGACCT

>Python-mir-126\_pre  
GCGGCTCATTATTACTTTTGGTACGCGCTGTGCCACTTCAAACCTCGTACCGTGAGTAATAATGCGCGGAGGGCCAGC

>Python-mir-126-5p  
CATTATTACTTTTGGTACGCGT

>Python-mir-126-3p  
TCGTACCGTGAGTAATAATGCG

---

---

```
>Python-mir-128-1_pre
TCATGAGCTGTTGGATTTCGGGGCCGTAACACTGTCTGAGAGGGTTACATTTCTCACAGTGAACCGGTCTCTTTTTTCAGCTGCTTTCTGGCTT
>Python-mir-128-1-3p
TCACAGTGAACCGGTCTCTTT
>Python-mir-128-1-5p
CGGGGCCGTAACACTGTCTGAGA

>Python-mir-128-2_pre
ATGTGCAGTTGGAAGGGGGCCGTTACACTGTAAGAGAGTGAGTAGCAGGTCTCACAGTGAACCGGTCTCTTTTTCTTACTGTGTACATCT
>Python-mir-128-2-3p
TCACAGTGAACCGGTCTCTTT

>Python-mir-129a_pre
TTCTCTCTCGGATCTTTTTGCGGTCTGGGCTTGCTGTTCCCTCCAATAAGTAGCCAGGAAGCCCTTACCCCAAAAAGTATTTGCGAGGGATC
>Python-mir-129a-5p
CTTTTTGCGGTCTGGGCTTGC
>Python-mir-129a-3p
AAGCCCTTACCCCAAAAAGTA

>Python-mir-129b_pre
GTCTTCTCTGGGTCTTTTTGCGGTCTGGGCTTTCTGGGTCTGTCCAACCCCGTATCAGAAAGCCCTTACCCCAAAAAGCATCCGGGGTTGTACGA
>Python-mir-129b-3p
AAGCCCTTACCCCAAAAAGCAT
>Python-mir-129b-5p
CTTTTTGCGGTCTGGGCTTTC

>Python-mir-130a_pre
GGCACGGCCCTGCCCCGAGGCTCTTTTTCACATTGTGCTACTGAGCCCCAACCAAGCAGTGCAATGTAAAAAGGGCATTGGGTGGTGGCCACAG
>Python-mir-130a-3p
CAGTGCAATGTAAAAAGGGCATTG
>Python-mir-130a-5p
AGGCTCTTTTTCACATTGTGCT

>Python-mir-130b_pre
GAGCAGTCTGCTACTCTTTCCCTTGTGGCGCTACTGTTTCAGCTTCGCCTCTAGCAGTGCAATAATGAAAGGGCATCAGCCCCCTCC
>Python-mir-130b-3p
CAGTGCAATAATGAAAGGGC

>Python-mir-130c_pre
CGCTCTCCTTGTGCTCTGTGCCCTTTTTCTGTTGTACTACTGGGAGCTCTCATTAGCAGTGCAATATTTAAAAGGGCATTGGCTGGCAGAGGTT
>Python-mir-130c-3p
CAGTGCAATATTTAAAAGGGCATT
>Python-mir-130c-5p
TGCCCTTTTTCTGTTGTACTACT

>Python-mir-130d_pre
AGAGGTGTCTGTCCACTGCCCTTTTTATGTTGTACTACTAGTGAACACACACAAAAAGCAGTGCAATGTTAAAAGGGCATTGGCCAGCAATGCT
>Python-mir-130d-3p
CAGTGCAATGTTAAAAGGGCAT
>Python-mir-130d-5p
GCCCTTTTTATGTTGTACTACT

>Python-mir-132_pre
GCGTCTCCAGGGCAACCGTGGCTTTAGATTGTTACTGTGTGGATGTGGGCTGGTAAACAGTCTACAGCCATGGTTGCCTGGAGTGGACG
>Python-mir-132-5p
ACCGTGGCTTTAGATTGTTACT
```

---

>Python-mir-132-3p  
TAACAGTCTACAGCCATGGTTG

>Python-mir-133a-1\_pre  
GAATGCTTTGCTAAAGCTGGTAAAATGGAACCAAATCAACTGTTCAATGGATTTGGTCCCCTTCAACCAGCTGTAGCTGTGCATTG  
>Python-mir-133a-1-3p  
TTTGGTCCCCTTCAACCAGCTGT  
>Python-mir-133a-1-5p  
AGCTGGTAAAATGGAACCAAAT

>Python-mir-133a-2\_pre  
CAATGCTTTGCTTAAGCTGGTAAAATGGAATCAAATCACATGTTTAATGGATTTGGTCCCCTTCAACCAGCTGTAGCTATGTATTGAT  
>Python-mir-133a-2-3p  
TTTGGTCCCCTTCAACCAGCTGT  
>Python-mir-133a-2-5p  
AGCTGGTAAAATGGAATCAAAT

>Python-mir-133b\_pre  
GAAGAAGAGCATTGCTCTGGCTGGTCAAAAGGAACCAAGGCCGCTTTTCTGGAGGTTTGGTCCCCTTCAACCAGCTATAGCAGTGCTGACCTT  
>Python-mir-133b-3p  
TTTGGTCCCCTTCAACCAGCTA  
>Python-mir-133b-5p  
GCTGGTCAAAAGGAACCAAGGCC

>Python-mir-133c\_pre  
TTCTTGTGCTCCTGGGGCTGGTAAAAAGGAACCAAGATCGACTGGCAACTGATTTGGTCCCCTTCAACCAGCTGGGGGGGCACAAAC  
>Python-mir-133c-3p  
TTTGGTCCCCTTCAACCAGCTGG

>Python-mir-135-1\_pre  
TATCCCATTTGCTTCTATGGCTTTTTTATTCCCTATGTGATTATATTGCTAATTTTCATATAGGGATTGAAGCCATGCAATACACTGGGGA  
>Python-mir-135-1-5p  
TATGGCTTTTTTATTCCCTATGTGA  
>Python-mir-135-1-3p  
ATATAGGGATTGAAGCCATGCAA

>Python-mir-135-2\_pre  
TTCACTCTAGTGTTTTTATGGCTTTTTTATTCCCTATGTGATAGTAATAAAGTCTCATGTAGGGATGGAAGCCATGAAATACATTGTGAAAA  
>Python-mir-135-2-5p  
TATGGCTTTTTTATTCCCTATGTGA  
>Python-mir-135-2-3p  
TGTAGGGATGGAAGCCATGAAA

>Python-mir-135-3\_pre  
TCCTCTGTTGTGGTCTATGGCTTTTTTATTCCCTATGTGATTGCTTTTCATAAATTCATGTAGGGCTAAAAGCCATGGGTACACAAAGGAAT  
>Python-mir-135-3-5p  
TATGGCTTTTTTATTCCCTATGTGA  
>Python-mir-135-3-3p  
ATGTAGGGCTAAAAGCCATGGG

>Python-mir-137a\_pre  
AGCTTTCCGACTCTCTTCGGTGACGGGTATTCTTGGGTGGATAATAACGGATTACGTTGTTATTGCTTAAGAATAACGCGTAGTCGAGGAGAGTACTC  
>Python-mir-137a-3p  
TTATTGCTTAAGAATAACGCGTAG  
>Python-mir-137a-5p  
ACGGGTATTCTTGGGTGGATAATA

---

```
>Python-mir-137b_pre
TGACTATGCTCCCTTCGATGACGGGTATTCTTGGGTATATAATACAGATGGCGTTGTTATTGCTTGAGAATACGCGTAGTTGAGGGGAAGTTGC
>Python-mir-137b-3p
TATTGCTTGAGAATACGCGTAG
>Python-mir-137b-5p
ACGGGTATTCTTGGGTATATAAT

>Python-mir-138-1_pre
TATTGTTGCTGCAGCTGGTGTGTGAATCAGGCCGACATAAAGTGCATCTTACTATCCGGCTATTTCACTACACCAGGGTCGCATCGTAC
>Python-mir-138-1-5p
AGCTGGTGTGTGAATCAGGCCG
>Python-mir-138-1-3p
GCTATTTCACTACACCAGGGT

>Python-mir-138-2_pre
GCTCAGTGTAGCAGCTGGTGTGTGAATCAGGCCGTCACCTATTAGAGAACGGCTACTTCACAACACCAGGGTTGCCCTGT
>Python-mir-138-2-5p
AGCTGGTGTGTGAATCAGGCCG

>Python-mir-139_pre
ATGGCCTGGCTGTATTCTACAGTGCATGTGTCTCCAGCGTCTGTAAGCAGCTGGAGATACGGCCCTGTTGGAATAACAGCCAGAGCTA
>Python-mir-139-5p
TCTACAGTGCATGTGTCTCCAGC
>Python-mir-139-3p
TGGAGATACGGCCCTGTTGGAAT

>Python-mir-142_pre
GACAGTGGACTCATCCATAAAGTAGAAAGCACTACTAAACGCTTGTGTCCAAGTGTAGTGTTCCTACTTTATGGATGAGTGTACTGTG
>Python-mir-142-5p
TCCATAAAGTAGAAAGCACTA
>Python-mir-142-3p
TAGTGTTCCTACTTTATGGA

>Python-mir-143_pre
TTTCGATGTCTCCAGCCCAAGGTGCAGTGTCTGCTGGTGCAGTTGTGAGTCTGAGATGAAGCACTGTAGCTCAGGAAGGGAGGA
>Python-mir-143-3p
TGAGATGAAGCACTGTAGCTC
>Python-mir-143-5p
GGTGCAGTGTCTGCATCTCTGGTC

>Python-mir-144_pre
GGGGCTCCAGCTCGGATATCATCATATACTGTAAGTTGGAATCAGACACTACAGTATAGATGATGTACTATCTGGAGCTCCTGGA
>Python-mir-144-3p
TACAGTATAGATGATGTACT
>Python-mir-144-5p
TCGGATATCATCATATACTGTAA

>Python-mir-145_pre
ACTATGTCTCCGGGTCCAGTTTTCCAGGAATCCCTTAGATGCTAAGAAGGGGATTCCTGGAAATACTGTTCTTGGGGTCATGGCTC
>Python-mir-145-5p
GTCCAGTTTTCCAGGAATCCCT
>Python-mir-145-3p
GGATTCCTGGAAATACTGTTCT

>Python-mir-146a_pre
TGCTTAGCTCTGAGAAGTGAATTCATAGGCTTTAGAAGAAATGAAACGCCCGTGGATTTCAGTTCTACAGCTAGACAGCT
>Python-mir-146a-5p
```

---

---

TGAGAACTGAATTCCATAGGCTT

>Python-mir-146b\_pre

GTCCCAGGCTCTGAGAACTGGTTTTGATGGACTAGTTTCCTTTTCAGTTTTTTTCAGTCCATAATATCCAGTTCTCTAGCTTGGCTGCA

>Python-mir-146b-5p

TGAGAACTGGTTTTTCATGGACT

>Python-mir-147\_pre

CACTCTATGAATCTAGTGGAACTCACTTCTGCACAAACTAGAGGATTGAAACCAGTGTGCGGAAATGCTTCTGCTACATTTTTAGAGTCTT

>Python-mir-147-3p

GTGTGCGGAAATGCTTCTGCTA

>Python-mir-148a\_pre

AGTTTTGGTTTTCTGGAAGCAAAGTTCTGTGACACTCGGACTCTGATTATAATAGAAGTCAGTGCACACTACAGAACTTTGTCTCCAGGGGCTGCAGCA

>Python-mir-148a-3p

TCAGTGCACACTACAGAACTTTGT

>Python-mir-148a-5p

CAAAGTTCTGTGACACTCGGACT

>Python-mir-148b\_pre

CTGTTACAGCGCTTGAGGTGAAGTTCTGTTATACACTTTGACTGTGGCTACATGGAAGTCAGTGCATCACAGAACTTTGTCTCGAGAGCTTTTCA

>Python-mir-148b-3p

TCAGTGCATCACAGAACTTTGT

>Python-mir-148b-5p

GAAGTTCTGTTATACACTTTGACT

>Python-mir-150\_pre

ACTCTTCTCCTTTCTCTCCCAACCCTTGTACCAGTGTGAGCTGTTGCACCTACTGGTACAGAGGATGGAAGGGAGAGTGGTTTCAGAG

>Python-mir-150-5p

TCTCCCAACCCTTGTACCAGTGA

>Python-mir-150-3p

CTGGTACAGAGGATGGAAGGGG

>Python-mir-153-1\_pre

TAGCAGTTGCCAGTGTCAATTTTTGTGATGTTGCAGCTAGTAATATAAGCCCAGTTGCATAGTCACAAAAGTGATCATTGGAAACTGT

>Python-mir-153-1-3p

TTGCATAGTCACAAAAGTGATCA

>Python-mir-153-1-5p

GTCATTTTTGTGATGTTGCAGCT

>Python-mir-153-2\_pre

TCTCTCACAGCTGCCAGTGTCAATTTTTGTGATTTGCAGCTAGTAATCCTGGCCCAGTTGCATAGTCACAAAAGTGATCATTGGCCACTGTGCCAGC

>Python-mir-153-1-3p

TTGCATAGTCACAAAAGTGATCA

>Python-mir-153-2-5p

TCATTTTTGTGATTTGCAGCTT

>Python-mir-155a\_pre

CAGGCCATACACTGTTAATGCTAATTGTGATAGGTGTTTTATCTCTGATCAACTCCTACATGTTAGCATTAAATAGGGTGTGGTG

>Python-mir-155a-5p

TTAATGCTAATTGTGATAGGTGT

>Python-mir-155b\_pre

CCAGACAGTGTAAATGCTACTCATGTTGGGAGTTTGAAATAACACTCACTCCTCTTCCAGTAGCATTACTCTTACTGA

>Python-mir-155b-5p (predicted)

TTAATGCTACTCATGTTGGGAGT



---

>Python-mir-181a-1\_pre  
TATGGTTGCTTCAGTGAACATTCAACGCTGTCGGTGAGTTTGGGATTAAAGTGAAAACCATCGACCGTTGATTGTACCCCTCCAGCTAACCATC  
>Python-mir-181a-1-5p  
AACATTCAACGCTGTCGGTGAGTTT  
>Python-mir-181a-1-3p  
ACCATCGACCGTTGATTGTACC

>Python-mir-181a-2\_pre  
GATAGCTTCAGCGAACATTCAACGCTGTCGGTGAGTTTGGACATGTCAGGATAAACCATCGACCGTTGACTGTACCTTGAGGTTTATCAC  
>Python-mir-181a-2-5p  
AACATTCAACGCTGTCGGTGAGTTT  
>Python-mir-181a-3\_pre  
CTGACAAAAGTTCTCAGGGAACATTCAACGCTGTCGGTGAGTTTGTGTCAGTGGGATTAAACCATCGACTGTTGAGTGTACCCCTGCGGCCTTTGC  
>Python-mir-181a-3-5p  
AACATTCAACGCTGTCGGTGAGTTT  
>Python-mir-181a-3-3p  
ACCATCGACTGTTGAGTGTACC

>Python-mir-181b-1\_pre  
GGTCACAATCAACATTCAATTGCTGTCGGTGGGTTTAACTTTGTGGACAAGCTCACTGAACAATGAATGCAACTGTGGCCCCA  
>Python-mir-181b-1-5p  
ACATTCATTGCTGTCGGTGGGTT  
>Python-mir-181b-1-3p  
GCTCACTGAACAATGAATGCAA

>Python-mir-181b-2\_pre  
TGGCTGCACTCAACATTCAATTGCTGTCGGTGGGTTTCGGGTTTCAGTCAGCCCTCTGGCCAATGAATGCAAACTGCGGATCAA  
>Python-mir-181b-2-5p  
ACATTCATTGCTGTCGGTGGGTT  
>Python-mir-181c\_pre  
GTCACAATCAACATTCAATTCTGTCGGTGGGTTGTTATGCTGGAGGAGAAGCTCACTGATCAGTGAATGCAACTGTGGC  
>Python-mir-181c-5p  
AACATTCATTCTGTCGGTGGGTT

>Python-mir-182\_pre  
CTCTCCCTCTTGCTGTCTTTGGCAATGGTAGAACTCACACTGGTGAGATATCTGGATCCGGTGGTTCTAGACTTGCCAACCTACCGCCTGGGGGTC  
>Python-mir-182-5p  
TTTGGCAATGGTAGAACTCACACT  
>Python-mir-182-3p  
TGGTTCTAGACTTGCCAACCT

>Python-mir-183\_pre  
TCCTGTTCTGTGTATGGCACTGGTAGAATTCACTGTGAAAACACTCGATCAGTGAATTACCAACGGGCCATAAACGGAGCAGAGAAAGAACC  
>Python-mir-183-5p  
TATGGCACTGGTAGAATTCACTG

>Python-mir-184\_pre  
AGTTCCCCACGTCTCCTTATCACTCTTCCAGCCAGCTTTCTTCTTGCAGTGTGGACGGGAGAACTGATAAGGGTATGTGGGTGACAC  
>Python-mir-184-3p  
TGGACGGGAACTGATAAGGGA

>Python-mir-190a\_pre  
CTCTGTGTGATATGTTTGGATATATTAGGTTGTAATTTGGCCCAACTATATATCAAACATTCTACGGTGTCTCGCTTTG  
>Python-mir-190a-5p  
TGATATGTTTGGATATATTAGGTTG

---

>Python-mir-190a-3p  
ACTATATATCAAACATTCT

>Python-mir-190b\_pre  
CCCAGCCTCTGTCTGATATGTTTGTATATTAAGTTGTTCTCTCTGGGAAACCCAACTAAATATCAGACATATTCCGACAGCGACTGGG  
>Python-mir-190b-5p (predicted)  
TGATATGTTTGTATATTAAGTTGT

>Python-mir-191\_pre  
TGGGCAACGGAATCCCAAAGCAGCTGTTTTCTCTGAGTCTTCCAGCTGCACTTGGATTCCGTTCTTTGCT  
>Python-mir-191-5p  
CAACGGAATCCCAAAGCAGCTG  
>Python-mir-191-3p  
GCTGCACTTGGATTCCGTTCT

>Python-mir-193a\_pre  
GAGCAGCTGGGAGTTTGGGGCTGGGTCTTTGCGGGCGAGATGAGAAGTTTCTGCCTTCAACTGGCCTACAAAGTCCCAGTTCTCGGCTCTTAACTT  
>Python-mir-193a-3p  
AACTGGCCTACAAAGTCCCAGT  
>Python-mir-193a-5p  
TGGGTCTTTGCGGGCGAGATGA

>Python-mir-193b\_pre  
AGGCTGTGAATCCGGGGCCGGGGCTTTGGGGCGAGATGAGCTTGCCCGGTATCCAACCTGGCCACAAAGTCCCAGTTCTGGGGTCACTTCTTTC  
>Python-mir-193b-3p  
AACTGGCCACAAAGTCCCAGTT

>Python-mir-194-1\_pre  
ACGGTGTATCAAGTGTAACAGCAACTCCATGTGGAATAAGCCTCTTTCCAGTGGAGGTGGTGTACTTTTTGAAAGCCACTGAC  
>Python-mir-194-1-5p  
TGTAACAGCAACTCCATGTGGA

>Python-mir-194-2\_pre  
GGTGTCTATCGGCTGTAACAGCAACTCCATGTGGAAGCATGAGGCAGTTCCCGTGGGGGGGCTGTTATTTTTGGATGGGCACT  
>Python-mir-194-2-5p  
TGTAACAGCAACTCCATGTGGA

>Python-mir-196a\_pre  
TCTGTGAATTAGGTAGTTTTCACGTTGTTGGGAATTCATTTTTAATACACAAGAACATAAAAACCTACCTGATTTACTCC  
>Python-mir-196a-5p  
TAGGTAGTTTTCACGTTGTTGGGA  
>Python-mir-196a-3p  
ACAAGAACATAAAAACCTACCTGA

>Python-mir-196b\_pre  
CTGTTCCGTGGTTTAGGTAGTTTTCATGTTGTTGGGGTTGGCTTTTTAACTCGGCAACAAGAACTGCCTTAATTACGT  
>Python-mir-196b-5p  
TAGGTAGTTTTCATGTTGTTGGG  
>Python-mir-196b-3p  
TCGGCAACAAGAACTGCCT

>Python-mir-196c\_pre  
TGGTCGGTGATTTAGGTAGTTTCTCGTTGTTGAGGCTGAACATTTCTCTCTCTGCAGCACGAACTGCCTTCATCACTTCAGTTT  
>Python-mir-196c-5p  
TAGGTAGTTTCTCGTTGTTGAG

>Python-mir-199-1\_pre

---

---

```
CCCAGTGTTCAGACTACCTGTTTCAGGAAACTACAAAGGTGTACAGTAGTCTGCACATTGGTTAGATTGGGTTTGGGA
>Python-mir-199-1-3p
ACAGTAGTCTGCACATTGGTT
>Python-mir-199-1-5p
CCCAGTGTTCAGACTACCTGTTCA

>Python-mir-199-2_pre
CCTGCTCCGTGCGCCCGAGTGTTCAGACTACCTGTTTCAGGACAATGCTGTTGTACAGTAGTCTGCACATTGGTTAGACTGGGCAAGGGAACG
>Python-mir-199-2-3p
ACAGTAGTCTGCACATTGGTT
>Python-mir-199-2-5p
CCCAGTGTTCAGACTACCTGTTCA

>Python-mir-199-3_pre
TCCACTCCGTCTTCCCAGTGTTCGGACTACCTGTTTCAGGACTACAAGATTGTACAGTAGTCTGCACATTGGTTAGGCTGTGCTGGGATACACAGCA
Python-mir-199-3-5p
CCCAGTGTTCGGACTACCTGTTTC
>Python-mir-199-3-3p
ACAGTAGTCTGCACATTGGTT

>Python-mir-200a_pre
GTGGTCTCTGTGGACATCTTACTAGACAGTGTGGATTTTGTCACTGTACTCTAACACTGTCTGGTAACGATGTTTAAAGAGCGAGCCA
>Python-mir-200a-3p
TAACACTGTCTGGTAACGATGTT
>Python-mir-200a-5p
CATCTTACTAGACAGTGTGGA

>Python-mir-200b_pre
TGAGAAACCATTCTCATCTTACTGGGCAGCGTTGGACGTTTTATGAGTTTTCTAATACTGCCTGGTAAAGATGTTAATGGCGTCTCC
>Python-mir-200b-3p
TAATACTGCCTGGTAAAGATG
>Python-mir-200b-5p
CATCTTACTGGGCAGCGTTGGA

>Python-mir-202_pre
TCCTATGCATATACTTCTTTGAGAATTGAATCTAAAGAGGCATACGGCATGGGAAAATGGGGCGATTGAGG
>Python-mir-202-5p
TTCTTATGCATATACTTCTTTG

>Python-mir-203_pre
GCTCTCTCAGCCTGCTGGGTGCAGTGGTTCTTAAACAGTTCAACAGTTCTGTAGCATAAATTGTGAAATGTTTAGGACCACTTGATCCGGACGGCTTG
>Python-mir-203-3p
GTGAAATGTTTAGGACCACTTG
>Python-mir-203-5p
AGTGGTTCTTAAACAGTTCAACA

>Python-mir-204-1_pre
AGTACCTATTTCATGTGACCTGTGGACTTCCCTTTGTCATCCTATGCCTGAGAATATATGAAGGGGGCTGGGAAGGCAAAGGGACGTTTCAGTTGTCA
>Python-mir-204-1-5p
TTCCCTTTGTCATCCTATGCCTG
>Python-mir-204-1-3p
GGCTGGGAAGGCAAAGGGACGTT

>Python-mir-204-2_pre
GACCACATGACCTGTGGGCTTCCCTTTGTCATCCTATGCCTGGAGCTCACAGTGAGGCAGGGCCAGCAAAGGGTTGCTCAGCTGTTGTCTC
>Python-mir-204-2-5p
TTCCCTTTGTCATCCTATGCCTG
```

---

>Python-mir-204-3\_pre  
CTTGGCTCTGTAGCTTTCCCTTTGTCATCCTATGCCTGAGAAATTCAGGGAGGCTGGGACGGTGAAGGGAAGCCCACAGCGTTATAGTT

>Python-mir-204-3-5p  
TTCCCTTTGTCATCCTATGCCTG

>Python-mir-204-3-3p  
GCTGGGACGGTGAAGGGAAGCC

>Python-mir-205a\_pre  
CCATGCATTCTGTTGTCCTTCATTCCACCGGAGTCTGTGGAATACCTAATCAGATTTTCAGTGGCGTGAAGTACATGAGACATGGAGTTG

>Python-mir-205a-5p  
TCCTTCATTCCACCGGAGTCTG

>Python-mir-205b\_pre  
CTTGGGTGCCCTTCATTCCACCGGAATCTGTAAAAGCAGACACCAGATTTCTGTGAAATGAAGCCCACCTGGCA

>Python-mir-205b-5p  
CCCTTCATTCCACCGGAATCTG

>Python-mir-206\_pre  
TTTCTCTTTTTGAGGGGACACGCTTCTTTATAATCCCATATGAATTACATTGCTATGGAATGTAAGGAAGTGTGTGGTTTCAGAAAGATGAAC

>Python-mir-206-3p  
TGGAATGTAAGGAAGTGTGTGG

>Python-mir-208\_pre  
CTAATGGAGAAGCTTTTGGCTCGGGTTATATTTGAAAATGGCAGTGTATAAGACGAGCAAAAAGCTTGTGGTTGGAGGAGAA

>Python-mir-208-5p  
AAGCTTTTGGCTCGGGTTATAT

>Python-mir-208-3p  
TAAGACGAGCAAAAAGCTTGT

>Python-mir-210\_pre  
CCAGAAGCAGGTGAGCCACTGACTAACGCACATTGTGCTGCTAATGTCCCCACTGTGCGTGTGACAGCGGCTAACCTGCTTCTAGGACA

>Python-mir-210-5p  
AGCCACTGACTAACGCACATTG

>Python-mir-210-3p  
CTGTGCGTGTGACAGCGGCTAA

>Python-mir-212\_pre  
CGGGACCTTGGCTCTAGACTGCTTACTGCTACAGGCAATGAGAGACACAGTAACAGTCTACAGTCATGGCTACTGAAGTCTGGCAGTGGC

>Python-mir-212-5p  
ACCTTGGCTCTAGACTGCTTACT

>Python-mir-212-3p  
TAACAGTCTACAGTCATGGC

>Python-mir-214\_pre  
TGGATAGAGTTGTCATGTGTCTGCCTGTCTACACTTGCTGTGCAGAACATCCTCTCACCTGTACAGCAGGCACAGACAGGCAGTCACATGACAATC

>Python-mir-214-5p  
TGCTGTCTACACTTGCTGTGC

>Python-mir-214-3p  
ACAGCAGGCACAGACAGGCAGT

>Python-mir-215\_pre  
ATGAGGTCCAGGGTAATGACCTATGATTTGACAGACTGTGCTATGTAAGTCTGCCTGTCATTTCTGTAGGCCAATACTCTGCATATCTTC

>Python-mir-215-5p  
ATGACCTATGATTTGACAGACT

>Python-mir-215-3p  
CCTGTCATTTCTGTAGGCCAATA

---

>Python-mir-216a\_pre  
GGCTGTGAATTGGTTTAAATCTCAGCTGGCAACTGTGAGCAGTTAATAAATTTCTCTCACAGTGGTATCTGGGATTATGCTAAACGCAGCAAT  
>Python-mir-216a-5p  
TAATCTCAGCTGGCAACTGTGA  
>Python-mir-216a-3p  
CACAGTGGTATCTGGGATTATG

>Python-mir-216b\_pre  
GGTCCCAGTCACAGATTGAGAAATCTCTGCAGGCAAATGTGATGTCATGATTGCAATCTCACAGTTACCAGTAGAGGTTCTGCAATCTGGAGGGC  
>Python-mir-216b-5p  
AAATCTCTGCAGGCAAATGTGA  
>Python-mir-216b-3p  
ACAGTTACCAGTAGAGGTTCT

>Python-mir-217\_pre  
TTTTGATGTCGAGATACTGCATCAGGAACTGATTGGATAATAATCAGGCACCATCAGTTCTTAATGCATTGCCTTCAGCATCTAAA  
>Python-mir-217-5p  
TACTGCATCAGGAACTGATT

>Python-mir-218-1\_pre  
GCGAGATTTTCTGTTGTGCTTGATCTAACCATGTGGTTGTGAGGTATGCGTAAAACATGGTTCTGTCAAGCACCATGGAACGTCACGCAGCT  
>Python-mir-218-1-5p  
TTGTGCTTGATCTAACCATGT  
>Python-mir-218-1-3p  
AAACATGGTTCTGTCAAGCACC

>Python-mir-218-2\_pre  
CCTGTTAATGGGATTTTCTTTGTGCTTGATCTAACCATGTGGTAGAACAATACAAATTTGAACATGGTTCTGTCAAGCACCATGGAAGGCTCCATG  
>Python-mir-218-2-5p  
TTGTGCTTGATCTAACCATGT

>Python-mir-219-1\_pre  
GGAGCCCTGGCCTGTGATTGTCCAAACGCAATTTCTTGTCTCTCCACCAGAGTTGAGTCTGGACATCATGAGCCGGGGT  
>Python-mir-219-2\_pre  
GAACCTTTGCTCCTGATTGTCCAAACGCAATTTCTTGTGCAGAAAAACATGCCAACCAAGAATTTGTGTCTGGACATCGGTGGCTAAGCCTTCGA  
>Python-mir-219-2-3p  
AGAATTGTGTCTGGACATCGGT  
>Python-mir-219-5p  
TGATTGTCCAAACGCAATTTCTTG

>Python-mir-221\_pre  
ATCCAGCCTTTGGGCCTTGACCTGGCATAACAATGTAGAATACTGTGTTTGTAAAGCAACAGCTACATTTGTCTGCTGGGTTTCAGGCTGTCTGGA  
>Python-mir-221-3p  
AGCTACATTTGTCTGCTGGGTTT  
>Python-mir-221-5p  
ACCTGGCATAACAATGTAGAATAC

>Python-mir-222a\_pre  
AGCTGCTCATCAGTCGCTCAGTAGTCAGTGTAGATTCTGTTTCTTCGGTCAGCAGCTACATCTGGCTACTGGGTCTCTGAAGACGTCTTG  
>Python-mir-222a-3p  
AGCTACATCTGGCTACTGGGTCTC  
>Python-mir-222a-5p  
CGCTCAGTAGTCAGTGTAGATTCT

>Python-mir-222b\_pre  
CTGATGTGAACAGGCTGCTCAGTAGTTGGTGTAGGATCTGTCCGATAAAAACCAACAGCTACATCTGATTACTGGGTCTCCTGTGGCATCA

---

>Python-mir-222b-3p  
AGCTACATCTGATTACTGGGTCT  
>Python-mir-222b-5p  
TGCTCAGTAGTTGGTGTAGGATC

>Python-mir-223\_pre  
CCTCAGTGTGGCCCTCTGTGTATTTGACAAGCTGGGTTC AACACTCAGTGTAGCAGTGT CAGTTTGTCAAATATACAAAGTGC GGCAATTT  
>Python-mir-223-3p  
TGTCAGTTTGTCAAATATACAA

>Python-mir-301a\_pre  
TTTTTGCTGCTGACAAGTGTCTGACTTCATTGCACTACTGTACTTCCCAGCTAGCAGTGC AATAGTATTGTCAAAGCACTTGCGAGCAGAA  
>Python-mir-301a-3p  
CAGTGC AATAGTATTGTCAAAGC  
>Python-mir-301a-5p  
GCTCTGACTTCATTGCACTACC

>Python-mir-301b\_pre  
CTGCTGGAACCGCTGGCTCTGACAATGTTGCACTACTGTTTTTCACAAATTTAGCAGTGC AATAATATTGTCAAAGCAATTTGGTTCTAGTCCTG  
>Python-mir-301b-3p  
CAGTGC AATAATATTGTCAAAGC

>Python-mir-338\_pre  
TGTTCCCTCCCCGTCAACAATATCCTGGTGCTGAGTGAGTGGCACTCAGAGACTCCAGCATCAGTGATTTTTGTTGAAGAGGGGGTGCT  
>Python-mir-338-3p  
TCCAGCATCAGTGATTTTTGTTGA  
>Python-mir-338-5p  
AACAATATCCTGGTGCTGAGTGAGT

>Python-mir-363\_pre  
GTGTTGCTGTTGTGCGGGTGATCACGGTGCAATTTTTGATTAGATTAGCAGGACGGAAATTCACGGTATCCATCTGTAAACCGCAGGACC  
>Python-mir-363-3p  
AATTGCACGGTATCCATCTGTAA

>Python-mir-365-1\_pre  
GCAGGGAAAATGAGGGACTTTTGGGGGCAGCTGTGTTCTTCCATGCTACCATAATGCCCCCTAAAAATCCTTATTGCTCTTGC  
>Python-mir-365-2\_pre  
AAGAAAATGAGGGACTTTTCAGGGGCAGCTGTGTTTTACTAACCCAGTCATAATGCCCCCTAAAAATCCTTATTGTTTC  
>Python-mir-365-3p (predicted)  
AATGCCCCCTAAAAATCCTTA

>Python-mir-375\_pre  
GCACTAGCTGGGCTTGCCTCGCGTCGAGCCCCACGCACAAGACCTGACGTGAATGTTTTGTTTCGTTTCGGCTCGCGTTAGGCAGGTCCAGCCTGTCT  
>Python-mir-375-3p  
TTTTGTTTCGTTTCGGCTCGCGTTA

>Python-mir-383\_pre  
CAGTCACCTGCTCCTCAGATCAGAAGGTGATTGTGGCTTTGGTTTTGATATGAAACAGCCACAGCACTGCCTGGTCAGAAAGAGCAAGTGTACT  
>Python-mir-383-5p  
AGATCAGAAGGTGATTGTGGCT  
>Python-mir-383-3p  
CCACAGCACTGCCTGGTCAGA

>Python-mir-425\_pre  
GGAAGAGAAAATTGCCGAGGAATGACACGATCACTCCCCTGAGCGAGTGGACGCAGAGCCACGGGGCTGTCGTGTCTGTCTGAGCTTTTTTCC  
>Python-mir-425-5p  
AATGACACGATCACTCCCCTGAG

---

>Python-mir-425-3p  
CACGGGGCTGTCGTGTCTGTCC

>Python-mir-429\_pre  
GCGCCTGCCGATCGCTGTCTTACCAGACAAATTTAGATCTTAATCTATTCTGTCTAATACTGTCTGGTAATGCCGTCGATTTCGCATTGGCAA  
>Python-mir-429-3p  
TAATACTGTCTGGTAATGCCGT

>Python-mir-449a\_pre  
GTGTGTAGTGGAAATGGCAGTGTATTGTTAGCTGGATGGATATCCAAATGGCACCAGCTGACATTCAGCTGCCAGCCTACGGCACATA  
>Python-mir-449a-5p  
TGGCAGTGTATTGTTAGCTGGA

>Python-mir-449b\_pre  
AACCTGTGACTGATAGGCAGTGTAGAATTAGCTGGCTGCTTTGTTTAAATTCTAGCAGTCGCTACCACACTGCTATCTGCTGCAGGAACTCT  
>Python-mir-449b-5p  
AGGCAGTGTAGAATTAGCTGGCT  
>Python-mir-449b-3p  
CAGTCGCTACCACACTGCTATCT

>Python-mir-449c\_pre  
TGTGTCACTTTGGCAGTGCAGTACTAGCTGGCTGTTTGGATACCTTCTGTGTTACAGCAGCTGGTTGCACTCCAGAGTGTGCATTTC  
>Python-mir-449c-5p  
TGGCAGTGCAGTACTAGCTGGCT

>Python-mir-449d\_pre  
TGTGTGTGATGGTTTGGCAGTGTACTTCTTAGTTAGCTGTTGTACATATTCCAGCAACTAAATACACTTCCATATTATTGCACA  
>Python-mir-449d-5p (predicted)  
TGGCAGTGTACTTCTTAGTTAG

>Python-mir-454\_pre  
AGGATAAAACCCTATCAATATTGCCTCTGCTTCTTCACTCGGTCTTAGTAGTGCAATATTGCTAATAGGGTCTTTTCTTT  
>Python-mir-454-3p (predicted)  
TAGTGCAATATTGCTAATAG

>Python-mir-455\_pre  
GATCCCTGGTGTGAGGGTATGTGCCCTTGGACTACATCGTGAAATATCACCATGCAGTCCATGGGCATATACACTTGCCCCAAGGTTTC  
>Python-mir-455-5p  
TATGTGCCCTTGGACTACAT  
>Python-mir-455-3p  
GCAGTCCATGGGCATATACAC

>Python-mir-456\_pre  
TGTGTATGTGTGCGCAGGCATCTTCTCAGCCTACATGTGGATTCTTAAATCTGCAGGCTGGTTAGATGGTTGTCATACATTCATC  
>Python-mir-456-3p  
CAGGCTGGTTAGATGGTTGTCT  
>Python-mir-456-5p  
GCAGGCATCTTCTCAGCCTAC

>Python-mir-458\_pre  
CATGGTGCAGATGGCAGCGCCATTTTTCAGAGCTATAAACAGTATCATTTGTCATAGCTCTTTGAATGGTACTGCCGTATGTACCG  
>Python-mir-458-3p  
ATAGCTCTTTGAATGGTACTGC

>Python-mir-489\_pre  
GTGATGGCTTGGTGGTTCGTATGTATGACGTCATTTACTTGTACTTTTAGGAGTGACATCTTATGTACGGCTGCTAAACTGCCACATG  
>Python-mir-489-3p (predicted)

GTGACATCTTATGTACGGCTGC

>Python-mir-490\_pre  
ATGTTTCATGATTTCGACACCATGGATCTCCAGGTGGGTCAAGATTATAGAGAAACACCAACCTGGAGGACTCCATGCTGTTGAGCTGTTTACAAGC

>Python-mir-490-3p  
CCAACCTGGAGGACTCCATGCTG

>Python-mir-490-5p  
CCATGGATCTCCAGGTGGGTC

>Python-mir-499\_pre  
CTGAGGGAGAGGCAGTTAAGACTTGCAGTGATGTTTAGATAAATTTATTACATAAACATCACTTTAAGTCTGTGCTATTTCTCTCCTCAC

>Python-mir-499-3p  
AACATCACTTTAAGTCTGTGCT

>Python-mir-499-5p  
TTAAGACTTGCAGTGATGTTTA

>Python-mir-551a\_pre  
TTGCCTGTTGTTTACCTGGGAAATCAAGAATGGGTGGGGCCTGTGAATATGAGAGGAGGCGACCCACTCTTGGTTTCCAAGGTCAGCAGGGA

>Python-mir-551a-3p (predicted)  
GCGACCCACTCTTGGTTTCCAA

>Python-mir-551b\_pre  
ACCTCCATTGGCTCCAGAAATCAAGGCTGGGTGAGACCTCGTGAAGAACTAGAAGGCGACCCATACTTGGTTTTCAGGAGCTGTGAGGATA

>Python-mir-551b-3p  
GCGACCCATACTTGGTTTTCAGT

>Python-mir-551b-5p  
GAAATCAAGGCTGGGTGAGACCT

>Python-mir-599\_pre  
GAACATCCACAGTGTGTTTGTATAAGCTGACATGGGACAGGAATTTCTTTTTCACTGTTGTGTCAATTTATCAAACCCATACGTGGATAGCAA

>Python-mir-599-3p (predicted)  
GTTGTGTCAATTTATCAAACCC

>Python-mir-737\_pre  
GCTACTCTGCTGTTGTTTCTTAGGTTTTGATTTTTATGCCATGCTCATGTGAAAATCAAACCTAAAGAAAATGCTGCAAAGATAGAT

>Python-mir-737-3p  
AATCAAACCTAAAGAAAATG

>Python-mir-737-5p  
GTTTTCTTAGGTTTTGATTTT

>Python-mir-875\_pre  
GTTTAGTGGTACAATACCTCAGCCTTATCAGGTGCTATATATATATTACCTGGAAGTTCTGAGGTTGAGTTTCACTGAAC

>Python-mir-875-5p  
AATACCTCAGCCTTATCAGGTG

>Python-mir-1306\_pre  
ATGAACAGCCTCCACCACCTCCCCTGCAAACGTCCAGTGACGCAGAGGTAATGGACGTTGGCTCTGGTGGTGATGGACAGTCAGATAC

>Python-mir-1306-3p  
TGGACGTTGGCTCTGGTGGTGA

>Python-mir-1329\_pre  
CATCTGGTTGTAGGGGTACAGTGATCAGGTTACGACGGATTTCTCTAGTAACAACCCCGTAGCTTGATCACCATCTCCCTATGACTCAGAT

>Python-mir-1329-3p  
CCCCGTAGCTTGATCACCATCT

>Python-mir-1329-5p  
TACAGTGATCAGGTTACGACGGAT



---

```
>Python-mir-1388_pre
AAGCTGAGGAGTGTTC AAGGACTGTCTAACCTGAGAATGGTGAAACAAAATGCTCAATCTCAGGTCCGTCAGCCCATGAGACGTTTCCTTCT
>Python-mir-1388-5p
AGGACTGTCTAACCTGAGAATG
>Python-mir-1388-3p
AATCTCAGGTCCGTCAGCCCATG

>Python-mir-1397_pre
AGTGCGATGTGTGCATTGCATTGCGACGGGTTACATCACTGGTCATAACATGATGTAACCCAACGCAGCATGATGTAAGCATCGTGAT
>Python-mir-1397-5p
TGCATTGCGACGGGTTACATC
>Python-mir-1397-3p
ATGTAACCCAACGCAGCATGA

>Python-mir-1641_pre
ATACAGGGCTTTTCTGGGATCAATGACCATCTGGGGTCATCATCTCCTCCAAGTTAGTTATTAATCCTTAGGAAACACTTGGTGCTTTT
>Python-mir-1641-5p (predicted)
TGGGATCAATGACCATCTGGG

>Python-mir-1662_pre
CTGTGGGTTTGACATCATCATACTTGGGATGTGCTAACATTA AAAACCCCAAGCAGGTTGATGTCTGGCCCAAGATGG
>Python-mir-1662-5p (predicted)
TTGACATCATCATACTTGGGA

>Python-mir-1677_pre
GCTGAGGTCCTGAACCAAAGCCCTCGAGGACAATGTGCGTCTTTCTATTGACTTCAGTGGGCTTAGGATCAGGCCCTTAATGCATAG
>Python-mir-1677-3p
TGACTTCAGTGGGCTTAGGATC
>Python-mir-1677-5p
ACCAAAGCCCTCGAGGACAAT

>Python-mir-1788_pre
ATACCTACTTGTGCTGGGCTTGTTTTTCAGTTGCCTGCGGCTGGCTAAATATGACTCAGGCAGCTAAAGCAAGTCTGGGGCATGAAAGGTG
>Python-mir-1788-3p
CAGGCAGCTAAAGCAAGTCTG
>Python-mir-1788-5p
GGCTTGTTTTTCAGTTGCCTG

>Python-mir-1805_pre
GAATGGAATATTCTAGGAGTTGTAGTGTTC AAACAGAGCTTTGCAAGAACATACCTGTATTGGAACACTACAGCTCCAGGAACTTCCTAGTGT
>Python-mir-1805-3p
TGTATTGGAACACTACAGCTCC
>Python-mir-1805-5p
AGTTGTAGTGTTC AAACAGA

>Python-mir-2188_pre
TCACACTTGTGGTCAAGGTCCAACCTCATGTGTCTGTATGCAATGAAAGTGGGATGCATGTGGTCAGACCTAGACCACAAGGCCAGTGG
>Python-mir-2188-5p
AAGGTCCAACCTCATGTGTCTT
>Python-mir-2188-3p
GATGCATGTGGTCAGACCTAGA

>Python-mir-2970_pre
CATCTTCTGCCACTGCTGACAGTCAGTAGTTGGTCTGGGGTAAGCAGGAAATCTCAGATCATCTCTTGACTGTGGATGGTGTAGGGGAA
>Python-mir-2970-5p
TGACAGTCAGTAGTTGGTCTGGG
>Python-mir-2970-3p
```

CAGATCATCTCTTGACTGTGGA

>Python-mir-3064\_pre

TTTTTCATCTGGCTGTTGTGGTGTGCAAAATTTTGTACATTGCTTTTGTGCTGCAACTTTTACAGATGTGGAAGATGTG

>Python-mir-3064-3p (predicted)

TGCTGCACTGCAACACTTTACA

>Python-mir-3618\_pre

GAATGCATTGTGATTTCCAGTAATTGAGACAGTGATTCTGAAAGCTGTCCACATTAATGAAAAGAACAATGTAGTCA

>Python-mir-3618-5p

TGATTTCCAGTAATTGAGACAGT

>Python-mir-5420\_pre

ACTGACTGAGCCTTGCCAGACATGGGCACCTTTCTTTTTTCTAATCTGGAAAGTGCTTCATTGTTTGGGTGAGGCTCTGGTTCAGG

>Python-mir-5420-3p

AAAGTGCTTCATTGTTTGGGT

>Python-novel-1\_pre

TCATGTATATTCACAGTGCATCATGGGATATGTAGTTGCTAAAAATACATTTCCCTTTCATGTGCTGTGTGTATGCCTGAG

>Python-novel-1-3p

CATTTCCCTTTCATGTGCTGTG

>Python-novel-1-5p

CAGTGCATCATGGGATATGTA

>Python-novel-2\_pre

GTGGAAGTTAAGACTATACTTTCAGGGATCATTTCTATAGTATCTAACTGGAGAAATGCACTCGAAAGTGATTGGCCGAACGAACCAC

>Python-novel-2-5p

TACTTTCAGGGATCATTTCTATAG

>Python-novel-2-3p

GAGAAATGCACTCGAAAGTGAT



Supplemental File 6 – Age constraints for nodes for Bayesian analysis (Fig. 1)

| Node                                                              | Age-indicative fossil         | Hard Minimum (Ma) | Soft Maximum (Ma)     | Reference            |
|-------------------------------------------------------------------|-------------------------------|-------------------|-----------------------|----------------------|
| <i>Gallus-Taenopygia-Columba</i>                                  | <i>Vegavis</i>                | 66                | 86.5                  | Benton et al. 2009   |
| <i>Chrysemys-Chelonia</i>                                         | <i>Lindholmemyx</i>           | 88.6              | 149.6                 | Joyce et al. 2014    |
| <i>Anolis-Python</i>                                              | <i>Haasiophis</i>             | 99.6-93.5         | None (point estimate) | Tchernov et al. 2000 |
| ( <i>Chrysemys +Chelonia</i> )-<br>( <i>Apalone +Pelodiscus</i> ) | <i>Pantrionichidae indet.</i> | 125+-1            | 199.6+-0.6            | Joyce et al. 2013    |
| Birds-Crocodylians                                                | <i>Arizonasaurus</i>          | 239               | 250.4                 | Benton et al. 2009   |
| Lepidosauers-Archosaurs                                           | <i>Protorosaurus</i>          | 255.9             | 299.8                 | Benton et al. 2009   |
| Mammals-Reptiles                                                  | <i>Hylonomus</i>              | 312.3             | 330.4                 | Benton et al. 2009   |
| Xenopus-Amniotes                                                  | <i>Lethiscus</i>              | 330.4             | 350.1                 | Benton et al. 2009   |
| Coelacanth-Tetrapods                                              | <i>Eoactinistia</i>           | 407-409           | None (point estimate) | Johanson et al. 2006 |
| Zebrafish-Tetrapods                                               | <i>Psarolepis</i>             | 416               | 421.75                | Benton et al. 2009   |

Benton, M. J., Donoghue, P. C. J. & Asher, R. J. in *The Timetree of Life* (eds. Hedges, S. B. & Kumar, S.) 35-86 (Oxford University Press, Oxford, 2009).

Johanson, Z., Long, J. A., Talent, J. A., Janvier, P. & Warren, J. W. Oldest coelacanth, from the Early Devonian of Australia. *Biology Letters* **2**, 443-446 (2006).

Joyce, W. G., Parham, J. F., Lyson, T. R., Warnock, R. C. M. & Donoghue, P. C. J. A divergence dating analysis of turtles using fossil calibrations: an example of best practices. *Journal of Paleontology* **87**, 612-634 (2013).

Tchernov, E., Rieppel, O., Zaher, H., Polcyn, M. J. & Jacobs, L. L. A fossil snake with legs. *Science* **287**, 2010–2012 (2000).

#NEXUS

[!Created by MacVector on Nov 18 2013 at 12:47:36.]

BEGIN DATA;

DIMENSIONS NTAX=19 NCHAR=20539;

FORMAT MISSING=N GAP=- INTERLEAVE DATATYPE=DNA;

MATRIX

```
Hsa AGGTTGAGGTAGTAGGTTGTATAGTTTAGAATTACATCAAGGGAGATAAACTGTACAGCCT [ 60 ]
Mmu AGGTTGAGGTAGTAGGTTGTATAGTTTAGAGTTACATCAAGGGAGATAAACTGTACAGCCT [ 60 ]
Mdo AGGTTGAGGTAGTAGGTTGTATAGTTTAGAATTACATCAAGGGAGATAAACTGTACAGCCT [ 60 ]
Meu AGGTTGAGGTAGTAGGTTGTATAGTTTACAATTACATCAAGGGAGATAAACTGTACAGCCT [ 60 ]
Oan AGGCTGAGGTAGTAGGTTGTATAGTTTAGAATTACATCAAGGGAGATAAACTGTACAGCCT [ 60 ]
Aca AGGTTGAGGTAGTAGGTTGTATGGTTTAGAATTACACCAAGGGAGATAAACTGTACAACCT [ 60 ]
Pbi AAGCTGAGGTAGTAGGTTGTATGGTTTAGAATTACACCAAGGGAGATAAACTGTACAGCCT [ 60 ]
Cpi AGGTTGAGGTAGTAGGTTGTATAGTTTAGAATTACACCAAGGGAGATAAACTGTACAACCT [ 60 ]
Cmy AGGTTGAGGTAGTAGGTTGTATAGTTTAGAATTACACCAAGGGAGATAAACTGTACAACCT [ 60 ]
Psi AGGTTGAGGTAGTAGGTTGTATAGTTTAGAATTACACCACGGGAGATAAACTGTACAACCT [ 60 ]
Asp AGGTTGAGGTAGTAGGTTGTATAGTTTAGAATTACACCACGGGAGATAAACTGTACAACCT [ 60 ]
Ami AGGTTGAGGTAGTAGGTTGTATAGTTTAGAATTGACACCAAGGGAGATAAACTGTACAACCT [ 60 ]
Asi AGGTTGAGGTAGTAGGTTGTATAGTTTAGAATTGACACCAAGGGAGATAAACTGTACAACCT [ 60 ]
Tgu AGGTTGAGGTAGTAGGTTGTATAGTTTAGAATTACACCAAGGGAGATAAACTGTACAACCT [ 60 ]
Cli AGGTTGAGGTAGTAGGTTGTATAGTTTAGAATTACACCAAGGGAGATAAACTGTACAACCT [ 60 ]
Gga AGGTTGAGGTAGTAGGTTGTATAGTTTAGAATTACACCAAGGGAGATAAACTGTACAACCT [ 60 ]
Xtr ----- [ 0 ]
Lch AGGCTGAGGTAGTAGGTTGTATAGTTTAGAATTACACCAAGGGAGATAAACTGTACAACCT [ 60 ]
Dre AGGCTGAGGTAGTAGGTTGTATAGTTTAGAATAACATCACTGGAGATAAACTGTACAACCT [ 60 ]

Hsa CCTAGCTTTCCCT--GGGCTGAGGTAGGAGGTTGTATAGTTGAGGAGGACACCCAA---GG [ 115 ]
Mmu CCTAGCTTTCCCT--GGGCTGAGGTAGGAGGTTGTATAGTTGAGGAAGACACCCGA---GG [ 115 ]
Mdo CCTAGCTTTCCCT----- [ 72 ]
Meu CCTAGCTTTCCCT----- [ 72 ]
Oan CCTAGCTTTCCC----- [ 72 ]
Aca CCTAGCTTTCCCT--GAGTTGAGGTAGTAGGTTGTATGGTTTAGAATAACACCATCA--GG [ 116 ]
Pbi CCTAGCTTTACT--GTGTTGAGGTAGTAGGTTGTATGGTTGAGAATAACACCATCA--GG [ 116 ]
Cpi CCTAGCTTTCCCT--AGGCTGAGGTAGTAGGTTGTATGGTTTAGAATAACACCCGCA--GG [ 116 ]
Cmy CCTAGCTTTCCCT--AGGCTGAGGTAGTAGGTTGTATGGTTTAGAATAACACCCGCA--GG [ 116 ]
Psi CCTAGCTTTCCCT--AGGCTGAGGTAGTAGGTTGTATGGTTTAGAATAACACCAGCA--GG [ 116 ]
Asp CCTAGCTTTCCCT--AGGCTGAGGTAGTAGGTTGTATGGTTTAGAATAACACCAGCA--GG [ 116 ]
Ami CCTAGCTTTCCCT--GGGGTGAGGTAGTAGGTTGTATGGTTTAGAGTCACACCCCC---GG [ 115 ]
Asi CCTAGCTTTCCCT--GGGGTGAGGTAGTAGGTTGTATGGTTTAGAGTCACACCCCC---GG [ 115 ]
Tgu CCTAGCTTTCCCT----- [ 72 ]
Cli CCTAGCTTTCCCT----- [ 72 ]
Gga CCTAGCTTTCCCT----- [ 72 ]
Xtr -----AGGCTGAGGTAGTAGGTTGTATAGTTGAGGATAACACCAAA---GG [ 43 ]
Lch CCTAGCTTTCCC----- [ 72 ]
Dre CCTAGCTTTCCC--GGTGTGAGGTAGTTGGTTGTATGGTTTTCATAATAAACAGCCCGG [ 118 ]

Hsa AGATCACTATACGGCCTCCTAGCTTTCCCC--CGGGTTGAGGTAGTAGGTTGTATGGTTT [ 173 ]
Mmu AGATCACTATACGGCCTCCTAGCTTTCCCC--CGGGTTGAGGTAGTAGGTTGTATGGTTT [ 173 ]
Mdo ----- [ 72 ]
Meu -----CAGGTAGAGGTAGTAGGTTGTATGGTTT [ 100 ]
Oan -----CGGGTTGAGGTAGTAGGTTGTATGGTTT [ 100 ]
Aca AGATAACTGTACAGCCTCCTAGCTTTCCCC--CGGGTTGAGGTAGTAGGTTGTATGGTTT [ 174 ]
Pbi AGATAACTATACAGCCTCCTAGCTTTCCCT--CGGGTTGAGGTAGTAGGTTGTATGGTTT [ 174 ]
Cpi AGATAACTGTACAGCCTCCTAGCTTTCCCT--CGGGTTGAGGTAGTAGGTTGTATGGTTT [ 174 ]
Cmy AGATAACTGTACAGCCTCCTAGCTTTCCCT--CGGGTTGAGGTAGTAGGTTGTATGGTTT [ 174 ]
Psi AGATAACTGTACAGCCTCCTAGCTTTCCCT--CGGGTTGAGGTAGTAGGTTGTATGGTTT [ 174 ]
```

Asp AGATAACTGTACAGCCTCCTAGCTTTCCCT--CGGGTTGAGGTAGTAGGTTGTATGGTTT [174]  
Ami AGATAACTGTACAGCCTCCTAGCTTTCCCC--CGGGTTGAGGTAGTAGGTTGTATGGTTT [173]  
Asi AGATAACTGTACAGCCTCCTAGCTTTCCCC--CGGGTTGAGGTAGTAGGTTGTATGGTTT [173]  
Tgu -----CGGGTTGAGGTAGTAGGTTGTATGGTTT [100]  
Cli -----CGGGTTGAGGTAGTAGGTTGTATGGTTT [100]  
Gga -----CGGGTTGAGGTAGTAGGTTGTATGGTTT [100]  
Xtr AGATAACTGTACAGCCTCCTATCTTTCCCT--CAGGTTGAGGTAGTAGGTTGTATGGTTT [101]  
Lch -----CAGGTTGAGGTAGTAGGTTGTATGGTTT [100]  
Dre AGTTAACTGTACAACCTTCTAGCTTTCCCT--CAGGCTGAGGTAGTAGGTTGTATAGTTT [176]

Hsa AGAGTTACACCCTGGGAGTTAACTGTACAACCTTCTAGCTTTCCCT--TAGGAAGAGGTAG [231]  
Mmu AGAGTTACACCCTGGGAGTTAACTGTACAACCTTCTAGCTTTCCCT--TAGGAAGAGGTAG [231]  
Mdo -----TAGGAAGAGGTAG [85]  
Meu AGAATTATACCCTGGGAGTTAAACCGTACAACCTTCTAGCTTTCCCT--TAGGAAGAGGTAG [158]  
Oan AGAGTCACACCCCGGGAGTTAACTGTACAACCTTCTAGCTTTCCCT--TAGGAAGAGGTAG [158]  
Aca AGAGTTACACCCTGGGAGTTAACTGTACAACCTTCTAGCTTTCCCT--TAGGAAGAGGTAG [232]  
Pbi AGAATTACACCC--AGGAGTTAACTGTACAACCTTCTAGCTTTCCCT--TAGGAAGAGGTAG [231]  
Cpi AGAGTTACACCCTGGGAGTTAACTGTACAACCTTCTAGCTTTCCCT--TAGGAAGAGGTAG [232]  
Cmy AGAGTTACACCCTGGGAGTTAACTGTACAACCTTCTAGCTTTCCCT--TAGGAAGAGGTAG [232]  
Psi AGAGTTACACCCTGGGAGTTAACTGTACAACCTTCTAGCTTTCCCT--TAGGAAGAGGTAG [232]  
Asp AGAGTTACACCCTGGGAGTTAACTGTACAACCTTCTAGCTTTCCCT--TAGGAAGAGGTAG [232]  
Ami AGAGTTACACCCTGGGAGTTAACTGTACAACCTTCTAGCTTTCCCT--TAGGAAGAGGTAG [231]  
Asi AGAGTTACACCCTGGGAGTTAACTGTACAACCTTCTAGCTTTCCCT--TAGGAAGAGGTAG [231]  
Tgu AGAGTTACACCCTGGGAGTTAACTGTACAACCTTCTAGCTTTCCCT--TAGGAAGAGGTAG [158]  
Cli AGAGTTACACCCTGGGAGTTAACTGTACAACCTTCTAGCTTTCCCT--TAGGAAGAGGTAG [158]  
Gga AGAGTTACACCCTGGGAGTTAACTGTACAACCTTCTAGCTTTCCCT--TAGGAAGAGGTAG [158]  
Xtr AGAATGACACCCTGGGAGTTAACTGTACAACCTTCTAGCTTTCCCT----- [146]  
Lch AGAATTATACCCTGGGAGTTAACTGTACAACCTTCTAGCTTTCCCT--TGGGTAGAGGTAG [158]  
Dre AGAATAACATCACTGGGAGATAACTGTACAACCTCCTAGCTTTCCC----- [221]

Hsa TAGGTTGCATAGTTTTAGGGCAGGGATTTTGCCCAAGGAGGTAACCTATACGACCTGCT [291]  
Mmu TAGGTTGCATAGTTTTAGGGCAGAGATTTTGCCCAAGGAGTAACTATACGACCTGCT [291]  
Mdo TAGGTTGCATAGTTTTAGGGCAGGGATTTTGCCCAAGGAGTAACTATACAACCTGCT [145]  
Meu TAGGTTGCATAGTTTTAGGGCAGGGATTTTGCCCAAGGAGTAACTATACAACCTGCT [218]  
Oan TAGGTTGCATAGTTTTAGGGCAGTGATTTTGCTCATAAGGTGTTAACTATACAACCTGCT [218]  
Aca TAGGTTGCATAGTTTTAGGGCAGTGTTTTGCCCCAAAAGGAGTAACTATACAACCTGCT [292]  
Pbi TAGGTTGCATAGTTTTAGGGCAGTGTTTTGCTCATAAGGAGTAACTATACAACCTGCT [291]  
Cpi TAGGTTGCATAGTTTTAGGGCAGAGATTTTGCTCACAAGGAGTAACTATACAACCTGCT [292]  
Cmy TAGGTTGCATAGTTTTAGGGCAGGGATTTTGCTCACAAGGAGTAACTATACAACCTGCT [292]  
Psi TAGGTTGCATAGTTTTAGGGCAGGGATTTTGCTCACAAGGAGTAACTATACAACCTGCT [292]  
Asp TAGGTTGCATAGTTTTAGGGCAGGGATTTTGCTCACAAGGAGTAACTATACAACCTGCT [292]  
Ami TAGGTTGCATAGTTTTAGGGCAGGGATTTTGCTCACACGGAGTAACTATACAACCTGCT [291]  
Asi TAGGTTGCATAGTTTTAGGGCAGGGATTTTGCTCACACGGAGTAACTATACAACCTGCT [291]  
Tgu TAGGTTGCATAGTTTTAGGGCAGGGATTTTGCTCAGAAGGAGGTAACCTATACAACCTGCT [218]  
Cli TAGGTTGCATAGTTTTAGGGCAGGGATTTTGCTCACAAGGAGGTAACCTATACAACCTGCT [218]  
Gga TGGGTTGCATAGTTTTAGGGCAGGGATTTTGCTCACAAGGAGGTAACCTATACAACCTGCT [218]  
Xtr ----- [146]  
Lch TAGGTTGCATAGTTTTAGGGCAGGGATTTTGCTCAGAAGGAGGTAACCTATACAACCTGCT [218]  
Dre ----- [221]

Hsa GCCTTTCTTA--CAGAGTGAGGTAGTAGATTGTATAGTT-GTGGGGTAGTGATTTTACCC [348]  
Mmu GCCTTTCTTA--CAGAGTGAGGTAGTAGATTGTATAGTT-GTGGGGTAGTGATTTTACCC [348]  
Mdo GCCTTTCTTA--CAGAGTGAGGTAGTAGATTGTATAGTT-GTGGGGTAGTGATTTTACCC [202]  
Meu GCCTTTCTTA--CAGAGTGAGGTAGTAGATTGTATAGTT-GTGGGGTAGTGATTTTACCC [275]  
Oan GCCTTTCTTA--CAGAGTGAGGTAGTAGATTGTATAGTTT--TAGGGTAGTAATTTTATCC [276]  
Aca GCCTTTCTTA--CAGGTTGAGGTAGTAGATTGTATAGTT-GTAGGGCAGTTATTTTGCCC [349]  
Pbi GCCTTTCTTA--CAGGTTGAGGTAGTAGATTGTATAGTT-GTAGGGCAGTTATTTTGCCC [348]

Cpi GCCTTTCTTA--CGGAGTGAGGTAGTAGATTGTATAGTT-GTAGGGTAGTTATTTTACCC [349]  
Cmy GCCTTTCTTA--TGGAGTGAGGTAGTAGATTGTATAGTT-GTAGGGTAGTTATTTTACCC [349]  
Psi GCCTTTCTTA--CGGAGTGAGGTAGTAGATTGTATAGTT-GTGGGGTAGTTATTTTACCC [349]  
Asp GCCTTTCTTA--CGGAGTGAGGTAGTAGATTGTATAGTT-GTGGGGTAGTTATTTTACCC [349]  
Ami GCCTTTCTTA--CAGAGTGAGGTAGTAGATTGTATAGTT-GTGGGGTAGTTATTTTACCC [348]  
Asi GCCTTTCTTA--CAGAGTGAGGTAGTAGATTGTATAGTT-GTGGGGTAGTTATTTTACCC [348]  
Tgu GCCTTTCTTA--CAGAGTGAGGTAGTAGATTGTATAGTT-GTAGGGTAGTTATTTTACCC [275]  
Cli GCCTTTCTTA--CAGAGTGAGGTAGTAGATTGTATAGTT-GTAGGGTAGTTATTTTACCC [275]  
Gga GCCTTTCTTA--CAGAGTGAGGTAGTAGATTGTATAGTT-GTAGGGTAGTTATTTTACCC [275]  
Xtr ----- [146]  
Lch GCCTTTCTTA--CAGAGTGAGGTAGTAGATTGTATAGTT-GTAGGGTAGTGATTTTACCC [275]  
Dre -----CAGTGTGAGGTAGTAGATTGTATAGTT-GTAGGGTAGTGATTTTATCC [268]

Hsa TGTTTCAGGAGATAACTATAACAATCTATTGCCTTCCCT--TGGGATGAGGTAGTAGGTTGT [406]  
Mmu TGTTTTCAGGAGATAACTATAACAATCTATTGCCTTCCCT--TGGGATGAGGTAGTAGGTTGT [406]  
Mdo TGTTTCAGGAGATAACTATAACAATCTATTGCCTTCCCT--TGGGATGAGGTAGTAGGTTGT [260]  
Meu TGTTTCAGGAGATAACTATAACAATCTATTGCCTTCCCT----- [312]  
Oan TTTTCCGGAGATAACTATAACAATCTATTGCCTTCCCT--TGGGATGAGGTAGTAGGTTGT [334]  
Aca TCTTCAGGAGATAACTATAACAATCTATTGCCTTCCCT--TGGGATGAGGTAGTAGGTTGT [407]  
Pbi TCTTCAGGAGATAACTATAACAATCTATTGCCTTCCCT--TGGGATGAGGTAGTAGGTTGT [406]  
Cpi TGTTTCAGGAGATAACTATAACAATCTATTGCCTTCCCT--TGGGATGAGGTAGTAGGTTGT [407]  
Cmy TGTGCAGGAGATAACTATAACAATCTATTGCCTTCCCT--TGGGATGAGGTAGTAGGTTGT [407]  
Psi TG-TCAGGAGATAACTATAACAATCTATTGCCTTCCCT--TGGGATGAGGTAGTAGGTTGT [406]  
Asp TG-TCAGGAGATAACTATAACAATCTATTGCCTTCCCT--TGGGATGAGGTAGTAGGTTGT [406]  
Ami TGTTTCAGGAGATAACTATAACAATCTATTGCCTTCCCT--TGGGATGAGGTAGTAGGTTGT [406]  
Asi TGTTTCAGGAGATAACTATAACAATCTATTGCCTTCCCT--TGGGATGAGGTAGTAGGTTGT [406]  
Tgu TGTTTCAGGAGATAACTATAACAATCTATTGCCTTCCCT--TGGGATGAGGTAGTAGGTTGT [333]  
Cli TGTTTCAGGAGATAACTATAACAATCTATTGCCTTCCCT--TGGGATGAGGTAGTAGGTTGT [333]  
Gga TGTTTCAGGAGATAACTATAACAATCTATTGCCTTCCCT--TGGGATGAGGTAGTAGGTTGT [333]  
Xtr -----TGGGATGAGGTAGTAGGTTGT [167]  
Lch TGTTTTCAGGAGATAACTATAACAATCTATTGCCTTCCCT--TGGGATGAGGTAGTAGGTTGT [333]  
Dre TGTGTAGAAGATAACTATAACAATCTATTGCCTTCCCT--TGGGATGAGGTAGTAGGTTGT [326]

Hsa ATAGTTTTAGGGTCACACCCACCCTGGGAGATAACTATAACAATCTACTGTCTTTCCCTA- [465]  
Mmu ATAGTTTTAGGGTCACACCCACCCTGGGAGATAACTATAACAATCTACTGTCTTTCCCTA- [465]  
Mdo ATAGTTTTAGGGTCACACCCACCCTGGGAGATAACTATAACAATCTACTGTCTTTCTTA- [319]  
Meu ----- [312]  
Oan ATAGTTTTAGGGTCATACCCACCCTGGGAGATAACTATAACAATCTACTGTCTTTCCCA- [393]  
Aca ATAGTTTTAGGGTCATACCCACCCTGGGAGATAACTATACAGTCTACTGTCTTTCCCTA- [466]  
Pbi ATAGTTTTAGGGTCATACCCACCCTGGGAGATAACTATACAGTCTACTGTCTTTCCCTA- [465]  
Cpi ATAGTTTTAGGGTCATACCCACAACCTGGGAGATAACTATAACAATCTACTGTCTTTCCCTA- [466]  
Cmy ATAGTTTTAGGGTCATACCCACAACCTGGGAGATAACTATAACAATCTACTGTCTTTCCCTA- [466]  
Psi ATAGTTTTAGGGTCATACCCACAACCTGGGAGATAACTATAACAATCTACTGTCTTTCCCTA- [465]  
Asp ATAGTTTTAGGGTCATACCCACAACCTGGGAGATAACTATAACAATCTACTGTCTTTCCCTA- [465]  
Ami ATAGTTTTAGGGTCATACCCACAACCTGGGAGATAACTATAACAATCTACTGTCTTTCCCTA- [465]  
Asi ATAGTTTTAGGGTCATACCCACAACCTGGGAGATAACTATAACAATCTACTGTCTTTCCCTA- [465]  
Tgu ATAGTTTTAGGGTCATACCCACCCTGGGAGATAACTATAACAATCTACTGTCTTTCCCTA- [392]  
Cli ATAGTTTTAGGGTCATACCCGCAACCTGGGAGATAACTATAACAATCTACTGTCTTTCCCTA- [392]  
Gga ATAGTTTTAGGGTCATACCCGCAACCTGGGAGATAACTATAACAATCTACTGTCTTTCCCTA- [392]  
Xtr TTAGTTATTGGGCCGACCCACCAATGGGAGAGAACCTACACAACCTACTGTCTCTCCCTA- [226]  
Lch ATAGTTTTAGGGTCACACCCACAACCTGGGAGATAACTATAACAACCTACTGTCTTTCCCTA- [392]  
Dre ATAGTTTTAGGGTCACACCCACA-CTGGGAGATAACTATAACAACCTACTGTCTTTCTCA- [384]

Hsa -GGTGAGGTAGTAGGTTGTATAGTTTGGGGCT-CTG---CCCTGC-TATGGGATAACTAT [519]  
Mmu -GGTGAGGTAGTAGGTTGTATAGTTTGGGGCT-CTG---CCCCGC-TCTGCGGTAACTAT [519]  
Mdo -GGTGAGGTAGTAGGTTGTATAGTTTGGGGGT-CGCTCCCTCTGTCTGTGAGATAACTAT [377]  
Meu -GGTGAGGTAGTAGGTTGTATAGTTTGGGGGT-CAGTCCCTCTGTCTGTGAGATAACTAT [370]

Oan -GGTGAGGTAGTAGGTTGTATAGTTTGGAGGGCTCCG---CCCTGCCTGTTAGATAACTAT [ 449 ]  
Aca -GGTGAGGTAGTAGGTTGTATAGTTTGGAGGGTCTG---CCCTGCCTGTCACATAACTAT [ 522 ]  
Pbi -GGTGAGGTAGTAGGTTGTATAGTTTGGAGGGTAGA---CCCTGCCTGTCAGATAACTAT [ 521 ]  
Cpi -GGTGAGGTAGTAGGTTGTATAGTTTGGAGGGTATA---CCCTGCCTGTCAGATAACTAT [ 522 ]  
Cmy -GGTGAGGTAGTAGGTTGTATAGTTTGGAGGGTATA---CCCTGCCTGTCAGATAACTAT [ 522 ]  
Psi -GGTGAGGTAGTAGGTTGTATAGTTTGGAGGGTATC---CCCTGCCTGTCAGATAACTAT [ 521 ]  
Asp -GGTGAGGTAGTAGGTTGTATAGTTTGGAGGGTATC---CCCTGCCTGTCAGATAACTAT [ 521 ]  
Ami -GGTGAGGTAGTAGGTTGTATAGTTTGGAGGGTATA---CCCTGCCTGTCAGATAACTAT [ 521 ]  
Asi -GGTGAGGTAGTAGGTTGTATAGTTTGGAGGGTATA---CCCTGCCTGTCAGATAACTAT [ 521 ]  
Tgu -GGTGAGGTAGTAGGTTGTATAGTTTGGAGGGCTATG---CCCTGCCTGTCAGATAACTAT [ 448 ]  
Cli -GGTGAGGTAGTAGGTTGTATAGTTTGGAGGGCTCTG---CCCTGCCTGTCACATAACTAT [ 448 ]  
Gga -GGTGAGGTAGTAGGTTGTATAGTTTGGAGGGTATG---CCCTGCCTGTCAGATAACTAT [ 448 ]  
Xtr -GGTGAGGTAGTAGGTTGTTTGTAGTTGT-GGGTTGCA---CCCTGACGTTTGGATAACTAT [ 281 ]  
Lch -GGTGAGGTAGTAGGTTGTATAGTTTGGAGGGTATA---CCCTTGCTGTCAGATAACTAT [ 448 ]  
Dre -GGTGAGGTAGTAGGTTGTATAGTTTGGAGGGTTTAA---CCCTTGCTGTCAGATAACTAT [ 440 ]

Hsa ACAATCTACTGTCTTTCC--GGGGTGAGGTAGTAGGTTGTGTGGTTTTCAGGGCAGTGATG [ 577 ]  
Mmu ACAATCTACTGTCTTTCC--AGGGTGAGGTAGTAGGTTGTGTGGTTTTCAGGGCAGTGATG [ 577 ]  
Mdo ACAGTCTACTGTCTTTCC--GGGGTGAGGTAGTAGGTTGTGTGGTTTTCAGGGTAGTGATT [ 435 ]  
Meu ACAGTCTACTGTCTTTCC--GGGGTGAGGTAGTAGGTTGTGTGGTTTTCAGGGTAGTGATT [ 428 ]  
Oan ACAATCTACTGTCTTTCC--GGGATGAGGTAGTAGGTTGTGTGGTTTTCAGGGGAGTGATT [ 507 ]  
Aca ACAATCTACTGTCTTTCC--AAGGTGAGGTAGTAGGTTGTGTGGTTTTCAGGGTAGTCATT [ 580 ]  
Pbi ACAATCTACTGTCTTTCC--GGGGTGAGGTAGTAGGTTGTGTGGTTTTCAGGGTAGTAATT [ 579 ]  
Cpi ACAATCTACTGTCTTTCC--AGGGTGAGGTAGTAGGTTGTGTGGTTTTCAGGGTAGTGATT [ 580 ]  
Cmy ACAATCTACTGTCTTTCC--AGGGTGAGGTAGTAGGTTGTGTGGTTTTCAGGGTAGTGATT [ 580 ]  
Psi ACAATCTACTGTCTTTCC--AGGGTGAGGTAGTAGGTTGTGTGGTTTTCAGGGTAGTGATT [ 579 ]  
Asp ACAATCTACTGTCTTTCC--AGGGTGAGGTAGTAGGTTGTGTGGTTTTCAGGGTAGTGATT [ 579 ]  
Ami ACAATCTACTGTCTTTCC--AGGATGAGGTAGTAGGTTGTGTGGTTTTCAGGGTAGTGATT [ 579 ]  
Asi ACAATCTACTGTCTTTCC--AGGGTGAGGTAGTAGGTTGTGTGGTTTTCAGGGTAGTGATT [ 579 ]  
Tgu ACAATCTACTGTCTTTCC--AGGATGAGGTAGTAGGTTGTGTGGTTTTCAGGGTAGTGATT [ 506 ]  
Cli ACAATCTACTGTCTTTCC--AGGATGAGGTAGTAGGTTGTGTGGTTTTCAGGGTAGTGATT [ 506 ]  
Gga ACAATCTACTGTCTTTCC--AGGATGAGGTAGTAGGTTGTGTGGTTTTCAGGGTAGTGATT [ 506 ]  
Xtr ACAATCTACTGTCTTTCC--TGGCTGAGGTAGTAGTTTGTGTAGTTAGGGGGCAGTGTTG [ 339 ]  
Lch ACAATCTACTGTCTTTCC--AGTGTGAGGTAGTAGGTTGTGTGGTTTTCAGGGTAGTGATT [ 506 ]  
Dre ACAACTTACTGTCTTTCC--AGGGTGAGGTAGTAGGTTGTGTGGTTTTCAGGGTTGTG-TT [ 497 ]

Hsa TT-GCCCC--TCGGAAGATAACTATAACAACCTACTGCCTTTCCC--GGGTGAGGTAGTAAG [ 632 ]  
Mmu TT-GCCCC--TCCGAAGATAACTATAACAACCTACTGCCTTTCCC--GGGTGAGGTAGTAAG [ 632 ]  
Mdo TT-GCCCCAATCAGAAGATAACTATAACAACCTACTGCCTTTCCC----- [ 477 ]  
Meu TT-GCCCCAATCAGAAGATAACTATAACAACCTACTGCCTTTCCCT----- [ 470 ]  
Oan TT-GCCCCAATCAGAAGATAACTATACAGCCTACTGCCTTTCCC--GGATGAGGTAGTAAG [ 564 ]  
Aca TT-GCCCCAATCAGGAGATAACTATAACAACCTACTGCCTTTCCCT--GGGTGAGGTAGTAAG [ 637 ]  
Pbi TT-GCCCCAATCAGGAGATAACTATAACAACCTACTGCCTTTCCCT--GGGTGAGGTAGTAAG [ 636 ]  
Cpi TT-GCCCCAATCAGGAGATAACTATAACAACCTACTGCCTTTCCC--GGATGAGGTAGTACG [ 637 ]  
Cmy TT-GCCCCAATCAGGAGATAACTATAACAACCTACTGCCTTTCCC--GGATGAGGTAGTACG [ 637 ]  
Psi TT-GCCCCAATCAGGAGATAACTATAACAACCTACTGCCTTTCCC----- [ 621 ]  
Asp TT-GCCCCAATCAGGAGATAACTATAACAACCTACTGCCTTTCCC----- [ 621 ]  
Ami TT-GCCCCAATCAGGAGATAACTATAACAACCTACTGCCTTTCCC--GGGTGAGGTAGTAAG [ 636 ]  
Asi TT-GCCCCAATCAGGAGATAACTATAACAACCTACTGCCTTTCCC--GGGTGAGGTAGTAAG [ 636 ]  
Tgu TT-GCCCCAATCAGGAGATAACTATAACAACCTACTGCCTTTCCC----- [ 548 ]  
Cli TT-GCCCCAGTCAGGAGATAACTATAACAACCTACTGCCTTTCCC----- [ 548 ]  
Gga TT-GCCCCAATCAGGAGATAACTATAACAACCTACTGCCTTTCCC----- [ 548 ]  
Xtr TTTTGCCC----ATGGAGATAACTAGACAAACTACTGCCTTTGCC--GGATGAGGTAGTAAG [ 393 ]  
Lch TTTTGCCCC-ATTGGGAGATAACTATAACAACCTACTGCCTTTCCC----- [ 548 ]  
Dre TTTTGCCCC-ATCAGGAGTTAACTATAACAACCTACTGCCTTTCCC--TGGTGAGGTAGTAAG [ 554 ]

Hsa TTGTATTGTTGTGGGGTAGGGATAT-TA-GGCCCAATT-AGAAGATAACTATAACAACCTT [ 689 ]



Mmu TTGTATTGTTGTGGGGTAGGGATTT-TA-GGCCCCAGTA-AGAAGATAACTATAACAACCTT [ 689 ]  
Mdo ----- [ 477 ]  
Meu ----- [ 470 ]  
Oan TTGTATTGTTGTGGGGTAGGGATTTCTTTTGCCCCAATT--AGCGATAACTATAACAATTT [ 622 ]  
Aca TTGTATTGTTGTGGGGTAGGGAT---TTGTGCCCCAAAT-CAGAGATAACTATAACAACCTT [ 693 ]  
Pbi TTGTATTGTTGTGGGGTAGGGAT---TTGTGCCCCAAAT-CAGAGATAACTATAACAACCTT [ 692 ]  
Cpi TTGTATTGTTGTGGGGTCGGGAT---TCGTGCCCCAA-T-CAGAGATAACAATATAACAACCTT [ 692 ]  
Cmy TTGTATTGTTGTGGGGTCAGGAT---TCATGCCCCAA-T-CAGAGATAACGATAACAACCTT [ 692 ]  
Psi ----- [ 621 ]  
Asp ----- [ 621 ]  
Ami TTGTATCGTTGGGGGGTCGGGAT---TGGAGCCCCGGTG-TCGAGGTAACTATAACAACCTT [ 692 ]  
Asi TTGTATCGTTGTGGGGTCGGGAT---TGGAGCCCCGGTG-TCGAGGTAACTATAACAACCTT [ 692 ]  
Tgu ----- [ 548 ]  
Cli ----- [ 548 ]  
Gga ----- [ 548 ]  
Xtr TTGTATTGTTGTGGGGGTTTTTA-----TTTCCCCAAATTAGGAGATAACTATAACAGCTT [ 448 ]  
Lch ----- [ 548 ]  
Dre TTGTGTTGTTGTGGGGATCAGTATAGTATGGCCCTTGA-AGGAGATAACTATAACAATTT [ 613 ]  
  
Hsa ACTACTTTCC--TGGGATGAGGTAGTAGATTGTATAGTTTTAGGGTCATACCCCATCTTG [ 747 ]  
Mmu ACTACTTTCC--TGGGATGAGGTAGTAGATTGTATAGTTTTAGGGTCATACCCCATCTTG [ 747 ]  
Mdo -----CGGGATGAGGTAGTAGATTGTATAGTTTTAGGGTCACACCCGATCTCG [ 525 ]  
Meu -----CGGGATGAGGTAGTAGATTGTATAGTTTTAGGGTCACACCCGATCTTG [ 518 ]  
Oan ACTACTTTCC--TGGGATGAGGTAGTAGATTGTATAGTTTTAGGGTCATACCCGATCTTG [ 680 ]  
Aca ACTACTTTCC--TGGGATGAGGTAGTAGATTGTATAGTTTTAGGGTCATACCCGGTCTTG [ 751 ]  
Pbi ACTACTTTCC--TGGGATGAGGTAGTAGATTGTATAGTTTTAGGGTCATACCCGGTCTTG [ 750 ]  
Cpi ACTACTTTCC--GGGGATGAGGTAGTAGATTGTATAGTTTTAGGGTCACACCCGGTCTCG [ 750 ]  
Cmy ACTACTTTCC--GGGGATGAGGTAGTAGATTGTATAGTTTTAGGGTCACACCCGGTCTCG [ 750 ]  
Psi ----- [ 621 ]  
Asp ----- [ 621 ]  
Ami ACTACTTTCC--TGGGCTGAGGTAGTAGATTGTATAGTTCT--GGGTCACACCCG--CGCG [ 747 ]  
Asi ACTACTTTCC--TGGGCTGAGGTAGTAGATTGTATAGTTCT--GGGTCACACCCG--CGCG [ 747 ]  
Tgu ----- [ 548 ]  
Cli ----- [ 548 ]  
Gga ----- [ 548 ]  
Xtr ACTGCCTTCC--CAGGATGAGGTAGTAGATTGTATAGTTTTGGGGTCACACCCGATCTGG [ 506 ]  
Lch -----CGGGTTGAGGTAGTAGATTGTATAGTTTTAGGGTCACACCCGATCTTG [ 596 ]  
Dre ACTGCCTTCC--TGGGATGAGGTAGTAGTTTTGTATAGTTTTAGGATCACACCAGATCTGG [ 671 ]  
  
Hsa GAGATAACTATAACAGTCTACTGTCTTTCCCA--GGCTGAGGTAGTAGTTTGTACAGTTT- [ 804 ]  
Mmu GAGATAACTATAACAGTCTACTGTCTTTCCCA--GGCTGAGGTAGTAGTTTGTACAGTTT- [ 804 ]  
Mdo GAGATAACTATAACAGTCTACTGTCTTTCCCA--GGCTGAGGTAGTAGTTTGTACAGTTT- [ 582 ]  
Meu GAGATAACTATAACAGTCTACTGTCTTTCTCA----- [ 549 ]  
Oan GAGATAACTATAACAGTCTACTGTCTTTCCCA--GGCTGAGGTAGTAGTTTGTACAGTTT- [ 737 ]  
Aca GAGATAACTATAACAATCTACTGTCTTTCCCTA--GGTTGAGGTAGTAGTTTGTACAGTTT- [ 808 ]  
Pbi GAGATAACTATAACAATCTACTGTCTTTCCCTA--GGCTGAGGTAGTAGTTTGTACAGTTT- [ 807 ]  
Cpi GAGATAACTATAACAGTCTACTGTCTTTCCCG--GGCTGAGGTAGTAGTTTGTACAGTTT- [ 807 ]  
Cmy GAGATAACTATAACAGTCTACTGTCTTTCCCG--GGCTGAGGTAGTAGTTTGTACAGTTT- [ 807 ]  
Psi -----GGCTGAGGTAGTAGTTTGTACAGTTT- [ 647 ]  
Asp -----GGCTGAGGTAGTAGTTTGTACAGTTT- [ 647 ]  
Ami GAGATAACTATAACAGCCTACTGTCTTTCCCTG--AGCTGAGGTAGTAGTTTGTACAGTTT- [ 804 ]  
Asi GAGATAACTATAACAGCCTACTGTCTTTCCCTG--AGCTGAGGTAGTAGTTTGTACAGTTT- [ 804 ]  
Tgu -----GGCTGAGGTAGTAGTTTGTACAGTTT- [ 574 ]  
Cli -----GGCTGAGGTAGTAGTTTGTACAGTTT- [ 574 ]  
Gga -----GGCTGAGGTAGTAGTTTGTACAGTTT- [ 574 ]  
Xtr GAGATAACTATAACAGTTTACTGTCTTTCCCTG--GGCTGAGGTAGTTGTTTGTACAGTTT- [ 563 ]  
Lch GAGATAACTATAACAGTCTACTGTCTTTCCCTG--GGCTGAGGTAGTAGTTTGTACAGTTT- [ 653 ]

Dre GAGATAACTATACAGTCTACTGTCTTTCCCA--GGTTGAGGTAGTTGTTTGTACAGTTTT [ 729 ]

Hsa GAGGGTCTATGATAACCACCCGGTACAGGAGAT-AACTGTACAGGCCACTGCCTTGCCAG- [ 862 ]  
Mmu GAGGGTCTATGATAACCACCCGGTACAGGAGAT-AACTGTACAGGCCACTGCCTTGCCAG- [ 862 ]  
Mdo GAGGGTCTATGATAACCACCCGGTACAGGAGAT-AACTGTACAGGCCACTGCCTTGCCAG- [ 640 ]  
Meu ----- [ 549 ]  
Oan CAGGGTCTACAATACCACCCGGTATAGGAGAT-AACTGTACAGGCCACTGCCTTGCCAG- [ 795 ]  
Aca GAGGGTCTATGATAACCACCCGGTACAGGAGAT-AACTGTACAGGCCACTGCCTTGCCAG- [ 866 ]  
Pbi GAGGGTCTACGATAACCGCCGGTACAGGAGAT-AACTGTACAGGCCACTGCCTTGCCAG- [ 865 ]  
Cpi GAGGGTCTATGATAACCACCCGGTACAGGAGAT-AACTGTACAGGCCACTGCCTTGCCAG- [ 865 ]  
Cmy GAGGGTCTATGATAACCACCCGGTACAGGAGAT-AACTGTACAGGCCACTGCCTTGCCAG- [ 865 ]  
Psi GAGGGTCTATGATAACCACCCGGTATAGGAGAT-AACTGTACAGGCCACTGCCTTGCCAG- [ 705 ]  
Asp GAGGGTCTATGATAACCACCCGGTATAGGAGAT-AACTGTACAGGCCACTGCCTTGCCAG- [ 705 ]  
Ami GAGGGTCTATGATAACCACCCGGTACAGGAGAT-AACTGTACAGGCCACTGCCTTGCCAG- [ 863 ]  
Asi GAGGGTCTATGATAACCACCCGGTACAGGAGAT-AACTGTACAGGCCACTGCCTTGCCAG- [ 863 ]  
Tgu GAGGGTCTATGATAACCACCCGGTACAGGAGAT-AACTGTACAGGCCACTGCCTTGCCAG- [ 632 ]  
Cli GAGGGTCTATGATAACCACCCGGTACAGGAGAT-AACTGTACAGGCCACTGCCTTGCCAG- [ 632 ]  
Gga GAGGGTCTATGATAACCACCCGGTACAGGAGAT-AACTGTACAGGCCACTGCCTTGCCAG- [ 632 ]  
Xtr AAGGGTCTGTGACACCACCTCTGTTGGAGAT-AACTGTACAGGCCACTGCCTTGCCAG- [ 621 ]  
Lch GAGGGTTTGTGATAACCACCCGGTAATGGAGAT-AACTGTACAAGCCACTGCCTTGCCAG- [ 711 ]  
Dre TAGGGTCTGTTATTCTGCCCTGTTAAGGAGCT-AACTGTACAGACTACTGCCTTGCCAG- [ 787 ]

Hsa -CTGGCTGAGGTAGTAGTTTGTGCTGTTGGTCGGGTGTGACATTGCCCGCTGTGGAGAT [ 921 ]  
Mmu -CTGGCTGAGGTAGTAGTTTGTGCTGTTGGTCGGGTGTGACATTGCCCGCTGTGGAGAT [ 921 ]  
Mdo -CTGGCTGAGGTAGTAGTTTGTGCTGTTGGTCGGGTGTGACATTGCCCGCTGTGGAGAT [ 699 ]  
Meu -CTGGCTGAGGTAGTAGTTTGTGCTGTTGGTCGGGTGTGACATTGCCCGCTGTGGAGAT [ 608 ]  
Oan ----- [ 795 ]  
Aca -CTGGCTGAGGTAGTAGTTTGTGCTGTTGGTCGGGTGTGACATTGCCCGCTGTGGAGAT [ 925 ]  
Pbi -CTGGCTGAGGTAGTAGTTTGTGCTGTTGGTCGGGTGTGACATTGCCCGCTGTGGAGAT [ 924 ]  
Cpi -CTGGCTGAGGTAGTAGTTTGTGCTGTTGGTCGGGTGTGACATTGCCCGCTGTGGAGAT [ 924 ]  
Cmy -CTGGCTGAGGTAGTAGTTTGTGCTGTTGGTCGGGTGTGACATTGCCCGCTGTGGAGAT [ 924 ]  
Psi -CTGGCTGAGGTAGTAGTTTGTGCTGTTGGTCGGGTGTGACATTGCCCGCTGTGGAGAT [ 764 ]  
Asp -CTGGCTGAGGTAGTAGTTTGTGCTGTTGGTCGGGTGTGACATTGCCCGCTGTGGAGAT [ 764 ]  
Ami -CTGGCTGAGGTAGTAGTTTGTGCTGTTGGTCGGGTGTGACATTGCCCGCTGTGGAGAT [ 922 ]  
Asi ----- [ 863 ]  
Tgu -CTGGCTGAGGTAGTAGTTTGTGCTGTTGGTCGGGTGTGACATTGCCCGCTGTGGAGAT [ 691 ]  
Cli -CTGGCTGAGGTAGTAGTTTGTGCTGTTGGTCGGGTGTGACATTGCCCGCTGTGGAGAT [ 691 ]  
Gga -CTGGCTGAGGTAGTAGTTTGTGCTGTTGGTCGGGTGTGACATTGCCCGCTGTGGAGAT [ 691 ]  
Xtr -CTGGCTGAGGTAGTAGTTTGTGCTGTTGGTCGGGTGTGACATTGCCCGCTGTGGAGAT [ 680 ]  
Lch -CTGGCTGAGGTAGTAGTTTGTGCTGTTGGTAGGGTGTGACATTGCCCGCTATGGAGAT [ 770 ]  
Dre -CTGGCTGAGGTAGTAGTTTGTGCTGTTGGTTGGGATGTGACATTGCCCGTTATGGAGAT [ 846 ]

Hsa AACTGCGCAAGCTACTGCCTTGCT----- [ 945 ]  
Mmu AACTGCGCAAGCTACTGCCTTGCT----- [ 945 ]  
Mdo AACTGCGCAAGCTACTGCCTTGCT----- [ 723 ]  
Meu AACTGCGCAAGCTACTGCCTTGCT----- [ 632 ]  
Oan ----- [ 795 ]  
Aca AACTGCGCAAGCTACTGCCTTGCT--GTGAGGTAGTAGGTTGTATAGTTTG-TGGGAGGG [ 982 ]  
Pbi AACTGCGCAAGCTACTGCCTTGCT--GTGAGGTAGTAGGTTGTATAGTTTG-TGGGAGGG [ 981 ]  
Cpi AACTGCGCAAGCTACTGCCTTGCT--GTGAGGTAGTAGGTTGTATAGTTTGGTGGGAGGG [ 982 ]  
Cmy AACTGCGCAAGCTACTGCCTTGCT--GTGAGGTAGTAGGTTGTATAGTTTGGTGGGAGGG [ 982 ]  
Psi AACTGCGCAAGCTACTGCCTTGCT--GTGAGGTAGTAGGTTGTATAGTTTGGTGGGAGGG [ 822 ]  
Asp AACTGCGCAAGCTACTGCCTTGCT--GTGAGGTAGTAGGTTGTATAGTTTGGTGGGAGGG [ 822 ]  
Ami AACTGCGCAAGCTACTGCCTTGCT--GTGAGGTAGTAGGTTGTATAGTTTGGTGGGAGGG [ 980 ]  
Asi -----GTGAGGTAGTAGGTTGTATAGTTTGGTGGGAGGG [ 897 ]  
Tgu AACTGCGCAAGCTACTGCCTTGCT--GTGAGGTAGTAGGTTGTATAGTTTGGTGGGAGGG [ 749 ]  
Cli AACTGCGCAAGCTACTGCCTTGCT--GTGAGGTAGTAGGTTGTATAGTTTGGTGGGAGGG [ 749 ]

Gga AACTGCGCAAGCTACTGCCTTGCT--GTGAGGTAGTAGGTTGTATAGTTTGGTGGGAGGG [749]  
Xtr AACTGCGCAAGCTACTGCCTTGCT----- [704]  
Lch AACTGCGCAAGCTACTGCCTTGCT--GTGAGGTAGTAGGTTGTATAGTTTGTAGTGGACAGG [828]  
Dre GACTGCGCAAGCTACTCCCTTGCC--GTGAGGTAGTAGGTTGTATAGTTTGGTGGGAGGG [904]

Hsa ----- [945]  
Mmu ----- [945]  
Mdo ----- [723]  
Meu ----- [632]  
Oan -----GGCTGAGGTA [805]  
Aca ATTACATCCCATTTTCAGGTGATAAATAACAGTCTATTGCCTTCCTTA--GGCTGAGGTA [1040]  
Pbi ATTATATCCCATTTTCAGGTGATAAATAACAGTCTATTGCCTTCCTTA--GGCTGAGGTA [1039]  
Cpi ATTTTCATCCCATTTTCAGGTGATAAATAACAGTCTATTGCCTTCCTTA--GGCTGAGGTA [1040]  
Cmy ATTTTCATCCCATTTTCAGGTGATAAATAACAGTCTATTGCCTTCCTTA--GGCTGAGGTA [1040]  
Psi ATTTTCATCCCATTTTCAGGTGATAAATAACAGTCTATTGCCTTCCTTA--GGCTGAGGTA [880]  
Asp AATTCATCCCATTTTCAGGTGATAAATAACAGTCTATTGCCTTCCTTA--GGCTGAGGTA [880]  
Ami ATTTTCATCCCATTTTCAGGTGATAAATAACAGTCTATTGCCTTCCTTG--GGCTGAGGTA [1038]  
Asi ATTTTCATCCCATTTTCAGGTGATAAATAACAGTCTATTGCCTTCCTTG--GGCTGAGGTA [955]  
Tgu ATTTGATCCCATTTTCAGGTGATAAATAACAGTCTATTGCCTTCCTTA--GGCTGAGGTA [807]  
Cli ATTTGATCCCATTTTCAGGTGATAAATAACAGTCTATTGCCTTCCTTA--GGCTGAGGTA [807]  
Gga ATTCTGTCCCATTTTCAGGTGATAAATAACAGTCTATTGCCTTCCTTA--GGCTGAGGTA [807]  
Xtr ----- [704]  
Lch GTTTCGTTTCAGTTCAGATGATAAATAACAGTCTATTGCCTTCCTTA--GGCTGAGGTA [886]  
Dre ATCAAACCCTGTT-CAGCTGATAAATAACAGTCTATTGCCTTCCTTG--GGCTGAGGTA [961]

Hsa ----- [945]  
Mmu ----- [945]  
Mdo ----- [723]  
Meu ----- [632]  
Oan GTAGATTGAATAGTTGTGGGGTCACG--GCCTCCCTGTGTGCTAACTATAACAATCTACTG [863]  
Aca GTAGATTGAATAGTTGTGGAGCCTTA--TTCTCCCTCTGAGCTAACTATAACAATCTACTG [1098]  
Pbi GTAGATTGAATAGTTGTGGAGCCATC--TTCTCCCTTTGAGCTAACTATAACAATCTACTG [1097]  
Cpi GTAGATTGAATAGTTGTGGAGTCCTA--CCCTCCCTTTGAGCTAACTATAACAATCTACTG [1098]  
Cmy GTAGATTGAATAGTTGTGGAGTCCTA--CCCTCCCTTTGAGCTAACTATAACAATCTACTG [1098]  
Psi GTAGATTGAATAGTTGTGGAGTCCTA--CTCTCCCTCTGAGCTAACTATAACAATCTACTG [938]  
Asp GTAGATTGAATAGTTGTGGAGTCCTA--CCCTCCCTCTGAGCTAACTATAACAATCTACTG [938]  
Ami GTAGATTGAATAGTTGTGGAGTCCTA--CCCTCCCTTTGAGCTAACTATAACAATCTACTG [1096]  
Asi GTAGATTGAATAGTTGTGGAGTCCTA--CCCTCCCTTTGAGCTAACTATAACAATCTACTG [1013]  
Tgu GTAGATTGAATAGTTGTGGAGTCTGG--TCCTCCCTCTGAGCTAACTATAACAATCTACTG [865]  
Cli GTAGATTGAATAGTTGTGGAGTCCGA--TCCTCCCTTTGAGCAAACCTATAACAATCTACTG [865]  
Gga GTAGATTGAATAGTTGTGGAGTCCTA--TCCTCCCTTTGAGCTAACTATAACAATCTACTG [865]  
Xtr ----- [704]  
Lch GTAGATTGAATAGTTGTGGAGGCTCCT-GCTCTCCCTTTGAGATAAATAACAATCTACTG [945]  
Dre GTAGATTGAATAGTTGTGGAGCCCTGCGCTCTCTCTGAGATAAATAACAATCTACTG [1021]

Hsa -----CTGCTTTGGGAAACATACTTCTTTTATATGCCCATATGGACCTGCTAA-GCTA [995]  
Mmu -----CTGCTTTGGACACATACTTCTTTTATATGCCCATATGAACCTGCTAA-GCTA [995]  
Mdo -----CTGCTTTGAGAAACATACTACTTTTATATGCCCATATGAACCTGCTAA-GCTA [773]  
Meu ----- [632]  
Oan TCTTTCC--CTGCTTTGAGGAACATACTTCTTTTATATCCCCATATGAACCTGGCAA-GCTA [920]  
Aca TCTTTCC--CTGCTTTGAGTGACATACTTCTTTTATATGCCCATATGAACCTGGCAA-ACTA [1155]  
Pbi TCTTTCC--CTGCTTTGAGTGACATACTTCTTTTATATGCCCATATGAACCTGGCAA-ACTA [1154]  
Cpi TCTTTCC--CTGCTTTGAGAGACATACTTCTTTTATATGCCCATATGAACCTGGCAA-GCTA [1155]  
Cmy TCTTTCC--CTGCTTTGAGAGACATACTTCTTTTATATGCCCATATGAACCTGGCAA-GCTA [1155]  
Psi TCTTTCC--CTGCTTTGAGAAACATACTTCTTTTATATGCCCATATGAACCTGGCAA-GCTA [995]  
Asp TCTTTCC--CTGCTTTGAGAAACATACTTCTTTTATATGCCCATATGAACCTGGCAA-GCTA [995]  
Ami TCTTTCC--CTGCTTTGAGAGACATACTTCTTTTATATGCCCATATGAACCTGGCAA-GCTA [1153]

Asi TCTTTCC--CTGCTTGAGAGACATACTTCTTTATATGCCCATATGAACCTGGCAA-GCTA [1070]  
Tgu TCTTTCC--CTGCTTGAGAGACATACTTCTTTATATGCCCATATGAACCTGGCAA-GCTA [922]  
Cli TCTTTCC--CTGCTTGAGAGACATACTTCTTTATATGCCCATATGAACCTGGGAA-GCTA [922]  
Gga TCTTTCC--CTGCTTGAGAGACATACTTCTTTATATGCCCATATGAACCTGGCAA-TCTA [922]  
Xtr -----CTATTTGGGAGACATACTTCTTTATATGTCCCATATGGAAGTGCCAATGCTA [755]  
Lch TCTTTCC--CTGCTTGAGGGACATACTTCTTTATATACCCCATATGAACCTGTCTA-GCTA [1002]  
Dre TCTTTCC--CCGCTTGGTAGACATACTTCTTTATATGCCCATATGAACAAGAGCA-GCTA [1078]

Hsa TGGAATGTAAAGAAGTATGTATCTCAGGCCG--ACCTACTCAGAGTACATACTTCTTTAT [1053]  
Mmu TGGAATGTAAAGAAGTATGTATTTTCAGGCTA--GCCTACTCAGAGCACATACTTCTTTAT [1053]  
Mdo TGGAATGTAAAGAAGTATGTATTTCCGGTAG--ACCTACTCAGAGTACATACTTCTTTAT [831]  
Meu -----ACCTGCTCAGAGTACATACTTCTTTAT [659]  
Oan TGGAATGTAAAGAAGTATGTATTTTCAGGTGG--ACCTGCTCAGAGTACATACTTCTTTAT [978]  
Aca TGGAATGTAAAGAAGTATGTATTTTCAGGTAT--ACCTGTTGAGAGCACATACTTCTTTAT [1213]  
Pbi TGGAATGTAAAGAAGTATGTATTTTCAGGCAT--ACCTGCCCAGAGCACATACTTCTTTAT [1212]  
Cpi TGGAATGTAAAGAAGTATGTATTTTCAGGTGG--TCCTGCCCAGAGTACATACTTCTTTAT [1213]  
Cmy TGGAATGTAAAGAAGTATGTATTTTCAGGTGG--TCCTGCCCAGAGTACATACTTCTTTAT [1213]  
Psi TGGAATGTAAAGAAGTATGTATTTTCAGGTGG--TCCTGCCCAGATTACATACTTCTTTAT [1053]  
Asp TGGAATGTAAAGAAGTATGTATTTTCAGGTGG--TCCTGCCCAGATTACATACTTCTTTAT [1053]  
Ami TGGAATGTAAAGAAGTATGTATTTTCAGGTGG--ACCTGCCCAGAGTACATACTTCTTTAT [1211]  
Asi TGGAATGTAAAGAAGTATGTATTTTCAGGTGG--ACCTGCCCAGAGTACATACTTCTTTAT [1128]  
Tgu TGGAATGTAAAGAAGTATGTATTTTCAGGTGG--ACCTGCTCAGAGCACATACTTCTTTAT [980]  
Cli TGGAATGTAAAGAAGTATGTATTTTCAGGTGG--ACCTGCCCAGAGTACATACTTCTTTAT [980]  
Gga TGGAATGTAAAGAAGTATGTATTTTCAGGTGG--ACCTGCTCAGAGCACATACTTCTTTAT [980]  
Xtr TGGAATGTAAAGAAGTATGTATCTCCGATAG--ACCTGTTTGGAGTACATACTTCTTTAT [813]  
Lch TGGAATGTAAAGAAGTATGTATTTTCAGGTAG--ACCTGCCCAGAACACATACTTCTTTAT [1060]  
Dre TGGAATGTAAAGAAGTATGTATCCCAGGTGA--GCCTACTTGGTGTACATACTTCTTTAT [1136]

Hsa GTACCCATATGAACATACAA-TGCTATGGAATGTAAAGAAGTATGTATTTTTGGTAG--G [1110]  
Mmu GTACCCATATGAACATTCAG-TGCTATGGAATGTAAAGAAGTATGTATTTTTGGGTAG--G [1110]  
Mdo GTACCCATATGAACATACAA-TGCTATGGAATGTAAAGAAGTATGTATTTTTGGTAG--G [888]  
Meu GTACCCATATGAACATACAA-TGCTATGGAATGTAAAGAAGTATGTATTTTTGGTAG--- [715]  
Oan GTACCCATATGAACATAAAA-AGCTATGGAATGTAAAGAAGTATGTATTTTTGGCAG--G [1035]  
Aca GTACCCATATGAAGATACAA-TGTTATGGAATGTAAAGAAGTATGTATTTTTGATAG--T [1270]  
Pbi GTACCCATATGAAGATATAA-TGTTATGGAATGTAAAGAAGTATGTACTTTTTGGCAG--T [1269]  
Cpi GTACCCATATGAACATATAA-TGCTATGGAATGTAAAGAAGTATGTATTTTTGGCAG--C [1270]  
Cmy GTACCCATATGAACATACAA-TGCTATGGAATGTAAAGAAGTATGTATTTTTGGCAG--C [1270]  
Psi GTACCCATATGAACATACAA-TGCTATGGAATGTAAAGAAGTATGTATTTTTGGCAG--C [1110]  
Asp GTACCCATATGAACATACAA-TGCTATGGAATGTAAAGAAGTATGTATTTTTGGCAG--C [1110]  
Ami GTACCCATATGAACATACAA-TGCTATGGAATGTAAAGAAGTATGTATTTTTGGCAG--C [1268]  
Asi GTACCCATATGAACATACAA-TGCTATGGAATGTAAAGAAGTATGTATTTTTGGCAG--C [1185]  
Tgu GTACCCATATGAACATACAA-TGCTATGGAATGTAAAGAAGTATGTATTTTTGGCAG--C [1037]  
Cli GTACCCATATGAACATACAA-TGCTATGGAATGTAAAGAAGTATGTATTTTTGGCAG--C [1037]  
Gga GTACCCATATGAACATACAA-TGCTATGGAATGTAAAGAAGTATGTATTTTTGGCAG--C [1037]  
Xtr GTACCCATATGAACATACAA-TGCTATGGAATGTAAAGAAGTATGTATTTTTATCAG--C [870]  
Lch GTACCCATATGAACATATGA-TGCTATGGAATGTAAAGAAGTATGTATTTTTGGTGG--C [1117]  
Dre GTGCCCATATGAACATATAAAAAGCTATGGAATGTAAAGAAGTATGTATTCTTGGTCA--G [1194]

Hsa CTTCCCGAGGCCACATGCTTCTTTATATCCCCATATGGATTACTTTGCTATGGAATGTAA [1170]  
Mmu CTTCCCCAGGCCACATGCTTCTTTATATCCTCATAGATATCTCAGCACTATGGAATGTAA [1170]  
Mdo CTTTCTGAGGCAACATGCTTCTTTATATCCCCATATGAATTATGCTGCTATGGAATGTAA [948]  
Meu ----- [715]  
Oan CTCTCCGAGACAACATGCTTCTTTATATCCCCATATGGATTACGCTGCTATGGAATGTAA [1095]  
Aca CTTTTTGAGATTACATGCTTCTTTATATCTCCATATGAATTGCCTTGCTATGGAATGTAA [1330]  
Pbi CTTTTTGAGGGGACACGCTTCTTTATAATCCCATATGAATTACATTGCTATGGAATGTAA [1329]  
Cpi TCTTTTGAGACAACATGCTTCTTTATATCCCCATATGAATTATGCTGCTATGGAATGTAA [1330]  
Cmy TCTTTTGAGACAACATGCTTCTTTATATCCCCATATGAATTACGCTGCTATGGAATGTAA [1330]

```
Psi TCTTTTGAGACAACATGCTTCTTTTATATCCCCATATGAATTACGCTGCTATGGAATGTAA [1170]
Asp TCTTTTGAGACAACATGCTTCTTTTATATCCCCATATGAATTACGCTGCTATGGAATGTAA [1170]
Ami TCTTTTGAGGCAACATGCTTCTTTTATATCCCCATAGGGATAACAGTGCTATGGAATGTAA [1328]
Asi TCTTTTGAGGCAACATGCTTCTTTTATATCCCCATAGGGATAACAGTACTATGGAATGTAA [1245]
Tgu TCTTATGAGATGACATGCTTCTTTTATATCCCCATATGGATTAGGCTGCTATGGAATGTAA [1097]
Cli TCTTATGAGATTACATGCTTCTTTTATATCCCCATAGGGATTAGGCTGCTATGGAATGTAA [1097]
Gga TCTTATGAGATGACATGCTTCTTTTATATCCCCATATGGATTAGGCTGCTATGGAATGTAA [1097]
Xtr TCACGGGAGGTCACATGCTTCTTTTATATACCCATATGAACTACATTGTTATGGAATGTAA [930]
Lch TTGCTG-AGATGACATGCTTCTTTTATATCCTCATATGGGTTTCACAGCTATGGAATGTAA [1176]
Dre CCTCTTGTGAAGACATGCTTCTTTTATATGCCCATATTAATGCTCAAGTTATGGAATGTAA [1254]

Hsa GGAAGTGTGTGGTTTTCGGCAAGT----- [1193]
Mmu GGAAGTGTGTGGTTTTCGGCAAGT----- [1193]
Mdo GGAAGTGTGTGGTTTTCGGGAAGT----- [971]
Meu ----- [715]
Oan GGAAGTGTGTGGTTTTCGGGCCAG--GCTCCCCGGGCCACACACTTCTTTCATATGCCCATA [1153]
Aca GGAAGTGTGTGGTTTTCAAGGAGA--CCTCTTGAGCCTACATACTTCTTTCATATGCCCATA [1388]
Pbi GGAAGTGTGTGGTTTTCAGAAAAGA--CCTCCCAGCCTACATACTTCTTTCATATGCCCATA [1387]
Cpi GGAAGTGTGTGGTTTTCAGGGAGA--CCTCCCAACCCTACATACTTCTTTCATATGCCCATA [1388]
Cmy GGAAGTGTGTGGTTTTCAGGGAGA--CCTCCCAACCCTACATACTTCTTTCATATGCCCATA [1388]
Psi GGAAGTGTGTGGTTTTCAGGGAGA--CCTCCCAACCCTACATACTTCTTTCATATGCCCATA [1228]
Asp GGAAGTGTGTGGTTTTCAGGGAGA--CCTCCCAACCCTACATACTTCTTTCATATGCCCATA [1228]
Ami GGAAGTGTGTGGTTTTCGGGGAGA--CCTCCCAACCCTACATACTTCTTTCATATGCCCATA [1386]
Asi GGAAGTGTGTGGTTTTCGGGGAGA--CCTCCCAACCCTACATACTTCTTTCATATGCCCATA [1303]
Tgu GGAAGTGTGTGGTTTTCAGGGAGA----- [1120]
Cli GGAAGTGTGTGGTTTTCAGGGAGA--CCTCCCAACCCTACATACTTCTTTCATATGCCCATA [1155]
Gga GGAAGTGTGTGGTTTTCAGGGAGA--CCTCCCAACCCTACATACTTCTTTCATATGCCCATA [1155]
Xtr GGAAGTGTGTGGCTTCTCTGAGT--CACCTTTAGGGCACATACTTCTTTTATATGCCCATA [988]
Lch GGAAGTGTGTGGTGTGAGTGA--CACCTCAGGAGCACATACTTCTTTCATATGCCCATA [1234]
Dre GGAAGTGTGTGGTTTTCAGGGGGA----- [1277]

Hsa -----CCTAGTT [1200]
Mmu -----CCTAGTT [1200]
Mdo -----CCTAGTT [978]
Meu -----CCTAGTT [722]
Oan GGGAGCTGCCCGAA-CTATGGAATGTTAAGAAGTGTGTGTTCTTGGGGGCT--TCTAGTT [1210]
Aca TGGAGTCGGCCAGATTTATGGAATGTTAAGAAGTATGTATCGTTGGGATGG--CCTAGTT [1446]
Pbi TGGAGTCGGCCGG--CTATGGAATGTTAAGAAGTATGTATCTTTGGGATCG--TCTAGTT [1443]
Cpi GGGAGTCAGCCGGCGTTATGGAATGTTAAGAAGTATGTATCCTTGGGCTGG--TCTAGTT [1446]
Cmy GGGAGTCAGCCGGCGTTATGGAATGTTAAGAAGTATGTATCTTTGGGCTGG--TCTAGTT [1446]
Psi GGGAGTCAGCTGGCGTTATGGAATGTTAAGAAGTATGTATCTTTGGGCTGG--TCTAGTT [1286]
Asp GGGAGTCAGCTGGCGTTATGGAATGTTAAGAAGTATGTATCTTTGGGCTGG--TCTAGTT [1286]
Ami TGGAGTCGGCTGGTATTATGGAATGTTAAGAAGTATGTATCTTTGGGCTGG--TCTAGTT [1444]
Asi TGGAGTCGGCTGGTATTATGGAATGTTAAGAAGTATGTATCTTTGGGCTGG--TCTAGTT [1361]
Tgu -----CCTAGTT [1127]
Cli TGGAGTCGGCCGGCGTTATGGAATGTTAAGAAGTATGTATTTTGGGCTGG--TCTAGTT [1213]
Gga TGGAGTCGGCCGGCGTTATGGAATGTTAAGAAGTATGTATCCTCGGGCTGG--TCTAGTT [1213]
Xtr CTGAATGAA--AATGCTATGGAATGTTAAGAAGTATGTAACCTAAGGGGTT--TTTAGTT [1044]
Lch TGGAATAATCCCCGGTTATGGAATGTTAAGAAGTATGTATTTATGGGGTGA--TCTAGTT [1292]
Dre -----CTTGCTT [1284]

Hsa CTGTGTGGAAGACTAGTGATTTTGTGTGTTTTAGATAAATAAATCGACAACAAATCACAG [1260]
Mmu CTGTGTGGAAGACTAGTGATTTTGTGTGTTTTAGATAAATAAATCGACAACAAATCACAG [1260]
Mdo CTGTGTGGAAGACTAGTGATTTTGTGTGTTTTAGATAAATAAATCGACAACAAATCACAG [1038]
Meu CTGTGTGGAAGACTAGTGATTTTGTGTGTTTTAGATAAATAAATCGACAACAAATCACAG [782]
Oan CTGTGTGGAAGACTAGTGATTTTGTGTGTTTGTAGATAAATAAATCGACAACAAATCGCAG [1270]
Aca CTGTGTGGAAGACTAGTGATTTTGTGTGTTTTAGATAAATAAATCGACAACAAATCGCAG [1506]
```

Pbi CTGTGTGGAAGACTAGTGATTTTGTGTGTTTTAGATTACTAAAGTGACAACAAATCGCAG [1503]  
Cpi CTGTGTGGAAGACTAGTGATTTTGTGTGTTTTAGATAACTAAATCGACAACAAATCGCAG [1506]  
Cmy CTGTGTGGAAGACTAGTGATTTTGTGTGTTTTAGATAACTAAATCGACAACAAATCGCAG [1506]  
Psi CTGTGTGGAAGACTAGTGATTTTGTGTGTTTTAGATAACTAAATCGACAACAAATCGCAG [1346]  
Asp CTGTGTGGAAGACTAGTGATTTTGTGTGTTTTAGATAACTAAAGCGACAACAAATCGCAG [1346]  
Ami CTGTGTGGAAGACTAGTGATTTTGTGTGTTTTAGATAACTAAATCGACAACAAATCGCAG [1504]  
Asi CTGTGTGGAAGACTAGTGATTTTGTGTGTTTTAGATAACTAAATCGACAACAAATCGCAG [1421]  
Tgu CTGTGTGGAAGACTAGTGATTTTGTGTGTTTTGATAACTAAATGACAACAAATCACAG [1187]  
Cli CTGTGTGGAAGACTAGTGATTTTGTGTGTTTTAGATAACTAAATGACAACAAATCGCAG [1273]  
Gga CTGTGTGGAAGACTAGTGATTTTGTGTGTTTTAGATAAATAAATGACAACAAATCACAG [1273]  
Xtr CTGTGTGGAAGACTAGTGATTTTGTGTGTTTTAGATAACAACATGACAACAAATCGCAG [1104]  
Lch CTGTGTGGAAGACTAGTGATTTTGTGTGTTTTAGGTAAGTGCATGACAACAAATCACAG [1352]  
Dre CTGTGTGGAAGACTTGTGATTTTGTGTGTTTGTAGTTAGATGAAGTGACAACAAATCACGG [1344]

Hsa TCTGCCATATGGCACAGGCCA--GCTGGCCCCATCTGGAAGACTAGTGATTTTGTGTGTT- [1317]  
Mmu TCTGCCATATGGCACAGGCCA--GCCAGCCCCGTTTGGGAAGACTAGTGATTTTGTGTGTT- [1317]  
Mdo TCTGCCATATGGCACAGGCCA--CCTGGCCCCATCTGGAAGACTAGTGATTTTGTGTGTT- [1095]  
Meu TCTGCCATATGGCACAGGCCA--CCTGGCCCCATCTGGAAGACTAGTGATTTTGTGTGTT- [839]  
Oan TCTGCCATATGGCACAGACCA--CCGGGCCCCGCTGGAAGACTAGTGATTTTGTGTGTT- [1327]  
Aca TCTACCATATGGCACAGGCCA--CCCTGCTTCTTATGGAAGACTAGTGATTTTGTGTGTT- [1563]  
Pbi TCTACCATATGGCACAGTCCA--CCGGACTCCTTATGGAAGACTAGTGATTTTGTGTGTTT [1561]  
Cpi TCTGCCATATGGCACAGGCCA--CCCCGTCCCTTATGGAAGACTAGTGATTTTGTGTGTT- [1563]  
Cmy TCTGCCATATGGCACAGGCCA--CCCCGTCCCTTATGGAAGACTAGTGATTTTGTGTGTT- [1563]  
Psi TCTGCCATATGGCACAGGCCA--CCATGTCCCTTATGGAAGACTAGTGATTTTGTGTGTT- [1403]  
Asp TCTGCCATATGGCACAGGCCA--CCATGTCCCTTATGGAAGACTAGTGATTTTGTGTGTT- [1403]  
Ami TCTGCCATATGGCACAGACCA--CCTGACCCTGTATGGAAGACTAGTGATTTTGTGTGTT- [1561]  
Asi TCTGCCATATGGCACAGACCA--CCTGACCCCGTATGGAAGACTAGTGATTTTGTGTGTT- [1478]  
Tgu TCTGCCATATGGCACAGACCA--CCTGCTTCCCTGTGGAAGACTAGTGATTTTGTGTGTT- [1244]  
Cli TCTGCCATATAGCACAGACTG--CCCAGCTCCCTCTGGAAGACTAGTGATTTTGTGTGTT- [1330]  
Gga TCTGCCATATGGCACAGATCA--CGCGGTGCCCTCTGGAAGACTAGTGATTTTGTGTGTT- [1330]  
Xtr TCTGCCATATGGCACAGACCA--GCTGACTCTTTGTGGAAGACTAGTGATTTTGTGTGTT- [1161]  
Lch TCTACCATATAGCACAGGCCA--TCTCAGTCACGGTGGGAAGACTAGTGATTTTGTGTGTT- [1409]  
Dre TCTGCCCTACAGCACAGGCC--ATTTGGGCATTTATGGAAGACTAGTGATTTTGTGTGTT- [1401]

Hsa GTCTTAC--TGCGCTC-AACAACAAATCCCAGTCTACCTAATGGTGCCAGCCA--TCTAG [1372]  
Mmu GTGTCTC--TGTATCC-AACAACAAGTCCCAGTCTGCCACATGGTGCTGGTCA--GCCAG [1372]  
Mdo CTCTAACGTAAGATT-GACAACAAATCCCAGTCTGCCTTATGGTGCTTGGCC--TCAA [1152]  
Meu CTCTAACATAAGATT-GACAACAAATCCCAGTCTGCCTCATGGTGCTTGGCC----- [891]  
Oan CTCTAGCTGACCGCAC-GACAACAAATCCCAGTCTGCCTGACGGTGCCCGGTG----- [1379]  
Aca CTGTAGTTCATCTCAC-GACAACAAGTACAGTCTGCCTTATGGGGCCTGGCC--CTGGT [1620]  
Pbi CTGTAGCTCATCTCAT-GACAACAAGTACAGTCTGCCTTCTGGAGTCTGGCC--CCTGC [1618]  
Cpi CTATAGCTCATCTCAT-GACAACAAGTACAGTCTGCCTTATGGTGCATGGCC--TCTGG [1620]  
Cmy CTATAGCTCATCTCAT-GACAACAAGTACAGTCTGCCTTATGGTGCATGGCC--TCTGG [1620]  
Psi CTATAGCTCATCTCAC-GACAACAAGTACAGTCTGCCTTATGGTGTACGGCC--TCTGG [1460]  
Asp CTATAGCTCATCTCAT-GACAACAAGTACAGTCTGCCTTATGGTGTACGGCC--TCTGG [1460]  
Ami CTATGGCTCATCTCAC-GACAACAAGTACAGTCTGCCTTATGGTGCATGGCC--TCTGG [1618]  
Asi CTATGGCTCATCTCAC-GACAACAAGTACAGTCTGCCTTATGGTGCATGGCC--TCTGG [1535]  
Tgu GTATGGCTCATCCCAC-CACAACAAGTACAGTCTGCCTTAGGGGCACACGGCC--CCTGG [1301]  
Cli GTATGGCTCATCCCAC-CACAACAAGTACAGTCTGCCTTAGGGTGCCTGGCC--TCTGG [1387]  
Gga GTATGGCTCATCCCAC-CACAACAAGTACAGTCTGCCTTAGGGGCACACGGCC--TCTGG [1387]  
Xtr GTAAGCCTTATTGCAT-GACAACAAGTACAGTCTGCCTCACAGTGCCAGCA----- [1213]  
Lch ATACCCTTA-AACAG-GACAGCAAGTACAGTCTGCCTCAGTGCTCGGGACA--TCCAG [1465]  
Dre GTGACGTCATCAGTACTGACAACAAGTACAGTCTGCCTCAGTGACCAGAATC--CCCGA [1459]

Hsa TGCTGTGTGGAAGACTAGTGATTTTGTGTGTTCTGAT--GTA-CTACGA-CAACAAGTAC [1428]  
Mmu TGCTATGTGGAAGACTTGTGATTTTGTGTGTTCTGAT--ATG-ATATGA-CAACAAGTAC [1428]  
Mdo TGCTGTATGGAAGACTAGTGATTTTGTGTGTTGTAAT--ATA-TAAAGA-CAACAAAAC [1208]

```
Meu ----- [ 891 ]
Oan ----- [ 1379 ]
Aca TTCTGGGTGGAAGACTAGTGATTTTGTGTTCTGACTTATAATTTAGA-CAACAAATCGT [ 1679 ]
Pbi TTCTGATTGGAAGACTAGTGATTTTGTGTTCTGGTTTAGAAAGCTGA-CAACAAATCAC [ 1677 ]
Cpi CTCTGTGTGGAAGACTAGTGATTTTGTGTTCTGACTTATAAAAAGTGA-CAACAAATCAT [ 1679 ]
Cmy CTCTGTGTGGAAGACTAGTGATTTTGTGTTCTTACTTATAAAAAGTGA-CAACAAATCAT [ 1679 ]
Psi CTCTGTGTGGAAGACTAGTGATTTTGTGTTCTGAC--ATAAAAAGTGA-CAACAAATCAT [ 1517 ]
Asp CTCTGTGTGGAAGACTAGTGATTTTGTGTTCTGAC--ATAAAAAGTGA-CAACAAATCAT [ 1517 ]
Ami CTCTGCGTGGAAGACTAGTGATTTTGTGTTCTGACTTATAAAGGTGA-CAACAAATCAT [ 1677 ]
Asi CTCTGCGTGGAAGACTAGTGATTTTGTGTTCTGACTTATAAAGGTGA-CAACAAATCAT [ 1594 ]
Tgu CTCTGTGTGGAAGACTAGTGATTTTGTGTTGTG-TTTGTAAAGGTGA-CAACAAATCAT [ 1359 ]
Cli CTCTGCGTGGAAGACTAGTGATTTTGTGTTCTGATTTATAAAGGTGA-CAACAAATCAT [ 1446 ]
Gga CTCTGTGTGGAAGACTAGTGATTTTGTGTTATGATTTATAAAGGTGA-CAACAAATCAT [ 1446 ]
Xtr ----- [ 1213 ]
Lch CTCTGTGTGGAAGACTAGTGATTTTGTGTTTTTGGATGGTAAAGACAG-CAACAAGTCAC [ 1524 ]
Dre TTGCTGTGGAAGACTAGTGATTTTGTGTTGTTTCTTCTGCTTCTGACAACAAGTCAC [ 1519 ]

Hsa AGCCGGCCTCATAGCGCAGACTC----- [ 1451 ]
Mmu AGCCAGCCTCATAGCGTGGACTC----- [ 1451 ]
Mdo AGCCTGCCTTACAGCGTGGACAC----- [ 1231 ]
Meu ----- [ 891 ]
Oan ----- [ 1379 ]
Aca AGCCTGCCGCCAGCGACCACAG----- [ 1702 ]
Pbi AGCCTACCATCCAGCAGGGGCCA----- [ 1700 ]
Cpi AGCCTGCCATACAGCACGGACCA--GGGTCGGTCTGGAAGACTTGTGATTTTGTGTTTTC [ 1737 ]
Cmy AGCCTGCCAAACAGCACAGACCA--GGGTCGGTCTGGAAGACTTGTGATTTTGTGTTTTC [ 1737 ]
Psi AGCCTGCCATACAGCACGGACCC--GGGTCGGTCTGGAAGACTTGTGATTTTGTGTTTTC [ 1575 ]
Asp AGCCTGCCATACAGCACAGACCC--GGGTCGGTCTGGAAGACTTGTGATTTTGTGTTTTC [ 1575 ]
Ami AGCCTGCCATACAGCACAGACTC--GGGTCGGTCTGGAAGACTTGTGATTTTGTGTTTTC [ 1735 ]
Asi AGCCTGCCATACAGCACAGACTC--GGGTCGGTCTGGAAGACTTGTGATTTTGTGTTTTC [ 1652 ]
Tgu AGCCTGCCATACAGCCCAGGCTG----- [ 1382 ]
Cli AGCCTGCCACCCAGCCCAGACCT--GGG-CAGGCTGGAAGACTTGTGATTTTGTGTTTTC [ 1503 ]
Gga AGCCTGCCATACAGCACAGATCT----- [ 1469 ]
Xtr -----GGGTCGGTTTGGAAAGACTAGTGATTTTGTGTTTTC [ 1248 ]
Lch AGTCTGCCATACAGCGTGGAGCC----- [ 1547 ]
Dre AGTCTACCTCAGCGAGCGGGCCC--TCTGCGGAGTGGAAAGACTAGTGATTTTGTGTTGAA [ 1577 ]

Hsa -----GGGCCCC [ 1458 ]
Mmu -----GGGCCTC [ 1458 ]
Mdo -----GGGCCTC [ 1238 ]
Meu -----GGGCCTC [ 898 ]
Oan -----GGTCCTC [ 1386 ]
Aca -----GGTCCTC [ 1709 ]
Pbi -----GGTCCTC [ 1707 ]
Cpi CAGTGTTCAG-GGAAGCGAACAACAAATCCCAGTC-TCCTCACAGCCCCAGG--GGTCCTC [ 1793 ]
Cmy CGGTGTTCAG-GGAAGCGAACAACAAATCCCAGTC-TCCTCACAGCCCCAGG--GGTCCTC [ 1793 ]
Psi TGGTGTTCAG-GGAAGCGAACAACAAATCCCAGTC-TCCTCACAGCCCCAGG--GGTCCTC [ 1631 ]
Asp TGGTGTTCAG-GGAAGCGAACAACAAATCCCAGTC-TCCTCACAGCCCCAGG--GGTCCTC [ 1631 ]
Ami TGGTGTCAA-GGAAGCGAACAACAAATCCCAGTC-TCCTCACAGCCCCAGG--GGTCCTC [ 1791 ]
Asi TGGTGTCAA-GGAAGCGAACAACAAATCCCAGTC-TCCTCACAGCCCCAGG--GGTCCTC [ 1708 ]
Tgu -----GGTCCTC [ 1389 ]
Cli CAATGTCAACGGGAGCGAACAACAAATCCCAGTC-TCCTCCTGCCCGGG--GGTCCTC [ 1560 ]
Gga -----GGTCCTC [ 1476 ]
Xtr TATAAAAAGTTTGTGCACAAACAGCAAATCGTAGTC-TCCACTCTGCCCGAGG--GGTCCTC [ 1305 ]
Lch -----GGTCCTC [ 1554 ]
Dre AATGAACAA--AAACCAACAACAAACCGCAGTCGTCCTCTCAGCACGGGG--GGCACTT [ 1632 ]
```

Hsa TGTGAGCATCTTACCGGACAGTGCTGGATTTCCAGCTTGACTCTAACACTGTCTGGTAA [1518]  
Mmu TGTGGGCATCTTACCGGACAGTGCTGGATTTCTTGGCTTGACTCTAACACTGTCTGGTAA [1518]  
Mdo TGTGGGCATCTTACTAGACAGTGCTGGATTTTT--GGATGTACTCTAACACTGTCTGGTAA [1297]  
Meu TGTGGGCATCTTACTAGACAGTGCTGGATTTTT--GGATGCATTCTAACACTGTCTGGTAA [957]  
Oan CGTGGGCATCTTACTAGACAGTGCTGGATTTG--GGATCTACTCTAACACTGTCTGGTAA [1444]  
Aca TGTGGACATCTTACTAGACAGTGCTGGATTTGTGTGCTCTGATTCTAACACTGTCTGGTAA [1769]  
Pbi TGTGGACATCTTACTAGACAGTGCTGGATTTTTGTCACTGTACTCTAACACTGTCTGGTAA [1767]  
Cpi TGTGGACATCTTACTAGACAGTGCTGGATTTTTTTGGATCTACTCTAACACTGTCTGGTAA [1853]  
Cmy TGTGGACATCTTACTAGACAGTGCTGGATTTTTTTGGATCTACTCTAACACTGTCTGGTAA [1853]  
Psi TGTGGACATCTTACTAGACAGTGCTGGATTTTT--GGATCTACTCTAACACTGTCTGGTAA [1690]  
Asp TGTGGACATCTTACTAGACAGTGCTGGATTTTT--GGATCTACTCTAACACTGTCTGGTAA [1690]  
Ami TGTGGGCATCTTACTAGACAGTGCTGGATATTTTTGGATCTACTCTAACACTGTCTGGTAA [1851]  
Asi TGTGGGCATCTTACTAGACAGTGCTGGATATTTTTGGATCTACTCTAACACTGTCTGGTAA [1768]  
Tgu TGTGGGCATCTTACTAGACAGTGCTGGATTTGTGCCTCTACTCTAACACTGTCTGGTAA [1449]  
Cli TGTGGGCATCTTACTAGACAGTGCTGGATTTTTTTGGATCTACTCTAACACTGTCTGGTAA [1620]  
Gga TGTGGGCATCTTACTAGACAGTGCTGGATTTCTTGGATCTATTCTAACACTGTCTGGTAA [1536]  
Xtr TATGGACATCTTACTAGACAGTGCTGGATTTATTTTTATCTTTTCTAACACTGTCTGGTAA [1365]  
Lch TATGAGCATCTTACTAGACAGTGCTGGATTTACTAATCTTCTCTAACACTGTCTGGTAA [1614]  
Dre AGCAGCCATCTTACCGGACAGTGCTGGACTGTATAACTGTTTTCTAACACTGTCTGGTAA [1692]

Hsa CGATGTTCAAAG-G-TGAC--GGGCAGCCGTGGCCATCTTACTGGGCAGCATTGGATGGA [1574]  
Mmu CGATGTTCAAAG-G-TGAC--GGGCAGCCGTGGCCATCTTACTGGGCAGCATTGGATAGT [1574]  
Mdo CGATGTTTAAAGAG-GGAA--GGGCTGCCATTACCATCTTACTGGGCAGCATTGGATGGT [1354]  
Meu CGATGTTTAAAGAG-GGAA--GGGCTGCCATTACCATCTTACTGGGCAGCATTGGATGGT [1014]  
Oan CGATGTTCAAAGGAA-GGAC--GGGCCGCCACTACCATCTTACTGGGCAGCATTGGATGAG [1501]  
Aca CGATGTTCAAAGGG-TGAG--GGGAGGTCATTGCCATCTTACTGGGCAGCATTGGATGTT [1826]  
Pbi CGATGTTTAAAGAG-CGAG--GAGAAACCATTCTCATCTTACTGGGCAGCGTTGGACGTT [1824]  
Cpi CGATGTTTAAAGGG-TGAA--GGGATGCCATTACCATCTTACTGGGCAGCATTGGATGTT [1910]  
Cmy CGATGTTTAAAGGG-TGAA--GGGATGCCATTACCATCTTACTGGGCAGCATTGGATGTT [1910]  
Psi CGATGTTTAAAGAG-GAAC--GGGATGCCATTACCATCTTACTGGGCAGCATTGGATGTT [1747]  
Asp CGATGTTTAAAGAG-GAAC--GGGATGCCATTACCATCTTACTGGGCAGCATTGGATGTT [1747]  
Ami CGATGTTTAAAGGG-TGAA--GGGATGCCGTTACCATCTTACTGGGCAGCATTGGATGTT [1908]  
Asi CGATGTTTAAAGGG-TGAA--GGGATGCCGTTACCATCTTACTGGGCAGCATTGGATGTT [1825]  
Tgu CGATGTTTAAAGGG-TGAT--GAGATGTCCTCAGCATCTTACTGGGCAGCATTGGATGAT [1506]  
Cli CGATGTTTAAAGGG-TGAA--GAGATGCCATTACCATCTTACTGGGCAGCATTGGATGTT [1677]  
Gga CGATGTTTAAAGGG-TGAA--GAGATGCCATTACCATCTTACTGGGCAGCATTGGATGTT [1593]  
Xtr CGATGTTTAAAGAG-TGAG--GTGGCGCTATTGCCATCTTACTGGGCAGCATTGGATTTT [1422]  
Lch CGATGTTTAAAGGGGTGAA--GGGATGTTATTGCCATCTTACTGGGCAGCATTGGATGTA [1672]  
Dre CGATGTTTGTGGG-TGAC--TGGTAGTCGCTCCATCTTACGAGGCAGCATTGGATTTTC [1749]

Hsa GTCAG-GTCTCTAATACTGCCTGGTAATGATGACGGCGGAGCCC--CCGCCGATGGGCG [1631]  
Mmu GTCTG-ATCTCTAATACTGCCTGGTAATGATGACGGCGGAGCCC--CCTGCTGATGGATG [1631]  
Mdo GTCTGTGTTTCTAATACTGCCTGGTAATGATGATGATGGGGTCC--CCTGCTGATTGGTG [1412]  
Meu GTCTGTGTTTCTAATACTGCCTGGTAATGATGATGATGGGGTCC--CCTGATGATTGGTG [1072]  
Oan TTCTGTGTTTCTAATACTGCCTGGTAATGATGATGGCCGCGGCC--CCTGCTGATTGGTG [1559]  
Aca TTCTGTCTTTCTAATACTGCCTGGTAATGATGATTGTGGCCTTC--CCTGCTGATCGCTG [1884]  
Pbi TTATGAGTTTCTAATACTGCCTGGTAAAGATGTTAATGGCGTCT--CCTGCCGATCGCTG [1882]  
Cpi TTCTGTGTTTCTAATACTGCCTGGTAATGATGATTATGGTGTCT--CCTGCTGATTGATG [1968]  
Cmy TTCTGTGTTTCTAATACTGCCTGGTAATGATGATTATGGTGTCT--CCTGCTGATTGATG [1968]  
Psi TTCTGTGTTTCTAATACTGCCTGGTAATGATGATTATGGTGTCT--CCTGCTGATTGATG [1805]  
Asp TTCTGTGTTTCTAATACTGCCTGGTAATGATGATTATGGTGTCT--CCTGCTGATTGATG [1805]  
Ami TTCTGTGTTTCTAATACTGCCTGGTAATGATGATTATGGTGTCT--CCTGCTGATTGACG [1966]  
Asi TTCTGTGTTTCTAATACTGCCTGGTAATGATGATTATGGTGTCT--CCTGCTGATTGACG [1883]  
Tgu CCATGCCGCTCTAATACTGCCTGGTAATGATGATGAAGGCTCTT----- [1550]  
Cli TTCTGTCTTTCTAATACTGCCTGGTAATGATGATTATGGTGTTT--CCTGCTGATTGCTG [1735]  
Gga CTCTGTTTTTCTAATACTGCCTGGTAATGATGATTGTGGTGTTT--CCTGCTGATTGCTG [1651]  
Xtr GTCTATGTTTCTAATACTGCCTGGTAATGATGATTATGGCGCCC--CCTGTTGACCAATG [1480]



Lch CTCTGATTTTCTAATACTGCCTGGTAATGATGATGATGGTATCC--CCTGTTGACTGACG [1730]  
Dre ATTACTTTTTCTAATACTGCCTGGTAATGATGATGATTGCTGCC--CTTGTGATGGACG [1807]

Hsa TCTTACCAGACATGGTTAGACCT----GGCCCTCTGTCTAATACTGTCTGGTAAAACCGT [1687]  
Mmu TCTTACCAGACATGGTTAGATCT--GGATGCATCTGTCTAATACTGTCTGGTAATGCCGT [1689]  
Mdo TCTTACCAGACAAAGTTAGATCT--CGCTATTTCTGTCTAATACTGTCTGGTAATGCCAT [1470]  
Meu TCTTACCAGACAAAGTTAGATCT--CGCTATTTCCGTCTAATACTGTCTGGTAATGCCAT [1130]  
Oan TCTTACCAGACAAAGTTAGATCT--GACTATTTTCGTCTAATACTGTCTGGTAATGCCGT [1617]  
Aca TCTTACCAGACAAAGTTAGATCTT-AGCTATCCCCGTCTAATACTGTCTGGTAATGCCGT [1943]  
Pbi TCTTACCAGACAAATTTAGATCTTAATCTATTTCCTGTCTAATACTGTCTGGTAATGCCGT [1942]  
Cpi TCTTACCAGACAAAGTTAGATCT--AGCTATTTTCGTCTAATACTGTCTGGTAATGCCGT [2026]  
Cmy TCTTACCAGACAAAGTTAGATCT--AGCTATTTT-CGTCTAATACTGTCTGGTAATGCCGT [2025]  
Psi TCTTACCAGACAAAGTTAGATCT--AGCTATTTTCGTCTAATACTGTCTGGTAATGCCGT [1863]  
Asp TCTTACCAGACAAAGTTAGATCT--AGCTATTTTCGTCTAATACTGTCTGGTAATGCCGT [1863]  
Ami TCTTACCAGACAAAGTTAGATCT--AGCTATTTTCGTCTAATACTGTCTGGTAATGCCGT [2024]  
Asi TCTTACCAGACAAAGTTAGATCT--AGCTATTTTCGTCTAATACTGTCTGGTAATGCCGT [1941]  
Tgu ----- [1550]  
Cli TCTTACCAGGCAAAGTTAGATCT--AGCTATTTTTGTCTAATACTGTCTGGTAATGCCGT [1793]  
Gga TCTTACCAGGCAAAGTTAGATCT--AGCTATTTCTGTCTAATACTGTCTGGTAATGCCGT [1709]  
Xtr TCTTACCAGACAAGGTTAGATCT--AGTTACTCTCGTCTAATACTGTCTGGTAATGCCGT [1538]  
Lch TCTTACCAGACAAGGTTAGATCT--AGCTATTTCTGTCTAATACTGTCTGGTAATGCCGT [1788]  
Dre TCTTACCAGACATGGTTAGATGT--AATAACTTGTGTCTAATACTGTCTGGTAATGCCGT [1865]

Hsa CCATCCGCTGC--TGGGCGGGGGCCCTCGTCTTACCCAGCAGTGT'TTGGGTGC--GGT'TGG [1744]  
Mmu CCATCCACGGC--TGGGTAGGGGGCCCTCGTCTTACCCAGCAGTGT'TTGGGTGCTGGT'TGG [1747]  
Mdo TGGT-CACACT--CGGGACTGGCGCCCCATCTTACCCAGCAGTGT'TTGGGTGCCGCTCGG [1527]  
Meu TGGT-CACACT--TGGGACTGGTGCCCCGTCTTACCCAGTAGTGT'TTGGGTGCTGGT'TGG [1187]  
Oan CAAT-CACAGC----- [1627]  
Aca CGAT-CGCATT----- [1953]  
Pbi CGATTTCGCATT----- [1953]  
Cpi CCAT-CGCATT----- [2036]  
Cmy CCAT-CGCATT----- [2035]  
Psi CTAT-CGCATT----- [1873]  
Asp CTAT-CGCATT----- [1873]  
Ami TGAT-CGCACT----- [2034]  
Asi TGAT-CGCACT----- [1951]  
Tgu ----- [1550]  
Cli CAAT-CGCATC----- [1803]  
Gga CAAT-CGCATG----- [1719]  
Xtr TGGT-CACATT----- [1548]  
Lch TGAT-TACATG--GGGAAAGTGGCCACCATCTTACCGAGCAGCATTTGA-TGT-GAGTCT [1843]  
Dre CCAT-CACATG--TGGATGCCTGGCTCCATCTTACAAGGCAGT-TTTGGATGTTATATCT [1921]

Hsa GAGTCTCTAATACTGCCGGGTAATGATGGAGGCCCCCTGTCC--GGCCCTGGGTCCATCTTT [1802]  
Mmu GAGTCTCTAATACTGCCGGGTAATGATGGAGGCCCCCTGTCC--GGCTCTGGGTCCATCTTT [1805]  
Mdo GAGTCTCTAATACTGCCGGGTAATGATGGAGGTCCCTT-TCC--AGCTCTGGGGCCATCTTT [1584]  
Meu GAGTCTCTAATACTGCCGGGTAACGATGGAGGTCCCTT-TCC----- [1227]  
Oan ----- [1627]  
Aca ----- [1953]  
Pbi ----- [1953]  
Cpi ----- [2036]  
Cmy ----- [2035]  
Psi ----- [1873]  
Asp ----- [1873]  
Ami ----- [2034]  
Asi ----- [1951]  
Tgu ----- [1550]

---

---

|     |                                                                 |        |
|-----|-----------------------------------------------------------------|--------|
| Cli | -----                                                           | [1803] |
| Gga | -----                                                           | [1719] |
| Xtr | -----                                                           | [1548] |
| Lch | CAGTGTCTAATACTGCCTGGTAATGATGGAG-CCATTTTCC-----                  | [1883] |
| Dre | ---TCTCTAATACTGCCTGGTAATGATGCAGATGGTCATCT--TCTCTAGGGTACATCTT    | [1976] |
|     |                                                                 |        |
| Hsa | CCAGTACAGTG--TTGGATGGTCTAATTGTGAAGCTCCTAACACTGTCTGGTAAAGATGGC   | [1861] |
| Mmu | CCAGTGCAGTG--TTGGATGGTTGAAGTATGAAGCTCCTAACACTGTCTGGTAAAGATGGC   | [1864] |
| Mdo | CCAGTACAGTG-GTGGATGGT-----GAAGCTTCTAACACTGTCTGGTAAAGATGCC       | [1635] |
| Meu | -----                                                           | [1227] |
| Oan | -----                                                           | [1627] |
| Aca | -----                                                           | [1953] |
| Pbi | -----                                                           | [1953] |
| Cpi | -----                                                           | [2036] |
| Cmy | -----                                                           | [2035] |
| Psi | -----                                                           | [1873] |
| Asp | -----                                                           | [1873] |
| Ami | -----                                                           | [2034] |
| Asi | -----                                                           | [1951] |
| Tgu | -----                                                           | [1550] |
| Cli | -----                                                           | [1803] |
| Gga | -----                                                           | [1719] |
| Xtr | -----                                                           | [1548] |
| Lch | -----                                                           | [1883] |
| Dre | ACCTGACAGTGCTTGGCTGTTC-----ACTGATGTTCTAACACTGTCTGGTAAACGATG-C   | [2030] |
|     |                                                                 |        |
| Hsa | TCCCGGGTGGG--CGGGGTTGGTTGTTATCTTTGGTTATCTAGCTGTATGAGTGGTGTGG    | [1919] |
| Mmu | CCCCGGGTCAG--CGGGGTTGGTTGTTATCTTTGGTTATCTAGCTGTATGAGTGGTGTGG    | [1922] |
| Mdo | CTCCGGGTTGG--CGGGGTTGGTTGTTATCTTTGGTTATCTAGCTGTATGAGTGGTGTCTG   | [1693] |
| Meu | -----CGGGGTTGGTTGTTATCTTTGGTTATCTAGCTGTATGAGTGGTGTCTG           | [1274] |
| Oan | -----                                                           | [1627] |
| Aca | -----                                                           | [1953] |
| Pbi | -----AGGGGTTGGTTGTTATCTTTGGTTATCTAGCTGTATGAGTGGGGTCA            | [2000] |
| Cpi | -----AGGGGTTGGTTGTTATCTTTGGTTATCTAGCTGTATGAGTGGTGTCA            | [2083] |
| Cmy | -----AGGGGTTGGTTGTTATCTTTGGTTATCTAGCTGTATGAGTGGTGTCA            | [2082] |
| Psi | -----AGGGGTTGGTTGTTATCTTTGGTTATCTAGCTGTATGAGTGGTGTCA            | [1920] |
| Asp | -----AGGGGTTGGTTGTTATCTTTGGTTATCTAGCTGTATGAGTGGTGTCA            | [1920] |
| Ami | -----AGGGGTTGGTTGTTATCTTTGGTTATCTAGCTGTATGAGTGGTGTCA            | [2081] |
| Asi | -----AGGGGTTGGTTGTTATCTTTGGTTATCTAGCTGTATGAGTGGTGTCA            | [1998] |
| Tgu | -----                                                           | [1550] |
| Cli | -----AGGGGTTGGTTGTTATCTTTGGTTATCTAGCTGTATGAGTGGTGTCTG           | [1850] |
| Gga | -----AGGGGTTGGTTGTTATCTTTGGTTATCTAGCTGTATGAGTGGTGTCTG           | [1766] |
| Xtr | -----AGGGGTTGGTTGTTATCTTTGGTTATCTAGCTGTATGAGTGGTGTCTG           | [1595] |
| Lch | -----AGGGGTTGGTTGTTATCTTTGGTTATCTAGCTGTATGAGTGGTGTCTG           | [1930] |
| Dre | ACTCTGGTGAC--AGGGGTTGGCTGTATCTTTGGTTATCTAGCTGTATGAGTGGTATTC     | [2088] |
|     |                                                                 |        |
| Hsa | AGTCTTCATAAAGCTAGATAAACC GAAAGTAAAAATAACCCCA--GAAGCGAGTTGTTATC  | [1977] |
| Mmu | AGTCTTCATAAAGCTAGATAAACC GAAAGTAAAAATAACCCCA--GAAGCGAGTTGTTATC  | [1980] |
| Mdo | AGTCTTCATAAAGCTAGATAAACC GAAAGTAAAAATAACCCCA--GAAGTGAAGTTGTTATC | [1751] |
| Meu | AGTCTTCATAAAGCTAGATAAACC GAAAGTAAAAATAACCCCA--GAAGTGAAGTTGTTATC | [1332] |
| Oan | -----GAAGCGAGTTGTTATC                                           | [1643] |
| Aca | -----GAAGCGAGTTGTTGTC                                           | [1969] |
| Pbi | AGTCTTCATAAAGCTAGATAAACC GAAAGTAAAAATAACCCCA--GAAGCGAGTTGTTATC  | [2058] |
| Cpi | ATTCTTCATAAAGCTAGATAAACC GAAAGTAAAAATAACCCCA--GAAGCGAGTTGTTATC  | [2141] |
| Cmy | ATTCTTCATAAAGCTAGATAAACC GAAAGTAAAAATAACCCCA--GAAGCGAGTTGTTATC  | [2140] |
| Psi | ATTCTTCATAAAGCTAGATAAACC GAAAGTAAAAATAACCCCA--GAAGCGAGTTGTTATC  | [1978] |
| Asp | ATTCTTCATAAAGCTAGATAAACC GAAAGTAAAAATAACCCCA--GAAGCGAGTTGTTATC  | [1978] |

Ami ATTCTTCATAAAGCTAGATAAACCAGAAAGTAAAAATAACCCCA--GAAGCGAGTTGTTATC [2139]  
Asi ATTCTTCATAAAGCTAGATAAACCAGAAAGTAAAAATAACCCCA--GAAGCGAGTTGTTATC [2056]  
Tgu -----GAAGCGAGTTGTTATC [1566]  
Cli ATTCTTCATAAAGCTAGATAAACCAGAAAGTAAAAATAACCCCA--GAAGTGAGTTGTTATC [1908]  
Gga ATTCTTCATAAAGCTAGATAAACCAGAAAGTAAAAATAACCCCA--GAAGCGAGTTGTTATC [1824]  
Xtr ATCCTTCATAAAGCTAGATAAACCAGAAAGTAAAAATAACCCCA--GAAGTG-GTTGTTATC [1652]  
Lch ATTCTTCATAAAGCTAGATAAACCAGAAAGTAAAAATAACCCCA--GAAGTGAGTTGTTATC [1988]  
Dre ATTCTTCATAAAGCTAGATAAACCAGAAAGTAAACAAGAATCCCA--GAGGCGTGTTGTTATC [2146]

Hsa TTTGGTTATCTAGCTGTATGAGTGTATTGGTCTTCATAAAGCTAGATAAACCAGAAAGTAAA [2037]  
Mmu TTTGGTTATCTAGCTGTATGAGTGTATTGGTCTTCATAAAGCTAGATAAACCAGAAAGTAAA [2040]  
Mdo TTTGGTTATCTAGCTGTATGAGTGTATTGGTCTTCATAAAGCTAGATAAACCAGAAAGTAAA [1811]  
Meu TTTGGTTATCTAGCTGTATGAGTGTATTGGTCTTCATAAAGCTAGATAAACCAGAAAGTAAA [1392]  
Oan TTTGGTTATCTAGCTGTATGAGTGTATTGGTCTTCATAAAGCTAGATAAACCAGAAAGTAAAG [1703]  
Aca TTTGGTTATCTAGCTGTATGAGTGTGTTGGTCTTCATAAAGCTAGATAAACCAGAAAGTAAA [2029]  
Pbi TTTGGTTATCTAGCTGTATGAGTGTGTTGGCCTTCATAAAGCTAGATAAACCAGAAAGTAAA [2118]  
Cpi TTTGGTTATCTAGCTGTATGAGTGTGTTGGTCTTCATAAAGCTAGATAAACCAGAAAGTAAA [2201]  
Cmy TTTGGTTATCTAGCTGTATGAGTGTGTTGGTCTTCATAAAGCTAGATAAACCAGAAAGTAAA [2200]  
Psi TTTGGTTATCTAGCTGTATGAGTGTGTTGGTCTTCATAAAGCTAGATAAACCAGAAAGTAAA [2038]  
Asp TTTGGTTATCTAGCTGTATGAGTGTGTTGGTCTTCATAAAGCTAGATAAACCAGAAAGTAAA [2038]  
Ami TTTGGTTATCTAGCTGTATGAGTGTGTTGGTCTTCATAAAGCTAGATAAACCAGAAAGTAAA [2199]  
Asi TTTGGTTATCTAGCTGTATGAGTGTGTTGGTCTTCATAAAGCTAGATAAACCAGAAAGTAAA [2116]  
Tgu TTTGGTTATCTAGCTGTATGAGTGTGTTGGTCTTCATAAAGCTAGATAAACCAGAAAGTAAA [1626]  
Cli TTTGGTTATCTAGCTGTATGAGTGTGTTGGTCTTCATAAAGCTAGATAAACCAGAAAGTAAA [1968]  
Gga TTTGGTTATCTAGCTGTATGAGTGTGTTGGTCTTCATAAAGCTAGATAAACCAGAAAGTAAA [1884]  
Xtr TTTGGTTATCTAGCTGTATGAGTGTATTGGTCTTCATAAAGCTAGATAAACCAGAAAGTAAA [1712]  
Lch TTTGGTTATCTAGCTGTATGAGTGTGTTGGTCTTCATAAAGCTAGATAAACCAGAAAGTAAA [2048]  
Dre TTTGGTTATCTAGCTGTATGAGTGTGCTGGCCGTCATAAAGCTAGATAAACCAGAAAGTAAAG [2206]

Hsa AACTCCTTC--AGGCCGTTTCTCTCTTTGGTTATCTAGCTGTATGAGTGCCACAGAGCC [2095]  
Mmu AACTCCTTC--AGGCCGTTTCTCTCTTTGGTTATCTAGCTGTATGAGTGCCACAGAGCC [2098]  
Mdo AACTCCTTC--AGGCCGTTTCTCTCTTTGGTTATCTAGCTGTATGAGTGTTATTGAGCT [1869]  
Meu AACTCCTTC----- [1401]  
Oan AACTCCTTC----- [1712]  
Aca AACTCCTTC--AGGCCGTTTCTGTCTTTGGTTATCTAGCTGTATGAGTGTAATCGACCC [2087]  
Pbi AACTCCTTC--AGGCCGTTTCTGTCTTTGGTTATCTAGCTGTATGAGTGTTATCAAGCC [2176]  
Cpi AACTCCTTC--AGGGCTGTTTCTGTCTTTGGTTATCTAGCTGTATGAGTGTTATTAAGCC [2259]  
Cmy AACTCCTTC--AGGGCTGTTTCTGTCTTTGGTTATCTAGCTGTATGAGTGTTATTAAGCC [2258]  
Psi AACTCCTTC--AGGGCTGTTTCTGTCTTTGGTTATCTAGCTGTATGAGTGTTATTAAGCC [2096]  
Asp AACTCCTTC--AGGGCTGTTTCTGTCTTTGGTTATCTAGCTGTATGAGTGTTATTAAGCC [2096]  
Ami AACTCCTTC--AGGGCTGTTTCTGTCTTTGGTTATCTAGCTGTATGAGTGTTCTCGAGCC [2257]  
Asi AACTCCTTC--AGGGCTGTTTCTGTCTTTGGTTATCTAGCTGTATGAGTGTTCTCGAGCC [2174]  
Tgu AACTCCTTC--AGGGATGTTTCTGTCTTTGGTTATCTAGCTGTATGAGTGTTGTGGAGCC [1684]  
Cli AACTCCTTC--AGGGATGTTTCTGTCTTTGGTTATCTAGCTGTATGAGTGTTGTGGAGCC [2026]  
Gga AACTCCTTC--AGGGATGTTTCTGTCTTTGGTTATCTAGCTGTATGAGTGTTGTGGAGCC [1942]  
Xtr AACTCCTTC--GAGTGTGTTTCTATCTTTGGTTATCTAGCTGTATGAGTGTAATAAGCC [1770]  
Lch AACTGCTTC--GAGTCCGTTTCTGTCTTTGGTTATCTAGCTGTATGAGTGTTATTAAGCC [2106]  
Dre AGCCGCTTC--GAGGTAGTTGCTATCTTTGGTTATCTAGCTGTATGAGTGTTATCTGCC [2264]

Hsa GTCATAAAGCTAGATAAACCAGAAAGTAGAAATGATTC----- [2132]  
Mmu GTCATAAAGCTAGATAAACCAGAAAGTAGAAATGACTCT----- [2135]  
Mdo ATCATAAAGCTAGATAAACCAGAAAGTAGAAATGACTTT--CTGAGCTGG--TTTTGATCTTT [1926]  
Meu -----CTGAGCTGGGTTTTGATCTTT [1422]  
Oan -----CTGAGCTGG--CTTTGGTCTTT [1732]  
Aca ATCATAAAGCTAGATAAACCAGAAAGTAGAAATGACTCC--CAGGGCCGG--CTCTTCTCTTT [2144]  
Pbi ATCATAAAGCTAGATAAACCAGAAAGTAGAAATGACTTC--CAGGGTCGG--TTTCTCTCTTT [2233]  
Cpi ATCATAAAGCTAGATAAACCAGAAAGTAGAAATGACTTC--CTGGGTGG--TTTTTGTCTTT [2316]

Cmy ATCATAAAGCTAGATAACCGAAAGTAGAAATGACTTC--CTGGGTGG--TTTTTGTCTTT [2315]  
Psi ATCATAAAGCTAGATAACCGAAAGTAGAAATGACTTC--CTGGGTGG--TTTTTGTCTTT [2153]  
Asp ATCATAAAGCTAGATAACCGAAAGTAGAAATGACTTC--CTGGGTGG--TTTTTGTCTTT [2153]  
Ami GTCATAAAGCTAGATAACCGAAAGTAGAAATGACTTC--CTGGGTGGG--TTTTTGTCTTT [2314]  
Asi GTCATAAAGCTAGATAACCGAAAGTAGAAATGACTTC--CTGGGTGGG--TTTTTGTCTTT [2231]  
Tgu ATCATAAAGCTAGATAACCGAAAGTAGAAATGACTTC----- [1721]  
Cli ATCATAAAGCTAGATAACCGAAAGTAGAAATGACTTC--CTGGGTGG--TTTTTGTCTTT [2083]  
Gga ATCATAAAGCTAGATAACCGAAAGTAGAAATGACTTC--TTGGGTGG--TTTTTGTCTTT [1999]  
Xtr GTCATAAAGCTAGATAACCGAAAGTAGGAATCACTTC--TTGAATTGG--TTTCTGTCTTT [1827]  
Lch ATCATAAAGCTAGATAACCGAAAGTAGAAATGACTTC--ATAGGTTAG--TTTTTTTCTTT [2163]  
Dre TTCATAAAGCTAGATAACCGAAAGTAGAAATGTCTC--ATGGGTTAG--TTTTTGTCTTT [2321]

Hsa ----- [2132]  
Mmu ----- [2135]  
Mdo GGTTTCCTAGCTGTGTGAGTGTCTCTGA-ATCATAAAGCTGGAGAACCGAATGTGGAAAC [1985]  
Meu GGTTTCCTAGCTGTGTGAGTATTTCTGA-ATCATAAAGCTGGAGAACCGAATGTGGAAAC [1481]  
Oan GGTTATCTAGCTGTATGAGTGTATGTGATGTCATAAAGCTAGAGAACCGAATGTAAAAAC [1792]  
Aca GGTTATCTAGCTGTATGAGTGCCTGGTTTCATAAAGCTAGAGAACCGAACGTACGAAC [2204]  
Pbi GGTTATCTAGCTGTATGAGTGTATCTGATGTCATAAAGCTAGAGAACCGAATGTACAAAC [2293]  
Cpi GGTTATCTAGCTGTATGAGTGTATGTGATATCATAAAGCTAGAGAACCGAATGTAAAAAC [2376]  
Cmy GGTTATCTAGCTGTATGAGTGTATGTGATATCATAAAGCTAGAGAACCGAATGTAAAAAC [2375]  
Psi GGTTATCTAGCTGTATGAGTGTATGTGATATCATAAAGCTAGAGAACCGAATGTAAAAAC [2213]  
Asp GGTTATCTAGCTGTATGAGTGTATGTGATATCATAAAGCTAGAGAACCGAATGTAAAAAC [2213]  
Ami GGTTATCTAGCTGTATGAGTGTATGTGATATCATAAAGCTAGACAACCGAATGTAAAAAC [2374]  
Asi GGTTATCTAGCTGTATGAGTGTATGTGATATCATAAAGCTAGACAACCGAATGTAAAAAC [2291]  
Tgu ----- [1721]  
Cli GGTTATCTAGCTGTATGAGTGTATGTGATATCATAAAGCTAGAGAACCGAATGTAAAAAC [2143]  
Gga GGTTATCTAGCTGTATGAGTGTATGTGATATCATAAAGCTAGAGAACCGAATGTAAAAAC [2059]  
Xtr GGTTACCTAGCTGTATGAGTATAACTAATGTCATAAAGCTAGACAACCGAACGTATAAAC [1887]  
Lch GGTTATCTAGCTGTATGAGTGTATCTGATATCATAAAGCTAGAGAACCGAATGTAAAAAC [2223]  
Dre GGTTATCTAGCTGTATGAGTTTATGTGATATCATAAAGCTAGAGAACCGAATGTATAAAC [2381]

Hsa -----CTTCTGTATATACCCTGTAGATCCGAATTTGTGTAAGGAATTTTGTGGTCA [2183]  
Mmu -----CTTCTGTATATACCCTGTAGATCCGAATTTGTGTAAGGAATTTTGTGGTCA [2186]  
Mdo CAGCTGC--CTTCTGTATATACCCTGTAGATCCGAATTTGTGTAAGGAATTTTGTGGTCA [2043]  
Meu CAGCTGC--CTTCTGTATATACCCTGTAGATCCGAATTTGTGTAAGGAATTTTGTGGTCA [1539]  
Oan CAGCTTC--CTTCTGTATATACCCTGTAGATCCGAATTTGTGTAAGGAGTTTCGTGGTCA [1850]  
Aca CGGCCCG--CTTCTGTATGTACCCTGTAGATCCGAATTTGTGTAAGGAAGAACTGCG-TCA [2261]  
Pbi CGCCCCG--CTTCTGTATGTACCCTGTAGATCCGAATTTGTGTAAGGAAGAACTGCC-TCA [2350]  
Cpi TGATTCA--CTTCTATATGTACCCTGTAGATCCGAATTTGTGTAAGGAAGTTGTG-TCA [2433]  
Cmy TGATTCA--CTTCTATATGTACCCTGTAGATCCGAATTTGTGTAAGGAAGTTGTG-TCA [2432]  
Psi TGATTCA--CTTCTATATGTACCCTGTAGATCCGAATTTGTGTAAGGAAGTTGTG-TCA [2270]  
Asp TGATTCA--CTTCTATATGTACCCTGTAGATCCGAATTTGTGTAAGGAAGTTGTG-TCA [2270]  
Ami CGGCTCG--CTTCTATATGTACCCTGTAGATCCGAATTTGTGTAAGGAAGTTGCG-TCA [2431]  
Asi CGGCTCG--CTTCTATATGTACCCTGTAGATCCGAATTTGTGTAAGGAAGTTGCG-TCA [2348]  
Tgu ----- [1721]  
Cli CCGCTCG--CTTCTATATGTACCCTGTAGATCCGAATTTGTGTAAGGAAGTTGGG-TCA [2200]  
Gga CCGCTCG--CTTCTATATGTACCCTGTAGATCCGAATTTGTGTAAGGAAGTTGGG-TCA [2116]  
Xtr CAGTTCC--CCTCTGTATGTACCCTGTAGATCCGAATTTGTGTGAGCGCAATCATA-TCA [1944]  
Lch TAATTCT--CTTCTATATATACCCTGTAGATCCGAATTTGTGTGAACAGATTTGTGGTCA [2281]  
Dre TAATTCC--CATCTATATATACCCTGTAGATCCGAATTTGTGTGAATA----TACAGTGC [2435]

Hsa CAAATTCGTATCTAGGGGAATATGTAGTTG--GTTGTCTATATATACCCTGTAGAACCGA [2241]  
Mmu CAAATTCGTATCTAGGGGAATATGTAGTTG--GTTGTCTATATATACCCTGTAGAACCGA [2244]  
Mdo CAAATTCGTATCTAGGGGAATATGTAGTTG--GTTGTCTATATATACCCTGTAGAACCGA [2101]  
Meu CAAATTCGTATCTAGGGGAATATGTAGTTG--GTTGTCTATATATACCCTGTAGAACCGA [1597]  
Oan CAAATTCGTATCTAGGGGAATATGTAGTTG--GTTGTCTATATATACCCTGTAGAACCGA [1908]

Aca CAAATTCGCGTCTAGGGGAATATGTAGTAG--GTTGTCTATATATACCCTGTAGAACCGA [2319]  
Pbi CAAATTCGCATCTAGGGGAATATGTAGTTG--GTTGTCTATATATACCCTGTAGAACCGA [2408]  
Cpi CAAATTCGTATCTAGGGGAATATGTAGTTG--GTTGTCTATATATACCCTGTAGAACCGA [2491]  
Cmy CAAATTCGTATCTAGGGGAATATGTAGTTG--GTTGTCTATATATACCCTGTAGAACCGA [2490]  
Psi CAAATTCGTATCTAGGGGAATATGTAGTTG--GTTGTCTATATATACCCTGTAGAACCGA [2328]  
Asp CAAATTCGTATCTAGGGGAATATGTAGTTG--GTTGTCTATATATACCCTGTAGAACCGA [2328]  
Ami CAAATTCGTATCTAGGGGAATATGTAGTTG--GTTGTCTATATATACCCTGTAGAACCGA [2489]  
Asi CAAATTCGTATCTAGGGGAATATGTAGTTG--GTTGTCTATATATACCCTGTAGAACCGA [2406]  
Tgu -----GTTGTCTATATATACCCTGTAGAACCGA [1749]  
Cli CAAATTCGTATCTAGGGGAATATGTAGTTG--GTTGTCTATATATACCCTGTAGAACCGA [2258]  
Gga CAAATTCGTATCTAGGGGAATATGTAGTTG--GTTGTCTATATATACCCTGTAGAACCGA [2174]  
Xtr CAAATTCGTGTCTAGGGGGATATGCAGTTG--GTTGTCTATATGTACCCTGTAGAACCGA [2002]  
Lch CAAATTCGTGTCTAGGGGAGTATGTAGTTG--GTCGTCTATATATACCCTGTAGAACCGA [2339]  
Dre CAAATTCGTGTCTAGGGGAATATGTAGTTG--GTCGTCTATATATACCCTGTAGAACCGA [2493]

Hsa ATTTGTGTGGTATCCGTATAGTCACAGATTTCGATTCTAGGGGAATATATGGTCGATG--- [2298]  
Mmu ATTTGTGTGGTACCCACATAGTCACAGATTTCGATTCTAGGGGAATATATGGTCGATG--- [2301]  
Mdo ATTTGTGTGGTATTTACATAGTCACAGATTTCGATTCTAGGGGAATATATGGTCGATG--- [2158]  
Meu ATTTGTGTGGTATTCACATAGTCACAGATTTCGATTCTAGGGGAATATATGGTCGATG--- [1654]  
Oan ATTTGTGTGGTATTCACATAGTCACAGATTTCGATTCTAGGGGAATATATGGTCGATG--- [1965]  
Aca ATTTGTGTGGTATTTACACAGTCACAGATTTCGATTCTAGGGGAATATATGGTCGATG--G [2377]  
Pbi ATTTGTGTGGTATTTACGTAGTCACAGATTTCGATTCTAGGGGAATATATGGTCGATG--A [2466]  
Cpi ATTTGTGTGGTATTCACATAGTCACAGATTTCGATTCTAGGGGAATATATGGTCGATG--G [2549]  
Cmy ATTTGTGTGGTATTCACATAGTCACAGATTTCGATTCTAGGGGAATATATGGTCGATG--G [2548]  
Psi ATTTGTGTGGTATTCACATAGTCACAGATTTCGATTCTAGGGGAATATATGGTCGATG--G [2386]  
Asp ATTTGTGTGGTATTCACATAGTCACAGATTTCGATTCTAGGGGAATATATGGTCGATG--G [2386]  
Ami ATTTGTGTGGTATTCACATAGTCACAGATTTCGATTCTAGGGGAATATATGGTCGATG--G [2547]  
Asi ATTTGTGTGGTATTCACATAGTCACAGATTTCGATTCTAGGGGAATATATGGTCGATG--G [2464]  
Tgu ATTTGTGTGATATTCATATAGTCACAGATTTCGATTCTAGGGGAATATATGGTCGATG--- [1806]  
Cli ATTTGTGTGATATTCATATAGTCACAGATTTCGATTCTAGGGGAATATATGGTCGATG--G [2316]  
Gga ATTTGTGTGATATTCATATAGTCACAGATTTCGATTCTAGGGGAATATATGGTCGATG--- [2231]  
Xtr ATTTGTGTGGT--TCGTACAGTCACAGATTTCGATTCTAGGGGGATATATGGTCGATG--G [2058]  
Lch ATTTGTGTGATGTTATCAGAATCAGATTTCGATTCTAGGGGAGTATATGGTCGATG--G [2397]  
Dre ATTTGTGTGAAAAATAACATTTCACAGATTTCGATTCTAGGGGAGTATATGGTCGATG--G [2551]

Hsa ----- [2298]  
Mmu ----- [2301]  
Mdo ----- [2158]  
Meu ----- [1654]  
Oan ----- [1965]  
Aca TCGTTTATATGTACCCTGTAGAATCGAATTTGTGTGAGCACCTCAA---TCACAAATTCG [2434]  
Pbi TCGTTTATATATACCCTGTAGAACCGAATTTGTGTGAGCACCTCTA---TTGCAAATTCG [2523]  
Cpi TCGTCTATATGTACCCTGTAGAATCGAATTTGTGTGAATATTTGAGAG--TCACAAATTCG [2608]  
Cmy TCGTCTATATGTACCCTGTAGAATCGAATTTGTGTGAATATTTGAGAG--TCACAAATTCG [2607]  
Psi TCGTCTATATGGACCCTGTAGAATCGAATTTGTGTGAATATCT--GAG--TCACAAATTCG [2443]  
Asp TCGTCTATATGGACCCTGTAGAATCGAATTTGTGTGAATATCT--GAG--TCACAAATTCG [2443]  
Ami TCGCCTATATGTACCCTGTAGAATCGAATTTGTGTGAACATTTTCAGAG--TCACAAATTCG [2606]  
Asi TCGCCTATATGTACCCTGTAGAATCGAATTTGTGTGAACATTTTCAGAG--TCACAAATTCG [2523]  
Tgu ----- [1806]  
Cli TCTCCTATATGTACCCTGTAGACTCGAATTTGTGTGAGCGTCTCCAG--TCACAAATTCG [2375]  
Gga ----- [2231]  
Xtr GCGCTTATATGCACCCTGTAGAATCGAATTTGTGTGAG---TTCTGAA--CCACAGATTCG [2114]  
Lch TCGTCTATATATACCCTGTAGAACCGAATTTGTGTGAGCTCTCGATAA--TCACAAATTCG [2456]  
Dre TCGTCTATATGTACCCTGTAGAACCGAATTTGTGTCCAAAACATCAAAAATCGCAAATACG [2611]

Hsa -----CCTGTTGCCACAAACCCGTAGATCCGAACTTGTG [2332]  
Mmu -----CCTGTTGCCACAAACCCGTAGATCCGAACTTGTG [2335]

Mdo -----CCTGTTGCCACAAACCCGTAGATCCGAACCTTGTG [2192]  
Meu -----CCTGTTGCCACAAACCCGTAGATCCGAACCTTGTG [1688]  
Oan -----CCTGTTGCCACAAACCCGTAGATCCGAACCTTGTG [1999]  
Aca TCTCTAGGGGAGTATATGGACGAT--CTAGTTGCCACAAACCCGTAGATCCGAACCTTGTG [2492]  
Pbi TCTCTAGGGGAGTATATGGACGAT--CCAGTTGCCACAAACCCGTAGATCCGAACCTTGTG [2581]  
Cpi TCTCTAGGGGAGTATATGGACGAT--CCCCTGCCACAAACCCGTAGATCCGAACCTTGTG [2666]  
Cmy TCTCTAGGGGAGTATATGGACGAT--CCCCTGCCACAAACCCGTAGATCCGAACCTTGTG [2665]  
Psi TCTCTAGGGGAGTATATGGACGAT--CCCCTGCCACAAACCCGTAGATCCGAACCTTGTG [2501]  
Asp TCTCTAGGGGAGTATATGGACGAT--CCCCTGCCACAAACCCGTAGATCCGAACCTTGTG [2501]  
Ami TCTCTAGGGGAATATATGGACGAT--CCCCTGCCACAAACCCGTAGATCCGAACCTTGTG [2664]  
Asi TCTCTAGGGGAATATATGGACGAT--CCCCTGCCACAAACCCGTAGATCCGAACCTTGTG [2581]  
Tgu -----CCTGCTGCCACAAACCCGTAGATCCGAACCTTGTG [1840]  
Cli TCTCTAGGGGAATATATGGGCGAT--CCTGTTGCCACAAACCCGTAGATCCGAACCTTGTG [2433]  
Gga -----CCTGTTGCCACAAACCCGTAGATCCGAACCTTGTG [2265]  
Xtr TCTCTAGGGGGGTATATGGGTGAT----- [2138]  
Lch TCTCTAGGGGAGTATATGGTTCGAT--CCTGTTGCCACAAACCCGTAGATCCGAACCTTGTG [2514]  
Dre TCTCTACAGGAATACATGGGCGAC--CCTGCTGACACAAACCCGTAGATCCGAACCTTGTG [2669]

Hsa GTATTAGTCCGCACAAGCTTGTATCTATAGGTATGTGTCTGTTAGG--CCCATTGGCATA [2390]  
Mmu CTGATTCTGCACACAAGCTTGTGTCTATAGGTATGTGTCTGTTAGG--CCCATTGACATA [2393]  
Mdo GTGATATTCCACACAAGCTTGTGTCTATAGGTATGTGTCTGTCAGG----- [2238]  
Meu GTGATATTCCACACAAGCTTGTGTCTATAGGTATGTGTCTGTCAGG--CTAACTGGTACA [1746]  
Oan GTGATATTCCACACAAGCTTGTGTCTATAGGTATGTGTCTGTGGGC--CCAGTTGGCATA [2057]  
Aca CTTCTATGTTACACAAGCTTGTGTCTATAGGTATGTGTCTGCTTGG--CCAATTGGCATA [2550]  
Pbi CTCCTATCTACACAAGCTTGTATCTATAGGTATGTGTCTGCTTGG--CCAATTGGCATA [2639]  
Cpi GTCATATTCCACACAAGCTTGTATCTATAGGTATGTGTCTGCATGG--CCAATTGGCATA [2724]  
Cmy GTCATATTCCACACAAGCTTGTATCTATAGGTATGTGTCTGCATGG--CCAATTGGCATA [2723]  
Psi GTCATATTCCACACAAGCTTGTATCTATAGGTATGTGTCTGCATGG--CCAATTGGCATA [2559]  
Asp GTCATATTCCACACAAGCTTGTATCTATAGGTATGTGTCTGCATGG--CCAATTGGCATA [2559]  
Ami GTGATATTCCACACAAGCTTGTATCTATAGGTATGTGTCTTCATGG--CCAGTTGGCATA [2722]  
Asi GTGATATTCCACACAAGCTTGTATCTATAGGTATGTGTCTTCATGG--CCAGTTGGCATA [2639]  
Tgu CTCATATTCCACACAAGCTTGTATCTATAGGTCTGTGGCTGGCTGG--CCAATTGGCATA [1898]  
Cli GTCATATTCCACACAAGCTTGTATCTATAGGTATGTGTCTGTCTGG--CCAATTGGCATA [2491]  
Gga GTCATATTCCACACAAGCTTGTATCTATAGGTATGTGTCTGTCTGG--CCAATTGGCATA [2323]  
Xtr -----CCTACTAACATA [2150]  
Lch ATCAGATCCACACAAGCTCGTATCTATAGGTATGTGTCTACATGG--CCAATTGGCATA [2572]  
Dre GTGACTGTCCACACAAGCTTGTATCTATAGGTATCTGTCTGTGTGG--CCACTTGTTCATT [2727]

Hsa AACCCGTAGATCCGATCTTGTGGTGAAGTGGACCGCACAAAGCTCGCTTCTATGGGTCTGT [2450]  
Mmu AACCCGTAGATCCGATCTTGTGGTGAAGTGGACCGCGCAAGCTCGTTTCTATGGGTCTGT [2453]  
Mdo ----- [2238]  
Meu AACCCGTAGATCCGATCTTGTGGTGAAGTGAAGTGCACAAGCTCGCTTCTTGGGTCTGT [1806]  
Oan AACCCGTAGATCCGATCTTGTGGTGAAGTGAAGTGCACAAGCTCGCTTCTTGGGTCTGT [2117]  
Aca AACCCGTAGATCCGATCTTGTGGTGAAGTATAATGCACAAGCTCGCTTCTATGGGTCTGT [2610]  
Pbi AACCCGTAGATCCGATCTTGTGGTGAAGTATAAGTGCACAAGCTCGTTTCTATGGGTCTGT [2699]  
Cpi AACCCGTAGATCCGATCTTGTGGTAAAGTATAACTGCACAAGCTCGCTTCTATGGGTCTGT [2784]  
Cmy AACCCGTAGATCCGATCTTGTGGTAAAGTATAACTGCACAAGCTCGCTTCTATGGGTCTGT [2783]  
Psi AACCCGTAGATCCGATCTTGTGGTAAAGTACATTGCACAAGCTCGCTTCTATGGGTCTGT [2619]  
Asp AACCCGTAGATCCGATCTTGTGGTAAAGTACATTGCACAAGCTCGCTTCTATGGGTCTGT [2619]  
Ami AACCCGTAGATCCGATCTTGTGGTAAAATACACCACACAAGCTCGCTTCTATGGGTCTGT [2782]  
Asi AACCCGTAGATCCGATCTTGTGGTAAAATACACCACACAAGCTCGCTTCTATGGGTCTGT [2699]  
Tgu AACCCGTAGATCCGATCTTGTGTTGAAACGCACTGCACAAGCTCGCTTCTATGGGTCTGT [1958]  
Cli AACCCGTAGATCCGATCTTGTGTTGAAACGCACTGCACAAGCTCGCTTCTATGGGTCTGT [2551]  
Gga AACCCGTAGATCCGATCTTGTGTTGAAATGCACACTGCACAAGCTCGCTTCTATGGGTCTGT [2383]  
Xtr AACCCGTAGATCCGATCTTGTGGTGAATTCCTTTGCTCAAGCTCGTTTCTATGGGTCTGT [2210]  
Lch AACCCGTAGATCCGATCTTGTGATAAAA-TGTAAGTGCACAAGCTCGCTTCTATGGGTCTGT [2631]  
Dre AACCCGTAGATCCGATCTTGTGATAAGTTTGATGGCACAAGCTCGATTCTATGGGTCTCT [2787]

Hsa GTCAGTGTG--GGTCCTGGCACCCACCCGTAGAACCGACCTTGCAGGGCCTTCGCCGCAC [2508]  
Mmu GGCAGTGTG--GGTCCTGGCACCCACCCGTAGAACCGACCTTGCAGGGCCTTCGCCGCAC [2511]  
Mdo ----- [2238]  
Meu GTCAGTGTG--CAGCCTGGCACCCACCCGTAGATCCGACCTTGCAGGGCCTTCGCCGCAC [1864]  
Oan GTCAGTGTG----- [2126]  
Aca GTCCCTATG--CCAGTTGCCATAAAACCCGTAGATCCGAACCTTGCAGGTACAACCTGATTCAC [2668]  
Pbi GTCAGTCTG--CCGGTTGCCATAAAACCCGTAGATCCGAACCTTGCAGGTACGACTGCCTCAC [2757]  
Cpi GTCAGTCTG--CCGGTTGCCATAAAACCCGTAGATCCGAACCTTGCAGGTACGACTGCCTCAC [2842]  
Cmy GTCATTCTG--CCGGTTGCCATAAAACCCGTAGATCCGAACCTTGCAGGTACGACTGCCTCAC [2841]  
Psi GTCAGTCTG--CCGGTTGCCATAAAACCCGTAGATCCGAACCTTGCAGGTACGACTGCCTCAC [2677]  
Asp GTCAGTCTG--CCGGTTGCCATAAAACCCGTAGATCCGAACCTTGCAGGTACGACTGCCTCAC [2677]  
Ami GTCAGTGTG--CCGGTGCACATAAAACCCGTAGATCCGAACCTTGCAGGT-CG-CT-CCTCGT [2837]  
Asi GTCAGTGTG--CCGGTGCACATAAAACCCGTAGATCCGAACCTTGCAGGT-CG-CT-CCTCGT [2754]  
Tgu GTCAGTGTG----- [1967]  
Cli GTCAGTATG----- [2560]  
Gga GTCAGTATG----- [2392]  
Xtr GTCATTATG--CTGGTTGCCATAAAACCCGTAGATCCGAACCTTGTGCTGTGCC--CCTCTC [2266]  
Lch GCCAGTGTG--CCGGTTGCCACAAAACCCGTAGAGCCGAACCTTGTGGTGAAGC--TCGTTC [2687]  
Dre GTCTCTGTG----- [2796]

Hsa ACAAGCTCGTGTCTGTGGGTCCGTGTGCGGGGCT--TGCCAGTCTCTAGGTCCCTGAGAC [2566]  
Mmu ACAAGCTCGTGTCTGTGGGTCCGTGTGCGGGGCT--TGCCGGCCTCTGGGTCCCTGAGAC [2569]  
Mdo ----- [2238]  
Meu ACAAGCTCGAGTCTGTGGGTCTGTGTGCGGGATTG----- [1898]  
Oan ----- [2126]  
Aca ACAAGCTCGAGTCTGTGGGTATGTGTGCGACCTCG--GGGCATCTTCTCTGTCCCTGAGAC [2726]  
Pbi ACAAGCTCGAGTCTGTGGGTATGTGTGCGACCTTG--TGCCATCTTCTCTGTCCCTGAGAC [2815]  
Cpi ACAAGCTCGAGTCTGTGGGTATGTGTGCGATCCTG--GGCAGCCGTCTCTGTCCCTGAGAC [2900]  
Cmy ACAAGCTCGAGTCTGTGGGTATGTGTGCGATCCTG--GGCAGCCGTCTCTGTCCCTGAGAC [2899]  
Psi ACAAGCTCGAGTCTGTGGGTATGTGTGCGATCCTG--GGCAGCCGGCTCTGTCCCTGAGAC [2735]  
Asp ACAAGCTCGAGTCTGTGGGTATGTGTGCGATCCTG----- [2711]  
Ami GCAAGCTCGACTCTGTGGGTCTGTGTGCGGCCTCG--GGCCTCCCTCTCGGTCCCTGAGAC [2895]  
Asi GCAAGCTCGACTCTGTGGGTCTGTGTGCGGCCTCG--GGCCTCCCTCTCGGTCCCTGAGAC [2812]  
Tgu ----- [1967]  
Cli ----- [2560]  
Gga ----- [2392]  
Xtr ACAAGCTCGAGTGTGCGGGTCTGTGTGCGGCTTGG--GGTGTGATGTTCTGTCCCTGAGAC [2324]  
Lch ACAAGCTCGTGTCTAGGGGTCTGTGTGCGGCTTGG--AGCATGCTTCGCTGTCCCTGAGAC [2745]  
Dre -----AGTATGTCTCTTTGTCCCTGAGAC [2820]

Hsa CCTTTAACCTGTGAGGA-CATCCAGGG-TCACAGGTGAGGTTCCTTGGGAGCCTGGCGTCT [2624]  
Mmu CCTTTAACCTGTGAGGA-CGTCCAGGG-TCACAGGTGAGGTTCCTTGGGAGCCTGGCGCCT [2627]  
Mdo ----- [2238]  
Meu ----- [1898]  
Oan ----- [2126]  
Aca CCTT-AACCTGTGAGGA-AGCCCAGAGGTTCACAGGTGAGGTTCCTTGGGAACCTGAGCGGAG [2784]  
Pbi CCTT-AACCTGTGAGGA-AGCCCAGAGGTTCACAGGTGAGGGCCTTGGGAACCTGAGTGGGT [2873]  
Cpi CCTT-AACCTGTGAGGGCAGCGCAGAAATTCACAGGTGAGGTTCCTTGGGAACCGAGCGACT [2959]  
Cmy CCTT-AACCTGTGAGGGCAGCGCAGAAATTCACAGGTGAGGTTCCTTGGGAACCTGAGCGACT [2958]  
Psi CCTT-AACCTGTGAGGGCAGCGCAGAGTTCACAGGTGAGGTTCCTTGGGAGCTGAGCGACT [2794]  
Asp ----- [2711]  
Ami CCTT-ATCCTGTGAGGG-AGCCCAGAGCTTCACAGGTGAGG-CCTTGGGAACCTGGGCGGGT [2952]  
Asi CCTT-ATCCTGTGAGGG-AGCCCAGAGCTTCACAGGTGAGG-CCTTGGGAACCTGGGCGGGC [2869]  
Tgu ----- [1967]  
Cli ----- [2560]  
Gga ----- [2392]

Xtr CCTT-AACCTGTGAGGA--AGACATATGTCACAGGTGAGGTTCTGAGGAGCTGGACGCCA [2381]  
Lch CCTT-AACCTGTGAGGA---CATCAAGGTACAGGTGAGGTTCTTGGGAAGCTGTGTGGCA [2801]  
Dre CCTT-AACCTGTGAGGT--CAAAGTACAGGTGAGGTCCTCAGGAACAGGGCTGCA [2877]

Hsa GGCC--TGCGCTCCTCTCAGTCCCTGAGACCCTAACTTGTGATGTTTACCGTTTAAA-TC [2681]  
Mmu GGCC--TGCGCTCCCCTCAGTCCCTGAGACCCTAACTTGTGATGTTTACCGTTTAAA-TC [2684]  
Mdo -----TGCGCCCCTCTCAATCCCTGAGACCCTAACTTGTGATGTTTACCGTTTAAA-TC [2291]  
Meu ----- [1898]  
Oan -----TGCGCCCCTCTCAATCCCTGAGACCCTAACTTGTGATGTTTCCCGTTTAAA-TC [2179]  
Aca AGCC--TGCGCCCCTCTCTGTCCCTGAGACCCTAACTTGTGACGTTTGTAGTTTTTAAAG-TC [2841]  
Pbi TGCC--TGCGCCCCTCTCTGTCCCTGAGACCCTAACTTGTGACGTTTGTGGTTTTCAAG-TC [2930]  
Cpi GGCC--TGCGCCCCTCTCAATCCCTGAGACCCTAACTTGTGATGTTTGTAGTTTTTAAA-TC [3016]  
Cmy GGCC--TGCGCCCCTCTCAATCCCTGAGACCCTAACTTGTGATGTTTGTAGTTTTTAAA-TC [3015]  
Psi GACC--TGCGCCCCTCTCAATCCCTGAGACCCTAACTTGTGATGTTTGTAGTTTTTAAA-TC [2851]  
Asp -----TGCGCCCCTCTCAATCCCTGAGACCCTAACTTGTGATGTTTGTAGTTTTTAAA-TC [2764]  
Ami GGCC--TGCGCCCCTCTCAATCCCTGAGACCCTAACTTGTGATGTTTGTAGTTTTTAAA-TC [3009]  
Asi GGCC--TGCGCCCCTCTCAATCCCTGAGACCCTAACTTGTGATGTTTGTAGTTTTTAAA-TC [2926]  
Tgu -----TGCGCCCCTCTCAATCCCTGAGACCCTAACTTGTGATGTTTGTAGTTTTTAAA-TC [2020]  
Cli -----TGCGCCCCTCTCAATCCCTGAGACCCTAACTTGTGATGTTTGTAGTTTTTAAA-TC [2613]  
Gga -----TGCGCCCCTCTCAATCCCTGAGACCCTAACTTGTGATGTTTGTAGTTTTTAAA-TC [2445]  
Xtr TGCA--TGCACCCCTCTCAATCCCTGAGACCCTAACTTGTGATGTTTGTAGTTTTTAAAAATC [2439]  
Lch TGCA--TGCACCCCTCTCAATCCCTGAGACCCTAACTTGTGATGTTTGTAGTTTAAA-TC [2858]  
Dre TGCG--TGTGCCTCTCACAATCCCTGAGACCCTAACTTGTGACGTTTTCCTGTTATG-TG [2934]

Hsa CACGGTTAGGCTCTTGGGAGCTGCGAGTCGTGCT--GACTTTTCCTAGTCCCTGAGACC [2739]  
Mmu CACGGTTAGGCTCTTGGGAGCTGCGGGTCGTGCC--GACTTTGCCTAGTCCCTGAGACC [2742]  
Mdo CACGGTTAGGCTCTTGGGAGCTGTGAGTTGTGCC--GACTTTTCCTAGTCCCTGAGACC [2349]  
Meu -----GACTTTTCCTAGTCCCTGAGACC [1921]  
Oan CACGGTTAGGTTCTTGGGAGCTGTGAGTTGTGCC--GACTTTTCCTAGTCCCTGAGACC [2237]  
Aca CACGGTTAGGCTCTTGGGAGCTGTGAGTTGTGCC--GACTTTTCCTAGTCCCTGAGACC [2899]  
Pbi CACGGTTAGGCTCTCGGGAGCTGTGAGTTGTGCC--GACTTTTCCTAGTCCCTGAGACC [2988]  
Cpi CACGGTTAGGCTCTTGGGAGCTGTGAGTTGTGCT--GACTTTTCCTAGTCCCTGAGACC [3074]  
Cmy CACGGTTAGGCTCTTGGGAGCTGTGAGTTGTGCT--GACTTTTCCTAGTCCCTGAGACC [3073]  
Psi CACGGTTAGGCTCTTGGGAGCTGTGAGTTGTGCT--GACTTTTCCTAGTCCCTGAGACC [2909]  
Asp CACGGTTAGGCTCTTGGGAGCTGTGAGTTGTGCT--GACTTTTCCTAGTCCCTGAGACC [2822]  
Ami CACGGTTAGGCTCTTGGGAGCTGTGAGTTGTGCT--GACTTTTCCTAGTCCCTGAGACC [3067]  
Asi CACGGTTAGGCTCTTGGGAGCTGTGAGTTGTGCT--GACTTTTCCTAGTCCCTGAGACC [2984]  
Tgu CACGGTTAGGCTCTTGGGAGCTGTGAGTTGTGCT--TACTTTTCCTAGTCCCTGAGACC [2078]  
Cli CACGGTTAGGCTCTTGGGAGCTGTGAGTTGTGCT--GACTTTTCCTAGTCCCTGAGACC [2671]  
Gga CACGGTTAGGCTCTTGGGAGCTGTGAGTTGTGCT--GACTTTTCCTAGTCCCTGAGACC [2503]  
Xtr CACGGTTAGGCTCTTGGGAGCTGTGAGTTGTGCT--GACTTTTCCTAGTCCCTGAGACC [2497]  
Lch CACGGTTAGGCTCTTGGGAGCTGTGAGTTGTGCC--AACTTCTCCTAGTCCCTGAGACC [2916]  
Dre CACGGTTAGGTTCTTGGGAGCTGAGAGGGGTGCT--CACTCCTCCTGGTCCCTGAGACC [2992]

Hsa CTAACTTGTGAGG-TATTTTGTAGTAACA-TCACAAGTCAGGCTCTTGGGACCTAGGCGGAG [2797]  
Mmu CTAACTTGTGAGG-TATTTTGTAGTAACA-TCACAAGTCAGGTTCTTGGGACCTAGGCGGAG [2800]  
Mdo CTAACTTGTGAGG-CTTTTTCAGCGACAACCACAGGTCAGGCTCTTGGGACCTAGGCGGAG [2408]  
Meu CTAACTTGTGAGG-TTTTTTGTAGCAACAATCACAGGTCAGGTTCTTGGGACCTAGGCGGAG [1980]  
Oan CTAACTTGTGAGG-TTTTTTGTAGCAACAATCACAGGTCAGGCTCTTGGGACCTAGGCGGAG [2296]  
Aca CTAACTTGTGAGG-TTTTT-TAGTAACAATCACAGGTCAGGCTCTTGGGACCTAGGCGGAG [2957]  
Pbi CTAACTTGTGAGG-TTTTTTGTAGTAACAATCACAGGTCAGGCTCTTGGGACCTAGGCGGAG [3047]  
Cpi CTAACTTGTGAGG-TTTTTTGTAGCAACAATCACAGGTCAGGCTCTTGGGACCTAGGCGGAG [3133]  
Cmy CTAACTTGTGAGG-TTTTTTGTAGCAACAATCACAGGTCAGGCTCTTGGGACCTAGGCGGAG [3132]  
Psi CTAACTTGTGAGG-TTTTTTGTAGCAACAATCACAGGTCAGGCTCTTGGGACCTAGGCGGAG [2968]  
Asp CTAACTTGTGAGG-TTTTTTGTAGCAACAATCACAGGTCAGGCTCTTGGGACCTAGGCGGAG [2881]  
Ami CTAACTTGTGAGG-TTTTTTGTAGCAACAATCACAGGTCAGGCTCTTGGGACCTAGGCGGAG [3126]  
Asi CTAACTTGTGAGG-TTTTTTGTAGCAACAATCACAGGTCAGGCTCTTGGGACCTAGGCGGAG [3043]



Tgu CTAAC TTGTGAGG-TTTTTTAGCAACAATCACAAGTCAGGCTCTTGGGACCTAGGCGGAG [2137]  
Cli CTAAC TTGTGAGG-TTTTTTAGCAACAATCACAAGTCAGGCTCTTGGGACCTAGGCGGAG [2730]  
Gga CTAAC TTGTGAGG-TTTTGTAGCAACAATCACAAGTCAGGCTCTTGGGACCTAGGCGGAG [2562]  
Xtr CTAAC TTGTGAGGATTTTTTAGCAACAATCACAAGTTAGGCTCTTGGGACCTAGGCGGAG [2557]  
Lch CTAAC TTGTGAGC-TCTTTGCATTAATGTCACGGGTTAGGCTCTTGGGACCTAGGCGGAG [2975]  
Dre CTAAC TTGTGAGCTTTGTGTGCTAAAAATCACAGGTTAAGCTCTTGGGACCTGGGCAGAG [3052]

Hsa GG--TGGAGTAAAGTAGCAGCACATAATGGTTTGTGGATTTT-GAAAAGG--TGCAGGCC [2852]  
Mmu GG--TGGAGTAAAGTAGCAGCACATAATGGTTTGTGGATGTT-GAAAAGG--TGCAGGCC [2855]  
Mdo GG--TGGGGTAAAGTAGCAGCACATAATGGTTTGTGGTTTT-GAAAAGG--TGCAGGCC [2463]  
Meu GG--TGGGGTAAAGTAGCAGCACATAATGGTTTGTGGTTTT-GAAAAGG--TGCAGGCC [2035]  
Oan TG--TGGGGTAAAGTAGCAGCACATAATGGTTTGTGAGTTTT-GAAA-----TACAGGCC [2348]  
Aca GG----- [2959]  
Pbi GG----- [3049]  
Cpi GG--TGGGCTAACGTAGCAGCACATAATGGTTTGTGGTTTT-GAAAAGG--TGCAGGCC [3188]  
Cmy GG--TGGGCTAACGTAGCAGCACATAATGGTTTGTGGTTTT-GAAAAGG--TGCAGGCC [3187]  
Psi GG--TGGGCTAACGTAGCAGCACATAATGGTTTGTGGTTTT-GAAAAGG--TGCAGGCC [3023]  
Asp GG--TGGGCTAACGTAGCAGCACATAATGGTTTGTGGTTTT-GAAAAGG--TGCAGGCC [2936]  
Ami GG--TGGCCTAACGTAGCAGCACATAATGGTTTGTGGATTTT-GAAAAGG--TGCAGGCC [3181]  
Asi GG--TGGCCTAACGTAGCAGCACATAATGGTTTGTGGATTTT-GAAAAGG--TGCAGGCC [3098]  
Tgu GG--TGGCATAACGTAGCAGCACATAATGGTTTGTGGTTTT-GAAAAGG--TGCAGGCC [2192]  
Cli GG--TGGCATAACGTAGCAGCACATAATGGTTTGTGGTTTT-GAAAAGG--TGCAGGCC [2785]  
Gga GG--TGGCATAACGTAGCAGCACATAATGGTTTGTGGTTTT-GAAAAGG--TGCAGGCC [2617]  
Xtr GG--TGACGTAAAGTAGCAGCACATAATGGTTTGTGGTTAC-ACAGAGG--TGCAGGCC [2612]  
Lch GA--TGGAGCACTGTAGCAGCACATAATGGTTTGTGAGTTAT-ATAGAATTATGCAGGCC [3032]  
Dre GG--GTCGGTACTGTAGCAGCACAGAATGGTTTGTGAGTTATAACGGGGG--TGCAGGCC [3108]

Hsa ATATTGTGCTGCCTCAAAAATAC--CCTTAAAGTACTGTAG-CAGCACATCATGGTTTAC [2909]  
Mmu ATACTGTGCTGCCTCAAAA-TAC--CCTTAAAGTACTGTAG-CAGCACATCATGGTTTAC [2911]  
Mdo ATATTGTGCTGCCTCAAAAATAC--CCTTAAAGTACTATAGGCAGCACATCATGGTTTAC [2521]  
Meu ATATTGTGCTGCCTCAAAAATAC----- [2058]  
Oan ATATTGTGCTGCCTCAAAAATAC--CCTTGGACTGCTATAG-CAGCACATCATGGTTTGC [2405]  
Aca -----CCTTAAAGTACTCTAG-CAGCACATCATGATTTGT [2993]  
Pbi -----CCTCAAAGTACTATAG-CAGCACATCATGATTTGT [3083]  
Cpi ATATTGTGCTGCCTCAAAAATAC--CCTTAAATTACTCTAG-CAGCACATCATGGTTTGC [3245]  
Cmy ATATTGTGCTGCCTCAAAAATGC--CCTTAAAGTACTCTAG-CAGCACATCATGGTTTGC [3244]  
Psi ATATTGTGCTGCCTCAAAAATAC--CCTTAAAGTACTCTAG-CAGCACATCATGGTTTGC [3080]  
Asp ATATTGTGCTGCCTCAAAAATAC--CCTTAAAGTACTCTAG-CAGCACATCATGGTTTGC [2993]  
Ami ATATTGTGCTGCCTCAAAAATAC--CCTTAAATTACTCTAG-CAGCACATCATGGTTTGC [3238]  
Asi ATATTGTGCTGCCTCAAAAATAC--CCTTAAATTACTCTAG-CAGCACATCATGGTTTGC [3155]  
Tgu ATATTGTGCTGCCTCAAAAATAC--CCTCGAAGTGTGTAG-CAGCACATCATGGTTTGC [2249]  
Cli ATATTGTGCTGCCTCAAAAATAC--CCTTAAAGTACTCTAG-CAGCACATCATGGTTTGC [2842]  
Gga ATATTGTGCTGCCTCAAAAATAC--CCTTAAAGTACTCTAG-CAGCACATCATGGTTTGC [2674]  
Xtr ATACTGTGCTGCCGCCAAAACAC--TCCTAAAGAAGTGTAG-CAGCACATCATGATTTGC [2669]  
Lch ATGTTGTGCTGCTGCAAAAATAC--CCTTAAAGTGTGTAG-CAGCACATCATGGTTTGC [3089]  
Dre G TACTGTGCTGCGGCAACAACGA--CCTTAGACCGCTAAAG-CAGCGGTCATGGTTTTC [3165]

Hsa ATGCTACAGTCAAGATGCGAATCATTATTTGCTGCTCTAGAAATTTAAG----- [2958]  
Mmu ATACTACAGTCAAGATGCGAATCATTATTTGCTGCTCTAGAAATTTAAG----- [2960]  
Mdo ATGGTGGGAGCGCGCTGCGAATCATTATTTGCTGCTTTAGAAATTTAAG--CTTTAGGAG [2579]  
Meu -----CTTTAGGAG [2067]  
Oan ATGGTATAGCCAAGATGCGAATCATTATTTGCTGCTTTAGAAATTTAAG--CTTGAGGGG [2463]  
Aca ATGTCATAGTAAATATGCAAGTCAATTATTTGCTGCTTTAGAATTTTAAA--CCGGAGGTG [3051]  
Pbi GTTTCATAATAAATATGCAAGTCAATTATTTGCTGCTTTAGAATTTTAAAG--CTTGAGGTG [3141]  
Cpi ATGATCTTGTAAAGATGCTAATCATTATTTGCTGCTTTAGGAATTTAAG--TTTGAGGAG [3303]  
Cmy ATGCTCTAGCAAAAATGCGAATCATTATTTGCTGCTTTGAAATTTAAG--TTTGAGGAG [3302]  
Psi ATGCTTTAGCAAAAATGCGAATCATTATTTGCTGCTTTGAAATTTAAG--TTTGAGGAG [3138]

Asp ATGCTCTAGCAAAAATGCGAATCATTATTTGCTGCTTTGGAAATTTAAG--TTTGAGGAG [3051]  
Ami ATGATCTTGTAAGAGATGCTAATCATTATTTGCTGCTTTAGGAATTTAAG--TTTGAGGAG [3296]  
Asi ATGATCTTGTAAGAGATGCTAATCATTATTTGCTGCTTTAGGAATTTAAG--TTTGAGGAG [3213]  
Tgu ATGCTCTGCTCAGGGTGCAAATCATGATTTGCTGCTGTAGGAATTGAAG--TTTGAGGAG [2307]  
Cli ATGCTCTAATAAAGATGCGAATCATTATTTGCTGCTTTAGAAAATTTAAG--TTTGAGGAG [2900]  
Gga ATGCTGTAGTGAAGATGCGAATCATTATTTGCTGCTTTAGAAAATTTAAG--TTTGAGGAG [2732]  
Xtr ATGCTGTATTATAGATTCTAATCATTTTTTGCTGCTTCATGATATTGGG--TTTGAGGTG [2727]  
Lch AACAC-TAGTTAAGATGCAAATCATTATTTGCTGCTTTAGAATTTTAGG--TTTGAGGAA [3146]  
Dre AACAC-TTAGAGAAGGTGCAAGCCATCATTGCTGCTCTAGAGTTTTAAG----- [3213]

Hsa ----- [2958]  
Mmu ----- [2960]  
Mdo AA-ATAGCAGCAGCCATGGTTTTGTAGAGATA-CGGTGATACAAAACCATCGTGGGCTGTT [2637]  
Meu AA-ATAGCAGCAGCCATGGTTTTGTAGAGATA-AGGTGATGCAAACCATCGTGGGCTGTT [2125]  
Oan GTTGTAGCAGCACATCATGGTTTTGTAGGGACA-AGGAGATACAGACCATTCTGGGCTGCC [2522]  
Aca AT-GTAGCAGCACAAACATGGTTTTGTAGGGACACAGAAGATACAGACCATTCTGGGCTGCC [3110]  
Pbi GC-GTAGCAGCAGCACATGGTTTTGTAGAGAAA-AGAAGATACAGACCATTCTGGGCTGCC [3199]  
Cpi AT-GTAGCAGCACATCATGGTTTTGTAGGGACA-AGGAGATACAGACCATTCTGGGCTGCC [3361]  
Cmy AT-GTAGCAGCACATCATGGTTTTGTAGGGACA-AGGAGATACAGACCATTCTGGGCTGCC [3360]  
Psi AT-GTAGCAGCACATCATGGTTTTGTAGGGACA-AGGAGATACAGACCATGCTGGGCTGCC [3196]  
Asp AT-GTAGCAGCACATCATGGTTTTGTAGGGACA-AGGAGATACAGACCATGCTGGGCTGCC [3109]  
Ami AT-GTAGCAGCACATCATGGTTTTGTAGGGACA-AGGAGATACAGACCATTCTGGGCTGCC [3354]  
Asi AT-GTAGCAGCACATCATGGTTTTGTAGGGACA-AGGAGATACAGACCATTCTGGGCTGCC [3271]  
Tgu AT-GTAGCAGCACATCATGGTTTTGTAGGGACA-AGGAGATACAGACCATTCTGGGCTGCC [2365]  
Cli AT-GTAGCAGCACATCATGGTTTTGTAGGGACA-AGGAGATACAGACCATTCTGGGCTGCC [2958]  
Gga AT-GTAGCAGCACATCATGGTTTTGTAGGGACA-AGGAGATACAGACCATTCTGGGCTGCC [2790]  
Xtr AT-CTAGCAGCACATCATGGTTTTGTAGAAAACA-AGGAGATACAGACCATTCTGAGCTGCC [2785]  
Lch AT-GTAGCAGCACATCATGGTTTTGTAGGGATA-AGGAGATACAGACCATTCTGAGCTGCC [3204]  
Dre ----- [3213]

Hsa -----CCTGCTCCCGCCCCAGCAGCACACTGTGGTTTTGTACGGCACTGTG [3003]  
Mmu -----CCTGCCCGCCCCAGCAGCACACTGTGGTTTTGTACGGCACTGTG [3005]  
Mdo ACATTTTCCATAAA--CCTGCCTCCGCCCCAGCAGCACACTGTGGTTTTGTTTCAGTGTATG [2695]  
Meu ACATTTTCCATAAA--CCTGCCTCCGCCCCAGCAGCACACTGTGGTTTTGTTTCAGTGTGTG [2183]  
Oan TCAATCCCCCAAG----- [2535]  
Aca TCATTACCTTTTG----- [3123]  
Pbi TCATGACCTCAAG----- [3212]  
Cpi TCATTACCTCAAG----- [3374]  
Cmy TCATTACCTCAAG----- [3373]  
Psi TCATTACCTCAAG--CCAGCCTTCGCCCCAGCAGCACATCATGGTTTTGTCTGGAGCTCTG [3254]  
Asp TCATTACCTCAAG----- [3122]  
Ami TCATTACCTCAAG--CCAGCCC-CGCCCCAGCAGCACATCATGGTTTTGT-GGGGTCTCGT [3410]  
Asi TCATTACCTCAAG--CCAGCCC-CGCCCCAGCAGCACATCATGGTTTTGT-GGGGTCTCGT [3327]  
Tgu TCATTACCTCAAG----- [2378]  
Cli TCATTACCTCAAG----- [2971]  
Gga TCATTACCTCAAG----- [2803]  
Xtr TCTTGACCTCAGA----- [2798]  
Lch TCAGTTCCCCAAG----- [3217]  
Dre -----CCTGAGTGCCCTGTAGCAGCACATCATGGTTTTGTAAGTTATAAGG [3258]

Hsa GCCACGTCCAAACCACACTGTGGTGTTAGAGCGAGGGTG--CAGCAGTGCCTTAGCAGCA [3061]  
Mmu GCCACGTCCAAACCACACTGTGGTGTTAGAGCGAGGGTA--CAGCGGTGCCTTAGCAGCA [3063]  
Mdo GCCAAGTCCAAACCACACTGTGGTGTTAGAGCGAGGGTA--CAACAGTGCCTTAGCAGCA [2753]  
Meu GCCAAGTCCAAACCACACTGTGGTGTTAGAGTGAAGGGTA--CAACAGTGCCTTAGCAGCA [2241]  
Oan -----CAGCAGTACCTTAGCAGCA [2554]  
Aca ----- [3123]  
Pbi -----CAGTTGTGCCTTAGCAGCA [3231]

Cpi -----CAGCAGTACATTAGCAGCA [3393]  
Cmy -----CAGCAGTACATTAGCAGCA [3392]  
Psi AATGCA--CAAACCATTTTGTGATGTTACCGCGCGGGCC--CAACAGTACATTAGCAGCA [3310]  
Asp -----CAACAGTACATTAGCAGCA [3141]  
Ami GGCACA----GACCATGGCGTGGTGCTACCGCG-GGGCC--CAATCGTACCTTAGCAGCA [3463]  
Asi GGCACA----GACCATGGCGTGGTGCTACCGCG-GGGCC--CAATCGTACCTTAGCAGCA [3380]  
Tgu -----CTGTCATACTTTAGCAGCA [2397]  
Cli -----CTGTCATACTTTAGCAGCA [2990]  
Gga -----CTGTCATACTCTAGCAGCA [2822]  
Xtr -----CAGCAGTCCCTTAGCAGCA [2817]  
Lch -----CAGTGGTACCTTAGCAGCA [3236]  
Dre GCAAAATCCGAATCATGATGTGCTGTCCTGGGAGCCTG--CTGCCTGGCTGTAGCAGCA [3316]

Hsa CGTAAA-TATTGGCGTTAAGATTCTAAAATTATCTCCAGTATTAAGTGTGCTGCTGAAGT [3120]  
Mmu CGTAAA-TATTGGCGTTAAGATTCTGAAATTACCTCCAGTATTGACTGTGCTGCTGAAGT [3122]  
Mdo CGTAAA-TATTGGCGTTAAGATTTTAAAAGTATCTCCAGTATTAAGTGTGCTGCTGAAGT [2812]  
Meu CGTAAA-TATTGGCGTTAAGATTTTAAAAGTATCTCCAGTATTAAGTGTGCTGCTGAAGT [2300]  
Oan CGTAAA-TATTGGCGTTAAGACTCTAAAAGTATCTCCAGTATTGACTGTGCTGCTGAAGT [2613]  
Aca ----- [3123]  
Pbi CATAAA-TATTGGAGTTATTATTAGTAAAGTATCTCCAGTATCAATTGTGCTGCTGAAGT [3290]  
Cpi CGTAAA-TATTGGCGTTAACT--CTGTAAATATCTCCAGTATTAAGTGTGCTGCTGAAGT [3450]  
Cmy CGTAAA-TATTGGCGTTAACT--CTGTAAATATCTCCAGTATTAAGTGTGCTGCTGAAGT [3449]  
Psi CGTAAA-TATTGGTGTAACT--CTATAAATATCTCCAGTATTAAGTGTGCTGCTGAAGT [3367]  
Asp CGTAAA-TATTGGTGTAACT--CTATAAATATCTCCAGTATTAAGTGTGCTGCTGAAGT [3198]  
Ami CGTAAA-TATTGGTGTAAAGATTCTGTAAATATCTCCAGTATTAAGTGTGCTGCTGAAGT [3522]  
Asi CGTAAA-TATTGGTGTAAAGATTCTGTAAATATCTCCAGTATTAAGTGTGCTGCTGAAGT [3439]  
Tgu CGTAAA-TATTGGTGT--AAGA-CTGTAAATATCTCCAGTATTAAGTGTGCTGCTGAAGT [2454]  
Cli CGTAAA-TATTGGTGTAAAGA--CTGTAAATATCTCCAGTATTAAGTGTGCTGCTGAAGT [3047]  
Gga CGTAAA-TATTGGTGTAAAA--CTGTAAATATCTCCAGTATTAAGTGTGCTGCTGAAGT [2879]  
Xtr CGTAAA-TATTGGTGTAAAA--TGGTC-----CCAATATTAAGTGTGCTGCTAGAGT [2867]  
Lch CGTAAAATACTAGAGTTTAGTGTATGAATGCCTCCAGTATTGGTTCGTGCTGCTGAAGT [3296]  
Dre CGTAAA-TATTGGAGTCAAAGCACTTGCGAATCCTCCAGTATTGACCGTGTGCTGGAGT [3375]

Hsa AAGG--CTTGTTCCTACTCTAGCAGCACGTAAATATTGGCGTAGTGAAATATATATTAAC [3178]  
Mmu AAGG--CTTGTTCCTACTCTAGCAGCACGTAAATATTGGCGTAGTGAAATAAATATTAAC [3180]  
Mdo AAGG--CTTGTTCCTACTCTAGCAGCACGTAAATATTGGCGTAGTGAAATCAGTCTGAAAC [2870]  
Meu AAGG--CCTGCCCCGCTCTAGCAGCACGTAAATATTGGCGTCGTGAGATA-CTGGTGAAC [2357]  
Oan AAGG--CTTATTACGCTCTAGCAGCACGTAAATATTGGTGTAGTGAAG----TCTTAAAC [2667]  
Aca -----CTTGTTCCTGCCCCCTAGCAGCACGTAAATATTGGTGTAGTAAAGATAAATCTT-AAC [3176]  
Pbi AAGG--CTTGTTCCTGCCCCCTAGCAGCACGTAAATATTGGTGTAGTAAAGATAAATCTT-AAC [3347]  
Cpi AAAG--CTTGTTCCTGCCCCCTAGCAGCACGTAAATATTGGTGTATAAAAAGTAAATCA--AAC [3506]  
Cmy AAAG--CTTGTTCCTGCCCCCTAGCAGCACGTAAATATTGGTGTAGTAAAGTAAATATTAAC [3507]  
Psi AAAG--CTTGTTCCTGCCCCCTAGCAGCACGTAAATATTGGTGTAGTAAATGTAATCTT-AAC [3424]  
Asp AAAG--CTTGTTCCTGCCCCCTAGCAGCACGTAAATATTGGTGTAGTAAATGTAATCTT-AAC [3255]  
Ami AAGT--CTTGTTCCTGCCCCCTAGCAGCACGTAAATATTGGTGTATAAAAAGTAAATCA--AAC [3578]  
Asi AAGT--CTTGTTCCTGCCCCCTAGCAGCACGTAAATATTGGTGTATAAAAAGTAAATCA--AAC [3495]  
Tgu AAGG--CTCGTTCCTGCCCCCTAGCAGCACGTAAATATTGGAGTGTCAAAG-AAACCTTCAAC [2511]  
Cli AAGG--CTTGTTCCTGCCCCCTAGCAGCACGTAAATATTGGTGTAGTAAAAATAAACCTTAAAC [3105]  
Gga AAGG--CTTGTTCCTGCCCCCTAGCAGCACGTAAATATTGGTGTAGTAAAAATAAACCTTAAAC [2937]  
Xtr AAGG--ATTGCTCCGCATTAGCAGCACGTAAATATTGG-GTGATATGATATGGA----GC [2920]  
Lch AAGG--CCAGCTCCACTCTAGCAGCATGTAATATTGGTGTATAAAAAGATAGACTA-AAAC [3353]  
Dre TAGG--CCTTCCTCGCTTTAGCAGCACGTAAATATTGGTGTGTATAGTCAAGGC-CAAC [3432]

Hsa ACCAATATTAC-TGTGCTGCTTTAGTGTGACAGG----- [3211]  
Mmu ACCAATATTAT-TGTGCTGCTTTAGTGTGACAGG----- [3213]  
Mdo CCCAATATTAC-TGTGCTGCTTTAGTGTGGCAGG--TCGGCTGTGCCCTAGCAGCACGTC [2927]  
Meu CCCAATATTAT-TGTGCTGCTTTCAGCGTGGCAGG--TCGGCTGTGCCCTAGCAGCACGTC [2414]

Oan CCCAATATTAT-TGTGCTGCTTTAGCGTGATAGG--TCGGCCGTGCCCTAGCAGCACGTA [ 2724 ]  
Aca CCCAATATTGT-TGTGCTGCTTAAGCGTGGCAGG--TCCGCCCGGCTCTAGCAGCACGTA [ 3233 ]  
Pbi GCCAATATTAT-TGTGCTGCTTAAGCGTGACAGG--TCTGCTCTGCTTTAGCAGCACGTA [ 3404 ]  
Cpi CCCAATATTAT-TGTGCTGCTTAAGCGTGGCAGA--TCAGCAGTGCTCTAGCAGCACGTA [ 3563 ]  
Cmy CCCAATATTAT-TGTGCTGCTTAAGCGTGGCAGA--TCAGCAGTGCTCTAGCAGCACGTA [ 3564 ]  
Psi CCCAATATTAT-TGTGCTGCTTAAGCGTGGCAGA--TCAGCAGTGCTCTAGCAGCACGTA [ 3481 ]  
Asp CCCAATATTAT-TGTGCTGCTTAAGCGTGGCAGA--TCAGCAGTGCTCTAGCAGCACGTA [ 3312 ]  
Ami CCCAATATTAT-TGTGCTGCTTAAGCGTGGCAGA--TCAGCAGTGCTCTAGCAGCACGTA [ 3635 ]  
Asi CCCAATATTAT-TGTGCTGCTTAAGCGTGGCAGA--TCAGCAGTGCTCTAGCAGCACGTA [ 3552 ]  
Tgu CCCAATATTAT-TGTGCTGCTTCAGCGTGGCAGA--TCAGCAGTGCTCTAGCAGCACGTA [ 2568 ]  
Cli CCCAATATTAT-TGTGCTGCTTAAGCGTGGCAGA--TCAGCAGTGCTCTAGCAGCACGTA [ 3162 ]  
Gga CCCAATATTAT-TGTGCTGCTTAAGCGTGGCAGA--TCAGCAGTGCTCTAGCAGCACGTA [ 2994 ]  
Xtr CCCAGTATTAT-TGTACTGCTTAAGTGTGGCAAG--GCAATCTTGCTTTAGCAGCACGTA [ 2977 ]  
Lch CCCAATGTTGT-TGTGCTGCTTCAGTGTGGCAGG--TCAGCAGTACTTTAGCAGCACGTA [ 3410 ]  
Dre CCCAATATTATGTGTGCTGCTTCAGTAAGGCAGG----- [ 3466 ]

Hsa ----- [ 3211 ]  
Mmu ----- [ 3213 ]  
Mdo AAAACTGGAGTCAAAA-----GTTCAATCCTCCAGTATTGCCTTGCTGCTTGAGTGAGG [ 2982 ]  
Meu AAAACTGGAGTTAACTG-----GTTAAATCCTCCAGTATTGCCTTGCTGCTTGAGCGAGG [ 2469 ]  
Oan AATACTGGAGTTTGGGGATGCCTCGTTGCTCTCCAGTATTGCATTGCTGCTTGAGCGAGG [ 2784 ]  
Aca AATACTGGAGTCTAGGATGATACATTTGCCCTCCAGTATTGCTTTGCTGCTTTAATCGGG [ 3293 ]  
Pbi AATACTGGAGTTTA-GATGCT----CTGCCCTCCAGTATTGCTTTGCTGCTTTAGTCAAG [ 3459 ]  
Cpi AATACTGGAGTCGAGGACTGCCTGGCTGCTCTCCAGTATTGCATTGCTGCTTGAGTGAGG [ 3623 ]  
Cmy AATACTGGAGTTTAGGATTGCCTAGCTGCTCTCCAGTATTGCATTGCTGCTTTAGTGAGG [ 3624 ]  
Psi AATACTGGAGTTTAGGATTGCCTAGCTGCTCTCCAGTATTGCGTTGCTGCTTTAGTGAGG [ 3541 ]  
Asp AATACTGGAGTTTAGGATTGCCTAGCTGCTCTCCAGTATTGCGTTGCTGCTTTAGTGAGG [ 3372 ]  
Ami AATACTGGAGTCGAGGACTGCCTGGCTGCTCTCCAGTATTGCATTGCTGCTTGAGTGAGG [ 3695 ]  
Asi AATACTGGAGTCGAGGACTGCCTGGCTGCTCTCCAGTATTGCATTGCTGCTTGAGTGAGG [ 3612 ]  
Tgu AATACTGGAGTTTGGGATTGCCT-GTTGCTCTCCAGTATTGCATTGCTGCTTTAGTGAGG [ 2627 ]  
Cli AATACTGGAGTTTAGGATTGCCTG-TTGCTCTCCAGTATTGCATTGCTGCTTTAGTGAGG [ 3221 ]  
Gga AATACTGGAGTGGGGATCGCCTG-TTGCTCTCCAGTATTGCATTGCTGCTTTAGTGAGG [ 3053 ]  
Xtr AATACTGGAGTTCATGACCATATCTGCACTCTCCAGTATTACTTTGCTGCTATATTAAGA [ 3037 ]  
Lch AATATTGGAGTTCAGA---ATTGCTGCTATCTCCAGTATTGCAATGCTGCTATTGTGAGG [ 3467 ]  
Dre ----- [ 3466 ]

Hsa -----GCTTCCCTGGCTCTAGCAGCACAGAAATATTGGCACAG-----GGAAGCGAGT [ 3259 ]  
Mmu -----ACTCTCCTGGCTCTAGCAGCACAGAAATATTGGCATGG-----GGAAGTGAGT [ 3261 ]  
Mdo CAGG--GCTTCCCTGGCTTTAGCAGCACAAAAATATTGGCACCTG-----AGGGAAAGCC [ 3035 ]  
Meu TAGG--GCCCCCTGGCTTTAGCAGCACAGAAATATTGGCACCTG-----AGGGAAAACC [ 2522 ]  
Oan CCGG----- [ 2788 ]  
Aca TTTG--GCCGGTCCCCTCCAGCAGCACTTCAATATTGGCAGTGTCC--ACCCCTCCGG [ 3349 ]  
Pbi CTGG----- [ 3463 ]  
Cpi CTGG----- [ 3627 ]  
Cmy CTGG----- [ 3628 ]  
Psi CTGG--GCCTGTCCCCTCCAGCAGCACATAAAATATTGGCAGCGTCCCTGGGCATGCCTGC [ 3599 ]  
Asp CTGG--GCCTGTCCCCTCCAGCAGCACATAAAATATTGGCAGCGTCCCTGGGCATGCCTGC [ 3430 ]  
Ami CTGG----- [ 3699 ]  
Asi CTGG----- [ 3616 ]  
Tgu CTGG----- [ 2631 ]  
Cli CTGG----- [ 3225 ]  
Gga CTGG----- [ 3057 ]  
Xtr TTGC----- [ 3041 ]  
Lch CTGT----- [ 3471 ]  
Dre -----GTGTGCTGACAGAAGCAGCACATCAATATTGGCAGCTGCC--CTCTCTCTGGG [ 3518 ]

Hsa CTGCCAATATTGGCT-GTGCTGCTCCAGGCAGGGTGGT--GAATAATGTCAAAGTGCTTTA [ 3316 ]

Mmu CTGCCAATATTGGCT-GTGCTGCTCCAGGCAGGGTGGT--GAATAATGTCAAAGTGCTTA [3318]  
Mdo ATGCCAGTATTGAGA-GTGCTGCTCTAGACAGGGTAGC--GAATAATGTCAAAGTGCTTA [3092]  
Meu ATGCCAGTATTGA---GTGCTGCTCCAGACAGGGTGGC--GAATAATGTCAAAGTGCTTA [2577]  
Oan -----GAATAATGTCAAAGTGCTTA [2808]  
Aca CCGCCAGTATTGCCT-GTGCTGCTCCAGGGGGGCTCGG--GAGTAATGTCAAAGTGCTTA [3406]  
Pbi -----GAATAATGTCAAAGTGCTTA [3483]  
Cpi -----GAGTAATGTCAAAGTGCTTA [3647]  
Cmy -----GGGTAATGTCAAAGTGCTTA [3648]  
Psi CTGCCAGTATTTTCTTGTGCTGCTCCAGCGGGGCGGG--GAGTAATGTCAAAGTGCTTA [3657]  
Asp CTGCCAGTATTTTCTTGTGCTGCTCCAGCGGGGCGGG--GAGTAATGTCAAAGTGCTTA [3488]  
Ami -----GAGTAATGTCAAAGTGCTTA [3719]  
Asi -----GAGTAATGTCAAAGTGCTTA [3636]  
Tgu -----GAGTAATGTCAAAGTGCTTA [2651]  
Cli -----GAGTAATGTCAAAGTGCTTA [3245]  
Gga -----GAGTAATGTCAAAGTGCTTA [3077]  
Xtr -----GAGTAATGTCAAAGTGCTTA [3061]  
Lch -----AAGTAATGACAAAGTGCTTA [3491]  
Dre TTGCCAGTATGGTTT-GTGCTGCTCCCGTCAGACAGAC--ATGTATTGTCAAAGTGCTTA [3575]

Hsa CAGTGCAGGTAGTGATATG-T-GC--ATCTACTGCAGTGAAGGCACCTTGTAGCATTATGG [3372]  
Mmu CAGTGCAGGTAGTGATGTG-T-GC--ATCTACTGCAGTGAAGGCACCTTGTAGCATTATGC [3374]  
Mdo CAGTGCAGGTAGTGATATG-TAGA--ATCTACTGCAGTGAAGGCACCTTGTAGCATTATAG [3149]  
Meu CAGTGCAGGTAGTGATATG-TAGA--ATCTACTGCAGTGAAGGCACCTTGTAGCATTATAG [2634]  
Oan CAGTGCAGGTAGTGGTATG-TAGA--ATCTACTGCAGTGAAGGCACCTTGTAGCATTATGT [2865]  
Aca CAGTGCAGGTAGTGATAAG-TAGA--ACCTACTGCAGTGAAGGCACCTTGTAGCATTATGC [3463]  
Pbi CAGTGCAGGTAGTGATTTA-TAGA--ACCTACTGCAGTGAAGGCACCTTGTAGCATTATGC [3540]  
Cpi CAGTGCAGGTAGTGATATA--AGA--ACCTACTGCAGTGAAGGCACCTTGTAGCATTATAG [3703]  
Cmy CAGTGCAGGTAGTGATATA--AGA--ACCTACTGCAGTGAAGGCACCTTGTAGCATTATAT [3704]  
Psi CAGTGCAGGTAGTGATATA--AGA--ATCTACTGCAGTGAAGGCACCTTGTAGCATTATAT [3713]  
Asp CAGTGCAGGTAGTGATATA--AGA--ATCTACTGCAGTGAAGGCACCTTGTAGCATTATAT [3544]  
Ami CAGTGCAGGTAGTGATATA-TAGA--ACCTACTGCAGTGAAGGCACCTTGTAGCATTATAG [3776]  
Asi CAGTGCAGGTAGTGATATA-TACA--ACCTACTGCAGTGAAGGCACCTTGTAGCATTATAG [3693]  
Tgu CAGTGCAGGTAGTGATATA-TAGA--ACCTACTGCAGTGAAGGCACCTTGTAGCATTATGT [2708]  
Cli CAGTGCAGGTAGTGATATA-TAGA--ACCTACTGCAGTGAAGGCACCTTGTAGCATTATGT [3302]  
Gga CAGTGCAGGTAGTGATATA-TAGA--ACCTACTGCAGTGAAGGCACCTTGTAGCATTATGT [3134]  
Xtr CAGTGCAGGTAGTGATTTAACAGA--ACCTACTGCAGTGAAGGCACCTTGTAGCATTATAT [3119]  
Lch CAGTGCAGGTAGTAATATG-TAGA--ACCTACTGCAGTGAAGGCACCTTGTAGCATTATAT [3548]  
Dre CAGTGCAGGTAGTATTATG-GAAT--ATCTACTGCAGTGGAGGCACCTTCTAGCAATACAC [3632]

Hsa T--CTTTTTGTTCTAAGGTGCATCTAGTGCAGATAGTGAAGTAGATTAGCATCTACTGCC [3430]  
Mmu T--CTTTTTGTTCTAAGGTGCATCTAGTGCAGATAGTGAAGTAGATTAGCATCTACTGCC [3432]  
Mdo T--CTTTTTGTTCTAAGGTGCATCTAGTGCAGATAGTGAAGTAGATTAGCATCTACTGCC [3207]  
Meu T--CTTTTTGTTCTAAGGTGCATCTAGTGCAGATAGTGAAGTAGATTAGCATCTACTGCC [2692]  
Oan T--CTTTTTGTTCTAAGGTGCATCTAGTGCAGATAGTGAAGTAGATTAGCATCTACTGCC [2923]  
Aca T--CTTTTTGTTCTAAGGTGCATCTAGTGCAGATAGTGAAGTAGACTAGCATCTACTGCC [3521]  
Pbi T--CTTTTTGTTCTAAGGTGCATCTAGTGCAGATAGTGAAGTAGATTAGCATCTACTGCC [3598]  
Cpi T--CTTTTTGTTCTAAGGTGCATCTAGTGCAGATAGTGAAGTAGATTAGCATCTACTGCC [3761]  
Cmy T--CTTTTTGTTCTAAGGTGCATCTAGTGCAGATAGTGAAGTAGATTAGCATCTACTGCC [3762]  
Psi T--CTTTTTGTTCTAAGGTGCATCTAGTGCAGATAGTGAAGTAGATTAGCATCTACTGCC [3771]  
Asp T--CTTTTTGTTCTAAGGTGCATCTAGTGCAGATAGTGAAGTAGATTAGCATCTACTGCC [3602]  
Ami T--CTTTTTGTTCTAAGGTGCATCTAGTGCAGATAGTGAAGTAGATTAGCATCTACTGCC [3834]  
Asi T--CTTTTTGTTCTAAGGTGCATCTAGTGCAGATAGTGAAGTAGATTAGCATCTACTGCC [3751]  
Tgu T--CTTTTTGTTCTAAGGTGCATCTAGTGCAGATAGTGAAGTAGATTAGCATCTACTGCC [2766]  
Cli T--CTTTTTGTTCTAAGGTGCATCTAGTGCAGATAGTGAAGTAGATTAGCATCTACTGCC [3360]  
Gga T--CTTTTTGTTCTAAGGTGCATCTAGTGCAGATAGTGAAGTAGATTAGCATCTACTGCC [3192]  
Xtr T--CTTTTTGTTCTAAGGTGCATCTAGTGCAGATAGTGAAGTAGATTAGCATCTACTGCC [3177]  
Lch T--CTTTTTGTTCTAAGGTGCATCTAGTGCAGATAGTGAAGTAGATTAGCATCTACTGCC [3606]

Dre T--GGCTTTGTGCTAAGGTGCATCTAGTGCAGATAGTGAAGTAGACTAGCACCTACTGCC [3690]

Hsa CTAAGTGCTCCTTCTGGCATAAGAAG--TCTGTAGCACTAAAAGTGCTTATAGTGCAGGTA [3488]  
Mmu CTAAGTGCTCCTTCTGGCATAAGAAG--TCTGTAGCACTAAAAGTGCTTATAGTGCAGGTA [3490]  
Mdo CTAAGTGCTCCTTCTGGCATAAGAAG--TTTGTAGCACTAAAAGTGCTTATAGTGCAGGTA [3265]  
Meu CTAAGTGCTCCTTCTGGCATAAGAAG--TTTGTAGCACTAAAAGTGCTTATAGTGCAGGTA [2750]  
Oan CTAAGTGCTCCTTCTGGCATAAGAAG--CTTGTAGCACTAAAAGTGCTTATAGTGCAGGCA [2981]  
Aca CTAAGTGCTCCTTCTGGCATAAGAAG--CCTGTAGCACTAAAAGTGCTTATAGTGCAGGTA [3579]  
Pbi CTAAGTGCTCCTTCTGGCATAAGAAG--CCTGTAGCACTAAAAGTGCTTATAGTGCAGGTA [3656]  
Cpi CTAAGTGCTCCTTCTGGCATAAGAAG--CCTGTAGTACTAAAAGTGCTTATAGTGCAGGTA [3819]  
Cmy CTAAGTGCTCCTTCTGGCATAAGAAG--TCTGTAGTACTAAAAGTGCTTATAGTGCAGGTA [3820]  
Psi CTAAGTGCTCCTTCTGGCATAAGAAG--TCAGTAGTACTAAAAGTGCTTATAGTGCAGGTA [3829]  
Asp CTAAGTGCTCCTTCTGGCATAAGAAG--CCAGTAGTACTAAAAGTGCTTATAGTGCAGGTA [3660]  
Ami CTAAGTGCTCCTTCTGGCATAAGAAG--CCTGTAGTACTAAAAGTGCTTATAGTGCAGGTA [3892]  
Asi CTAAGTGCTCCTTCTGGCATAAGAAG--CCTGTAGTACTAAAAGTGCTTATAGTGCAGGTA [3809]  
Tgu CTAAGTGCTCCTTCTGGCATAAGAAG--CTTGTAGCACTAAAAGTGCTTATAGTGCAGGTA [2824]  
Cli CTAAGTGCTCCTTCTGGCATAAGAAG--CTTGTAGCACTAAAAGTGCTTATAGTGCAGGTA [3418]  
Gga CTAAGTGCTCCTTCTGGCATAAGAAG--CTTGTAGCACTAAAAGTGCTTATAGTGCAGGTA [3250]  
Xtr CTAAGTGCTCCTTCTGGCATAAAAAAG--AAAGTGGTGCTAAAAGTGCTTATAGTGCAGGTA [3235]  
Lch CTAAGTGCTCCTTCTGGCATAAGAAG--TTAGCAGCGCTAAAAGTGCTTATAGTGCAGGTA [3664]  
Dre CTAAGTGCTCCTTCTGGCACGAGGGT--TCAGCAGTGCTAAAAGTGCTTATAGTGCAGGTA [3748]

Hsa GTGTTTA-GTTATCTACTGCATTATGAGCACTTAAAGTACTGCTAG--TTGGCCATGTAA [3545]  
Mmu GTGTGTA-GCCATCTACTGCATTACGAGCACTTAAAGTACTGCCAG--TTGGCCATGTCA [3547]  
Mdo GTGTTTA-GTTATCTACTGCATTATGAGCACTTGAAGTACTGCTAG--TCGGTTGTGTAA [3322]  
Meu GTGTTTA-GTTATCTACTGCATTATGAGCACTTGAAGTACTGCTAG--TCGGTTGTGTAA [2807]  
Oan ATGTTTA-GTCGTCTACTGCATTATGAGCACTTCAAGTCTGCAAG--TTGGTTGTGCAA [3038]  
Aca GTGATTA-ATAATCTACTGCATTACGAGCACTTAAAGTACTGCTAG--TCGG-GGTGCAA [3635]  
Pbi GTGTTTC-ATAATCTACTGCATTAGGAGCACTTAAAGTACTACTAG--TCGGTGGTGCAA [3713]  
Cpi GTGTTCA-GTAATCTACTGCATTATGAGCACTTAAAGTACTGCTAG--TGAGTTGTGCAA [3876]  
Cmy GTGTTCA-GTAATCTACTGCATTATGAGCACTTAAAGTACTGCTAG--TGAGTTGTGCAA [3877]  
Psi GTGTTCA-GTAATCTACTGCATTATGAGCACTTAAAGTACTGCTAG--TCAGTTGTGCAA [3886]  
Asp GTGTTCA-GTAATCTACTGCATTATGAGCACTTAAAGTACTGCTAG--TGAGTTGTGCAA [3717]  
Ami GTGTTCA-GGAATCTACTGCATTATGAGCACTTAAAGTACTGCTAG----- [3937]  
Asi GTGTTCA-GGAATCTACTGCATTATGAGCACTTAAAGTACTGCTAG--TGTGTTGTGTAA [3866]  
Tgu GTGTTCA-CTAATCTACTGCATTATAAGCACTTAAAGTACTGCTAG--CAAGTTGTGCAA [2881]  
Cli GTGTTCA-CTAATCTACTGCATTATAAGCACTTAAAGTACTGCTAG--TGAGTTGTGCAA [3475]  
Gga GTGTTCA-CTAATCTACTGCATTATAAGCACTTAAAGTACTGCTAG--TGAGTTGTGCAA [3307]  
Xtr GTTTTTCTGTATTCTACTGCATAATGAGCACTTAAAGTACTCCTAG--TGTAAACTGCAA [3293]  
Lch GTGTTTA-GTAATCTACTGCATTGTGAGCACTTAAAGTCTGCTAG--GGAGTTATGCAA [3721]  
Dre GTATTTCTGTCATCTACTGCAGTGTGAGCACTTGAAGTACTTCTAG----- [3794]

Hsa AAGTGCTTACAGTGCAGGTAGCTTTTTGAGATCTACTGCAATGTAAGCACTTCTTACATT [3605]  
Mmu AAGTGCTAACAGTGCAGGTAGCTTTTTGAGTTCTACTGCAGTGCCAGCACTTCTTACATT [3607]  
Mdo AAGTGCTTATAGTGCAGGTAGGTC-GT-GTAACTACTGCCCTGTGAGCACTTCCAACATG [3380]  
Meu AAGTGCTTATAGTGCAGGTAGGTCGGT-GTAACTACTGCCCTGTGAGCACTTCCAACATG [2866]  
Oan AAGTGCTTACAGTGCAGGTAG-CTTTTAGTACCTACTGCAATGTAAGCACTTCTAGCATT [3097]  
Aca AAGTGCTTATAGTGCAGGTAGTGTGTTGGCATCTACTGCAGTGTGGCACTTCCGTGCC- [3694]  
Pbi AAGTGCTTATAGTGCAGGTAGTCCAGTGATCTCTACTGCAGTGTAGCACTTCAAGTGGC- [3772]  
Cpi AAGTGCTTACAGTGCAGGTAGTGTGTTGGTATCTACTGCAGTGGAAAGCACTTCTAGCATT [3936]  
Cmy AAGTGCTTACAGTGCAGGTAGCATTTTTGGTATCTACTGCAGTGGAAAGCACTTCTAGCATT [3937]  
Psi AAGTGCTTACAGTGCAGGTAGCATTTTTGGGATCTACTGCAGTGGTAGCACTTCTAGCATT [3946]  
Asp AAGTGCTTACAGTGCAGGTAGCATTTTTGGGATCTACTGCAGTGGTAGCACTTCTAGCATT [3777]  
Ami ----- [3937]  
Asi AAGTGCTTACAGTGCAGGTAGTGTTTTTGGTATCTACTGCAGTATAAGCACTTCTAGCATT [3926]  
Tgu AAGTGCTTACAGTGCAGGTAGAGTT-CAGGATCTACTGCAGTTAAGCACTTCTGGCATT [2940]  
Cli AAGTGCTTACAGTGCAGGTAGAGTT-TAGGATCTACTGCAGTATAAGCACTTCTGGCATT [3534]

Gga AAGTGCTTACAGTGCAGGTAGAGCT-CAGCACCTACTGCAGTATAAAGCACTTCTGGCATG [3366]  
Xtr AAGTGCTTATAGTGCAGGTAGAAT--TTAAACCTACTGCACCATAAAGCACTTCTGCATC [3351]  
Lch AAGTGCTTACAGTGCAGGTAGTAAG-CAGTCTCTACTGCAGTGCAAGCACTTCTAGCATT [3780]  
Dre ----- [3794]

Hsa ACCAT--TCTCTTGTGTTAAGGTGCATCTAGTGCAGTTAGTGAAGCAGCTTAGAATCTAC [3663]  
Mmu ACCAT--TCTCTTGTGTTAAGGTGCATCTAGTGCAGTTAGTGAAGCAGCTTACAATCTAC [3665]  
Mdo ACCAC--TCCCTTGTGCTAAGGTGCATCTAGTGCAGTTAGTGATGTAGTTTAGTATCTAC [3438]  
Meu ACCAC--TCCCTTGTGCTAAGGTGCATCTAGTGCAGTTAGTGATGTAGCTTAGTATCTAC [2924]  
Oan ACCAT--TCCCTTGTGTTAAGGTGCATCTAGTGCAGTTAGTGAAGTAGCTTAGAATCTAC [3155]  
Aca ACGAT--CTTCTTGTGCTAAGGTGCATCTAGTGCAGTTAGTGAAGTAGCTTAGAATCTAC [3752]  
Pbi ACAAT--TTTCTTGTGCTAAGGTGCATCTAGTGCAGTTAGTGAAGTAGCTTAGACTCTAC [3830]  
Cpi ACAAT--TTCTTGTGTTAAGGTGCATCTAGTGCAGTTAGTGAAGTAGCTTAGAATCTAC [3994]  
Cmy ACAAT--TTCTTGTGTTAAGGTGCATCTAGTGCAGTTAGTGAAGTAGCTTAGAATCTAC [3995]  
Psi ACAAT--TTCTTGTGCTAAGGTGCATCTAGTGCAGTTAGTGAAGTAGCTTAGAATCTAC [4004]  
Asp ACAAT--TTCTTGTGCTAAGGTGCATCTAGTGCAGTTAGTGAAGTAGCTTAGAATCTAC [3835]  
Ami ----- [3937]  
Asi ACCAT--TTCTTGTGTTAAGGTGCATCTAGTGCAGTTAGTGAAGTAGCTTAGAATCTAC [3984]  
Tgu ACTGT--GTCCTTGTGTTAAGGTGCATCTAGTGCAGTTAGTGATGTAGCGTAGAATCTAC [2998]  
Cli ACTGT--GTTCTTGTGTTAAGGTGCATCTAGTGCAGTTAGTGAAGTAGCGTAGAATCTAC [3592]  
Gga ACCGT--GTCCTTGTGTTAAGGTGCATCTAGTGCAGTTAGTGACGTAGCGTAGAATCTAC [3424]  
Xtr ACTAA--CTCCTTGTGTTAAGGTGCATCTAGTGCAGTTAGTGACATAGTGATAGCATCTAC [3409]  
Lch GCTTT--TATCTTGTGGTAAGGTGCATCTAGCGCAGTTAGTGAGGTAGCTTAGAATCTAC [3838]  
Dre -----GCCTTCTGCTAAGGTGCATCTTGTGTAGTTAGTGAAGTAGTCTAGTATCTAC [3847]

Hsa TGCCCTAAATGCCCTTCTGGCACAGGCTG--CTAGTA-GTACCAAAGTGCTCATAGTGC [3720]  
Mmu TGCCCTAAATGCCCTTCTCGCACAGGCTA--CTAGTA-GTGCCAAAGTGCTCATAGTGC [3722]  
Mdo TGCCCTAAATGCTCCTTCCGGCACAAGCCG--CTGGTA-GTGCCAAAGTGCTCATAGTGC [3495]  
Meu TGCCCTAAATGCTCCTTCTGGCACAAGCCG--CTGGTA-GTGCCAAAGTGCTCATAGTGC [2981]  
Oan TGCCCTAAATGCTCCTTCTGGCACAAGCTG--CTGACA-GTACCAAAGTGCTCATAGTGC [3212]  
Aca TGCCCTGAATGCTCCTTCTGGCATAGGAGG--CTCGCA-GTGTCAAAGTGCTCATAGTGC [3809]  
Pbi TGCCCTGAGTGCTCCTTCTGGCACACGGAG--CTGGCA-GTGCCAAAGTGCTCATAGTGC [3887]  
Cpi TGCCCTAAATGCTCCTTCTGGCACAAGCTG--CTAGCA-GTATCAAAGTGCTCATAGTGC [4051]  
Cmy TGCCCTAAATGCTCCTTCTGGCACAAGCTG--CTAGCA-GTATCAAAGTGCTCATAGTGC [4052]  
Psi TGCCCTAAATGCTCCTTCTGGCACAAGCTG--CTAGCA-GTGTCAAAGTGCTCATAGTGC [4061]  
Asp TGCCCTAAATGCTCCTTCTGGCACAAGCTG--CTAGCA-GTGTCAAAGTGCTCATAGTGC [3892]  
Ami ----- [3937]  
Asi TGCCCTAAATGCTCCTTCTGGCACGAGGTG--CTAGCA-GTATCAAAGTGCTCATAGTGC [4041]  
Tgu TGCCCTAAATGCTCCTTCTGGCACAAGCTG--CTAGCA-GTATCAAAGTGCTCATAGTGC [3055]  
Cli TGCCCTAAATGCTCCTTCTGGCACAAGCTG--CTAGCA-GTATCAAAGTGCTCATAGTGC [3649]  
Gga TGCCCTAAATGCTCCTTCTGGCACAAGCTG--CTAGCA-GTATCAAAGTGCTCATAGTGC [3481]  
Xtr TGCCCTAAATGCTCCTTTTGGCACAGGTTG--AAAGCA-GTTCCAAAGTGCTCATAGTGC [3466]  
Lch TGCCCTAAATGCTCCTTCTGGCACAAGAAA--CATGCA-GTTCCAAAGTGCTCATAGTGC [3895]  
Dre TGCGCTAGATGTTCTTTTGGCAGGAGTAG--CTGGCA-GTTCCAAAGTGCTCACAGTGC [3904]

Hsa AGGTAGTTTTTGGCATGACT---CTACTGTAGTATGGGCACCTTCCAGTA-CTCTTG--CTG [3774]  
Mmu AGGTAGTTTTTATAACCACT---CTACTGCAGTGTGAGCACTTCTAGTA-CTCCTG--CTG [3776]  
Mdo AGGTAGTTTTTTTGCAAATGA--CTACTGTACTATGGGCACCTT-CAGCG-CTCCTG----- [3546]  
Meu AGGTAGTTTTTTTGCAAATAA--CTACTGTACTATGGGCACCTT-CAGCG-CTCCTG----- [3032]  
Oan AGGTAGTTTTTTTCAATTGATTCTACTGTAATGTGGGCACCTTACAGTA-CTCCAG----- [3266]  
Aca AGGTAGTTAATGCACCCAAA-TCTACTGTAATGTGGGCACCTTACAGTA-CTGCCG----- [3862]  
Pbi AGGTAGTTG-TGGACCCAAATTCTACTGTAATGTGGGCACCTTCCAGTC-CTGCTG----- [3940]  
Cpi AGGTAGTTTTTTGAATTGGA--TCTACTGTAATGTGGGCACCTTATAGTA-CTGCCA--TCC [4106]  
Cmy AGGTAGTTTTTTGAATTGGA--TCTACTGTAATGTGGGCACCTTATAGTA-CTGCCA--TCC [4107]  
Psi AGGTAGTCTTTGAATTGGA--TCTACTGTAATGTGGGCACCTTATAGTA-CTGCCA----- [4113]  
Asp AGGTAGTTTTTTGAATTGGA--TCTACTGTAATGTGGGCACCTTATAGTA-CTGCCA----- [3944]  
Ami -----ATC [3940]

---

---

|     |                                                                |          |
|-----|----------------------------------------------------------------|----------|
| Asi | AGGTAGCTTTTGTATTGGA--TCTACTGTAATGTGGGCACCTTACAGTA-CTGCCA--ATC  | [ 4096 ] |
| Tgu | AGGTAGCTTG-GAAATGGA--CCTACTGTAATGTGGGCACCTTACAGTA-CTGCTA-----  | [ 3106 ] |
| Cli | AGGTAGCTTTT-GAATTGAA--CCTACTGTAATGTGGGCACCTTATAGTA-CTGCTA----- | [ 3700 ] |
| Gga | AGGTAGCTTG-GCATTGGA--CCTACTGTAATGTGGGCACCTTACAGTA-CTGTTA-----  | [ 3532 ] |
| Xtr | AGGTAGTTGTATTGATGT---TCTACTGTAATATGGGCACCTTACAGTA-CTGCTA-----  | [ 3517 ] |
| Lch | AGGTAGTATTA-AATAAAA--CCTACTGTAATATGAGCACCTTATAGTA-CTGCTG--CTC  | [ 3949 ] |
| Dre | AGGTAGTGCC---AGTGGA--TCTACTGCAATGTCTGCACCTTCAAGTA-TTGCCG-----  | [ 3953 ] |
|     |                                                                |          |
| Hsa | CCGGGGCTAAAGTGCTGACAGTGACAGATAGTGGTCCTCTCCGTG-CTACCGCACTGTGGG  | [ 3833 ] |
| Mmu | CTGGGACTAAAGTGCTGACAGTGACAGATAGTGGTCCTCTCTGTG-CTACCGCACTGTGGG  | [ 3835 ] |
| Mdo | -----                                                          | [ 3546 ] |
| Meu | -----                                                          | [ 3032 ] |
| Oan | -----                                                          | [ 3266 ] |
| Aca | -----                                                          | [ 3862 ] |
| Pbi | -----                                                          | [ 3940 ] |
| Cpi | GCAGGGCTAAAGTGCTGACAGTGACAGGTAGCTAGCGTCTGGTTG-CTACTGCAGTGTGGG  | [ 4165 ] |
| Cmy | ACAGGGCTAAAGTGCTGACAGTGACAGGTAGCTGGCGTCTGTGTG-CTACTGCAGTGTGGG  | [ 4166 ] |
| Psi | -----                                                          | [ 4113 ] |
| Asp | -----                                                          | [ 3944 ] |
| Ami | CCAGGGCTAAAGTGCTTGCAGTGACAGGTAGCTGGCG-CTGGC-G-CTACTGCAGTGTGGG  | [ 3997 ] |
| Asi | CCAGGGCTAAAGTGCTTGCAGTGACAGGTAGCTGGCG-CTGGC-G-CTACTGCAGTGTGGG  | [ 4153 ] |
| Tgu | -----                                                          | [ 3106 ] |
| Cli | -----                                                          | [ 3700 ] |
| Gga | -----                                                          | [ 3532 ] |
| Xtr | -----                                                          | [ 3517 ] |
| Lch | CTAGTGCTAAAGTGCTTACAGTGACAGGTAGAAACTGTACACCACCTACTGCATTGTGGG   | [ 4009 ] |
| Dre | -----                                                          | [ 3953 ] |
|     |                                                                |          |
| Hsa | TACTTGCTGCTCCAGCA--CTGGGGGCTCCAAAGTGCTGTTCGTGCAGGTAGTGTGATTA   | [ 3891 ] |
| Mmu | TACTTGCTGCTCCAGCA--ATGGGGGCTCCAAAGTGCTGTTCGTGCAGGTAGTGTAAATTA  | [ 3893 ] |
| Mdo | -----TGGGGGGCTCCAAAGTGCTGTTCGTGCAGGTAGTGTGATAA                 | [ 3587 ] |
| Meu | -----                                                          | [ 3032 ] |
| Oan | -----                                                          | [ 3266 ] |
| Aca | -----                                                          | [ 3862 ] |
| Pbi | -----                                                          | [ 3940 ] |
| Cpi | GGCTTGCAGCTCTGGGG--CCAGAGGCTCCAAAGTGCTGTTCGTGCAGGTAGCGTGTGCA   | [ 4223 ] |
| Cmy | GGCTTGCAGCTCTGGGG-----                                         | [ 4183 ] |
| Psi | -----                                                          | [ 4113 ] |
| Asp | -----                                                          | [ 3944 ] |
| Ami | GGCTTGCAGCTCTGGGG--GCGGTGGCTCCAAAGTGCTGTTCGTGCAGGTAGTGTGTGCA   | [ 4055 ] |
| Asi | GGCTTGCAGCTCTGGGG--GCGGTGGCTCCAAAGTGCTGTTCGTGCAGGTAGTGTGTGCA   | [ 4211 ] |
| Tgu | -----                                                          | [ 3106 ] |
| Cli | -----                                                          | [ 3700 ] |
| Gga | -----                                                          | [ 3532 ] |
| Xtr | -----CTATGGGCTTCAAAGTGCTGTTCGTGCAGGTAGCTTAATAA                 | [ 3558 ] |
| Lch | CACTTTCTGCACTGGCT-----                                         | [ 4026 ] |
| Dre | -----TGTGTGTGTTAAAGTGCTGTTTGTGCAGGTAGTGTG-TTT                  | [ 3993 ] |
|     |                                                                |          |
| Hsa | CCCAACCTACTGCTGAGCTAGCACTTCCCGAGCCCCCGG--GCAGTCCTCTGTTAGTTTT   | [ 3949 ] |
| Mmu | CCTGACCTACTGCTGAGCTAGCACTTCCCGAGCCCCCAG--GCAGCCCTCTGTTAGTTTT   | [ 3951 ] |
| Mdo | CCTGACCTACTGCTGAGCTAGCACTTCCAGAGCCCCCTGG--GCAGTCCTCTGTTAGTTTT  | [ 3645 ] |
| Meu | -----GCAGTCCTCTGTTAGTTTT                                       | [ 3051 ] |
| Oan | -----GCAGCTCTCTGTTAGTTTT                                       | [ 3285 ] |
| Aca | -----GCAGTCCTCTGTTAGTTTT                                       | [ 3881 ] |
| Pbi | -----GCAGTCCTCTGTTAGTTTT                                       | [ 3959 ] |
| Cpi | GCCGA-CTACTGCCGAGTCAGCGCTTCGCGAGCCCCCGG--GCAGTCCTCTGTTAGTTTT   | [ 4280 ] |
| Cmy | -----GCAGTCCTCTGTTAGTTTT                                       | [ 4202 ] |



---

Psi -----GCAGTTCTCTGTTAGTTTT [4132]  
Asp -----GCAGTTCTCTGTTAGTTTT [3963]  
Ami GCCAT-CTACTGCCGGG-CAGCACTTCCCCGAGCCCCCGC--GCAGACTTCTGTTAGTTTT [4111]  
Asi GCCAT-CTACTGCCGGG-CAGCACTTCCCCGAGCCCCCGC--GCAGTCTTCTGTTAGTTTT [4267]  
Tgu -----GCAGACTTCTGTTAGTTTT [3125]  
Cli -----GCAGTCTTCTGTTAGTTTT [3719]  
Gga -----GCAGTCTTCTGTTAGTTTT [3551]  
Xtr -CAGACCTACTGCATGGGCGGCACCTTCCCAAGCCCATTG--GCAGTCTTCTGTTAGTTTT [3615]  
Lch -----GCAGTCCTCTGTTAGTTTT [4045]  
Dre CCT---CTACTGTAGGAGCAGCACTTCCACAACACACACA--GCAGTTCTCTGCTAGTTTT [4048]

Hsa GCATAGTTGCACTACAAGAAGAATGTAGTTGTGCAAATCTATGCAAAAACGATGGTGGCC [4009]  
Mmu GCATAGTTGCACTACAAGAAGAATGTAGTTGTGCAAATCTATGCAAAAACGATGGTGGCC [4011]  
Mdo GCATAGTTGCACTACAAGAAGAATGTAGTTGTGCAAATCTATGCAAAAACGATGGTGGCC [3705]  
Meu GCATAGTTGCACTACAAGAAGAATGTAGTTGTGCAAATCTATGCAAAAACGATGGTGGCC [3111]  
Oan GCATAGTTGCACTACAAGAAGAATGTAGTTGTGCAAATCTATGCAAAAACGACGGTGGCC [3345]  
Aca GCATAGTTGCACTACAAGAAGAATGTAGTTGTGCAAATCTATGCAAAAACGATTGTGGCC [3941]  
Pbi GCATAGTTGCACTACAGGAAGAGTGTAGTTGTGCAAATCTATGCAAAAACGATTGTGGCC [4019]  
Cpi GCATAGTTGCACTACAAGAAGAATGTAGTTGTGCAAATCTATGCAAAAACGATGGTGGCC [4340]  
Cmy GCATAGTTGCACTACAAGAAGAATGTAGTTGTGCAAATCTATGCAAAAACGATGGTGGCC [4262]  
Psi GCATAGTTGCACTACAAGAAGAATGTAGTTGTGCAAATCTATGCAAAAACGATGGTGGCC [4192]  
Asp GCATAGTTGCACTACAAGAAGAATGTAGTTGTGCAAATCTATGCAAAAACGATGGTGGCC [4023]  
Ami GCATAGTTGCACTACAAGAAGAATGTAGTTGTGCAAATCTATGCAAAAACGATGGTGGCC [4171]  
Asi GCATAGTTGCACTACAAGAAGAATGTAGTTGTGCAAATCTATGCAAAAACGATGGTGGCC [4327]  
Tgu GCATAGTTGCACTACAAGAAGAGAGTGGTTGTGCAAATCTATGCAAAAGCTGATGGTGGCC [3185]  
Cli GCATAGTTGCACTACAAGAAGAGTGTAGTTGTGCAAATCTATGCAAAAACGATGGTGGCC [3779]  
Gga GCATAGTTGCACTACAGGAAGAATGTAGTTGTGCAAATCTATGCAAAAACGATGGTGGCC [3611]  
Xtr GCATAGTTGCACTACAAGAAAAATGTAGTTGTGCAAATCTATGCAAAAACGATGGCAGCC [3675]  
Lch GCATAGTTGCACTACAAGAAGAATGTAGTTGTGCAAATCTATGCAAAAACGATGGTGACC [4105]  
Dre GCATAGTTGCACTACAAGAAAAACGGGAGTTGTGCAAATCTATGCAAAAACGATGGTGGCC [4108]

Hsa TG--CTGTTCTATGGTTAGTTTTGCAGGTTTGCATCCAGCTGTG---TGATATTCTGCTG [4064]  
Mmu TG--CTGGTCTATGGTTAGTTTTGCAGGTTTGCATCCAGCTGTA---TAATATTCTGCTG [4066]  
Mdo TG--CTGTTCTATGGTTAGTTTTGCAGGTTTGCATCCAGCTGTA---TGATATTCTGCTG [3760]  
Meu TG----- [3113]  
Oan TG--CTGTTCTATGGTTAGTTTTGCAGGTTTGCATCCAGCTGTA---TGGTACTCTGCTG [3400]  
Aca TG--CTGTTCTCTGGTTAGTTTTGCAGGTTTGCATCCAGCTGTA---TAATGTGTTGCTG [3996]  
Pbi TG--CTGTTCTCTGGTTAGTTTTGCAGGTTTGCATCCAGCTGTA---TGATACTCTGCTG [4074]  
Cpi TG--CTGTTCTCTGGTTAGTTTTGCAGGTTTGCATCCAGCTGTA---TGATACTCTGCTG [4395]  
Cmy TG--CTGTTCTCTGGTTAGTTTTGCAGGTTTGCATCCAGCTGTA---TGATACTCTGCTG [4317]  
Psi TG--CTGTTCTCTGGTTAGTTTTGCAGGTTTGCATCCAGCTGTA---TGATACTCTGCTG [4247]  
Asp TG--CTGTTCTCTGGTTAGTTTTGCAGGTTTGCATCCAGCTGTA---TGATACTCTGCTG [4078]  
Ami TG--CTGTTCTCTGGTTAGTTTTGCAGGTTTGCATCCAGCTGTA---TGATACTCTGCTG [4226]  
Asi TG--CTGTTCTCTGGTTAGTTTTGCAGGTTTGCATCCAGCTGTA---TGATACTCTGCTG [4382]  
Tgu TG--CTGTTCTCTGGTTAGTTTTGCAGGTTTGCATCCAGCTGTA---TGATACTCTGCTG [3240]  
Cli TG--CTGTTCTCTGGTTAGTTTTGCAGGTTTGCATCCAGCTGTA---TGATACTCTGCTG [3834]  
Gga TG--CTGTTCTCTGGTTAGTTTTGCAGGTTTGCATCCAGCTGTA---TGATACTCTGCTG [3666]  
Xtr TG--GTGCTTCATGGTTAGTTTTGCAGGTTTGCATCCAGTTGTTTC--TTCTGGCTCACTG [3731]  
Lch TG--CTGTTCTCTGGTTAGTTTTGCAGGTTTGCATCCAGCTTTTCACTATACACTTGCTG [4163]  
Dre TG--TGGACCCCGGTCAGTTTTGCTGGTTTGCATTCAGCTTTTA--AGACTGTGCGCTG [4164]

Hsa TGCAAATCCATGCAAAAACGACTGTGGTA--CTACTTACAATTAGTTTTGCA--GGTTTG [4120]  
Mmu TGCAAATCCATGCAAAAACGACTGTGGTG--CTACTTACGATTAGTTTTGCA--GATTTG [4122]  
Mdo TGCAAATCCATGCAAAAACGACTGTGGTG--CTGCTCACAGTCAGTTTTGCA--GGTCTTG [3817]  
Meu -----CTACTCACAGTCAGTTTTGCA--GGTCTTG [3141]  
Oan TGCAAATCCATGCAAAAACGACTGTGGCA--CTGCTTACAGTCAGTTTTGCA--GGTTTG [3456]  
Aca TGCAAATCCATGCAAAAACGACTGTGGCA--ACCACCACAGTCAGTTTTGCA--GGATTG [4054]

Pbi TGCAAATCCATGCAAAACTGACTGTGGCA--TCCACCACAGTCAGTTTTGCATGGATTTG [4132]  
Cpi TGCAAATCCATGCAAAACTGACTGTGGCA--CTGACTACAGTCAGTTTTGCA--GGATTG [4451]  
Cmy TGCAAATCCATGCAAAACTGACTGTGGCA--CTGACTACAGTCAGTTTTGCA--GGATTG [4373]  
Psi TGCAAATCCATGCAAAACTGACTGTGGCA--CTGACTACAGCCAGTTTTGCA--GGATTG [4303]  
Asp TGCAAATCCATGCAAAACTGACTGTGGCA--CTGACTACAGCCAGTTTTGCA--GGATTG [4134]  
Ami TGCAAATCCATGCAAAACTGACTGTGGCA----- [4255]  
Asi TGCAAATCCATGCAAAACTGACTGTGGCA--CTGCTTACAGTCAGTTTTGCA--GGTTTG [4438]  
Tgu TGCAAATCCATGCAAAACTGACTGTGGCA--CTGATTACAGTCAGTTTTGCA--GGTTTG [3296]  
Cli TGCAAATCCATGCAAAACTGACTGTGGCA--CTAATTACAGTCAGTTTTGCA--GGTTTG [3890]  
Gga TGCAAATCCATGCAAAACTGACTGTGGCA--CTGCTCACAGTCAGTTTTGCA--GGTTTG [3722]  
Xtr TGCAAATCCATGCAAAACTGATTATGGCA--CCTGCTCCTGTCAGTTTAGCT--GGTTTG [3787]  
Lch TGCAAATCCATGCAAAACTGACTGTAGCA----- [4192]  
Dre TGCAAATCCATGCAAAACTGATTGTGGCA--TTATCTGGGGTGAGTTTTGCA--GGATTG [4220]

Hsa CATTTTCAGCGTATA--TATGTATATGTGGCTGTGCAAATCCATGCAAAACTGATTGTGAT [4178]  
Mmu CAGTTTCAGCGTATA--TGTGAATATATGGCTGTGCAAATCCATGCAAAACTGATTGTGGG [4180]  
Mdo CAT--CGGCCTA-----TGTC AATTGCTGTGCAAATCCATGCAAAACTGATTAGGAG [3867]  
Meu CAT--CGGCCTA-----TGTCGATTGCTGTGCAAATCCATGCAAAACTGATTATGAG [3191]  
Oan CATCCCAGCGTA-----TACAAATTGCTGTGCAAATCCATGCAAAACTGATTGTGAT [3508]  
Aca CACAGCGACGGA-----CAGCAAGCTGGGATGCAAA--CC--TGCAAAACGGACTGTAGA [4105]  
Pbi CACAGCAACAGA-----CGCCAAGCTGAGATGCAAA--CC--AGCAAAACCCACCGTAGG [4183]  
Cpi CATTTCCAGCTTA-----TTTCAAA--CGCTGTGCAAATCCATGCAAAACTGACTGTGGT [4503]  
Cmy CATTTCCAGCTTA-----TTTCAAA--CGCTGTGCAAATCCATGCAAAACTGACTGTGGT [4425]  
Psi CATTTCCAGCTTA-----TTTCAAA--TGCTGTGCAAATCCATGCAAAACTGACTGTGGT [4355]  
Asp CATTTCCAGCTTA-----TTTCAAA--TGCTGTGCAAATCCATGCAAAACTGACTGTGGT [4186]  
Ami ----- [4255]  
Asi CATCCCAGCTTA-----TATCCGTTGCTGTGCAAATCCATGCAAAACTGACTGTGGT [4490]  
Tgu CATCCCAGCTTA-----CTAAAATTGCTGTGCAAATCCATGCAAAACTGACTGTGGT [3348]  
Cli CATCCCAGCTTA-----CTAAAATTGCTGTGCAAATCCATGCAAAACTGACTGTGGT [3942]  
Gga CATCCCAGCTTG-----CTAAAATTGCTGTGCAAATCCATGCAAAACTGACTGTGGT [3774]  
Xtr CATC--AGCTGA-----CTATTG--TGCTGTGCAAATCCATGCAAAACTGACTGTGGC [3836]  
Lch ----- [4192]  
Dre CATCC--GGCTTT-----ATTACAACATGCTGTGCAAATCCATGCAAAACTCGCTGCGCC [4273]

Hsa AAT--CCACCTTGTCGGGTAGCTTATCAGACTGATGTTGACTGTTGAATCT--CATGGCAA [4235]  
Mmu AAT--CCACCTTGTCGGATAGCTTATCAGACTGATGTTGACTGTTGAATCT--CATGGCAA [4237]  
Mdo GGC--CCGTCTGTTCGGATAGCTTATCAGACTGATGTTGACTGTTGGATCT--CATGGCAA [3924]  
Meu GGC--CCGTCTGTTCGGATAGCTTATCAGACTGATGTTGACTGTTGGATCT--CATGGCAA [3248]  
Oan GGT--CCATCCTATCGGATAGCTTATCAGACTGATGTTGACTGTTAGATCT--CCTGGCAA [3565]  
Aca TCA--CCTTTCTGTTCGGATAGCTTATCAGACTGATGTTGACTGTTGGATGT--CATGGCAA [4162]  
Pbi TCA--CCTTTCTGTTCGGATAGCTTATCAGACTGATGTTGACTGTTGGATGT--CATGGCAA [4240]  
Cpi TGC--CCATCCTGTTCGGATAGCTTATCAGACTGATGTTGACTGTTGGATCT--CATGGCAA [4560]  
Cmy TGC--CCATCCTGTTCGGATAGCTTATCAGACTGATGTTGACTGTTGGATCT--CATGGCAA [4482]  
Psi TGC--CCATCCTGTTCGGATAGCTTATCAGACTGATGTTGACTGTTGGATCT--CATGGCAA [4412]  
Asp TGC--CCATCCTGTTCGGATAGCTTATCAGACTGATGTTGACTGTTGGATCT--CATGGCAA [4243]  
Ami -----CCATCCTGTTCGGATAGCTTATCAGACTGATGTTGACTGTTGGATGT--CATGGCAA [4309]  
Asi GGT--CCATCCTGTTCGGATAGCTTATCAGACTGATGTTGACTGTTGGATGT--CATGGCAA [4547]  
Tgu GGT--CCATCCTGTTCGGATAGCTTATCAGACTGATGTTGACTGTTGGATCT--CATGGCAA [3405]  
Cli GGT--CCATCCTGTTCGGATAGCTTATCAGACTGATGTTGACTGTTGGATCT--CATGGCAA [3999]  
Gga GGT--CCATCCTGTTCGGATAGCTTATCAGACTGATGTTGACTGTTGGATCT--CATGGCAA [3831]  
Xtr TGG--CCATCCTGTTCGGATAGCTTATCAGACTGATGTTGACTGTTGGATGT--CATGGCAA [3893]  
Lch -----CCATCCTGTTCGGATAGCTTATCAGACTGGTGTGTTGGCTGTTAGATCA--CATGGCGA [4246]  
Dre AGG--CCAGTGTGTCAGATAGCTTATCAGACTGGTGTGTTGGCTGTTACATTCGCCCGGCGA [4331]

Hsa CACCAGTCGATGGGCTGTCTGACATTTTGG--TAT--GGCTGAGCCGCAGTAGTTCTTCAG [4292]  
Mmu CAGCAGTCGATGGGCTGTCTGACATTTTGG--TAT--GGCTGAGCCGCAGTAGTTCTTCAG [4294]  
Mdo CAGCAGTCGATGAGCTGTCTGACATTTTGG--TAT--GGCCGAGCCACAGCAGTTCTTCAG [3981]

Meu CAGCAGTCGATGGGCTGTCTGACATTTTGG-TAT--GGCCGAGCCACAGCAGTTCTTCAG [3305]  
Oan CAGCAGTCGATGGGCTGTCTGACATTTTGG-TAT--GGCTGAGTCACAGCAGTTCTTCAG [3622]  
Aca CAACAGTCGGTAGGCTGTCTGACATTTTGG-TGT-----CAGCAGTTCTTCAG [4209]  
Pbi CAACAGTCGGTAGGCTGTCTGACATTTTGG-TAT--GGCTACCCAGCAGCAGTTCTTCAG [4297]  
Cpi CAACAGTCGGTAGGCTGTCTGACATTTTGG-TAT--GGCTAACTAGCACCAGTTCTTCAG [4617]  
Cmy CAACAGTCGGTAGGCTGTCTGACATTTTGG-TAT--GGCTAACTTGCACCAGTTCTTCAG [4539]  
Psi CAACAGTCGGTAGGCTGTCTGACATTTTGG-TAT--GGC-AACGTGCACCAGTTCTTCAG [4468]  
Asp CAACAGTCGGTAGGCTGTCTGACATTTTGG-TAT--GGCTAACGCGCACCAGTTCTTCAG [4300]  
Ami CAACAGTCGGTAGGCTGTCTGACATTTTGG-TAT----- [4342]  
Asi CAACAGTCGGTAGGCTGTCTGACATTTTGG-TAT----- [4580]  
Tgu CAACAGTCGGTAGGCTGTCTGACATTTTGG-TAT----- [3438]  
Cli CAACAGTCGGTAGGCTGTCTGACATTTTGG-TAT--GGCTAACCAGCACCAGTTCTTCAG [4056]  
Gga CAACAGTCGGTAGGCTGTCTGACATTTTGG-TAT--GGCTGCCCGGCAGCAGTTCTTCAG [3888]  
Xtr CAACAGTCGGTAGGCTGTCTGACATTTTGG-TGT--GGCCCGCTAGAAGCAGTTCTTCAG [3950]  
Lch CAACAGTCGGTAGGCTGTCTGACATTTTGG-TGT--GGCAAACCTGCACCAGTTCTTCCC [4303]  
Dre CAACAGTCTGTAGGCTGTCTGACATTTTGGGCAT--GGCTGACCTGCAGCAGTTCTTCAC [4389]

Hsa TGGCA-AGCTTTATGTCCTGACCC---AGCTAAAGCTGCCAGTTGAAGAAGCTGTTGCCCT [4348]  
Mmu TGGCA-AGCTTTATGTCCTGACCC---AGCTAAAGCTGCCAGTTGAAGAAGCTGTTGCCCT [4350]  
Mdo TGGCG-AGCTTTATGTCCTGTC---AGCTAAAGCTGCCAGTTGAAGAAGCTGCTGAGCT [4037]  
Meu TGGCG-AGCTTTATGTCCTGTC---AGCTAAAGCTGCCAGTTGAAGAAGCTGCTGAGCT [3361]  
Oan TGGCA-AGCTTTACGTCCTGTCC---AGCTAAAGCTGCCAGTTGAAGAAGCTGTTGAACT [3678]  
Aca CGGCATCGCTTTACGTCCTTAAAGAAGCTAAAGCTGCCAGTTGAAGAAGCTGTTGGCCC [4269]  
Pbi TGGCA-CGCTTTACGTCCTTCCA-GCAGCTAAAGCTGCCAGTTGAAGAAGCTGTTGACCG [4355]  
Cpi TGGCA-AGCTTTACGTCCTGTCTAGCAGCTAAAGCTGCCAGTTGAAGAAGCTGTTGAATG [4676]  
Cmy TGGCA-AGCTTTAAGTCCCTGTCTAGCAGCTAAAGCTGCCAGTTGAAGAAGCTGTTGAATG [4598]  
Psi TGGCA-AGCTTTACGTCCTGTCTCGTAGCTAAAGCTGCCAGTTGAAGAAGCTGTTGAACG [4527]  
Asp TGGCA-AGCTTTACGTCCTGTCTCGTAGCTAAAGCTGCCAGTTGAAGAAGCTGTTGAACG [4359]  
Ami ----- [4342]  
Asi ----- [4580]  
Tgu ----- [3438]  
Cli TGGCA-AGCTTTATGTCCTTCTCTAGTAGCTAAAGCTGCCAGTTGAAGAAGCTGTTGAATG [4115]  
Gga TGGCA-AGCTTTATGTCCTTCTCTAGTAGCTAAAGCTGCCAGTTGAAGAAGCTGTTGAATG [3947]  
Xtr TGGCA-AGCTTTATGTTGTTTCTCTGT-GCTAAAGCTGCCAGTTGAAGAAGCTGTTGAAAG [4008]  
Lch TGGCT-AGCCTTATGTCCATCCTTGCTAGCTAAAGCTGCCAGTTGAAGAAGCTGTTGTGGT [4362]  
Dre TGGCA-AGCTTTATGTCCTTGTGTACCAGCTAAAGCTGCCAGCTGAAGAAGCTGTTGTGGT [4448]

Hsa CTGCCCC--CCACGGCCGGCTGGGG-TTCCTGGGGATGGGATTT-----GCTTCCT-GTC [4399]  
Mmu CTGCCCC--CCTCGGACGGCTGGGG-TTCCTGGGGATGGGATTT-----GATGCCA-GTC [4401]  
Mdo CTGCTCC--CCTTGGCCGGCTGGGG-TTCCTGGGGATGGGATTT-----GATTACT-GCC [4088]  
Meu CTGCTCC--CCTTGGCCGGCTGGGG-TTCCTGGGGATGGGATTT-----GATTACT-GCC [3412]  
Oan CAGCCCC--CCGCCGGCCGGCTGGGG-TTCCTGGTGATGCGATTTTCT--TGTGCTC-GCC [3732]  
Aca GGGCCCA--CCGCTGCCAGCTGGGG-TTCCTGGTGATGTGATTTT---ATTTTGGT-GTT [4322]  
Pbi TAGCTGC--CTGCTGCCTGCTGGGG-TTCCTGGTGATGTGATTTT---ACCCTGAT-GTT [4408]  
Cpi TAGCCAC--CCCCTGCCAGCTGGGG-TTCCTGGTGATGCGATTTT---ATCCTACC-ACC [4730]  
Cmy TAGCCAC--CCCCTGCCAGCTGGGG-TTGCTGGTGATGCGATTTT---ATCCTACC-ACC [4652]  
Psi TAGCCAC----- [4534]  
Asp TAGCCAC----- [4366]  
Ami -----CCACAGCCAGCTGGGG-TTCCTGGTGATGCGATTTT---TACCCACT--GCC [4390]  
Asi -----CCACAGCCAGCTGGGG-TTCCTGGTGATGCGATTTT---TACCCACT--GCC [4628]  
Tgu ----- [3438]  
Cli TAGCCAC--CTGCCGCCCGCCGGGG-TTCCTGGCGATGGGATTTT---ACCCTTTTGGC [4171]  
Gga TAGCCAC----- [3954]  
Xtr TGGCTAC--CTGCTGACAGCGGGGATTCCTGGAGATGGGATTTTATT--TTGGCAGCCA [4064]  
Lch TTGCTGG--CTGTTGTCAATGGGGG-TTCCTGGTAACGTGATTTTA-----TAACACAAG [4414]  
Dre TGGCTCT--CTGCCGGCCAGGGGAA-TTCCTGGCAGAGTGATTTT---TAAACCTAA---TGA [4502]

Hsa ACAAAATCACATTGCCAGGGATTTCCAACCGACCCTG--CTCTGGCTGCTTGGGTTTCCTGG [4457]  
Mmu ACAAAATCACATTGCCAGGGATTTCCAACCTGACCCTG--CTCTGGCTGCTTGGGTTTCCTGG [4459]  
Mdo ACAAAATCACATTGCCAGGGATTTCCAACCTGACCCTG--CTCTGGCTGCTTGGGTTTCCTGG [4146]  
Meu ACAAAATCACATTGCCAGGGATTTCCAACCTGACCCTG--CTCTGGCTGCTTGGGTTTCCTGG [3470]  
Oan A-AAATCACATTGCCAGGGATTTCCAACCTGGCGGCG--GCCCGGCTGCCTGGGTTTCCTGG [3789]  
Aca CAGAATCACATTGCCAGGGATTTCCAACCATCAGTG--TTTTGGTTGTTTGGGTTTCCTGG [4380]  
Pbi CAGAATCACATTGCCAGGGATTTCCAACCTGTTGGCA--TTTTGGTTGTTTGGGTTTCCTGG [4466]  
Cpi CAAAATCACATTGCCAGGGATTTCCAACGGGCGGCG--TTGTGGCTGTTTGGGTTTCCTGG [4788]  
Cmy CAAAATCAAATTGCCAGGGATTTCCAACGGGCGAGCG--TTGTGGCTGTTTGGGTTTCCTGG [4710]  
Psi -----TTGTGGCTGTTTGGGTTTCCTGG [4556]  
Asp -----TTGTGGCTGTTTGGGTTTCCTGG [4388]  
Ami CAAAATCACATTGCCAGGGATTTCCAACCTGGCTGCG--TTGTGGCTGTTTGGGTTTCCTGG [4448]  
Asi CAAAATCACATTGCCAGGGATTTCCAACCGGCTGCG--TTGTGGCTGTTTGGGTTTCCTGG [4686]  
Tgu -----TTATGGCTGTTTGGGTTTCCTGG [3460]  
Cli CAAAATCACATTGCCAGGGATTTCCAACGGGCCCCA--TTGTGGCTGTTTGGGTTTCCTGG [4229]  
Gga -----TTGTGGCTGTTTGGGTTTCCTGG [3976]  
Xtr ATAAATCACATTGCCAGGGATTTCCAACCTGTCGGCC--GTGTGGCTGTTTGGGTTTCCTGG [4122]  
Lch TAGAATCACATTGCCAGGGATTTCCAACCTGATAACA--TTGTGGCTGTTTGGGTTTCCTGG [4472]  
Dre CTGAATCACATTGCCAGGGATTTCCAATGGCTCGTG--TTGTGGCTGTGTGGGTTTCCTGG [4560]

Hsa CATGCTGATTTGTGACTTAA---GATTA AAAATCACATTGCCAGGGATTACCACGCAACC- [4513]  
Mmu CATGCTGATTTGTGACTTGA---GATTA AAAATCACATTGCCAGGGATTACCACGCAACC- [4515]  
Mdo CATGCTGATTTGTGACTTAA---GATGAAAATCACATTGCCAGGGATTACCACGCAGCC- [4202]  
Meu CATGCTGATTTGTGACTTAA---GATTA AAAATCACATTGCCAGGGATTACCACGCAACC- [3526]  
Oan CATGCTGATTTGTGACTTAA---GAGAAAAATCACATTGCCAGGGATAACCACGCATCC- [3845]  
Aca CATGCTGATTTGTGACTTAA---GATGAAAATCACATTGCCAGGGATTACCACATAAACC- [4436]  
Pbi CATGCTGATTTGTGACTTAA---GATTA AAAATCACATTGCCAGGGATTACCACATAAACC- [4522]  
Cpi CATGCTGATTTGTGACTTAA---GATTA AAAATCACATTGCCAGGGATTACCACATAAACC- [4844]  
Cmy CATGCTGATTTGTGACTTAA---GATTA AAAATCACATTGCCAGGGATTACCACATAAACC- [4766]  
Psi CATGCTGATTTGTGACTTAA---GATTA AAAATCACATTGCCAGGGATTACCACATAAACC- [4612]  
Asp CATGCTGATTTGTGACTTAA---GATTA AAAATCACATTGCCAGGGATTACCACATAAACC- [4444]  
Ami CATGCTGATTTGTGACTTAA---AATTA AAAATCACATTGCCAGGGATTACCACAGAGCC- [4504]  
Asi CATGCTGATTTGTGACTTAA---AATTA AAAATCACATTGCCAGGGATTACCACAGAGCC- [4742]  
Tgu CATGATGATTTGTGACTTAA---GATTA AAAATCACATTGCCAGGGATTACCACGCAGCC- [3516]  
Cli CATGATGATTTGTGACTTAA---GATTA AAAATCACATTGCCAGGGATTACCACACAGCC- [4285]  
Gga CATGATGATTTGTGAGTTAA---GATTA AAAATCACATTGCCAGGGATTACCACATAGCC- [4032]  
Xtr CATGCTGATTTGTGAGTTAA---GATTA AAAATCACATTGCCAGGGATTACCACACAACC- [4178]  
Lch CATGCTGATTTGTGACTTAA---GATAAAAATCACATTGCCAGGGATTACCACACAGCC- [4528]  
Dre CATGCTGATTTGTGACTGTAGTAAAAAAAATCACATTGCCAGGGATTACCACACTACC- [4619]

Hsa ----- [4513]  
Mmu ----- [4515]  
Mdo ----- [4202]  
Meu ----- [3526]  
Oan ----- [3845]  
Aca ----- [4436]  
Pbi ----- [4522]  
Cpi ----- [4844]  
Cmy ----- [4766]  
Psi ----- [4612]  
Asp ----- [4444]  
Ami ----- [4504]  
Asi ----- [4742]  
Tgu ----- [3516]  
Cli ----- [4285]  
Gga ----- [4032]  
Xtr -CTGTGGCTGGTAGGATTCCCTGGCAGAGTGATTTGGAAATGTATGGTACAAAA----TCA [4233]

Lch -CTGTGATTGGTGGGATTTCCTGGCAGAGTGATTTGGGTTTCTCTGCTACAAAAAATCA [4587]  
Dre -CTGTGGCGGGAGGGTTTCCTGGCACCGTGATTTGGTGGATAAACAGAAATGAAAA-TCA [4677]

Hsa -----GGGCTCT-GCCTCCCGTGCCTACTGAGCTGA [4543]  
Mmu -----GGGCTCC-GCCTCCCGTGCCTACTGAGCTGA [4545]  
Mdo -----GGGCTCT-GCCTCCTGTGCCTACTGAGCTGA [4232]  
Meu -----GGGCTCT-GCCTCCTGTGCCTACTGAGCTGA [3556]  
Oan -----GGGCTCT-GCCTCCTGTGCCTACTGAGCTGA [3875]  
Aca -----GGGCTTG-GCCTTCCGTGCCTACTGAGCTGA [4466]  
Pbi -----GGGCCCAAGCCTCCCGTGCCTACTGAGCTGA [4553]  
Cpi -----GGGCTCT-GCCTCCCGTGCCTACTGAGCTGA [4874]  
Cmy -----GGGCTCT-GCCTCCCGTGCCTACTGAGCTGA [4796]  
Psi ----- [4612]  
Asp ----- [4444]  
Ami -----GGGCCCT-GCCTCCGGTGCCTACTGAGCTGA [4534]  
Asi ----- [4742]  
Tgu ----- [3516]  
Cli -----GGGCGCT-GCCTCCTGTGCCTACTGAGCTGA [4315]  
Gga ----- [4032]  
Xtr CATTGCCAGGGATTTCCAATCAGTCCC--TGCTCC-GCCTCCCGTACCTACTGGGCTGA [4290]  
Lch CATTGCCAGGGATTTCCAACCAGGCAC--GGGCTTT-GCCTCCTGTGCCTACTGAGCTGA [4644]  
Dre CATTGCCAGGGATTTCCACTCCTGCAC--GGGCT-G-GTCTCCTGTGCCTGCTGTGCTGA [4733]

Hsa AACACAGTTGGTTTT-GTGTACACTGGCTCAGTT---CAGCAGGAACAGGGGTCAAGCCCC [4599]  
Mmu AACAA--GTTGATTC-CAGTGCCTACTGGCTCAGTT---CAGCAGGAACAGGAGTCCAGCCCC [4599]  
Mdo AACACAGTTGCTTTT-GGATAAACTGGCTCAGTT---CAGCAGGAACAGGAGTCTGGCCCT [4288]  
Meu AACACAGTTGCTTTT-GTATAAACTGGCTCAGTT---CAGCAGGAACAGGAGTCTGGCCCT [3612]  
Oan AACGCAGTTGCTTTT-GCTTAAACTGGCTCAGTT---CAGCAGGAACAGGAGTCTAGCCCA [3931]  
Aca TACTCAGTTGCTTTT-AGATAAACTGGCTCAGTT---CAGCAGGAACAGGAGTCCAGCCCA [4522]  
Pbi TACTCAGTTGCTTTT-GGAAAACTGGCTCAGTT---CAGCAGGAACAGGAG----- [4600]  
Cpi TACTCAGTCGCTTTT-GCTTAAACTGGCTCAGTT---CAGCAGGAACAGGAGTCGGGCTCC [4930]  
Cmy TACTCCGTTGCTTTT-GGTAAACTGGCTCAGTTCTCCAGCAGGAACAGGAGTCCGGCCCC [4855]  
Psi ----- [4612]  
Asp ----- [4444]  
Ami TACTCAGTTGCTTTTGGTTTTAAACTGGCTCAGTT---CAGCAGGAACAGGAGTCTGGCTCC [4591]  
Asi ----- [4742]  
Tgu ----- [3516]  
Cli TTTGTCAGTTGCTTTT-GGTAAACTGGCTCAGTT---CAGCAGGAACAGGAGTCTGCGC-- [4369]  
Gga ----- [4032]  
Xtr TAATCAGTGGTTATATCTTCCCCTGGCTCAGTT---CAGCAGGA-CAGGAGTTGCAGCCG [4346]  
Lch CATTTCAGTTTAT--GAATATACTGGCTCAGTT---CAGCAGGAACAGGAGTTGAGCTCC [4699]  
Dre TAATCAGTGGACG--GCTGTGACTGGCTCAGTT---CAGCAGGAACAGGGGCTGGTCTT [4788]

Hsa CT--ATTGGACCCGCCCTCCGGTGCCTACTGAGCTGATATCAGTTCTCATTTTACACACT [4657]  
Mmu CT--ATTGGACCCGCCCTCCGGTGCCTACTGAGCTGATATCAGTTCTCATTTTACACACT [4657]  
Mdo CT--GTTGGACCCGCCCTCCGGTGCCTACTGAGCTGATAACAGTTCTGATTTTACACACT [4346]  
Meu CT--ATTGGACCCGCCCTCCGGTGCCTACTGAGCTGATAACAGTTCTGATTTTACACACT [3670]  
Oan GC--ATCGGACTGACCCCTCCAGTGCCTACTGAGCTGATATCAGTTCTCGTTG-ACCCACT [3988]  
Aca GT--GATGGACCCGTCTCCGGTGCCTACTGAGCTGATATCAGTTCTGATTTTACACACT [4580]  
Pbi ----GATGGACCCGTCTCCGGTGCCTACTGAGCTGATATCAGTTCTGATTTTACATACT [4656]  
Cpi AG--GATGGACCCGTCTCCGGTGCCTACTGAGCTGATATCAGTTCTGATTTTACATACT [4988]  
Cmy AG----- [4857]  
Psi ----- [4612]  
Asp ----GATGGACCCGTCTCCGGTGCCTACTGAGCTGATATCAGTTCTGATTTTACATACT [4500]  
Ami AG--GATGGACCCGTCTCCAGTGCCTACTGAGCTGATATCAGTTCTGATTTTACATACT [4649]  
Asi ----- [4742]  
Tgu ----GATGGACCCGTCTCCGGTGCCTACTGAGCTGATATCAGTTCTGATTTTACACACT [3572]

Cli ----GATGGACCCGTCCTCCGGTGCCTACTGAGCTGATATCAGTTCTGATTTTACACACT [4425]  
Gga ----GATGGACCCGTCCTCCGGTGCCTACTGAGCTGATATCAGTTCTGATTTTACATACT [4088]  
Xtr AG--GATGGACCTGTCTCTTGTGCCTACTGAACTGATATCAGTTCT-ATTTTACACACT [4403]  
Lch AT--GGTGGACTCGACCTCCTGTGCCTACTGAGCTGATATCAGTTCTTATTTAACATACT [4757]  
Dre CT--TCAGGACCTGAGCTCCGGTGCCTTCTGAGCTGATATCAGTTGT-AGTAAA-TCACT [4844]

Hsa GGCTCAGTTCAGCAGGAACAGGAGTCGAGCCCTTGA--GCCGTGGCCTCGTTTCAAGTAAT [4715]  
Mmu GGCTCAGTTCAGCAGGAACAGGAGTCGAGCCCTTGA--GCCGTGGCCTCGTTTCAAGTAAT [4715]  
Mdo GGCTCAGTTCAGCAGGAACAGGAGTCGAGCCCGAGA--GCTGTGACCTGGTTTCAAGTAAT [4404]  
Meu GGCTCAGTTCAGCAGGAACAGGAGTCGAGCCCGAGA--GCTGTGACCTGGTTTCAAGTAAT [3728]  
Oan GGCTCAGTTCAGCAGGAACAGGAGTCGAGCCCGAGA--GCTGTGACCTGGTTTCAAGTAAT [4046]  
Aca GGCTCAGTTCAGCAGGAACAGGAGTCGAGCCCTAAA--GCTGTGACCTGCTTCAAGTAAT [4638]  
Pbi GGCTCAGTTCAGCAGGAACAGGAGTCGAGCCCAAAA--GCTGTGGCTAGGTTTCAAGTAAT [4714]  
Cpi GGCTCAGTTCAGCAGGAACAGGAGTCGAGCCCTAAA--GTTGTGACCTGGTTTCAAGTAAT [5046]  
Cmy -----GCTGTGACCTGGTTTCAAGTAAT [4879]  
Psi -----GCTGTGACCTGGTTTCAAGTAAT [4634]  
Asp GGCTCAGTTCAGCAGGAACAGGAGTCGAGCCCTAAA--GCTGTGACCCGGTTTCAAGTAAT [4558]  
Ami GGCTCAGTTCAGCAGGAACAGGAGTCGAGCCCAAAA--GCTGTTACCTGGTTTCAAGTAAT [4707]  
Asi -----GCTGTTACCTGGTTTCAAGTAAT [4764]  
Tgu GGCTCAGTTCAGCAGGAACAGGAGTCGAGCCCTAGA--GCTGTGGCCTGGTTTCAAGTAAT [3630]  
Cli GGCTCAGTTCAGCAGGAACAGGAGTCGAGCCCTAGA--GCTGCGGCTGGTTTCAAGTAAT [4483]  
Gga GGCTCAGTTCAGCAGGAACAGGAGTCGAGCCCTAGA--GCTGTACCTGGTTTCAAGTAAT [4146]  
Xtr GGCTCAGTTCAGCAGGAACAGGAGTCGGGCCCTTGA--GCAGTGGCCCGTTTCAAGTAAT [4461]  
Lch GGCTCAGTTCAGCAGGAACAGGAGTTGAGCCCTAAA--GCTGAGACCTGGTTTCAAGTAGT [4815]  
Dre GGCTCAGTTCAGCAGGAACAGGAGTGTGGCCCTCC--GTTGTTCCCTTGTTCAGTAAT [4902]

Hsa CCAGGATAGGCTGTGCAGGTCCCAATGGGCCTATTCTTGGTTACTTGCACGGGGACGCGG [4775]  
Mmu CCAGGATAGGCTGTGCAGGTCCCAAGGGGCCTATTCTTGGTTACTTGCACGGGGACGCGG [4775]  
Mdo CCAGGATAGGCTGGACCCATTCTCATCGGCCATTCTCGACTACTTGCACCTCGGGCGCGG [4464]  
Meu CCAGGATAGGCTGGACCCATTCTCATTTGGCCTATTCTCGGTTACTTGCACCTCGGGCACGG [3788]  
Oan CCAGGATAGGCTGTGTGCGCTCAGATTGGCCTGTTCTCGGTTACTTGCACCCAGGGGGCGG [4106]  
Aca CCAGGATAGGCTGTGTGCATTCTTAATGGCCTATCCTTGATTACTTGCACCTGGGAAATAG [4698]  
Pbi CCAGGATAGGCTGTAGGTACAGCAGTCAGCCTGTTCTCGATTACTTGGCCTTGGAGGCAG [4774]  
Cpi CCAGGATAGGCTGTGTGCAATCTAATTGGCCTATTCTTGATTACTTGCACCTGGGAGGCAA [5106]  
Cmy CCAGGATAGGCTGTGTGCAATCTAATTGGCCTATTCTTGATTACTTGCACCTGGGAGGCAA [4939]  
Psi CCAGGATAGGCTGTGTGCAATCTAATTGGCCTATTCTTGGTTACTTGCACCTGGGAGGCAA [4694]  
Asp CCAGGATAGGCTGTGTGCAATCTAATTGGCCTATTCTTGATTACTTGCACCTGGGAGGCAA [4618]  
Ami CCAGGATAGGCTGTATGCATTGCAGTTGGCCTATTCTTGATTACTTGCACCTGGGAGACAG [4767]  
Asi CCAGGATAGGCTGTATGCATTGCAGTTGGCCTATTCTCGATTACTTGCACCTGGGAGACAG [4824]  
Tgu CCAGGATAGGCTGTATCCATTCTAACTCGCCTATTCTTGGTTACTTGCACCTGGGACAGGG [3690]  
Cli CCAGGATAGGCTGTATCCATCCGAGCTGGCCTATTCTTGGTTACTTGCACCTAGGAGGCAA [4543]  
Gga CCAGGATAGGCTGTATCCATTCTGCTGGCCTATTCTTGGTTACTTGCACCTGGGAGGCAG [4206]  
Xtr CCAGGATAGGCTGTTACATTCTGCGTGGCCTATTCTTGATTACTTGCATTGGGAGGCAG [4521]  
Lch CCAGGATAGGCTGTGAGTTTTAGAAATTAGCCTGTTCTTGATTACTTGCACCTAGGGGGCAG [4875]  
Dre CCAGGATAGGCTGTCTG---TCCTGGAGGCCTATTCTATGATTACTTGCACCTAGGTGGCAG [4959]

Hsa GC--GCTGTGGCTGGATTCAAGTAATCCAGGATAGGCTGTTTCCAT-CTGTGAGGCCTAT [4832]  
Mmu GC--GCTGCGGCTGGATTCAAGTAATCCAGGATAGGCTGTGTCCGT-CCATGAGGCCTGT [4832]  
Mdo CC--GCTGCGGCCAGGTTCAAGTAATCCAGGATAGGCTGTGTCCAG-CTGCG--GGCCTAT [4520]  
Meu CC--GCTGCGGCCAGGTTCAAGTAATCCAGGATAGGCTGTGTCCAG-CTGCT--GGCCTAT [3844]  
Oan CC--GCTCCCGCCCGGTTCAAGTAATCCAGGATAGGCTGTGCGCA--CCAC--GGCCTGT [4160]  
Aca CC--GCTTCAGCCTGGTTTCAAGTAATCCAGGATAGGCTGTTACCAGGCAGTACGGCCTAT [4756]  
Pbi CC--GTCTCAGCCTGGTTTCAAGTAATCCAGGATAGGCTGTTACCAGGCAACACGGCCTAT [4832]  
Cpi CC--GCCGTAGCCCGGTTTCAAGTAATCCAGGATAGGCTGTTACCAGGCAGCACGGCCTAT [5164]  
Cmy CC--GCCGCAGCCCGGTTTCAAGTAATCCAGGATAGGCTGTTACCAGGCAGCACGGCCTAT [4997]  
Psi CC--GCCACAGCCCGGTTTCAAGTAATCCAGGATAGGCTGTTACCAGGCAGCACGGCCTAT [4752]  
Asp CC----- [4620]

Ami CC--GTCACGGCCCGGTTCAAGTAATCCAGGATAGGCTGGTGCCAGGCC--CGTGGCCTAT [4824]  
Asi CC--GTCACGGCCCGGTTCAAGTAATCCAGGATAGGCTGGTGCCAGGCC--CGTGGCCTAT [4881]  
Tgu CC----- [3692]  
Cli CC--GCCGCAGCCCGGTTCAAGTAATCCAGGATAGGCT--GTTCCAGCC----CGGCCTGT [4596]  
Gga CC----- [4208]  
Xtr CT--GCTGCTGCCTGGTTCAAGTAATCCAGGATAGGCTGTTTCCCTCAAAGCACGGCCTAC [4579]  
Lch CA--GCTCCGGCCTGGTTCAAGTAATCCAGGATAGGCTGTTTCCACCCAGTGAGGCCTAT [4933]  
Dre CC--GCCTTTGCCTGGTTCAAGTAATCCAGGATAGGTTAGTTCCCACTAGTACGGCCTAT [5017]

Hsa TCTTGATTACTTGTCTGAGGCGAGC--CCCGGGACCCAGTTCAAGTAATTCAGGATAG [4890]  
Mmu TCTTGATTACTTGTCTGAGGCGAGC--CCCGGGACCCAGTTCAAGTAATTCAGGATAG [4890]  
Mdo CCTTGATTGCTTGTCTGAGGCGGC--GCCGGGACCCGTTTCAAGTAATCCAGGATAG [4578]  
Meu TCTTGATTACTTGTCTGAGGCGAGC--GCCAGGACCCGTTTCAAGTAATCCAGGATAG [3902]  
Oan CCTCGGTTACTTGTCTCGGGAGGTGGC----- [4187]  
Aca TCTTGATTACTTGTCTCAGGAGGCGGC--ACTGTGGCCAGTTTCAAGTAATCCAGGATAG [4814]  
Pbi TCTTGATTACTTGTCTCAGGAGGCGGC--GCTGTGGCTAGGTTCAAGTAATCCAGGATAG [4890]  
Cpi TCTTGATTACTTGTCTCAGGAGGCGGC--GCCGGCGCCGGGTTCAAGTAATCCAGGATAG [5222]  
Cmy TCTTGATTACTTGTCTCAGGAGGCGGC----- [5024]  
Psi TCTTGATTACTTGTCTCGGGAGGCGGC----- [4779]  
Asp ----- [4620]  
Ami TCTCGATTACTTGTCTCGGGACGTGGC----- [4851]  
Asi TCTCGATTACTTGTCTCGGGACGTGGC----- [4908]  
Tgu -----GCCAGACCCAGTTTCAAGTAATCCACTATTG [3723]  
Cli TCCCGGTTACTTGTCTCCGGGAGGTGGC--GCCGGCCCCAGGTTCAAGTAATCCAGGATAG [4654]  
Gga -----GCTGGCGCTGGGTTCAAGTAATCCAGGATAG [4239]  
Xtr TCTTGATTACTTGTCTCAGGAAGTAGC--TTGGGCGCTCGCTTCAAGTAATCCAGGATAG [4637]  
Lch TCTCGATTACTTGTCTCAGGAGGAAGC--GCCGGGACCCAGCTTCAAGTAATCCAGGATAG [4991]  
Dre TCTTGATTACTTGTCTCAGGAGGAGGC--GCTTTGGCCTGGTTCAAGTAATCCAGGATAG [5075]

Hsa GTTGTG----TGCTGTCCAGCCTGTTCTCCATTACTTGGCTCGGGGACCGGTG--TGGCC [4944]  
Mmu GTTGTGG---TGCTGACCAGCCTGTTCTCCATTACTTGGCTCGGGGGCCGGTG--TGGCC [4945]  
Mdo GCTGTT----TTCTCTTCCAGCCTGTTCTCCATTACTTGGTTTCGGGGGCCGGTA--TGGCT [4632]  
Meu GCTGTT----TTCTCTTCCAGCCTGTTCTCCATTACTTGGTTTCGGGGGCTGGTA--TGGCC [3956]  
Oan -----GGTCC [4192]  
Aca GCTGTGGGTTACTGATGTCCAGCCTGTTCTTGGATTACTTGGCCTTGGAGGCAGCC--GATGA [4872]  
Pbi GCTGTAGGTACAGCAGTCCAGCCTGTTCTCGATTACTTGGCCTTGGAGGCAGCC--GACTG [4948]  
Cpi GCTGTGGTCTGCGCAGTCCGCCTGTTCTCGATTACTTGGCGCCGGAGCCGGCC--GATAC [5280]  
Cmy -----GACAC [5029]  
Psi ----- [4779]  
Asp ----- [4620]  
Ami -----GAAGC [4856]  
Asi -----GAAGC [4913]  
Tgu GCTGTGGTCTGGGCAGTCTTACTGTTCTCGGTTACTTGGATCTGGATCCGGCC----- [3776]  
Cli GCTGTGATCTGGGCAGTCCAGCCTGTTCTTGGTTACTTGGCTCTGGAGCTGGCC--GGGGC [4712]  
Gga GCTGTGGTCTG--GCAGTCCAGCCTGTTCTAGGTTACTTGGCTCCGGAGCCCGCC----- [4291]  
Xtr GCTGTAATGTCTCCTGTCCAGCCTTTTCTCGATTACTTGGGACCAGAGCCAATC--CAGCC [4695]  
Lch GCTGTTAGTCACTAGCCAGCCTATTCTTGGATTACTTGGGTCTGGAGACGGCT--TTTGA [5049]  
Dre GCT--TGTGATGTCCGAAAGCCTATTCCGGGATGACTTGGTTCCAGGAATGAGAC--GTTGT [5132]

Hsa TGAGGAGCAGGGCTTAGCT--GC--TTGTGAGCAGGGTCCACACCAA--GTCGTGTTTCACAGT [5001]  
Mmu TGAGGAGCAGGGCTTAGCT--GC--TTGTGAGCAAGGTCCACAGCAAAGTTCGTGTTTCACAGT [5003]  
Mdo TGAGGAGCAGGACTTAGCT--GCCTTGTGAACAGAGTCCAGCATCAT--ATTGTGTTTCACAGT [4690]  
Meu TGAGGAGCAGGACTTAGCT--GCCTTGTGAACAGAGTCCAGCATCAT--ATTGTGTTTCACAGT [4014]  
Oan GGCGGAGCAGGGCTTAGCTGGC--CTGTGAACAG--TTAGTTCCC--TGCGTGTTCACAGT [4247]  
Aca CAAGCCGTAGGGCTTAGCCAC--CTGTGAACAGCATTTGGATTCA--GCCATGTTTCACAGT [4929]  
Pbi CCTAGGGTAGGGCTTAGCTCAC--TTGTGAACAGCGTTTGGTTCA--GCCGTGTTTCACAGT [5005]  
Cpi CGGGGTGCAGGGCTTAGCTCAC--CTGTGAACAGAGTTCGCATCCGTATCGTGTTCACAGT [5339]

---

---

|     |                                                                |          |
|-----|----------------------------------------------------------------|----------|
| Cmy | CGGGGTGCAGGGCTTAGCTCAC--TTGTGAACAGAGTTCGCATCCGCATCGTGTTCACAGT  | [ 5088 ] |
| Psi | -----                                                          | [ 4779 ] |
| Asp | -----                                                          | [ 4620 ] |
| Ami | CAGGGCACAGGGCTTAGCTCAC-CTGTGAACAGAGTTCAGCGTTG-CATCATGTTTCACAGT | [ 4914 ] |
| Asi | CAGGGCACAGGGCTTAGCTCAC-CTGTGAACAGAGTTCAGCGTTG-CATCATGTTTCACAGT | [ 4971 ] |
| Tgu | -----                                                          | [ 3776 ] |
| Cli | CGGGGGCAGGGCTTAGCCAC-CTGTGAACAGAGTCCAGCCGT--GCCGTGTTCACAGT     | [ 4769 ] |
| Gga | -----                                                          | [ 4291 ] |
| Xtr | GGCGGCCAGGGCTTAGCTGTA--TTGTGAGCACTGTCACTCTCG--CACCTGTTCACAGT   | [ 4752 ] |
| Lch | AATGGCACAGAGCTTAGCTATA-TGGAGAGCAGTGTATCTGTCACTATCTTGTTCACAGT   | [ 5108 ] |
| Dre | GTGGTGTCAAGACTTAACCCAC--TTGTGAACAATGCATCGAACT--TCAATGTTCACAGT  | [ 5189 ] |
|     |                                                                |          |
| Hsa | GGCTAAGTTCCGCCCCC-AGGCC--TCTAACAAGGTGCAGAGCTTAGCTGATTGGTGAA    | [ 5058 ] |
| Mmu | GGCTAAGTTCCGCCCCCT-GGACC--TCTAACAAGGTGCAGAGCTTAGCTGATTGGTGAA   | [ 5060 ] |
| Mdo | GGCTAAGTTCCGCTCCCC--TTGCC--TCTGACAAGGTGCAGAGCTTAGCCGATTGGTGAA  | [ 4747 ] |
| Meu | GGCTAAGTTCCGCCCCC-----TCTAACAAGGTGCAGAGCTTAGCTGATTGGGGAA       | [ 4066 ] |
| Oan | GGCTAAGTTCCGCCCCCTCCAGGGC--TCTGTGCGGGCGCAGAGCTTAGCTGATTGGTGAA  | [ 4305 ] |
| Aca | GGCTAAGTTCCGCTGCTT-GGAGT--TCTGGTGAGGTGCAGAGCTTAGCTGATTGGTGAA   | [ 4986 ] |
| Pbi | GGCTAAGTTCCGCCACTT-GGAGT--TCTAGTGAGGTGCAGAGCTTAGCTGATTGGTGAA   | [ 5062 ] |
| Cpi | GGCTAAGTTCCGCCCCC-GGGGT--TCTAACAAGGTGCAGAGCTTAGCTGATTGGTGAA    | [ 5396 ] |
| Cmy | GGCTAAGTTCCGCCCCCT-GGGGT--TCTAATGAGGTGCAGAGCTTAGCTGATTGGTGAA   | [ 5145 ] |
| Psi | -----TCTAACAAGGTGCAGAGCTTAGCTGATTGGTGAA                        | [ 4813 ] |
| Asp | -----TCTAACAAGGTGCAGAGCTTAGCTGATTGGTGAA                        | [ 4654 ] |
| Ami | GGCTAAGTTCCGCCTCCT-GGTGT--TCTGACAAGGTGCAGAGCTTAGCTGATTGGTGAA   | [ 4971 ] |
| Asi | GGCTAAGTTCCGCCTCCT-GGTGT--TCTGACAAGGTGCAGAGCTTAGCTGATTGGTGAA   | [ 5028 ] |
| Tgu | -----TCTGGCGAGGTGCAGAGCTTAGCTGATTGGTGAA                        | [ 3810 ] |
| Cli | GGCTAAGTTCCGCCTCCC-GCCCC--TCTGGCGAGGTGCAGAGCTTAGCTGATTGGTGAA   | [ 4826 ] |
| Gga | -----TCTGGTGAGGTGCAGAGCTTAGCTGATTGGTGAA                        | [ 4325 ] |
| Xtr | GGCTAAGTTCCGCGCCTC-TCTGG--TCTACCAAGGTGCAGAGCTTAGCTGATTGGTGAA   | [ 4809 ] |
| Lch | GGCTAAGTTTAGTGCCCA-AAGAG--TCTGACAAGGTGCAGAGCTTAGCTGACTGGTGAA   | [ 5165 ] |
| Dre | GGTTAAGTTCTGCCGCCCTAGAC--TCTGAGCGGGTGCAGAGCTTAGCTGATTGGTGAA    | [ 5247 ] |
|     |                                                                |          |
| Hsa | CAGTGATTGGTTTTCCGCTTTGTTTCACAGTGGCTAAGTTCTGCACCTGAAGAG-----    | [ 5110 ] |
| Mmu | CAGTGATTGGTTTTCCGCTTTGTTTCACAGTGGCTAAGTTCTGCACCTGAAGAG-----    | [ 5112 ] |
| Mdo | CAGTCACTGATTTCCCTCTTTGTTTCACAGTGGCTAAGTTCTGCACCTGAAGAG-----    | [ 4799 ] |
| Meu | CAGTAATTGATTTCCCTCTTTGTTTCACAGTGGCTAAGTTCTGCACCTGAAGAG-----    | [ 4118 ] |
| Oan | CAGTGATTGCTGGACTCTTTGTTTCACAGTGGCTAAGTTCTGCGCCCGCAGAG-----     | [ 4357 ] |
| Aca | CAGTGATTGATTTCCCTCTTTGTTTCACAGTGGCTAAGTTCTGCACCTAAAGAG-----    | [ 5038 ] |
| Pbi | CAGTGATTGATTTCCCTCTTTGTTTCACAGTGGCTAAGTTCTGCACCTGAAGAG-----    | [ 5114 ] |
| Cpi | CAGTGATTGATTTCCCTCTTTGTTTCACAGTGGCTAAGTTCTGCACCTGAAGAG-----    | [ 5448 ] |
| Cmy | CAGTGATTGATTTCCCTCTTTGTTTCACAGTGGCTAAGTTCTGCACCTGCAGAG-----    | [ 5197 ] |
| Psi | CAGTGATTGATCTCCTCTTTGTTTCACAGTGGCTAAGTTCTGCACCTGAAGAG-----     | [ 4865 ] |
| Asp | CAGTGATTGATCTCCTCTTTGTTTCACAGTGGCTAAGTTCTGCACCTGAAGAG-----     | [ 4706 ] |
| Ami | CAGTGATTGATTTCCCTCTTTGTTTCACAGTGGCTAAGTTCTGCACCTGAAGAG-----    | [ 5023 ] |
| Asi | CAGTGATTGATTTCCCTCTTTGTTTCACAGTGGCTAAGTTCTGCACCTGAAGAG-----    | [ 5080 ] |
| Tgu | CAGTGATTGTTTTCCCTCTTTGTTTCACAGTGGCTAAGTTCTGCACCTGAAGAG-----    | [ 3862 ] |
| Cli | CAGTGATTGTTTTCCCTCTTTGTTTCACAGTGGCTAAGTTCTGCACCTGAGGAG-----    | [ 4878 ] |
| Gga | CAGTGATTGTTTTCCCTCTTTGTTTCACAGTGGCTAAGTTCTGCACCTGAAGAG-----    | [ 4377 ] |
| Xtr | CAGTGATTGATTTCCCTCTTTGTTTCACAGTGGCTAAGTTCTGCACCTGAAGAG--CTAGAG | [ 4867 ] |
| Lch | CAGTAATTGATTTCCCTCTTTGTTTCACAGTGGCTAAGTTCTGCACCTGAGGAG--TTATCG | [ 5223 ] |
| Dre | CGTGCATGGCTTGTGTTTTGTTTCACAGTGGCTAAGTTCTTCACCCGAAAAG--CTCAGC   | [ 5305 ] |
|     |                                                                |          |
| Hsa | -----                                                          | [ 5110 ] |
| Mmu | -----                                                          | [ 5112 ] |
| Mdo | -----                                                          | [ 4799 ] |
| Meu | -----                                                          | [ 4118 ] |
| Oan | -----                                                          | [ 4357 ] |



|     |                                                               |          |
|-----|---------------------------------------------------------------|----------|
| Aca | -----                                                         | [ 5038 ] |
| Pbi | -----                                                         | [ 5114 ] |
| Cpi | -----                                                         | [ 5448 ] |
| Cmy | -----                                                         | [ 5197 ] |
| Psi | -----                                                         | [ 4865 ] |
| Asp | -----                                                         | [ 4706 ] |
| Ami | -----                                                         | [ 5023 ] |
| Asi | -----                                                         | [ 5080 ] |
| Tgu | -----                                                         | [ 3862 ] |
| Cli | -----                                                         | [ 4878 ] |
| Gga | -----                                                         | [ 4377 ] |
| Xtr | AGGCAGGACTTAGCTGGCTCTGTGAACAGGTCTT--GTGTG-TCAATGTTTCACAGTGGCT | [ 4924 ] |
| Lch | GTGCAGGGCTTAGCTTAC-CTGTGAACAGTTAAA--TAGACCTTGTGTTTCACAGTGGCT  | [ 5280 ] |
| Dre | GCGCAGAGCTTAGCTAAT-CGGTGAGCATTGATCCCTTAAGAAAACGTTCACAGTGGCT   | [ 5364 ] |
|     |                                                               |          |
| Hsa | -----TTAGAGGATGACTGATTTCTTTTGGTGTTCAGAGTCAATATAAATT           | [ 5155 ] |
| Mmu | -----TTAGAGGATGACTGATTTCTTTTGGTGTTCAGAGTCAATAGAATT            | [ 5157 ] |
| Mdo | -----TTAGAGGATGACTGATTTCTTTTGGTGTTCAGAGTCAATATCATT            | [ 4844 ] |
| Meu | -----TTAGAGGATGACTGATTTCTTTTGGTGTTCAGAGTCAATATCATT            | [ 4163 ] |
| Oan | -----CTAGAGGATGACTGATTTCTTTTGGTGTTCAGAGTCAATATCATT            | [ 4402 ] |
| Aca | -----TTAAAGGATGACTGATTTCTTCTGGTGTTCGGAGTCTAGTTCTCT            | [ 5083 ] |
| Pbi | -----TTAAAGGATAACTGATTTCTTCTGGTGTTCGGAGTCTATTCTCT             | [ 5159 ] |
| Cpi | -----TTAGAGGATGACTGATTTCTTTTGGTGTTCAGAGTCAATACTATT            | [ 5493 ] |
| Cmy | -----TCAAAGGATGACTGATTTCTTTTGGTGTTCAGAGTCAATACTATT            | [ 5242 ] |
| Psi | -----TTAGAGGATGACTGATTTCTTTTGGTGTTCAGAGTCAATACTATT            | [ 4910 ] |
| Asp | -----TTAGAGGATGACTGATTTCTTTTGGTGTTCAGAGTCAATACTATT            | [ 4751 ] |
| Ami | -----TTAGAGGATGACTGATTTCTTTTGGTGTTCAGAGTCCATACTATT            | [ 5068 ] |
| Asi | -----TTAGAGGATGACTGATTTCTTTTGGTGTTCAGAGTCCATACTATT            | [ 5125 ] |
| Tgu | -----TTAGAGGATGACTGATTTCTTTTGGTGTTCAGAGTCAATAATAAT            | [ 3907 ] |
| Cli | -----TTAGAGGATGACTGATTTCTTTTGGTGTTCAGAGTCAATAATAAT            | [ 4923 ] |
| Gga | -----TTAGAGGATGACTGATTTCTTTTGGTGTTCAGAGTCAATAATAAT            | [ 4422 ] |
| Xtr | AAGTTCACCCCA--TTAAAGGATGACTGATTTCTTCTGGTGTTCAGAGTC--TTTTGTT   | [ 4980 ] |
| Lch | AAGTTCGCATCT--TTAAAGGATGACTGATTTCTTTTGGTGTTCAGAGTCTGTTAT-TT   | [ 5337 ] |
| Dre | AAGTTCAGTGTCT--CCAAACGATGACTGATTTCTTTTGGTGTTCAGAGTCCCATCTGTC  | [ 5422 ] |
|     |                                                               |          |
| Hsa | TTCTAGCACCATCTGAAATCGGTTATAATGATTGGGGA--CTTCAGGAAGCTGGTTTCAT  | [ 5213 ] |
| Mmu | TTCTAGCACCATCTGAAATCGGTTATAATGATTGGGGA--CTTCAGGAAGCTGGTTTCAT  | [ 5215 ] |
| Mdo | TTCTAGCACCATTTGAAATCGGTTATAATGATTGGGGA--CTTCAGGAAGCTGGTTTCAT  | [ 4902 ] |
| Meu | TTCTAGCACCATTTGAAATCGGTTATAATGATTGGGGA--CTTCAGGAAGCTGGTTTCAT  | [ 4221 ] |
| Oan | TTCTAGCACCATTTGAAATCGGTTATAATGATTGGGGA--CTTCAGGAAGCTGGTTTCAT  | [ 4460 ] |
| Aca | TTCTAGCACCATTTGAAATCGGTTATAGTGATTGGGGA--CCTCAGGAAGCTGGTTTCAT  | [ 5141 ] |
| Pbi | TTCTAGCACCATTTGAAATCGGTTATAGTGATTGGGGA--CTTCAGGAATCTGGTTTCAT  | [ 5217 ] |
| Cpi | TTCTAGCACCATTTGAAATCGGTTATAGTGACTGGGGA--CCTCAGGAAGCTGGTTTCAT  | [ 5551 ] |
| Cmy | TTCTAGCACCATTTGAAATCGGTTATAGTGACTGGGGA--CCTCAGGAAGCTGGTTTCAT  | [ 5300 ] |
| Psi | TTCTAGCACCATTTGAAATCGGTTATAGTGACAGGGGA--CCTCAGGAAGCTGGTTTCAT  | [ 4968 ] |
| Asp | TTCTAGCACCATTTGAAATCGGTTATAATGACAGGGGA--CCTCAGGAAGCTGGTTTCAT  | [ 4809 ] |
| Ami | TTCTAGCACCATTTGAAATCGGTTATAGTGATTGGGGA--CTTCAGGAAGCTGGTTTCAT  | [ 5126 ] |
| Asi | TTCTAGCACCATTTGAAATCGGTTATAGTGATTGGGGA--CTTCAGGAAGCTGGTTTCAT  | [ 5183 ] |
| Tgu | TTCTAGCACCATTTGAAATCGGTTATAGTGATTGGGGA--CCTCAGGAAGCTGGTTTCAT  | [ 3965 ] |
| Cli | TTCTAGCACCATTTGAAATCGGTTATAGTGATTGGGGA--CCTCAGGAAGCTGGTTTCAT  | [ 4981 ] |
| Gga | TTCTAGCACCATTTGAAATCGGTTATAGTGATTGGGGA--CCTCAGGAAGCTGGTTTCAT  | [ 4480 ] |
| Xtr | TTCTAGCACCATTTGAAATCGGTTATAATGATGGGGTA--TTTCAGGAGGCTGGTTTCAT  | [ 5038 ] |
| Lch | GTCTAGCACCATTTGAAATCGGTTATAGTGATTGGGGA--CTCCAGGAAGCTGGTTTCAT  | [ 5395 ] |
| Dre | ATCTAGCACCATTTGAAATCGGTTATAATGACTGGGGA--CCTCCAGATGCTGGTTTCAC  | [ 5480 ] |
|     |                                                               |          |
| Hsa | ATGGTGGTTTAGATTTAAATAGTGATTGTCTAGCACCATTTGAAATCAGTGTCTTTGGGG  | [ 5273 ] |
| Mmu | ATGGTGGTTTAGATTTAAATAGTGATTGTCTAGCACCATTTGAAATCAGTGTCTTTGGTG  | [ 5275 ] |



Hsa TAGATTTTTCCATCTTTGTATCTAGCACCATTTGAAATCAGTGTTTTAGGAG--GCGACT [5444]  
Mmu TAGATTTTTCCATCTTTGTATCTAGCACCATTTGAAATCAGTGTTTTAGGAG--GCGACT [5446]  
Mdo TAGATTTTTCCATCTCTGTATCTAGCACCATTTGAAATCAGTGTTTTAGGAG--GCGGCT [5133]  
Meu ----- [4366]  
Oan TAGATTTTTCCATCTCTGTATCTAGCACCATTTGAAATCAGTGTTTTAGGAG--GCGACT [4693]  
Aca TAGATTTTTCCATCTTTGTATCTAGCACCATTTGAAATCAGTGTTCTAGGAG--GCGACT [5374]  
Pbi TAGATTTTTCCATCTCTGTATCTAGCACCATTTGAAATCAGTGTTCTAGGAG--GCGATT [5450]  
Cpi TAGATTTTTCCATCTTTGTATCTAGCACCATTTGAAATCAGTGTTCTAGGAG--GCGACT [5784]  
Cmy TAGATTTTTCCATCTTTGTATCTAGCACCATTTGAAATCAGTGTTCTAGGAG--GCGACT [5531]  
Psi TAGATTTTTCCATCTTTGTATCTAGCACCATTTGAAATCAGTGTTCTAGGAG--GCGACT [5200]  
Asp TAGATTTTTCCATCTCTGTATCTAGCACCATTTGAAATCAGTGTTCTAGGAG--GCGACT [5041]  
Ami TAGATTTTTCCATCTTTGTATCTAGCACCATTTGAAATCAGTGTTCTAGGGG--GCGACT [5359]  
Asi TAGATTTTTCCATCTTTGTATCTAGCACCATTTGAAATCAGTGTTCTAGGGG--GCGACT [5416]  
Tgu TAGATTTTTCCCA--CTTTGTATCTAGCACCATTTGAAATCAGTGTTCTAGGAG--GCGACT [4197]  
Cli TAGATTTTTCCCA--CTTTGTATCTAGCACCATTTGAAATCAGTGTTCTAGGAG--GCGACT [5213]  
Gga TAGATTTTTCCCA--CTTTGTATCTAGCACCATTTGAAATCAGTGTTCTAGGAG--GCGACT [4712]  
Xtr TAGATTTATCCATCGCTGCATCTAGCACCATTTGAAATCAGTGTTCTAGGAG--GCGACT [5272]  
Lch TAGATAGTTCCATCCCTGCATCTAGCACCATTTGAAATCAGTGTTCTAGGAG--GTGACT [5626]  
Dre TAGAGTATTTTA---TGGCATCTAGCACCATTTGAAATCAGTGTTCTGGGC--GCAGTT [5627]

Hsa GTAAACATCCTCGACTGGAAGCTGTGAAGCCACAGATGG--GCTTTCAGTCGGATGTTTG [5502]  
Mmu GTAAACATCCTCGACTGGAAGCTGTGAAGCCACAAATGG--GCTTTCAGTCGGATGTTTG [5504]  
Mdo GTAAACATCCTCGACTGGAAGCTGTGAAGCAGCAGATGGG--GCTTTCAGTCGGATGTTTG [5192]  
Meu ----- [4366]  
Oan GTAAACATCCTCGACTGGAAGCTGTGAAGCAGCAGATGGG--GCTTTCAGTCGGATGTTTG [4752]  
Aca GTAAACATCCTCGACTGGAAGCTGTGAAGCAGTAGATGAA--GCTTTCAGTCGGATGTTTG [5433]  
Pbi GTAAACATCCTCGACTGGAAGCTGTGAAGCAGCAGATGGG--GCTTTCAGTCGGATGTTTG [5509]  
Cpi GTAAACATCCTCGACTGGAAGCTGTGAAGCAGCAGATGGG--GCTTTCAGTCGGATGTTTG [5843]  
Cmy GTAAACATCCTCGACTGGAAGCTGTGAAGCAGCAGATGGG--GCTTTCAGTCGGATGTTTG [5590]  
Psi GTAAACATCCTCGACTGGAAGCTGTGAAGCAGCAGATGGG--GCTTTCAGTCGGATGTTTG [5259]  
Asp GTAAACATCCTCGACTGGAAGCTGTGAAGCAGCAGATGGG--GCTTTCAGTCGGATGTTTG [5100]  
Ami GTAAACATCCTCGACTGGAAGCTGTGAAGCAGCAGATGGG--GCTTTCAGTCGGATGTTTG [5418]  
Asi GTAAACATCCTCGACTGGAAGCTGTGAAGCAGCAGATGGG--GCTTTCAGTCGGATGTTTG [5475]  
Tgu GTAAACATCCTCGACTGGAAGCTGTGAAGCAGCAGATGGG--GCTTTCAGTCGGATGTTTG [4256]  
Cli GTAAACATCCTCGACTGGAAGCTGTGAAGCAGCAGATGGG--GCTTTCAGTCGGATGTTTG [5272]  
Gga GTAAACATCCTCGACTGGAAGCTGTGAAGCAGCAGATGGG--GCTTTCAGTCGGATGTTTG [4771]  
Xtr GTAAACATCCTCGACTGGAAGCTGTGAAGCAGTTGAAGG--GCTTTCAGTCAGATGTTTG [5330]  
Lch GTAAACATCCTCGACTGGAAGCTGTGAAGCAGCAGATGTG--GCTTTCAGTCGGATGTTTG [5685]  
Dre GTAAACATTCCTCGACTGGAAGTTGTAATGCAGAAAATCTCAGCTTTCAGTCTGATGTTTG [5687]

Hsa CAGCTGC--AGATACTGTAAACATCCTACACTCTCAGCTGTG--GAAAGTAAGAAAGCTG [5558]  
Mmu CAGCTGC--AGATATTGTAAACATCCTACACTCTCAGCTGTG--AAAAGTAAGAAAGCTG [5560]  
Mdo CAGCTGC--AGATATTGTAAACATCCTACACTCTCAGCTGTG--GAAAGTCAGAAAGCTG [5248]  
Meu -----AGATATTGTAAACATCCTACACTCTCAGCTGTG--GAAAGTCAGAAAGCTG [4415]  
Oan CAGCTGC--AGGFACTGTAAACATCCTACACTCTCAGCTGTA--GATG--TGAGAAAGCTG [4807]  
Aca CAGCTGC--AGGTAATGTAAACATCCTACACTCTCAGCTGTGTAGATAAGAAGAAAGCTG [5491]  
Pbi CAGCTGC-----TGTAACATCCTACACTCTCAGCTGTGTGGAAAAGAAGAAAGCTG [5561]  
Cpi CAGCTGC--AGGFACTGTAAACATCCTACACTCTCAGCTGTG--GAAAGTAAGGAAGCTG [5899]  
Cmy CAGCTGC--AGGFACTGTAAACATCCTACACTCTCAGCTGTG--GAAAGTAAGGAAGCTG [5646]  
Psi CAACTGC--AGGFACTGTAAACATCCTACACTCTCAGCTGTG--GAAAGTAAGGAAGCTG [5315]  
Asp CAACTGC--AGGFACTGTAAACATCCTACACTCTCAGCTGTG--GAAAATAAGGAAGCTG [5156]  
Ami CAGCTGC--AGGTAATTGTAAACATCCTACACTCTCAGCTGTG--GAAAATGAGGAAGCTG [5474]  
Asi CAGCTGC--AGGTAATTGTAAACATCCTACACTCTCAGCTGTG--GAAAATGAGGAAGCTG [5531]  
Tgu CAGCTGC--AGGTAATTGTAAACATCCTACACTCTCAGCTGTG--GAAACTAAGAAAGCTG [4312]  
Cli CAGCTGC--AGGFACTGTAAACATCCTACACTCTCAGCTGTG--GAAACTAAGAAAGCTG [5328]  
Gga CAGCTGC--AGGFACTGTAAACATCCTACACTCTCAGCTGTG--GAAACTAAGAAAGCTG [4827]

Xtr CAGCTGC--AGATACTGTAAACATCCTACACTCTCAGCTGTG--GAAAT--ACAAAGCTG [ 5384 ]  
Lch CTGCTGC--AGTGCCTGTAAACATCCTACACTCTCAGCTGTG--TATGTGAGCA-AGCTG [ 5740 ]  
Dre CTGCTAC----- [ 5694 ]

Hsa GGAGAAGGCTGTTTACTCTTTCT--TTTGCTACTGTAAACATCCTTGACTGGAAGCTGTA [ 5616 ]  
Mmu GGAGAAGGCTGTTTACTCTCTCT--TTTGCTACTGTAAACATCCTTGACTGGAAGCTGTA [ 5618 ]  
Mdo GGAGAAGGCTGTT-ACTCTGTCT--TTTGCCGCTGTAAACATCCTTGACTGGAAGCTGTA [ 5305 ]  
Meu GGAGAAGGCTGTTTACTCTGTCT--TGTGCCGCTGTAAACATCCTTGACTGGAAGCTGTA [ 4473 ]  
Oan GGAGAAGGCTGTTTACTCTCTCT--TTTGCTACTGTAAACATCCTTGACTGGAAGCTGGA [ 4865 ]  
Aca GGAGAAGGCTGTTTACTCTCTCT--GT-GCTCCTGTAAACATCCTTGACTGGAAGCTGTG [ 5548 ]  
Pbi GGAGAAGGCTGTTTACTCTCTCT--GTTGCTCCTGTAAACATCCTTGACTGGAAGCTGTA [ 5619 ]  
Cpi GGAGAAGGCTGTTTACTCTCTCT--GTTGCTACTGTAAACATCCTTGACTGGAAGCTGTA [ 5957 ]  
Cmy GGAGAAGGCTGTTTACTCTCTCT--GTTGCTACTGTAAACATCCTTGACTGGAAGCTGTA [ 5704 ]  
Psi GGAGAAGGCTGTTTACTCTCTCT--ATTGCTACTGTAAACATCCTTGACTGGAAGCTGTA [ 5373 ]  
Asp GGAGAAGGCTGTTTACTCTTTCT--GTTGCTACTGTAAACATCCTTGACTGGAAGCTGTA [ 5214 ]  
Ami GGAGAAGGCTGTTTACTCTCCCT--GATGCTACTGTAAACATCCTTGACTGGAAGCTGTA [ 5532 ]  
Asi GGAGAAGGCTGTTTACTCTTCCCT--GATGCTACTGTAAACATCCTTGACTGGAAGCTGTA [ 5589 ]  
Tgu GGAGAAGGCTGTTTACTCTCTCT--AGTGCCTCTGTAAACATCCTTGACTGGAAGCTGGA [ 4370 ]  
Cli GGAGAAGGCTGTTTACTCTCCCT--CTTGCTGCTGTAAACATCCTTGACTGGAAGCTGTG [ 5386 ]  
Gga GGAGAAGGCTGTTTACTCTCCCT--ATCGCTGCTGTAAACATCCTTGACTGGAAGCTGTG [ 4885 ]  
Xtr GGGGAAGGCTGTTTACTCTCTCT--ACAGCCTCTGTAAACATCCTTGACTGGAAGCTGTG [ 5442 ]  
Lch GGAGAGGGGTGTTTACTCTCATT----- [ 5763 ]  
Dre -----CGGGCTACTGTAAACATCCTTGACTGGAAGCTGGT [ 5729 ]

Hsa AGGTGTTTCAGAGG-AGCTTTTCAGTCGGATGTTTACAGCGGCA--GTAGTGTGTGTAAACA [ 5673 ]  
Mmu AGGTGTTTCAGAGG-AGCTTTTCAGTCGGATGTTTACAGCGGCA--GTAGTGTGTGTAAACA [ 5675 ]  
Mdo AGGTGCTTTCAGAGG-AGCTTTTCAGTCGGATGTTTACAGCGGCA--GTAGTGTGTGTAAACA [ 5362 ]  
Meu AGGTGCTTTCAGAGG-AGCTTTTCAGTCGGATGTTTACAGCGGCA--GTAGTGTGTGTAAACA [ 4530 ]  
Oan AGGTGCC-GAAGG-AGCTTTTCAGTCGGATGTTTACAGCGGCA--GTGGGGGGTGTAAACA [ 4921 ]  
Aca CAAGGCTCAAAGG-GGCTTTTCAGTCGGATGTTTACAGCGGCA--GCAGCGCATGTAAACA [ 5605 ]  
Pbi CA-GGCTCAAAGA-GGCTTTTCAGTCGGATGTTTACAGCGGCA-----TGTAACA [ 5667 ]  
Cpi AGGTGCTAGAAGGGAGCTTTTCAGTCGGATGTTTACAGCGGCA--GTAGCATGTGTAAACA [ 6015 ]  
Cmy AGGTGCTAGAAGGGAGCTTTTCAGTCGGATGTTTACAGCGGCA--GTAGCATGTGTAAACA [ 5762 ]  
Psi AGGTGTTAGAAGGGAGCTTTTCAGTCGGATGTTTACAGCGGCA--GTAGCATGTGTAAACA [ 5431 ]  
Asp AGGTGTTAGAAGGGAGCTTTTCAGTCGGATGTTTACAGCGGCA--GTAGCATGTGTAAACA [ 5272 ]  
Ami AGGTGCTAGAAGG-AGCTTTTCAGTCGGATGTTTACAGCGGCA--GTAGCATGTGTAAACA [ 5589 ]  
Asi AGGTGCTAGAAGG-AGCTTTTCAGTCGGATGTTTACAGCGGCA--GTAGCATGTGTAAACA [ 5646 ]  
Tgu AGG-GCTGGAAGG-AGCTTTTCAGTCGGATGTTTACAGCAGCA--GTAGCACGTGTAAACA [ 4426 ]  
Cli AGGTGCGAGCAGG-AGCTTTTCAGTCGGATGTTTGCAGCAGCA--GTAGCACGTGTAAACA [ 5443 ]  
Gga AGGTGTCAGCGGG-GGCTTTTCAGTCGGATGTTTACAGCTGCA--GTAGCACGTGTAAACA [ 4942 ]  
Xtr AAATAATGATAGT-AGCTTTTCAGTCGGATGTTTACAGCTGCT--GCAGTGATTGTAAACA [ 5499 ]  
Lch -----ACAGACAATGTAAACA [ 5779 ]  
Dre GCACA-TGATGG--AGCTTTTCAGTCGGATGTTTGCAGCAGCC--TCAGGGAGTGTAAACA [ 5784 ]

Hsa TCCTACACTCTCAGCTGTGAGCTCAAGGTG-GCTGGGAGAGGGTGTGTTTACTCCTTC--T [ 5730 ]  
Mmu TCCTACACTCTCAGCTGTGAGCTCAAGGTG-GCTGGGAGAGGGTGTGTTTACTCCTTC--T [ 5732 ]  
Mdo TCCTACACTCTCAGCTGTGAGCTCAAGGTG-GCTGGGAGAGGGCTGTGTTTACTCCTTC--T [ 5419 ]  
Meu TCCTACACTCTCAGCTGTGAGCTCAAGGTG-GCTGGGAGAGGGCTGTGTTTACTCCTTC--T [ 4587 ]  
Oan TCCTACACTCTCAGCTGTCAAGTCAAGGAG-GCTGGGAGAGGGTGTGTTTACTCCTTC--T [ 4978 ]  
Aca TCCTACACTCTCAGCTGTGAATTTGTGGTG-GCTGGGAGAAGGTGTGTTTACACCTTC--T [ 5662 ]  
Pbi TCCTACACTCTCAGCTGTGACTTTGTGGTG-GCTGGGAGAAGGTGTGTTTACGCCTCC--T [ 5724 ]  
Cpi TCCTACACTCTCAGCTGTGGACTCAAGGTA-GCTGGGAGAGGGTGTGTTTACTCCTTC--T [ 6072 ]  
Cmy TCCTACACTCTCAGCTGTGGACTTAAGGTG-GCTGGGAGAGGGTGTGTTTACTCCTTC--T [ 5819 ]  
Psi TCCTACACTCTCAGCTGTGGACTCAAGGTG-GCTGGGAGAGGGTGTGTTTACTCCTTC--T [ 5488 ]  
Asp TCCTACACTCTCAGCTGTGGACTCAAGGTG-GCTGGGAGAGGGTGTGTTTACTCCTTC--T [ 5329 ]  
Ami TCCTACACTCTCAGCTGTGAACCTCAAGGTG-GCTGGGAGAGGGTGTGTTTACGCCTTC--T [ 5646 ]  
Asi TCCTACACTCTCAGCTGTGAACCTCAAGGTG-GCTGGGAGAGGGTGTGTTTACGCCTTC--T [ 5703 ]

Tgu TCCTACACTCTCAGCTGTGAACTCGAGGTG-GCTGGGAGAGGATTGTTTACGCCTTC--T [4483]  
Cli TCCTACACTCTCAGCTGTGAACT-GAGGTG-GCTGGGAGAGGATTGTTTACTCCTTC--C [5499]  
Gga TCCTACACTCTCAGCTGTGAACTCGAGGTG-GCTGGGAGAGGATTGTTTACGCCTTC--T [4999]  
Xtr TCCTACACTCTCAGCTGTGAACTAAGGTG-GCTGGGAGAGGATTGTTTACTCCCCC--T [5556]  
Lch TCCTACACTCTCAGCTGTGGCAAGTAAAGGAGCTGGGAGAAGGATGTTTACGCCTTC--T [5837]  
Dre TCCTACACTCTCAGCTGGAGCGCAGCCGAG-GCCGGGAGTGGGATGTTTGCCTCTC--C [5841]

Hsa GTTGTGTGTAACATCCCCGACTGGAAGCTGTAA---GACACAGCTAAGCTTTTCAGTCAGA [5787]  
Mmu GTGTCTGTAAACATCCCCGACTGGAAGCTGTAA---GCCACAGCCAAGCTTTTCAGTCAGA [5789]  
Mdo GTTGTGTGTAACATCCCCGACTGGAAGCTGTAA---GACACAGCCAAGCTTTTCAGTCAGA [5476]  
Meu GTCGTTGTAAACATCCCCGACTGGAAGCTGTAA---GACACAGCCAAGCTTTTCAGTCAGA [4644]  
Oan GTGGCTGTAAACATCCCCGACTGGAAGCTGTAA---AATACCTTCAAGCTTTTCAGTCAGA [5035]  
Aca GTTGTGTGTAACATCCCCGACTGGAAGCTGTAA-----ATTTTCAGCTTTTCAGTCAGA [5714]  
Pbi GTTGTGTGTAACATCCCCGACTGGAAGCTGGAA-----AATGTAGCTTTTCAGTCCGA [5776]  
Cpi GTTGTGTGTAACATCCCCGACTGGAAGCTGTAA---GAGAAATTTCTAGCTTTTCAGTCAGA [6129]  
Cmy GTTGTGTGTAACATCCCCGACTGGAAGCTGTAA---GAGAAATTTCTAGCTTTTCAGTCAGA [5876]  
Psi GTTGTGTGTAACATCCCCGACTGGAAGCTGTAA---GACACATTTCTAGCTTTTCAGTCAGA [5545]  
Asp GTTGTGTGTAACATCCCCGACTGGAAGCTGTAA---GACAAATTTCTAGCTTTTCAGTCAGA [5386]  
Ami GTTGTGTGTAACATCCCCGACTGGAAGCTGTAA---GAGAAATTTCTAGCTTTTCAGTCAGA [5703]  
Asi GTTGTGTGTAACATCCCCGACTGGAAGCTGTAA---GAGAAATTTCTAGCTTTTCAGTCAGA [5760]  
Tgu GTTGTGTGTAACATCCCCGACTGGAAGCTGTAC-----CTGCTCCAGCTTTTCAGTCAGA [4537]  
Cli GGTGCTGTAAACATCCCCGACTGGAAGCTGTTTC-----CCGTCCAGCTTTTCAGTCAGA [5552]  
Gga GTTGTGTGTAACATCCCCGACTGGAAGCTGTAG-----CAGCTTGAGCTTTTCAGTCAGA [5053]  
Xtr GTCGCTGTAAACATCCCCGACTGGAAGCTGTGAG--GCTGCATTTGAGCTTTTCAGTCTGG [5614]  
Lch GTTGTGTGTAACATCCCCGACTGGAAGCTGTAAA--TCATGACGACAGCTTTTCAGTCAGA [5895]  
Dre ATGCCTGTAAACATCCCCGACTGGAAGCTGTGCTACGCGGAAAACGAGCTTTTCAGTTGGA [5901]

Hsa TGTTTTGCTGCTACC--TCAGTTCATGTAAACATCCTACACTCAGCTGTAATACA-TGGAT [5844]  
Mmu TGTTTTGCTGCTACT--TCAGTTCATGTAAACATCCTACACTCAGCTGTCATACA-TGCGT [5846]  
Mdo TGTTTTGCTGCTACC--CCAGTTCATGTAAACATCCTACACTCAGCTGTAACACA-TGGAT [5533]  
Meu TGTTTTGCTGCTACC--CCAGTTCATGTAAACATCCTACACTCAGCTGTAACACA-TGA-T [4700]  
Oan TGTTTTGCTACCCT--CGAGTTCATGTAAACATCCTACACTCAGCTGTGACCCA-CCCAG [5092]  
Aca TGTTTTGCTGCCACC--TTAGTTCATGTAAACATCCTACACTCAGCTGTATCACA-TGAAA [5771]  
Pbi TGTTTTGCTGCCGCC--TTAGTTCATGTAAACATCCTACACTCAGCTTTATCACA-TGAAA [5833]  
Cpi TGTTTTGCTGCATCC--TTAGTTCATGTAAACATCCTACACTCAGCTATAAAAACA-TAGAA [6186]  
Cmy TGTTTTGCTGCATCC--TTAGTTCATGTAAACATCCTACACTCAGCTGTAAAACA-TGGAA [5933]  
Psi TGTTTTGCTGCATCC--TTAGTTCATGTAAACATCCTACACTCAGCTATAACACA-TGAAA [5602]  
Asp TGTTTTGCTGCATCC--TTAGTTCATGTAAACATCCTACACTCAGCTATAACACA-TGAAA [5443]  
Ami TGTTTTGCTGCCACT--TTAGTTCATGTAAACATCCTACACTCAGCTATAACAAC-TGGAA [5760]  
Asi TGTTTTGCTGCCACT--TTAGTTCATGTAAACATCCTACACTCAGCTATAACAAC-TGGAA [5817]  
Tgu TGTTTTGCTGCACCT--TTAGTTCCTGTAAACATCCTACACTCAGCTATTATAAAG-TGGTG [4594]  
Cli TGTTTTGCTGCACCT--TTAGTTCCTGTAAACATCCTACACTCAGCTATAACAAG-TGGTG [5609]  
Gga TGTTTTGCTGCACCT--TTAGTTCCTGTAAACATCCTACACTCAGCTATAACAAG-TGGTA [5110]  
Xtr TGTTTTGCTGCTACC--TTAGTCTATGTAAACATCCTACACTCAGCTCGTATGTA-TAACC [5671]  
Lch TGTTTTGCTGAGTCT--CCAGTCCATGTAAACATCCTACACTCAGCTGTAACACA-GGGAA [5952]  
Dre TGTTTTGCTGTCATC--GTAGTCGCTGTAAACATCCTACACTCAGCTGTGAGCTGCAGACG [5959]

Hsa TGGCTGGGAGGTGGATGTTTACTTTCAGC--CTTGGAAGTGGAGAGGAGGCAAGATGCTGG [5902]  
Mmu TGGCTGGGATGTGGATGTTTACGTCAGC--CTCGGAAGTGGAGAGGAGGCAAGATGCTGG [5904]  
Mdo CGGCTGGGAGGTGGATGTTTACTTTCAGC--TTCAGAGCTGGAGAGGAGGCAAGATGTTGG [5591]  
Meu TGGCTGGGAGGTGGATGTTTACTTTCAGC--TTCAGAGCTGGAGAGGAGGCAAGATGTTGG [4758]  
Oan CGGCTGGGAGGGGGATGTTTGTCTTCAAC--CTCAGAGCTGGAGAGAAGGCAAGATGTTGG [5150]  
Aca TGGCTGGGAGATGAATGTTTACTTTCAGC--TTCAGAGCTGGAGCGGAGGCAAGATGTTGG [5829]  
Pbi TGGCTGGGAGATGGAAGTTTACTTTCAGC--TTGAGAGCTGGAGAGGAGGCAAGATGTTGG [5891]  
Cpi CGGCTGGGAGGTGGATGTTTACTTTCAGC--ATCAGACTTTGAGGGGAGGCAAGATGTTGG [6244]  
Cmy CGGCTGGGAGGTGGATGTTTACTTTCAGC--ATCAGACTTTGAGGGGAGGCAAGATGTTGG [5991]  
Psi CGGCTGGGAGGTGGATGTTTACTTTCAGC--CTCAGACTTTGAGGGGAGGCAAGATGTTGG [5660]

Asp CGGCTGGGAGATGGATGTTTACTTCAAC--CTCAGACGTGGAGGGGAGGCAAGATGTTGG [5501]  
Ami CGGCTGGGAGGTGGATGTTTACTTCAAC--TTCAGAGCTAGAGAGGAGGCAAGATGTTGG [5818]  
Asi CGGCTGGGAGGTGGATGTTTACTTCAAC--TTCAGAGCTAGAGAGGAGGCAAGATGTTGG [5875]  
Tgu GGGCTGGGGGTGGGTGTTTACTTCAAC--TGCAGAGCTGGAGAGGAGGCAAGATGTTGG [4652]  
Cli GGGCTGGGGGTAGATGTTTACATCAAC--TGCAGAGCTGGAGGGGAGGCAAGATGTTGG [5667]  
Gga GGGCTGGGGGTGGATGTTTACTTCAAC--TGCAGAGCTGGAGGGGAGGCAAGATGTTGG [5168]  
Xtr TGACTGGGTGGGGGTGTTTGCCTCGAC--CCTAGTTCTAGAGAGGAGGCAAGATGTTGG [5729]  
Lch AGACTGGGAGAAGGGTGTCTTACTTCGGC--CTCAGAGCTGGAGAGGAGGCAAGATGTTGG [6010]  
Dre AGGCTGGGCGGAGGGTGTCTTGTGTGAC--TCTGGAAGAGAAGAGATGGCAAGATGTTGG [6017]

Hsa CATAGCTGTTGAA--CTGGGAACCTGCTATGCCAACATATTGCCATCTTTTCTGTCTG-- [5958]  
Mmu CATAGCTGTTGAA--CTGAGAACCTGCTATGCCAACATATTGCCATCTTTTCTGTCTG-- [5960]  
Mdo CATAGCTGTTGAA--CTGAGAACCTGCTATGCCAACATATTGCCATCTTTTCTGTCTA-- [5647]  
Meu CATAGCTGTTGAA--CTAAGAACCTGCTATGCCAACATATTGCCATCTTTTCTGTCTA-- [4814]  
Oan CATAGCTGTTGAG--TTAAGAACCTGCTATGCCGACATGTTGTCATCTTTTCTGTCTA-- [5206]  
Aca CATAGCTGATGAG--TTAAGAACCTGCTATGCCAACATATTGCCCTCTTTTCTGTCTG-- [5885]  
Pbi CATAGCTGATGAA--CTGAGAACCTGCTATGCCAACATATTGCCCTCTTTTACCTCTG-- [5947]  
Cpi CATAGCTGTTGAC--CTAATAACCTGCTATGCCAACATATTGTCATCTTTTCTGTCTA-- [6300]  
Cmy CATAGCTGTTGAC--CTAATAACCTGCTATGCCAACATATTGTCATCTTTTCTGTCTA-- [6047]  
Psi CATAGCTGTTGAT--CTAAAAACCTGCTATGCCAACGTAATTGCCATCTTTTCTGTCTA-- [5716]  
Asp CATAGCTGTTGAT--CTAAAAACCTGCTATGCCAACGTAATTGCCATCTTTTCTGTCTA-- [5557]  
Ami CATAGCTGTTGAC--CTAAGAACCTGCTATGCCAACATCTTGTCTA-- [5874]  
Asi CATAGCTGTTGAC--CTAAGAACCTGCTATGCCAACATCTTGTCTA-- [5931]  
Tgu CATAGCTGTTGAT--CTAAAAACCTGCTATGCCAACATATTGTCATCTTTTCTGTCTG-- [4708]  
Cli CATAGCTGTAGAC--CTAAAAACCTGCTATGCCAACATATTGTCATCTTTTCTGTCTG-- [5723]  
Gga CATAGCTGTTAAC--CTAAAAACCTGCTATGCCAACATATTGTCATCTTTTCTGTCTG-- [5224]  
Xtr CATAGCTGTTGCA--TCTGAAACCAGTTGTGCCAACCTATTGCCATCTTTTCTGTCTA-- [5785]  
Lch CATAGCTGTTGTG--TCAAGAACCTGCTATGCCAATATATTGTCATCTTTTCTGTCTA-- [6066]  
Dre CATAGCTGTTAATGTTTATGGGCCTGCTATGCCCTCCATATTGCCATTTTCTGCACTTCC-- [6075]

Hsa AGATATTGCACATTACTAAGTTGCATGTTGTGACGGCCTCAATGCAATTTAGTGTGTGTG [6018]  
Mmu AGATATTGCACATTACTAAGTTGCATGTTGTGACGGCCTCAATGCAATTTAGTGTGTGTG [6020]  
Mdo AGATATTGCACATTACTAAGTTGCATGTTGTGACGGCTTTAGTGTGCAATTTAGTGTGTGTG [5707]  
Meu AGATATTGCACATTACTAAGTTGCATGTTGTGACGGCCTTGGTGTGCAATTTAGTGTGTGTG [4874]  
Oan AGATATTGCACATTACTAAGTTGCATGTTGTGCAAGGCCTCTGTGCAATTTAGTGTGTGTGCG [5266]  
Aca GGATATTGCACATTACTAAGTTGCATGTTGTGACGGGCTCAGTGTGCAATTTAGTGTGTGTGCG [5945]  
Pbi TGATATTGCACATTACTAAGTTGCATGTTGTGACGGCCTCAGTGTGCAATTTAGTGTGTGTG [6007]  
Cpi AGATATTGCACATTACTAAGTTGCATGTTGTGACGGCCTCAGTGTGCAATTTAGTGTGTGTGCG [6360]  
Cmy AGATATTGCACATTACTAAGTTGCATGTTGTGACGGCCTCAGTGTGCAATTTAGTGTGTGTGCG [6107]  
Psi AGATATTGCACATTACTAAGTTGCATGTTGTGACGGCCTCAGTGTGCAATTTAGTGTGTGTGCG [5776]  
Asp AGATATTGCACATTACTAAGTTGCATGTTGTGACGGCCTCAGTGTGCAATTTAGTGTGTGTGCG [5617]  
Ami ATATATTGCACATTACTAAGTTGCATGTTGTGACGGCCTCAGTGTGCAATTTAGTGTGTGTGCG [5934]  
Asi ATATATTGCACATTACTAAGTTGCATGTTGTGACGGCCTCAGTGTGCAATTTAGTGTGTGTGCG [5991]  
Tgu AGATATTGCACATTACTAAGTTGCACGTTCTCAGGGCCTCAGTGTGCAATTTAGTGTGTGTGCG [4768]  
Cli AGATATTGCACATTACTAAGTTGCATGTTGTGACGGCCTCAGTGTGCAATTTAGTGTGTGTGCG [5783]  
Gga AGATATTGCACATTACTAAGTTGCATGTTGTGACGGCCTCAGTGTGCAATTTAGTGTGTGTGCG [5284]  
Xtr ----- [5785]  
Lch AGATATTGCACATTACCAAGTTGCATGTCATCAGGGCCTCAGTGTGCAACTTAGTGTGTGTGCG [6126]  
Dre ----- [6075]

Hsa ATATTT--GGCGGGCAGCTGTGGTGCATTTGTAGTTGCATTTGCATGTTCTGGTGGTACCCA [6076]  
Mmu ATATTT--GGCGGGCAGCTGTGGTGCATTTGTAGTTGCATTTGCATGTTCTGGCAATACCTG [6078]  
Mdo ATATTT--AGCGAGCGGCTGGGGTGCATTTGTAGTTGCATTTGCACGTCGTGTC--CGGGCCG [5764]  
Meu ATATTT--TGCGGGCGGCTGGGGTGCATTTGTAGTTGCATTTGCACGTCGTGTC--GGGCCG [4930]  
Oan ATATTT--GGTTGGCCACTGTCGTGCATTTGTAGTTGCATTTGCACGTTCCGGCAGTACTGG [5324]  
Aca ATATTT--GGGTGGCAGCTGTAGTGCATTTGTAGTTGCATTTGCATGTTCTAGCAGTATTTG [6003]  
Pbi ATATTT--GGGTGGCAACTGTAGTGCATTTGTAGTTGCATTTGCATGTTCTGGCAATACTCA [6065]

```
Cpi ATATTT--GGGGGGCAGCTGTAGTGCATTGTAGTTGCATTGCATGTTCTGGCAGTACTTG [6418]
Cmy ATATTT--GGGGGGCAGCTGTGCGTGCATTGTAGTTGCATTGCACGTTCTGGCCATACTTG [6165]
Psi ATATTT--GGGGGGCAGCTGTAGTGCATTGTAGTTGCATTGCATGTTCTGGCAGTATTTG [5834]
Asp ATATTT--GGGGGGCAGCTGTAGTGCATTGTAGTTGCATTGCATGTTCTGGCAGTATTTG [5675]
Ami ATATTT--GGGTGACCGCTGTAGTGCATTGTAGTTGCATTGCATGTTCTGGTAGTATCTG [5992]
Asi ATATTT--GGGTGACCGCTGTAGTGCATTGTAGTTGCATTGCATGTTCTGGTAGTATCTG [6049]
Tgu ATACTT--GGGTGGCAGCTGTAGTGCATTGTAGTTGCATTGCATGTTGTGGCAGTACTG [4826]
Cli ATACTT--GGGTGGCAGCTGTAGTGCATTGTAGTTGCATTGCATGTTGTGGCAGTAACTG [5841]
Gga ATACTT--GGGTGGCAGCTGTAGTGCATTGTAGTTGCATTGCATGTGCTGGCAGTAACTG [5342]
Xtr -----TTGGGGTACCCCTGGTGCATTGTTGTTGCATTGCATGTCACCTTGGACGTTG [5837]
Lch ATATTT--TGGAGACAGCTGTGGTGCATTGTAGTTGCATTGCATGTTGGAGCTGCAAGTG [6184]
Dre ----- [6075]

Hsa TGCAATGTTTCCACAGTGCATCACAGAGGCCCTGCC--CGGGCGGCCCCGCGGTGCATTGC [6134]
Mmu TGCAATGTTTCCACAGTGCATCACGGAGGCCCTGCC----- [6113]
Mdo TGCAATGTTTCCACAGTGCATCCCAGAGGCCCGCG----- [5799]
Meu TGCAATGTTCCCGCAGTGCATCCCAGAGGCCCGCA----- [4965]
Oan TGCAATGTTCCACAGTGCATTACAGAGACCCGCT--CGGCTGCCGCTGTAGTGCATTGT [5382]
Aca TGCAATGTTTCCCGCAGTGCATACAGAGGCATACC--TGGCAGTTTCGGGGGTGCATTGT [6061]
Pbi TGCAATGTTTCTGCAGTGCAGTTCAGAGGCATGCC--TGGCTGTGTCGGTGGTGCATTGT [6123]
Cpi TGCAATGTTTCTGCAGTGCAGTACAGAGGCACTCT--TGGCCGAGCTGTGGTGCATTGT [6476]
Cmy TGCAATGTTTCTGCAGCGCAGCACAGAGGCACTCT--TGGCCGAGCTGTGGTGCATTGT [6223]
Psi TGCAATGTTTCTGCAGTGCAGTACAGAGGCACTCT----- [5869]
Asp TGCAATGTTTCTGCAGTGCAGTACAGAGGCACTCT----- [5710]
Ami TGCAATGTTTCTGCAGTGCAGTATAGAGGCACTCT--TGGCCTCAGCTGTGGTGCATTGT [6050]
Asi TGCAATGTTTCTGCAGTGCAGTACAGAGGCACTCT--TGGCCTCAGCTGTGGTGCATTGT [6107]
Tgu TGCAATGTTTCTGCAGTGCAGTACAGAGGCACTCT----- [4861]
Cli TGCAATGTTCCCTGCAGTGCAGTACAGAGGCACTCT--CGGCCCTCGCGGGGGTGCATTGT [5899]
Gga TGCAATGTTCCCTGCAGTGCAGTACAGAGGCGCTTT--CGGCCCTCGCGGGGGTGCATTGT [5400]
Xtr TGCAATGTTTCTTCAGTGCAGTATGGTGGTTCAG--TGA CTGCCGCTGTGGTGCATTGT [5895]
Lch TGCAATGTGTCTGCAGTGCAGTACAGAGAATCTCC--TAGCTGCAGCTGTGGTGCATTGT [6242]
Dre ----- [6075]

Hsa TGTTGCATTGCACGTGTGTGAG-GCGGGTGCAGTGCCTCGGCAGTGCAGCCCGGAGCCGG [6193]
Mmu ----- [6113]
Mdo ----- [5799]
Meu ----- [4965]
Oan AGTTGCATTGCATGTGTCTGAC-CAGGGTGCATGCCCCCTGCAGTGCATACAGAGCCAG [5441]
Aca AGTTGCATTGCATGTGT-GGCCAAGCTGTGCAATGCCCCCTCCAGTGCAGCCCTGAGGCCG [6120]
Pbi AGTTGCATTGCACGTGCAGGTGAAGATGTGCAATGCCCCCTCCAGTGCAGCCCTGGGGCAG [6183]
Cpi AGTTGCATTGCATGTGTGAGAACAGGTGTGCAATGCCCCCTGCAGTGCAGCCAGATGGGG [6536]
Cmy AGTTGCATTGCATGTGTGAGAACAGGTGTGCAATGCCCCCTGCAGTGCAGCCAGATGGGG [6283]
Psi ----- [5869]
Asp ----- [5710]
Ami AGTTGCATTGCATGTGTACAG-AGGTGTGCAATGCCTCTGCAGTGCAGCCAGAGGAGG [6109]
Asi AGTTGCATTGCATGTGTACAG-AGGTGTGCAATGCCTCTGCAGTGCAGCCAGAGGAGG [6166]
Tgu ----- [4861]
Cli AGTTGCATTGCATGTGTGACTGGGAGTGCATGCCCCCTGCCATGCAGCCCGGCGGGGG [5959]
Gga AGTTGCATTGCATGTGTGACTGGGAGTGCATGCCCCCTGCCATGCAGCCCGGCGGGGG [5460]
Xtr AGTTGCATTGCATGTGATATCAGCGGTGTGCAATGTGCCCTGCAGTGCACACAGAGGTAG [5955]
Lch AGTTGCATTGCATGTGTCTGTGAGGTTGTGCAATGCACCTGCAATGCAATACGGAGTCTG [6302]
Dre ----- [6075]

Hsa CCCC--GTGTTTCTTTGGCAGTGTCTTAGCTGGTTGTTGTGAGCAATAGT-AAGGAAGCA [6250]
Mmu -----GTAATTCTTTGGCAGTGTCTTAGCTGGTTGTTGTGAGTATAGCTAAGGAAGCA [6167]
Mdo -----GTGTTTCTTTGGCAGTGTCTTAGCTGGTTGTTGTGAGTAATAGATAAGGAAGCA [5853]
Meu -----GTGTTTCTTTGGCAGTGTCTTAGCTGGTTGTTGTGAGTAATACATGAGGAAGCA [5019]
```

Oan CCCC----- [ 5445 ]  
Aca TCCT--GTGTTTCTTTGGCAGTGTCTTAGCTGGTTGTTGTGCGCAGTGATTGAGGAAGCA [ 6178 ]  
Pbi CATC--GTGCTTCTTTGGCAGTGTCTTAGCTGGTTGTTGTGTGCGATGATTGAAGCAGCA [ 6241 ]  
Cpi CTTC--GTGTTTCTTTGGCAGTGTCTTAGCTGGTTGTTGTGAGCAATAATCAAGGAAGCA [ 6594 ]  
Cmy CTTC--GTGTTTCTTTGGCAGTGTCTTAGCTGGTTGTTGTGAGCAATAATCAAGGAAGCA [ 6341 ]  
Psi -----GTGTTTCTTTGGCAGTGTCTTAGCTGGTTGTTGTGAGCAATAATCAAGGAAGCA [ 5923 ]  
Asp -----GTGTTTCTTTGGCAGTGTCTTAGCTGGTTGTTGTGAGCAATAATCAAGGAAGCA [ 5764 ]  
Ami CTCC--GTGTTTCTTTGGCAGTGTCTTAGCTGGTTGTTGTGAACAATAGACAAGGAAGCA [ 6167 ]  
Asi CTCC--GTGTTTCTTTGGCAGTGTCTTAGCTGGTTGTTGTGAACAATAGACAAGGAAGCA [ 6224 ]  
Tgu -----GTGTTTCTTTGGCAGTGTCTTAGCTGGTTGTTGTGAGCAATAGTCAAGGAAGCA [ 4915 ]  
Cli CCCC--GTGTTTCTTTGGCAGTGTCTTAGCTGGTTGTTGTGAGCAATAGTCAAGGAAGCA [ 6017 ]  
Gga TCCC--GTGTTTCTTTGGCAGTGTCTTAGCTGGTTGTTGTGAGCAATAGTAAAGGAAGCA [ 5518 ]  
Xtr TGCC--GTGTTTCTTTGGCAGTGTCTTAGCTGGTTGTTGTGGCACGTTATAGAAGTAGCA [ 6013 ]  
Lch GCTA--GTGTTTCTTTGGCAGTGTCTTAGCTGGTTGTTGTGACAAGTAATAGAAAAGCA [ 6360 ]  
Dre -----GTGGTTCTCTGGCAGTGTCTTAGCTGGTTGTTGTGTGGAGTGAG-AACGAAGCA [ 6128 ]

Hsa ATCAGCAAGTATACTGCCCTAGAAGTG--GCTCGGTTTGTAGGCAGTGTGATTTAGCTGAT [ 6308 ]  
Mmu ATCAGCAAGTATACTGCCCTAGAAGTG--GCTCGGTTTGTAGGCAGTGTGATTTAGCTGAT [ 6225 ]  
Mdo ATCAGCAAGTATACTGCCCTAGAAGTG--GCTCGGTTTGTAGGCAGTGTAGTTAGCTGAT [ 5911 ]  
Meu ATCAGCAAGTATACTGCCCTAGAAGTG--GCTCGGTTTGTAGGCAGTGTAGTTAGCTGAT [ 5077 ]  
Oan -----GCTCGGTTTGTAGGCAGTGTAGTTAGCTGAT [ 5476 ]  
Aca ATCAGCAAGAATACTGCCCCAGAAGTG--GCTTGGTTTGTAGGCAGTGTAGTTAGCTGAT [ 6236 ]  
Pbi ATCAGCAAGCATACTGCTGCAGAAGTA--GTTTGGTTTGTAGGCAGTGTAGTTAGCTGAT [ 6299 ]  
Cpi ATCAGCAAGTATACTGCCCTAGAAGTG--GTTTGGTTTGTAGGCAGTGTAGTTAGCTGAT [ 6652 ]  
Cmy ATCAGCAAGTATACTGCCCTAGAAGTG--GTTTGGTTTGTAGGCAGTGTAGTTAGCTGAT [ 6399 ]  
Psi ATCAGCAAGTATACTGCCCTAGAAGTG--GTTTGGTTTGTAGGCAGTGTAGTTAGCTGAT [ 5981 ]  
Asp ATCAGCAAGTATACTGCCCTAGAAGTG--GTTTGGTTTGTAGGCAGTGTAGTTAGCTGAT [ 5822 ]  
Ami ATCAGCAAGTATACTGCCCTAGAAGTG--GTTTGGTTTGTAGGCAGTGTAGTTAGCTGAT [ 6225 ]  
Asi ATCAGCAAGTATACTGCCCTAGAAGTG--GTTTGGTTTGTAGGCAGTGTAGTTAGCTGAT [ 6282 ]  
Tgu ATCAGCAAGTATACTGCCCTAGAAGTG--GCTTGGTTTGCAGGCAGTGTAGTTAGCTGAT [ 4973 ]  
Cli ATCAGCAAGTATACTGCCCTAGAAGTG--GCTTGGTTTGTAGGCAGTGTAGTTAGCTGAT [ 6075 ]  
Gga ATCAGCAAGTATACTGCCCTAGAAGTG--GCTTGGTTTGCAGGCAGTGTAGTTAGCTGAT [ 5576 ]  
Xtr ATCAGCAAATATACTGCCCTAGAAGTT--GTTGGGTTTTCAGGCAGTGTAGTTAGCTGAT [ 6071 ]  
Lch ATCAGCAAGTATACTGCTGCAGAAATG--GCTTAGTTTGTAGGCAGTGTAGTTAGCTGAT [ 6418 ]  
Dre ATCAGCAAGTATACTGCCCGAGAAACT--GGTTGGTCTGTAGGCAGTGTGTTAGCTGAT [ 6186 ]

Hsa TGTACTG---TGGTGGTTACAATCACTAACTCCACTGCCATCAAAAACA--GTCTAGTTAC [ 6363 ]  
Mmu TGTAGTG---CGGTGCTGACAATCACTAACTCCACTGCCATCAAAAACA--GTCTAGTTAC [ 6280 ]  
Mdo TGTATTC---TACTGCCTACAATCACTAACTCCACTGCCATCAAAAACA--GTCTAGTTAC [ 5966 ]  
Meu TGTATTC---TACTGCCTGCAATCACTAACTCCACTGCCATCAAAAACA----- [ 5122 ]  
Oan TGGACCA---TCCCGCCGCAATCACTAACTCCACTGCCATCAAAAACA--GTCTAGTTAC [ 5531 ]  
Aca TGTGAGG---TTTCTTTGGCAATCACTAGCTTTACTGTCATCAAAAACA--GCCTGGTTGC [ 6291 ]  
Pbi TGTGTG---TCTCCCCAGCAATCACTAGCTTCACTGTCATCAAAAACA--GCCTTGTAC [ 6353 ]  
Cpi TGTATCC---ATCTCTTTGCAATCACTAACTTTACTGCCATCAAAAACA--GCCTAGTTAC [ 6707 ]  
Cmy TGTATCC---ATCTCTTTGCAATCACTAACTTTACTGCCATCAAAAACA--GCCTAGTTAC [ 6454 ]  
Psi TGTATCC---ATCTATTTGCAATCACTAACTTTACTGCCATCAAAAACA--GCCTAGTTAC [ 6036 ]  
Asp TGTATCC---ATCTATTTGCAATCACTAACTTTACTGCCATCAAAAACA--GCCTAGTTAC [ 5877 ]  
Ami TGTGTCA---GTCCCTTTGGCAATCACTAACTTCACTGCCATCAAAAACA--GCCTAGTTGC [ 6280 ]  
Asi TGTGTCA---GTCCCTTTGGCAATCACTAACTTCACTGCCATCAAAAACA--GCCTAGTTGC [ 6337 ]  
Tgu TGTCTGC---AGAATTTCCACAATCACTAACTTCACTGCCACCAAAAACA--GCCTGGTTGC [ 5028 ]  
Cli TGTAACC---ACTGCTCCGCAATCACTACACTCACTGCCATCAAAAACA--GCCTAGTTAC [ 6130 ]  
Gga TGTACCC---AGCGCCCCACAATCACTAAATCACTGCCATCAAAAACA--GCCTGGTTAC [ 5631 ]  
Xtr TGTGTTAACATAAGACTTTGCAATCACTAGCTAAACTACCAGCAAAAAC----- [ 6119 ]  
Lch TGTGTCC---CTGCAGTCTGCAATCACTAACCACACTACCATCAAAAACA--GCCTAGTTAC [ 6474 ]  
Dre TGTTTCA---TATGAACTATAATCACTAACCATACTGCCAACACAACA--GTGTGGTAC [ 6241 ]

Hsa TAGGCAGTGTAGTTAGCTGATTGCTAAT---AGTACCAATCACTAACCACACGGCCAGGT [ 6420 ]



Mmu TAGGCAGTGTAGTTAGCTGATTGCTAAT---AGTACCAATCACTAACCACACAGCCAGGT [ 6337 ]  
Mdo TAGGCAGTGTAGTTAGCTGATTGCTAGCAGTAGTACCAATCACTAACCACACAGCCAAGT [ 6026 ]  
Meu ----- [ 5122 ]  
Oan TAGGCAGTGTAGTTAGCTGATTGCTATT---AACACCAATCACTAGCCACACAGCCAGGT [ 5588 ]  
Aca CAGGCAGTGTAGTTAGCTGATTGACGA----GGCAACAGTCACTAACAACACGGCCAGGT [ 6347 ]  
Pbi CAGGCAGTGTAGTTAGCTGATTGACAAA---GGCAACAGTCGCTAACAACACAGCCAAGT [ 6410 ]  
Cpi CAGGCAGTGTAGTTAGCTGATTGCTAAA---GGTA-CAATCACTAACCACACAGCCAGGT [ 6763 ]  
Cmy CAGGCAGTGTAGTTAGCTGATTGCTAAA---GGTAACAATCACTAACCACACAGCCAGGT [ 6511 ]  
Psi CAGGCAGTGTAGTTAGCTGATTGCCAAA---GGTAACAATCACTAACCACACAGCCAGGT [ 6093 ]  
Asp CAGGCAGTGTAGTTAGCTGATTGCCAAA---GGTAACAATCACTAACCACACAGCCAGGT [ 5934 ]  
Ami TAGGCAGTGTAGTTAGCTGATTGCAAAA---GGCAACAATCACTAACCACACAGCCAGGT [ 6337 ]  
Asi TAGGCAGTGTAGTTAGCTGATTGCAAAA---GGCAACAATCACTAACCACACAGCCAGGT [ 6394 ]  
Tgu CAGGCAGTGTAGTTAGCTGATTGCCCAA---AGCAACAATCACTAGCCACACGGCCAGGT [ 5085 ]  
Cli TAGGCAGTGTAGTTAGCTGATTGCCAAA---AGTACCAATCACTAGCCACACAGCCAGGT [ 6187 ]  
Gga CAGGCAGTGTAGTTAGCTGATTGCCACC---AGGACCAATCACTAACCACACAGCCAGGT [ 5688 ]  
Xtr ----- [ 6119 ]  
Lch TAGGCAGTGTGCTTAGCTGATTGGTAAAC---AGCAGCAATCACTAACCACACAGCCAGGT [ 6531 ]  
Dre CAGGCAGTGCAGTTAGTTGATTACAATCCA-TAAAGTAATCACTAACCTCACTACCAGGT [ 6300 ]  
  
Hsa AAAA--TGTGATGAGCTGGCAGTGTATTGTTAGCTGGTTGAATATGTGAATGGCATCGGC [ 6478 ]  
Mmu AAAA--TGTGATGGCTTGGCAGTGTATTGTTAGCTGGTTGAGTATGTGAGCGGCACCAGC [ 6395 ]  
Mdo AAAC--TGTGATGGGATGGCAGTGTATTGTTAGCTGGTTGACTATCTGAACG-TGCCAGC [ 6083 ]  
Meu -----TGTGATGGGATGGCAGTGTATTGTTAGCTGGTTGAATATCTGAAT-GTACCAGC [ 5175 ]  
Oan AAAA--TGCGATAGTTTGGCAGTGT-TTGTAGCTGGTTGAATATTTAAATGGCACCAGC [ 5645 ]  
Aca GAAA--TGTGGTGGAAATGGCAGTGTATTGTTAGCTGGATGAGTATCTCAATGCCCCCAGC [ 6405 ]  
Pbi GAAA--TGTAGTGGAAATGGCAGTGTATTGTTAGCTGGATGGATATCCAAATGGCACCAGC [ 6468 ]  
Cpi AAAA--TGTGCTAGGAAGGCAGTGTATTGTTAGCTGGT----TGAAAATCTGACAGCAGC [ 6817 ]  
Cmy AAAA--TGTGCTAAGAAGGCAGTGTATTGTTAGCTGGT----TGAAAATCCGACACCAGC [ 6565 ]  
Psi AAAA--TGTGCTGGGAAGGCAGTGTATTGTTAGCTGGT----TGAAACATCTGACACCAGC [ 6147 ]  
Asp AAAA--TGTGCTGGGAAGGCAGTGTATTGTTAGCTGGT----TGAAACATCTGACACCAGC [ 5988 ]  
Ami AAAA--TGTGATGGGAAGGCAGTGTACTGTTAGCTGGTG---TCAGTTTTTTTCAACCAGC [ 6392 ]  
Asi AAAA--TGTGGTGGGAAGGCAGTGTACTGTTAGCTGGTT---GAAAAAACTGACACCAGC [ 6449 ]  
Tgu AAAA--TGTGATGGGATGGCAGTGTG-TGTTGGCTGCTTG---AAGTTCTGACAGCAGC [ 5138 ]  
Cli AAAA--TGGGATGGGATGGCAGTGTG-TGTTAGCTGGTTG---AAATTCT-GACATCAGC [ 6240 ]  
Gga AAAA--TGCGGTGGGGTGGCAGTGTG-TGTTAGCTGGTTG---AAACTCTTGACATCAGC [ 5742 ]  
Xtr -----TTTAGAAGGAAGGCAGTGTAAATGTTAGCTGGTTG-GAAAATAGCAGACACTGGT [ 6172 ]  
Lch AAAC----- [ 6535 ]  
Dre GAAG----- [ 6304 ]  
  
Hsa TAACATGCAACTGCTGTCTTATT--GAATCAGGTAGGCAGTGTATTGTTAGCTGGCTGC- [ 6535 ]  
Mmu TAACATGCGACTGCTCTCCTATT--GAATCAGGTAGGCAGTGTATTGTTAGCTGGCTGC- [ 6452 ]  
Mdo TAACATGCAACTGCTATCCCATTT----- [ 6106 ]  
Meu TACTATGCAACTGCTGTCTTATT--GGGTCAAGTAGGCAGTGTGCTGTAAGCTGGCTGCT [ 5233 ]  
Oan TGACAGACAGCTGCTTTCTTATT--GGGTCAAGTAGGCAGTGTGATGTTTGCTGGCTGCT [ 5703 ]  
Aca TGACATTCAGCTGCCAATCTACG----- [ 6428 ]  
Pbi TGACATTCAGCTGCCAGCCTACG--GTGACTGATAGGCAGTGTAGAATTAGCTGGCTGCT [ 6526 ]  
Cpi TAACCTACATCTGCTATCTTATT--GTGTCTGGTAGGCAGTGTACTGTTAGCTGGCTGCT [ 6875 ]  
Cmy TAACCTACACCTGCTATCTTATT--GTGTCTGGTAGGCAGTGTACTGTTAGCTGGCTGCT [ 6623 ]  
Psi TAACCTACAGCTGCTATCTTATT--GTGTCTGGTAGGCAGTGTACTGTTAGCTGGCTGCT [ 6205 ]  
Asp TAACCTACAGCTGCTATCTTATT--GTGTCTGGTAGGCAGTGTACTGTTAGCTGGCTGCT [ 6046 ]  
Ami TAACATGCAGCTGCTATCCTACT--GTGTCTGGTAGGCAGTGTACTGTTAGCTGGCTGCT [ 6450 ]  
Asi TAACATGCAGCTGCTATCCTACT--GTGTCTGGTAGGCAGTGTACTGTTAGCTGGCTGCT [ 6507 ]  
Tgu TAACATGCTGCTGCTCTCTCTTC----- [ 5161 ]  
Cli TAACATGCAGTTGCTATCCTTTT--GTGTCTGGTAGGCAGTGTACTGCTAGCTGGCTGCC [ 6298 ]  
Gga TAACACGCAGTTGCTAACCTGCT--GTGGCTGGAAGGCAGTGTGCTGTTAGC-GGCTGCT [ 5799 ]  
Xtr TAACCTACACCTGCCCCCTTCT--GCTTTGGGTAGGCAGTGTAGTTTGTAGCTGGCTGCT [ 6230 ]  
Lch -----GCATCAAGTAGGCAGTGTACTGTTAGCTGGCTGCT [ 6570 ]

```
Dre ----- [ 6304 ]

Hsa TTGGGTCAAG--TCAGCAGCCACAACCTACCCTGCCACTTGCTT--ATGTGTCAGGTAGGC [ 6591 ]
Mmu TTGGGTCAAG--TCAGCAGCCACAACCTACCCTGCCACTTGCTT--GTGTGTCAGGCAGGC [ 6508 ]
Mdo ----- [ 6106 ]
Meu TGGGTTTCAGT--TCAGCAGTCACAACCACCCTGCCACTTGCTC----- [ 5274 ]
Oan TTGAATCGAT--TCAGCAGCCACCGTTACTCTGCCACTTGCTA--ATGTGCCGGTTTGGC [ 5759 ]
Aca -----CTGTGTCGCTTTGGC [ 6443 ]
Pbi TTGT-TTAATT-CTAGCAGTCGCTACCACACTGCTATCTGCTG--GTGTGTCACTTTGGC [ 6582 ]
Cpi TTGTGTGAAT--CTAGCAGTCTCTACTACACTGTCACCTGCTG--ATGTGACAGTTTGGC [ 6931 ]
Cmy TTGTGTGAAT--CTAGCAGTCTCTACTACACTGTCACCTGCTG--ATGTGACAGTTTGGC [ 6679 ]
Psi TTGTGTGGAT--CTAGCAGTCTCTACTACACTGTCACCAGCTG--ATGTGACAGTTTGGC [ 6261 ]
Asp TTGTGTGAAT--CTAGCAGTCTCTACTACACTGTCACCAGCTG--ATGTGACAGTTTGGC [ 6102 ]
Ami TTGTGTGAAT--CTAGCAGTCGCTACTGCACTGTCAACAGCTG--ATGTTTCAGTTTGGC [ 6506 ]
Asi TTGTGTGAAT--CTAGCAGTCGCTACTGCACTGTCAACAGCTG--ATGTTTCAGTTTGGC [ 6563 ]
Tgu ----- [ 5161 ]
Cli GTATCTGGAT--GGAGCAGTCACTCCTGCACTGCCACCTGCTG--ATGTAACAGTCTGGC [ 6354 ]
Gga GTGC-TGAAT--GGAGCAGTCACTACCACACTGCCACCTGCTG--ATGTAACAGTCTGGC [ 5854 ]
Xtr TGCTATTAACT-CCAGCAGTCGCTAATACTCTGCCACCGGCAG--TTGGACCAATGAGGC [ 6287 ]
Lch GGGTTTCTGCGGATAGCAGTCGCTACTACTCTGCCACCTGTTG--ATGCTTCAGTTAGGC [ 6628 ]
Dre ----- [ 6304 ]

Hsa AGTGTA-TTGCTAGC-GGCTGTTAA-----TGATTTTAAACAGTTGCTAGTTGCACTCC [ 6642 ]
Mmu AGTGCA-TTGCTAGCTGGCTGTTAGA---ACTTTATCCCAACAGTTGCTAGCTGCACTAC [ 6564 ]
Mdo ----- [ 6106 ]
Meu ----- [ 5274 ]
Oan AGTGCT-TTGCTAGCTGGCTGTTCAA-----TAAATGATTCCAGCAGCTGGTTGCACGCC [ 5813 ]
Aca AGTGCA-CTACTAGCTGGCTGTTGAGATATATTCATTTTTACAGTGGTTAGTTGCACTCC [ 6502 ]
Pbi AGTGCA-GTACTAGCTGGCTGTTTGGATACCTTCTGTGTTACAGCAGCTGGTTGCACTCC [ 6641 ]
Cpi AGTGCC-TTGCTAGCTGGCTGTTGAGAACTTGATATATGAACAGTTGCTAGCTGCACTCC [ 6990 ]
Cmy AGTGCA-TTGCTAGCTGGCTGTTGAGAACTTGATATATGAACAGTTGCTAGCTGCACTCC [ 6738 ]
Psi AGTGCA-CTGCTAGCTGGCTGTTGAAAACCTTTGTATATGAACAGTTGCTAAGTGCACTCC [ 6320 ]
Asp AGTGCA-CTGCTAGCTGGCTGTTGAAAACCTTTGTATATGAACAGTTGCTAAGTGCACTCC [ 6161 ]
Ami AGTGCA-TTGCTAGCTGGCTGTTGTG---TACGTGTGTTAACAGTTGCTAGCTGTACTCC [ 6562 ]
Asi AGTGCA-TTGCTAGCTGGCTGTTGTG---TACGTGTGTTAACAGTTGCTAGCTGTACTCC [ 6619 ]
Tgu ----- [ 5161 ]
Cli AGTGCA--TGTTAGCTGGCTGTTGTG--TCTGATGTGTCAACAGCTGCTAGCTGTGCTCC [ 6410 ]
Gga AGTGCA--TGTTAGCTGGCTGTTGTG--TCTGATGTGTCAACAGCTGCTAGCTGTGCTCC [ 5910 ]
Xtr AGTGCACTTGCTAGCTGGCTGTTGTG--TTCTGGAAGCTTACAGCTGCTAGCTGCACTCC [ 6345 ]
Lch AGTGTA-TTGCTAGCTGGCTGTTGTGTATTTGACAGGTCAACAGCTGCTGGGTACACTCC [ 6687 ]
Dre ----- [ 6304 ]

Hsa TCTCTGTTGC----- [ 6652 ]
Mmu CCTCTGCTGC----- [ 6574 ]
Mdo -----ATGTGGTGATTGGGCAGTGATTT-GTTAGTTAGCTGTTTTTCATAAGT [ 6153 ]
Meu -----GTGTGGTGATTGGGCAGTGATTT-GTTAGTTAGCTGTTTTTCATAAAT [ 5321 ]
Oan CCACTGTCAC----- [ 5823 ]
Aca ACCTGATGC--ATGTGATGGTTTGGCAGTGACT-CTTAGTTAGCTGTTGTATATATTA [ 6559 ]
Pbi AGAGTGCTGC--GTGTGATGGTTTGGCAGTGACTTCTTAGTTAGCTGTTGTACATATTC [ 6699 ]
Cpi ACATTGTTGC--ATGTGCTGATTAGGCAGTGATTT-GTTAGTTAGCTGTTGTTCACATAC [ 7047 ]
Cmy ACATTGTTGC--ATGTGCTGATTAGGCAGTGATTT-GTTAGTTAGCTGTTGTTCACATAC [ 6795 ]
Psi ACATTGTTGC--GTGTAAGTATTAGGCAGTGATTT-GTTAGTTAGCTGTTGCTTACATAC [ 6377 ]
Asp ACATTGTTGC--GTGTAAGTATTAGGCAGTGATTT-GTTAGTTAGCTGTTGCTTACATAC [ 6218 ]
Ami ATATTGTTGC--GTGTGATGATTAGGCAGTGATTT-GTTAGTTAGCTGGCATTCACATAC [ 6619 ]
Asi ATATTGTTGC--GTGTGATGATTAGGCAGTGATTT-GTTAGTTAGCTGGCATTCACATAC [ 6676 ]
Tgu -----GTGTGGTGATTAGGCAGTGATTT-GTTAGTTAGCTGTTTCTTACACAC [ 5208 ]
Cli ACATTGTTTTC--GTGTGGTGATGAGGCAGTGATTT-GTTAGTTAGCTGTTTCTTACACAC [ 6467 ]
```

|     |                                                                |          |
|-----|----------------------------------------------------------------|----------|
| Gga | ACATTGTTTC--GTGTGGTGATTAGGCAGTGTATT-GTTAGTTAGCTGCGCTTCATACAC   | [ 5967 ] |
| Xtr | ACATTGTTTC-----                                                | [ 6355 ] |
| Lch | ACATTGCTGC--GTGCGGTGATTAGGCAGTGTAAAT-GTTAGCTGACTGTGATTTACATAT  | [ 6744 ] |
| Dre | -----                                                          | [ 6304 ] |
|     |                                                                |          |
| Hsa | -----TTCTACACAGGTTGGGATCGGTTGCAAT                              | [ 6680 ] |
| Mmu | -----TTCTACACAGGTTGGGATTTGTGCGCAAT                             | [ 6602 ] |
| Mdo | GCAGCAACTGCATACACTTCCATATTTCCA--TTCTACACAGGTTGGGATCAGTTGCAAT   | [ 6211 ] |
| Meu | ACAGCAACTGCATACACTTCCATATTTCCA-----                            | [ 5351 ] |
| Oan | -----TTCTACGCAGGTTGGGATCAGTTGCAAT                              | [ 5851 ] |
| Aca | -CAGCAACTAAATACACTTCCATATTTATTG--TTCTACACAGGTTGGGATTTGGTTGCAAT | [ 6616 ] |
| Pbi | -CAGCAACTAAATACACTTCCATATTTATTG--TTCTACACAGGTTGGGATCGGTTGCAAT  | [ 6756 ] |
| Cpi | -CAGCAACTAAATACGCTTCCACATTAGCA--TTCTACACAGGTTGGGATCAGTTGCAAT   | [ 7104 ] |
| Cmy | -CAGCAACTAAATACACTTCCACATTAGCA--TTCTACACAGGTTGGGATCAGTTGCAAT   | [ 6852 ] |
| Psi | -CAGCAACTAAATACACTTCCACATTAGCA--TTCTACACAGGTTGGGATTAGTTGCAAT   | [ 6434 ] |
| Asp | -CAGCAACTAAATACACTTCCACATTAGCA--TTCTACACAGGTTGGGATTAGTTGCAAT   | [ 6275 ] |
| Ami | -CAGCAACTAAACACACTTCCACATTAGCA--TTCTACACAGGTTGGGATCAGTTGCAAT   | [ 6676 ] |
| Asi | -CAGCAACTAAACACACTTCCACATTAGCA--TTCTACACAGGTTGGGATCAGTTGCAAT   | [ 6733 ] |
| Tgu | -CAGCAACTGACTACACTGTCAGATTAGCA--TTCTACACAGGTTGGGATCAGTTGCAAT   | [ 5265 ] |
| Cli | -CAGCAACTGACTACACTGCCACATCAACA--TTCTACACAGGTTGGGATCAGTTGCAAT   | [ 6524 ] |
| Gga | -CAGCAACTAACTACACTGCCACATTAGCA--TTCTACACAGGTTGGGATCAGTTGCAAT   | [ 6024 ] |
| Xtr | -----TTCTGTATAGGTTGGGATTTGGTTGCAAT                             | [ 6383 ] |
| Lch | -GAGCAACTACATGACTATCATATTTGCG--TTCTACGCAGGTTGGGATTAGTTGCAAT    | [ 6801 ] |
| Dre | -----TTCTGCGCAGGTTGGGATTTGGTAGCAAT                             | [ 6332 ] |
|     |                                                                |          |
| Hsa | GCTGTGTTTT--CTGTATGGTATTGCACTTGTCCCGCCTGTTGAGTTTT--TCATCCCTGG  | [ 6736 ] |
| Mmu | GCTGTGTTTTCTCTGTATGGTATTGCACTTGTCCCGCCTGTTGAGTTTT--TCATCCACAG  | [ 6660 ] |
| Mdo | GCTGTGTCT--GTCTGTAGTATTGCACTTGTCCCGCCTGTTGAGTTTT--TTCTCTGCGG   | [ 6267 ] |
| Meu | -----TTCTCTGCGG                                                | [ 5361 ] |
| Oan | GCTTTGTTTT--GTCTATGGTATTGCACTTGTCCCGCCTGTTGAGGTT--TCCTCCATGG   | [ 5907 ] |
| Aca | GCTGTCTATGTGTATGTGGTATTGCACTTGTCCCGCCTGTTGAGGTT--TTCTCCCTGG    | [ 6674 ] |
| Pbi | GCTGTGTTG-AGTCTGTGGTATTGCACTTGTCCCGCCTGT-GAGGTT--TCCTCCGTGG    | [ 6812 ] |
| Cpi | GCTGTGTGT--GCCTGTAGTATTGCACTTGTCCCGCCTGTTGAGGTT--TTCTCCATGG    | [ 7160 ] |
| Cmy | GCTGTGTGT--GTCTGTAGTATTGCACTTGTCCCGCCTGTTGAGGTT--TTCTCCATGG    | [ 6908 ] |
| Psi | GCTGTGTGT--GCCTGTAGTATTGCACTTGTCCCGCCTGTTGAGGTT--TTCTCCATGG    | [ 6490 ] |
| Asp | GCTGTGTGT--GCTTGTAGTATTGCACTTGTCCCGCCTGTTGAGGTT--TTCTCCATGG    | [ 6331 ] |
| Ami | GCTGTGTGT--GTCTGTGGTATTGCACTTGTCCCGCCTGTTGAGGTT-----           | [ 6722 ] |
| Asi | GCTGTGTGT--GTCTGTGGTATTGCACTTGTCCCGCCTGTTGAGGTT--TTCTCCATGG    | [ 6789 ] |
| Tgu | GCTGTGTGT--GTCTGTGGTATTGCACTTGTCCCGCCTGTTGAGGTT--TTCTCCATGG    | [ 5321 ] |
| Cli | GCTGTGTGT--GTCTCTGGTATTGCACTTGTCCCGCCTGTTGAGGTT--TTCTCCATGG    | [ 6580 ] |
| Gga | GCTGTGCGT--TTCTGTGGTATTGCACTTGTCCCGCCTGTTGAGGTT--TCCTCCGTGG    | [ 6080 ] |
| Xtr | GCTGTACTA-TTTATGTAGTATTGCACTTGTCCCGCCTGTTTAGGAT--TCCTCTGTGG    | [ 6440 ] |
| Lch | GCTGTATGT--TGCTGAAGTATTGCACTTGTCCCGCCTGTTGAGGAC--TTCTGTATGG    | [ 6857 ] |
| Dre | GCTGTGTGT--TTTGAAGGATTATTGCACTTGTCCCGCCTGTAAAGGAT-----         | [ 6378 ] |
|     |                                                                |          |
| Hsa | GTGGGGATTTGTTGCATTACTTGTGT---TCTATA-TA-AAGTATTGCACTTGTCCCGGC   | [ 6791 ] |
| Mmu | GTGGGGATTTGGTGGCATTACTTGTGT---TAGATA-TA-AAGTATTGCACTTGTCCCGGC  | [ 6715 ] |
| Mdo | GTGGGGATTTGTTGCATTACTTGTGATCATGTGACTA-TAAGAGTATTGCACTTGTCCCGGC | [ 6326 ] |
| Meu | GTGGGGATTTGTTGCATTACTTGTGATCTTGTGTCTA-TAAGAGTATTGCACTTGTCCCGGC | [ 5420 ] |
| Oan | GTGGGGATTTGTTGCATTACTTGTAGC--TATGTT-TA-GAGTATTGCACTTGTCCCGGC   | [ 5963 ] |
| Aca | GTTGGGATTTGTTGCATTACTTGTGGGT-TCCCTG-AA-CAGTATTGCACTTGTCCCGGC   | [ 6731 ] |
| Pbi | GTTGGGATTTGTTGTATTACTCGGAGA--TCTCTG-AA-CAGTATTGCACTTGTCCCGGC   | [ 6868 ] |
| Cpi | GTGGGGATTTGTTGCATTACTTGTAGC--TATGTG-TA-GAGTATTGCACTTGTCCCGGC   | [ 7216 ] |
| Cmy | GTGGGGATTTGTTGCATTACTTGTAGC--TATGTG-TA-GAGTATTGCACTTGTCCCGGC   | [ 6964 ] |
| Psi | GTGGGGATTTGTTGCATTACTTGTAGC--TATGTG-CA-GAGTATTGCACTTGTCCCGGC   | [ 6546 ] |
| Asp | GTGGGGATTTGTTGCATTACTTGTAGC--TATGTG-CA-GAGTATTGCACTTGTCCCGGC   | [ 6387 ] |
| Ami | -----                                                          | [ 6722 ] |

Asi GTGGGGATTTGTTGCATTACTTGTAGC--TATGTT-TA-GAGTATTGCACTTGTCCCAGG [ 6845 ]  
Tgu GTGGGGATTTGTTGCATTACTTGTAGC--TGTATG-TA-GAGTATTGCACTTGTCCCAGG [ 5377 ]  
Cli GTGGGGATTTGTTGCATTACTTGTAGC--TGTATG-TA-GAGTATTGCACTTGTCCCAGG [ 6636 ]  
Gga GTGGGGATTTGTTGCATTACTTGTAGC--TGTGTG-TA-GAGTATTGCACTTGTCCCAGG [ 6136 ]  
Xtr GTGGGGATTTGTTGCACTACT-GTA----TGTATG-AA-AAGTATTGCACTTGTCCCAGG [ 6493 ]  
Lch GTGGGGACTTGTTCATTACTTCA-----TATATT-AA-AAGTATTGCACTTGTCCCAGG [ 6910 ]  
Dre ----- [ 6378 ]

Hsa CTGTGGAAG--CAGTGTGAGAGGCGGAGACTTGGGCAATTGCTGGACGCTGCCC-TGGG [ 6848 ]  
Mmu CTGAGGAAG--CAGTGTGAGAGGCGGAGACTTGGGCAATTGCTGGACGCTGCCC-TGGG [ 6772 ]  
Mdo CTGTGGAGG--CAGTGTGAGAGGCGGAGACTTGGGCAATTGCTGAACTCTGCCC-TGGG [ 6383 ]  
Meu CTGTGGAGG----- [ 5429 ]  
Oan CTGTGGAGG----- [ 5972 ]  
Aca CTGTGGAGG----- [ 6740 ]  
Pbi CTGTGGAGG----- [ 6877 ]  
Cpi CTGTGGAGG----- [ 7225 ]  
Cmy CTGTGGAGG----- [ 6973 ]  
Psi CTGTGGAGG----- [ 6555 ]  
Asp CTGTGGAGG----- [ 6396 ]  
Ami ----- [ 6722 ]  
Asi CTGTGGAGG----- [ 6854 ]  
Tgu CTGTGGAGG----- [ 5386 ]  
Cli CTGTGGAGG----- [ 6645 ]  
Gga CTGTGGAGG----- [ 6145 ]  
Xtr CTGTGGGTG--TGGTGTGACAGGCAGAGACAGGAGCAACTGCTGGTGTGCCTTG-GTAG [ 6550 ]  
Lch CTGTGGAGG--TAGTGTGAGAGGCGGAGACTTGGGCAATTGCTGGCAATCCCAG-AGGG [ 6967 ]  
Dre -----CGGCGCTGAGAGGCGGAGACTTGGGCAGCTGCCGTCATTCCCAG-AAGG [ 6426 ]

Hsa CATTGCACTTGTCTCGGTCTGACAGTGCCG--GCGGGCGGGAGGGACGGGACGCGGTGCA [ 6906 ]  
Mmu CATTGCACTTGTCTCGGTCTGACAGTGCCG--GTGGGCGGGAGGGACGGGACGCTGGTGA [ 6830 ]  
Mdo CATTGCACTTGTCTCGGTCTGACAGTGCTG--GCGGGCGGGAGGGACGGGACGCTGGTGA [ 6441 ]  
Meu ----- [ 5429 ]  
Oan ----- [ 5972 ]  
Aca ----- [ 6740 ]  
Pbi -----GTTGGGGCAGGGTTGGGGCTGAGTGCA [ 6905 ]  
Cpi -----GGCAGCAGGAGGGACGGGATGCTGTGCA [ 7253 ]  
Cmy -----GGCAGCAGGAGGGACGGGATGCTGTGCA [ 7001 ]  
Psi -----GGTAGCAGGAGGGACGGGATGTTGTGCA [ 6583 ]  
Asp -----AGGGACGGGATGTTGTGCA [ 6415 ]  
Ami -----GGCGGGCGGGAGGGCCGGGATGCGGTGCA [ 6750 ]  
Asi ----- [ 6854 ]  
Tgu ----- [ 5386 ]  
Cli -----GGCGGGCGGGAGGGCCGGGATGCGGTGCA [ 6673 ]  
Gga ----- [ 6145 ]  
Xtr CATTGCACTTGTCTCGGTCTGACAGTGCTG-----AGAAGGATCGGGATGTTGTGCA [ 6602 ]  
Lch CATTGCACTTGTCTCGGTCTGACAGTGCTG--CTGACCTGAAGGAACGGGATGTGGTGA [ 7025 ]  
Dre CATTGCACTTGTCTCGGTCTGACAGTGCCG--CGGGCAGGGAGGTGTGGGATGTTGTGCA [ 6484 ]

Hsa GTGTTGTTTTTTTCCCCCGCCAATATTGCACTCGTCCCAGGCTCCGGCCCCCCCC--CTGCT [ 6964 ]  
Mmu GTGTTGTTCTTTTCCCCCGCCAATATTGCACTCGTCCCAGGCTCCGGCCCCCTC--CTGCT [ 6888 ]  
Mdo GTGTTGTTCTTTTCCCC--GCCAATATTGCACTCGTCCCAGGCTCCGGCCCCCCCC--CTGCT [ 6498 ]  
Meu -----CTGCT [ 5434 ]  
Oan -----CTGCT [ 5977 ]  
Aca ----- [ 6740 ]  
Pbi ATGTTGTGATTTTTTCCCACGAATATTGCACTCGTCCCTGGCCCTCCCCTGTTCT--CTGCT [ 6963 ]  
Cpi GTGTTGTTCTATACCAACCAATATTGCACTCGTCCCAGGCTCCCTGCCTCCCT--CTGCT [ 7311 ]  
Cmy GTGTTGTTCTATACCAACCAATATTGCACTCGTCCCAGGCTCCCTGCCTCCCT--CTGCT [ 7059 ]

Psi GTGTTGTTCTATCCCCTGCCAATATTGCACTCGTCCC GGCTCCTGCCTCCTT--CTGCT [6641]  
Asp GTGTTGTTCTATCCCCTGCCAATATTGCACTCGTCCC GGCTCCTGCCTCCTT--CTGCT [6473]  
Ami GTGTTGTGC-GTCTCCTACCAATATTGCACT-----CTGCT [6785]  
Asi -----CTGCT [6859]  
Tgu ----- [5386]  
Cli GTGTTGTGCTCTCGCCCACCAATATTGCACTCGTCCC GGCTCCC GCCCGCCG--CCGCC [6731]  
Gga -----CCGCC [6150]  
Xtr CTGTTGTCTCTTCTCCTGCCAATATTGCACTCGTCCC GGCTCCTGCGTCTCT--CTGTC [6660]  
Lch TTGTTGTGCTATCTCCTGCCAATATTGCACTCGTCCC GGCTCCTGG-TCTCC--CTTCT [7082]  
Dre GTGTTGTTCAATCTCCC GCCAATATTGCACTCGTCCC GGCTCCTGACCACG--CTTCT [6542]

Hsa TGGCCGATTTTGGCACTAGCACATTTTGTCTGTGTCT--CTCCGCTCTGAGCAATCATG [7022]  
Mmu TGGCCGATTTTGGCACTAGCACATTTTGTCTGTGTCT--CTCCGCTGTGAGCAATCATG [6946]  
Mdo TGGCCGTTTGGCACTAGCACATTTTGTCTGTGTCT--CTCTGCTCTGAGCAATCATG [6556]  
Meu TGGCCGTTTGGCACTAGCACATTTTGTCTGTGTCT--GTCTGCTCTGAGCAATCATG [5492]  
Oan TGGCCTCTTTTGGCACTAGCACATTTTGTCTTTTGTCT--CTCTGCTCTGAGCAATCATG [6035]  
Aca ----- [6740]  
Pbi TGGCCTTTTGGCACTAGCACATTTTGTCTGTCTCT--ATAAACATTGAGCAATTATG [7021]  
Cpi TCGCCCGTTTGGCACTAGCACATTTTGTCTTTTGTAT--AACTACTTTGAGCAATTATG [7369]  
Cmy TCGCCAGTTTGGCACTAGCACATTTTGTCTTTTGTGTCTATATACTTTGAGCAATTATG [7119]  
Psi TTGCCCGTTTGGCACTAGCACATTTTGTCTTTTGTAT--ATCTACTTTGAGCAATTATG [6699]  
Asp TTGCCCGTTTGGCACTAGCACATTTTGTCTTTTGTAT--ATATACTTTGAGCAATTATG [6531]  
Ami TGGCCATTTTGGCACTAGCACATTTTGTCTTTTGTAC--GTATACTTTGAGCAATTATG [6843]  
Asi TGGCCATTTTGGCACTAGCACATTTTGTCTTTTGTAC--GTATACTTTGAGCAATTATG [6917]  
Tgu ----- [5386]  
Cli CGGCCCGTTTGGCACTAGCACATTTTGTCTTTGATTT--GTAGCTTTTGGCAATTATG [6789]  
Gga CGGCCCGCTTTGGCACTAGCACATTTTGTCTTTGCTTT--ATGTGTTTGGCAATTATG [6208]  
Xtr TGGCCTGCTTTGGCACTAGCACATTTTGTCTTTTGTAC--ATATACTTTGAGCAATTATG [6718]  
Lch TTGCCCGTTTGGCACTAGCACATTTTGTCTTCTGTCT--ATACATATTGAGCAATTATG [7140]  
Dre TTGCCTGTTTGGCACTAGCACATTTTGTCTTTTAT--ATATACCTTGGCAATTATG [6600]

Hsa TGCAGTGCCAATATGGGAAAAGCAGG--CTCCCCCGTTTGGCAATGGTAGA ACTCAC [7080]  
Mmu TGTAGTGCCAATATGGGAAAAGCGGG--CCACCACCATTTTGGCAATGGTAGA ACTCAC [7004]  
Mdo TGTAGTGCCAATATGGGAAAAGCAAG--CTCCTGCTGTGTTTGGCAATGGTAGA ACTCAC [6614]  
Meu TGCAGTGCCAATATGGGAGAAGC-----CTCCTGCTGTGTTTGGCAATGGTAGA ACTCAC [5547]  
Oan TGTAGTGCCAATATGGGAAAAGCTGG--CTCCTGCTGTGTTTGGCAATGGTAGA ACTCAC [6093]  
Aca -----CTCCGGCTGTTTGGCAATGGTAGA ACTCAC [6772]  
Pbi TGTAGTGCCAATATGGGAGAAGTCAG--CTCTTGCTGTCTTTGGCAATGGTAGA ACTCAC [7079]  
Cpi TGTAGTGCCAATCTGGGAGAAGACGG--CTCTCGCTGTCTTTGGCAATGGTAGA ACTCAC [7427]  
Cmy TGTAGTGCCAATATGGGAGGAGACGG--CTCTGGCTGTCTTTGGCAATGGTAGA ACTCAC [7177]  
Psi TGTAGTGCCAATATGGGAGAAGATGG--CTCCCCTGTCTTTGGCAATGGTAGA ACTCAC [6757]  
Asp TGTAGTGCCAATATGGGAGAAGATGG--CTCCCCTGTCTTTGGCAATGGTAGA ACTCAC [6589]  
Ami TGTAGTGCCAATATGGGAGGAGATGG--CTCTCGCTGTCTTTGGCAATGGTAGA ACTCAC [6901]  
Asi TGTAGTGCCAATATGGGAGGAGATGG--CTCTCGCTGTCTTTGGCAATGGTAGA ACTCAC [6975]  
Tgu ----- [5386]  
Cli TGTAGTGCCAATATGGGAGAAGGCGG--CCGGGGCTGCTTTTGGCAATGGTAGA ACTCAC [6847]  
Gga TGTAGTGCCAATATGGGAGAAGGCGG--TCCTGGCTGCTTTTGGCAATGGTAGA ACTCAC [6266]  
Xtr TGTAGTGCCAATATAGGACTATACAG--CTCTGGCAGTGTTTGGCAATGGTAGA ACTCAC [6776]  
Lch TGTAGTGCCAATATGGGAAAAGTTGG--CTCTTGTGGTGTTTGGCAATGGTAGA ACTCAC [7198]  
Dre TGTAGTGCCAATATGGGACAAGACAG--CTCTGATGGTATTTGGCAATGGTAGA ACTCAC [6658]

Hsa ACTGGTGAGGTAACAGGATCCGGTGGTTCTAGACTTGCCA ACTATGGGGC-GAGG--ACT [7137]  
Mmu ACCGGTAAGGTAATGGGACCCGGTGGTTCTAGACTTGCCA ACTATGGTGT-AAGT--ACT [7061]  
Mdo ACTGGTGAGATAAATGGAATCCGGTGGTTCTAGACTTGCCA ACTACGGCTT-GAGA--ACT [6671]  
Meu ACTGGTGAGATAACAGAATCCGGTGGTTCTAGACTTGCCA ACTACGGCTT-GAGA--ACT [5604]  
Oan ACTGGTGAGGTAATGGGATCCGGTGGTTCTAGACTTGCCA ACTATGGCCC-GAGG--ACT [6150]  
Aca ACTGGTGAGGTATCAGGATCCGGTGGTTCTAGACTTGCCA ACTACGGCCC-GAGG----- [6826]

Pbi ACTGGTGAGATATCTGGATCCGGTGGTTCTAGACTTGCCAACCTACCGCCT-GGGG--CGT [ 7136 ]  
Cpi ACTGGTGAGGTATCAGGATCCGGTGGTTCTAGACTTGCCAACCTACCGCCC-GAGG--ACT [ 7484 ]  
Cmy ACTGGTGAGGTATCAGGATCCGGTGGTTCTAGACTTGCCAACCTACCGCCC-GAGG--ACT [ 7234 ]  
Psi ACTGGTGAGGTATCAGGATCCGGTGGTTCTAGACTTGCCAACCTACCGCCC-GAGG--ACT [ 6814 ]  
Asp ACTGGTGAGGTATCAGGATCCGGTGGTTCTAGACTTGCCAACCTACCGCCC-GAGG----- [ 6643 ]  
Ami ACTGGTGAGGTATCAGGATCCGGTGGTTCTAGACTTGCCAACCTACCGCCC-GAGG--ACT [ 6958 ]  
Asi ACTGGTGAGGTATCAGGATCCGGTGGTTCTAGACTTGCCAACCTACCGCCC-GAGG--ACT [ 7032 ]  
Tgu ----- [ 5386 ]  
Cli ACTGGTGCGGTAGCAGGATCCGGTGGTTCTAGACTTGCCAACCTACAGCCCCGGGG--ACT [ 6905 ]  
Gga ACTGGTGCGCTCGCAGGATCCGGTGGTTCTAGACTTGCCAACCTACAGCCCCGGGA--ACT [ 6324 ]  
Xtr ACTGGTGAGCTATGAAGATCCGGTGGTTCTAGACTTGCCAACCTATGGCCT-GGGA--CCT [ 6833 ]  
Lch ACTGGTGAGGTAACCTGGATCCGGTGGTTCTAGACTTGCCAACCTACTGCCT-GAAA--ACT [ 7255 ]  
Dre ACTGGTGAGGTAGTCAGATCCGGTGGTTCTAGACTTGCCAACCTACTACCT-GAGA--ACT [ 6715 ]  
  
Hsa CCTGTTCTGTGTATGGCACTGGTAGAATTCCTGTGAACAGTCTCAGTCAGTGAATTACC [ 7197 ]  
Mmu CCTGTCTGTGTATGGCACTGGTAGAATTCCTGTGAACAGTCTCAGTCAGTGAATTACC [ 7121 ]  
Mdo CCTGTTCTGTGTATGGCACTGGTAGAATTCCTGTGAAAAACACACTATCAGTGAATTACC [ 6731 ]  
Meu CCTGTTCTGTGTATGGCACTGGTAGAATTCCTGTGAAAAACACACTATCAGTGAATTACC [ 5664 ]  
Oan CCTGTTCTGTGTATGGCACTGGTAGAATTCCTGTGAAAAACACACTATCAGTGAATTACC [ 6210 ]  
Aca ----- [ 6826 ]  
Pbi CCTGTTCTGTGTATGGCACTGGTAGAATTCCTGTGAAAAACACTCGATCAGTGAATTACC [ 7196 ]  
Cpi CCTGTTCTGTGTATGGCACTGGTAGAATTCCTGTGAAAAACACTATCAGTGAATTACC [ 7544 ]  
Cmy CCTGTTCTGTGTATGGCACTGGTAGAATTCCTGTGAAAAACACTATCAGTGAATTACC [ 7294 ]  
Psi CCTGTTCTGTGTATGGCACTGGTAGAATTCCTGTGAAAAACACTATCAGTGAATTACC [ 6874 ]  
Asp ----- [ 6643 ]  
Ami CCTGTTCTGTGTATGGCACTGGTAGAATTCCTGTGAAAAACAGCTATCAGTGAATTACC [ 7018 ]  
Asi CCTGTTCTGTGTATGGCACTGGTAGAATTCCTGTGAAAAACAGCTATCAGTGAATTACC [ 7092 ]  
Tgu ----- [ 5386 ]  
Cli CCTGTTCTGTGTATGGCACTGGTAGAATTCCTGTGCAACCCCGCGGTTCAGTGAATTACC [ 6965 ]  
Gga CCTGTTCTGTGTATGGCACTGGTAGAATTCCTGTGCAACCCCGCGGTTCAGTGAATTACC [ 6384 ]  
Xtr CCTGTTCTGTGTATGGCACTGGTAGAATTCCTGTGAAAAACAAAAATCAGTGAATTACC [ 6893 ]  
Lch CCTGTTCTGTGTATGGCACTGGTAGAATTCCTGTGAAAAACATACTATCAGTGAATTACC [ 7315 ]  
Dre CCTGTTCTGTGTATGGCACTGGTAGAATTCCTGTGAAAGCACACTATCAGTGAATTACC [ 6775 ]  
  
Hsa GAAGGGCCATAAACAGAGCAGAGAC--TGCCCTGGCTCAGTTATCACAGTGCTGATGCTG [ 7255 ]  
Mmu GAAGGGCCATAAACAGAGCAGAGAC--TGCCCTGGCTCAGTTATCACAGTGCTGATGCTG [ 7179 ]  
Mdo AAAGGGCCATAAACAGAGCAGAGAA--TGCCCTGGCTCAGTTATCACAGTGCTGATGCTG [ 6789 ]  
Meu AAAGGGCCATAAACAGAGCAGAGAA----- [ 5689 ]  
Oan AAAGGGCCATAAACAGAGCAGAGAA--TGCCCTGGCTCAGTTATCACAGTGCTGATGCTG [ 6268 ]  
Aca -----TGCCCTGGCTCAGTTATCACTGTGCTGATGCTG [ 6859 ]  
Pbi AACGGGCCATAAACCGGAGCAGAGAA--TGCCCTGGCTCAGTTATCACTGTGCTGATGCTG [ 7254 ]  
Cpi ATAGGGCCATAAACAGAGCAGAGAA--TGCCCTGGCTCAGTTATCACAGTGCTGATGCTG [ 7602 ]  
Cmy ATAGGGCCATAAACAGAGCAGAGAA--TGCCCTGGCTCAGTTATCACAGTGCTGATGCTG [ 7352 ]  
Psi ATAGGGCCATAAACAGAGCAGAGAA--TGCCCTGGCTCAGTTATCACAGTGCTGATGCTG [ 6932 ]  
Asp -----TGCCCTGGCTCAGTTATCACAGTGCTGATGCTG [ 6676 ]  
Ami ATAGGGCCATAAACAGAGCAGAGAA--TGCCCTGGCTCAGTTATCACAGTGCTGATGCTG [ 7076 ]  
Asi ATAGGGCCATAAACAGAGCAGAGAA--TGCCCTGGCTCAGTTATCACAGTGCTGATGCTG [ 7150 ]  
Tgu -----TGCCCTGGCTCAGTTATCACAGTGCTGATGCTG [ 5419 ]  
Cli ATAGGGCCATAAACAGAGCAGAGAA--TGCCCTGGCTCAGTTATCACAGTGCTGATGCTG [ 7023 ]  
Gga ATAGGGCCATAAACAGAGCAGAGAA--TGCCCTGGCTCAGTTATCACAGTGCTGATGCTG [ 6442 ]  
Xtr ATAGGGCCATAAACAGAGCAGAGAA--TGCCCTGGCTCAGTTATCACAGTGCTGATGCTG [ 6951 ]  
Lch ATAGGGCCATAAACAGAGCAGAGAA--TGCCCTGGCTCAGTTATCACAGTGCTGATGCTG [ 7373 ]  
Dre AAAGGGCCATAAACAGAGCAGAGAA--TGCCCTGGTTTCAGTTATCACAGTGCTGATGCTG [ 6833 ]  
  
Hsa TCTATTCTAAAGGTACAGTACTGTGATAAAGGATGGC--ACTGTCCTTTTTTCGGTT [ 7313 ]  
Mmu TCCATTCTAAAGGTACAGTACTGTGATAAAGGATGGC--ACTGCCCTTTTTTCGGTT [ 7237 ]  
Mdo TCCGTTCTCAAGGTACAGTACTGTGATAAAGGATGGC--ACTGTCCTTTTTTCGGTT [ 6847 ]

Meu -----ACTGTCCTTTTTTCGGTT [ 5706 ]  
Oan TCCATTCTAAAGGTACAGTACTGTGATAACTGAAGGATGGC--ACTGTCCTTTTTTCGGTT [ 6326 ]  
Aca TCTATACTAAAGGTACAGTACTGTGATAACTGAAGGATGGC--ACTGTCCTTTTTTCGGTT [ 6917 ]  
Pbi TCTATACTAAAGGTACAGTACTGTGATAACTGAAGGATGGT--ACTGTCCTTTTTTCGGTT [ 7312 ]  
Cpi TCTATTCTAAAGGTACAGTACTGTGATAACTGAAGGATGGC--ACTGTCCTTTTTTCGGTT [ 7660 ]  
Cmy TCTATTCTAAAGGTACAGTACTGTGATAACTGAAGGATGGC--ACTGTCCTTTTTTCGGTT [ 7410 ]  
Psi TCTATTCTAAAGGTACAGTACTGTGATAACTGAAGGATGGC--ACTGTCCTTTTTTCGGTT [ 6990 ]  
Asp TCTATTCTAAAGGTACAGTACTGTGATAACTGAAGGATGGC--ACTGTCCTTTTTTCGGTT [ 6734 ]  
Ami TCTATTCTAAAGGTACAGTACTGTGATAACTGAAGGATGGC--ACTGTCCTTTTTTCGGTT [ 7134 ]  
Asi TCTATTCTAAAGGTACAGTACTGTGATAACTGAAGGATGGC--ACTGTCCTTTTTTCGGTT [ 7208 ]  
Tgu TCTCTTGTAAGGTACAGTACTGTGATAACTGAAGGATGGC--ACTGTCCTTTTTTCGGTT [ 5477 ]  
Cli TCTCTTGTAAGGTACAGTACTGTGATAACTGAAGGATGGC--ACTGTCCTTTTTTCGGTT [ 7081 ]  
Gga TCTCTTGTAAGGTACAGTACTGTGATAACTGAAGGATGGC--ACTATCCTTTTTTCGGTT [ 6500 ]  
Xtr TCTACTCTAAAGGTACAGTACTGTGATAACTGAAGGATGGT--ACTGTCCTTTTTTCGGTT [ 7009 ]  
Lch TCCATTCTAAAGGTACAGTACTGTGATAACTGAATGATGGC--ACTGTCCTTTTTTCGGTT [ 7431 ]  
Dre TCCATCTTAAAGGTACAGTACTGTGATAACTGAAGGATGGC--ATTGTCCATTTTCAGTT [ 6891 ]

Hsa ATCATGGTACCGATGCTGTATATCTGAAAGGTACAGTACTGTGATAACTGAAGAATGGTG [ 7373 ]  
Mmu ATCATGGTACCGATGCTGTAGCTCTGAAAGGTACAGTACTGTGATAGCTGAAGAATGGCG [ 7297 ]  
Mdo ATCATGGTACCGATGCTGTATATGTGAAAGGTACAGTACTGTGATAACTGAAGAATGGTG [ 6907 ]  
Meu ATCATGGTACCGATGCTGTATATGTGAAAGGTACAGTACTGTGATAACTGAAGAATGGTG [ 5766 ]  
Oan ATCACGGTACCGATGCTGTATATGTGAAAGGTACAGTACTGTGATAACTGAAGAATGGTG [ 6386 ]  
Aca ATCATGGTACCGGTGCTGTATATCTGAAAGGTACAGTACTGTGATAACTGAAGAATGATG [ 6977 ]  
Pbi ATCATGGTACCGGTGCTGTATGTACGAAAGGTACAGTACTGTGATAACTGAAGAATGATA [ 7372 ]  
Cpi ATCATGGTACCGGTGCTGTATACGTGAAAGGTACAGTACTGTGATAACTGAAGAATGATG [ 7720 ]  
Cmy ATCATGGTACCGGTGCTGTATATGTGAAAGGTACAGTACTGTGATAACTGAAGAATGATG [ 7470 ]  
Psi ATCATGGTACCGGTGCTGTATACGTGAAAGGTACAGTACTGTGATAACTGAAGAATGATG [ 7050 ]  
Asp ATCATGGTACCGGTGCTGTATACGTGAAAGGTACAGTACTGTGATAACTGAAGAATGATG [ 6794 ]  
Ami ATCATGGTACCGGTGCTGTATACGTGAAAGGTACAGTACTGTGATAACTGAAGAATGATG [ 7194 ]  
Asi ATCATGGTACCGGTGCTGTATACGTGAAAGGTACAGTACTGTGATAACTGAAGAATGATG [ 7268 ]  
Tgu ATCATGGTACCGGTGCTGTATACGTGAAAGGTACAGTACTGTGATAACTGAAGAATGGTG [ 5537 ]  
Cli ATCATGGTACCGGTGCTGTATACGTGAAAGGTACAGTACTGTGATAACTGAAGAATGGTG [ 7141 ]  
Gga ATCATGGTACCGGTGCTGTATACGTGAAAGGTACAGTACTGTGATAACTGAAGAATGGTG [ 6560 ]  
Xtr ATCATGGTACCGGTGCTGTGTATATGAAAGGTACAGTACTGTGATAACTGAAGAATGGTG [ 7069 ]  
Lch ATCATGGTACCGATGCCGTGTTCCCTCAAAGGTACAGTACTGTGATAACTGAAGAATGGCA [ 7491 ]  
Dre ATCATGGTACCGGTGCTGTGTGCCTGTCAAGTACAGTACTATGATAACTGAAGATTGACG [ 6951 ]

Hsa GT--TACTGCCCTTCGGCTTCTTTACAGTGCTGCCTTGTTGCAT-ATGGATCAAGCAGCAT [ 7430 ]  
Mmu GT--TACTGCCCTTCGGCTTCTTTACAGTGCTGCCTTGTTGCAT-ATGGATCAAGCAGCAT [ 7354 ]  
Mdo GT--TATTGTCTTCGGCTTCTTTACAGTGCTGCCTTGTTGCAT-ATGGATCAAGCAGCAT [ 6964 ]  
Meu GT--TATTGTCTTCGGCTTCTTTACAGTGCTGCCTTGTTGCAT-ATGGATCAAGCAGCAT [ 5823 ]  
Oan GT--CCTTGCCCTTCGGCTTCTTTACAGTGCTGCCTTGTTGCAT-ATGGATCAAGCAGCAT [ 6443 ]  
Aca GT--CGCTGCCTTCAGCTTCTTTACAGTGCTGCCTTGTTGCTT-ATGGATCAAGCAGCAT [ 7034 ]  
Pbi GT--TGCTGTCTTCGGCTTCTTTACAGTGCTGCCTTGTTGCAT-ATGGATCAAGCAGCAT [ 7429 ]  
Cpi GT--CATTGTCTTCGGCTTCTTTACAGTGCTGCCTTGTTGCAT-ATGGATCAAGCAGCAT [ 7777 ]  
Cmy GT--CATTGTCTTCGGCTTCTTTACAGTGCTGCCTTGTTGCAT-ATGGATCAAGCAGCAT [ 7527 ]  
Psi GT--CACTGTCTTCGGCTTCTTTACAGTGCTGCCTTGTTGCAT-ATGGATCAAGCAGCAT [ 7107 ]  
Asp GT--CACTGTCTTCGGCTTCTTTACAGTGCTGCCTTGTTGCAT-ATGGATCAAGCAGCAT [ 6851 ]  
Ami GT--CATTGTCTTTGGCTTCTTTACAGTGCTGCCTTGTTGCAT-ATGGATCAAGCAGCAT [ 7251 ]  
Asi GT--CATTGTCTTTGGCTTCTTTACAGTGCTGCCTTGTTGCAT-ATGGATCAAGCAGCAT [ 7325 ]  
Tgu GT--TACTGCCTTCGGCTTCTTTACAGTGCTGCCTTGTTGCAT-ATGGATCAAGCAGCAT [ 5594 ]  
Cli GT--TACTGTCTTCGGCTTCTTTACAGTGCTGCCTTGTTGCAT-ATGGATCAAGCAGCAT [ 7198 ]  
Gga GT--TGCTGCCTTCGGCTTCTTTACAGTGCTGCCTTGTTGCAT-ATGGATCAAGCAGCAT [ 6617 ]  
Xtr GT--CATTTCCTTTGGCTTCTTTACAGTGCTGCCTTGTTGCAT-ATGGATCAAGCAGCAT [ 7126 ]  
Lch GT--CCTTGCTTTTGGCTTCTCTACAGTGCTGCCTTGTTGCATTAAGGTTCAAGCAGCAT [ 7549 ]  
Dre GT----- [ 6953 ]

Hsa TGTACAGGGCTATGAAGGCATTG--TGTGCTTTTCAGCTTCTTTTACAGTGCTGCCTTGTAG [ 7488 ]  
Mmu TGTACAGGGCTATGAAGGCATTG--CGTGCTTTTCAGCTTCTTTTACAGTGCTGCCTTGTAG [ 7412 ]  
Mdo TGTACAGGGCTATGAAGACATTG--GGTGCTTTTCAGCTTCTTTTACAGTGCTGCCTTGTAG [ 7022 ]  
Meu TGTACAGGGCTATGAAGGCACTG--AGTGCTTTTCAGCTTCTTTTACAGTGCTGCCTTGTAG [ 5881 ]  
Oan TGTACAGGGCTATGAGGGCATTG--GGTGCTTTTCAGCTTCTTTTACAGTGCTGCCTTGTAG [ 6501 ]  
Aca TGTACAGGGCTATGAAGGCATTG--GGTGCTTTTCAGCTTCTTTTACAGTGCTGCCTTGTAG [ 7092 ]  
Pbi TGTACAGGGCTATGAGGACACCG--GGCGCTTTCAGCTTCTTTTACAGTGCTGCCTTGTAG [ 7487 ]  
Cpi TGTACAGGGCTATGAAGGCATTA--TGTGCTTTTCAGCTTCTTTTACAGTGCTGCCTTGTAG [ 7835 ]  
Cmy TGTACAGGGCTATGAAGGCATTA--TGTGCTTTTCAGCTTCTTTTACAGTGCTGCCTTGTAG [ 7585 ]  
Psi TGTACAGGGCTATGAAGGCATTA--TTTGCTTTTCAGCTTCTTTTACAGTGCTGCCTTGTAG [ 7165 ]  
Asp TGTACAGGGCTATGAAGGCATTA--TTTGCTTTTCAGCTTCTTTTACAGTGCTGCCTTGTAG [ 6909 ]  
Ami TGTACAGGGCTATGAAGACAATG----- [ 7274 ]  
Asi TGTACAGGGCTATGAAGACAATG--TGTGCTTTTCAGCTTCTTTTACAGTGCTGCCTTGTAG [ 7383 ]  
Tgu TGTACAGGGCTATGAAGGCATTG--TGTGCTTTTCAGCTTCTTTTACAGTGCTGCCTTGTAG [ 5652 ]  
Cli TGTACAGGGCTATGAAGGCATTG--TGTGCTTTTCAGCTTCTTTTACAGTGCTGCCTTGTAG [ 7256 ]  
Gga TGTACAGGGCTATGAAGGCACTG--TGTGCTTTTCAGCTTCTTTTACAGTGCTGCCTTGTAG [ 6675 ]  
Xtr TGTACAGGGCTATGAAGGATCTG--TGTGCTTTTCAGCTTCTTTTACAGTGCTGCCTTGTAG [ 7184 ]  
Lch TGTACAGGGCTATGAAGGCACTG--TGTGCTTTTCAGCTTCTTTTACAGTGCTGCCTTGTAG [ 7607 ]  
Dre -----TGGTCTGTGACGCTCTTTTACGGTGCTGCCTTGTAG [ 6988 ]

Hsa CATTTCAGGTCAAGCAGCATTGTACAGGGCTATGAAAGAACCA--CTCTCTGCTTTTCAGCT [ 7546 ]  
Mmu CATTTCAGGTCAAGCAGCATTGTACAGGGCTATGAAAGAACCA--CTCTGTGCTTTTCAGCT [ 7470 ]  
Mdo CATTGATGTCAAGCAGCATTGTACAGGGCTATGAAAGAACCA--CTTTCTGCTTTTCGGCT [ 7080 ]  
Meu CATTGATGTCAAGCAGCATTGTACAGGGCTATGAAAGAGCCG----- [ 5923 ]  
Oan CATTTCATGTCAAGCAGCATTGTACAGGGCTATGAAAGAACCA--CTCTTTGCTTTTCAGCT [ 6559 ]  
Aca CAACCATGTCAAGCAGCATTGTACAGGGCTATGAAAGAACCA--CTCTTTGCTTTTCAGCT [ 7150 ]  
Pbi CAACCATGTCAAGCAGCATTGTACAGGGCTATGAAAGAACCC--CTCTTTGCTTTTCAGCT [ 7545 ]  
Cpi CATTTCATGTCAAGCAGCATTGTACAGGGCTATGAAAGAAGCTG--CTTTTTCAGCTTTTCAGCT [ 7893 ]  
Cmy CATTTCATGTCAAGCAGCATTGTACAGGGCTATGAAAGAAGCTG--CTTTTTCAGCTTTTCAGCT [ 7643 ]  
Psi CATTTCAGATCAAGCAGCATTGTACAGGGCTATGAAAGAATTG--CTTTTTCAGCTTTTCAGCT [ 7223 ]  
Asp CATTTCAGATCAAGCAGCATTGTACAGGGCTATGAAAGAATTG--CTTTTTCAGCTTTTCAGCT [ 6967 ]  
Ami -----CTCTTTGCTTTTCAGCT [ 7290 ]  
Asi CATTTCATGTCAAGCAGCATTGTACAGGGCTATGAAAGAACAG--CTCTTTGCTTTTCAGCT [ 7441 ]  
Tgu CATTTCATGTCAAGCAGCATTGTACAGGGCTATGAAAGAGCAG--CTCTTTGCTTTTCAGCT [ 5710 ]  
Cli CGTTCATGTCAAGCAGCATTGTACAGGGCTATGAAAGAGCAG--CTCTTTGCTTTTCAGCT [ 7314 ]  
Gga CGTTCATGTCAAGCAGCATTGTACAGGGCTATGAAAGAACAG--CTCTTTGCTTTTCAGCT [ 6733 ]  
Xtr CATCTATGTCAAGCAGCATTGTACAGGGCTATGAAAGAGCAG--CTTACTGCTTTTCAGCT [ 7242 ]  
Lch CATCAATGTCAAGCAGCATTGTACAGGGCTATGAAAGAGCTG--CTCTGTGCTTTTCAGCT [ 7665 ]  
Dre AATCTGGATCAAGCAGCATTGTACAGGGCTATGAGAGACCCG--TGTGTTGCTCTGAGCT [ 7046 ]

Hsa TCTTTTACAGTGTTGCCTTGTGGCATGGAGTTCAAGCAGCATTGTACAGGGCTATCAAAGC [ 7606 ]  
Mmu TCTTTTACAGTGTTGCCTTGTGGCATGGAGTTCAAGCAGCATTGTACAGGGCTATCAAAGC [ 7530 ]  
Mdo TCTCTACAGTGTTGCCTTGTGGCGTGGAGTTCAAGCAGCATTGTACAGGGCTATCAAAGC [ 7140 ]  
Meu ----- [ 5923 ]  
Oan TCTTTTACAGTGTTGCCTTGTGGCATGGAGTTCAAGCAGCATTGTACAGGGCTATCAAAGC [ 6619 ]  
Aca TCTTTTACAGTGTTGCCTTGTGGCATGGAGTTCAAGCAGCATTGTACAGGGCTATCAAAGC [ 7210 ]  
Pbi TCTTTTACAGTGTTGCCTTGTGGCATGGAGTTCAAGCAGCATTGTACAGGGCTATCAAAGC [ 7605 ]  
Cpi TCTTTTACAGTGTTGCCTTGTGGCATGGAGTTCAAGCAGCATTGTACAGGGCTATCAAAGC [ 7953 ]  
Cmy TCTTTTACAGTGTTGCCTTGTGGCACGGAGTTCAAGCAGCATTGTACAGGGCTATCAAAGC [ 7703 ]  
Psi TCTTTTACAGTGTTGCCTTGTGGCATGGAGTTCAAGCAGCATTGTACAGGGCTATCAAAGC [ 7283 ]  
Asp TCTTTTACAGTGTTGCCTTGTGGCATGGAGTTCAAGCAGCATTGTACAGGGCTATCAAAGC [ 7027 ]  
Ami TCTTTTACAGTGCTGCCTTGTGTCATTTATGTCAAGCAGCATTGTACAGGGCTATCAAAGC [ 7350 ]  
Asi TCTTTTACAGTGTTGCCTTGTGGCATGGAGTTCAAGCAGCATTGTACAGGGCTATCAAAGC [ 7501 ]  
Tgu TCTTTTACAGTGTTGCCTTGTGGCATGGAGTTCAAGCAGCATTGTACAGGGCTATCAAAGC [ 5770 ]  
Cli TCTTTTACAGTGTTGCCTTGTGGCATGGAGTTCAAGCAGCATTGTACAGGGCTATCAAAGC [ 7374 ]  
Gga TCTTTTACAGTGTTGCCTTGTGGCATGGAGTTCAAGCAGCATTGTACAGGGCTATCAAAGC [ 6793 ]  
Xtr TCTTTTACAGTGTTGCCTTGTGGCATGGAGTTCAAGCAGCATTGTACAGGGCTATCAAAGC [ 7302 ]



Lch TCTTTACAGTGTTCCTTGTGGCATGAGGATCAAGCAGCATTGTACAGGGCTATCAAAGC [7725]  
Dre TCTTTACAGTGTTCCTTGTGGCATGGAGATCAAGCAGCATTGTACAGGGCTATCACAGC [7106]

Hsa ACA--CCTTAGCAGAGCTGTGGAGTGTGACAATGGTGTTCCTGTCTAAAC-TATCAAACG [7663]  
Mmu ACA--CCTTAGCAGAGCTGTGGAGTGTGACAATGGTGTTCCTGTCCAAAC-CATCAAACG [7587]  
Mdo ATA--CCCTACCAGAGCTATGGAGTGTGACAATGGTGTTCCTGTCCAGTC-TATCAAACG [7197]  
Meu -----CCCTGCCAGAGCTATGGAGTGTGACAATGGTGTTCCTGTCCAGTC-TATCAAACG [5977]  
Oan CTA--TGCTACCAGAGCTGTGGAGTGTGACAATGGTGTTCCTGTCCAGTC-TATCAAACG [6676]  
Aca GCA--TCCTGCTGGAGCTGTGGAGTGTGACAATGGTGTTCCTGTATCCAATC-CGTCAAACG [7267]  
Pbi ATA--TTCTGCTGGAGCTTTGGAGTGTGACAATGGTGTTCCTGTATCCAATC-TCTCAAACG [7662]  
Cpi ATC--TACTGCCAGAGCTGTGGAGTGTGACAATGGTGTTCCTGTCCAATC-TATCAAACG [8010]  
Cmy ATC--TACTGCCAGAGCTGTGGAGTGTGACAATGGTGTTCCTGTCCAATC-TATCAAACG [7760]  
Psi ATC--TACTGCCAGAGCTGTGGAGTGTGACAATGGTGTTCCTGTCCAATA-TATCAAACG [7340]  
Asp ATC--TACTGCCAGAGCTGTGGAGTGTGACAATGGTGTTCCTGTCCAATA-TATCAAACG [7084]  
Ami GGA--TACTATCAGAGCTGTGGAGTGTGACAATGGTGTTCCTGTCCAATC-TATCAAACG [7407]  
Asi GGA--TACTATCAGAGCTGTGGAGTGTGACAATGGTGTTCCTGTCCAATC-TATCAAACG [7558]  
Tgu ATG--TGCTCCCAGAGCTGTGGAGTGTGACAATGGTGTTCCTGTGCC-ATC-TATCAAACG [5826]  
Cli ATG--TGCTGCCCCAGAGCTGTGGAGTGTGACAATGGTGTTCCTGTCCCTGGC-TATCAAACG [7431]  
Gga ATG--TACGGCCAGAGCTATGGAGTGTGACAATGGTGTTCCTGTCCAATC-TATCAAACG [6850]  
Xtr ATT--GACTGCTGGAGCTATGGAGTGTGACAATGGTGTTCCTGTGCAGAGC-TATCAAACG [7359]  
Lch ACT--ATCTGTCCAGAGCTGTGGAGTGTGACAATGGTGTTCCTGTCTGATCATATCAAACG [7783]  
Dre ACA--GTCTCCAGAGCTGTGGAGTGTGACAATGGTGTTCCTGTATCATCTGTCTCAAACG [7164]

Hsa CCATTATCACACTAAATAGCTACTGCTAGG--GGCCTCTCTCTCCGTGTTTACAGCGGAC [7721]  
Mmu CCATTATCACACTAAATAGCTACTGCTAGG--GGCCTCTCTCTCCGTGTTTACAGCGGAC [7645]  
Mdo CCATTATCACACTAAATAGCTACTGTTGGG--GGCCTCTCTCTCCGTGTTTACAGCGGAC [7255]  
Meu CCATTATCACACTAAATAGCTACTGTTGGG--GGCCTCTCTCTCCGTGTTTACAGCGGAC [6035]  
Oan CCATTATCACACTAAATAGCTACTGTAGGG----- [6706]  
Aca CCATTATCACACTAAATAGCTACTGCTAGA--GGCCCCCTCTCTGCGTGTTTACAGCGGAC [7325]  
Pbi CCATTATCACACTAAATAGCTACTGTTAGA--GGCCCCCTCTCTGCGTGTTTACAGCGGAC [7720]  
Cpi CCATTATCACACTAAATAGCTACTGTTAGA--GGCCCCCTCTCTCCGTGTTTACAGCGGAC [8068]  
Cmy CCATTATCACACTAAATAGCTACTGTTAGA--GGCCCCCTCTCTCCGTGTTTACAGCGGAC [7818]  
Psi CCATTATCACACTAAATAGCTACTGTTAGA--GGCCCCCTCTCTCCGTGTTTACAGCGGAC [7398]  
Asp CCATTATCACACTAAATAGCTACTGTTAGA--GGCCCCCTCTCTCCGTGTTTACAGCGGAC [7142]  
Ami CCATTATCACACTAAATAGCTACTGTTAGA--GGCCCCCTCTCTGCGTGTTTACAGCGGAC [7465]  
Asi CCATTATCACACTAAATAGCTACTGTTAGA----- [7588]  
Tgu CCATTATCACACTAAATAGTTCTGTTAAA-----CTCTCCGTGTTTACAGCGGAC [5877]  
Cli CCATTATCACACTAAATAGCTACTGGTAGA--GGCCCCCTCTCTCCGTGTTTACAGCGGAC [7489]  
Gga CCATTATCACACTAAATAGCTACTGGTAGA----- [6880]  
Xtr CCATTATCACACTAATGAGCTACTGCAGGC--GCCCTCTCTCTCCGTGTTTACAGCGGAC [7417]  
Lch CCATTATCACACTAAATAGCTATAGCAAGA--TTTTTCTCTCTTTCGTGTTTACAGCGGAC [7841]  
Dre CCATTATCACACTAAATAGCCACGGTGTGA--CCTGCTTTTCTTTCGTGTTTACAGCGGAC [7222]

Hsa CTTGATTTAAATGTCCATACAATTAAGGCACGCGGTGAATGCCAAGAATGGGGCT--AGA [7779]  
Mmu CTTGATTTAAATGTCCATACAATTAAGGCACGCGGTGAATGCCAAGAATGGGGCT--AGA [7703]  
Mdo CTTGATTTAAATGTCCATACAATTAAGGCACGCGGTGAATGCCAAGAATGGGGCT--AGA [7313]  
Meu CTTGATTTAAATGTCCATACAATTAAGGCACGCGGTGAATGCCAAGAATGGGGCT--AGA [6093]  
Oan -----GGA [6709]  
Aca CTTGATTTAAATGTCCATACAATTAAGGCACGCGGTGAATGCTAAGAACGAGGCT--GGA [7383]  
Pbi CTTGATTTAAATGTCCATACAATTAAGGCACGCGGTGAATGCTAAGAACGAGGCT--CGA [7778]  
Cpi CTTGATTTAAATGTCCATACAATTAAGGCACGCGGTGAATGCCAAGAACGAGGCT--CGA [8126]  
Cmy CTTGATTTAAATGTCCATACAATTAAGGCACGCGGTGAATGCCAAGAACGAGGCT--CGA [7876]  
Psi CTTGATTTAAATGTCCATACAATTAAGGCACGCGGTGAATGCCAAGAACGGGGCT--CGG [7456]  
Asp CTTGATTTAAATGTCCATACAATTAAGGCACGCGGTGAATGCCAAGAACGGGGCT--CGG [7200]  
Ami CTTGATTTAAATGTCCATACAATTAAGGCACGCGGTGAATGCCAAGAACGGGGCC--CGG [7523]  
Asi ----- [7588]  
Tgu CTTGATTTAAATGTCCATACAATTAAGGCACGCGGTGAATGCCAAGAACGAGGCT--TAA [5935]

Cli CTTGATTTAAATGTCCATACAATTAAGGCACGCGGTGAATGCCAAGAACGAGGCT--CAA [ 7547 ]  
Gga -----CCA [ 6883 ]  
Xtr CTTGATTTAAATGTCCATACAATTAAGGCACGCGGTGAATGCCAAGAGAGGGGCT--TAA [ 7475 ]  
Lch CTTGATTTAAATGTCCATACAATTAAGGCACGCGGTGAATGCCAAGAGAGAGGCC--TGA [ 7899 ]  
Dre CTTGATTTAAATGTCCATACAATTAAGGCACGCGGTGAATGCCAAGAGAGATGGC--TCA [ 7280 ]

Hsa GGCTCT-G-CTCTCCGTGTTTACAGCGGACCTTGATTTAATGTCATACAATTAAGG-CAC [ 7836 ]  
Mmu GACTCT-G-CTCTCCGTGTTTACAGCGGACCTTGATTTAATGTCATACAATTAAGG-CAC [ 7760 ]  
Mdo GACTCT-GTCTCTCCGTGTTTACAGCGGACCTTGATTTAATGTCATACAATTAAGG-CAC [ 7371 ]  
Meu GACTCT-GTCTCTCCGTGTTTACAGCGGACCTTGATTTAATGTCATACAATTAAGG-CAC [ 6151 ]  
Oan GACTCT-GCCTCTCCGTGTTTACAGCGGACCTTGATTTAATGTCATACAATTAAGGGCAC [ 6768 ]  
Aca GGCGCT-GCCTCTCCGTGTTTACAGCGGACCTTGATTTAATGTCATACAATTAAGG-CAC [ 7441 ]  
Pbi GGCTCT-GTCTCTCCGTGTTTACAGCGGACCTTGATTTAATGTCATACAATTAAGG-CAC [ 7836 ]  
Cpi GGCTCT-GACTCTCCGTGTTTACAGCGGACCTTGATTTAATGTCATACAATTAAGG-CAC [ 8184 ]  
Cmy GGCTCT-GACTCTCCGTGTTTACAGCGGACCTTGATTTAATGTCATACAATTAAGG-CAC [ 7934 ]  
Psi GGCTCT-GCCTCTCCGTGTTTACAGCGGACCTTGATTTAATGTCATACAATTAAGG-CAC [ 7514 ]  
Asp GGCTCT-GCCTCTCCGTGTTTACAGCGGACCTTGATTTAATGTCATACAATTAAGG-CAC [ 7258 ]  
Ami GGCTCTCGCCTCTCCGTGTTTACAGCGGACCTTGATTTAATGTCATACAATTAAGG-CAC [ 7582 ]  
Asi ----- [ 7588 ]  
Tgu GGCTCT-GACTCTCCGTGTTTACAGCGGACCTTGATTTAATGTCATACAATTAAGG-CAC [ 5993 ]  
Cli GGCTCT-GACTCTCCGTGTTTACAGCGGACCTTGATTTAATGTCATACAATTAAGG-CAC [ 7605 ]  
Gga GGCTCT-GCCTCTCCGTGTTTACAGCGGACCTTGATTTAATGTCATACAATTAAGG-CAC [ 6941 ]  
Xtr GTCTCT-GACTCTCCGTGTTTACAGCGGACCTTGATTTAATGTCATACAATTAAGG-CAC [ 7533 ]  
Lch GACTCT-GACTCTGCGTGTTTACAGCGGACCTTGATTTAATGTCATACAATTAAGG-CAC [ 7957 ]  
Dre GACTCT-GGCTTTCCGTGTTTACAGCGGACCTTGATTTAATGTCCTTACAATTAAGG-CAC [ 7338 ]

Hsa GCGGTGAATGCCAAGAGCGGAGCCTACGG--CCTGAGGGCCCTCTGCGTGTTTACAGCG [ 7894 ]  
Mmu GCGGTGAATGCCAAGAGCGGAGCCTACGG--CCTGAGGGCCCTCTGCGTGTTTACAGCG [ 7818 ]  
Mdo GCGGTGAATGCCAAGAGCGGAGCCTGAAA--CCAGAGTACCCCTCTGCGTGTTTACAGCG [ 7429 ]  
Meu GCGGTGAATGCCAAGAGCGGAGCCTGAAA--CCAGAGTGCCCTCTGCGTGTTTACAGCG [ 6209 ]  
Oan TCGGTGAATGCCAAGAGCGGAGCCCCGGA----- [ 6797 ]  
Aca GCGGTGAATGCCAAGAGCGGGCTGGAAG--CCCGGGCCCTTCTCTGCGTGTTTACAGCG [ 7499 ]  
Pbi GCGGTGAATGCCAAGAGCAGGGCTTGAAG--CCTGGGCCCTTCTCTCCGTGTTTACAGCG [ 7894 ]  
Cpi GCGGTGAATGCCAAGAGCGGAGCCTGAAG--GACGAGCCCTCTCTGCGTGTTTACAGCG [ 8242 ]  
Cmy GCGGTGAATGCCAAGAGCGGAGCCTGAAG--GCCGAGCCCTCTCTGCGTGTTTACAGCG [ 7992 ]  
Psi GCGGTGAATGCCAAGAGCGGAGCCTGAAG--GCCGAGCCCTCTCTGCGTGTTTACAGCG [ 7572 ]  
Asp GCGGTGAATGCCAAGAGCGGAGCCTGAAG--GCCGAGCCCTCTCTGCGTGTTTACAGCG [ 7316 ]  
Ami GCGGTGAATGCCAAGAGCGGAGCCGGAAG--GGCGAGCCCTCTCTGCGTGTTTACAGCG [ 7640 ]  
Asi -----GCCGATCCCTCTCTGCGTGTTTACAGCG [ 7617 ]  
Tgu GCGGTGAATGCCAAGAGCGGATCCTCAAA--CCCGAGCCCTCTCTGCGTGTTTACAGCG [ 6051 ]  
Cli GCGGTGAATGCCAAGAGCGGATCCTCAAG--CCCGAGCCCTCTCTGCGTGTTTACAGCG [ 7663 ]  
Gga GCGGTGAATGCCAAGAGCGGATCCTCCAG--CCCGAGCCTCTCTCTGCGTGTTTACAGCG [ 6999 ]  
Xtr GCGGTGAATGCCAAGAGTGAGCCTACAT--ACGGAGCCCCCTCTGCGTGTTTACAGCG [ 7591 ]  
Lch GCGGTGAATGCCAAGAGTGAGCCTTAC--ATAGACTCCCTCTCTACGTGTTTACAGCG [ 8015 ]  
Dre GCGGTGAATGCCAAGAGCGGAGCCTTTTA--CAGGCCCGCCACTCTGCGTGTTTACAGCG [ 7396 ]

Hsa GACCTTGATTTAATGTCTATACAATTAAGGCACGCGGTGAATGCCAAGAGAGGGCGCTCC [ 7954 ]  
Mmu GACCTTGATTTAATGTCTATACAATTAAGGCACGCGGTGAATGCCAAGAGAGGGCGCTCC [ 7878 ]  
Mdo GACCTTGATTTAATGTCTATACAATTAAGGCACGCGGTGAATGCCAAGAGAGGTGTCTCC [ 7489 ]  
Meu GACCTTGATTTAATGTCTATACAATTAAGGCACGCGGTGAATGCCAAGAGAGGTGTCTCC [ 6269 ]  
Oan ----- [ 6797 ]  
Aca GACCTTGATTTAATGTCCATACAATTAAGGCACGCGGTGAATGCCAAGAGAG--CGGCTCT [ 7558 ]  
Pbi GACCTTGATTTAATGTCCATACAATTAAGGCACGCGGTGAATGCCAAGAGACCGGTTC [ 7954 ]  
Cpi GACCTTGATTTAATGTCCATACAATTAAGGCACGCGGTGAATGCCAAGAGAGGAGCCTCA [ 8302 ]  
Cmy GACCTTGATTTAATGTCCATACAATTAAGGCACGCGGTGAATGCCAAGAGAGGAGCCTCA [ 8052 ]  
Psi GACCTTGATTTAATGTCCATACAATTAAGGCACGCGGTGAATGCCAAGAGAGGAGCCTCA [ 7632 ]  
Asp GACCTTGATTTAATGTCCATACAATTAAGGCACGCGGTGAATGCCAAGAGAGGAGCCTCA [ 7376 ]

Ami GACCTTGATTTAATGTCCATACAATTAAGGCACGCGGTGAATGCCAAGAGAGGAGCCTCA [ 7700 ]  
Asi GACCTTGATTTAATGTCTATAAAAATTAAGGCACGCGGTGAATGCCAAGAGAGGAGCCTCA [ 7677 ]  
Tgu GACCTTGATTTAATGTCCATACAATTAAGGCACGCGGTGAATGCCAAGAGAGGAGCCTCA [ 6111 ]  
Cli GACCTTGATTTAATGTCCATACAATTAAGGCACGCGGTGAATGCCAAGAGAGGAGCCTCA [ 7723 ]  
Gga GACCTTGATTTAATGTCCATACAATTAAGGCACGCGGTGAATGCCAAGAGAGGAGCCTCA [ 7059 ]  
Xtr GACCTTGATTTAATGTCCATACAATTAAGGCACGCGGTGAATGCCAAGAGAGGGGCTTTA [ 7651 ]  
Lch GACCTTGATTTAATGTTTACATACAATTAAGGCACGCGGTGAATGCCAAGAGAGGAGCCTCA [ 8075 ]  
Dre GACCTTGATTTAATATCCATACAATTAAGGCACGCGGTGAATGCCAAGAGAGGGGTCTTA [ 7456 ]

Hsa GC----- [ 7956 ]  
Mmu GC----- [ 7880 ]  
Mdo GC----- [ 7491 ]  
Meu GC----- [ 6271 ]  
Oan ----- [ 6797 ]  
Aca CA--CCAGGGCTTGGCCCTTCGTGTTTACAGTGGACCTTGATTTTCATGTGGACACAATTA [ 7616 ]  
Pbi CT--CTTGGCTTAAGCCCTTCGTGTTTACAGCGGACCTTGATTTAATTTTCGATACAATTA [ 8012 ]  
Cpi CA--CTCGGCTTCCGCTTTTTCGTGTTTACAGCGGACCTTGATTTAATTTTC-ATACAATTA [ 8359 ]  
Cmy CA--CTCGGCTTCCGCTTTTTCGTGTTTACAGCGGACCTTGATTTAATTTTC-ATACAATTA [ 8109 ]  
Psi CA----- [ 7634 ]  
Asp CA----- [ 7378 ]  
Ami CA--CGCGGCCTCGGCTCTCCGTGTTTACAGCGGACCTTGATTTAATGTC-ACACAATTA [ 7757 ]  
Asi CA----- [ 7679 ]  
Tgu CA----- [ 6113 ]  
Cli CA----- [ 7725 ]  
Gga CA--ATCAGCCCCAGCGTTTTTGTGTTTCACTGCAGACCTTGATTTAATGTC-ACACGATTA [ 7116 ]  
Xtr TC----- [ 7653 ]  
Lch AA--TGTGGTTGAAGCTCTGCGTGTTCACCGTGGACCTTGATTTAATTTT-ATACAATTA [ 8132 ]  
Dre AA--TTGGGTTTTTGCTCTTTGTGTTTACAGTGGACCTTGATTTAATTTCAATACAATTA [ 7514 ]

Hsa -----GCTGGCGACGGGA-CATTATTAC [ 7978 ]  
Mmu -----GCCGGTGACAGCA-CATTATTAC [ 7902 ]  
Mdo -----GCTGACAATGGGT-CATTATTAC [ 7513 ]  
Meu -----GCTGACAATGGGT-CATTATTAC [ 6293 ]  
Oan -----GCTGGCAACTGCC-CATTATTAC [ 6819 ]  
Aca AGGCACGCGGTGAATGCCAAGAGCCCAGCCCCTGC--GCTCCCCGCGGTC-CATTATTAC [ 7673 ]  
Pbi AGGCACGCGGTGAATGCCAAGAGAGAAGCCACGTC--GCTGACTGCGGCT-CATTATTAC [ 8069 ]  
Cpi AGGCACGCGGTGAATGCCAAGAGAGAAGCCGGACT--GCTGGTGCCGGCC-CATTATTAC [ 8416 ]  
Cmy AGGCACGCGGTGAATGCCAAGAGAGAAGCCGGACT--GCTGGTGCCGGCC-CATTATTAC [ 8166 ]  
Psi -----GCTGGTGCCGGCT-CATTATTAC [ 7656 ]  
Asp ----- [ 7378 ]  
Ami AGGCACGCGGTGAATGCCAAGAGA-GGGGCCGCC--GCTGGTGACGGCC-CATTATTAC [ 7813 ]  
Asi -----GCTGGTGACGGCC-CATTATTAC [ 7701 ]  
Tgu -----GCTGGTGACGGCC-CATTATTAC [ 6135 ]  
Cli -----GCTGGTGACGGCC-CATTATTAC [ 7747 ]  
Gga AGGCACGAGTGAATGCCAAAGTTTTGGGGCAGCCT--GCTGGTGACGGCC-CATTATTAC [ 7173 ]  
Xtr -----GTTGGTGGCTGTG-CATTATTAC [ 7675 ]  
Lch AGGCACGCGGTGAATGCCAAGAGAGAAACCAACAT--GTTGGTGACGGTC-CATTATTAC [ 8189 ]  
Dre AGGCACGCGGTGAATGCCAAGAGAGAAGCCAACAG--CGGCCTCACGGTT-CATTATTAC [ 7571 ]

Hsa TTTTGGTACGCGCTGTGACACTTCAAACCTCGTACCGTGAGTAATAATGCGCCGTCCA-CG [ 8037 ]  
Mmu TTTTGGTACGCGCTGTGACACTTCAAACCTCGTACCGTGAGTAATAATGCGCGGTCCAG-CA [ 7961 ]  
Mdo TTTTGGTACGCGCTGTGACACATCAAACCTCGTACCGTGAGTAATAATGCGCCATTGG-CA [ 7572 ]  
Meu TTTTGGTACGCGCTGTGACACATCAAACCTCGTACCGTGAGTAATAATGCGCCATTGG-CA [ 6352 ]  
Oan TTTTGGTACGCGCTGTGACGCTTCAAACCTCGTACCGTGAGTAATAATGCGTGGCTGG-CA [ 6878 ]  
Aca TTTTGGTACGCGCTGTGCCACTTCAAACCTCGTACCGTGAGTAATAATGCGCTGAGGGACA [ 7733 ]  
Pbi TTTTGGTACGCGCTGTGCCACTTCAAACCTCGTACCGTGAGTAATAATGCGCGGAGGGCCA [ 8129 ]  
Cpi TTTTGGTACGCGCTGTGACACTTCAAACCTCGTACCGTGAGTAATAATGCGCTGCGGC-CA [ 8475 ]

Cmy TTTTGGTACGCGCTGTGACACTTCAAACCTCGTACCGTGAGTAATAATGCGCTGCGGC-CA [8225]  
Psi TTTTGGTACGCGCTGTGACACTTCAAACCTCGTACCGTGAGTAATAATGCGCTGCGGC-CA [7715]  
Asp ----- [7378]  
Ami TTTTGGTACGCGCTGTGACACTTCAAACCTCGTACCGTGAGTAATAATGCGCTGCGGC-CA [7872]  
Asi TTTTGGTACGCGCTGTGACACTTCAAACCTCGTACCGTGAGTAATAATGCGCTGCGGC-CA [7760]  
Tgu TTTTGGTACGCGCTGTGACACTTCAAACCTCGTACCGTGAGTAATAATGCGCTGTGGC-CA [6194]  
Cli TTTTGGTACGCGCTGTGACACTTCAAACCTCGTACCGTGAGTAATAATGCGCTGTGGC-CA [7806]  
Gga TTTTGGTACGCGCTGTGACACTTCAAACCTCGTACCGTGAGTAATAATGCGCTGTGGT-CA [7232]  
Xtr TTTTGGTACGCGCTGTGTCACATCAAACCTCGTACCGTGAGTAATAATGCGCAGCTGC-CA [7734]  
Lch TTTTGGTACGCGCTGTGACACTTCAAACCTCGTACCGTGAGTAATAATGCGCAGTGGC-CA [8248]  
Dre TTTTGGTACGCGCTATGCCACTCTCAAACCTCGTACCGTGAGTAATAGTGCCTGTGAC-TG [7630]

Hsa GC--GAGCTGTTGGATTTCGGGGCCGTAGCACTGTCTGAGAGG-TTTACATTTCTCACAGT [8094]  
Mmu GC--GAGCTGTTGGATTTCGGGGCCGTAGCACTGTCTGAGAGG-TTTACATTTCTCACAGT [8018]  
Mdo GC--GAGCTGTTGGATTTCGGGGCCGTAGCACTGTCTGAGAGG-TTTACATTTCTCACAGT [7629]  
Meu GC--GAGCTGTTGGATTTCGGGGCCGTAGCACTGTCTGAGAGG-TTTACATTTCTCACAGT [6409]  
Oan GC--GAGCCGCTGGATTTCGGGGCCGATACACGGTCTGAGGGG-TTTACGAGTCTCACAGT [6935]  
Aca GC--GAGCTGTTGGATTTCGGGGCCGTAACACTGTCTGAGAGG-GTTACATTTCTCACAGT [7790]  
Pbi GC--GAGCTGTTGGATTTCGGGGCCGTAACACTGTCTGAGAGG-GTTACATTTCTCACAGT [8186]  
Cpi GC--GAGCTGTTGGATTTCGGGGCCGTAACACTGTCTGAGAGG-GTTACATTTCTCACAGT [8532]  
Cmy GC--GAGCTGTTGGATTTCGGGGCCGTAACACTGTCTGAGAGG-GTTACATTTCTCACAGT [8282]  
Psi GC--GAGCTGTTGGATTTCGGGGCCGTAACACTGTCTGAGAGA-GTTACATTTCTCACAGT [7772]  
Asp ----GAGCTGTTGGATTTCGGGGCCGTAACACTGTCTGAGAGA-GTTACATTTCTCACAGT [7433]  
Ami GC--GAGCTGTTGGATTTCGGGGCCGTAACACTGTCTGAGAGG-GTTACATTTCTCACAGT [7929]  
Asi GC--GAGCTGTTGGATTTCGGGGCCGTAACACTGTCTGAGAGG-GTTACATTTCTCACAGT [7817]  
Tgu GC--GAGCTGTTGGATTTCGGGGCCGTAACACTGTCTGAGAGG-TTTACATTTCTCACAGT [6251]  
Cli GC--GAGCTGTTGGATTTCGGGGCCGTAACACTGTCTGAGAGG-TTTACATTTCTCACAGT [7863]  
Gga GC--GAGCTGTTGAATTCGGGGCCGTAACACTGTCTGAGAGG-TTTATATTTCTCACAGT [7289]  
Xtr AT--GAGCGCTGGAACCGGGCCCGGAGCGCTGTCTGAGAGGGTTAAGTTTCTCACAGT [7792]  
Lch GC--GAGCTGTTGGATACGGGGCCGAGCACTGTCTGAGAGG-GCTGTATTTCTCACAGT [8305]  
Dre GT--GAGCGCTGAATGCGGGCCGTGGCGCTGTCTGAGACGCTCTACTATTCTCACAGT [7688]

Hsa GAACCGGTCTCTTTTTTTCAGCTGCTTTC--GTGCAGTGGGAAGGGGGCCGATACACTGTAC [8152]  
Mmu GAACCGGTCTCTTTTTTTCAGCTGCTTTC--GTGCAGTGGGAAGGGGGCCGATGCACTGTAA [8076]  
Mdo GAACCGGTCTCTTTTTTTCAGCTGCTTTC--GTGCAGCAGGAAGGGGGCCGTTACACTGTCA [7687]  
Meu GAACCGGTCTCTTTTTTTCAGCTGCTTTC--GTGCAGCGGGAAGGGGGCCGTTACACTGTTA [6467]  
Oan GAACCGGTCTCTTTTTTTCAGTTGCTTCC--GGACAGCCGGAAGGGGGCCGTTACACTGTAA [6993]  
Aca GAACCGGTCTCTTTTTTTCAGCTGCTTTC--GTACAGTTGGAAGGGGGCCGTTACACTGTAA [7848]  
Pbi GAACCGGTCTCTTTTTTTCAGCTGCTTTC--GTGCAGTTGGAAGGGGGCCGTTACACTGTAA [8244]  
Cpi GAACCGGTCTCTTTTTTTCAGCTGCTTTC--GGGCAGTTGGAAGGGGGCCGTTACACTGTAA [8590]  
Cmy GAACCGGTCTCTTTTTTTCAGCTGCTTTC--GGGCAGTTGGAAGGGGGCCGTTACACTGTAA [8340]  
Psi GAACCGGTCTCTTTTTTTCAGCTGCTTTC--GGGCAGTTGGAAGGGGGCCGTTACACTGTAA [7830]  
Asp GAACCGGTCTCTTTTTTTCAGCTGCTTTC--GGGCAGTTGGAAGGGGGCCGTTACACTGTAA [7491]  
Ami GAACCGGTCTCTTTTTTTCAGCTGCTTTC--GTGCAGTTGGAAGGGGGCCGTTACACTGTAA [7987]  
Asi GAACCGGTCTCTTTTTTTCAGCTGCTTTC--GTGCAGTTGGAAGGGGGCCGTTACACTGTAA [7875]  
Tgu GAACCGGTCTCTTTTTTTCAGCTGCTTTC--GTGCGCTGGAAGGGGGCCGTTACACTGTAA [6309]  
Cli GAACCGGTCTCTTTTTTTCAGCTGCTTTC--GTGCAGCTGGAAGGGGGCCGTTACACTGTAA [7921]  
Gga GAACCGGTCTCTTTTTTTCAGCTGCTTTC--GTCCAGCTGGAAGGGGGCCGTTACACTGTAA [7347]  
Xtr GAACCGGTCTCTTTTTTTCAGTCTCTTTC--GTGCAGCTGGAACGGGGCCGTTACACTGTAA [7850]  
Lch GAACCGGTCTCTTTTTTTCAGCTGTCTTC--TTACAGTTGAGAGGGGGCCGTTACACTGTAA [8363]  
Dre GAACCGGTCTCTTTTTTTCAGCCGCTAC--GAGTGCTGGGAGACGGGGCCGTTGGCACTGTAT [7746]

Hsa GAGAGTGAGTAGCAGG-TCTCACAGTGAACCGGTCTCTTTT-CCCTACTGT--CTCCTTTG [8208]  
Mmu GAGAGTGAGTAGCAGG-TCTCACAGTGAACCGGTCTCTTTT-CCCTACTGT--CTCCTTTG [8132]  
Mdo GAGAGTGAGTAGCAGG-TCTCACAGTGAACCGGTCTCTTTT-CCCTGCTGT--CTCCTTTG [7743]  
Meu GAGAGTGAGTAGCAGG-TCTCACAGTGAACCGGTCTCTTTT-CCCTGCTGT--CTCCTTTG [6523]  
Oan GAGAGTGAGTACCAGG-TCTCACAGTGAACCGGTCTCTTTT-CCCGACTGG--CTCCTTTG [7049]

Aca GAGAGTGAGTAGCAGG-TCTCACAGTGAACCGGTCTCTTT-TCCTACTGT--CTCTCTCG [7904]  
Pbi GAGAGTGAGTAGCAGG-TCTCACAGTGAACCGGTCTCTTT-TCTTACTGT--CTCTCTCG [8300]  
Cpi GAGAGTGAGTAGCAGG-TCTCACAGTGAACCGGTCTCTTT-TCCTACTGT--CTCTCTTG [8646]  
Cmy GAGAGTGAGTAGCAGG-TCTCACAGTGAACCGGTCTCTTT-TCCTACTGT--CTCTCTTG [8396]  
Psi GAGAGTGAGTAGCAGG-TCTCACAGTGAACCGGTCTCTTT-TCCTACTGT----- [7878]  
Asp GAGAGTGAGTAGCAGG-TCTCACAGTGAACCGGTCTCTTT-TCCTACTGT----- [7539]  
Ami GAGAGTGAGTAGCAGG-TCTCACAGTGAACCGGTCTCTTT-TCCTACTGT--CCCTCTCA [8043]  
Asi GAGAGTGAGTAGCAGG-TCTCACAGTGAACCGGTCTCTTT-TCCTACTGT--CCCTCTCA [7931]  
Tgu GAGAGTGAGTAGCAGG-TCTCACAGTGAACCGGTCTCTTT-TCCTGCTGT----- [6357]  
Cli GAGAGTGAGTAGCAGG-TCTCACAGTGAACCGGTCTCTTT-TCCTACTGT--CCCTCTCG [7977]  
Gga GAGAGTGAGTAGCAGG-TCTCACAGTGAACCGGTCTCTTT-TCCTGCTGT----- [7395]  
Xtr GAGAGTGAGTAGTAGG-TCTCACAGTGAACCGGTCTCTTT-TCTTACTGT--CTCTCTCA [7906]  
Lch GAGAGTGAGTAGCAGG-TCTCACAGTGAACCGGTCTCTTT-TCCTGCTGT--CTCTCTCG [8419]  
Dre GAGATTTCATGTAGGCTTTCTCACAGTGAACCGGTCTCTTTTTCCAGCCCT--CCTTTTCA [7804]

Hsa GATCTTTTTTGCGGTCTGGGCTTGCTGTTTCTCTCAACAGTAGTCAGGAAGCCCTTACCCC [8268]  
Mmu GATCTTTTTTGCGGTCTGGGCTTGCTGTT-CTCTCGACAGTAGTCAGGAAGCCCTTACCCC [8191]  
Mdo GATCTTTTTTGCGGTCTGGGCTTGCTGTTTCTTAAATCAGTAGTCAGGAAGCCCTTACCCC [7803]  
Meu GATCTTTTTTGCGGTCTGGGCTTGCTGTTTGTCTAATCAGTAGTCAGGAAGCCCTTACCCC [6583]  
Oan GATCTTTTTTGCGGTCTGGGCTTGCTGTTTCTTAAATCAGTAGTCAGGAAGCCCTTACCCC [7109]  
Aca GATCTTTTTTGCGGTCTGGGCTTGCTGTTTCTCCAGTCAGCAGTCAGGAAGCCCTTACCCC [7964]  
Pbi GATCTTTTTTGCGGTCTGGGCTTGCTGTTTCTCCAATAAGTAGCCAGGAAGCCCTTACCCC [8360]  
Cpi GATCTTTTTTGCGGTCTGGGCTTGCTGTTTCTCCAATCAGTAGTCAGGAAGCCCTTACCCC [8706]  
Cmy GATCTTTTTTGCGGTCTGGGCTTGCTGTTTCTCCAATCAGTAGTCAGGAAGCCCTTACCCC [8456]  
Psi ----- [7878]  
Asp ----- [7539]  
Ami GATCTTTTTTGCGGTCTGGGCTTGCTGTTTCTCCAACCCACACTCAGGAAGCCCTTACCCC [8103]  
Asi GATCTTTTTTGCGGTCTGGGCTTGCTGTTTCTCCAACCCACACTCAGGAAGCCCTTACCCC [7991]  
Tgu ----- [6357]  
Cli GGTCTTTTTTGCGGTCTGGGCTTGCTGTTTCTCCCGCA-GCACTCAGGAAGCCCTTACCCC [8036]  
Gga ----- [7395]  
Xtr AAGCTTTTTTGCGGTCTGGGCTTGCTGTTTCTCAATCAAAGTATCCAGGAAGCCCTTATCCC [7966]  
Lch GATCTTTTTTGCGGTCTGGGCTTGCTGTTTCTTGAACCAGTAGTCAGGAAGCCCTTACCCC [8479]  
Dre GGTCTTTTTTGCGGTCTGGGCTTGCTGTTTCTTGAACCAGTAGCCAGGAAGCCCTTACCCC [7864]

Hsa AAAAAGTATCTGCGGGAGGCC--TTTCGC-GAATCTTTTTTGCGGTCTGGGCTTGCTGTACA [8325]  
Mmu AAAAAGTATCTACGGGAGGCT--TTTCGC-GAATCTTTTTTGCGGTCTGGGCTTGCTGTACA [8248]  
Mdo AAAAAGTATCTACAGGGGGAC----- [7824]  
Meu AAAAAGTATTTACAGGGGGCC--TTTCGC-GAATCTTTTTTGCGGTCTGGGCTTGCTGTATA [6640]  
Oan AAAAAGTATCTGCGAGAGACC----- [7130]  
Aca AAAAAGTATTTGCGAGGGATC--TTCCCTGGGTCTTTTTGCGGTCTGGGCTTTCTGGGTC [8022]  
Pbi AAAAAGTATTTGCGAGGGATC--TTCTCTGGGTCTTTTTGCGGTCTGGGCTTTCTGGGTC [8418]  
Cpi AAAAAGTATTTGCGAGGGATA--TTTCGC-GAATCTTTTTTGCGGTCTGGGCTTGCTGTATA [8763]  
Cmy AAAAAGTATTTGCGAGGGATA--TTTCGC-GAATCTTTTTTGCGGTCTGGGCTTGCTGTATA [8513]  
Psi -----TTTCGC-GAATCTTTTTTGCGGTCTGGGCTTGCTGTATA [7914]  
Asp ----- [7539]  
Ami AAAAAGTATCCGCGGGGAGC--TTTCGC-GAATCTTTTTTGCGGTCTGGGCTTGCTGTACA [8160]  
Asi AAAAAGTATCCGCGGGGAGC----- [8012]  
Tgu -----TTTCGC-GAATCTTTTTTGCGGTCTGGGCTTGCTGTACA [6393]  
Cli AAAAAGTATCTGCGGGGGGTC--TTTCGC-GAATCTTTTTTGCGGTCTGGGCTTGCTGTACA [8093]  
Gga ----- [7395]  
Xtr AAAAAGAATTTGCGAGGGAGG--TTCTC-AAATCTTTTTTGCGGTCTGGGCTTGCTGTATG [8023]  
Lch AAAAAGTATCTGCGAGGGATA--TCCTC-GAATCTTTTTTGCGGTCTGGGCTTGCTGTAAA [8536]  
Dre AAAAAGTATCTGCGAGGGACC--TTCAC-GAATCTTTTTTGCGGTCTGGGCTTGCTGTTCT [7921]

Hsa TAACTCAA----TAGCCGG-AAGCCCTTACCCCAAAAAGCATTTGCGGAGGGCG--GCTG [8378]  
Mmu TAACTCAA----TAGCCGG-AAGCCCTTACCCCAAAAAGCATTCGCGGAGGGCG--GCTG [8301]

```
Mdo -----ACTC [ 7828 ]
Meu TAACTATG----TAGCCGGGAAGCCCTTACCCCAAAAAGCATTCGAGGAGGACA--ACTC [ 6694 ]
Oan -----GCTC [ 7134 ]
Aca TGTCCAACCCCGTATCAGAAAGCCCTTACCCCAAAAAGCATCCGGGGCTGGAC--GCC [ 8080 ]
Pbi TGTCCAACCCCGTATCAGAAAGCCCTTACCCCAAAAAGCATCCGGGGTGTAC--GCC [ 8475 ]
Cpi TAACTACC----TAGCCGGGAAGCCCTTACCCCAAAAAGCATTCGCGGAGGGCG--GCCG [ 8817 ]
Cmy TAACTACC----TAGCCGGGAAGCCCTTACCCCAAAAAGCATTCGCGGAGGGCG--GCCG [ 8567 ]
Psi TAACTACC----TAGCCGGGAAGCCCTTACCCCAAAAAGCATTCGCGGAGGGCG--GCCG [ 7968 ]
Asp -----GCCG [ 7543 ]
Ami TAACTACC----TAGCCGGGAAGCCCTTACCCCAAAAAGCATTCGCGGAGGGCG--GCC [ 8214 ]
Asi -----GCC [ 8016 ]
Tgu TAACTACC----TACCCGGGAAGCCCTTACCCCAAAAAGCATTCGCGGAGGGCG----- [ 6443 ]
Cli TAACTACC----TACCCGGGAAGCCCTTACCCCAAAAAGCATTCGCGGAGGGCG----- [ 8143 ]
Gga ----- [ 7395 ]
Xtr TAAATACC----TAGCCGGGAAGCCCTTACCCCAAAAAGCATTTGCGGAGGGCG----- [ 8073 ]
Lch TGAATACC----TATCCGGGAAGCCCTTACCCCAAAAAGCATTTGCGGAGGGCG--TTGT [ 8590 ]
Dre CAACTA-----TCAATGGGAAGCCCTTACCCCAAAAAGCATTTGCGGAGGGCG----- [ 7969 ]

Hsa CTGGCCAGAGCTCTTTTTCACATTGTGCTACTGTCTGCACCTGTCACTAGCAGTGCAATGT [ 8438 ]
Mmu CTGGCCGAGCTCTTTTTCACATTGTGCTACTGTCTA-ACGTGTACCGAGCAGTGCAATGT [ 8360 ]
Mdo CTGGCCAGAGCTCTTTTTCACATTGTGCTACTGTCTGCACCTATCACTAGCAGTGCAATGT [ 7888 ]
Meu CTGGCCGGGGCTCTTTTTCACATTGTGCTACTGTCTGCGCTTGTCACTAGCAGTGCAATGT [ 6754 ]
Oan CCGGCCGAGCTCTTTTTCACATTGTGCTACTGTCTGCGCCCGTCACTAGCAGTGCAATGT [ 7194 ]
Aca CTGTCCAAGGCTCTTTTTCACATTGTGCTTCTGTCTGTGCCCCGACCCAAGCAGTGCAATGT [ 8140 ]
Pbi CTGCCCCGAGGCTCTTTTTCACATTGTGCTACTG----AGCCCAACCCAAGCAGTGCAATGT [ 8531 ]
Cpi CCGTCCTGGGCTCTTTTTCACATTGTGCTACTGTCTGAGCCCCTGCCAAGCAGTGCAATGT [ 8877 ]
Cmy CCATCCTGGGCTCTTTTTCACATTGTGCTACTGTCTGAGCCCCTGCCAAGCAGTGCAATGT [ 8627 ]
Psi CCGTCCTGGGCTCTTTTTCACATTGTGCTACTGTCTGAGCCCCTGCCAAGCAGTGCAATGT [ 8028 ]
Asp CCGTCCTGGGCTCTTTTTCACATTGTGCTACTGTCTGAGCCCCTGCCAAGCAGTGCAATGT [ 7603 ]
Ami CTGTCCAAGGCTCTTTTTCACATTGTACTACTGTATGAGCCCCTGCCAAGCAATGCAATGT [ 8274 ]
Asi CTGTCCAAGGCTCTTTTTCACATTGTACTACTATATGAGCCCCTGCCAAGCAATGCAATGT [ 8076 ]
Tgu ----- [ 6443 ]
Cli ----- [ 8143 ]
Gga ----- [ 7395 ]
Xtr ----- [ 8073 ]
Lch GTTGTCTGAACCCCTTTTTCACATTGTACTACTGTATG--CTATCCAAAGGCAGTGCAATAT [ 8648 ]
Dre ----- [ 7969 ]

Hsa TAAAAGGGCATT-GGCCGTGTAG--GGCTGCCCCGACACTCTTTTCCC-TGTTGCACTACT [ 8494 ]
Mmu TAAAAGGGCATC-GGCCTTGTAG--GGCTTGTGGACACTCTTTTCCC-TGTTGCACTACT [ 8416 ]
Mdo AAAAAGGGCATT-GGCTGGGCAG--GGCTGCCCCGAAAGCTCTTTTCCC-TGTTGCCCTGCT [ 7944 ]
Meu AAAAAGGGCATT-GGCTGGGCAG--GGGCTGCCCAAAGCTCTTTTCCC-TGTTGCCCTGCT [ 6810 ]
Oan AATAAGGGGCTTCGGCGGGGCAG----- [ 7217 ]
Aca TAAAAGGGCATT-GGGTGGGTGG--GGGCGTCTGCCACTCTTTTCCCCTGTTGCACTACT [ 8197 ]
Pbi AAAAAGGGCATT-GGGTGGGTGG--GAGCAGTCTGCTACTCTTTTCCCT-TGTTGCGCTACT [ 8587 ]
Cpi CAAAAGGGCATC-GGGCAGGCGG--AGGCAGGCTGCCACTCTTTTCCC-TGTTGCACTACT [ 8933 ]
Cmy CAAAAGGGCATC-GGGCGGGCGG----- [ 8649 ]
Psi CAAAAGGGCATC-GGGCAGGTGG----- [ 8050 ]
Asp CAAAAGGGCATC-GGGCAGGCGG--AGGCAGGCTGCCACTCTTTTCCCCTGTTGCACTACTG [ 7660 ]
Ami AAAAAGGGCATT-GGGTAGGTGG----- [ 8296 ]
Asi AAAAAGGGCATT-GGGTAGGTGG----- [ 8098 ]
Tgu -----GCCGGGCTGCCC-CTCTTTTCCC-TGTTGCACTACT [ 6476 ]
Cli -----GCCGGGCTGCCC-CTCTTTTCCC-TGTTGCACTACT [ 8176 ]
Gga -----GGCGGGCTGCCC-CTCTTTTCCC-TGTTGCACTACT [ 7428 ]
Xtr -----AGGCCGCTGACACTCTTTTCCC-TGTTGCACTACT [ 8107 ]
Lch CAAAAGGGCATT-AGCCATCCTC--GGACTGCCTGTCACTCTTTTCCC-TGTTGCACTACT [ 8704 ]
Dre -----CTGTTGCCCTGACACTCTTTTCCC-TGTTGCACTACT [ 8003 ]
```

Hsa AT--AGGCCGCTGGGAAGCAGTGCAATGATGAAAGGGCATCGGTTCAGGT--GCTGGCCGC [8550]  
Mmu GT--GGGCCTCTGGGAAGCAGTGCAATGATGAAAGGGCATCTGTTCGGGC--GCTGGCTGC [8472]  
Mdo GT----CCGGTACCTAGCAGTGCAATTGTGAAAGGGCATTGGTGAGGC----- [7989]  
Meu GT----CCAGTCACTGAGCAGTGCAATTGTGAAAGGGCATTGGTCAGGC----- [6855]  
Oan -----GCTGCCGCC [7226]  
Aca GTCCAACGTCACAGCTAGCAGTGCAATAATGAAAGGGCGTCAGCCGCTC--GCTGGGATT [8255]  
Pbi GTTCAGCTTCGCCTCTAGCAGTGCAATAATGAAAGGGCATCAGCCCTC--GCTGGAACC [8645]  
Cpi GTT-AAACTTGTAGCTAGCAGTGCAATAATGAAAGGGCGTCGGTCTGCC--GCTGGTATC [8990]  
Cmy -----GCTGGTATC [8658]  
Psi -----GCTGGTATC [8059]  
Asp TC--AAACTTGTAGCTAGCAGTGCAATAATGAAAGGGCGTCGGTCTGCC--GCTGGTATC [7716]  
Ami -----GCTGGTATC [8305]  
Asi -----GCTGGTATC [8107]  
Tgu GTC-ACGGTCGCAGCGAGCAGTGCAATAATGAAAGGGCGTCAGTGCGCC--GCTGGTATC [6533]  
Cli GTC-ACGGTCGCAGCGAGCAGTGCAATAATGAAAGGGCGTCAGTGCGCC--GCTGGTATC [8233]  
Gga GTC-ACGGTCGCAGCGAGCAGTGCAATAATGAAAGGGCGTCAGTGCGCC--GCTGGTATC [7485]  
Xtr GTG-GCAGTGAATAA-AGCAGTGCAATGATGAAAGGGCATCAGTCTGCA--GCTTGTGTG [8163]  
Lch GTG--GAACCTCT--AGCAGTGCAATAATGAAAGGGCGTCAGTCTGCC--GCTGGTGTC [8757]  
Dre GTGGGAGCTGCAGCAAAGCAGTGCAATAATGAAAGGGCATCAGTCCACT--GCTAAGGTC [8061]

Hsa AGGTGCTCTGACGAGGTTGCACTACTGTGCTCTGAGA----AGCAGTGCAATGATATTGT [8606]  
Mmu GGGTGCTCTGACTAGGTTGCACTACTGTGCTGTGAGA----AGCAGTGCAATGGTATTGT [8528]  
Mdo ----- [7989]  
Meu ----- [6855]  
Oan GGCGGCTCTGACGATATTGCAC-ATAGTGTGCGCTCAGGGAAGCAGTGCAATAGTATTGT [7285]  
Aca GATGGCTCTGACAGTGTTGCACTACTGTCTACACAAATTA-AGCAGTGCAATAATATTGT [8314]  
Pbi GCTGGCTCTGACAATGTTGCACTACTGTCTTTCACAAATTT-AGCAGTGCAATAATATTGT [8704]  
Cpi GCTGGCTCTGACAATGTTGCACTACTGTCTGCACAAATAA-AGCAGTGCAATAATATTGT [9049]  
Cmy GCTGGCTCTGACAATGTTGCACTACTGTCTGCACAAATAA-AGCAGTGCAATAATATTGT [8717]  
Psi GCTGGCTCTGACAATGTTGCACTACTGTCTGCACAAATAA-AGCAGTGCAATAATATTGT [8118]  
Asp GCTGGCTCTGACAATGTTGCACTACTGTCTGCACAAATAA-AGCAGTGCAATAATATTGT [7775]  
Ami GCTGGCTCTGACAATGTTGCACTACTGTCTGCACAAATAA-AGCAGTGCAATAATATTGT [8364]  
Asi GCTGGCTCTGACAATGTTGCACTACTGTCTGCACAAATAA-AGCAGTGCAATAATATTGT [8166]  
Tgu GCTGGCTCTGACAATGTTGCACTACTGTCTGCACAAATAA-AGCAGTGCAATAATATTGT [6592]  
Cli GCTGGCTCTGACAATGTTGCACTACTGTCTGCACAAATAA-AGCAGTGCAATAATATTGT [8292]  
Gga GCTGGCTCTGACAATGTTGCACTACTGTCTGCACAAATAA-AGCAGTGCAATAATATTGT [7544]  
Xtr AATTGCTCTGACAGTGTTGCACTACTGTGATCTCAAATGA-AGCAGTGCAATAGTATTGT [8222]  
Lch AGCTGCTCTGACAGTGTTGCACTACTGTATACACAAGTTA-AGCAGTGCAATAGTATTGT [8816]  
Dre TGTTGCTTTGACGATGTTGCACTACTGAACCATCTAATCA-AGCAGTGCAATAGTATTGT [8120]

Hsa CAAAGCATCTGGGACCAGC----- [8625]  
Mmu CAAAGCATCTGGGACCAGC----- [8547]  
Mdo ----- [7989]  
Meu ----- [6855]  
Oan CAAAGCATC-GAATCCACC----- [7303]  
Aca CAAAGCATTTGGTTCCAGT--GTTGCTGTCCGGAGCCCTTTTTCTGTTGTAATACTACTGGCA [8372]  
Pbi CAAAGCATTTGGTTCTAGT--CTTGTGCGTCCGTGTCCTTTTTCTGTTGTAATACTACTGGGA [8762]  
Cpi CAAAGCATTTGGTTCCAGT--ACTGTTGTCCAGAGCCCTTTTTCTGTTGTAATACTACTGGCA [9107]  
Cmy CAAAGCATTTGGTTCCAGT--ACTGTTGTCCAGAGCCCTTTTTCTGTTGTAATACTACTGGCA [8775]  
Psi CAAAGCATTTGGTTCCAGT--ACTGTTGTCCAGAGCCCTTTTTCTGTTGTAATACTACTGGCA [8176]  
Asp CAAAGCATTTGGTTCCAGT--ACTGTTGTCCAGAGCCCTTTTTCTGTTGTAATACTACTGGCA [7833]  
Ami CAAAGCATTTGGTTCCAGT--GCTGTTGTCCAGAGCCCTTTTTCTGTTGTAATACTACTGGCA [8422]  
Asi CAAAGCATTTGGTTCCAGT--GCTGTTGTCCAGAGCCCTTTTTCTGTTGTAATACTACTGGCA [8224]  
Tgu CAAAGCATTTGGTTCCAGT--GCTGTTGTCCAGAGCCCTTTTTCTGTTGTAATACTACTGGCA [6650]  
Cli CAAAGCATTTGGTTCCAGT--GCTGTTGTCCAGAGCCCTTTTTCTGTTGTAATACTACTGGCA [8350]  
Gga CAAAGCATTTGGTTCCAGT--GCTGTTGTCCAGAGCCCTTTTTCTGTTGTAATACTACTGGCA [7602]

Xtr CAAAGCATTTTCATTCCAGC--CCTGTTATCCGTGGCCCTTTTTCTGTTGTACTACTGGAA [8280]  
Lch CAAAGCATCTGGGCCAGT--ACTGTTGGCCAGGGCCCTTTTTCTGTTGTACTACTGGAA [8874]  
Dre CATTGCATTTCGGCTTTTCGC--TGTTTTGTCCATTGCCCTTTTTCTGTTGTACTACTGGCC [8178]

Hsa ----- [8625]  
Mmu ----- [8547]  
Mdo -----TTGTCTAGTGCCCT [8003]  
Meu ----- [6855]  
Oan -----CTGTCTAGTGCCCT [7317]  
Aca AGTATGAGTAGCAGTGCAATATTTAAAAGGGCATTGGCTGGCAGG--CTGTCCACTGCCCT [8430]  
Pbi GCTCTCATTAGCAGTGCAATATTTAAAAGGGCATTGGCTGGCAGA--CTGTCCACTGCCCT [8820]  
Cpi ATTATGATGAGCAGTGCAATATTTAAAAGGGCATTGGCTGGCAGA--CTGTCCAGTGCCCT [9165]  
Cmy ATTATGATGAGCAGTGCAATATTTAAAAGGGCATTGGCTGGCAGA--CTGTCCAGTGCCCT [8833]  
Psi ATTATGATGAGCAGTGCAATATTTAAAAGGGCATTGGCTGGCAGA--CTGTCCAGTGCCCT [8234]  
Asp ATTATGATGAGCAGTGCAATATTTAAAAGGGCATTGGCTGGCAGA--CTGTCCAGTGCCCT [7891]  
Ami ATTATGATGAGCAGTGCAATATTTAAAAGGGCATTGGCTGGCAGA--CTGTCCAGTGCCCT [8480]  
Asi ATTATGATGAGCAGTGCAATATTTAAAAGGGCATTGGCTGGCAGA--CTGTCCAGTGCCCT [8282]  
Tgu ATTATGATGAGCAGTGCAATATTTAAAAGGGCATTGGCTGGCAGA--CTGTCCAGTGCCCT [6708]  
Cli ATTATGATGAGCAGTGCAATATTTAAAAGGGCATTGGCTGGCAGA--CTGTCCAGTGCCCT [8408]  
Gga ATTATGATGAGCAGTGCAATATTTAAAAGGGCATTGGCTGGCAGA--CTGTCCAGCGCCCT [7660]  
Xtr TTTGTAATTAGCAGTGCAATATTTAAAAGGGCATTGGCTGACAGA--CTGTCCAGTGCCCT [8338]  
Lch ATTAAGATGAGCAGTGCAATATTTAAAAGGGCATTGGCTGGCAGA--CTGTCCAGCGCCCT [8932]  
Dre AATCAGAAGAGCAGTGCAATATTTAAAAGGGCATTGGCTGATAGA--CTGTCCAGTGCCCT [8236]

Hsa ----- [8625]  
Mmu ----- [8547]  
Mdo TTTTATGTTGTACTACTAGTGATCCTGCACAAGAA--GCAGTGCAATGTTAAAAGGGCAT [8061]  
Meu ----- [6855]  
Oan TTTTATGTTGTACTACTAGTGATCCTGCACAAAAA--GCAGTGCAATGTTAAAAGGGCAT [7375]  
Aca TTTTATGTTGTACTACTAGTGAACATGCGCAAAAAA--GCAGTGCAATGTTAAAAGGGCAT [8488]  
Pbi TTTTATGTTGTACTACTAGTGAACACACACAAAAA--GCAGTGCAATGTTAAAAGGGCAT [8878]  
Cpi TTTTATGTTGTACTACTAGTGATCATAACACAAAAA--GCAGTGCAATGTTAAAAGGGCAT [9223]  
Cmy TTTTATGTTGTACTACTAGTGATCATGCACAAAAA--GCAGTGCAATGTTAAAAGGGCAT [8891]  
Psi TTTTATGTTGTACTACTAGTGATCATGCACAAAAA--GCAGTGCAATGTTAAAAGGGCAT [8292]  
Asp TTTTATGTTGTACTACTAGTGATCATGCACAAAAA--GCAGTGCAATGTTAAAAGGGCAT [7949]  
Ami TTTTATGTTGTACTACTAGTGATCGTGCACAAAAA--GCAGTGCAATGTTAAAAGGGCAT [8538]  
Asi TTTTATGTTGTACTACTAGTGATCGTGCACAAAAA--GCAGTGCAATGTTAAAAGGGCAT [8340]  
Tgu TTTTATGTTGTACTACTGGTGATGATGCACAAAAA--GCAGTGCAATGTTAAAAGGGCAT [6766]  
Cli TTTTATGTTGTACTACTGGTGATCATGCACAAAAA--GCAGTGCAATGTTAAAAGGGCAT [8466]  
Gga TTTTATGTTGTACTACTAGTGATCATAACAAA---GCAGTGCAATGTTAAAAGGGCAT [7716]  
Xtr TTTTATGTTGTACTACTAGTGGTGCACACACAAAAAAGCAGTGCAATGTTAAAAGGGCAT [8398]  
Lch TTTTATGTTGTACTACTGGTGACAATAATAAAAA--GCAGTGCAATGTTAAAAGGGCAT [8990]  
Dre TTTTATATTGTACTACTGATAACCCAGTTATTTAAA--GCAGTGCAATGTTAAAAGGGCAT [8294]

Hsa -----CTGCTAACGAATGCTCTGACTTTTATTGCACTACTGTACTTTACAGCTAG [8674]  
Mmu -----CTGCTAACGGCTGCTCTGACTTTTATTGCACTACTGTACTTTACAGCGAG [8596]  
Mdo TGGCCAGTG--CTGCTAACGAATGCTCTGACTTTTATTGCACTACTGTACTTTACAGCTAG [8119]  
Meu ----- [6855]  
Oan TGGCCAGTG--CTGCTAACGAATGCTCTGACTTTTATTGCACTACTGTTCTTTACAGCTAG [7433]  
Aca TGGCCAGCA--CTGCGGACAAGGGCTCTGACTTCATTGCACTACTGTACTTTCCCAACTAG [8546]  
Pbi TGGCCAGCA--CTGCTGACAAGTCTCTGACTTCATTGCACTACTGTACTTTCCAGCTAG [8936]  
Cpi TGGCCAGTG--CTGCTAACGAATGCTCTGACTTTTATTGCACTACTGTACTTTACAGCTAG [9281]  
Cmy TGGCCAGTG--CTGCTAACGAATGCTCTGACTTTTATTGCACTACTGTACTTTACAGCTAG [8949]  
Psi TGGCCAGTG--CTGCTAACGAATGCTCTGACTTTTATTGCACTACTGTACTTTACAGCTAG [8350]  
Asp TGGCCAGTG--CTGCTAACGAATGCTCTGACTTTTATTGCACTACTGTACTTTACAGCTAG [8007]  
Ami TGGCCAGCA--CTGCTAACGAATGCTCTGACTTTTATTGCACTACTGTACTTTACAGCTAG [8596]  
Asi TGGCCAGCA--CTGCTAACGAATGCTCTGACTTTTATTGCACTACTGTACTTTACAGCTAG [8398]



Tgu TGGCCAGCA--CTGCTAACGAGTGTCTGACTTTTATTGCACTACTGTACTATAACAGAGAG [ 6824 ]  
Cli TGGCCAGCA--CTGCTAACGAACGCTCTGACTTTTATTGCACTACTGTACTTCCCAGCTAG [ 8524 ]  
Gga TGGCCAGCA--CTGCTAACGAATGTCTGACTTTTATTGCACTACTGTACTTCACAGCTAG [ 7774 ]  
Xtr TGGCCAGGG--CTGCTAATGTGTGCTCTGACTTTTATTGCACTACTGTACTATAACAGCTAG [ 8456 ]  
Lch TGGCCAGTT--CTGCTGATGGGTGTCTGACTTTTATTGCACTACTGTGGTTTACATCAAG [ 9048 ]  
Dre TGGCCAGGG--CTGTTAACAGGTGTCTGACTTCATTGCACTACTGTATTGGACAGCTAG [ 8352 ]

Hsa CAGTGCAATAGTATTGTCAAAGCATCTGAAAGCAG--CGTCTCCAGGGCAACCGTGGCTTT [ 8732 ]  
Mmu CAGTGCAATAGTATTGTCAAAGCATCCGCGAGCAG--CGTCTCCAGGGCAACCGTGGCTTT [ 8654 ]  
Mdo CAGTGCAATAGTATTGTCAAAGCATCTGAAAGCAG--CGTCTCCAGGGCAACCGTGGCTTT [ 8177 ]  
Meu -----CGTCTCCAGGGCAACCGTGGCTTT [ 6878 ]  
Oan CAGTGCAATAGTATTGTCAAAGCATCTGAAAGCAG----- [ 7468 ]  
Aca CAGTGCAATAGTATTGTCAAAGCACTTGCAAGCAG--CGTCTCCAGGGCAACCGTGGCTTT [ 8604 ]  
Pbi CAGTGCAATAGTATTGTCAAAGCACTTGCGAGCAG--CGTCTCCAGGGCAACCGTGGCTTT [ 8994 ]  
Cpi CAGTGCAATAGTATTGTCAAAGCATCTGAAAGCAG--TGTCTCCAGGGCAACCGTGGCTTT [ 9339 ]  
Cmy CAGTGCAATAGTATTGTCAAAGCATCTGAAAGCAG--TGTCTCCAGGGCAACCGTGGCTTT [ 9007 ]  
Psi CAGTGCAATAGTATTGTCAAAGCATCTGAAAGCAG--TGTCTCCAGGGCAACCGTGGCTTT [ 8408 ]  
Asp CAGTGCAATAGTATTGTCAAAGCATCTGAAAGCAG--TGTCTCCAGGGCAACCGTGGCTTT [ 8065 ]  
Ami CAGTGCAATAGTATTGTCAAAGCATCTGAAAGCAG--CGTCGCCAGGGCAACCGTGGCTTT [ 8654 ]  
Asi CAGTGCAATAGTATTGTCAAAGCATCTGAAAGCAG----- [ 8433 ]  
Tgu CAGTGCAATAGTATTGTCAAAGCATCTGAGAGCAG----- [ 6859 ]  
Cli CAGTGCAATAGTATTGTCAAAGCATCCGAAAGCAG--CGCCGCCCGGGCGACCGTGGCTTT [ 8582 ]  
Gga CAGTGCAATAGTATTGTCAAAGCATCTGAAAGCAG----- [ 7809 ]  
Xtr CAGTGCAATAGTATTGTCAAAGCATCTGCAAGCAG--TGTCTCCAGGGCAACCGTGGCTTT [ 8514 ]  
Lch CAGTGCAATAGTATTGTCAAAGCATCTAAAAGCAG--GGTCTCCGAGGCAACCGTGGCTTT [ 9106 ]  
Dre CAGTGCAATAGTATTGTCAAAGCGTCTGAGAGCAG--TGTCTCCATGGCGACCGTGGCAT [ 8410 ]

Hsa TCGATTGTTACTGTG--GGAACCTGGA---GGTAACAGTCTACAGCCATGGTCGCC---CC [ 8784 ]  
Mmu TCGATTGTTACTGTG--GGAACCGGA---GGTAACAGTCTACAGCCATGGTCGCC---CC [ 8706 ]  
Mdo TCGATTGTTACTGTG--GGAACCAGG---GGTAACAGTCTACAGCCATGGTCGCC---CC [ 8229 ]  
Meu TCGATTGTTACTGTG--GGAACCGGG---GGTAACAGTCTACAGCCATGGTCGCC---CC [ 6930 ]  
Oan ----- [ 7468 ]  
Aca TAGATTGTTACTGTGCGGACGTGGGTTT--GGTAACAGTCTACAGCCATGGTTGGT---CC [ 8660 ]  
Pbi TAGATTGTTACTGTGTGGATGTGGGCT--GGTAACAGTCTACAGCCATGGTTGCCT--GG [ 9050 ]  
Cpi TAGATTGTTACTGTG--GTTGTGTGTT--GGTAACAGTCTACAGCCATGGTCGCTT--GG [ 9393 ]  
Cmy TAGATTGTTACTGTG--GTTGTGTGTC--GGTAACAGTCTACAGCCATGGTCGCTT--GG [ 9061 ]  
Psi TAGATTGTTACTGTG---TCTTGTGTT--GGTAACAGTCTACAGCCATGGTCGCTT--GG [ 8461 ]  
Asp TAGATTGTTACTGTG---GCTTGTGTT--GGTAACAGTCTACAGCCATGGTCGCTT--GG [ 8118 ]  
Ami TAGATTGTTACTGTG---TGGTGCCTG--GGTAACAGTCTACAGCCATGGTCGCT--GG [ 8706 ]  
Asi ----- [ 8433 ]  
Tgu ----- [ 6859 ]  
Cli TAGATTGTTACTGTG--CCGCTGGGGG--GGTAACAGTCTACAGCCATGGTCGCC---GG [ 8635 ]  
Gga ----- [ 7809 ]  
Xtr TAGATTGTTACTGTGTA--GTTCTGCATT--GGTAACAGTCTACAGCCATGGTCGCTC--GG [ 8568 ]  
Lch TAGATTGTTACTGTGTA--TGATGCAGT--GGTAACAGTCTACAGCCATGGTCGTTTC--GG [ 9160 ]  
Dre TAGATTGTTACTGTAGGAACAGAATTTTTGGTAACAGTCTACAGCCATGGTCGCTAGTGG [ 8470 ]

Hsa GCAGCAGC--ACAGCGCGCCGGCACCTTGGCTCTAGACTGCTTACTGC-----CCGGGCC [ 8837 ]  
Mmu GCAGCAGC--GCAGCGCGCCGGCACCTTGGCTCTAGACTGCTTACTGC-----CCGGGCC [ 8759 ]  
Mdo GCAGCAGC--GCAGCGCGCCGGCACCTTGGCTCTAGACTGCTTACTGC-----CCGGGCC [ 8282 ]  
Meu GCAGCAGC--GCAGCGCGCCGGCACCTTGGCTCTAGACTGCTTACTGC-----CCGGGCC [ 6983 ]  
Oan ----- [ 7468 ]  
Aca GCGCGACG--CCAGCGTGCCGGGACCTTGGCTCTAGACTGCTTACTGCGAAATCCAAGGG [ 8718 ]  
Pbi AGTGGACG--TCAGTTCGTGCGGGACCTTGGCTCTAGACTGCTTACTGCTACAGGCAATGA [ 9108 ]  
Cpi GCTAGACA--TCAGCGCGTTCGGCACCTTGGCTCTAGACTGATTACTGCTAAGTAGCATTA [ 9451 ]  
Cmy GCCAGACG--TCAGCGCGTTCGGCACCTTGGCTCTAGACTGATTACTGCTAAAATAGCGTTC [ 9119 ]  
Psi GCCAGACG--TCAGCGCGTTCGGCACCTTGGCTCTAGACTGCTTACTGCTACGTAGCGTGA [ 8519 ]

Asp GCCAGACG----- [ 8126 ]  
Ami GCCGGACG--TCAGCGCGTCGGCACCTTGGCTCTAGACTGCTTACTGCTGAGCACGGCGA [ 8764 ]  
Asi ----- [ 8433 ]  
Tgu ----- [ 6859 ]  
Cli GACAGGCG--TCAGAGCGTCGGCACCTTGGCTCTAGACTGCTTACTGCTGCGTAGGG--A [ 8691 ]  
Gga ----- [ 7809 ]  
Xtr GCAAGATG--TCATTGCATCGGCACCTTGGCTCTAGACTGCTTACTGTGAAACTGTGCTA [ 8626 ]  
Lch GTAAGACG--TCAGAGCGTCAACACCTTGGCTCTAGACTGCTTACTGCTAAATGTTGTGA [ 9218 ]  
Dre GCAGAAAC--TCAGAACTTCATGACCTTGGCTCTAGACTGCTTACTGCTTATGGAGTCCG [ 8528 ]

Hsa GCCCT-CAGTAACAGTCTCCAGTACACGGCCACCGACGCCTGGCCC--AATGCTTTGCTAG [ 8894 ]  
Mmu GCCTT-CAGTAACAGTCTCCAGTACACGGCCACCGACGCCTGGCCC--AATGCTTTGCTGA [ 8816 ]  
Mdo ACCCT-CAGTAACAGTCTCCAGTACACGGCCACCGACGCCTGGCCC--AATGCTTTGCTAA [ 8339 ]  
Meu ACCCT-CAGTAACAGTCTCCAGTACACGGCCACCGACGCCTGGCCC--AATGCTTTGCTAA [ 7040 ]  
Oan -----AATGCTTTGCTAA [ 7481 ]  
Aca GCGAAACAGTAACAGTCCACAGTCATGGCTACTGACGGCTGGCGG--AATGCTTTGCTAA [ 8776 ]  
Pbi GAGACACAGTAACAGTCTACAGTCATGGCTACTGAAGTCTGGCAG--AATGCTTTGCTAA [ 9166 ]  
Cpi AAGAAACAGTAACAGTCTACAGTCATGGCTACTGAAGCATGACAG--AATGCTTTGCTAA [ 9509 ]  
Cmy AGGAAACAGTAACAGTCTACAGTCATGGCTACTGAAGCATGACAG--AATGCTTTGCTAA [ 9177 ]  
Psi GAGACACAGTAACAGTCTACAGTCATGGCTACTGAAGCATGACAG--AATGCTTTGCTAA [ 8577 ]  
Asp -----AATGCTTTGCTAA [ 8139 ]  
Ami CCGGAACAGTAACAGTCTACAGTCATGGCTACTGAAGCATGACAG--AATGCTTTGCTAA [ 8822 ]  
Asi -----AATGCTTTGCTAA [ 8446 ]  
Tgu -----AATGCTTTGCTAA [ 6872 ]  
Cli CAGGA-CAGTAACAGTCTACAGTCATGGCTACTGAAGCATGACCC--AATGCTTTGCTAA [ 8748 ]  
Gga -----AATGCTTTGCTAA [ 7822 ]  
Xtr TAGGAACAGTAACAGTCTACAGTCATGGCTACTGACGTATGACTG--AATGCTTTGCTAA [ 8684 ]  
Lch AAGATACAGTAACAGTCTACAGTCATGGCTACTGAAGCATGACAA--AATGCTTTGCTAA [ 9276 ]  
Dre ACAGTACAGTAACAGTCTACAGTCATGGCTACTGAAGTCTGGCTC--AATGCTTTGCTAA [ 8586 ]

Hsa AGCTGGTAAAAATGGAACCAAATCGACTGTCCAATGGATTTGGTCCCCTTCAACCAGCTGT [ 8954 ]  
Mmu AGCTGGTAAAAATGGAACCAAATCAGCTGTTGGATGGATTTGGTCCCCTTCAACCAGCTGT [ 8876 ]  
Mdo AGCTGGTAAAAAGGAACCAAATCACCTGTGCGATGGATTTGGTCCCCTTCAACCAGCTGT [ 8399 ]  
Meu AGCTGGTAAAAAGGAACCAAATCACCTGTGCGATGGATTTGGTCCCCTTCAACCAGCTGT [ 7100 ]  
Oan AGCTGGTAAAAATGGAACCAAATCAACTGTTCAATGGATTTGGTCCCCTTCAACCAGCTGT [ 7541 ]  
Aca AGCTGGTAAAAATGGAACCAAATCAACTGTTCAATGGATTTGGTCCCCTTCAACCAGCTGT [ 8836 ]  
Pbi AGCTGGTAAAAATGGAACCAAATCAACTGTTCAATGGATTTGGTCCCCTTCAACCAGCTGT [ 9226 ]  
Cpi AGCTGGTAAAAATGGAACCAAATCAACTGTTCAATGGATTTGGTCCCCTTCAACCAGCTGT [ 9569 ]  
Cmy AGCTGGTAAAAATGGAACCAAATCAACTGTTCAATGGATTTGGTCCCCTTCAACCAGCTGT [ 9237 ]  
Psi AGCTGGTAAAAATGGAACCAAATCAACTGTTCAATGGATTTGGTCCCCTTCAACCAGCTGT [ 8637 ]  
Asp AGCTGGTAAAAATGGAACCAAATCAACTGTTCAATGGATTTGGTCCCCTTCAACCAGCTGT [ 8199 ]  
Ami AGCTGGTAAAAATGGAACCAAATCAACTGTTCAATGGATTTGGTCCCCTTCAACCAGCTGT [ 8882 ]  
Asi AGCTGGTAAAAATGGAACCAAATCAACTGTTCAATGGATTTGGTCCCCTTCAACCAGCTGT [ 8506 ]  
Tgu AGCTGGTAAAAATGGAACCAAATCAACTGTTCAATGGATTTGGTCCCCTTCAACCAGCTGT [ 6932 ]  
Cli AGCTGGTAAAAATGGAACCAAATCAACTGTTCAATGGATTTGGTCCCCTTCAACCAGCTGT [ 8808 ]  
Gga AGCTGGTAAAAATGGAACCAAATCAACTGTTCAATGGATTTGGTCCCCTTCAACCAGCTGT [ 7882 ]  
Xtr AGCTGGTAAAAATGGAACCAAATCAACTGTTGAATGGATTTGGTCCCCTTCAACCAGCTGC [ 8744 ]  
Lch AGCTGGTAAAAATGGAACCAAATCAACTGTTCTATGGATTTGGTCCCCTTCAACCAGCTGT [ 9336 ]  
Dre AGCTGGTAAAAATGGAACCAAATCAACTGTTTATGGATTTGGTCCCCTTCAACCAGCTGT [ 8646 ]

Hsa AGCTGTGCATTG--AATGCTTTGCTAGAGCTGGTAAAAATGGAACCAAATCGCCTCTTCAA [ 9012 ]  
Mmu AGCTGCGCATTG--AATGCTTTGCTAAAGCTGGTAAAAATGGAACCAAATCGCCTCTTCAA [ 8934 ]  
Mdo AGCTGTGCATTA--AATGCTTTGCTAAAGCTGGTAAAAATGGAACCAAATCACCTATTCAA [ 8457 ]  
Meu AGCTGTGCATTA--AATGCTTTGCTAAAGCTGGTAAAAATGGAACCAAATCACCTATTCAA [ 7158 ]  
Oan AGCTGCGCATTG--AATGCTTTGCTAAAGCTGGTAAAAATGGAACCAAATCACCTCTTCAA [ 7599 ]  
Aca AGCTGTGCATTG--GATGCTTTGCTAAAGCTGGTAAAAATGGAACCAAATCACCTGTTAAA [ 8894 ]  
Pbi AGCTGTGCATTG--AATGCTTTGCTTAAAGCTGGTAAAAATGGAATCAAATCACATGTTTAA [ 9284 ]

Cpi AGCTGTGCATTG--AATGCTTTGCTAAAGCTGGTAAAATGGAACCAAATCACCTCTTCAA [9627]  
Cmy AGCTGTGCATTG--AATGCTTTGCTAAAGCTGGTAAAATGGAACCAAATCACCTCTTCAA [9295]  
Psi AGCTGTGCATTG--AATGCTTTGCTAAAGCTGGTAAAATGGAACCAAATCACCTCTTCAA [8695]  
Asp AGCTGTGCATTG--AATGCTTTGCTAAAGCTGGTAAAATGGAACCAAATCACCTCTTCAA [8257]  
Ami AGCTGTGCATTG--AATGCTTTGCTAAAGCTGGTAAAATGGAACCAAATCACCTGTTCAA [8940]  
Asi AGCTGTGCATTG--AATGCTTTGCTAAAGCTGGTAAAATGGAACCAAATCACCTGTTCAA [8564]  
Tgu AGCTGTGCATTG--AATGCTTTGCTAAAGCTGGTAAAATGGAACCAAATCACCTCTTCAA [6990]  
Cli AGCTGTGCATTG--AATGCTTTGCTAAAGCTGGTAAAATGGAACCAAATCACCTCTTCAA [8866]  
Gga AGCTGTGCATTG--AATGCTTTGCTAAAGCTGGTAAAATGGAACCAAATCACCTCTTCAA [7940]  
Xtr AGCTGTGCATTG--AATGCTTTGCTAAAGCTGGTAAAATGGAACCAAATCACCTCTTCAA [8802]  
Lch AGCTGTGCATTG--AATGCTTTGCTAAAGCTGGTAAAATGGAACCAAATCACCTCTTCAA [9394]  
Dre AGCTGTGCATTG--AATGCTTTGCTAAAGCTGGTAAAATGGAACCAAATCACCTCTTCAA [8704]

Hsa TGGATTTGGTCCCCTTCAACCAGCTGTAGCTATGCATTG--TGCCCCCTGCTCTGGCTGG [9070]  
Mmu TGGATTTGGTCCCCTTCAACCAGCTGTAGCTATGCATTG--GGCCCCCTGCTCTGGCTGG [8992]  
Mdo TGGATTTGGTCCCCTTCAACCAGCTGTAGCTATGCATTG--TGCACCTTGTCTGGCTGG [8515]  
Meu TGGATTTGGTCCCCTTCAACCAGCTGTAGCTATGCATTG----- [7197]  
Oan TGGATTTGGTCCCCTTCAACCAGCTGTAGCTATGCATTG--TGAACCCTGCTCTGGCTGG [7657]  
Aca TGGATTTGGTCCCCTTCAACCAGCTGTAGCTATGTATTG--TGAGTCCTGCTCTGGCTGG [8952]  
Pbi TGGATTTGGTCCCCTTCAACCAGCTGTAGCTATGTATTG--AGAGCATTGCTCTGGCTGG [9342]  
Cpi TGGATTTGGTCCCCTTCAACCAGCTGTAGCTATGCATTG--TGCACCCTGCTCTGGCTGG [9685]  
Cmy TGGATTTGGTCCCCTTCAACCAGCTGTAGCTATGCATTG--TGCACCCTGCTCTGGCTGG [9353]  
Psi TGGATTTGGTCCCCTTCAACCAGCTGTAGCTATGCATTG--TGCACCCTGCTCTGGCTGG [8753]  
Asp TGGATTTGGTCCCCTTCAACCAGCTGTAGCTATGCATTG--TGCACCCTGCTCTGGCTGG [8315]  
Ami TGGATTTGGTCCCCTTCAACCAGCTGTAGCTATGCATTG--TGCACTCTGCTGTGGCTGG [8998]  
Asi TGGATTTGGTCCCCTTCAACCAGCTGTAGCTATGCATTG--TGCACTCTGCTGTGGCTGG [8622]  
Tgu TGGATTTGGTCCCCTTCAACCAGCTGTAGCTATGCATTG--TATGCTCTGCTCTGGCTGG [7048]  
Cli TGGATTTGGTCCCCTTCAACCAGCTGTAGCTATGCATTG--TATGCTCTGCTCTGGCTGG [8924]  
Gga TGGATTTGGTCCCCTTCAACCAGCTGTAGCTATGCATTG--TATGCTCTGCTCTGGCTGG [7998]  
Xtr TGGATTTGGTCCCCTTCAACCAGCTGTAGGATTGCATTG--TACAGGCTGCTATGGCTGG [8860]  
Lch TGGATTTGGTCCCCTTCAACCAGCTGTAGCTATGCATTG----- [9433]  
Dre TGGATTTGGTCCCCTTCAACCAGCTGTAGCTATGCTTTG--CACGCCTTGTCTGTGGCTGG [8762]

Hsa TCAAACGGAACCAAGTCCG-TCTTCCTGAGAGGTTTGGTCCCCTTCAACCAGCTACAGCA [9129]  
Mmu TCAAACGGAACCAAGTCCG-TCTTCCTGAGAGGTTTGGTCCCCTTCAACCAGCTACAGCA [9051]  
Mdo TCAAACGGAACCAAGTCCG-TCTGACTGAGAGGTTTGGTCCCCTTCAACCAGCTACAGCA [8574]  
Meu ----- [7197]  
Oan TCAAACGGAACCAAGTCCG-TCTGCCTGAGAGGTTTGGTCCCCTTCAACCAGCTACAGCG [7716]  
Aca TCAAAGGGAACCAAGGCTG-TCTTCCTTGAAGGTTTGGTCCCCTTCAACCAGCTACAGCA [9011]  
Pbi TCAAAAAGGAACCAAGGCCG-TCTTTCCTGGAGGTTTGGTCCCCTTCAACCAGCTATAGCA [9401]  
Cpi TCAAACGGAACCAAGTCCG-TCTTCCTTGGAGGTTTGGTCCCCTTCAACCAGCTACAGCA [9744]  
Cmy TCAAACGGAACCAAGTCCG-TCTTCCTTGGAGGTTTGGTCCCCTTCAACCAGCTACAGCA [9412]  
Psi TCAAACGGAACCAAGTCCG-TCTTCCTTGAAGGTTTGGTCCCCTTCAACCAGCTACAGCA [8812]  
Asp TCAAACGGAACCAAGTCCG-TCTTCCTTGGAGGTTTGGTCCCCTTCAACCAGCTACAGCA [8374]  
Ami TCAAACGGAACCAAGTCCG-TCTTCCTTGGAGGTTTGGTCCCCTTCAACCAGCTATAGCA [9057]  
Asi TCAAACGGAACCAAGTCCG-TCTTCCTTGGAGGTTTGGTCCCCTTCAACCAGCTATAGCA [8681]  
Tgu TCAAACGGAACCAAGCCCG-TCTTCCTCGGAGGTTTGGTCCCCTTCAACCAGCTATAGCA [7107]  
Cli TCAAACGGAACCAAGCCCA-TCTTCCTCGGAGGTTTGGTCCCCTTCAACCAGCTATAGCA [8983]  
Gga TCAAACGGAACCAAGCCCG-TCTTCCTCGGAGGTTTGGTCCCCTTCAACCAGCTATAGCA [8057]  
Xtr TCAAACGGAACCAAGTCCG-TCTTCCTTAGAGGTTTGGTCCCCTTCAACCAGCTATTGCA [8919]  
Lch ----- [9433]  
Dre TCAAATGGAACCAAGTCAAGGTGTTTCTGCGAGGTTTGGTCCCCTTCAACCAGCTACTGCG [8822]

Hsa GGGCTGG----- [9136]  
Mmu GGGCTGG----- [9058]  
Mdo GGGCTGA----- [8581]  
Meu ----- [7197]

Oan GGGCCGA--GGCCAGCTGCTGGGGCTGGTCAAAAAGGAACCAGATCGCCTC--TCCACCTGA [ 7773 ]  
Aca GTCCTGA--TATGTGTCCCTAGGGCTGGTAAAAAGGAACCAGATCGACTG--GCAACTGGA [ 9068 ]  
Pbi GTGCTGA--CTTGTGCTCCTGGGGCTGGTAAAAAGGAACCAGATCGACTG--GCAACTG-A [ 9457 ]  
Cpi GTGCTGA--AGTGTGTCCCTGGGGCTGGTAAAAAGGAACCAGATCAACTT--GGAACTGGA [ 9801 ]  
Cmy GTGCTGA--AGTGTGTCCCTGGGGCTGGTAAAAAGGAACCAGATCAACTT--GGAACTGGA [ 9469 ]  
Psi GTGCTGA--AGTGCCTCCCTGGGGCTGGTAAAAAGGAACCAGATCAACCT--GGAAATGGA [ 8869 ]  
Asp GTGCTGA--AGTGCCTCCCTGGGGCTGGTAAAAAGGAACCAGATCAACCT--GGAAATGGA [ 8431 ]  
Ami GTGCTGA--AGTGTGTCCCTGGGGCTGGTAAAAAGGAACCAGATCAACTT--GGAACTGGA [ 9114 ]  
Asi GTGCTGA----- [ 8688 ]  
Tgu GTGTGGA----- [ 7114 ]  
Cli GTGTTGA--GGTGCCTCCCTGGGGCTGGTAAAAAGGAACCAGATCAACTT--GCAACTGGA [ 9040 ]  
Gga GTGTTGA--GGTGCCTCCCTGGGGCTGGTAAAAAGGAACCAGATCAACT--ACA ACTGGA [ 8113 ]  
Xtr G TACTGA--GCTGTCTGGTTGCGGCTGGTAAAAAGGAACCACATCAACCCAGAAAAAGGA [ 8977 ]  
Lch -----AATGCTTTGCTGAAGCTGGTAAAAAGGAACCAGATCAACTT--TCTATTGGA [ 9483 ]  
Dre TCGTGAA----- [ 8829 ]  
  
Hsa -----GGCCTCGCTGTTCTCTATGGCTT [ 9159 ]  
Mmu -----GGCCTCACTGTTCTCTATGGCTT [ 9081 ]  
Mdo ----- [ 8581 ]  
Meu ----- [ 7197 ]  
Oan TTTGGTCCCCTTCAACCGGCTGCAGCGGGTTGCCG--GGCCCCGCTGTGCTCTATGGCTT [ 7831 ]  
Aca TTTGGTCCCCTTCAACCAGCTGTGGTGGCAGCTGA--TGCCCCATTGTCTTCTATGGCTT [ 9126 ]  
Pbi TTTGGTCCCCTTCAACCAGCTGGGGGGGCACAAAC--TATCCCATTGTCTTCTATGGCTT [ 9515 ]  
Cpi TTTGGTCCCCTTCAACCAGCTGCAGTGGCGCATAAC--TGTCCCCTGTCTTCTATGGCTT [ 9859 ]  
Cmy TTTGGTCCCCTTCAACCAGCTGCAGTGGCGCATAAC--TGTCCCCTGTCTTCTATGGCTT [ 9527 ]  
Psi TTTGGTCCCCTTCAACCAGCTGCAGTGGCGCATAAC--GGTCCCATTGTCTTCTATGGCTT [ 8927 ]  
Asp TTTGGTCCCCTTCAACCAGCTGCAGTGGCGCATAAC--GGTCCCATTGTCTTCTATGGCTT [ 8489 ]  
Ami TTTGGTCCCCTTCAACCAGCTGTAGTGGCACAATAA--GGTCCCCTGTGTTATATGGCTT [ 9172 ]  
Asi -----GGTCCCCTGTGTTATATGGCTT [ 8711 ]  
Tgu -----CAGCCTGCCGCTTGTATGGCTT [ 7137 ]  
Cli TTTGGTCCCCTTCAACCAGCTGCAGCGGGCAGTGT--TGGCCTGCTGTCTTGTATGGCTT [ 9098 ]  
Gga TTTGGTCCCCTTCAACCAGCTGCAGTGGGGCACGA--CGCCTCACTGTCTTGTATGGCTT [ 8171 ]  
Xtr TTTGGTCCCCTTCAACCAGCCGCAACTGGTCAGGA----- [ 9012 ]  
Lch TTTGGTCCCCTTCAACCAGCTGTAGCTGTGCATTT--CTATCCATCATGCTGTATGGCTT [ 9541 ]  
Dre -----TTGCTCTTTGCCCGTATGGCTT [ 8852 ]  
  
Hsa TTTATTCCCTATGTGATTCTACTGCTCA--CTCATATAGGGATTGGAGCCGTGGCGCACGG [ 9217 ]  
Mmu TTTATTCCCTATGTGATTCTATTGCTCG--CTCATATAGGGATTGGAGCCGTGGCGTACGG [ 9139 ]  
Mdo ----- [ 8581 ]  
Meu ----- [ 7197 ]  
Oan TTTATTCCCTATGTGATCCTGCTGCTCA--CTCATATAGGGATTGGAGCCGTGCAACACGG [ 7889 ]  
Aca TTTATTCCCTATGTGATTATATCACTAA--TTTCATATAGGGATTGAAGCCATGTAATACGC [ 9185 ]  
Pbi TTTATTCCCTATGTGATTATATTGCTAA--TTTCATATAGGGATTGAAGCCATGCAATACAC [ 9574 ]  
Cpi TTTATTCCCTATGTGATTATACTGCTAA--TTTCATATAGGGATTGAAGCCGTGCAATACGC [ 9918 ]  
Cmy TTTATTCCCTATGTGATTATACTGCTCA--TTTCATATAGGGATTGAAGCCGTGCAATACGC [ 9586 ]  
Psi TTTATTCCCTATGTGATTATACTGCTCA--TTTCATATAGGGATTGAAGCCGTGCAATACGC [ 8986 ]  
Asp TTTATTCCCTATGTGATTATACTGCTCA--TTTCATATAGGGATTGAAGCCGTGCAATACGC [ 8548 ]  
Ami TTTATTCCCTATGTGATTATACTACTCC--TTTCATATAGGGATTGAAGCCGTGCAATACGC [ 9231 ]  
Asi TTTATTCCCTATGTGATTATACTACTCC--TTTCATATAGGGATTGAAGCCGTGCAATACGC [ 8770 ]  
Tgu TTTATTCCCTATGTGATTATACATCCCA--CTTCATATAGGGATTGAAGCCGTGCAGTACGC [ 7196 ]  
Cli TTTATTCCCTATGTGATTATACATCCCA--CTTCATATAGGGATTGAAGCCGTGCAATACAC [ 9157 ]  
Gga TTTATTCCCTATGTGATTATACATCCCG--CTTCATATAGGGATTGAAGCCGTGCAAGGCGC [ 8230 ]  
Xtr ----- [ 9012 ]  
Lch TTTATTCCCTATGTGATTGTGCTTGTGTATTTTCATATAGGGATTGAAGCCATGAAGTATGG [ 9601 ]  
Dre TTTATTCCCTATCTGAGAATTGCTCAGG--ACTCATATAGGGATTGAAGCCATGCAGGGCTG [ 8911 ]  
  
Hsa CGGGGA--TTCCTCTAGTGTCTTTATGGCTTTTTTATTCCCTATGTGATAGTAATAAAGTCT [ 9275 ]

Mmu TGAGGA--TTCACTCTAGTGCTTTATGGCTTTTTATTCCCTATGTGATCGTAATAAAGTCT [9197]  
Mdo -----TTCACTCTAGTGCTTTATGGCTTTTTATTCCCTATGTGATAGTAATAAAGTCT [8633]  
Meu -----TTCACTCTAGTGCTTTATGGCTTTTTATTCCCTATGTGATAGTAATAAAGTCT [7249]  
Oan AGGGGG--TTCACTCTAGTGTTTTATGGCTTTTTATTCCCTATGTGATAGTAATAAAGTCT [7947]  
Aca TGGGGA--TTCACTCTAGTGTTTTATGGCTTTTTATTCCCTATGTGATAGTAATAAAGTCT [9243]  
Pbi TGGGGA--TTCACTCTAGTGTTTTATGGCTTTTTATTCCCTATGTGATAGTAATAAAGTCT [9632]  
Cpi TGGGGC--TTCACTCTAGTGTTTTATGGCTTTTTATTCCCTATGTGATAGTAATAAAGTCT [9976]  
Cmy TGGGGC--TTCACTCTAGTGTTTTATGGCTTTTTATTCCCTATGTGATAGTAATAAAGTCT [9644]  
Psi TGGGGC--TTCACTCTAGTGTTTTATGGCTTTTTATTCCCTATGTGATAGTAATAAAGTCT [9044]  
Asp TGGGGC--TTCACTCTAGTGTTTTATGGCTTTTTATTCCCTATGTGATAGTAATAAAGTCT [8606]  
Ami TGGGGA--TTCACTCTAGTGTTTTATGGCTTTTTATTCCCTATGTGATAGTAATAAAGTCT [9289]  
Asi TGGGGA--TTCACTCTAGTGTTTTATGGCTTTTTATTCCCTATGTGATAGTAATAAAGTCT [8828]  
Tgu CGGGGT--TTCACTCTAGTGTTTTATGGCTTTTTATTCCCTATGTGATAGTAATAAAGTCT [7254]  
Cli TGGGGT--TTCACTCTAGTGTTTTATGGCTTTTTATTCCCTATGTGATAGTAATAAAGTCT [9215]  
Gga TGGGGT--TTCACTCTAGTGTTTTATGGCTTTTTATTCCCTATGTGATAGTAATAAAGTCT [8288]  
Xtr -----TTCACTGTGGTGTTTTATGGCTTTTTATTCCCTATGTGATAGTAATAAAGTCT [9064]  
Lch TGGGAG--TTCACTCCAGTGTTTTATGGCTTTTTATTCCCTATGTGATAGTAATAAAGTCT [9659]  
Dre GGGGAC--ACAGCTGTGCTGCTTTATGGCTTTTTATTCCCTATGTGAAGGTGAACAAGGCT [8969]

Hsa CATGTAGGGATGGAAGCCATGAAATACATTGTGAAAA--CACTCTGCTGTGGCCTATGGC [9333]  
Mmu CATGTAGGGATGGAAGCCATGAAATACATTGTGAAAA--CGCTCTGCTGTGGCCTATGGC [9255]  
Mdo CATGTAGGGATGGAAGCCATGAAATACATTGTGAAAT--CTCTCTGCTGTGGCCTATGGC [8691]  
Meu CATGTAGGGATGGAAGCCATGAAATACATTGTGAAAT--AACTCTGCTGTGGCTTATGGC [7307]  
Oan CATGTAGGGATGGAAGCCATGAAATACATTGTGAAAA--CTCTCTGCTGTGGCCTATGGC [8005]  
Aca CATGTAGGGATGGAAGCCATGAAATACATTGTGAAAA--CCCTCTGCTGTGGTCTATGGC [9301]  
Pbi CATGTAGGGATGGAAGCCATGAAATACATTGTGAAAA--TCCTCTGTTGTGGTCTATGGC [9690]  
Cpi CATGTAGGGATGGAAGCCATGAAATACATTGTGAAAA--CCCTCTGCTGTGGTCTATGGC [10034]  
Cmy CATGTAGGGATGGAAGCCATGAAATACATTGTGAAAA--CCCTCTGCTGTGGTCTATGGC [9702]  
Psi CATGTAGGGATGGAAGCCATGAAATACATTGTGAAAA--CCCTCTGCTGTGGTCTATGGC [9102]  
Asp CATGTAGGGATGGAAGCCATGAAATACATTGTGAAAA--CCCTCTGCTGTGGTCTATGGC [8664]  
Ami CATGTAGGGATGGAAGCCATGAAATACATTGTGAAAA--CCCTCTGCTGTGGTCTATGGC [9347]  
Asi CATGTAGGGATGGAAGCCATGAAATACATTGTGAAAA--CCCTCTGCTGTGGTCTATGGC [8886]  
Tgu CATGTAGGGATGGAAGCCATGAAATACATTGTGAAAA--CCCTCTGCTGTGGTTTTATGGC [7312]  
Cli CATGTAGGGATGGAAGCCATGAAATACATTGTGAAAA--CCCTCTGCTGTGGTTTTATGGC [9273]  
Gga CATGTAGGGATGGAAGCCATGAAATACATTGTGAAAA--CCCTCTGCTGTGGTCTATGGC [8346]  
Xtr CATGTAGGGATGGAAGCCATGAAATACATTGTGAAAA--CCCCCTGCTGAGGTATATGGC [9122]  
Lch CATGTAGGGATGGAAGCCATGAAATACATTGTGAAAA--ATCCCTGTTGTGTTCTATGGC [9717]  
Dre CATGTAGGGATACAAGCCACTAAACACGCAGTCAGAA--GTCACCTGCTGTGTTTTATGGC [9027]

Hsa TTTTTCATTCCCTATGTGATTGCTGTCCCAA--ACTCATGTAGGGCTAAAAGCCATGGG-CTA [9391]  
Mmu TTTTTCATTCCCTATGTGATTGCTGTCCGA--ACTCATGTAGGGCTAAAAGCCATGGG-CTA [9313]  
Mdo TTTTTCATTCCCTATGTGATTGCTGTTCCCA--ACTCATGTAGGGCTAAAAGCCATGGG-CTA [8749]  
Meu TTTTTCATTCCCTATGTGATTACTGTTCCCA--ACTCATGTAGGGCTAAAAGCCATGGG-CTA [7365]  
Oan TTTTTATTCCCTATGTGATTGCTGCTTTGA--ACTCATGTAGGGCTGAAAGCCATGGG-CTA [8063]  
Aca TTTTTATTCCCTATGTGATTGCTTTTTATA--ACTCATGTAGGGCTAAAAGCCATGGG-CTA [9359]  
Pbi TTTTTATTCCCTATGTGATTGCTTTTTATA--ATTTCATGTAGGGCTAAAAGCCATGGG-TTA [9748]  
Cpi TTTTTATTCCCTATGTGATTGCGTTTTCCCTA--ACTCATGTAGGGCTAAAAGCCATGGG-CTA [10092]  
Cmy TTTTTATTCCCTATGTGATTGCGTTTTCCCTA--ACTCATGTAGGGCTAAAAGCCATGGG-CTA [9760]  
Psi TTTTTATTCCCTATGTGATTGCTTTTTCCCTA--CCTCATGTAGGGCTAAAAGCCATGGG-CTA [9160]  
Asp TTTTTATTCCCTATGTGATTGCTTTTTCCCTA--CCTCATGTAGGGCTAAAAGCCATGGG-CTA [8722]  
Ami TTTTTATTCCCTATGTGATTGCTTTTTCCCTA--ACTCATGTAGGGCTAAAAGCCATGGG-CTA [9405]  
Asi TTTTTATTCCCTATGTGATTGCTTTTTCCCTA--ACTCATGTAGGGCTAAAAGCCATGGG-CTA [8944]  
Tgu TTTTTATTCCCTATGTGATTGCTTTCCCGA--ACTCATGTAGGGCGAAAAGCCATGGG-CTA [7370]  
Cli TTTTTATTCCCTATGTGATTGCTTTTTCCCTA--ACTCATGTAGGGCGAAAAGCCATGGG-CTA [9331]  
Gga TTTTTATTCCCTATGTGATTGCTTTTTCCCTA--ACTCATGTAGGGCGAAAAGCCATGGG-CTA [8404]  
Xtr TTTTTATTCCCTATGTGATTGC-TTTCCCTA-ATTCACATAGGGCAGAAAAGCCATGTG-CTG [9179]  
Lch TTTTTATTCCCTATGTGATTACTGTTTCCCTA--ACTCATGTAGGGTTGAAAAGCCATGGG-CTA [9775]

Dre TTTCTATTCCCTATGTGATTTTCTTCTGCCGTGTCACATAGGGTTCAAAGCCATTGG-GTA [9086]

Hsa CAGTGAGGGG--GGTCTCTGACTCTCTTCGGTGACGGGTATTCTTGGGTGGATAAATACG [9449]  
Mmu CAGTGAGGGG--GGCCCTCTGACTCTCTTCGGTGACGGGTATTCTTGGGTGGATAAATACG [9371]  
Mdo CAGGGAGGGG--ATCTTTCTGACTCTCTTCGGTGACGGGTATTCTTGGGTGGATAAATACG [8807]  
Meu CAGGGAGGGG--ATCTTTCTGACTCTCTTCGGTGACGGGTATTCTTGGGTGGATAAATACG [7423]  
Oan CAGAGAGGGG--GTCTTTCTGACTCTCTTCGGTGACGGGTATTCTTGGGTGGATAAATACG [8121]  
Aca CACAGAGGAA--AGCTTCTGACTCTCTTCGGTGACGGGTATTCTTGGGTGGATAAATACG [9417]  
Pbi CACAAAGGAA--AGCTTTCCGACTCTCTTCGGTGACGGGTATTCTTGGGTGGATAAATACG [9806]  
Cpi CACAGAGGAC--AGCTTTCTGACTCTCTTCGGTGACGGGTATTCTTGGGTGGATAAATACG [10150]  
Cmy CATAGAGGAC--AGATTTCTGACTCTCTTCGGTGACGGGTATTCTTGGGTGGATAAATACG [9818]  
Psi CACAGAGGAC--AGATTTCTGACTCTCTTCGGTGACGGGTATTCTTGGGTGGATAAATACG [9218]  
Asp CACAGAGGAC--AGATTTCTGACTCTCTTCGGTGACGGGTATTCTTGGGTGGATAAATACG [8780]  
Ami CACAGAGGAT--AGCTTTCTGACTCTCTTCGGTGACGGGTATTCTTGGGTGGATAAATACG [9463]  
Asi CACAGAGGAT--AGCTTTCTGACTCTCTTCGGTGACGGGTATTCTTGGGTGGATAAATACG [9002]  
Tgu CACAGAGGAG--AGCTTTCTGACTCTCTTCGGTGACGGGTATTCTTGGGTGGATAAATACG [7428]  
Cli CACAGAGGAG--AGCTTTCTGACTCTCTTCGGTGACGGGTATTCTTGGGTGGATAAATACG [9389]  
Gga CTCAGGGGAG--AGCTTTCTGACTCTCTTCGGTGACGGGTATTCTTGGGTGGATAAATACG [8462]  
Xtr CACAGGGGAC--TGCTCTGTGGCTCTCTTCGGTGACGGGTATTCTTGGGTGGATAAATACG [9237]  
Lch CTCAGTGGGA--CTTTATAAGACTCTTTTCGGTGACGGGTATTCTTGGGTGGATAAATACG [9833]  
Dre CAGAGTGAA--CTATAAAGGACTCTCTTCGGTGACGGGTATTCTTGGGTGGATAAATACG [9144]

Hsa GATTACGTTGTTATTGCTTAAGAATACGCGTAGTCGAGGAGAGTACCAGCGGC----- [9502]  
Mmu GATTACGTTGTTATTGCTTAAGAATACGCGTAGTCGAGGAGAGTACCAGCGGC----- [9424]  
Mdo GATTACGTTGTTATTGCTTAAGAATACGCGTAGTCGAGGAGAGTACCTGCAGC--ATTGC [8865]  
Meu GATTACGTTGTTATTGCTTAAGAATACGCGTAGTCGAGGAGAGTACCTGCAGC--AATGG [7481]  
Oan GATTACGTTGTTATTGCTTAAGAATACGCGTAGTCGAGGAGAGTATCTGCAGC--AGCCC [8179]  
Aca GATTACGTTGTTATTGCTTAAGAATACGCGTAGTCGAGGAGAGTACTCGCGGC--ACTGA [9475]  
Pbi GATTACGTTGTTATTGCTTAAGAATACGCGTAGTCGAGGAGAGTACTCGCGGC--ATGAC [9864]  
Cpi GATTACGTTGTTATTGCTTAAGAATACGCGTAGTCGAGGAGAGTACCGGCGGC--GCCCA [10208]  
Cmy GATTACGTTGTTATTGCTTAAGAATACGCGTAGTCGAGGAGAGTACCCGCGGC--GCCCG [9876]  
Psi GATTACGTTGTTATTGCTTAAGAATACGCGTAGTCGAGGAGAGTACCCGCGGC--GCTCA [9276]  
Asp GATTACGTTGTTATTGCTTAAGAATACGCGTAGTCGAGGAGAGTACCCGCGGC--GCTCA [8838]  
Ami GATTACGTTGTTATTGCTTAAGAATACGCGTAGTCGAGGAGAGTACC-GCGGC--GGAGC [9520]  
Asi GATTACGTTGTTATTGCTTAAGAATACGCGTAGTCGAGGAGAGTACC-GCGGC----- [9054]  
Tgu GATTACGTTGTTATTGCTTAAGAATACGCGTAGTCGAGGAGAGTACCGGCGGC----- [7481]  
Cli GATTACGTTGTTATTGCTTAAGAATACGCGTAGTCGAGGAGAGTACCGGCGGC--GGCCC [9447]  
Gga GATTACGTTGTTATTGCTTAAGAATACGCGTAGTCGAGGAGAGTACCGGCGGC----- [8515]  
Xtr GATTACGTTGTTATTGCTTAAGAATACGCGTAGTTCGAGGAGAGTATCTTCAGC----- [9290]  
Lch GATTACGTTGTTATTGCTTAAGAATACGCGTAGTCGAGGAGAGTACCTTCTCC--TCAAT [9891]  
Dre GCTCTCGTTGTTATTGCTTAAGAATACGCGTAGTCGAGGAGAGTCATGTCGGC----- [9197]

Hsa ----- [9502]  
Mmu ----- [9424]  
Mdo CTAGCCCCCGCGATGACGGGTATTCTTGGGTAGATAAATACCAATGGCGCTGTTATTGCT [8925]  
Meu CTGGCCCCCGCGATGACGGGTATTCTTGGGTAGATAAATACCGATGGCGCTGTTATTGCT [7541]  
Oan CCAGCCCCCTTCGATGACGGGTATTCTTGGGTACATAAATACCGATGGCGCTGTTATTGCT [8239]  
Aca CTAGCTCCCTTCAATAACGGGTATTCTTGGGTATATAAATACAGATGGCGTTGTTATTGCT [9535]  
Pbi TATGCTCCCTTCGATGACGGGTATTCTTGGGTATATAAATACAGATGGCGTTGTTATTGCT [9924]  
Cpi CTAGCTCCCTTCGATGACGGGTATTCTTGGGTAGATAAATACGGATTGCGTTGTTATTGCT [10268]  
Cmy CTAGCTCCCTTCGGCGACGGGTATTCTTGGGTAGATAAATACGGATTGCGTTGTTATTGCT [9936]  
Psi CGAGCTCTCTTCGGCGACGGGTATTCTTGGGTAGATAAATACGGATTGCGTTGTTATTGCT [9336]  
Asp CGAGCTCTCTTCGGCGACGGGTATTCTTGGGTAGATAAATACGGATTGCGTTGTTATTGCT [8898]  
Ami CCAGCTCCCTTCGATGACGGGTATTCTTGGGTAGATAAATACGGCTGGCGTTGTTATTGCT [9580]  
Asi ----- [9054]  
Tgu ----- [7481]  
Cli CCCGCTCCCTTCGGCAACGGGTATTCTCGGGCGGATAAATACGGAC-GCGCTGTTATTGCT [9506]

|     |                                                                |           |
|-----|----------------------------------------------------------------|-----------|
| Gga | -----                                                          | [ 8515 ]  |
| Xtr | -----                                                          | [ 9290 ]  |
| Lch | GCTATTCCCTTCGGCAACGGGTATTCTTGGGTAGATAAATACGGATTGCGTTGTTATTGCT  | [ 9951 ]  |
| Dre | -----                                                          | [ 9197 ]  |
|     |                                                                |           |
| Hsa | -----TGGTGTGGTGGGGCAGCTGGTG                                    | [ 9524 ]  |
| Mmu | -----TGGTGTGTGGGACAGCTGGTG                                     | [ 9446 ]  |
| Mdo | TGAGAATACACGTAGTCGAGGG-GAGGCCTCTTCGA--CGGCCTGGTGTGGCAGCTGGTG   | [ 8982 ]  |
| Meu | TGAGAATACACGTAGTCGAGGG-GAGGCGCCTTCGA--TGGCAAGGTGTGGCAGCTGGTG   | [ 7598 ]  |
| Oan | TGAGAATACGCGTAGTCGAGGGAGAGGCACCGACGT--AGGTATGGTGAAGCAGCTGGTG   | [ 8297 ]  |
| Aca | TGAGAATACGCGTAGTTGAGGG-GATGCTGATTTCAT--TGGCTTGGTGTAGCAGCTGGTG  | [ 9592 ]  |
| Pbi | TGAGAATACGCGTAGTTGAGGG-GAAGTTGCTTCAG--TGGCTCAGTGTAGCAGCTGGTG   | [ 9981 ]  |
| Cpi | TGAGAATACGCGTAGCCGAGGG-GAGAGTCGCTCAT-----                      | [ 10303 ] |
| Cmy | TGAGAATACGCGTAGCCGAGGG-GAGAGTCTCTCAT--TGGTATGGTGCAGCAGCTGGTG   | [ 9993 ]  |
| Psi | TGAGAATACGCGTAGCCGAGGG-GAGCGCTGCTCAT--TGGTATGGTATAGCAGCTGGTG   | [ 9393 ]  |
| Asp | TGAGAATACGCGTAGCCGAGGG-GAGAGCTGCTCAT--TGGTATGGTATAGCAGCTGGTG   | [ 8955 ]  |
| Ami | TGAGAATACGCGTAGTCGAGGG-GAGAGACACTCGC--TGGTACAGTGTGCAGCTGGTG    | [ 9637 ]  |
| Asi | -----TGGTACAGTGTGCAGCTGGTG                                     | [ 9076 ]  |
| Tgu | -----AGGTGCTGTGCAACAGCTGGTG                                    | [ 7503 ]  |
| Cli | TGAGAATACGCGTAGCCGAGGG-GACGCCCCGCCCC--AGGTGCCGTGCAGCAGCTGGTG   | [ 9563 ]  |
| Gga | -----GGGTGCCGTGCAGCAGCTGGTG                                    | [ 8537 ]  |
| Xtr | -----CGGTGCGGAGCAGCAGCTGGTG                                    | [ 9312 ]  |
| Lch | TGAGAATACGCGTAGTCGAGGG-GAGTCGTGCTCAG--TGGTTTGGTGCAGCAGCTGGTG   | [ 10008 ] |
| Dre | -----TGATGGAGCAGGACAGCTGGTG                                    | [ 9219 ]  |
|     |                                                                |           |
| Hsa | TTGTGAATCAGGCCGTTGCCAATCAGAGA-ACGGCTACTTCACAACACCAGGGCCACACC   | [ 9583 ]  |
| Mmu | TTGTGAATCAGGCCGTTGCCAATCAGAGA-ACGGCTACTTCACAACACCAGGGCCACACT   | [ 9505 ]  |
| Mdo | TTGTGAATCAGGCCGTCGCCAGTCTGAGA-ACGGCTACTTCACAACACCAGGGTCACCCC   | [ 9041 ]  |
| Meu | TTGTGAATCAGGCCGCGCCAGTCTCAGA-ACGGCTCCTTCACAACACCAGGGTCACCCC    | [ 7657 ]  |
| Oan | TTGTGAATCAGGCCGTCGCCAATCTGAGA-ACGGCTACTTCACAACACCAGGGTTGCACC   | [ 8356 ]  |
| Aca | TTGTGAATCAGGCCGTTGCCAAAGAGAGA-ACGGCTACTTCACAACACCAGGGTTGCCCC   | [ 9651 ]  |
| Pbi | TTGTGAATCAGGCCGTCACCTATTAGAGA-ACGGCTACTTCACAACACCAGGGTTGCCCT   | [ 10040 ] |
| Cpi | -----                                                          | [ 10303 ] |
| Cmy | TTGTGAATCAGGCCGTCACCAATCAGAGA-ACGGCTACTTCACAACACCAGGGTTGTACC   | [ 10052 ] |
| Psi | TTGTGAATCAGGCCGTTGCCAATCAGAGA-ACGGCTACTTCACAACACCAGGGTTGTATC   | [ 9452 ]  |
| Asp | TTGTGAATCAGGCCGTTGCCAATCAGAGA-ACGGCTACTTCACAACACCAGGGTTGTATC   | [ 9014 ]  |
| Ami | TTGTGAATCAGGCCGTCACCGATCAGAGA-ACGGCTACTTCACAACACCAGGGTTGCACC   | [ 9696 ]  |
| Asi | TTGTGAATCAGGCCGTCACCGATCAGAGA-ACGGCTACTTCACAACACCAGGGTTGCACC   | [ 9135 ]  |
| Tgu | TTGTGAATCAGGCCGTCACCGATCGGAGA-ACGGCTACTTCACAACACCAGGGTCGCACC   | [ 7562 ]  |
| Cli | TTGTGAATCAGGCCGTCACCGATCGGAGA-ACGGCTACTTCACAACACCAGGGTCGCACC   | [ 9622 ]  |
| Gga | TTGTGAATCAGGCCGTCACCGATCGGAGA-ACGGCTACTTCACAACACCAGGGTGGCACT   | [ 8596 ]  |
| Xtr | TTGTGAATCAGGCCGTCACCGATCAGAAA-ACGGCTACTTCACAACACCAGGGTTGCTTC   | [ 9371 ]  |
| Lch | TTGTGAATCAGGCCGCCACCAATCAGAGA-ACGGCTACTTCACAACACCAGGGTTGCACC   | [ 10067 ] |
| Dre | TTGTGAATCAGGCCGCCGTTGGTGAAAGGGTACGGCTTCTTCACAACACCAGGGTCTCACT  | [ 9279 ]  |
|     |                                                                |           |
| Hsa | ACACT--GTATCGTTGCTGCAGCTGGTGTGTGTGAATCAGGCCGACGAGCAGCGCATCCTC  | [ 9641 ]  |
| Mmu | GCACT--GTATGGTTGCTGCAGCTGGTGTGTGTGAATCAGGCCGACGAGCAGCGCATCCTC  | [ 9563 ]  |
| Mdo | CTGCC--GTATTGTTGCTGCAGCTGGTGTGTGTGAATCAGGCCGACAAGCAGCTCATCCTA  | [ 9099 ]  |
| Meu | CCGCC--GTATTGTTGCTGCAGCTGGTGTGTGTGAATCAGGCCGACAAGCAGCTCATCCTA  | [ 7715 ]  |
| Oan | CTGCC--GTATCGGTGCTGCAGCTGGTGTGTGTGAATCAGGCCGACGAGCAGCGAGTCCTA  | [ 8414 ]  |
| Aca | CTGCC--GTATTGTTGCTGCAGCTGGTGTGTGTGAATCAGGCCGACAAAAGCAGCATCTTA  | [ 9709 ]  |
| Pbi | GTACC--GTATTGTTGCTGCAGCTGGTGTGTGTGAATCAGGCCGACATAAAGTGCATCTTA  | [ 10098 ] |
| Cpi | -----GTATTGTTGCTGCAGCTGGTGTGTGTGAATCAGGCCGACAACAAGCTCATCCTA    | [ 10356 ] |
| Cmy | CTACC--GTATTGTTGCTGCAGCTGGTGTGTGTGAATCAGGCCGACAACAAGCTCATCCTA  | [ 10110 ] |
| Psi | CTGCC--GTATTGTTGCTGCAGCTGGTGTGTGTGAATCAGGCCGACAACAAGCTCATCCTA  | [ 9510 ]  |
| Asp | TTGCC--GTATTGTTGCTGCAGCTGGTGTGTGTGAATCAGGCCGACAACAAGCTCATCCTA  | [ 9072 ]  |
| Ami | CTACC--GTATTGTTGCTGCAGCTGGTGTGTGTGAATCAGGCCGACAACAAGCAGCATCCTA | [ 9754 ]  |

Asi CTACC--GTATTGTTGCTGCAGCTGGTGTGTGAATCAGGCCGACAACAAGCGCATCCTA [9193]  
Tgu GCACC--GTATTGTTGCTGCAGCTGGTGTGTGAATCAGGCCGACGACAAGCGCTTCCTA [7620]  
Cli GCACC--GTATTGGTGCAGCTGGTGTGTGAATCAGGCCGACGACAAGCGCATCCTA [9680]  
Gga GCACC--GTATTGTTGCTGCAGCTGGTGTGTGAATCAGGCCGACGGCAAGCGCTTCCTA [8654]  
Xtr TCACC----- [9376]  
Lch TTGCT--GTATTGGTGCAGCTGGTGTGTGAATCAGGCCGGCAAAAAGTACCTGCTA [10125]  
Dre TCATC--GTGTGTGTGCTGCAGCTGGTGTGTGAATCAGGCCGATGTACACGTCAGCGA [9337]

Hsa TTACCCGGCTATTTACAGACACCAGGGTTGCATCATAACC--GGCTCAGGTGTATTCTACA [9699]  
Mmu TTACCCGGCTATTTACAGACACCAGGGTTGCACCCTACC--GGCGCAGGTGTATTCTACA [9621]  
Mdo TTACCCGGCTATTTACTACACCAGGGTTGCATCATAACC--GGCCCGGGTGTATTCTACA [9157]  
Meu TTACCCGGCTATTTACACCACACCAGGGTTGCATCATAACC--GGCCCGGGTGTATTCTACA [7773]  
Oan ATACCCGGCTATTTACTACACCAGGGTTGCATCATAACC--GGCCCGGGTGTAGTCTACA [8472]  
Aca CTATCCGGCTATTTACTACACCAGGGTTGCATCATAACC--GGCCTGGCTGTATTCTACA [9767]  
Pbi CTATCCGGCTATTTACTACACCAGGGTGCATCGTACC--GGCCTGGCTGTATTCTACA [10156]  
Cpi CTATCCGGCTATTTACTACACCAGGGTTGCATCATAACC--GGCCTGGCTGTATTCTACA [10414]  
Cmy CTATCCGGCTATTTACTACACCAGGGTTGCATCATAACC--GGCCTGGCTGTATTCTACA [10168]  
Psi CTATCCGGCTATTTACTACACCAGGGTTGCATCATAACC--GGCCTGGCTGTATTCTACA [9568]  
Asp CTATCCGGCTATTTACTACACCAGGGTTGCATCATAACC----- [9111]  
Ami CTATCCGGCTATTTACTACACCAGGGTTGCATCATAACC--GGCCTGGCTGTATTCTACA [9812]  
Asi CTATCCGGCTATTTACTACACCAGGGTTGCATCATAACC--GGCCTGGCTGTATTCTACA [9251]  
Tgu CAATCCGGCTATTTACTACACCAGGGTTGCATCATAACC--GGCCTGGCTGTATTCTACA [7678]  
Cli CTATCCGGCTATTTACTACACCAGGGTTGCATCATAACC--GGCCTGGCTGTATTCTACA [9738]  
Gga CTATCCGGCTATTTACTACACCAGGGTTGCATCATAACC--GGCCAGGCTGTATTCTACA [8712]  
Xtr -----GGCCTGGGTGTATTCTACA [9395]  
Lch CGATCCGGCTATTTACACAACACCAGGGTTGCATCATAACC--GGCTTGGCTGTATTCTACA [10183]  
Dre TAACCCGGCTATTTACACAACACCAGGGTGGCACCACACC--GGTCTGGCTGTATTCTACA [9395]

Hsa GTGCACGTGTCTCCAGTGTGGCTC--GGAGGCTGGAGACGCGGCCCTGTTGGAGTAACAAC [9758]  
Mmu GTGCACGTGTCTCCAGTGTGGCTC--GGAGGCTGGAGACGCGGCCCTGTTGGAGTAACAAC [9680]  
Mdo GTGCATGTGTCTCCAGTGTGACTA--AGGGACTGGAGATACAGCCCTGTTGGAATAACAAC [9216]  
Meu GTGCATGTGTCTCCAGTGTGACTA--AGGGACTGGAGATACAGCCCTGTTGGAATAACAAC [7832]  
Oan GTGCATGTGTCTCCAGGGACACTA--GACAGCTGGAGACACAGCTCTGTTGGA--TA--CAAC [8529]  
Aca GTGCATGTGTCTCCAGTGTTTTCC--AGCGACTGGAGATACGCGGCCCTGTTGGAATAACAGC [9826]  
Pbi GTGCATGTGTCTCCAGCGTCTGTA--AGCAGCTGGAGATACGCGGCCCTGTTGGAATAACAGC [10215]  
Cpi GTGCATGTGTCTCCAGTGTACTA--AGCAACTGGAGATGCAGCCCTGTTGGAATAACAGC [10473]  
Cmy GTGCATGTGTCTCCAGTGTACTA--AGCAACTGGAGATGCAGCCCTGTTGGAATAACAGC [10227]  
Psi GTGCATGTGTCTCCAGTGTACTA--AGCAACTGGAGAGACAGCCCTGTGGGAAT----- [9621]  
Asp ----- [9111]  
Ami GTGCATGTGTCTCCAGTGTTTCTA--AGCGACTGGAGATACAGCCCTGTCGGAATAACAGC [9871]  
Asi GTGCATGTGTCTCCAGTGTTTCTA--AGCGACTGGAGATACAGCCCTGTCGGAATAACAGC [9310]  
Tgu GTGCATGTGTCTCCAGTGTGAGTA--AGTGACTGGAGATGCGGCCCTGTTGGAATAACATC [7737]  
Cli GTGCATGTGTCTCCAGTGTGAGTA--AGTGACTGGAGATGCAGCCCTGTTGGAATAACAAC [9797]  
Gga GTGCATGTGTCTCCAGTGTCACTC--AGCAACTGGGGACACAGCCCTGTTGGAATCACAGC [8771]  
Xtr GTGCATGTGTCTCCAGTCATATAG--AGGCACTGGGGATACAGCTCTGTTGGAATAACAAT [9454]  
Lch GTGCATGTGTCTCCAGTGGTTCTA--GGCAGCTGGAGATACAGCCCTGTTGGAATAACAAC [10242]  
Dre GTGCATGTGTCTCCAGTGTTTCTATGGCGACTGGGGAGGCAGCGCTGTTGGAATAACAAC [9455]

Hsa TGAAGCC--GTGTCT--CTCTCTGTGTCTCCAGTGGTTTTACCCTATGGTAGGTTACG [9814]  
Mmu TGAAGCC--GTGTCT--CTCTCTGTGTCTCCAGTGGTTTTACCCTATGGTAGGTTACG [9736]  
Mdo CGAAGCC--GTGTCT--CTCTCTGTGTCTCCAGTGGTTTTACCCTATGGTAGGTTACG [9272]  
Meu CGAAGCC--GTGTCT--CTCTCTGTGTCTCCAGTGGTTTTACCCTATGGTAGGTTACG [7888]  
Oan CGAAGCC--GTGTCT--CTCTCTGTGTCTCCAGTGGTTTTACCCTATGGTAGGTTACG [8585]  
Aca CAGAGCC--CTTCCT--CTCTCTGTGTCTCCAGTGGTTTTACCCTATGGTAGGTTACG [9882]  
Pbi CAGAGCT----- [10222]  
Cpi CAGAGCC--CTGTCT--CTCTCTGTGTCTCCAGTGGTTTTACCCTATGGTAGGTTACG [10529]  
Cmy CAGAGCC--GTGTCT--CTCTCTGTGTCTCCAGTGGTTTTACCCTATGGTAGGTTACG [10283]



Psi ----- [9621]  
Asp ----- [9111]  
Ami CAGCGCC--TGCTCT--CTCTCTGTGTCTCTGCCAGTGGTTTTTACCCTATGGTAGGTTACG [9927]  
Asi CAGCGCC--TGCTCT--CTCTCTGTGTCTCTGCCAGTGGTTTTTACCCTATGGTAGGTTACG [9366]  
Tgu CAGTGCC--CCACCT--CTCTCCGTGTCTCTGCCAGTGGTTTTTACCCTATGGTAGGTTACG [7793]  
Cli CGGGACC--CCGCCT--CTCTCCGTGTCTCTGCCAGTGGTTTTTACCCTATGGTAGGTTACG [9853]  
Gga CTGTGCC--CTGCGT--CTCTCCGTGTCTCTGCCAGTGGTTTTTACCCTATGGTAGGTTACG [8827]  
Xtr CAGTGCC--CTCTCC--CTCTCTGTGTCTCTCCCAGTGGTTTTTACCCTATGGTAGGTTACG [9510]  
Lch TAAGACC--GTGTGT--TTCCCTGTGTCTAGCCAGTGGTTTTTACCCTATGGTAGGTTACG [10298]  
Dre CAGAACC--GTGTTTG--TCTCCTGTGTCCCGTCAGTGGTTTTTACCCTATGGTAGGTTACG [9512]

Hsa TCATGCTGTTTCTACCACAGGGTAGAACCACGGACAGGATAACCGGGCACC--CAGTGCAG [9872]  
Mmu TCATGCTGTTTCTACCACAGGGTAGAACCACGGACAGGATACTGGAGCACC--CAGTGCAG [9794]  
Mdo TCATGCTGTTTCTACCACAGGGTAGAACCACGGACAGGATACTGGGGCGCT--CAGTGCAG [9330]  
Meu TCATGCTGTTTCTACCACAGGGTAGAACCACGGACAGGATACTGGGGCGCT--CAGTGCAG [7946]  
Oan TCATGCTGTTTCTACCACAGGGTAGAACCACGGACAGGATAACCGGGACGCT--CAGTGCAG [8643]  
Aca TCATGCTGTTTCTACCACAGGGTAGAACCACGGACGGGATGCCGGGGCTCT--CAGTGGAC [9940]  
Pbi -----CAGTGGAC [10230]  
Cpi TCATGCTGTTTCTACCACAGGGTAGAACCACGGACAGGATAACCGGG--CGCT--CAGTGCAG [10586]  
Cmy TCATGCTGTTTCTACCACAGGGTAGAACCACGGACAGGATAACCGGG--CGCT--CAGTGCAG [10340]  
Psi ----- [9621]  
Asp ----- [9111]  
Ami TCATGCTGTTTCTACCACAGGGTAGAACCACGGACGGGATAACCGGGCGCG--CAGTGCAG [9985]  
Asi TCATGCTGTTTCTACCACAGGGTAGAACCACGGACGGGATAACCGGGCGCG--CAGTGCAG [9424]  
Tgu TCATGCTGTTTCTACCACAGGGTAGAACCACGGACAGGATGCCGGGGCTGC--CAGTGCAG [7851]  
Cli TCATGCTGTTTCTACCACAGGGTAGAACCACGGACGGGATGCTGGGGCTGC--CAGTGCAG [9911]  
Gga TCATGCTGTTTCTACCACAGGGTAGAACCACGGACGGGATGCCGGGGCTGC--CAGTGCAG [8885]  
Xtr TCAGGCTGTTTCTACCACAGGGTAGAACCACGGACAGGATAACCGGGAGCTC--CAGTGCAG [9568]  
Lch TCATGCTGTTTCTACCACAGGGTAGAACCACGGACCGGATAACAGGGGTTTC--CAGTGGAG [10356]  
Dre TCATGCTGTTTCTACCACAGGGTAGAACCACGGACGGGATGTCTGGAGGTG--CAGTGCAG [9570]

Hsa TCACCCATAAAGTAGAAAGCACTACTAA--CAGCACTG--GAGGGTGTAGTGTTCCTACTTT [9930]  
Mmu TCACCCATAAAGTAGAAAGCACTACTAA--CAGCACTG--GAGGGTGTAGTGTTCCTACTTT [9852]  
Mdo TCACCCATAAAGTAGAAAGCACTACTAA--CAGCAATG--TAGGGTGTAGTGTTCCTACTTT [9388]  
Meu TCACCCATAAAGTAGAAAGCACTACTAA--CAGCAATG--TAGGGTGTAGTGTTCCTACTTT [8004]  
Oan TCATCCATAAAGTAGAAAGCACTACTAA--CAGCGCTG--TAGGGTGTAGTGTTCCTACTTT [8701]  
Aca TCATCCATAAAGTAGAAAGCACTACTAAACGCCTGTGCCCAAGTGTAGTGTTCCTACTTT [10000]  
Pbi TCATCCATAAAGTAGAAAGCACTACTAAACGCCTGTGTCCAAGTGTAGTGTTCCTACTTT [10290]  
Cpi TCACCCATAAAGTAGAAAGCACTACTAAACAGCACTG--CAGGGTGTAGTGTTCCTACTTT [10645]  
Cmy TCACCCATAAAGTAGAAAGCACTACTAAACAGCACTG--CAGGGTGTAGTGTTCCTACTTT [10399]  
Psi ----- [9621]  
Asp ----- [9111]  
Ami TCACCCATAAAGTAGAAAGCACTACTAAACAGCACTG--CAGGGTGTAGTGTTCCTACTTT [10044]  
Asi TCACCCATAAAGTAGAAAGCACTACTAAACAGCACTG--CAGGGTGTAGTGTTCCTACTTT [9483]  
Tgu TCACCCATAAAGTAGAAAGCACTACTAAACAGCACTG--CAGGGTGTAGTGTTCCTACTTT [7910]  
Cli TCACCCATAAAGTAGAAAGCACTACTAAACAGCACTG--CAGGGTGTAGTGTTCCTACTTT [9970]  
Gga TCACCCATAAAGTAGAAAGCACTACTAAACAGCACTG--CAGGGTGTAGTGTTCCTACTTT [8944]  
Xtr CCACCCATAAAGTAGAAAGCACTACTAGACAGGACTG--AACGCTGTAGTGTTCCTACTTT [9627]  
Lch TCATCCATAAAGTAGAAAGCACTACTAAACCTTTCAA--TTCAGTGTAGTGTTCCTACTTT [10415]  
Dre TCATCCATAAAGTAGAAAGCACTACTAAACCCCTCGC--CACAGTGTAGTGTTCCTACTTT [9629]

Hsa TATGGATGAGTGTACTGT--CTGTCTCCCAGCCTGAGGTGCAGTGCTGCATCTCTGGTCA [9988]  
Mmu TATGGATGAGTGTACTGT--CTGTCTCCCAGCCTGAGGTGCAGTGCTGCATCTCTGGTCA [9910]  
Mdo TATGGATGAGTGTACTGT--CTGTCTCCCAGCCGAGGTGCAGTGCTGCATCTCTGGTCA [9446]  
Meu TATGGATGAGTGTACTGT--TTGTCTCCCAGCCGAGGTGCAGTGCTGCATCTCTGGTCA [8062]  
Oan TATGGATGAGTGTACTGT--ATGTCTCCCAGCCGAGGTGCAGTGCTGCATCTCTGGTCA [8759]  
Aca TATGGATGAGTGTACTGT--ATGTCTCCCAGCCGAGGTGCAGTGCTGCATCTCTGGTCA [10058]

Pbi TATGGATGAGTGTACTGT--ATGTCTCCCAGCCCAAGGTGCAGTGCTGCATCTCTGGTCA [10348]  
Cpi TATGGATGAGTGTACTGT--ATGTCTCCCAGCCCAAGGTGCAGTGCTGCATCTCTGGTCA [10703]  
Cmy TATGGATGAGTGTACTGT--ATGTCTCCCAGCCCAAGGTGCAGTGCTGCATCTCTGGTCA [10457]  
Psi -----ATGTCTCCCAGCCCAAGGTGCAGTGCTGCATCTCTGGTCA [9661]  
Asp -----ATGTCTCCCAGCCCAAGGTGCAGTGCTGCATCTCTGGTCA [9151]  
Ami TATGGATGAGTGTACTGT--ATGTCTCCCAGCCCAAGGTGCAGTGCTGCATCTCTGGTCA [10102]  
Asi TATGGATGAGTGTACTGT--ATGTCTCCCAGCCCAAGGTGCAGTGCTGCATCTCTGGTCA [9541]  
Tgu TATGGATGAGTGTACTGT----- [7928]  
Cli TATGGATGAGTGTACTGT--ATGTCTCCCAGCCCAAGGTGCAGTGCTGCATCTCTGGTCA [10028]  
Gga TATGGATGAGTGTACTGT--ATGTCTCCCAGCCCAAGGTGCAGTGCTGCATCTCTGGTCA [9002]  
Xtr TATGGATGAGTGTACTGG--CTGTCTCCCAGCCCAAGGTGCAGTGCTGCATCTCTGGTCA [9685]  
Lch TATGGATGAGTGTACTGT--ATGTCTCCCAGCCCGAGGTGCAGTGCTGCATCTCTGGTCA [10473]  
Dre TATGGATGAGTGTACTGT--CAGTCGTCTGGCCCGGGTGCAGTGCTGCATCTCTGGTCA [9687]

Hsa GTTGGGAGTCTGAGATGAAGCACTGTAGCTCAGGAAGAGAGAAGT--GGGGCCCTGGCTG [10046]  
Mmu GTTGGGAGTCTGAGATGAAGCACTGTAGCTCAGGAAGGGAGAAGA--AGGACCTTGGCTG [9968]  
Mdo GTTGTGAGTCTGAGATGAAGCACTGTAGCTCGGGAAGGGAGGAAC--GGGGCCAGGCCG [9504]  
Meu GTTGTGAGTCTGAGATGAAGCACTGTAGCTCGGGAAGGGAGGAAC--GGTGCCCTGGCCA [8120]  
Oan GTTGTGAGTCTGAGATGAAGCACTGTAGCTCGGGAAGGGAGGAGC--GGGGCCCTGGCGG [8817]  
Aca GTTGTGAGTCTGAGATGAAGCACTGTAGCTCGGGAAGGGAGGAAC--AAGTCTCTGGGCC [10116]  
Pbi GTTGTGAGTCTGAGATGAAGCACTGTAGCTCAGGAAGGGAGGAAC--GGGGCTCCAGCTC [10406]  
Cpi GTTGTGAGTCTGAGATGAAGCACTGTAGCTCGGGAAGGGAGGAAC--GGGGCTCTGGGCA [10761]  
Cmy GTTGTGAGTCTGAGATGAAGCACTGTAGCTCGGGAAGGGAGGAAC--GGGGCTCTGGGCA [10515]  
Psi GTTGTGAGTCTGAGATGAAGCACTGTAGCTCGGGAAGGGAGGAGC----- [9706]  
Asp GTTGTGAGTCTGAGATGAAGCACTGTAGCTCGGGAAGGGAGGAGC--GGGGCTCTGGGCA [9209]  
Ami GTTGTGAGTCTGAGATGAAGCACTGTAGCTCGGGAAGGGAGGAAC--GGGGCTCTGGGCA [10160]  
Asi GTTGTGAGTCTGAGATGAAGCACTGTAGCTCGGGAAGGGAGGAAC--GGGGCTCTGGGCA [9599]  
Tgu -----GCTGTCCCAGGCA [7941]  
Cli ATTGGGAGTCTGAGATGAAGCACTGTAGCTCGGGAAGGGAGGAAC--GCTCCCCTGGGCA [10086]  
Gga ATTGGGAGTCTGAGATGAAGCACTGTAGCTCGGGAAGGGAGGAAC--GCCGCCCTGGGCT [9060]  
Xtr GTTGTGAGTCTGAGATGAAGCACTGTAGCTCGGGAAGGGGGAATA--GGGACTGTGTTTG [9743]  
Lch GTTGTGAGTCTGAGATGAAGCACTGTAGCTCAGGAAGGGGAAAC--AACAGTCAGAGTA [10531]  
Dre ACTGGGAGTCTGAGATGAAGCACTGTAGCTCGGGA--GGACAACAC--TGCTCTCTAGACA [9744]

Hsa GGATATCATCATATACTGTAAGTTTGGCAT--GAGACACTACAGTATAGATGATGTACTAG [10105]  
Mmu GGATATCATCATATACTGTAAGTTTGTGAT--GAGACACTACAGTATAGATGATGTACTAG [10027]  
Mdo GGATATCATCGTATACTGTAAGTTTGAAT--GAGACACTACAGTATAGATGATGTACTGG [9563]  
Meu GGATATCATCGTATACTGTAAGTTTGAAT--GAGACACTACAGTATAGATGATGTACTGG [8179]  
Oan GGATATCATCGTATACTGTAAGTTTGTCTAT--GAGACACTACAGTATAGATGATGTACTAG [8876]  
Aca GGATATCATCATATACTGTAAGTTGG--AAT--GAGACACTACAGTATAGATGATGTACTAC [10174]  
Pbi GGATATCATCATATACTGTAAGTTGG--AAT--CAGACACTACAGTATAGATGATGTACTAT [10464]  
Cpi GGATATCATCGTATACTGTAAGTTTGTCTAT--GAGACACTACAGTATAGATGATGTACTAT [10820]  
Cmy GGATATCATCGTATACTGTAAGTTTGTCTAT--GAGACACTACAGTATAGATGATGTACTAT [10574]  
Psi ----- [9706]  
Asp GGATATCATCATATACTGTAAGTTTGTCTAT--GAGACACTACAGTATAGATGATGTACTAT [9268]  
Ami GGATATCATCGTATACTGTAAGTTCGGCTAT--GAGACACTACAGTATAGATGATGTACTAC [10219]  
Asi GGATATCATCGTATACTGTAAGTTCGGATAT--GAGACACTACAGTATAGATGATGTACTAC [9658]  
Tgu GGATATCATCGTATACTGTAAGTTGGCTAT--GAGACACTACAGTATAGATGATGTACTCC [8000]  
Cli GGATATCATCGTATACTGTAAGTTCGGCTAT--GAGACACTACAGTATAGATGATGTACTC-- [10144]  
Gga GGATATCATCATATACTGTAAGTTCACTAT--GAGACACTACAGTATAGATGATGTACTCC [9119]  
Xtr GGATATCATCATATACTGTAAGTTTGTTTT--AAGACACTACAGTATAGATGATGTACTAC [9802]  
Lch GGATATCATCATATACTGTAAGTTTGTCTATAGAGACACTACAGTATAGATGATGTACTAC [10591]  
Dre GGATATCATCGTATACTGTAAGTTTATTATTGAGACACTACAGTATAGATGATGTACTAT [9804]

Hsa TCCGGGCACC--CTTGTCTCACGGTCCAGTTTTCAGGAATCCCTTAGATGCTAAGAT [10163]  
Mmu TCTGGGTACC--CTTGTCTCACGGTCCAGTTTTCAGGAATCCCTTAGATGCTAAGAT [10085]  
Mdo CGAGGGCCGC--CTTGTCTCACGGTCCAGTTTTCAGGAATCCCTTAGATGCTAAGAT [9621]

Meu TATGGGTCAC--CTTGTCTCAGGGTCCAGTTTTCCAGGAATCCCTTAGGTGCTAAGAT [8237]  
Oan CCCGGGTGCC--CGTGTCTCAGGGTCCAGTTTTCCAGGAATACAT-AGGTGCTGAGAT [8931]  
Aca CTTTACCTAA--TGTGTCTCAGGGTCCAGTTTTCCAGGAATCCCTTAGATGATAAGAG [10232]  
Pbi CTGGAGCTCC--TATGTCTCAGGGTCCAGTTTTCCAGGAATCCCTTAGATGCTAAGAA [10522]  
Cpi CCTGAGCTTC--CGTGTCTCAGGGTCCAGTTTTCCAGGAATCCCTTAGGCACTATGAC [10878]  
Cmy CCTGAGCTTC--CGTGTCTCAGGGTCCAGTTTTCCAGGAATCCCTTAGGCACTATGAC [10632]  
Psi -----CGTGTCTCAGGGTCCAGTTTTCCAGGAATCCCTTAGGCACTCTGAG [9754]  
Asp CCTGAGCCTC----- [9278]  
Ami CCCGGCCTTT--TGTGTCTCAGGGTCCAGTTTTCCAGGAATCCCTTGGGCACTGTGTT [10277]  
Asi CCCGGCCTCT--CGTGTCTCAGGGTCCAGTTTTCCAGGAATCCCTTGGGCACTGTGTT [9716]  
Tgu CCGGGCTGCA----- [8010]  
Cli -----CGTGCCTCAGGGTCCAGTTTTCCAGGAATCCCTTAGGCGCTACGTT [10192]  
Gga CCTGGGCTGC--CGTGTCTCAGGGTCCAGTTTTCCAGGAATCCCTTAGGCGCTACGTT [9177]  
Xtr ACCAAGTCTC--CTATTCTCAAGGTCCAGTTTTCCAGGAATCCCTTGGGTGCTGTGGT [9860]  
Lch CCCAGACTGT--CTTGTCTCAGGGTCCAGTTTTCCAGGAATCCCTTGGGTGCTAAAAA [10649]  
Dre CCAGGGGGTC--CTCATCCCCGGGGTCCAGTTTTCCAGGAATCCCTTGGGCAATCGAAA [9862]

Hsa GGG-GATTTCCTGGAAATACTGTTCTTGAGGTCATGG--ATCCTCAGCTTTGAGAACTGAA [10220]  
Mmu GGG-GATTTCCTGGAAATACTGTTCTTGAGGTCATGG--ATCCCCAGCTCTGAGAACTGAA [10142]  
Mdo GGG-GATTTCCTGGAAATACTGTTCTTGAGGTCATGG--ATCCTCAGCTTTGAGAACTGAA [9678]  
Meu GGG-GATTTCCTGGAAATACTGTTCTTGAGGTCATGG--ATCCTCAGCTTTGAGAACTGAA [8294]  
Oan GGG-GATTTCCTGGAAATACTGTTCTTGAGGTCATGG--ACGCTCAGCTTTGAGAACTGAA [8988]  
Aca GGG-GATTTCCTGGAAATACTGTTCTTGGGGTCATGG----- [10267]  
Pbi GGG-GATTTCCTGGAAATACTGTTCTTGGGGTCATGG----- [10557]  
Cpi GGG-GATTTCCTGGAAATACTGTTCTTGAGGCCATGG--ATTCTCAGCTTTGAGAACTGAA [10935]  
Cmy GGG-GATTTCCTGGAAATACTGTTCTTGAGGCCATGG--ATTCTCAGCTTTGAGAACTGAA [10689]  
Psi GGG-GATTTCCTGGAAATACTGTTCTTGAGGCCATGG--ATTCTCAGCTTTGAGAACTGAA [9811]  
Asp -----ATTCTCAGCTTTGAGAACTGAA [9300]  
Ami GGG-GATTTCCTGGAAATACTGTTCTTGGGGCCGTGG--ATTCTTGGCTTTGAGAACTGAA [10334]  
Asi GGG-GATTTCCTGGAAATACTGTTCTTGGGGCCGTGG--ATTCTTGGCTTTGAGAACTGAA [9773]  
Tgu -----ATTCTCAGCTTTGAGAACTGAA [8032]  
Cli GGG-GATTTCCTGGAAATACTGTTCTTGAGGCCACGG--ATTCTCAGCTTTGAGAACTGAA [10249]  
Gga GGG-GATTTCCTGGAAATACTGTTCTTGGGGCCACGG--ATCCTCAGCTTTGAGAACTGAA [9234]  
Xtr GGG-GATTTCCTGGAAATACTGTTCTTGGGGTGTAGG--GTTCTTAGCTTTGAGAACTGAA [9917]  
Lch GGG-GATTTCCTGGAAATACTGTTCTTGGGGGCAAGG--ACTCCAGCTTTGAGAACTGAG [10706]  
Dre GGGGGATTTCCTGGAAATACTGTTCTTGGGGTGGGG--GCTCTTGGCTTTGAGAACTGAA [9920]

Hsa TTCCATGGGTTGTG-TCAGT-----GTCAGACCTCTGAAATTCAGTTCTTCAGCTGGGA [10273]  
Mmu TTCCATGGGTTATA-TCAAT-----GTCAGACCTGTGAAATTCAGTTCTTCAGCTGGGA [10195]  
Mdo TTCCATGGGTTGTC-TTTGT-----ATCAGACCTATGAAACTCAGTTCTTCAGCTGGAA [9731]  
Meu TTCCATGGGTTGTC-TTTGT-----ATCAGACCTATGAAACTCAGTTCTTCAGCTGGGA [8347]  
Oan TTCCACGGGTTGTG-ATTGCAACTCTGACAGACCCGTGGGGCTCAGTTCTTCAGCTGGGG [9047]  
Aca ----- [10267]  
Pbi ----- [10557]  
Cpi TTCCATGTGTTGTAATTGAATC-TCTGTGACACCCATGGGGCTCAGTTCTTCAGCTTGGA [10994]  
Cmy TTCCATGGGTTGTAATTGAATC-TCTGTGACACCCATGGGGCTCAGTTCTTCAGCTTGGA [10748]  
Psi TTCCACAGGTTGTAATTGAG-C-TGTGTGACACCTATGGGGCTCAGTTCTGACAGCTTGGA [9869]  
Asp TTCCATAGGTTGTAATTGAG-C-TCTGTGACACCTATGGGGCTCAGTTCTTCAGCTTGGA [9358]  
Ami TTCCATGGGTTGTAATTGAATC-TTGAACAGACCCATGGGGCTCAGTTCTTCAGCTTGGA [10393]  
Asi TTCCATGGGTTGTAATTGAATC-TTGAACAGACCCATGGGGCTCAGTTCTTCAGCTTGGA [9832]  
Tgu TTCCATGGGTTGTAATTGAATCTGCTGTGACACCCATGGGGCTCAGTTCTTCAGCTTGGA [8092]  
Cli TTCCATGGGTTGTAATTGAATTCGCTGTGACACCCATGGGGCTCAGTTCTTCAGCTTGGA [10309]  
Gga TTCCATGGGTTGTAATTGAATCCTTTGTGACACCCATGGGGCTCAGTTCTTCAGCTTGGA [9294]  
Xtr TTCCATAGGTTGTTAGAG-----GTTAGACCTATGGTGCTTAGTTCCATAGCTTGGA [9969]  
Lch TTCCATGAACTGTAATCAGTA-----CCCAG-CTCATGGGGTTCAGTTCTGTAGCTTGGA [10760]  
Dre TTCCAAGGGTGTCTGCTTTAT----ATTTCAG-CCCACGGAGTTCAGTTCTTAAGTTTGGA [9975]

|     |                                                                 |           |
|-----|-----------------------------------------------------------------|-----------|
| Hsa | TATCT--CACCTGGCACTGAGAACTGAATTCCATAGGCTGTGAGCTC----TAGCAA-TG    | [ 10326 ] |
| Mmu | TAGCT--CACCTGGCTCTGAGAACTGAATTCCATAGGCTGTGAGCTC----TAGCAGACG    | [ 10249 ] |
| Mdo | TATCT--CATCTGGCTCTGAGAACTGAATTCCATAGGCTGTGAGCTC----ATGCAAATG    | [ 9785 ]  |
| Meu | TATCT-----                                                      | [ 8352 ]  |
| Oan | TACCT--TGCTTGGCTCTGAGAACTGAATTCCATAGGCTGTGAGTTGA---TGAGGA-TG    | [ 9101 ]  |
| Aca | -----TGCTTAGCTCTGAGAACTGAATTCCATAGGCTTTAGAATAA---TTGAAA-CG      | [ 10316 ] |
| Pbi | -----TGCTTAGCTCTGAGAACTGAATTCCATAGGCTTTAGAAGAA---ATGAAA-CG      | [ 10606 ] |
| Cpi | TATCT--TGCTTGGCTTTGAGAACTGAATTCCATAGGCTTTAAAATA----ATGAAAACG    | [ 11048 ] |
| Cmy | TATCT--TGCTTGGCTTTGAGAACTGAATTCCATAGGCTTTAAAATA----ATGAAAACG    | [ 10802 ] |
| Psi | TATCT--TGCTTGGCTTTGAGAACTGAATTCCATAGGCTTTAAAATA----AGAAAAATG    | [ 9923 ]  |
| Asp | TATCT--TGCTTGGCTTTGAGAACTGAATTCCATAGGCTTTAAAATA----AGAAAAATG    | [ 9412 ]  |
| Ami | TATCT--TCCTTGGCTTTGAGAACTGAATTCCATAGGCTTTAAAAGA----CAAAAAAAG    | [ 10447 ] |
| Asi | TATCT--TCCTTGGCTTTGAGAACTGAATTCCATAGGCTTTAAAAGA----CAAAAAAAG    | [ 9886 ]  |
| Tgu | TATTT--TGCTTGGCTCTGAGAACTGAATTCCATAGGCGTTGAAGCCT---CCAAAA-TG    | [ 8146 ]  |
| Cli | TATTT--TACTTGGCTCTGAGAACTGAATTCCATAGGCATTAAGCCT---CTAAAAATG     | [ 10364 ] |
| Gga | TATTT--TGCTTGGCTTTGAGAACTGAATTCCATAGGCGTTAAAGCAT---CCAAAAATG    | [ 9349 ]  |
| Xtr | TCCCA-----                                                      | [ 9974 ]  |
| Lch | TGTTG--TGCTTGGCTGTGAGAACTGAATTCCATAGATGGTTGGAGTAGAATGGAAAACG    | [ 10818 ] |
| Dre | TGCAG--CACTTTTCCCTGAGAACTGAATTCCATAGATGGTGTTCAT----GAAAAGTTC    | [ 10029 ] |
|     |                                                                 |           |
| Hsa | CCCTGTGGACTCAGTTCTG-GTG-CCCGGCAGTG-----                         | [ 10358 ] |
| Mmu | CCCTAGGGACTCAGTTCTG-GTG-CCCGGCTGTG-----                         | [ 10281 ] |
| Mdo | CCCTAGGAAGTCAGTTCTG-GAG-TCCGGTGACC-----                         | [ 9817 ]  |
| Meu | -----                                                           | [ 8352 ]  |
| Oan | CCCTAGGGATTTCAGTTCCA-CAG-CCCAGCAACC-----                        | [ 9133 ]  |
| Aca | CCCCGTGGATTTCAGTTCTA-CAG-CTAGGCAGCA--GTTCCAAGCTTTGAGAACTGGTTT   | [ 10372 ] |
| Pbi | CCCCGTGGATTTCAGTTCTA-CAG-CTAGACAGCT--GTCCCAGGCTCTGAGAACTGGTTT   | [ 10662 ] |
| Cpi | CCCTGTGGCTTCAGTTCTG-TAG-CTGGGTAGCA--GTTCCCAGCTCTGAGAACTGAATT    | [ 11104 ] |
| Cmy | CCCTGTGGATTTCAGTTCTG-TAG-CTGGGTAGCA--GTTCCCAGCTCTGAGAACTGAATT   | [ 10858 ] |
| Psi | CCCTGTGGATTTCAGTTCTG-TAG-CTAGGCAGCA--GTTCCCAGCTCTGAGAACTGAATT   | [ 9979 ]  |
| Asp | CCCTGTGGATTTCAGTTCTG-TAG-CTAGGTAGCA--GTTCCCAGCTCTGAGAACTGAATT   | [ 9468 ]  |
| Ami | CCCTATGGATTTCAGTTCTG-TAG-CTGGGCGGCA--GTTCCCAGCTCTGAGAACTGAATT   | [ 10503 ] |
| Asi | CCCTATGGATTTCAGTTCTG-TAG-CTGGGCGGCA--GTTCCCAGCTCTGAGAACTGAATT   | [ 9942 ]  |
| Tgu | CCCTATGGATTTCAGTTCTG-CAG-CTGGGCAGCA--GTTCCCAGCTCTGAGAACTGAATT   | [ 8202 ]  |
| Cli | CCCTATGGATTTCAGTTCTG-CAG-CTGGGCAGCA--GTTCCCAGCTCTGAGAACTGAATT   | [ 10420 ] |
| Gga | CCCTATGGATTTCAGTTCTG-CAG-TTGGGCAGCA--GTTCCCAGCTCTGAGAACTGAATT   | [ 9405 ]  |
| Xtr | -----GGGCCCGGCTCTGAGAACTGAATT                                   | [ 9998 ]  |
| Lch | GTCTGTGGATTTCAGTTCTTTTCAG-TCTGGTGACC--GGTCCCAGGCTCTGAGAACTGAATT | [ 10875 ] |
| Dre | ATCTATGGGCTCAGTTCTTCTGG-CAATCTGTTT-----                         | [ 10062 ] |
|     |                                                                 |           |
| Hsa | -----                                                           | [ 10358 ] |
| Mmu | -----                                                           | [ 10281 ] |
| Mdo | -----                                                           | [ 9817 ]  |
| Meu | -----                                                           | [ 8352 ]  |
| Oan | -----                                                           | [ 9133 ]  |
| Aca | TCGTGGACTGGTTTCCATTTAGTCTTCTCAGTCCATAATGCTCAGTTTTCAGCTTGGCT     | [ 10432 ] |
| Pbi | TGATGGACTAGTTTCCCTTTTCAGTTTTTTTCAGTCCATAATATCCAGTTCTCTAGCTTGGCT | [ 10722 ] |
| Cpi | CCATGGACTGGTTTTCAGTTCTGTATCTTTCAGTCCATGGTAGTCAGTTCTCTAGCTTGGCT  | [ 11164 ] |
| Cmy | CCATGGACTGGTTTTCAGTTCTGTATCTTTCAGTCCATGGTAGTCAGTTCTCTAGCTTGGCT  | [ 10918 ] |
| Psi | CCATGGACTGGTTTTCAGTGCTGTATCTTTCAGTTCATGGTAGTCAGTTCTCTAGCTTGGCT  | [ 10039 ] |
| Asp | CCATGGACTGGTTTTCAGTGCTGTATCTTTCAGTTCATGGTAGTCAGTTCTCTAGCTTGGCT  | [ 9528 ]  |
| Ami | CCATGGACTGGTTCCCTCTTCATATCTTTCAGTCCATAGTAGTCAGTTCTCTAGCTTGGCT   | [ 10563 ] |
| Asi | CCATGGACTGGTTCCCTCTTCATATCTTTCAGTCCATAGTAGTCAGTTCTCTAGCTTGGCT   | [ 10002 ] |
| Tgu | CCATGGACTGGTTCCAGTTCCATGTGTTTCAGTCCATGGTATTTCAGTTCTCTAGCTTGGCT  | [ 8262 ]  |
| Cli | CCATGGACTGGTTCCAGTTCCATGTGTTTCAGTCCATGGTATTTCAGTTCTCTAGCTTGGCT  | [ 10480 ] |
| Gga | CCATGGACTGGTTTCAATTCCATGCGTTTCAGTCCATGGTATTTCAGTTCTCTAGCTTGGCT  | [ 9465 ]  |
| Xtr | CCATGGACTGTTCCACTCACAGCACCCCTCAGTCCACAGTGTTCAGTGCTCCAGTCTGGCT   | [ 10058 ] |

|     |                                                               |         |
|-----|---------------------------------------------------------------|---------|
| Lch | CCATGGGCTGGTCCAA-TCAGAACTCTTCAGTCCATAGTAGTCAGTTCTCCAGCTTGGCT  | [10934] |
| Dre | -----                                                         | [10062] |
| Hsa | -----TATAAATCTAGTGGAAACATTTCTGCACAAACTAGATTCTG--GACACCAGTGTG  | [10411] |
| Mmu | -----TATGAATCTAGTGGAAACATTTCTGCACAAACTAGATG-TT--GATGCCAGTGTG  | [10333] |
| Mdo | -----TATGAATCTAGTGGAAACATCTCCGCACAAACTAGACTACT--GAAACCAGTGTG  | [9870]  |
| Meu | -----TATGAATCTAGTGGAAACATTTCTGCACAAACTATACTACT--GAAACCAGTGTG  | [8405]  |
| Oan | -----TGGGAATCCAGCGGAATCACCTCTGCACAAACTCGTCTTCT--GAA-CCAGTGTG  | [9185]  |
| Aca | GCA--TATGAATCTAGTGGAAATCACTTCCGCACAAACTAGATGAAT--GAAACCAGTGTG | [10488] |
| Pbi | GCA--TATGAATCTAGTGGAAATCACTTCTGCACAAACTAGAGGATT--GAAACCAGTGTG | [10778] |
| Cpi | GTA--TATGAATCTAGTGGAAATCACTTCTGCACAAACTCGACTACT--GAAATCAGTGTG | [11220] |
| Cmy | GTA--TATGAATCTAGTGGAAATCACTTCTGCACAAACTCGACTACT--GAAATCAGTGTG | [10974] |
| Psi | GTA--TATGAATCTAGTGGAAATCACTTCTGCACAAACTCGACTTTT--GAAATCAGTGTG | [10095] |
| Asp | GTA--TATGAGTCTAGTGGAAATCACTTCTGCACAAACTCGACTATT--GAAATCAGTGTG | [9584]  |
| Ami | GTA--TATGAATCTAGTGGAAATCACTTCTGCACAAACTCGACTATT--GAAATCAGTGTG | [10619] |
| Asi | GTA--TATGAATCTAGTGGAAATCACTTCTGCACAAACTCGACTATT--GAAATCAGTGTG | [10058] |
| Tgu | GCA--TATGAATCTAGTGGAAATCACTTCTGCACAAACTTGACTACT--GAAATCAGTGTG | [8318]  |
| Cli | GCA--TATGAATCTAGTGGAAATCACTTCTGCACAAACTTGACTACT--GAAATCAGTGTG | [10536] |
| Gga | GCA--TATGAATCTAGTGGAAATCACTTCTGCACAAACTTGACTACT--GAAATCAGTGTG | [9521]  |
| Xtr | GCC-----                                                      | [10061] |
| Lch | GCA--TATGAATCTAGCGGAATCACTTCTGCACAAACTCGACTATTTGCAAAACAGTGTG  | [10992] |
| Dre | -----                                                         | [10062] |
| Hsa | CGGAAATGCTTCTGCTACATTTTT--GTCTTTTGAGGCAAAGTTCTGAGACACTCCGACT  | [10469] |
| Mmu | CGGAAATGCTTCTGCTACATTTGT--GTCTTTTGAGACAAAGTTCTGAGACACTCCGACT  | [10391] |
| Mdo | CGGAAGTGCTTCTGCTACATTTTT--GCCGTGCGAGGCAAAGTTCTGGGACACTCAGACT  | [9928]  |
| Meu | CGGAAGTGCTTCTGCTACATTTTT--GCCGTGCGAGGCAAAGTTCTGTGACGCTCAGACT  | [8463]  |
| Oan | CGGAGATGCTTCCGCCGCACTTCTC--GTCTTTTGAGGCAAAGTTCTGTGACACTCAGACT | [9243]  |
| Aca | CGGAAATGCTTCTGCTACATTTTT--GTCTCTGGAAGCAAAGTTCTGTGACACTCCGACT  | [10546] |
| Pbi | CGGAAATGCTTCTGCTACATTTTT--GTTTCTGGAAGCAAAGTTCTGTGACACTCCGACT  | [10836] |
| Cpi | CGGAAATGCTTCTGCTACATTTTT--GTCTCTTGAAGCAAAGTTCTGTGACACTCAGACT  | [11278] |
| Cmy | CGGAATTGCTTCTGCTACATTTTT--GTCTCTTGAAGCAAAGTTCTGTGACACTCAGACT  | [11032] |
| Psi | CGGAAATGCTTCTGCTACATTTTT--GTCTCTTGAAGCAAAGTTCTGTGACACTCAGACT  | [10153] |
| Asp | CGGAAATGCTTCTGCTACATTTTT--GTCTCTTGAAGCAAAGTTCTGTGACACTCAGACT  | [9642]  |
| Ami | CGGAAATGCTTCTGCTACATTTTT-----                                 | [10643] |
| Asi | CGGAAATGCTTCTGCTACATTTTT--GTCCCTTGAAGCAAAGTTCTGTGACACTCCGACT  | [10116] |
| Tgu | CGGAAATGCTTCTGCTACATTTTT--GCCTCCGGAAGCAAAGTTCTGTGACACTCCGACT  | [8376]  |
| Cli | CGGAAATGCTTCTGCTACATTTTT--GCCTCCGGAAGCAAAGTTCTGTGACACTCCGACT  | [10594] |
| Gga | CGGAAATGCTTCTGCTACATTTTT--GTCTCCTGAAGCAAAGTTCTGTGACACTCAGACT  | [9579]  |
| Xtr | -----GTCTTTTAAATCAAAGTTCTGTGACACTTAGACT                       | [10095] |
| Lch | CGGAAGTGCTTCTGCTACATTTTT--GTCTCTTAAAGCAAAGTTCTGTATCACTTAGACT  | [11050] |
| Dre | -----GGCTTTCCAAGTAAAGTTCTGTGATACACTCCGA                       | [10096] |
| Hsa | CTGAGTATGATAGAAGTCAGTGCCTACAGAACTTTGTCTCTAGAGG--AGCATTTGAGG   | [10527] |
| Mmu | CTGAGTATGATAGAAGTCAGTGCCTACAGAACTTTGTCTCTAGAGG--AGCATTTGAGG   | [10449] |
| Mdo | CTGATTAGGATAGAAGTCAGTGCCTACAGAACTTTGTCTCCGGAGG-----           | [9975]  |
| Meu | CTG-TTAGCCAAGAAGTCAGTGCCTACAGAACTTTGTCTCCGGGGG--AGCATTTGAGG   | [8520]  |
| Oan | CTGATTATGATAGAAGTCAGTGCCTACAGAACTTTGTCTCCAGAGG-----           | [9290]  |
| Aca | CTGATTATGATAGAAGTCAGTGCCTACAGAACTTTGTCTCCGGGGG--AGCGCTTGAGG   | [10604] |
| Pbi | CTGATTATAATAGAAGTCAGTGCCTACAGAACTTTGTCTCCAGGGG--AGCGCTTGAGG   | [10894] |
| Cpi | CTGATTATGATAGAAGTCAGTGCCTACAGAACTTTGTCTTTGGGGG--AGCATTTGAGG   | [11336] |
| Cmy | CTGATTATGATAGAAGTCAGTGCCTACAGAACTTTGTCTTTGGGGT--AGCGTTTGAGG   | [11090] |
| Psi | CTGATTATGATAGAAGTCAGTGCCTACAGAACTTTGTCTCTGGGGG--AGCGTTTGAGG   | [10211] |
| Asp | CTGATTACGATAGAAGTCAGTGCCTACAGAACTTTGTCTCTGGGGG-----           | [9689]  |
| Ami | -----GGCCTTTGAGG                                              | [10654] |
| Asi | CTGAGTAC-ATAGCAGTCAGTGCCTACAGAACTTTGTCTCTGGGGG-----           | [10162] |
| Tgu | CTGGGTACGATAGCAGTCAGTGCCTACAGAACTTTGTCTCCGGCGG-----           | [8423]  |

```
Cli CTGGGTACGATAGCAGTCAGTGCACACTACAGAACTTTGTCTCCGGCGG--AGCGCCCGGGG [10652]
Gga CTGGTTACGATAGCAGTCAGTGCACACTACAGAACTTTGTCTCCGGGGG----- [9626]
Xtr CTGAATATGATAGCAGTCAGTGCACACTACAGAACTTTGTTTTGGGAGT--AGCGTTTGAGG [10153]
Lch CTGAGTACTATAGAAGTCAGTGCACACTACAGAACTTTGTTTTGGGAGT--AGCACTTGAGG [11108]
Dre CTCTGAATGTTTGCAGTCAGTGCATTACAGAACTTTGTTTTGGGAGT----- [10143]

Hsa TGAAGTTCTGTTATACACTCAGGCTGTGGCTCTCTGAAAGTCAGTGCATCACAGAACTTTT [10587]
Mmu TGAAGTTCTGTTATACACTCAGGCTGTGGCTCT--GAAAGTCAGTGCATCACAGAACTTTT [10507]
Mdo ----- [9975]
Meu TGAAGTTCTGTTATACACTCAGACTGTGGCTCTCTGAAAGTCAGTGCATCACAGAACTTTT [8580]
Oan ----- [9290]
Aca TGAAGTTCTGTTATACACTCTGACTGTGGCTATGTGGAAGTCAGTGCATCACAGAACTTTT [10664]
Pbi TGAAGTTCTGTTATACACTTTGACTGTGGCTACATGGAAGTCAGTGCATCACAGAACTTTT [10954]
Cpi TGAAGTTCTGTTATACACTCTGACTGTGGCTACGTGGAGGTCAGTGCATCACAGAACTTTT [11396]
Cmy TGAAGTTCTGTTATACACTCCGACTGTGGCTATGTGGAGGTCAGTGCATCACAGAACTTTT [11150]
Psi TGAAGTTCTGTTATACACTCCGGCCGTGGCTACGAGG--GGTCAGTGCATCACAGAACTTTT [10270]
Asp ----- [9689]
Ami CGGAGTTCTGTATACACTCCGACTGTG--CTACCTGG--GGTCAGTGCATCACAGAACTTTT [10712]
Asi ----- [10162]
Tgu ----- [8423]
Cli CGAGGTTCTGTCTACACTCCGGCTGTAGCTACA--GACAGTCAGTGCATCACAGAACTTTG [10711]
Gga ----- [9626]
Xtr TGAAGTTCTGTTATACACTCCGGCTGTGAGTAAGTGGAAAGTCAGTGCATCACAGAACTTTT [10213]
Lch TGAAGTTCTGTTATACACTCCGGCTGTGAGTAACGAGAAGTCAGTGCATCACAGAACTTTT [11168]
Dre ----- [10143]

Hsa GTCTCGAAAGCTT--CCCCCGGCCAGGTTCTGTGATACACTCCGACTCGGGCTCTGGAG [10645]
Mmu GTCTCGAAAGCTT--CCCCGGCCTAGGTTCTGTGATACACTCCGACTCGGGCTCTGGAG [10565]
Mdo -----TCCCCGGGCCAGGTTCTGTGATACACTCCGACTTAGACTCTGGAG [10020]
Meu GTCTCGAAAGCTT--TCCCCAGCCCAGGTTCTGTGATACACTCCGACTTAGACTCTGGAG [8638]
Oan ----- [9290]
Aca GTCTCGAGAGCTT----- [10677]
Pbi GTCTCGAGAGCTT----- [10967]
Cpi GTCTCGAGAGCTT--CTCTCGGCCAGGTTCTGTGGTACACTTGGACTTGGACTCTGGAG [11454]
Cmy GTCTCGAGAGCTT--CTCTCGGCCAGGTTCTGTGGTACACTTGGACTTGGACTCTGGAG [11208]
Psi GTCTCGAGAGCTT--CTCTCGGCTCAGGTTCTGTGGTACACTTGGACTCGGACTCTGGAG [10328]
Asp -----CTCTCGGCCAGGTTCTGTGGTACACTTGGACTCGGACTCTGGAG [9734]
Ami GTCTCGAGAGCTT--CTCTCAGCTCAGGTTCTGTGGTACACTTGGACTCGGACTCTGGAG [10770]
Asi -----CTCTCAGCCCAGGTTCTGTGGTACACTTGGACTCGGACTCTGGAG [10207]
Tgu ----- [8423]
Cli GTCCCGGGAGCTC----- [10724]
Gga ----- [9626]
Xtr GTCTCGAGGGCTT----- [10226]
Lch GTCTCGAGAGCTT----- [11181]
Dre -----CACCTGGCTCAAGTTCTGTGATACACTCAGACTTTGAATCAGTGG [10188]

Hsa CAGTCAGTGCATGACAGAACTTGGGCCCGGAAGGAC--TCCCCATGGCCCTGTCTCCCAA [10703]
Mmu CAGTCAGTGCATGACAGAACTTGGGCCCGGTAGGAC--TTCTCAATGCCCTGTCTCCCAA [10623]
Mdo CAGTCAGTGCATGACAGAACTTGGGCTTGGGTGGAC--CCTCCGGGGCCCTTCTCCCAA [10078]
Meu CAGTCAGTGCATGACAGAACTTGGGTTTGGGTGGAC--GGCCTGGAGCCCCCTCTCCCAA [8696]
Oan -----CCCTCGGCGCCCCCTCTCCCAA [9312]
Aca -----ACTCTCTTTCCCTCTCTCCCAA [10699]
Pbi -----ACTCTTCTCCTTTCTCTCCCAA [10989]
Cpi CAGTCAGTGCATGACAGAACTTGGGTTTGGATGGAC----- [11490]
Cmy CAGTCAGTGCATGACAGAACTTGGGTTTGGATGGAC--TCTGCTCCCCACTCTCTCCCAA [11266]
Psi CAGTCAGTGCATGACAGAACTTGGGCTTGGACGGAC----- [10364]
Asp CAGTCAGTGCATGACAGAACTTGGGCTTGGACGGAC----- [9770]
```

---

---

|     |                                                                |         |
|-----|----------------------------------------------------------------|---------|
| Ami | CAGTCAGTGCATGACAGAACTTGGGTTTGGATGGAC--TCTGCCCCCACTCTCTCCCAA    | [10828] |
| Asi | CAGTCAGTGCATGACAGAACTTGGGTTTGGATGGAC--TCTGCCCCCACTCTCTCCCAA    | [10265] |
| Tgu | -----                                                          | [8423]  |
| Cli | -----                                                          | [10724] |
| Gga | -----                                                          | [9626]  |
| Xtr | -----GTCTACTCTTTCTCTCTCCCAA                                    | [10248] |
| Lch | -----GACGGAGTTCTCTGTCTCCCAA                                    | [11203] |
| Dre | TAGTCAGTGCATGACAGAACTTTGGCCCGGACGGAC--AGTCCATCTCCGTCTCTCCCAA   | [10246] |
|     |                                                                |         |
| Hsa | CCCTTGTACCAGTGCTG---GGC-TCAGACCCTGGTACAG-GCC-TGGGGG-ACAGGGAC   | [10756] |
| Mmu | CCCTTGTACCAGTGCTG---TGCCTCAGACCCTGGTACAG-GCC-TGGGGG-ATAGGGAC   | [10677] |
| Mdo | CCCTTGTACCAGAGTCC----ATCAGAGACCC-GGTACGGGCTG-TGGGGG-ACGGGGAG   | [10131] |
| Meu | CCCTCGTACCAGAGTCC----ATCAGAGACCC-GGTACGGGCTG-TGGGGG-ATGGGGAG   | [8749]  |
| Oan | CCCTTGTACCAGAGCAT---AAACTGAACCCCTGGTACGGGGCCGTGGGAG-AGGGGGAG   | [9368]  |
| Aca | CCCTTGTACCAGTGCCA-ACTGTAGTCTCTACTGGTACAGAGGA-TGGAAG-GGTGGG-C   | [10755] |
| Pbi | CCCTTGTACCAGTGTC-A-GCTGTTGCACCTACTGGTACAGAGGA-TGGAAG-GGAGAGTG  | [11046] |
| Cpi | -----                                                          | [11490] |
| Cmy | CCCTTGTACCAGTGTCATGCTGCAGCGAACCCCTGGTGCAGAGGA-TGGATG-AGAAGGGG  | [11324] |
| Psi | -----                                                          | [10364] |
| Asp | -----                                                          | [9770]  |
| Ami | CCCTTGTACCAGTGTCATGTTACTG-GAACCCCTGGTACAGAGGA-TGGATG-AGAAGGAG  | [10885] |
| Asi | CCCTTGTACCAGTGTCATGTTACTG-GAACCCCTGGTACAGAGGA-TGGATG-AGAAGGAG  | [10322] |
| Tgu | -----                                                          | [8423]  |
| Cli | -----                                                          | [10724] |
| Gga | -----                                                          | [9626]  |
| Xtr | CCCTTGTACCAGAGTGA---TAATGGGAACCTCTGGTACAGAGGA-TGGCTG-AAAGGAAG  | [10303] |
| Lch | CCCTTGTACCAGTGTCG--GATTAGAGAACACTGGTACGGAGGA-GGGGGG-AGAGAGAG   | [11259] |
| Dre | TCCTTGTACCAGTGTC--GATTTACAGATGACGCTGGACGGGG-TTTGGG-GGGGGCTG    | [10302] |
|     |                                                                |         |
| Hsa | CTGGGGA--CTCACAGCTGCCAGTGTCAATTTTTGTGATCTGCAGCT-AGTATTCTCACTC  | [10813] |
| Mmu | TTGGGAA-----                                                   | [10684] |
| Mdo | TCGGGGC--CTCACAGCTGCCAGTGTCAATTTTTGTGATCTGCAGCT-AGTATTCTGGCTT  | [10188] |
| Meu | CCAGGTG--CTCACAGCTGCCTGTGTCAATTTTTGTGATCTGCAGCT-AGTATTCTGACTT  | [8806]  |
| Oan | CCGGGGC--CTCACAGCTGCCAGTGTCAATTTTTGTGATCTGCAGCTTAGTACTCTGGCTC  | [9426]  |
| Aca | CTGCAGA--TTCACAGCCGTCAGTGTCAATTTTTGTGATTTGCAGCT-AGTAATCCTGGCC  | [10812] |
| Pbi | GTTTCAGA--CTCACAGCTGCCAGTGTCAATTTTTGTGATTTGCAGCT-AGTAATCCTGGCC | [11103] |
| Cpi | -----CGTGCAGCTGCCAGTGTCAATTTTTGTGATTTGCAGCT-AGTAATCTGGGTC      | [11540] |
| Cmy | GGGTGGG-----                                                   | [11331] |
| Psi | -----                                                          | [10364] |
| Asp | -----                                                          | [9770]  |
| Ami | GCGTGGG--CTCGCGGCTGCCGGGGCATTTTTTGTGATTTGCAGCT-CGTGGTCTGGGTC   | [10942] |
| Asi | GCGTGGG-----                                                   | [10329] |
| Tgu | -----CTCGCAGCTGCCGGCGTCAATTTTTGTGATTTGCAGCT-AGTAATCTGGCTC      | [8473]  |
| Cli | -----CTCGCAGCTGCCGGCGTCAATTTTTGTGATTTGCAGCT-AGTAATCTGGCTC      | [10774] |
| Gga | -----                                                          | [9626]  |
| Xtr | CAGTGGA--ATCACGGCTGCCCTTGTCAATTTTTGTGATTTGCAGCT-TGTAATTTTGGTC  | [10360] |
| Lch | CGCTCTC--TTCATGGCTGCCAGTGTCAATTTTTGTGATTTGCAGCT-AGTAATCTTCAGT  | [11316] |
| Dre | AGGGAGG--AGCACACCTCCCAGTGTCAATTTTTGTGATTTGCAGCT-AGTAGTCTGGGTC  | [10359] |
|     |                                                                |         |
| Hsa | -CAGTTGCATAGTACAAAAAGTGATCATTTGGCAGGTGTGGC--AGCGGTGGCCAGTGTCA  | [10870] |
| Mmu | -----AGCGGTGGCCGGTGTCA                                         | [10701] |
| Mdo | -CAGTTGCATAGTACAAAAAGTGATCATTTGGCAGGTGTGGC--AGCGGTGGCCGGTGTCA  | [10245] |
| Meu | -CAGTTGCATAGTACAAAAAGTGATCATTTGGCAGGTGTGGC-----                | [8846]  |
| Oan | -CAGTTGCATAGTACAAAAAGTGATCATTTGGCAGGTGTGGC--AGCGGTGGCCAGTGTCA  | [9483]  |
| Aca | -CAGTTGCATAGTACAAAAAGTGATCATTTGGCCGCTGTGCC--AGCGGTGGCCAGTGTCA  | [10869] |
| Pbi | -CAGTTGCATAGTACAAAAAGTGATCATTTGGCCACTGTGCC--AGCAGTTGCCAGTGTCA  | [11160] |
| Cpi | -CAGTTGCATAGTACAAAAAGTGAGCATTTGGCAGCCGTGCC--AGCGGTGGCCAGTGTCA  | [11597] |

```
Cmy -----AGCGGTTGCCAGTGTCA [11348]
Psi -----AGCGGTTGCCAGTGTCA [10381]
Asp -----AGCGGTTGCCAGTGTCA [9787]
Ami -CAGTTGCATAGTCACAAAAGTGATCGTTCGGCGGCCGCGCC--AGCGGTTGCCAGTGTCA [10999]
Asi -----AGCGGTTGCCAGTGTCA [10346]
Tgu -CAGTTGCATAGTCACAAAAGTGATCGTTGGCAGCCGTGCC--AGCGGTTGCCAGTGTCA [8530]
Cli -CAGTTGCATAGTCACAAAAGTGATCGTTGGCAGCCGTGCC--AGCGGTTGCCAGTGTCA [10831]
Gga -----AGCGGTTGCCAGTGTCA [9643]
Xtr TCAGTTGCATAGTCACAAAAGTGATCATGGGCAGGTGGGGC--AGCGGTTGCCAGTGTCA [10418]
Lch CCAGTTGCATAGTCACAAAAGTGATCATTGGCAGCTGTGTC--AGCGGTTGCCAGTGTCA [11374]
Dre -CAGTTGCATAGTCACAAAATGATCATTGGTAGGTGTGAG--AGCGGTTGCCAGTGTCA [10416]

Hsa TTTTTGTGATGTTGCAGCTAGTAATATGAGCCCAGTTGCATAGTCACAAAAGTGATCATT [10930]
Mmu TTTTTGTGACGTTGCAGCTAGTAATATGAGCCCAGTTGCATAGTCACAAAAGTGATCATT [10761]
Mdo TTTTTGTGATGTTGCAGCTAGTAATATGAGCCCAGTTGCATAGTCACAAAAGTGATCATT [10305]
Meu ----- [8846]
Oan TTTTTGTGATGTTGCAGCTAGTAATATGAGCCCAGTTGCATAGTCACAAAAGTGATCATT [9543]
Aca TTTTTGTGATGTTGCAGCTAGTAATATAAGCCAAGTTGCATAGTCACAAAAGTGATCATT [10929]
Pbi TTTTTGTGATGTTGCAGCTAGTAATATAAGCCCAGTTGCATAGTCACAAAAGTGATCATT [11220]
Cpi TTTTTGTGATGTTGCAGCTAGTAATATGAGCCCAGTTGCATAGTCACAAAAGTGATCATT [11657]
Cmy TTTTTGTGATGTTGCAGCTAGTAATATGAGCCCAGTTGCATAGTCACAAAAGTGATCATT [11408]
Psi TTTTTGTGATGTTGCAGCTAGTAATATGAGCCCAGTTGCATAGTCACAAAAGTGATCATT [10441]
Asp TTTTTGTGATGTTGCAGCTAGTAATATGAGCCCAGTTGCATAGTCACAAAAGTGATCATT [9847]
Ami TTTTTGTGATGTTGCAGCTAGTAATATGAGCCCAGTTGCATAGTCACAAAAGTGATCATT [11059]
Asi TTTTTGTGATGTTGCAGCTAGTAATATGAGCCCAGTTGCATAGTCACAAAAGTGATCATT [10406]
Tgu TTTTTGTGATGTTGCAGCTAGTAATATGAGCCCAGTTGCATAGTCACAAAAGTGATCATT [8590]
Cli TTTTTGTGATGTTGCAGCTAGTAATATGAGCCCAGTTGCATAGTCACAAAAGTGATCATT [10891]
Gga TTTTTGTGATGTTGCAGCTAGTAATATGAGCCCAGTTGCATAGTCACAAAAGTGATCATT [9703]
Xtr TTTTTGTGATGTTGCAGCTAGTAATATGAGCCCAGTTGCATAGTCACAAAAGTGATCATT [10478]
Lch TTTTTGTGATGTTGCAGCTAGTAATATGAGCCCAGTTGCATAGTCACAAAAGTGATCATT [11434]
Dre TTTTTGTGATGTTGCAGCTAGTTATATGAGCCCAGTTGCATAGTCACAAAAGTGATCATT [10476]

Hsa GGAAACTGTGAC--TGTATGCTGTTAATGCTAATCGTGATAGGGGTTTTT-----GCC [10981]
Mmu GGAAACTGTGAC--TGTATGCTGTTAATGCTAATCGTGATAGGGGTTTTG-----GCC [10812]
Mdo GGAAACTGTGAC--TATATGTTGTTAATGCTAATCGTGATAGGGGTTTTTCTTTTTTGACT [10363]
Meu -----TATATGTTGTTAATGCTAATCGTGATAGGGGTTTGTCTTTTTTCACT [8892]
Oan GGAAACTGTGAC--CGCAGGTCGTTAATGCTAATCGTGATAGGGGTTTTTCT-----CTG [9595]
Aca GGAAACTGTGAC--CACACGTTGTTAATGCTAATCGTGATAGGGGTTTTT-----ATC [10980]
Pbi GGAAACTGTGAC--CATACTGTTAATGCTAATCGTGATAGGTGTTTT-----ATC [11270]
Cpi GGAAACTGTGAC--TGTATGTTGTTAATGCTAATCGTGATAGGGGTTTTT-----ACC [11708]
Cmy GGAAACTGTGAC--TGTATGTTGTTAATGCTAATCGTGATAGGGGTTTTT-----ACC [11459]
Psi GGAAACTGTGAC--TGTATGTTGTTAATGCTAATCGTGATAGGGGTTTTT-----ACC [10492]
Asp GGAAACTGTGAC--TGTATGTTGTTAATGCTAATCGTGATAGGGGTTTTT-----ACC [9898]
Ami GGAAACTGTGAC--TGTATGTTGTTAATGCTAATCGTGATAGGGGTTTTT-----ACC [11109]
Asi GGAAACTGTGAC--TGTATGTTGTTAATGCTAATCGTGATAGGGGTTTTT-----ACC [10456]
Tgu GGAAACTGTGAC--TGTATGTTGTTAATGCTAATCGTGATAGGGGTTTTT-----ACC [8641]
Cli GGAAACTGTGAC--TGTATGTTGTTAATGCTAATCGTGATAGGGGTTTTT-----ACC [10942]
Gga GGAAACTGTGAC--TGTATGTTGTTAATGCTAATCGTGATAGGGGTTTTT-----ACC [9754]
Xtr GGAAACTGTGAC--TGCACAGTATTAATGCTAATCGTGATAGGGGTTTTTT-----AAT [10530]
Lch GGAAACTGTGAC--TGTACGTTGCTAATGCTAATCGTGATAGGGGTTTTTT-----GAC [11485]
Dre GGAAACTGTATC--GGTGCAGGTTAATGCTAATCGTGATAGGGGTTTT-----AGT [10525]

Hsa TCCAAGTACTCCTACA-TATTAGCATTAACAGTGTATGATG----- [11022]
Mmu TCTGACTGACTCCTACC-TGTTAGCATTAACAGGACACAAGG----- [10853]
Mdo TCGAAGTACTCCTACA-TGTTAGCATTAACAGTATATGGCC----- [10404]
Meu TCTAAGTACTCCTACA-TGTTAGCATTAACACTATATGGCC----- [8933]
Oan TCTGACTGACCCCTGCC-CGTTAGCATTAGCAACGTGCGGCC----- [9636]
```



|     |                                                                |         |
|-----|----------------------------------------------------------------|---------|
| Aca | TCTGACTGACTCCTACA-TGTTAGCATTAAAGAATGTGTAGTG--CAGAAGGTGTTTATGC  | [11037] |
| Pbi | TCTGATCAACTCCTACA-TGTTAGCATTAAATAGGGTGTGGTG--CAGACAGTGTTAATGC  | [11327] |
| Cpi | TATGACTGACTCCTACA-TGTTAGCATTAAACTGTATGATG--CAGAAAGTGTTAATGC    | [11765] |
| Cmy | TATGACTGACTCCTACA-TGTTAGCATTAAACTGTATGATG--CAGAAAGTGTTAATGC    | [11516] |
| Psi | TATGACTGACTCCTACA-TGTTAGCATTAAACTGTATGATG--CAGGAAGTGTTAATGC    | [10549] |
| Asp | TATGACTGACTCCTACA-TGTTAGCATTAAACTGTATGATG--CAGGAAGTGTTAATGC    | [9955]  |
| Ami | TCTGACTGACTCCTACA-TGTTAGCATTAGCACTGTATGATG-----                | [11150] |
| Asi | TCTGACTGACTCCTACA-TGTTAGCATTAGCACTGTATGATG-----                | [10497] |
| Tgu | TATGACTGACTCCTACA-CGTTAGCATTAAACTGTATCTCT-----                 | [8682]  |
| Cli | TCTGACTGACTCCTACA-TATTAGCATTAAACTGTATCATG-----                 | [10983] |
| Gga | TCTGAATGACTCCTACA-TGTTAGCATTAAACTGTACCATG-----                 | [9795]  |
| Xtr | ACATATTGACTCCTACA-TGTTAGCATTATTATCATGTGGTT-----                | [10571] |
| Lch | TTTAGCTAACTCCTACA-TATTAGCATTAAACTGTATATGA-----                 | [11526] |
| Dre | GCTGATGAACACCTATGCTGTTAGCATTAACTCTTGCGCTAGT-----               | [10567] |
|     |                                                                |         |
| Hsa | -----                                                          | [11022] |
| Mmu | -----                                                          | [10853] |
| Mdo | -----                                                          | [10404] |
| Meu | -----                                                          | [8933]  |
| Oan | -----                                                          | [9636]  |
| Aca | TCCTTACGTCGGGAGTTTGAGATCTGATGCAACTCCTCTCCTGGTAGCATTGACTCTTAC   | [11097] |
| Pbi | TACTCATGTTGGGAGTTTGA-AATAAAGTCACTCCTCTTCCAGTAGCATTACTCTTAC     | [11386] |
| Cpi | TACTCATGTTAGGGGTGTGA--AATGAAGTAGCCCCCTTGCCCTGGTAGCATTGGCCCTTAC | [11823] |
| Cmy | TACTCATGTTAGGGGTGTGA--AGTGAAGTAGCTCCTTGCCCTGGTAGCATTGGCCCTTAC  | [11574] |
| Psi | TACTCATGTTAGGGGTGTGG--AATGAAGTGCCTCCTAGCGGGGTAGCATTGACCCTTAC   | [10607] |
| Asp | TACTCATGTTAGGGGCGTGG--AATGAAGTGCCTCCTGGCAGGGTAGCATTGGCCCTTAC   | [10013] |
| Ami | -----                                                          | [11150] |
| Asi | -----                                                          | [10497] |
| Tgu | -----                                                          | [8682]  |
| Cli | -----                                                          | [10983] |
| Gga | -----                                                          | [9795]  |
| Xtr | -----                                                          | [10571] |
| Lch | -----                                                          | [11526] |
| Dre | -----                                                          | [10567] |
|     |                                                                |         |
| Hsa | -----GTTGCTTCAGTGAACATTCAACGCTGTCGGTGAGTTTGGAAATTAATAA-TCAAAA- | [11075] |
| Mmu | -----GTTGCTTCAGTGAACATTCAACGCTGTCGGTGAGTTTGGAAATTAATAA-TAAAAA- | [10906] |
| Mdo | -----GTTGCTTCAGTGAACATTCAACGCTGTCGGTGAGTTTGGAAATTAATAA-TGAAAA- | [10457] |
| Meu | -----GTTGCTTCAGTGAACATTCAACGCTGTCGGTGAGTTTGGAAATTAATAA-TGAAAA- | [8986]  |
| Oan | -----GTTGCTTCAGTGAACATTCAACGCTGTCGGTGAGTTTGGAAATTAATAA-TAGAAA- | [9689]  |
| Aca | TGA--GTTGCTTCAGTGAACATTCAACGCTGTCGGTGAGTTTGGGATTAATAA-TGAAAA-  | [11153] |
| Pbi | TGA--GTTGCTTCAGTGAACATTCAACGCTGTCGGTGAGTTTGGGATTAATAA-TGAAAA-  | [11442] |
| Cpi | TGA--GTTGCTTCAGTGAACATTCAACGCTGTCGGTGAGTTTGGAAATTAATAA-TGAAAA- | [11879] |
| Cmy | TGA--GTTGCTTCAGTGAACATTCAACGCTGTCGGTGAGTTTGGAAATTAATAA-TGAAAA- | [11630] |
| Psi | TGA--GTTGCTTCAGTGAACATTCAACGCTGTCGGTGAGTTTGGAAATTAATAA-TGAAAA- | [10663] |
| Asp | TGA--GTTGCTTCAGTGAACATTCAACGCTGTCGGTGAGTTTGGAAATTAATAA-TGAAAA- | [10069] |
| Ami | -----GTTGCTTCAGTGAACATTCAACGCTGTCGGTGAGTTTGGATTAATAA-TGAAAA-   | [11203] |
| Asi | -----GTTGCTTCAGTGAACATTCAACGCTGTCGGTGAGTTTGGAAATTAATAA-TGAAAA- | [10550] |
| Tgu | -----GTTGCTTCAGTGAACATTCAACGCTGTCGGTGAGTTTGGAAATTAATAA-TGAAAA- | [8735]  |
| Cli | -----GTTGCTTCAGTGAACATTCAACGCTGTCGGTGAGTTTGGAAATTAATAA-TGAAAA- | [11036] |
| Gga | -----GTTGCTTCAGTGAACATTCAACGCTGTCGGTGAGTTTGGAAATTAATAA-TGAAAA- | [9848]  |
| Xtr | -----GCTACTTTAGTGAACATTCAACGCTGTCGGTGAGTTTGGTATCTATAA-GGCAAA-  | [10624] |
| Lch | -----GTTGCTTCAGTGAACATTCAACGCTGTCGGTGAGTTTAGAAA-TACAT-TGAAAA-  | [11578] |
| Dre | -----TTTGCTTCAGTGAACATTCAACGCTGTCGGTGAGTTTGGAGCTAAATG-GAAAAA   | [10621] |
|     |                                                                |         |
| Hsa | -CCATCGACCGTTGATTGTACCCATATGGCTAAC--GGTCACAATCAACATTCAATTGCTGT | [11132] |
| Mmu | -CCATCGACCGTTGATTGTACCCATATAGCTAAC--GGTCACAATCAACATTCAATTGCTGT | [10963] |

Mdo -CCATCGACCGTTGATTGTACCCTACAGCTAAC--GGTCACAATCAACATTCATTGCTGT [10514]  
Meu -CCATCGACCGTTGATTGTACCCTACAGCTAAC--GGTCACAATCAACATTCATTGCTGT [9043]  
Oan -CCATCGACCGTTGATTGTACCCTGCGGC-AAC--GGTCCCAATGAACATTCATTGCTGT [9745]  
Aca -CCATCGACCGTTGATTGTACCCTCCAGCTAAC--GGTCACAATCAACATTCATTGCTGT [11210]  
Pbi -CCATCGACCGTTGATTGTACCCTCCAGCTAAC--GGTCACAATCAACATTCATTGCTGT [11499]  
Cpi -CCATCGACCGTTGATTGTACCCTCCAGCTAAC--GGTCACAATCAACATTCATTGCTGT [11936]  
Cmy -CCATCGACCGTTGATTGTACCCTCCAGCTAAC--GGTCACAATCAACATTCATTGCTGT [11687]  
Psi -CCATCGACCGTTGATTGTACCCTCCAGCTAAC--GGTCACAATCAACATTCATTGCTGT [10720]  
Asp -CCATCGACCGTTGATTGTACCCTCCAGCTAAC--GGTCACAATCAACATTCATTGCTGT [10126]  
Ami -CCATCGACCGTTGATTGTACCCTCCAGCTAAC--GGTCACAATCAACATTCATTGCTGT [11260]  
Asi -CCATCGACCGTTGATTGTACCCTCCAGCTAAC--GGTCACAATCAACATTCATTGCTGT [10607]  
Tgu -CCATCGACCGTTGATTGTACCCTCCAGCTAAC--GGTCACAATGAACATTCATTGCTGT [8792]  
Cli -CCATCGACCGTTGATTGTACCCTCCAGCTAAC--GGTCACAATCAACATTCATTGCTGT [11093]  
Gga -CCATCGACCGTTGATTGTACCCTCCAGCTAAC--GGTCACAATCAACATTCATTGCTGT [9905]  
Xtr -CCATCGATCGTTGACTGTACATTACGGCAATG--GGTCACAATCAACATTCATTGCTGT [10681]  
Lch -CCACTGACCGTTGATTGTACCCTGTAGCTAAC--GGTCACAATCAACATTCATTGCTGT [11635]  
Dre ACCATCGACCGTTGATTGTACCCTGCGGCCGAG--GGTCACAATCAACATTCATTGCTGT [10679]

Hsa CGGTGGGTTGAACGTGTGTGGACAAGCTCACTGAACAATGAATGCAACTGTGGCCCCG--A [11190]  
Mmu CGGTGGGTTGAACGTGTGTAGAAAAGCTCACTGAACAATGAATGCAACTGTGGCCCCG--A [11021]  
Mdo CGGTGGGTTTAACTGTATGGACAAGCTCACTGAACAATGAATGCAACTGTGGCCCCA--A [10572]  
Meu CGGTGGGTTTAACTGTGTGGACAAGCTCACTGAACAATGAATGCAACTGTGGCCCCA--A [9101]  
Oan CGGTGGGTTTAACTCTGAGGACAAGCTCACTGAACAATGAATGGAACGTGGCTC-A--A [9802]  
Aca CGGTGGGTTTAACTATGTGGACAAGCTCACTGAACAATGAATGCAACTGTGGCCCCA--A [11268]  
Pbi CGGTGGGTTTAACTTTGTGGACAAGCTCACTGAACAATGAATGCAACTGTGGCCCCA--A [11557]  
Cpi CGGTGGGTTTAACTATGTGGACAAGCTCACTGAACAATGAATGCAACTGTGGCCCCA--A [11994]  
Cmy CGGTGGGTTTAACTATGTGGACAAGCTCACTGAACAATGAATGCAACTGTGGCCCCA--A [11745]  
Psi CGGTGGGTTTAACTCTGTGGACAAGCTCACTGAACAATGAATGCAACTGTGGCCCCA--A [10778]  
Asp CGGTGGGTTTAACTATGTGGACAAGCTCACTGAACAATGAATGCAACTGTGGCCCCA--A [10184]  
Ami CGGTGGGTTTAACTATGCGGACAAGCTCACTGAACAATGAATGCAACTGTGGCCCCA--A [11318]  
Asi CGGTGGGTTTAACTATGCGGACAAGCTCACTGAACAATGAATGCAACTGTGGCCCCA--A [10665]  
Tgu CGGTGGGTTTAACTATGTGGACAAGCTCACTGAACAATGAATGCAACTGTGGCCCCA--A [8850]  
Cli CGGTGGGTTTAACTATGTGGACAAGCTCACTGAACAATGAATGCAACTGTGGCCCCA--A [11151]  
Gga CGGTGGGTTTAACTATGTGGACAAGCTCACTGAACAATGAATGCAACTGTGGCCCCA--A [9963]  
Xtr CGGTGGGTTGAGTTAAGAACACAAGCTCGCTGAACGATGAATGCAACTGTGTCCCCA--A [10739]  
Lch CGGTGGGTTTAACTATGTGGAAAAGCTCACTGAACAATGAATGCAACTGTGGCCCCG--G [11693]  
Dre CGGTGGGTTGGATTGTAAAAGAAAGCTCACTGAACAATGAATGCAACTGTGTCCCAG--G [10737]

Hsa GGACTCCAAGGAACATTC AACGCTGTCGGTGAGTTT-GGGA---TTTGAAA-----AA [11239]  
Mmu GGACTCCATGGAACATTC AACGCTGTCGGTGAGTTT-GGGA---TTCAAAAAACAAA-AA [11076]  
Mdo TAACTTCAGTGAACATTC AACGCTGTCGGTGAGTTT-TTAGA--TTTAAAAG-----AA [10623]  
Meu TAACTTCAGTGAACATTC AACGCTGTCGGTGAGTTT-GGAGA--TTTAAAAG-----AA [9152]  
Oan GAACCGCAGGGAACATTC AACGCTGTCGGTGAGTTT-GAGA---TAGAGAAG-----AA [9852]  
Aca TAGCTTCAGTGAACATTC AACGCTGTCGGTGAGTTT-GGAA---TCGAGAGC-----AA [11318]  
Pbi TAGCTTCAGCGAACATTC AACGCTGTCGGTGAGTTT-GACA---TGTCAGGAT-----AA [11608]  
Cpi TAGCTTCAGTGAACATTC AACGCTGTCGGTGAGTTT-GAGA---ATTAGAAA-----AA [12044]  
Cmy TAGCTTCAGTGAACATTC AACGCTGTCGGTGAGTTT-GAGA---ATTAGAAA-----AA [11795]  
Psi TAGCTTCAGTGAACATTC AACGCTGTCGGTGAGTTT-GAGA---ATTAGAAAAAAA---AA [10831]  
Asp TAGCTTCAGTGAACATTC AACGCTGTCGGTGAGTTT-GAGA---ATTAGAAAAAAA---AA [10237]  
Ami TAGCTTCAGTGAACATTC AACGCTGTCGGTGAGTTT-GAGC---ATTAGAAAAAAA---AA [11370]  
Asi TAGCTTCAGTGAACATTC AACGCTGTCGGTGAGTTT-GAGC---ATTAGAAAAAAA---AA [10718]  
Tgu TAGCTTCAGTGAACATTC AACGCTGTCGGTGAGTTT-GAGA---ACTAGAAA-----AA [8900]  
Cli TAGCTTCAGTGAACATTC AACGCTGTCGGTGAGTTT-GAGA---ACTACAA-----AA [11200]  
Gga TAGCTTCAGTGAACATTC AACGCTGTCGGTGAGTTT-GAGA---ACTAAGAA-----AA [10013]  
Xtr GGGCTTCAGAGAACATTC AACGCTGTCGGTGAGTTT-GAGAAAGTGTAATAATAT---AA [10795]  
Lch TGGCTTCAGTGAACATTC AACGCTGTCGGTGAGTTT-GAGC---TTTATAAG-----AA [11743]  
Dre TCCCTTG-GTGAACATTC AACGCTGTCGGTGAGTTTGTGCGC---TTCTGTAAC-----AA [10788]

Hsa ACCACTGACCGTTGACTGTACCTTGGGGTCCTT--ATGGCTGCACTCAACATTCATTGCT [11297]  
Mmu ACCACCGACCGTTGACTGTACCTTGGGATTCTT--ATGGCTGCACTCAACATTCATTGCT [11134]  
Mdo ACCATCGACCGTTGACTGTGCCTTGAGGTTTAT--ATGTCTGCAATCAACATTCATTGCT [10681]  
Meu ACCATCGACCGTTGACTGTACCTTGGAGGTTTAT--ATGTCTGCAATAAACATTCATTGCT [9210]  
Oan ACCATCGACCGTTGACTGTACCTTGGAGGTTTAT--ATGGCTGCAATCAACATTCATTGCT [9910]  
Aca ACCATCGACCGTTGACTGTACCTTGGAGGTTTAT--ACGGCTGCAATCAACATTCATTGCT [11376]  
Pbi ACCATCGACCGTTGACTGTACCTTGGAGGTTTAT--ATGGCTGCACTCAACATTCATTGCT [11666]  
Cpi ACCATCGACCGTTGACTGTACCTTGGAGGTTATAT--ATGGCTGCAATCAACATTCATTGCT [12102]  
Cmy ACCATCGACCGTTGACTGTACCTTGGAGGTTTAT--ATGGCTGCAATCAACATTCATTGCT [11853]  
Psi ACCATCGACCGTTGATTGTACCTTGGAGGTTTAT--ATGGCTGCAATCAACATTCATTGCT [10889]  
Asp ACCATCGACCGTTGATTGTACCTTGGAGGTTTAT--ATGGCTGCAATCAACATTCATTGCT [10295]  
Ami ACCATCGACCGTTGACTGTACCTTGGAGGTTTAT--ATGGCTGCAATCAACATTCATTGCT [11428]  
Asi ACCATCGACCGTTGACTGTACCTTGGAGGTTTAT--ATGGCTGCAATCAACATTCATTGCT [10776]  
Tgu ACCATCGACCGTTGACTGTACCTTGGAGGTTTAT--ATGGCTGCAATCAACATTCATTGCT [8958]  
Cli ACCATCGACCGTTGACTGTACCTTGGAGGTTTAT--ATGGCTGCAATCAACATTCATTGCT [11258]  
Gga ACCATCGACCGTTGACTGTACCTTGGAGGTTTAT--ATGGCTGCAATCAACATTCATTGCT [10071]  
Xtr ACCATCGGCCGTTGACTGTACCCTGAGGCTTTT--ATGGCTGCAATAAACATTCATTGCT [10853]  
Lch ACCATCGACCGTTGACTGTACCTTGGAGGTTCTAT--ATGGCTGCAATCAACATTCATTGCT [11801]  
Dre ACCATCGACCGTTGACTGTACCCTGAGGGTGGC--ATGACTGCAATAAACATTCATTGCT [10846]

Hsa GTCGGTGGGTTTGGAGTCTGAATCAACTCACTGATCAATGAATGCAAACCTGCGGACCA--A [11355]  
Mmu GTCGGTGGGTTTGAATGTCAACCAACTCACTGATCAATGAATGCAAACCTGCGGGCCA--A [11192]  
Mdo GTCGGTGGGTTTTTGGATTCAATCAACTCACTGATCAATGAATGCAAACCTGCGGATCA--A [10739]  
Meu GTCGGTGGGTTTTTATCTCAATCAACTCACTGATCAATGAATGCAAACCTGCGGATCA--A [9268]  
Oan GTCGGTGGGTTTTTGTCTGAATCAACTCACTGATCAATGAATGCAAACCTGCGGACCA--A [9968]  
Aca GTCGGTGGGTTTTAGGTTTCTGAGTCTCTGACCAATGAATGCAAACCTGCGGACCA--A [11434]  
Pbi GTCGGTGGGTTTTCGGGTTTCTGAGTCTCTGAGCCCTCTGGCCAATGAATGCAAACCTGCGGATCA--A [11724]  
Cpi GTCGGTGGGTTTTAGTTTGTATCAACTCACTGATCAATGAATGCAAACCTGCGGACCA--A [12160]  
Cmy GTCGGTGGGTTTTAGTTTGTATCAACTCACTGATCAATGAATGCAAACCTGCGGACCA--A [11911]  
Psi GTCGGTGGGTTTTAGTTTGTATCAACTCACTGATCAATGAATGCAAACCTGCGGACCA--A [10947]  
Asp GTCGGTGGGTTTTAGTTTGTATCAACTCACTGATCAATGAATGCAAACCTGCGGACCA--A [10353]  
Ami GTCGGTGGGTTTTAGTTTGTACCAACTCACTGATCAATGAATGCAAACCTGCGGACCA--A [11486]  
Asi GTCGGTGGGTTTTAGTTTGTACCAACTCACTGATCAATGAATGCAAACCTGCGGACCA--A [10834]  
Tgu GTCGGTGGGTTTTCTATTTCTATCAACTCACTGACCAATGAATGCAAACCTGCGGACCA--- [9015]  
Cli GTCGGTGGGTTTTCTTTTTCTGTCAACTCACTGATCAATGAATGCAAACCTGCGGACCA--- [11315]  
Gga GTCGGTGGGTTTTCTATTGCTATCAACTCACTGATCAATGAATGCAAACCTGCGGACCA--- [10128]  
Xtr GTCGGTGGGTTGTAGTTTGTAGAAAAGCTCATTGATCAATGAATGCAAACCTGCGGACCA--- [10910]  
Lch GTCGGTGGG-TTTACTTTAGATCAACTCACTGATCAATGAATGCAAACCTGCGGACCA--A [11858]  
Dre GTCGGTGGGTTTTCTAATAGACACAACCTCACTGATCAATGAATGCAAACCTGCGGTGCA--C [10904]

Hsa GGGTTTGGGGGAACATTC AAC-CTGTTCGGTGAGTTTGGGCAGCTCA-GGCAAACCATCGA [11413]  
Mmu GGGTTTGGGGGAACATTC AAC-CTGTTCGGTGAGTTTGGGCAGCTCA-GACCAAACCATCGA [11250]  
Mdo AGGTTTGGGGGAACATTC AACCGCTGTTCGGTGAGTTTGGGCAGCTGAAGGCAAACCATCGA [10799]  
Meu AGGTTTGGGGGAACATTC AACCGCTGTTCGGTGAGTTTGGGCAGCTGAAGGCAAACCATCGA [9328]  
Oan AGGTTTGGGGGAACATTC AACCGCTGTTCGGTGAGTTTGGGCAGTGAAGGTTAAACCACCGA [10028]  
Aca AGGTTTGGGGGAACATTC AACCGCTGTTCGGTGAGTTTGTCAATGAA-GTCAAACCATCGA [11493]  
Pbi AGTTTCTCAGGGGAACATTC AACCGCTGTTCGGTGAGTTTGTCAATGAA-GTCAAACCATCGA [11783]  
Cpi AGGTTTTCAGTGAACATTC AACCGCTGTTCGGTGAGTTTCTCAATAAG-GTTAAACCATCGA [12219]  
Cmy AGGTTTTCAGTGAACATTC AACCGCTGTTCGGTGAGTTTCTTAGTAAG-GCTAAACCATCGA [11970]  
Psi AGGTTTTCAGTGAACATTC AACCGCTGTTCGGTGAGTTTCTCAGTAAG-GTTAAACCATCGA [11006]  
Asp AGGTTTTCAGTGAACATTC AACCGCTGTTCGGTGAGTTTCTCAGTAAG-GTTAAACCATCGA [10412]  
Ami AGGTTTTCAGCGAACATTC AACCGCTGTTCGGTGAGTTTGGCAGTCAG-GTTAAACCATCGA [11545]  
Asi AGGTTTTCAGCGAACATTC AACCGCTGTTCGGTGAGTTTGGCAGTCAG-GTTAAACCATCGA [10893]  
Tgu ----- [9015]  
Cli ----- [11315]  
Gga ----- [10128]

Xtr ----- [10910]  
Lch AGGTTTCAGTGAACATTCAGCGCTGTCGGTGAGTTTGGGCAGTAAG-ATTAAACCATCGA [11917]  
Dre GAGTCTCAGAGAACATTC AACCGCTGTCGGTGAGTTT--GCAAGTGA-GAAAAACCATCGA [10961]

Hsa CCGTTGAGTGGACCCGAGGCCTGG--GAGGTCACAATCAACATTCATTGTTGTCGGTGG [11471]  
Mmu CCGTTGAGTGGACCCGAGGCCTGG--AAGGTCACAATTAACATTCATTGTTGTCGGTGG [11308]  
Mdo CCGTTGAGTGGACCCGAGGCCTTA--AAGGTCACAATCAACATTCATTGCTGTCGGTGG [10857]  
Meu CCGTTGAGTGGACCCGCAACCTTA--AAGGTCACAATCAACATTCATTGCTGTCGGTGG [9386]  
Oan CCGTTGAGTGTACCCCTCAGCCTAG--AAAGTCACAATCAACATTCATTACTGTCGGTGG [10086]  
Aca CTGTTGAGTGTACCCGCGCCTTTT--AAAGTCACAATCAACATTCATT-CTGTCGGTGG [11550]  
Pbi CTGTTGAGTGTACCCGCGCCTTTT--AAAGTCACAATCAACATTCATT-CTGTCGGTGG [11840]  
Cpi CCGTTGAGTGTACCCGCGGCCGGA--AAAGTCACAATCAACATTCATTGCTGTCGGTGG [12277]  
Cmy CCGTTGAGTGTACCCGCGCCTGA--AAAGTCACAATCAACATTCATTGCTGTCGGTGG [12028]  
Psi CCGTTGAGTGTGCCCTGCGGCCTGA--AAAGTCACAATCAACATTCATTGCTGTCGGTGG [11064]  
Asp CCGTTGAGTGTGCCCTGCGGCCCGA--AAAGTCACAATCAACATTCATTGCTGTCGGTGG [10470]  
Ami CCGTTGAGTGTACCCGCAACCTTG--AAAGTCACAATCAACATTCATTGCTGTCGGTGG [11603]  
Asi CCGTTGAGTGTACCCGCAACCTTG--AAAGTCACAATCAACATTCATTGCTGTCGGTGG [10951]  
Tgu ----- [9015]  
Cli ----- [11315]  
Gga ----- [10128]  
Xtr ----- [10910]  
Lch CCGCTGACTGTACCCGCAACTGCA--AAAGTCACAATTAACATTCATTGCTGTCGGTGG [11975]  
Dre GTGTTGAGTGTACCCGCTCTCGA--AAGGTCATAATCAACATTCATTGCTGTCGGTGG [11019]

Hsa GTTGTGAGGACTGAGGCCAGACCCACCGGGGGATGAATGTCACTGT-GGCTGGG--CCAG [11528]  
Mmu GTTGTGAGGAG-GCAGCCAGACCCACCGGGGGATGAATGTCACTGT-GGCTGGG--CAGA [11364]  
Mdo GTTGTGAGATCTGAGGAAAAACTCACCGATGGATGAATGTCACTGT-GGCTGGG--CCAG [10914]  
Meu GTTGTGAGATGTGAGGCAAAACTCACCGATGGATGAATGTCACTGT-GGCTGGG--CCAG [9443]  
Oan GTTGTGATAAATGA-AAAAAACTCACCGCCAGATGAATGCCACTGT-GGCTAGG--CCCA [10142]  
Aca GTTGTGATGCTGGAGGAGAACCTCACTGATCAGTGAATGCAACTGT-GGCTGGA--CCGC [11607]  
Pbi GTTGTATGCTGGAGGAGAAGCTCACTGATCAGTGAATGCAACTGT-GGCTGGA--TTCC [11897]  
Cpi GTTGTGTTGTTGAAGGAAAAACTCACTGATCAATGAATGCAACTGT-GATTGGA--CCAT [12334]  
Cmy GTTGTGTTGTTGAAGGAAAAACTCACTGATCAATGAATGCAACTGT-GATTGGA--CCAT [12085]  
Psi GTTGTGTTATTGAAGGAAAAACTCACTGATCAATGAATGCAACTGT-GATTGGA--CCAT [11121]  
Asp GTTGTGTTGTTGAAGGAAAAACTCACTGATCAATGAATGCAACTGT-GATTGGA--CCAT [10527]  
Ami GTTGTGATGCTGAAGGAAAAACTCACGGATCAATGAATGCAACTGT-GATTGGA--CCAT [11660]  
Asi GTTGTGATGCTGAAGGAAAAACTCACGGATCAATGAATGCAACTGT-GATTGGA--CCAT [11008]  
Tgu -----CCGC [9019]  
Cli -----CCAT [11319]  
Gga -----CCGC [10132]  
Xtr -----CCAG [10914]  
Lch GTTGTGATGTTTAAAAAGAAACTCACTGCACAATGAATGCCACTGT-GGCTGTC--TCGT [12032]  
Dre GTTTAGTCTTGTA-----CAGCTCTCTGAACAATGAATGTAAGTGT-GGCCAG--TCGA [11072]

Hsa TCACGTCCCCTTATCACTTTTCCAGCCCAGCTTTGTGACTGTA-AGTGTGGACGGAGAA [11587]  
Mmu TCCCCTTTTCTTATCACTTTTCCAGCC-AGCTTTGTGACTCTA-AGTGTGGACGGAGAA [11422]  
Mdo TCACATCCCCTTATCACTTTTCCAGCCCAGCTTTCTAATGCTA-ATTGTTGGACGGAGAA [10973]  
Meu TCACGTCCCCTTATCACTTTT-CCAGCCCAGCTTTCTAATTCTA-ATTGTTGGACGGAGAA [9501]  
Oan TCACGTCTCTTTATCACTTTTCCAGCCCAGCTTTCTGGTTCTA-GCCGTTGGACGGAGAA [10201]  
Aca TCACGTCCCCTTATCACTTTTCCAGCC-AGCTTTCTTGTCTATA-ACCGTTGGACGGAGAA [11665]  
Pbi CCACGTCTCCTTATCACTCTTCCAGCC-AGCTTTCTTCTTGTGCA-AGTGTGGACGGAGAA [11955]  
Cpi TCTCGTGTCTTATCACTTTTCCAGCCCAGCTTTTTTCATTGTA-ACTGTTGGACGGAGAA [12393]  
Cmy TCTCATGTCTTATCACTTTTCCAGCCCAGCTTTTTTCATTGTA-TCTGTTGGACGGAGAA [12144]  
Psi TCTCGTCTCCTTATCACTTTTCCAGCCCAGCTGTCTCACTGCA-GGTGTTGGACGGAGAA [11180]  
Asp TCTCGTCTCCTTATCACTTTTCCAGCCCAGCTGTCTCACTGCA-GGTGTTGGACGGAGAA [10586]  
Ami TCCCATCTCCTTATCACTTTTCCAGCCCAGCTTTCTCATGCTC-ACTGTTGGACGGAGAA [11719]  
Asi TCCCATCTCCTTATCACTTTTCCAGCCCAGCTTTCTCATGCTC-ACTGTTGGACGGAGAA [11067]

Tgu TCTCGTGCCCTTATCACTTTTCCAGCCCAGCTTCTGCACTCTG-ACTGTTGGACGGAGAA [9078]  
Cli TCTCATCTCCTTATCACTTTTCCAGCCCAGCTTCTTCACTGTA-ACTGTTGGACGGAGAA [11378]  
Gga TCTCACCCCTTATCACTTTTCCAGCCCAGCTTCTTCGCTCTG-ACTGTTGGACGGAGAA [10191]  
Xtr TATCACTTTCCTTATCACTTTTCCAGCCCAGCTTTTCATGACAA-ACTGTTGGACGGAGAA [10973]  
Lch TCACATGTCCTTATCATTTTTTCCAGCCCAGCTTTCAAATGATC-TTTGTGGACGGAGAA [12091]  
Dre ACACGTCTCCTTATCACTTTTCCAGCCCAGCTATCCATTTAGTATTCGTTGGACGGAGAA [11132]

Hsa CTGATAAGGGTAGGTGATTG--TGTGAGACCTCGGGCTACAACACAGGACCCGGGCGCTG [11645]  
Mmu CTGATAAGGGTAGGTGACTG--TGCGGGTCTCAGGCTACAACACAGGACCCGGGCGCTG [11480]  
Mdo CTGATAAGGGTAGGTGATTG--TGTGAGACCTCTGGCTACAACACAGGACACGGGAGCTT [11031]  
Meu CTGATAAGGGTAGGTGACTG--TGTGAGACCTCTGGCTACAACACAGGACATGGGAGCTT [9559]  
Oan TTGATAAGGGTACGGGGTCG--TGTGAGACCTCCGGCTACAACAGAGGACACAGGAGCTT [10259]  
Aca CTGATAAGGGTTTTGTGGGTG--TGTGAGACCTTTGGCTACAACACAGAACATGGGCGCTT [11723]  
Pbi CTGATAAGGGTATGTGGGTG----- [11975]  
Cpi CTGATAAGGGTATGTGACTG--TGTGAGACCTCGGGCTACAACACAGGACATGGGAGCTT [12451]  
Cmy CTGATAAGGGTATGTGACTG--TGTGAGACCTCGGGCTACAACACAGGACATGGGAGCTT [12202]  
Psi CTGATAAGGGAACGGGACTG--TGTGAGACCTCGGGCTACAACACAGGACATGGGAGCTT [11238]  
Asp CTGATAAGGGAATGGGACTG--TGTGAGACCTCGGGCTACAACACAGGACATGGGAGCTT [10644]  
Ami CTGATAAGGGTATGTGACTG--TGTGAGACCTCCGGCTACAACACAGGACATGGGAGCTT [11777]  
Asi CTGATAAGGGTATGTGACTG--TGTGAGACCTCCGGCTACAACACAGGACATGGGAGCTT [11125]  
Tgu CTGATAAGGGTGC CGAGTG--TGTGAGACCTCCGGCTACAACACAGGACATGGGAGCTT [9136]  
Cli CTGATAAGGGTATGCGAGTG--TGTGAGACCTCCGGCTACAACACAGGACATGGGAGCTT [11436]  
Gga CTGATAAGGGTGTGCGGGTG--TGTGAGACCTCCGGCTACAACACAGGACATGGGAGCTT [10249]  
Xtr CTGATAAGGCTGTGTGACTG--TGGTATACCTTTGGTTACAACACAGGACATGGGAGCTT [11031]  
Lch TTGATAAGGGTGTGAGATTG--TGCGATGCCTCGGGCTGCAACACAGGACATGGGAGCTT [12149]  
Dre CTGATAAGGGCATGTGCCCG--GGCTGGGCCAGGGGCTGCAACACAGGACATGGGAGCTG [11190]

Hsa ----CTCTGACCCCTCGTGTCTTGTGTTGCAGCCGAGGGGACGCAGG--GCAGGCCTCTG [11699]  
Mmu ----CTCTGACCCCTCGTGTCTTGTGTTGCAGCCGAGGGGACGCAGG--GCAGGCCTCTG [11534]  
Mdo ----TTCTGAACCCTCGTGTCTTGTGTTGCAGCCAGAGGGGACACATC--GCAGGCCTCTG [11085]  
Meu ----TTCTGAACCCTCGTGTCTTGTGTTGCAGCCAGAGGGGACACATC--GCAGGCCTCTG [9613]  
Oan ----TTCAGAACCCTCGTGTCTTGTGTTGCAGCCAGAGGAGCACATC--GCAGGCCTCTG [10313]  
Aca ----TCTTGGACCCTCGTGTCTTGTGTTGCAGCCAGAGGGGACACATC--GCAGGGCTCTG [11777]  
Pbi -----GTGAGACTCTG [11986]  
Cpi ----TTCTGAACCCTCGTGTCTTGTGTTGCAGCCAGAGGGGACACATC--GCAGGGCTCTG [12505]  
Cmy ----TTCTGAACCCTCGTGTCTTGTGTTGCAGCCAGAGGGGACACATC--GCAGGGCTCTG [12256]  
Psi ----TTCTGAACCCTCGTGTCTTGTGTTGCAGCCAGAGGGGACACATC--GCAGGGCTCTG [11292]  
Asp ----TTCTGAACCCTCGTGTCTTGTGTTGCAGCCAGAGGGGACACATC--GCAGGGCTCTG [10698]  
Ami ----TTCTGAACCCTCGTGTCTTGTGTTGCAGCCAGAGGGGACACATC--GCAGGACTCTG [11831]  
Asi ----TTCTGAACCCTCGTGTCTTGTGTTGCAGCCAGAGGGGACACATC--GCAGGACTCTG [11179]  
Tgu ----TTCTGAACCCTCGTGTCTTGTGTTGCAGCCAGAGGGGACACATC--GCAAGACTCTG [9190]  
Cli ----TTCTGAACCCTCGTGTCTTGTGTTGCAGCCAGAGGGGACACATC--GCAGGACTCTG [11490]  
Gga ----TTCTGAACCCTCGTGTCTTGTGTTGCAGCCAGAGGGGACACATC--GCAGGACTCTG [10303]  
Xtr A---CTTGAACCCTCGTGTCTTGTGTTGCAGCCAGTGGTGGCCAAA----- [11075]  
Lch ----ATTGTAACCCTCGTGTCTTGTGTTGCAGCCAGTGGGGTTGCAT--GCAGGACTCTG [12203]  
Dre TCTCTCACTCCCGCTCGTGTCTTGTGTTGCAGCCAGTGGAAACGGCTA--GCAGGCCTCTG [11248]

Hsa TGTGATATGTTTGATATATTAGGTTGTTATTTAATCCAACCTATATATCAAACATATTCCCT [11759]  
Mmu TGTGATATGTTTGATATATTAGGTTGTTATTTAATCCAACCTATATATCAAGCATATTCCCT [11594]  
Mdo TGTGATATGTTTGATATATTAGGTTGTTATTTAATCCAACCTATATATCAAACATATTCCCT [11145]  
Meu TGTGATATGTTTGATATATTAGGTTGTTATTTAATCCAACCTATATATCAAACATATTCCCT [9673]  
Oan TGTGATATGTTTGATATATTAGGTTGTTATTTAATCCAACCTATATATCAAACATATTCCCT [10373]  
Aca TGTGATATGTTTGATATATTAGGTTGTAATTTGAGCCCAACTATATATCAAACAT--TCCT [11835]  
Pbi TGTGATATGTTTGATATATTAGGTTGTAATTTGAGCCCAACTATATATCAAACAT--TCCT [12044]  
Cpi TGTGATATGTTTGATATATTAGGTTGTTATTTAATCCAACCTATATATCAAACATATTCCCT [12565]  
Cmy TGTGATATGTTTGATATATTAGGTTGTTATTTAATCCAACCTATATATCAAACATATTCCCT [12316]  
Psi TGTGATATGTTTGATATATTAGGTTGTTATTTAATCCAACCTATATATCAAACATATTCCCT [11352]

Asp TGTGATATGTTTGGATATATTAGGTTGTTATTTAATCCAACATATATCAAACATATTCCCT [10758]  
Ami TGTGATATGTTTGGATATATTAGGTTGTTATTTAATCCAACATATATCAAACATATTCCCT [11891]  
Asi TGTGATATGTTTGGATATATTAGGTTGTTATTTAATCCAACATATATCAAACATATTCCCT [11239]  
Tgu TGTGATATGTTTGGATATATTAGGTTGTTATTTAATCCAACATATATCAAACATATTCCCT [9250]  
Cli TGTGATATGTTTGGATATATTAGGTTGTTATTTAATCCAACATATATCAAACATATTCCCT [11550]  
Gga TGTGATATGTTTGGATATATTAGGTTGTTATTTAATCCAACATATATCAAACATATTCCCT [10363]  
Xtr ----- [11075]  
Lch TGTGATATGTTTGGATATATTAGGTTGTTATTTAATCCAACATATATCAAACATATTCCCT [12263]  
Dre TTTGATATGTTTGGATATATTAGGTTGTTATTTCTGTCCAACATATATCAAACATATTCCCT [11308]

Hsa ACAGTGTCTTGCC--GCCTGCTTCTGTGTGATATGTTTGGATATTGGGTTGTTTAAATTAGG [11817]  
Mmu ACAGTGTCTTGCC--GCCTGCTTCTGTGTGATATGTTTGGATATTGGGTTGTTTAAATTATG [11652]  
Mdo ACAGTGTCTTGCC--CCCTACTTCTGTGTGATATGTTTGGATATTGGGTTGTTTGGATTGGG [11203]  
Meu ACAGTGTCTTGCC-----ATGTTTGGATATTAGGTTGTTTGGATTGAG [9714]  
Oan ACAGTGTCTTGCC-----CTCTGTGTGATATGTTTGGATATTAGGTTGTTTACGCTAGA [10425]  
Aca ACAGGGCCCCGCT--CCCTGCTTCTG--CTGATATGTTTGGATATTAGGTTGTTTCTACTGGG [11892]  
Pbi ACGGTGTCTCGCT--CCCAGCCTCTGTCTGATATGTTTGGATATTAAAGTTGTTTCTCCTGGG [12102]  
Cpi ATAGTGTCTTGCC--CCCTGCCGCTGGCTGATATGTTTGGATATTAGGTTGTTTATTGGA [12623]  
Cmy ATAGTGTCTTGCC--CCCTGCCGCTGGCTGATATGTTTGGATATTAGGTTGTTTATTGGA [12374]  
Psi ATAGTGTCTTGCC----- [11365]  
Asp ATAGTGTCTTGCC----- [10771]  
Ami ACAGTGTCTTGCC--ACCTGCCTCTGTCTGATATGTTTGGATATTAGGTTGTTTATTGGA [11949]  
Asi ACAGTGTCTTGCC--ACCTGCCTCTGTCTGATATGTTTGGATATTAGGTTGTTTATTGGA [11297]  
Tgu ACAGTGTCTTGCC--CCCTGTCTCTGTCTGATATGTTTGGATATTAGGTTGTTTATTGGA [9308]  
Cli ACAGTGTCTTGCC--CCCTGTCTCTGTCTGATATGTTTGGATATTAGGTTGTTTATTGGA [11608]  
Gga ACAGTGTCTTGCC--CCCTGCCTCTGTCTGATATGTTTGGATATTAGGTTGTTTGGATTGGA [10421]  
Xtr -----CCGTGGTTCTGTCTGATATGTTTGGATATTAGGTTGTTTACTAA- [11119]  
Lch ACAGTGTCTTGCC--GTTTGGTTCTGTGTGATATGTTTGGATATTAGGTTGTTTATTAA- [12320]  
Dre ACAGTGTCTTGCT--GTTACAGACTATGTGATATGTTTGGATATTCCGGTTGCTTTCTTTAT [11366]

Hsa AA-CC---AACTAAATGTCAAACATATTCTTACAGCAGCAGGT--TGGACAGCGGGCAAC [11871]  
Mmu AA-CC---AACTGAATGTCAAGCATACTCTCACAGCAGTAAGG--TGGACAGCGGGCAAC [11706]  
Mdo AA-TC---AACTAAATGTCAAACATATTCTTACAGCGGTGGG--TTGACAGCGGGCAAC [11257]  
Meu AA-TC---AACTAAATGTCAAACATATTCTTACAGCGGTGGG--TTGACAGCGGGCAAC [9768]  
Oan CC-TC---ACCTGAATATCAGACATATTCTTACAGCGGCTGGG--TTGACAGCAGGCAAC [10479]  
Aca AAACC---AACTAAATATCAAACATATTCTTACAGCGCCAGGG--TTGATAGTGGGCAAC [11947]  
Pbi AAACC---AACTAAATATCAGACATATTCCGACAGCGACTGGG--ATAAGAATGGGCAAC [12158]  
Cpi AAACC---AACTAAATATCAAACATATTCTTCCGGCGCCAGGG--ACGACAGCGGGCAAC [12678]  
Cmy AAACC---AACTAAATATCAAACATATTCTTCCCGCGCCAGGG--GTGACAGCAGGCAAC [12429]  
Psi ----- [11365]  
Asp ----- [10771]  
Ami AAGCC---AACTAAATATCAAACATATTCTTACAGCGCCAGGG--GCGACAGCGGGCAAC [12004]  
Asi AAGCC---AACTAAATATCAAACATATTCTTACAGCGCCAGGG--GCGACAGCGGGCAAC [11352]  
Tgu AAACC---AACTAAATATCAAACATATTCTTACAGCGCCAGGG----- [9348]  
Cli AAACC---AACTAAATATCAAACATATTCTTACAGCGCCAGGG--GCCACCGCGGGCAAC [11663]  
Gga AA-CC---AACTAAATATCAAACATATTCTTACAGCGCCAGGG----- [10460]  
Xtr AA-CTC---GACTAAATATCATAACATATTGCTACAGCGCCCTGG--GGTAGCTCTGACAAC [11174]  
Lch AAACC---AACTAAATATCAGACATATTCTTACAGCGCCAGAT----- [12360]  
Dre ATCATGTCAACTAAATATCAGACATATTCTTATAGACTGTGAC----- [11409]

Hsa GGAATCCCAAAGCAGCTGTTGTCTCCAGAGCATTTCCAGCTGCGCTTGGATTTTCGTCCCC [11931]  
Mmu GGAATCCCAAAGCAGCTGTTGTCTCCAGAGCATTTCCAGCTGCACTTGGATTTTCGTCCCC [11766]  
Mdo GGAATCCCAAAGCAGCTGTTGTCTCCAGAGCATTTCCAGCTGCAATTGGATTTTCGTCCCC [11317]  
Meu GGAATCCCAAAGCAGCTGTTGTCTCCAGAGCATTTCCAGCTGCGATTGGATTTTCGTCCCC [9828]  
Oan GGAATCCCAAAGCAGCTGTTGTCTCCAGAGCATTTCCAGCTGCACTTGGATTTTCGTCCCC [10539]  
Aca GGAATCCCAAAGCAGCTGTTTCTCTTAAAGTTCCAGCTGCACTTGGATTTTCGTCCCC [12007]  
Pbi GGAATCCCAAAGCAGCTGTTTCTCTGAGTCTTCCAGCTGCACTTGGATTTCCGTCCCC [12218]

|     |                                                                 |         |
|-----|-----------------------------------------------------------------|---------|
| Cpi | GGAATCCCAAAAGCAGCTGTCTTCCCTCTGAGCATTCAGCTGCGGTTGGATTTTCGTTACC   | [12738] |
| Cmy | GGAATCCCAAAAGCAGCTGTCTTCCCTCTGAGCATCCCAGCTGCGGTTGGATTTTCGTTACC  | [12489] |
| Psi | -----                                                           | [11365] |
| Asp | -----                                                           | [10771] |
| Ami | GGAATCCCAAAAGCAGCTGTCTTCCGCTCGGCACCTCAGCTGCGCTTGGATTTTCGTTCCC   | [12064] |
| Asi | GGAATCCCAAAAGCAGCTGTCTTCCGCTCGGCACCTCAGCTGCGCTTGGATTTTCGTTCCC   | [11412] |
| Tgu | -----                                                           | [9348]  |
| Cli | GGAATCCCAAAAGCAGCTGTCCCCGCTG----TGCCCAGCTGCCCTGGGGTTTCGTTACC    | [11719] |
| Gga | -----                                                           | [10460] |
| Xtr | GGAATCCCAAAAGCAGCTGTTGTGAAAA----TGTTTCAGCTGCAGTTGGGACCCGTTTCAC  | [11230] |
| Lch | -----                                                           | [12360] |
| Dre | -----                                                           | [11409] |
|     |                                                                 |         |
| Hsa | TGCTCTCCTGCC--GTGCACAGGG-CTCTGACCT-ATGAATTGACAGCCAGTGCTCTCGT    | [11987] |
| Mmu | TGCTCTCCTGCC--GTGCACAGGG-CTCTGACCT-ATGAATTGACAGCCAGTACTCTTTT    | [11822] |
| Mdo | TGCTCTCCTGCC-----                                               | [11329] |
| Meu | TGCTCTCCTGCC--GTGCGCAGGGGCTCTGACCTTATGAATTGACAGCCAGTACTCATTC    | [9886]  |
| Oan | TGCTATCCTGCA--GCGCACAGGG-CTCTGACCT-ATGAATTGACAGCCAGTTCTCTC-T    | [10594] |
| Aca | TGCTTTCCCTACC-----                                              | [12019] |
| Pbi | TGCTCTTTTGCT-----                                               | [12230] |
| Cpi | TGCTCTCCTGCC--GTGCACAGGA-CTATGACCT-ATGAATTGACAGCCAGTCCTTCTGC    | [12794] |
| Cmy | TGCTCTCCTGCC--GTGCACAGGC-CTATGACCT-ATGAATTGACAGCCAGTCCTGCTGC    | [12545] |
| Psi | -----GTGCACAGGA-CTATGACCT-ATGAATTGACAGCCAGTCCTGCCAT             | [11409] |
| Asp | -----GTGCACAGGA-CTATGACCT-ATGAATTGACAGCCAGTCCTGCCAT             | [10815] |
| Ami | TGCTCTCCC GCC--GTGCATGGGG-CTATGACCT-ATGGATTGACAGCCAGTATCGGAGC   | [12120] |
| Asi | TGCTCTCCC GCC--GTGCATGGGG-CTATGACCT-ATGGATTGACAGCCAGTATCCGAGC   | [11468] |
| Tgu | -----                                                           | [9348]  |
| Cli | CGCGCTCCC GCC-----                                              | [11731] |
| Gga | -----                                                           | [10460] |
| Xtr | GGATCTATTGCC--GTGTACGGGC-CTATGACCT-ATGAATTGACAGCCAGTGGATGTGA    | [11286] |
| Lch | -----CTGGACAGGC-CTATGACCT-ATGTATTGACAGTCAGTTGGCCATC             | [12404] |
| Dre | -----GGACACAGGG-TGATGACCT-ATGAATTGACAGCCAGTGTTTGCAG             | [11453] |
|     |                                                                 |         |
| Hsa | CTCCCCTCTGGCTGCCAATTCCATAGGTCACAGGTATGTTTCGCC--GTATACAGGAAAAAT  | [12045] |
| Mmu | CTCTCCTCTGGCTGCCAATTCCATAGGTCACAGGTATGTTTCACC--GTGTACAGGAGAAT   | [11880] |
| Mdo | -----GTGTGTAGGAAAAAT                                            | [11343] |
| Meu | TCCCTTTCTGGCTGCCAATTCCATAGGTCACAGGTATGTTTCGCC-----              | [9930]  |
| Oan | GACCCCTCTGGCTGCCAATTCCATAGGTCACAGGTATGTTTCGCC--GTGTACAGGAAAAAT  | [10652] |
| Aca | -----AGGCTTAGGGTAAT                                             | [12033] |
| Pbi | -----AGGTCCAGGGTAAT                                             | [12244] |
| Cpi | CGCGCC-CTGGCTGTCAGTTCTGTAGGGCACAGGTATGTTTCACC--GTGTACAGGAAAAAT  | [12851] |
| Cmy | ---GCC-CTGGCTGTCAGTTCTGTAGGGCACAGGTATGTTTCACC--GTGTACAGGAAAAAT  | [12599] |
| Psi | ---GCC-TTGGCTGTCAGTTCTGTAGGGCACAGGTATGTTTCACC--GTATATAGGAAAAAT  | [11463] |
| Asp | ---GCC-TTGGCTGTCAGTTCTGTAGGGCACAGGTATGTTTCACC--GTGTATAGGAAAAAT  | [10869] |
| Ami | CTCGCC-CTGGCTGTCAGTTCTGTATAGGGCATAGGACTGGGCGCA--TTGTGCAGGAAAAAT | [12177] |
| Asi | TTCGCC-CTGGCTGTCAGTTCTGTATAGGGCATAGGACTGGGCGCA--TTGTGCAGGAAAAAT | [11525] |
| Tgu | -----GTGTCCAGGAAAAAT                                            | [9362]  |
| Cli | -----GTGTCCAGGAAAAAT                                            | [11745] |
| Gga | -----GTGTCCAGGAAAAAT                                            | [10474] |
| Xtr | AGT----CTGCCTGTCAATTCTGTAGGCCACAGGTTTCGTTCCACC--GTAACCAGGAGGAT  | [11340] |
| Lch | TAGAAT-CTGGCTGTCAATTCTGTAGGTCACAGGTATGTTAGCC--GCTAACAGGACAAT    | [12461] |
| Dre | TCCAG--CTGCCTGTCAGTTCTGTAGGGCACTGCCCTGTTTATC-----               | [11495] |
|     |                                                                 |         |
| Hsa | GACCTATGAATTGACAGACAATATAGCT---GAGTTTGTCTGTCATTTCTTTAGGCCAAT    | [12102] |
| Mmu | GACCTATGATTTGACAGACCGTGCAGCT---GTGTATGTCTGTCATTTCTGTAGGCCAAT    | [11936] |
| Mdo | GACCTATGAATTGACAGACATATATTTA--AAGTTTGTCTGTCATTTCTGTAGGCCAAT     | [11401] |
| Meu | -----                                                           | [9930]  |

Oan GACCTATGAATTGACAGACAGTATATTTA----GATTGTCTGTCATTTCTGTAGGCCAAA [10708]  
Aca GACCTATGATTTGACAGACTGTGCTTTCT--ATGTCTGCCTGTCATTTCTGTAGGCCAAT [12091]  
Pbi GACCTATGATTTGACAGACTGTGCTATGT--AAGTCTGCCTGTCATTTCTGTAGGCCAAT [12302]  
Cpi GACCTATGAATTGACAGACTGTGTCTTTCT--AAATTTGTCTGTCACCTTCTGTAGGCCAAT [12909]  
Cmy GACCTATGAATTGACAGACTGTGTCTTTCT--AAATTTGTCTGTCACCTTCTGTAGGCCAAT [12657]  
Psi GACCTATGAATTGATAGACTGTGACTTTT--AAATTTGTCTGTCAGTTCTGTAGGCCAAT [11521]  
Asp GACCTATGAATTGATAGACTGTGACTTTT--AAATTTGTCTGTCAGTTCTGTAGGCCAAT [10927]  
Ami GACCTATGAATTGACAGACTGTGTATTCT--AAGCTTGTCTGTCATTTCTGTAGGCCAAT [12235]  
Asi GACCTATGAATTGACAGACTGTGTATTCT--AAGCTTGTCTGTCATTTCTGTAGGCCAAT [11583]  
Tgu GACCTATGAATTGACAGACTGTCTTTT----GCATTTGCCTGTCACCTTCTATAGGCCAAT [9418]  
Cli GACCTATGAATTGACAGACTGCTTTTCT----AAACTTGCCTGTCATTTCTATAGGCCAAT [11801]  
Gga GACCTATGAATTGACAGACTGCTTTTCA----AAATGTGCCTGTCATTTCTATAGGCCAAT [10530]  
Xtr GACCTATGAAATGACAGCCA-CTTCCATACCAAACATGTCTGTCATTTCTGTAGGCCAAT [11399]  
Lch GACCTATGAATTGACAGCCAGTGAAGTTGATGAATTTGTCTGTCAGTTCTATAGGCCACT [12521]  
Dre ----- [11495]

Hsa ATTCTGTATGAC--ATGGGAGCTGAGGGCTGGGTCTTTGCGGGCGAGATGAGGG----- [12154]  
Mmu ATTCTGTATGTC--ACGGGAGCTGAGAGCTGGGTCTTTGCGGGCAAGATGAGAG----- [11988]  
Mdo GCCTTGTATGTC--ACGGGAGTTGAGGATTGGGTCTTTGTGGGCGAGATGAGGG----- [11453]  
Meu -----ACGGGAGTTGAGGACTGGGTCTTTGCGGGCGAGATGAGGG----- [9970]  
Oan GTTCTGCATGCC----- [10720]  
Aca ACTCTGTACGCC--TTGGGGGTCTGGGCCTGGGTCTTTGCGGGCGAGATGAGAAGTTT-- [12147]  
Pbi ACTCTGCATATC--CTGGGAGTTTGGGGCTGGGTCTTTGCGGGCGAGATGAGAAGTT-- [12357]  
Cpi ATTCTGCATGCC--GGGCGAGTCTAGGGCTGGGTCTTTGCGGGCGAGATGAGAGGTT-- [12964]  
Cmy ATTCTGCATGCC--GGGCGAGTCTAGGGCTGGGTCTTTGCGGGCGAGATGAGAGGTT-- [12712]  
Psi TTTCTGTATGCC--GGGTGAGTCTAGGGCTGGGTCTTTGCGGGCGAGATGAGAGGTT-- [11576]  
Asp TTTCTGAATGCC--GGGTGAGTCTAGGGCTGGGTCTTTGCGGGCGAGATGAGAGGTT-- [10982]  
Ami ATTCTGCACACC--ATGCGAGCTGAGGGCTGGGTCTTTGCGGGCGAGGTGAGAGGTT-- [12290]  
Asi ATTCTGCACACC--ATGCGAGCTGAGGGCTGGGTCTTTGCGGGCGAGGTGAGAGGTT-- [11638]  
Tgu ATTCTGTGCACT-----GCTGGGTCTTTGCGGGCGAGATGAGAGGTT-- [9460]  
Cli ATTCTGCACACT--GGGCGAGCTGAGGGCTGGGTCTTTGCGGGCGAGATGAGAGGTT-- [11856]  
Gga ATTCTGTGCACT--GGGCGAGCTGAGGGCTGGGTCTTTGCGGGCGAGATGAGAGGTT-- [10585]  
Xtr ATTCTGATTGCT----- [11411]  
Lch ATTCTGTATCCA--ATGTGGGTTTGGGGCTGGGTCTTTGCGGGCGAGATGAGGTCAGT-- [12577]  
Dre -----TAATGTGTTAGAGGTTGGGTCTTTGCGGGCAAGGTGAGTAGTTAAA [11541]

Hsa TGTGCGATCAACTGGCCTACAAAGTCCCAGTTCTCGGCCCCC--AAGAAAAATGAGGGAC [12212]  
Mmu TGTGAGTTCAACTGGCCTACAAAGTCCCAGTCTCGGTCCCC--AAGAAAAATGAGGGAC [12046]  
Mdo TGTGAGTTCAACTGGCCTACAAAGTCCCAGTTCTCGGTTCCC----- [11495]  
Meu TGTCAATTCAACTGGCCTACAAAGTCCCAGTTCTCGGTTCCC--AAGAAAAAGGAGGGAC [10028]  
Oan -----AAGAAAAATGAGGGAC [10736]  
Aca CCTGCCTTCAACTGGCCTACAAAGTCCCAGTCTCGGCCCTT--AAGAAAAATGAGGGAC [12205]  
Pbi TCTGCCTTCAACTGGCCTACAAAGTCCCAGTTCTCGGCTCTT--AAGAAAAATGAGGGAC [12415]  
Cpi TGTGGATTCAACTGGCCTACAAAGTCCCAGTTCTCGGCTCCC--AAGAAAAATGAGGGAC [13022]  
Cmy TGTGCATTCAACTGGCCTACAAAGTCCCAGTTCTCGGCTCCC--AAGAAAAATGAGGGAC [12770]  
Psi TGTGGATTCAACTGGCCTACAAAGTCCCAGTTCTCGGCTCCC--AAGAAAAATGAGGGAC [11634]  
Asp TGTGGATTCAACTGGCCTACAAAGTCCCAGTTCTCGGCTCCC--AAGAAAAATGAGGGAC [11040]  
Ami CGTGCCTTCAACTGGCCTACAAAGTCCCAGTTCTCGGCTCCC--AAGAAAAATGAGGGAC [12348]  
Asi CGTGCCTTCAACTGGCCTACAAAGTCCCAGTTCTCGGCTCCC--AAGAAAAATGAGGGAC [11696]  
Tgu CCTGTCTTCAACTGGCCTACAAAGTCCCAGTTCTCGGCTCCC--AAGAAAAATGAGGGAC [9518]  
Cli CATGTCTTCAACTGGCCTACAAAGTCCCAGTTCTCGGCTCCC--AAGAAAAATGAGGGAC [11914]  
Gga CGTGTCTTCAACTGGCCTACAAAGTCCCAGTTCTCGGCTCCC--AAGAAAAATGAGGGAC [10643]  
Xtr ----- [11411]  
Lch TCTTCAATCAACTGGCCTACAAAGTCCCAGTTCTCAGCTCAT--AAGAAAAATGAGGGAC [12635]  
Dre TTTACTCTCAACTGGCCTACAAAGTCCCAGTTTCTGGCTCAT--AAGAAAAATGAGGGAC [11599]

Hsa TTTTCAGGGGCGACTGTGTTTT--CTGACTCAGTCATAATGCCCTAAAAATCCTTATTGTT [12271]



---

|     |                                                                 |         |
|-----|-----------------------------------------------------------------|---------|
| Mmu | TTTCAGGGGCAGCTGTGTTTC-CTGACTCAGTCATAATGCCCCATAAAAATCCTTATTGTT   | [12105] |
| Mdo | -----                                                           | [11495] |
| Meu | TTTCAGGGGCAGCTGTGTTTTATTAACCTCAGTCATAATGCCCCATAAAAATCCTTATTGTT  | [10088] |
| Oan | TTTCAGGGGCAGCTGTGTTTTACTGACCCAGTCATAATGCCCCATAAAAATCCTTATTGTT   | [10796] |
| Aca | TTTCAGGGGCAGCTGTGTTTTACTAACCCAGTCATAATGCCCCATAAAAATCCTTATTGTT   | [12265] |
| Pbi | TTTCAGGGGCAGCTGTGTTTTACTAACCCAGTCATAATGCCCCATAAAAATCCTTATTGTT   | [12475] |
| Cpi | TTTCAGGGGCAGCTGTGTTTTACTAACCCAGTCATAATGCCCCATAAAAATCCTTATTGTT   | [13082] |
| Cmy | TTTCAGGGGCAGCTGTGTTTTACTAACCCAGTCATAATGCCCCATAAAAATCCTTATTGTT   | [12830] |
| Psi | TTTCAGGGGCAGCTGTGTTTTACTAACCCAGTCATAATGCCCCATAAAAATCCTTATTGTT   | [11694] |
| Asp | TTTCAGGGGCAGCTGTGTTTTACTAACCCAGTCATAATGCCCCATAAAAATCCTTATTGTT   | [11100] |
| Ami | TTTCAGGGGCAGCTGTGTTTTACTAACCCAGTCATAATGCCCCATAAAAATCCTTATTGTT   | [12408] |
| Asi | TTTCAGGGGCAGCTGTGTTTTACTAACCCAGTCATAATGCCCCATAAAAATCCTTATTGTT   | [11756] |
| Tgu | TTTCAGGGGCAGCTGTGTTTTACTAACCCAGTCATAATGCCCCATAAAAATCCTTATTGTT   | [9578]  |
| Cli | TTTCAGGGGCAGCTGTGTTTTGCTAACCCAGTCATAATGCCCCATAAAAATCCTTATTGTT   | [11974] |
| Gga | TTTCAGGGGCAGCTGTGTTTTACTAACCCAGTCATAATGCCCCATAAAAATCCTTATTGTT   | [10703] |
| Xtr | -----                                                           | [11411] |
| Lch | TTTTAGGGGCAGCTGTGTTTTGCTAACCCAGTCATAATGCCCCATAAAAATCCTTATTGTT   | [12695] |
| Dre | TTTTAGGGGCAGCTGTGTTTTATTAACCCAGTCATAATGCCCCATAAAAATCCTTATTGTT   | [11659] |
|     |                                                                 |         |
| Hsa | C--GTGGTCTCAGAAATCGGGGTTTTGAGGGCGAGATGAGTTT-ATGTTTTATCCAACCTGG  | [12328] |
| Mmu | C--GTGGGCCCAGAAATCGGGGTTTTGAGGGCGAGATGAGTTT-GTGTTTTTATCCAACCTGG | [12162] |
| Mdo | ---GTGATTCCAGAGTCGGGGTTTTGAGGGCGAGATGAGTTT-ATGTTTTATCCAACCTGG   | [11551] |
| Meu | C-----                                                          | [10089] |
| Oan | C--GTGATTCCAGAGTCGGGGTTTTGAGGGCGAGATGAGTTT-GTGTTTTTATCCAACCTGG  | [10853] |
| Aca | C-----                                                          | [12266] |
| Pbi | C--GTGAATCCGGGGCCGGGGCTTTGGGGCGAGATGAGCTT-GCCCGGTATCCAACCTGG    | [12532] |
| Cpi | C--GTGGTTCAGAGTCGGGGTTTTGAGGGCGAGATGAGCTT-ATGTTTTATCCAACCTGG    | [13139] |
| Cmy | C--GTGGTTCAGAGTCGGGGTTTTGAGGGCGAGATGAGCTT-ATGTTTTATCCAACCTGG    | [12887] |
| Psi | C--GTGGTTCAGAGTCGGGGTTTTGAGGGCGAGATGAGCTT-ATGTTTTATCCAACCTGG    | [11751] |
| Asp | C--GTGGTTCAGAGTCGGGGTTTTGAGGGCGAGATGAGCTT-ATGTTTTATCCAACCTGG    | [11157] |
| Ami | C--GTGGTTCAGAGTCGGGGTTTTGAGGGCAAGATGAGCTT-ATGTTTTATCCAACCTGG    | [12465] |
| Asi | C--GTGGTTCAGAGTCGGGGTTTTGAGGGCAAGATGAGCTT-ATGTTTTATCCAACCTGG    | [11813] |
| Tgu | C--GTGGTTCAGAGTCGGGGTTTTGAGGGCGAGATGAGCTT-ATGTTTTATCCAACCTGG    | [9635]  |
| Cli | C--GTGGTTCAGAGTCGGGGTTTTGAGGGCGAGATGAGCTT-ATGTTTTATCCAACCTGG    | [12031] |
| Gga | C--GTGGTTCAGAGTCGGGGTTTTGAGGGCGAGATGAGCTT-ATGTTTTATCCAACCTGG    | [10760] |
| Xtr | ---GTGGTTTTCCGAGTCGGGATTTTTGAGGGCGAGATGAGCTA-ATGATTATCCAACCTGG  | [11467] |
| Lch | C--GTGGTTCCAAACCTCGGGGTTTTGAGGGCCGGATGAGCTG-ATTTTTAATCCAACCTGG  | [12752] |
| Dre | C--GTGATTTCAGTGACGGGACTTTGGGGCGAGATGAGTATTGATCTCTATCCAACCTGG    | [11717] |
|     |                                                                 |         |
| Hsa | CCCTCAAAGTCCCCTTTTTGG-GGTCA--AGGGAAAATGAGGGACTTTTTGGGGCAGATG    | [12385] |
| Mmu | CCCACAAAGTCCCCTTTTTGG-GGTCA--AGGGAAAATGAGGGACTTTTTGGGGCAGATG    | [12219] |
| Mdo | CCCACAAAGTCCCCTTTTTGGTGGTCA--AGGGAAAATGAGGGACTTTTTGGGGCAGATG    | [11609] |
| Meu | -----AGGGAAAATGAGGGACTTTTTGGGGCAGATG                            | [10120] |
| Oan | CCCACAAAGTCCCCTTTTTGGTGGTCA--AGGGAAAATGAGGGACTTTTTGGGGCAGATG    | [10911] |
| Aca | -----                                                           | [12266] |
| Pbi | CCCACAAAGTCCCCTTCTGG-GGTCA--AGGGAAAATGAGGGACTTTTTGGGGCAGCTG     | [12589] |
| Cpi | CCCACAAAGTCCCCTTTTTGGTGGTCA--AGGGAAAATGAGGGACTTTTTGGGGCAGATG    | [13197] |
| Cmy | CCCACAAAGTCCCCTTTTTGGTGGTCA--AGGGAAAATGAGGGACTTTTTGGGGCAGATG    | [12945] |
| Psi | CCCACAAAGTCCCCTTTTTGGTGGTCA--AGGGAAAATGAGGGACTTTTTGGGGCAGATG    | [11809] |
| Asp | CCCACAAAGTCCCCTTTTTGGTGGTCA--AGGGAAAATGAGGGACTTTTTGGGGCAGATG    | [11215] |
| Ami | CCCACAAAGTCCCCTTTTTGGTGGTCA--AGGGAAAATGAGGGACTTTTTGGGGCAGTTG    | [12523] |
| Asi | CCCACAAAGTCCCCTTTTTGGTGGTCA--AGGGAAAATGAGGGACTTTTTGGGGCAGTTG    | [11871] |
| Tgu | CCCACAAAGTCCCCTTTTTGGTGGTCA--AGGGAAAATGAGGGACTTTTTGGGGCAGATG    | [9693]  |
| Cli | CCCACAAAGTCCCCTTTTTGGTGGTCA--AGGGAAAATGAGGGACTTTTTGGGGCAGATG    | [12089] |
| Gga | CCCACAAAGTCCCCTTTTTGGTGGTCA--AGGGAAAATGAGGGACTTTTTGGGGCAGATG    | [10818] |
| Xtr | CCCGCAAAGTCCCCTTCTGGAAGTCA--AGGGAAAATGAGGGACTTTTTGGGGCAGATG     | [11525] |
| Lch | CCCGCAAAGTCCCCTTTTTGGAAGTCA--AGGGAAAATGAGGGACTTTTTGGGGCAGATG    | [12810] |

Dre CCCGCAAAGTCCCCTTCTGGGACTCA--AGGGAGAATGAGGGGCTTTTGGGGGCACTTG [11775]

Hsa TGTTTCCAT-TCCACTATCATAATGCCCTAAAAATCCTTATTGCT--GGTCCC GCCCCC [12442]  
Mmu TGTTTCCAT-TCCGCTATCATAATGCCCTAAAAATCCTTATTGCT--GGCTCCCACCCCT [12276]  
Mdo TGTTTCCAT-TACTACTATCATAATGCCCTAAAAATCCTTATTGCT----- [11654]  
Meu TGTTTCCAT-TACTACTATCATAATGCCCTAAAAAGCGTTATTGCT--GGCGCTCACTCC [10177]  
Oan TGTTTCCAT-TGCACTATCATAATGCCCTAAAAATCCTTATTGCT--GGAGCCCACCCC [10968]  
Aca -----GGTCCCATCGG [12278]  
Pbi TGTT-CTTC-CATGCTACCATAATGCCCTAAAAATCCTTATTGCT--GGTGTCTATCGG [12645]  
Cpi TGTTTCCAT-TACTACTATCATAATGCCCTAAAAATCCTTATTACT--GATGCCTATTGG [13254]  
Cmy TGTTTCCAT-TACTACTATCATAATGCCCTAAAAATCCTTATTACT--GATGCCTAATGG [13002]  
Psi TGTTTCCAT-TACTACTATCATAATGCCCTAAAAATCCTTATTACT--GATGCCTATTGG [11866]  
Asp TGTTTCCAT-TACTACTATCATAATGCCCTAAAAATCCTTATTACT--GATGCCTATTGG [11272]  
Ami TGTTTCCAT-TACTACTATCATAATGCCCTAAAAATCCTTATTGCT--GGTGTCCATCCG [12580]  
Asi TGTTTCCAT-TACTACTATCATAATGCCCTAAAAATCCTTATTGCT--GGTGTCCATCCG [11928]  
Tgu TGTTTCCAT-TACTACTATCATAATGCCCTAAAAATCCTTATTGCT----- [9738]  
Cli TGTTTCCAT-TACTACTATCATAATGCCCTAAAAATCCTTATTGCT----- [12134]  
Gga TGTTTCCAT-TACTACTATCATAATGCCCTAAAAATCCTTATTGCT----- [10863]  
Xtr TGTTTCACT-TACTACTACCATAATGCCCTAAAAATCCTTATTGTT--GATGCTCATAAC [11582]  
Lch TGTTTCAGTGTACTACTATCATAATGCCCTAAAAATCCTTATTGCT--AGTGTGCTTCAG [12868]  
Dre TGTTTCAGT-TTACCATCATAATGCCCTAAAAATCCTTATTGCT--GGTGTGACTGC [11832]

Hsa CTGTAACAGCAACTCCATGTGGAAGT--GCCCACTGGTTCAGTGGGGCTGCTGTTATCT [12500]  
Mmu CTGTAACAGCAACTCCATGTGGAAGT--GCCCACTGGTTCAGTGGGGCTGCTGTTATCT [12334]  
Mdo ----- [11654]  
Meu CTGTAACAGCAACTCCATGTGGGACA--GCTTCCTGCTTCCAGTGGGGGTGCTGTTACCT [10235]  
Oan TTGTAACAGCAACTCCATGTGGAAGG--GTCTCCTGGTTCAGTGGAGCTGCTGTTATCT [11026]  
Aca CTGTAACAGCAACTCCATGTGGAAGC--AGTCCGGCCGTTCAGTGGAGCGGCTGTTATAG [12337]  
Pbi CTGTAACAGCAACTCCATGTGGAAGC--ATGAGGCAGTTCCTCGTGGGGGGGCTGTTATTT [12703]  
Cpi ATGTAACAGCAACTCCATGTGGAAGGTTTCATCCCTTTTCCAGTGGGGCTGCTGTTATTT [13314]  
Cmy ATGTAACAGCAACTCCATGTGGAAGGTTTCATCCTGTTTCCAGTGGGGCTGCTGTTATTT [13062]  
Psi ATGTAACAGCAACTCCATGTGGAAGGTTTCATTCTGTTTCCAGTGGGGCTGCTGTTATTT [11926]  
Asp ATGTAACAGCAACTCCATGTGGAAGGTTTCATCCTGTTTCCAGTGGGGCTGCTGTTATTT [11332]  
Ami CTGTAACAGCAACTCCATGTGGGAGG--GGTCCGTGGTCCCCGTGGGGCTGCTGTTATTC [12638]  
Asi CTGTAACAGCAACTCCATGTGGGAGG--GGTCCGTGGTCCCCGTGGGGCTGCTGTTATTC [11986]  
Tgu ----- [9738]  
Cli ----- [12134]  
Gga ----- [10863]  
Xtr CTGTAACAGCAACTCCATGTGGAAGT--AGATATAATATTCCGGTGGAGATGCTGTTATCT [11641]  
Lch GTGTAACAGCAACTCCATGTGGATGG----CAATGGCTTCCAGTGGAGCTGCTGTTACTTT [12924]  
Dre TTGTAACAGCAACTCCATGTGGAAGG---TTTGTGTCTTCCAGTGGAGCTGCTGTTGCGT [11889]

Hsa GG-GGCGAGGGCC--TGGTGT-TATCAAGTGTAACAGCAACTCCATGTGGACTGTGTACC [12556]  
Mmu GG-GGTGGCGGCT--TGGAGT-CATCGGGTGTAACAGCAACTCCATGTGGACTGTGCTC- [12389]  
Mdo ----- [11654]  
Meu TG-GGTGGGCAGC----- [10247]  
Oan TG-GGTGGGTCAT--CAGTGT-TATCATATGTAACAGCAACTCCATGTGGATTAT--GCT [11080]  
Aca TC-GGTGGGGGCT--CAGTGT-CGTCAAGTGTAACAGCAACTCCATGTGGAATAA--GTA [12391]  
Pbi TG-GATGGGCACT--CGGTGT-TATCAAGTGTAACAGCAACTCCATGTGGAATAA--GCC [12757]  
Cpi TT-GATAGGCTGT--CAGTGT-TATCAGATGTAACAGCAACTCCATGTGGACTAC--ACT [13368]  
Cmy TT-GATAGGCTGT--CAGTAT-TATCAGATGTAACAGCAACTCCATGTGGACTAC--ACT [13116]  
Psi TT-GATAGGCTAT--CAGTGT-TATCAGATGTAACAGCAACTCCATGTGGACTAC--ACC [11980]  
Asp TT-GATAGGCCAT--CAGTGT-TATCAGATGTAACAGCAACTCCATGTGGACTAC--ACC [11386]  
Ami TG-GACGGGCACC--CAGTAC-TTTCAAATGTAACAGCAACTCCATGTGGACTAC--GCT [12692]  
Asi TG-GACGGGCACC--CAGTAC-TTTCAAATGTAACAGCAACTCCATGTGGACTAC--GCT [12040]  
Tgu -----TGGTGC-TCTCATATGTAACAGCAACTCCATGTGGACTAC--ACT [9780]  
Cli -----GGGCGC-TCTCAGATGTAACAGCAACTCCATGTGGACTAC--ACT [12176]

Gga -----TGGTGC-TCTCATATGTAACAGCAACTCCATGTGGACTAC--ACT [10905]  
Xtr GT-AATGTGTATC--TAGTGTGTATCAGGTGTAACAGCAACTCCATGTGGACTTG--TCC [11696]  
Lch TT-GATGGGCACT--CAGTGTGCTTCAGGTGTAACAGCAACTCCATGTGGATGGC--AAT [12979]  
Dre GCAGATAGTCACC----- [11902]

Hsa AATTTCCAGTGGAGATGCTGTTACTTTTGATGGTTACCAA--GCTGAGTGAATTAGGTAG [12614]  
Mmu GGATTCCAGTGGAGCTGCTGTTACTTCTGATGGCCTCCAA--GTTGAGTGAAGTAGGTAG [12447]  
Mdo -----GCTCAGTGGGTTAGGTAG [11672]  
Meu -----GCTCAGTGGGTTAGGTAG [10265]  
Oan GATTTCCAGTGGAGAGGCTGTTACTTTTGATGGAACTGG----- [11120]  
Aca GATTTCCAGTGGAGGTGCTGTTACTTTTGAA-GCTACTGA--GTTCTGTGGATTAGGTAG [12448]  
Pbi TCTTTCCAGTGGAGGTGGTGTACTTTTGAAAGCCACTGA--GTTCTGTGAATTAGGTAG [12815]  
Cpi GACTTCCAGTGGAGATGCTGTTACTTTTGATATCTACTGA--GCTTTGTGAATTAGGTAG [13426]  
Cmy GACTTCCAGTGGAGATGCTGTTACTTTTGATATCTACTGA--GCTCTGTGAATTAGGTAG [13174]  
Psi AACTTCCAGTGGAGATGCTGTTACTTTTGATATCTACTGA--GCTTTGTGAATTAGGTAG [12038]  
Asp AACTTCCAGTGGAGATGCTGTTACTTTTGATATCTACTGA--GCTTTGTGAATTAGGTAG [11444]  
Ami GACTTCCAGTGGAGATGCTGTTACTTTTGACAGCCACTCA--GCTTTGTGAATTAGGTAG [12750]  
Asi GACTTCCAGTGGAGATGCTGTTACTTTTGACAGCCACTCA--GCTTTGTGAATTAGGTAG [12098]  
Tgu GACTTCCAGTGGAGATGCTGTTACTTTTGATGGTCACTCA----- [9820]  
Cli GACTTCCAGTGGAGATGCTGTTACTTTTGATAGCCTCTCA--GCTCTGTGAATTAGGTAG [12234]  
Gga GACTTCCAGTGGAGATGCTGTTACTTTTGATAGCGGCTCA--GCTCTGTGAATTAGGTAG [10963]  
Xtr GTATTCCAGTGGAGATGCTGTTACTTTTGATGGGCACTTA----- [11736]  
Lch GGCTTCCAGTGGAGCTGCTGTTACTTTTGATGGGCACTAA--GCGGTGTGTTTAGGTAG [13037]  
Dre -----GGTCTGTGATTAGGTAG [11920]

Hsa TTTTCATGTTGTTGGGCTGGGTTTCTGA--ACACAACAACATTAACCACCCGATTTCACG [12672]  
Mmu TTTTCATGTTGTTGGGCTGGCTTTCTGA--ACACAACGACATCAAACCACCTGATTTCATG [12505]  
Mdo TTTTCCTGTTGTTGGGCTTAGATTTCTAA--ACACAAGAACATCAAACCACCTGATTCACT [11730]  
Meu TTTTCCTGTTGTTGGGCTTAGATTTCTAA--ACACAAGAACATCAAACCACCTGATTCACT [10323]  
Oan ----- [11120]  
Aca TTTTCACGTTGTTGGGAATTCATTTTTAAC-ACACAAGAACATAAAAACCTGATTACT [12507]  
Pbi TTTTCACGTTGTTGGGAATTCATTTTTAAT-ACACAAGAACATAAAAACCTGATTACT [12874]  
Cpi TTTTCATGTTGTTGGGGTTTTATTTTTAA--ACACAAGAACATAAAAACCTGATTACT [13484]  
Cmy TTTTCATGTTGTTGGGGTTTTATTTTTAA--ACACAAGAACATAAAAACCTGATTACT [13232]  
Psi TTTTCATGTTGTTGGGCTTCTAGTTTTTTAAACACAAGAACATAAAAACCTGATTACT [12098]  
Asp TTTTCATGTTGTTGGGCTTCTAGTTTTTTAAACACAAGAACATAAAAACCTGATTACT [11504]  
Ami TTTTCATGTTGTTGGGCTTTTTATTTTTAA--ACACAAGAACATAAAAACCTGATTACT [12808]  
Asi TTTTCATGTTGTTGGGCTTTTTATTTTTAA--ACACAAGAACATAAAAACCTGATTACT [12156]  
Tgu ----- [9820]  
Cli TTTTCATGTTGTTGGGCTTTTTAATTTTTAA--ACACAAGAACATCAAACCTGATTACT [12292]  
Gga TTTTCATGTTGTTGGGCTTTAAATTTTTAA--ACACAAGAACATCAAACCTGATTACT [11021]  
Xtr ----- [11736]  
Lch TTTTCATGTTGTTGGGCTTTTT-TTTTTAA--TCACAGGAACATCAAACCTGCCTGAATTACT [13094]  
Dre TTTTCAAGTTGTTGGGCTGGACGTTTTAAT-TTCACAGGAACCTGAAACCTGCCTGAATTGCT [11979]

Hsa GCAGTT-ACT--TGATCTGTGGCTTAGGTAGTTTCATGTTGTTGGGATTGAGTTTTG--A [12727]  
Mmu GCAGTT-ACT--TGATCTGTGGCTTAGGTAGTTTCATGTTGTTGGGATTGAGTTTTG--A [12560]  
Mdo GCAGTT-ACT----- [11739]  
Meu GCAGTT-ACT----- [10332]  
Oan -----TGGTCTGTGGCTTAGGTAGTTTCATGTTGTTGGGATTGAATTTTTG--A [11166]  
Aca CCAGTTTATT--TGATCCGTGGTTTTAGGTAGTTTCATGTTGTTGGGGTTGGCTTTTT--A [12562]  
Pbi CCAGTTTATT--TGTTCCGTGGTTTTAGGTAGTTTCATGTTGTTGGGGTTGGCTTTTT--A [12929]  
Cpi CCAGTT-ATT--TGATCTGTGGTTTTAGGTAGTTTCATGTTGTTGGGATTGGCTTTTT--A [13538]  
Cmy CCAGTT-ATT--TGATCTGTGGTTTTAGGTAGTTTCATGTTGTTGGGATTGGCTTTTT--A [13286]  
Psi CCAGTT-ATT--TGATCTGTGGTTTTAGGTAGTTTCATGTTGTTGGGATTGGCTTTTT--A [12152]  
Asp CCAGTT-ATT--TGATCTGTGGTTTTAGGTAGTTTCATGTTGTTGGGATTGGCTTTTT--A [11558]  
Ami CCAGTT-ATT--TGATCTGTGGTTTTAGGTAGTTTCATGTTGTTGGGATTGGCTTTTT--A [12862]

Asi CCAGTT-ATT--TGATCTGTGGTTTAGGTAGTTTCATGTTGTTGGGATTGGCTTTT---A [12210]  
Tgu -----TGATCTGTGGTTTAGGTAGTTTCATGTTGTTGGGATGGGCTTTA---G [9865]  
Cli CCAGTT-ATC--TGATCTGTGGTTTAGGTAGTTTCATGTTGTTGGGATTGGCTTTT---A [12346]  
Gga CCAGTT-ATC--TGATCTGTGGTTTAGGTAGTTTCATGTTGTTGGGATTGGCTTTT---A [11075]  
Xtr -----TGATCTGTGGTTTAGGTAGTTTCATGTTGTTGGGATTGCTTTTTTCTTA [11784]  
Lch CCAGTT-ACC--TGATCTGTGGTTTAGGTAGTTTCATGTTGTTGGGATTGGCTTTT---A [13148]  
Dre CCAGTT-AAA--TGGTGCCTGGTTTAGGTAGTTTCATGTTGTTGGGATTGGCTTCC--TG [12034]

Hsa ACTCGGCAACAAGAAACTGCCTGAGTTACATCAGTCGGT--TGGTCGGTGATTTAGGTAG [12785]  
Mmu ACTCGGCAACAAGAAACTGCCTGAGTTACATCAGTCGGT--TGGTCGGTGATTTAGGTAG [12618]  
Mdo -----TGGTCTGTGATTTAGGTAG [11758]  
Meu ----- [10332]  
Oan ACTCGGCAACAAGAAACTGTCTGAGTTACATCAGTCGGT--TGGTCTGTGATTTAGGTAG [11224]  
Aca ACTCGGCAACAAGAAACTGCCTTAATTACGTCAGTTAGT--TGGTCGGTGATTTAGGTAG [12620]  
Pbi ACTCGGCAACAAGAAACTGCCTTAATTACGTCAGTTAGT--TGGTCGGTGATTTAGGTAG [12987]  
Cpi GCTCGGCAACAAGAAACTGCCTTAATTACGTCAGTTAGT--TGTCTGTAGTTTAGGTAG [13596]  
Cmy GCTCGGCAACAAGAAACTGCCTTAATTACGTCAGTTAGT--TGTCTGTGGTTTAGGTAG [13344]  
Psi GCTCGGCAACAAGAAACTGCCTTAATTACGTCAGTTAGT--TGGTCAGTGGTTTAGGTAG [12210]  
Asp GCTCGGCAACAAGAAACTGCCTTAATTACGTCAGTTAGT--TGGTCAGTGGTTTAGGTAG [11616]  
Ami GCTCGGCAACAAGAAACTGCCTTAATTACGTCAGTTAGT--TGCTGTGTGGTTTAGGTAG [12920]  
Asi GCTCGGCAACAAGAAACTGCCTTAATTACGTCAGTTAGT--TGCTGTGTGGTTTAGGTAG [12268]  
Tgu GCTCGGCAACAAGAAACTGCCTTAATTACGTCAGTTTCGT--TGCTCTGTGGTTTAGGTAG [9923]  
Cli GCTCGGCAACAAGAAACTGCCTTAATTACGTCAGTTAGT--TGCTCTGTGGTTTAGGTAG [12404]  
Gga GCTCGGCAACAAGAAACTGCCTTAATTACGTCAGTTAGT--TGCTCTGTGGTTTAGGTAG [11133]  
Xtr ACGCGGCAACAAGAAACTGCCTTAATTACGTCAGTTTCGT--CGCTGTGTGGTTTAGGTAG [11842]  
Lch ACTCGGCAACAAGAAACTGCCTTAATTACGTCAGTTTCGT--TGAAGTGTGATTTAGGTAG [13206]  
Dre GCTCGACAACAAGAAACTGCCTTGATTACGTCAGTTTCGT--TGTCGAGTGGTTTAGGTAG [12092]

Hsa TTTCTGTGTTGGGAT-----CCACCTTTCTCTC--GACAGCACGACACTGCCTTCATT [12838]  
Mmu TTTCTGTGTTGGGAT-----CCACCTTTCTCTC--GACAGCACGACACTGCCTTCATT [12671]  
Mdo TTTCTGTGTTGGGGC----TCCACCTTTCTCTC--GACAGCACGATACTGCCTTCATT [11812]  
Meu ----- [10332]  
Oan TTTCTGTGTTGGGGCT----CCACCTTTCTCTC--GACAGCACGACACTGCCTTCATT [11278]  
Aca TTTTCATGTTGTTGGGGCTATGGCTCTCTCTTTCTC--GACAGCACGAAACTGCCTTCATT [12678]  
Pbi TTTCTCGTTGTTGAGGCT--GAACATTTCTCTCTC--TGCAGCACGAAACTGCCTTCATC [13043]  
Cpi TTTTCATGTTGTTGGGGCT----CCACCTTTCTCTC--TGCAGCACGAAACTGCCTTAATT [13650]  
Cmy TTTTCATGTTGTTGGGGCT----CCACCTTTCTCTC--TGCAGCACGAAACTGCCTTAATT [13398]  
Psi TTTTCATGTTGTTGGGGCT----CCACCTTTCTCTC--TGCAGCACGAAACTGCCTTGATT [12264]  
Asp TTTTCATGTTGTTGGGGCT----CCACCTTTCTCTC--TGCAGCACGAAACTGCCTTGATT [11670]  
Ami TTTTCATGTTGTTGGGGCT----CCACCTTTCTCTC--TACAGCACGAAACTGCCTTAATT [12974]  
Asi TTTTCATGTTGTTGGGGCT----CCACCTTTCTCTC--TACAGCACGAAACTGCCTTAATT [12322]  
Tgu TTTTCATGTTGTTGGGGCT----CCACCTTTCTCTC--TACAGCACGAAACTGCCTTAATT [9977]  
Cli TTTTCATGTTGTTGGGGCT----CCACCTTTCTCTC--TACAGCACGAAACTGCCTTAATT [12458]  
Gga TTTTCATGTTGTTGGGGCT----CCACCTTTCTCTC--TACAGCACGAAACTGCCTTAATT [11187]  
Xtr TTTTATGTTGTTGGGCAT----TCACCTTTCTCTC--TACAACAAGAAACTGCCTTAATT [11896]  
Lch TTTTCATGTTGTTGGGGCT----CCAAATTTATCTC--TATAACAAGAAACTGCCTGAATT [13260]  
Dre TTTTCATGTTGTTGGGAT-----TACATTCAAACTC--TGCAACGTGAAACTGTCTTAATT [12145]

Hsa ACTTCAGTTG--CCGGCCCCGCCAACCCAGTGTTCAGACTACCTGTTTCAGGAGGCTCTCA [12896]  
Mmu ACTTCAGTTG--CCATCCCCGCCATCCCAGTGTTCAGACTACCTGTTTCAGGAGGCTGG-G [12728]  
Mdo ACTTCAGTTG--CCAGCCCCACCAGCCCAGTGTTCAGACTACCTGTCCAGGAGATTGCAA [11870]  
Meu -----CCAGCCCCACCAGCCCAGTGTTCAGACTACCTGTCCAGGAGATTGCAA [10380]  
Oan ACTTCAGTTG----- [11288]  
Aca ACTTCAGTTT--CCAGCCCCGCTTCCCAGTGTTCAGACTACCTGTTTCAGGAAGCTACAA [12736]  
Pbi ACTTCAGTTT--CTGGCCCCACCTGCCAGTGTTCAGACTACCTGTTTCAGGAAACTACAA [13101]  
Cpi ACTTCAGTTG--CCAGCCCAGCTGCCAGTGTTCAGACTACCTGTTTCAGGAGGCTATCA [13708]  
Cmy ACTTCAGTTG--CCAGCCCAGCTGCCAGTGTTCAGACTACCTGTTTCAGGAGGCTATAA [13456]

Psi ACTTCAGTTA--CCAGCCCAGCCTGCCAGTGTTCAGACTACCTGTTTCAGGAGGCTATAA [12322]  
Asp ACTTCAGTTG--CCAGCCCAGCCTGCCAGTGTTCAGACTACCTGTTTCAGGAGGCTATAA [11728]  
Ami ACTTCAGTTG--CCAGCCCAGCCTGCCAGTGTTCAGACTACCTGTTTCAGGAGCATATGA [13032]  
Asi ACTTCAGTTG--CCAGCCCAGCCTGCCAGTGTTCAGACTACCTGTTTCAGGAGCATATGA [12380]  
Tgu ACTTCAGTTG----- [9987]  
Cli ACTTCAGTTG--CCGGCCCCGGCCTGCCAGTGTTCAGACTACCTGTTTCAGGATGCTTCCC [12516]  
Gga ACTTCAGTTG----- [11197]  
Xtr ACATCAGTGG--GTGGTCCCCTTCCCCAGTGTTCAGACTACGTGTTTCGTTGGACAG--A [11952]  
Lch ACTCCAGTTA--CTGACCCCGCCTGCCAGTGTTCAGACTACCTGTTTCAGGAAGCCA--A [13316]  
Dre GCCCCAGTTT--CCCGTCCCAGCCTGCCAGTGTTCAGACTACCTGTTTCAGGAATTAGT-- [12201]

Hsa ATGTGTACAGTAGTCTGCACATTGGTTAGGCTGGGCTTGGG--CCTGCTCCGTCGCCCCA [12954]  
Mmu ACATGTACAGTAGTCTGCACATTGGTTAGGCTGGGCTTGGG--CCTGCTCCGTCGCCCCA [12786]  
Mdo AGGTGTACAGTAGTCTGCACATTGGTTAGGCTGGGCTTGGG--CCTGCTCCGTCGCCCCA [11928]  
Meu ATGTGTACAGTAGTCTGCACATTGGTTAGGCTGGGCTTGGG--CCTGCTCCGTCGCCCCA [10438]  
Oan -----CCTGCTCCGTCGCCCCA [11305]  
Aca AGGTGTACAGTAGTCTGCACATTGGTTAGACTGGGCTTGGG--CCTGCTCCGTCGCCCCA [12794]  
Pbi AGGTGTACAGTAGTCTGCACATTGGTTAGATTGGGTTTGGG--CCTGCTCCGTCGCCCCA [13159]  
Cpi AGGTGTACAGTAGTCTGCACATTGGTTAGATTGGGTTTGGT--CCTGCTCCGTCGCCCCA [13766]  
Cmy AGGTGTACAGTAGTCTGCACATTGGTTAGATTGGGTTTGGT--CCTGCTCCGTCGCCCCA [13514]  
Psi AGGTGTACAGTAGTCTGCACATTGGTTAGATTGGGTTTGGC--CCTGCTCCGTCGCCCCA [12380]  
Asp AGGTGTACAGTAGTCTGCACATTGGTTAGATTGGGTTTGGC--CCTGCTCCGTCGCCCCA [11786]  
Ami AGTTGTACAGTAGTCTGCACATTGGTTAGATCGGGCTTGGC--CCTGCTCCGTCGCCCCA [13090]  
Asi AGTTGTACAGTAGTCTGCACATTGGTTAGATCGGGCTTGGC--CCTGCTCCGTCGCCCCA [12438]  
Tgu -----CCTGCTCCGTCGCCCCA [10004]  
Cli GGTTGTACAGTAGTCTGCACATTGGTTAGATCGGATCCGGC--CCTGCTCCGTCGCCCCA [12574]  
Gga -----CCTGCTCCGTCGCCCCA [11214]  
Xtr ACCTGAACAGTAGTCTACACACTGGTTAAACTGGGCCATGC--CCTGCTCCGTCGCCCCA [12010]  
Lch AGGTGGACAGTAGTCTGCACATTGGTTAGGCTGGGCAAGAG--CCTGCTCCGTCGCCCCA [13374]  
Dre GTTTGTACAGTAGTCTGCACATTGGTTAGGCTGGATGGGGA--CCTGCTCCGTCATCCCA [12259]

Hsa GTGTTTCAGACTACCTGTTTCAGGACAATGCCGTTGTACAGTAGTCTGCACATTGGTTAGAC [13014]  
Mmu GTGTTTCAGACTACCTGTTTCAGGACAATGCCGTTGTACAGTAGTCTGCACATTGGTTAGAC [12846]  
Mdo GTGTTTCAGACTACCTGTTTCAGGACAATGCTGTTGTACAGTAGTCTGCACATTGGTTAGAC [11988]  
Meu GTGTTTCAGACTACCTGTTTCAGGACAATGCTGTTGTACAGTAGTCTGCACATTGGTTAGAC [10498]  
Oan GTGTTTCAGACTACCTGTTTCAGGACAATGCTGTTGTACAGTAGTCTGCACATTGGTTAGAC [11365]  
Aca GTGTTTCAGACTACCTGTTTCAGGACAATGCTGTTGTACAGTAGTCTGCACATTGGTTAGAC [12854]  
Pbi GTGTTTCAGACTACCTGTTTCAGGACAATGCTGTTGTACAGTAGTCTGCACATTGGTTAGAC [13219]  
Cpi GTGTTTCAGACTACCTGTTTCAGGACAATGCTGTTGTACAGTAGTCTGCACATTGGTTAGAC [13826]  
Cmy GTGTTTCAGACTACCTGTTTCAGGACAATGCTGTTGTACAGTAGTCTGCACATTGGTTAGAC [13574]  
Psi GTGTTTCAGACTACCTGTTTCAGGACAATGCTGTTGTACAGTAGTCTGCACATTGGTTAGAC [12440]  
Asp GTGTTTCAGACTACCTGTTTCAGGACAATGCTGTTGTACAGTAGTCTGCACATTGGTTAGAC [11846]  
Ami GTGTTTCAGACTACCTGTTTCAGGACAATGCTGTTGTACAGTAGTCTGCACATTGGTTAGAC [13150]  
Asi GTGTTTCAGACTACCTGTTTCAGGACAATGCTGTTGTACAGTAGTCTGCACATTGGTTAGAC [12498]  
Tgu GTGTTTCAGACTACCTGTTTCAGGACAATGCTGTTGTACAGTAGTCTGCACATTGGTTAGAC [10064]  
Cli GTGTTTCAGACTACCTGTTTCAGGACAATGCTGTTGTACAGTAGTCTGCACATTGGTTAGAC [12634]  
Gga GTGTTTCAGACTACCTGTTTCAGGACAATGCTGTTGTACAGTAGTCTGCACATTGGTTAGAC [11274]  
Xtr GTGTTTCAGACTACCTGTTTCAGGACAATGCTGTTGTACAGTAGTCTGCACATTGGTTAGAC [12070]  
Lch GTGTTTCAGACTACCTGTTTCAGGACAATACTGTTGTACAGTAGTCTGCACATTGGTTAGAC [13434]  
Dre GTGTTTCAGACTACCTGTTTCAGGATCATACTGGTGTACAGTAGTCTGCACATTGGTTAGAC [12319]

Hsa TGGGCAAGGG--TCCACTCCGTCACCCAGTGTTTAGACTATCTGTTTCAGGACTCCCAAA [13072]  
Mmu TGGGCAAGGG--TCCACTCCGTCACCCAGTGTTTAGACTACCTGTTTCAGGACTCCCAAA [12904]  
Mdo TGGGCAAGGG--TCCACTCCGTCACCCAGTGTTTAGACTATCTGTTTCAGGACTCCAATA [12046]  
Meu TGGGCAAGGG----- [10508]  
Oan TGGGCAAGGG----- [11375]  
Aca TGGGCAAGGA--TCCACTCCGTCGCCAGTGTTCGGACTACCTGTTTCAGGACTACGAGA [12912]

Pbi TGGGCAAGGG--TCCACTCCGTCTTCCCAGTGTTCGGACTACCTGTTTCAGGACTACAAGA [13277]  
Cpi TGGGCAAGGG--TCCACTCCGTCTGCCAGTGTTCAGACTACCTGTTTCAGGACTACGAGA [13884]  
Cmy TGGGCAAGGG--TCCACTCCGTCTGCCAGTGTTCAGACTACCTGTTTCAGGACTACGAGA [13632]  
Psi TGGGCAAGGG--TCCACTCCGTCTGCCAGTGTTCAGACTACCTGTTTCAGGACTACGAGA [12498]  
Asp TGGGCAAGGG--TCCACTCCGTCTGCCAGTGTTCAGACTACCTGTTTCAGGACTACGATA [11904]  
Ami TGGGCAAGGG--TCCACTCCGTCTGCCAGTGTTCAGACTACCTGTTTCAGGACTACGAGA [13208]  
Asi TGGGCAAGGG--TCCACTCCGTCTGCCAGTGTTCAGACTACCTGTTTCAGGACTACGAGA [12556]  
Tgu TGGGCAAGGG--TCCACTCCGTCTGCCAGTGTTCAGACTACCTGTTTCAGGACTACGAGA [10122]  
Cli TGGGCAAGGG--TCCACTCCGTCTGCCAGTGTTCAGACTACCTGTTTCAGGACTACGAGA [12692]  
Gga TGGGCAAGGG--TCCACTCCGTCTGCCAGTGTTCAGACTACCTGTTTCAGGACTACGAGA [11332]  
Xtr TGGGCATGGG----- [12080]  
Lch TGGGCATGGG--TCCACTCCGTCTGCCAGTGTTCAGACTACCTGTTTCAGGGGGAAAAGA [13492]  
Dre TGTGCATGGA--TCCCCCTCGCCTGCCAGTGTTCAGACTACCTGTTTCATCATGCTGCAG [12377]

Hsa TTGTACAGTAGTCTGCACATTGGTTAGGCTGGGCTGGGT--CCCGCCGTTTCCTTTTTTCCT [13130]  
Mmu TTGTACAGTAGTCTGCACATTGGTTAGGCTGGGCTGGGT--CTGGCTGTTTCCTTTTTTCCT [12962]  
Mdo TTGTACAGTAGTCTGCACATTGGTTAGGCTGGGCTGGGC----- [12085]  
Meu -----CTCGTGGTTTCCTTTTTTCCT [10527]  
Oan ----- [11375]  
Aca TTGTACAGTAGTCTGCACATTGGTTAGGCTGTGCTGGGA--CTCATTGTTTCCTTTTTTCCT [12970]  
Pbi TTGTACAGTAGTCTGCACATTGGTTAGGCTGTGCTGGGA-----TCCT [13320]  
Cpi TTGTACAGTAGTCTGCACATTGGTTAGGCTGTGCTGGGA--CTCGTTGTTTCCTTTTTTCCT [13942]  
Cmy TTGTACAGTAGTCTGCACATTGGTTAGGCTGTGCTGGGA--CTCGTTGTTTCCTTTTTTCCT [13690]  
Psi TTGTACAGTAGTCTGCACATTGGTTAGGCTGTGCTGGGA--CTCGTTGTTTCCTTTTTTCCT [12556]  
Asp TTGTACAGTAGTCTGCACATTGGTTAGGCTGTGCTGGGA--CTCGTTGTTTCCTTTTTTCCT [11962]  
Ami TTGTACAGTAGTCTGCACATTGGTTAGGCTGTGCTGGGA--CTCGTTGTTTCCTTTTTTCCT [13266]  
Asi TTGTACAGTAGTCTGCACATTGGTTAGGCTGTGCTGGGA--CTCGTTGTTTCCTTTTTTCCT [12614]  
Tgu TTGTACAGTAGTCTGCACATTGGTTAGGCTGTGCTGGGA--CTCGTTGTTTCCTTTTTTCCT [10180]  
Cli TTGTACAGTAGTCTGCACATTGGTTAGGCTGTGCTGGGA--CTCGTTGTTTCCTTTTTTCCT [12750]  
Gga TTGTACAGTAGTCTGCACATTGGTTAGGCTGTGCTGGGA--CTCGTTGTTTCCTTTTTTCCT [11390]  
Xtr -----CTCGCTGTTTCCTTTTTTCCT [12099]  
Lch TTGTACAGTAGTCTGCACATTGGTTAGGCTGTGCTGGGA--CTCGTTGTTTCCTTTTTTCCT [13550]  
Dre CTGAACAGTAGTCCGCACATTGGTTAGGCTGGGCTGGGA--CTCGCTGTTTCCTTTTTTCCT [12435]

Hsa ATGCATATACTTCTTTGAGGATCTGGCCTAAAGAGGTATAGGGCATGGGAAAACGGGGCG [13190]  
Mmu ATGCATATACTTCTTTGAGGATCTGGTCTAAAGAGGTATAGCGCATGGGAAGATGGAGCA [13022]  
Mdo ----- [12085]  
Meu ATGCATATACTTCTTTGAGAATAAAAATCTAAAGAGGCGTAGGGCATGGGAAAATGGGGCC [10587]  
Oan ----- [11375]  
Aca ATGCATATACTTCTTTGAGAATCTGATCTAAAGAGGCATACGGCATGGGAAAATGGGGCA [13030]  
Pbi ATGCATATACTTCTTTGAGAATTTGAATCTAAAGAGGCATACGGCATGGGAAAATGGGGCG [13380]  
Cpi ATGCATATACTTCTTTGAGAATTTGAACTAAAGAGGCATAGGGCATGGGAAAATGGGGCG [14002]  
Cmy ATGCATATACTTCTTTGAGAATTTGAACTAAAGAGGCATAGGGCATGGGAAAATGGGGCG [13750]  
Psi ATGCATATACTTCTTTGAGAATTTGAACTAAAGAGGCATAGGGCATGGGAAAATGGGGCG [12616]  
Asp ATGCATATACTTCTTTGAGAATTTGAACTAAAGAGGCATAGGGCATGGGAAAATGGGGCG [12022]  
Ami ATGCATATACTTCTTTGAGAATTTGGATCTAAAGAGGCATAGGGCATGGGAAAATGGGGCG [13326]  
Asi ATGCATATACTTCTTTGAGAATTTGGATCTAAAGAGGCATAGGGCATGGGAAAATGGGGCG [12674]  
Tgu ATGCATATACTTCTTTGAGAATTTGCTTCTAAAGAGGTATAGGGCATGGGAAAATGGGGCA [10240]  
Cli ATGCATATACTTCTTTGAGAATTTGATCTAAAGAGGCATAGGGCATGGGAAAATGGGGCG [12810]  
Gga ATGCATATACTTCTTTGAGAGTTTGGATCTAAAGAGGCATAGAGCATGGGAAAATGGGGCG [11450]  
Xtr ATGCATATACTTCTTTGAAAAATGAATGTAAGGGGCATAGGGCATGGGAAAATGGGGCA [12159]  
Lch ATGCATATACTTCTTTGAGAATCAGATATGAAGAGGCATAGGGCATGGGAAAATGGGGCG [13610]  
Dre ATGCATATACTTCTTTGACATGCTGCTTTAAAGAGGCATAGGGCATGGGAAAATGGGGCG [12495]

Hsa GTCGGGTC--CGCGCGCTGGGTCCAGTGGTTCTTAAACAGTTCAACAGTTCTGTAGCGCAA [13248]  
Mmu GTGAGATC--GGCGCGCCTGGTCCAGTGGTTCTTAAACAGTTCAACAGTTCTGTAGCACAA [13080]  
Mdo -----AGCTGCCCTGGTCCAGTGGTTCTTAAACAGTTCAACAGTTCTGTGTAGAGA [12135]

Meu ACGGAGCT--AGCTTCTCTGGTGCAGTGGTTCTTAAACAGTTCAACAGTTCTATTAAAAAA [10645]  
Oan -----AGTCTCCCTGGTGCAGTGGTTCTTAAACAGTTCAACAGTTCTCTGGCCTAA [11425]  
Aca ATTGAGGT--AGCCTGCTGGGTGCAGTGGTTCTTAAACAGTTCAACAGTTCTCTATTATAA [13088]  
Pbi ATTGAGGG--AGCCTGCTGGGTGCAGTGGTTCTTAAACAGTTCAACAGTTCTGTAGCATAA [13438]  
Cpi ACTGAGGT--AGCCTCCTTGGTGCAGTGGTTCTTAAACAGTTCAACAGTTCTCTAGCATAA [14060]  
Cmy ACTGAGGT--GGCCTCCTTGGTGCAGTGGTTCTTAAACAGTTCAACAGTTCTCTAGCATAA [13808]  
Psi ACTGAGGT--AGCCTCCTTGGTGCAGTGGTTCTTAAACAGTTCAACAGTTCTCTAGCATAA [12674]  
Asp ACTGAGGT--AGCCTCCTTGGTGCAGTGGTTCTTAAACAGTTCAACAGTTCTCTAGCATAA [12080]  
Ami ACTGAGGT--CGCCTCGCGGGTGCAGTGGTTCTTAAACAGTTCAACAGTTCTTTAGGCTAA [13384]  
Asi ACTGAGGT----- [12682]  
Tgu ACTGAGGT--AGCCTCCTTGGTGCAGTGGTTCTTAAACAGTTCAACAGTTCTCTAGCATAA [10298]  
Cli ACTGAGGT--AGCCTCCTTGGTGCAGTGGTTCTTAAACAGTTCAACAGTTCTCTAGCATAA [12868]  
Gga ACTGAGGT--AGCCTCCTTGGTGCAGTGGTTCTTAAACAGTTCAACAGTTCTCTATCATAA [11508]  
Xtr GCTGAGCC--TGTCTCCCTGGCCGAGTGGTTCTTAAACAGTTCAACAGTTCTCTATCGAAA [12217]  
Lch ACTGAGGT--TGTCTTTTTGGTGCAGTGGTTCTAAATAGTTCAACAGTTCTCTACCAAAA [13668]  
Dre GCAGAGGT--GGTCCCTCTGGTGCAGTGGTTCTTAAACAGTTCAACAGTTCTATCTCAAAA [12553]

Hsa TTGTGAAATGTTTAGGACCACTAGACCCGGCGGGCGCG--TGTGACTCGTGGACTTCCCT [13306]  
Mmu TTGTGAAATGTTTAGGACCACTAGACCCGGCGGCACG--TGTGACTCGTGGACTTCCCT [13138]  
Mdo TTGTGAAATGTTTAGGACCACTTGATCTGGGTAGGCAT--TGTGACTCGTGGACTTCCCT [12193]  
Meu TTGTGAAATGTTTAGGACCACTCGATCAGGGCAGGCC--TGTGACTCGTGGACTTCCCT [10703]  
Oan TTGTGAAATGTTTAGGACCACTTGACCCGGCGAGGCC--TGTGACCCGTGGGCTTCCCT [11483]  
Aca TTGTGAAATGTTTAGGACCACTTGATCCGGCGGGCCCA--TGTGACCCGTGGACTTCCCT [13146]  
Pbi TTGTGAAATGTTTAGGACCACTTGATCCGGACGGCTTG--TGTGACCTGTGGACTTCCCT [13496]  
Cpi TTGTGAAATGTTTAGGACCACTTGACCAGGAAGGCCCG--TGTGACCCGTGGACTTCCCT [14118]  
Cmy TTGTGAAATGTTTAGGACCACTTGACCCGGGAGGCCCG--TGTGACCCGTGGACTTCCCT [13866]  
Psi TTGTGAAATGTTTAGGACCACTTGACCAGGGAGGCCCG--TGTGACCCGTGGACTTCCCT [12732]  
Asp TTGTGAAATGTTTAGGACCACTTGACCAGGGAGGCCCG--TGTGACCCGTGGACTTCCCT [12138]  
Ami TTGTGAAATGTTTAGGACCACTTGACCCGCGAGGCCCG--TGTGACCTGTGGACTTCCCT [13442]  
Asi -----TGTGACCCGTGGACTTCCCT [12702]  
Tgu TTGTGAAATGTTTAGGACCACTTGACCAGCGAGGCCCG--TGTGACCCGTGGACTTCCCT [10356]  
Cli TTGTGAAATGTTTAGGACCACTTGACCAGCGAGGCCCG--TGTGACCCGTGGACTTCCCT [12926]  
Gga TTGTGAAATGTTTAGGACCACTTGACCAGCGAGGCCCG--TGTGACCCGTGGACTTCCCT [11566]  
Xtr TTGTGAAATGTTTAGGACCACTTGATCCGGGTGACTCT--TGTGACCTGTGGGCTTCCCT [12275]  
Lch TTGTGAAATGTTTAGGACCACTTGATCAAGAAGGCCCT--TGTGGCCCGTGGGCTTCCCT [13726]  
Dre TTGTGAAATGTTTAGGACCACTTGACCAGAGTGACACT--TGTGACCTGTGGACTTCCCT [12611]

Hsa TTGTCATCCTATGCCTGAGAATATATGAAGGAGGCTGGGAAGGCAAAGGGACGTTCAATT [13366]  
Mmu TTGTCATCCTATGCCTGAGAATATATGAAGGAGGCTGGGAAGGCAAAGGGACGTTCAATT [13198]  
Mdo TTGTCATCCTATGCCTGAGAATATATGAAGGGGGCTGGGAAGGCAAAGGGACGTTCAATC [12253]  
Meu TTGTCATCCTATGCCTGAGAATATATGAAGGGGGCTGGGAAGGCAAAGGGACGTTCAATT [10763]  
Oan TTGTCATCCTATGCCTGAGAATATATGAAGGGGGCTGGGAAGGCAAAGGGACGTTCAACT [11543]  
Aca TTGTCATCCTATGCCTGAGAATATATGAAGGGGGCTGGGAAGGCAAAGGGACGTTCAATT [13206]  
Pbi TTGTCATCCTATGCCTGAGAATATATGAAGGGGGCTGGGAAGGCAAAGGGACGTTCAGTT [13556]  
Cpi TTGTCATCCTATGCCTGAGAATATATGAAGGGGGCTGGGAAGGCAAAGGGACGTTCAACT [14178]  
Cmy TTGTCATCCTATGCCTGAGAATATATGAAGGGGGCTGGGAAGGCAAAGGGACGTTCAACT [13926]  
Psi TTGTCATCCTATGCCTGAGAATATATGAAGGGGGCTGGGAAGGCAAAGGGACGTTCAATT [12792]  
Asp TTGTCATCCTATGCCTGAGAATATATGAAGGGGGCTGGGAAGGCAAAGGGACGTTCAATT [12198]  
Ami TTGTCATCCTATGCCTGAGAATATATGAAGGGGGCTGGGAAGGCAAAGGGACGTTCAATT [13502]  
Asi TTGTCATCCTATGCCTGAGAATATATGAAGGGGGCTGGGAAGGCAAAGGGACGTTCAATT [12762]  
Tgu TTGTCATCCTATGCCTGAGAATATATGAAGGGGGCTGGGGAGGCAAAGGGACGTTCAACT [10416]  
Cli TTGTCATCCTATGCCTGAGAATATATGAAGGGGGCTGGGAAGGCAAAGGGACGTTCAACT [12986]  
Gga TTGTCATCCTATGCCTGAGAATATATGAAGGGGGCTGGGAAGGCAAAGGGACGTTCAACT [11626]  
Xtr TTGTCATCCTATGCCTGAGAATATATGAAGGGGGCTGGGAAGGCAAAGGGACGTTCAGTT [12335]  
Lch TTGTCATCCTATGCCTGAGAATAAATGAAGGGGGCTGGGAAGGCAAAGGGATGTTCAACT [13786]  
Dre TTGTCATCCTATGCCTG-GAGTA-ATAGAGGGGGCTGGGAAGTCAAAGGGACGCTCAGGC [12669]

Hsa GTCATC--ATGTGACTTGTGGGCTTCCCTTTGTCATCCTTCGCCTAGGGCTCTGAGCAGG [13424]  
Mmu GTCATC--CTGTGACCTGTGGGCTTCCCTTTGTCATCCTTTGCCTAGGCCTCTGAGTGAG [13256]  
Mdo GTCATC--ATGTGACCTGTGGGCTTCCCTTTGTCATCCTATGCCTGGAAATCAGAGTGGG [12311]  
Meu GTCATC--ATGTGACCTGTGGGCTTCCCTTTGTCATCCTATGCCTGGAAATCAGAGTGGG [10821]  
Oan GTCATC--TTGTGACTGCTGAGCTTCCCTTTGTCATCCTATGCCTGGAAGTCAAAATGGG [11601]  
Aca GTCATC--ACATGACCTGTGGGCTTCCCTTTGTCATCCTATGCCTGGAGATCGCAGAGAG [13264]  
Pbi GTCATC--ACATGACCTGTGGGCTTCCCTTTGTCATCCTATGCCTGGAGCTCACAGTGAG [13614]  
Cpi GTCATC--ATGTGACCTGTGGGCTTCCCTTTGTCATCCTATGCCTGGAGTTCATAGTGAG [14236]  
Cmy GTCATC--ATGTGACCTGTGGGCTTCCCTTTGTCATCCTATGCCTGGAGATCATAGTGAG [13984]  
Psi GTCATC--ATGTGAC-TGTGGGCTTCCCTTTGTCATCCTATGCCTGGAGATCATAGTGAG [12849]  
Asp GTCATC----- [12204]  
Ami GTCATC--ATGTGACCTGTGGGCTTCCCTTTGTCATCCTATGCCTGGAGATCATAGTGAG [13560]  
Asi GTCATC--ATGTGACCTGTGGGCTTCCCTTTGTCATCCTATGCCTGGAGATCATAGTGAG [12820]  
Tgu GTCATC--ATGTGACCTGTGGGCTTCCCTTTGTCATCCTATGCCTGGAGATCACAGTGAG [10474]  
Cli GTCATC--ATGTGACCTGTGGGCTTCCCTTTGTCATCCTATGCCTGGAGATCACAGTGAG [13044]  
Gga GTCATC--GTGTGACCTGTGGGCTTCCCTTTGTCATCCTATGCCTGGAGATCACAGTGAG [11684]  
Xtr GTCATC--TTGTGACCCATGGGCTTCCCTTTGTCATCCTATGCCTGAGAATGCTGGAGAG [12393]  
Lch GTCATC--ATGTGACCTGTGGGTTTCCCTTTGTCATCCTATGCCTGGAGTTAGTAGCAAG [13844]  
Dre GTCATC--CGTGACCTCCTGGGTTTCCCTTTGTCATCCTATGCCTGCAGTTCCTGATGAG [12727]

Hsa GCAGGGACAGCAAAGGGGTGCTCAGTTGTCACT----- [13457]  
Mmu GCAAGGACAGCAAAGGGGGCTCAGTGGTCACT----- [13289]  
Mdo GCAGGGACAGCAAAGGGATGCTCAGCTGTCGTC----- [12344]  
Meu GCAGGGACAGCAAAGGGAGGCTCAGCTGTCGTC----- [10854]  
Oan GCAGGGACAGCAAAGGGATGATCAACCGTCACT----- [11634]  
Aca GCAGGGACAGCAAAGGGGTGCTCAGCTGTTGTC----- [13297]  
Pbi GCAGGGCCAGCAAAGGGTTGCTCAGCTGTTGTC--CTTGGCTCTGTAGCTTTCCCTTTGT [13672]  
Cpi GCAGGGACAGCAAAGGGATGCTCAGTTGTGTCGTC--GTGCGCCCTGTGAGCTTCCCTTTGT [14294]  
Cmy GCAGGGACAGCAAAGGGATGCTCAGCTGTCGTC--GTGCGCCCTGTGAGCTTCCCTTTGT [14042]  
Psi GCAGGGACAGCAAAGGGTTGCTCAGCTGTCATC--ATGCGCCCTGTGGGCTTCCCTTTGT [12907]  
Asp -----ATGCGCCCTGTGGGCTTCCCTTTGT [12229]  
Ami GCAGGGACAACAAAGGGATGCTCAATTGTCACT--CTGCGCTCTGTGAGCTTCCCTTTGT [13618]  
Asi GCAGGGACAACAAAGGGATGCTCAATTGTCACT--CTGCGCTCTGTGAGCTTCCCTTTGT [12878]  
Tgu GCAGGGACAGCAAAGGGATGCTCAGCTGTCGTC--CTGCCCCCTGTGAGCTTCCCTTTGT [10532]  
Cli GCAGGGACAGCAAAGGGATGCTCAGCTGTCGTC--CTGCCCCCTGTGAGCTTCCCTTTGT [13102]  
Gga GCAGGGACAGCAAAGGGATGCTCAGCTGTCGTC--CTCGCTCCTGTGAGCTTCCCTTTGT [11742]  
Xtr GCAGGGACAGCAAAGGGATGCTCAGATGTTACC----- [12426]  
Lch GCAGGGACAGCAAAGGGATGCTCAGCTGTCATC--CAGTGAAATGGGGGCTTCCCTTTCT [13902]  
Dre GCTGGGACAGCAAAGGGAGGTTTCAGATGTCGAC----- [12760]

Hsa ----- [13457]  
Mmu ----- [13289]  
Mdo ----- [12344]  
Meu ----- [10854]  
Oan ----- [11634]  
Aca ----- [13297]  
Pbi CATCCTATGCCTGAGAAATTCAGGGAGGCTGGGACGGTGAAGGGAAGCCACAGCGTTAT [13732]  
Cpi CATCCTATGCCTGAGAGATGCCTGGAGGCTGGGACGGTGAAGGGAAGCCACGTGGCTGC [14354]  
Cmy CATCCTATGCCTGAGAGATGCCTGGAGGCTGGGACGGTGAAGGGAAGCCACGTGGCTGC [14102]  
Psi CATCCTATGCCTGAGAGATGCCTGGAGGCTGGGACGGTGAAGGGAAGCCACGGGGCTGC [12967]  
Asp CATCCTATGCCTGAGAGATGCCTGGAGGCTGGGACGGTGAAGGGAAGCCACGTGGCTGC [12289]  
Ami CATCCTATGCCTGAGAGATGCCTGGAGGCTGGGACGGTGAAGGGAAGCCACGGGGCTGC [13678]  
Asi CATCCTATGCCTGAGAGATGCCTGGAGGCTGGGACGGTGAAGGGAAGCCACGGGGCTGC [12938]  
Tgu CATCCTATGCCTGAGCGATGCCTGGAGGCTGGGACGGCCAAGGGAGGCCCACGGG-CTGC [10591]  
Cli CATCCTATGCCTGAGCCATGGCCG-AGGCTGGGACGGTGAAGGGAGGCCCACGGG-CTGG [13160]  
Gga CATCCTATGCCTGAGCGATGCCTGGAGGCTGGGACGGTGAAGGGAGGCCCACGGG-CTGC [11801]  
Xtr ----- [12426]



```
Lch CATCCTATGCCTGAGAATTCACCTGAAGGCTGGGAAGGTAAAGGGAGGCTCACATCTCACC [13962]
Dre ----- [12760]

Hsa ---TTCTCTTGTCTTCATTCCACCGGAGTCTGTCTCATACCCAA-CCAGATTTTCAGTGG [13513]
Mmu ---TCCTCTTGTCTTCATTCCACCGGAGTCTGTCTTATGCC-AA-CCAGATTTTCAGTGG [13344]
Mdo ---TTCTCTTGTCTTCATTCCACCGGAGTCTGTCTCATATCTAA-TCAGATTTTCAGTGG [12400]
Meu ---TTCTCTTGTCTTCATTCCACCGGAGTCTGTCTCATATGTAA-TCAGATTTTCAGTGG [10910]
Oan ---TTCTGTTGTCTTCATTCCACCGGAGTCTGTTTCGTACCTAA-TCAGATTTTCAGTGG [11690]
Aca ---TTCTATTGTCTTCATTCCACCGGAGTCTGTCTCATATCTAA-TCAGATTTTCAGTGG [13353]
Pbi A--TTCTGTTGTCTTCATTCCACCGGAGTCTGTCTGAATACCTAA-TCAGATTTTCAGTGG [13789]
Cpi C--TTCTGTTGTCTTCATTCCACCGGAGTCTGTCTCATAACTAA-TCAGATTTTCAGTGG [14411]
Cmy C--TTCTGTTGTCTTCATTCCACCGGAGTCTGTCTCATACCTAA-TCAGATTTTCAGTGG [14159]
Psi C--TTCTATTGTCTTCATTCCACCGGAGTCTGTCTCATACCTAA-TCAGATTTTCAGTGG [13024]
Asp C--TTCTATTGTCTTCATTCCACCGGAGTCTGTCTCATACCTAA-TCAGATTTTCAGTGG [12346]
Ami C--TTCTGTTGTCTTCATTCCACCGGAGTCTGTCTCATACCTAA-TCAGATTTTCAGTGG [13735]
Asi C--TTCTGTTGTCTTCATTCCACCGGAGTCTGTCTCATACCTAA-TCAGATTTTCAGTGG [12995]
Tgu C--TTCTGTTGTCTTCATTCCACCGGAGTCTGTCTC-TAGCTAA-CCAGATTTTCAGTGG [10647]
Cli C--TTCTGTTGTCTTCATTCCACCGGAGTCTGTCTCATACCTAAACCAGATTTTCAGTGG [13218]
Gga C--TTCTGTTGTCTTCATTCCACCGGAGTCTGTCTCGTACCTAA-CCAGATTTTCAGTGG [11858]
Xtr ---TCCTGCTGTCTTCATTCCACCGGAGTCTGTCTCATACATAA-TCAGATTTTCAGTGG [12482]
Lch C--TTCTGTTGTCTTCATTCCACCGGAGTCTGTTTCATAACCAA-TCAGATTTTCAGTGG [14019]
Dre ---GCATTCTATCCTTCATTCCACCGGAGTCTGTGTAGTTGTTCAATCAGATTTTCAGTGG [12817]

Hsa AGTGAAGTTCAGGAGGCATGGAG----- [13536]
Mmu AGTGAAGCTCAGGAGGCATGGAG----- [13367]
Mdo AGTGAAGCATAAGAGGCATGGAG----- [12423]
Meu GGTGAAGCATAAGAGGCGTGGAG----- [10933]
Oan AGTGAAGCACAAGAGGCATGGAG----- [11713]
Aca AGTGAAGCACAAGAGACATGGAG--CTTGGGTGCCCTTCATTCCACCGGAATCTGTACCC [13411]
Pbi CGTGAAGTACATGAGACATGGAG--CTTGGGTGCCCTTCATTCCACCGGAATCTGTAAAA [13847]
Cpi AGTGAAGCACAAGAGACATGGAG--TGCTGGTGCCCTTCATTCCACCGGAATCTGTAGAG [14469]
Cmy AGTGAAGCACAAGAGACATGGAG--TGCTGGTGCCCTTCATTCCACCGGAATCTGTAGAG [14217]
Psi CGTGAAGCACAAGAGACATGGAG--TGCTGGTGCCCTTCATTCCACCGGAATCTGTAGAG [13082]
Asp CGTGAAGCACAAGAGACATGGAG--TGCTGGTGCCCTTCATTCCACCGGAATCTGTAGAG [12404]
Ami AGTGAAGCACAAGAGACATGGAG--TTCTGGTGCCCTTCATTCCACCGGAATCTGTAGGG [13793]
Asi AGTGAAGCACAAGAGACATGGAG--TTCTGGTGCCCTTCATTCCACCGGAATCTGTAGGG [13053]
Tgu AGTGAAGCACAAGAGGCATGGAG--TCCTGGTGCCCTTCATTCCACCGGAATCTGTGCAT [10705]
Cli AGTGAAGTACGAGAGACATGGAG--TCTTGGCACCCCTTCATTCCACCGGAATCTGTCTAT [13276]
Gga AGTGAAGCACAAGAGACATGGAG--TCCTGATGCCCTTCATTCCACCGGAATCTGTACAGT [11916]
Xtr AGTGAAGCACAAGAGGCATGTAG--TGCTGCTGTCTTCATTCCACCGGATCCTGTGTAA [12540]
Lch AGTGAAGTACAGGAGACATGGAG--TCCTGCTGTCTTCATCCCTCCGGATCCC-TGTGC [14076]
Dre TGTGAAGTGTAGGAAACACGGAA----- [12840]

Hsa -----TTCTGTGACGGG [13549]
Mmu -----TTCTTTGACGGG [13380]
Mdo -----TTCTGTGACAGG [12436]
Meu ----- [10933]
Oan -----TTCTGTGACAGA [11726]
Aca GCAAAAACCGGATTTTC-TGTGAAATGAAGCCCACCAGGCATGGAA--TTCTCTAACAAG [13468]
Pbi GCAGACACCAGATTTTC-TGTGAAATGAAGCCCACCTGGCATGGAA--TTCTCTAATGGA [13904]
Cpi GCAGAAACCAGATTTTC-AGTGTAATGAAGCCCATCAGACATGGAA--TTCTCTAACAGG [14526]
Cmy GCAGAAACCAGATTTTC-AGTGTAATGAAGCCCATCAGACATGGAA--TTCTCTAACAGG [14274]
Psi GCAGAAACCAGATTTTC-AGTGTAATGAAGCCCATCAGACATGGAA--GTCTCCAACGGG [13139]
Asp GCAGAAACCAGATTTTC-AGTGTAATGAAGCCCATCAGACATGGAA----- [12448]
Ami ATCAAAAACCAGATTTTC-AGTGAAATGAAGCCCCTCAGACGTGGAA--TTCTCCAACAGG [13850]
Asi ATCAAAAACCAGATTTTC-AGTGAAATGAAGCCCCTCAGACGTGGAA--TTCTCCAACAGG [13110]
Tgu GCAGAACCCGGATTTTC-AGTGAAATGAAGCCCCTCAGAAAGGCAG----- [10749]
```

---

---

|     |                                                                 |         |
|-----|-----------------------------------------------------------------|---------|
| Cli | ACAGAAACCAGATTTTC-AGTGAAATGAAGCCTGTCAGAGAGGCAG-----             | [13320] |
| Gga | GCAGAAACCAGATTTTC-AGTGAAATGAAGCCCATCAGAGAGGCAG-----             | [11960] |
| Xtr | ATATAATCCAGATTCCCAGTGGCATGAAGTGCATTAGCTGAGCCT--TCCTTTCAACAGG    | [12598] |
| Lch | ACTGAATCCAGATTCCCAGTGGGATGAAGTG---TAGCTGGTTGG--CTCTTGTAACATA    | [14131] |
| Dre | -----                                                           | [12840] |
|     |                                                                 |         |
| Hsa | CGAGCTTTTGGCCCGGGTTATACCTGATGCTCAC---GTATAAGACGAGCAAAAAGCTTG    | [13606] |
| Mmu | TGAGCTTTTGGCCCGGGTTATACCTGACACTCAC---GTATAAGACGAGCAAAAAGCTTG    | [13437] |
| Mdo | TGAGCTTTTGGTCCGGGTTATACCTGATGCATGT---GTATAAGACGAGCAAAAAGCTCG    | [12493] |
| Meu | -----                                                           | [10933] |
| Oan | CAAGCTTTTGGCCAGATTATACCTGCATTTCCC---GTATAAGACGAGCAAAAAGCTTG     | [11783] |
| Aca | GAAGCTTTTGGCTCGGGTTATATTTTGAAGTGGCAGTGTATAAGACGAGCAAAAAGCTTG    | [13528] |
| Pbi | GAAGCTTTTGGCTCGGGTTATATTTTGAAGTGGCAGTGTATAAGACGAGCAAAAAGCTTG    | [13964] |
| Cpi | GAAGCTTTTGGCTCGGGTTATATTTTTC-ACTCGCGCGTATAAGACGAGCAAAAAGCTTG    | [14585] |
| Cmy | GAAGCTTTTGGCTTGGGTTATATTTTTC-ATTCTCAGCATATAAGACGAGCAAAAAGCTTG   | [14333] |
| Psi | GAAGCTTTTGGCTCTGGTTATATTTTCC-ACTCGCAGCGTATAAGACGAGCGAAAAGCTTG   | [13198] |
| Asp | -----                                                           | [12448] |
| Ami | GAAGCTTTTGGCTTGGGTTATATTTGTC-ACTCGCAGTGTATAAGACGAGCGAAAAGCTTC   | [13909] |
| Asi | GAAGCTTTTGGCTTGGGTTATATTTGTC-ACTCGCAGTGTATAAGACGAGCGAAAAGCTTC   | [13169] |
| Tgu | -----                                                           | [10749] |
| Cli | -----                                                           | [13320] |
| Gga | -----                                                           | [11960] |
| Xtr | CAAGCTTTTGGCTTGGATTATGTTTTTC-TGTTGTT---GTATAAGACGAGCATAAAGCTTG  | [12655] |
| Lch | TAAGCTTTTGGCTTGGATTATGTTT-C-ATTTTAT-CATATAAGACGAGCAAAAATGCTTG   | [14188] |
| Dre | -----                                                           | [12840] |
|     |                                                                 |         |
| Hsa | TTGGTCAGAGG--TTCTCCTCTCAGGGAAGCTTTTTGCTCGAATTATGTTTCTGATCCGA    | [13664] |
| Mmu | TTGGTCAGAGG--TGCTCCTCTCAGGGAAGCTTTTTGCTCGCGTTATGTTTCTCATCCGA    | [13495] |
| Mdo | TTGGTCAGAGG--TTCTCCTCTCAGGGAAGCTTTTTGCTCGGGTTATGTTTGGATCTGA     | [12551] |
| Meu | -----TTCTCCTCTCAGGGAAGCTTTTTGCTCGCGTTATGTTTGGATTGGA             | [10980] |
| Oan | TTGGTCAGAGG-----                                                | [11794] |
| Aca | TTGGTTGGAGG-----                                                | [13539] |
| Pbi | TTGGTTGGAGG-----                                                | [13975] |
| Cpi | TTGGTTGGAGG-----                                                | [14596] |
| Cmy | TTGGTTGGAGG-----                                                | [14344] |
| Psi | TCGGTTGGCGG-----                                                | [13209] |
| Asp | -----                                                           | [12448] |
| Ami | TTGGTTGGAAG-----                                                | [13920] |
| Asi | TTGGTTGGAAG-----                                                | [13180] |
| Tgu | -----                                                           | [10749] |
| Cli | -----                                                           | [13320] |
| Gga | -----                                                           | [11960] |
| Xtr | TTTGTTAGAAG-----                                                | [12666] |
| Lch | TTTCGCTACAAG--TTCTCCTCACAGGGAGGCTTTTTGTTTCGCGTTATGTTTCGGTGTGA-A | [14245] |
| Dre | -----CTCTACTGACAGAGAAGCTTTTTGTTTGTGTTATGTTTATTTTCA-A            | [12886] |
|     |                                                                 |         |
| Hsa | ATATAAGACGAACAAAAGGTTTGTCTGAGGGCAGAG--CAGGCGCAGGGCAGCCCCTGCC    | [13722] |
| Mmu | ATATAAGACGAACAAAAGGTTTGTCTGAGGGCTGAG--CAGGCTCAGGACAGCCACTGCC    | [13553] |
| Mdo | ATATAAGACGAACAAAAGGTTTGTCTGTGTGCAGAG--CGGCCGACAGGGGAGCCACTGAC   | [12609] |
| Meu | ATATAAGACGAACAAAAGGTTTGTCTGTGTGCAGAG--CGGCAGCAGGGGAGCCACTGAC    | [11038] |
| Oan | -----                                                           | [11794] |
| Aca | -----CAGGAGCAGATGAGCCACTGAC                                     | [13561] |
| Pbi | -----CAGAAGCAGGTGAGCCACTGAC                                     | [13997] |
| Cpi | -----CAGAAGCTGGTGGAGCCACTGAC                                    | [14618] |
| Cmy | -----CAGAAGCTGGTGGAGCCACTGAC                                    | [14366] |
| Psi | -----CAGAAGCAGGTGAGCCACTGAC                                     | [13231] |
| Asp | -----CAGAAGCAGGTGAGCCACTGAC                                     | [12470] |

---

---

|     |                                                                |         |
|-----|----------------------------------------------------------------|---------|
| Ami | -----CAGAAGCAGGTGAGCCACTGAC                                    | [13942] |
| Asi | -----CAGAAGCAGGTGAGCCACTGAC                                    | [13202] |
| Tgu | -----                                                          | [10749] |
| Cli | -----CAGGAGCAGGTGAGCCACTGAC                                    | [13342] |
| Gga | -----CAGGAGCAGGTGAGCCACTGAC                                    | [11982] |
| Xtr | -----CAGATGCAGGTGAGCCACTGAC                                    | [12688] |
| Lch | ATATAAGACGAACAAAAAGTTTGTCTGTTTGTAGAT--CAGAAGCAGGTGAGCCACTGAC   | [14303] |
| Dre | ATGTAAGACGAACAAAAAGTTTTTCTGTTAGTAGGT--TGAAAGCAGGTAAGCCACTGAC   | [12944] |
|     |                                                                |         |
| Hsa | CACCGCACACTGCGCTGCC---CAGACCCACTGTGCGTGTGACAGCGGCTGATCTGTGC    | [13779] |
| Mmu | CACCGCACACTGCGTTGCTC---CGGACCCACTGTGCGTGTGACAGCGGCTGATCTGTCC   | [13610] |
| Mdo | TAACGCACATTGCGCTC-----AGGACCCACTGTGCGTGTGACAGCGGCTA-CCGTGCA    | [12662] |
| Meu | CAACGCACATTGCGCTG-----AGGACCCACTGTGCGTGTGACAGCGGCTA-CCGTGCA    | [11091] |
| Oan | -----                                                          | [11794] |
| Aca | TAACGCACATTGTGCTTCTC---GTGTCCCCACTGTGCGTGTGACAGCGGCTAACCTGCTT  | [13619] |
| Pbi | TAACGCACATTGTGCTGCTA---ATGTCCCCACTGTGCGTGTGACAGCGGCTAACCTGCTT  | [14055] |
| Cpi | TAACGCACATTGTGCTGTTA---AAGAATCCACTGTGCGTGTGACAGCGGCTAACCTGCTT  | [14676] |
| Cmy | TAACGCACATTGTGCTGTTA---AAGACTCCACTGTGCGTGTGACAGCGGCTAACCTGCTT  | [14424] |
| Psi | TAACGCACATTGTGCTGTTA---AAGACTCCACTGTGCGTGTGACAGCGGCTAACCTGCTT  | [13289] |
| Asp | TAACGCACATTGTGCTGTTA---AAGACTCCACTGTGCGTGTGACAGCGGCTAACCTGCTT  | [12528] |
| Ami | TAACGCACATTGTGCTGTTA---GCGATTCCACTGTGCGTGTGACAGCGGCTAACCTGNTT  | [14000] |
| Asi | TAACGCACATTGTGCTGTTA---GCGATTCCACTGTGCGTGTGACAGCGGCTAACCTGCTT  | [13260] |
| Tgu | -----                                                          | [10749] |
| Cli | TAACGCACATTGTGCTCTCG---GCGACTCCACTGTGCGTGTGACAGCGGCTAACCTGCTC  | [13400] |
| Gga | TAACGCACATTGTGCTCTCG---GCGACTCCACTGTGCGTGTGACAGCGGCTAACCTGCTC  | [12040] |
| Xtr | TAACGCACATTGCGCTGCTCCTAAAATGCCACTGTGCGTGTGACAGCGGCTAACCTGCTC   | [12748] |
| Lch | TAACGCACATTGTGCTGTCA---GTGATTCCACTGTGCGTGTGACAGCGGCTAACCTGCTT  | [14361] |
| Dre | TAACGCACATTGCGCCTATT-CTCCACTCCACTGTGCGTGTGACAGCGGCTAACCTGCTT   | [13003] |
|     |                                                                |         |
| Hsa | CTGGGCA--AGAGTTGTCATGTGTCTGCCTGTCTACACTTGCTGTGCAGAACATCCGCTC   | [13837] |
| Mmu | CTGGGCA--AGAGTTGTCATGTGTCTGCCTGTCTACACTTGCTGTGCAGAACATCCGCTC   | [13668] |
| Mdo | ACCGGCC--GGAGTTGTCATGTGTCTGCCTGTCTACACTTGCTGTGCAGAACATCCTCTC   | [12720] |
| Meu | GCCGGC-----                                                    | [11098] |
| Oan | -----GGAGTTGTCACGTGTCTGCCTGTCTACACTTGCTGTGCAGAACATCCTCTC       | [11845] |
| Aca | TTTCGGAC--AGAGTTGTCATGTGTCTGCCTGTCTACACTTGCTGTGCAGAACATCCTCTC  | [13677] |
| Pbi | CTAGGAC--AGAGTTGTCATGTGTCTGCCTGTCTACACTTGCTGTGCAGAACATCCTCTC   | [14113] |
| Cpi | TTTCGGAC--GGAGTTGTCATGTGTCTGCCTGTCTACACTTGCTGTGCAGAACATCCTCTC  | [14734] |
| Cmy | TTTCGGAC--GGAGTTGTCATGTGTCTGCCTGTCTACACTTGCTGTGCAGAACATCCTCTC  | [14482] |
| Psi | TTTCGGAC--GGAGTTGTCATGTGTCTGCCTGTCTACACTTGCTGTGCAGAACATCCTCTC  | [13347] |
| Asp | TTTCGGAC--GGAGTTGTCATGTGTCTGCCTGTCTACACTTGCTGTGCAGAACATCCTCTC  | [12586] |
| Ami | TTTCGGAC--GGAGTTGTCATGTGTCTGCCTGTCTACACTTGCTGTGCAGAACATCCACTC  | [14058] |
| Asi | TTTCGGAC--GGAGTTGTCATGTGTCTGCCTGTCTACACTTGCTGTGCAGAACATCCACTC  | [13318] |
| Tgu | -----GGAGTTGTCATGTGTCTGCCTGTCTACACTTGCTGTGCAGAACATCCTCTC       | [10800] |
| Cli | CTTCGGAC--GGAGTTGTCATGTGTCTGCCTGTCTACACTTGCTGTGCAGAACATCCTCTC  | [13458] |
| Gga | CTTCGGAC--GGAGTTGTCATGTGTCTGCCTGTCTACACTTGCTGTGCAGAACATCCTCTC  | [12098] |
| Xtr | CTAGGAA--GGAGTTGTCATGTGTCTGCCTGTCTACACTTGCTGTGCAGAACATCCTCTC   | [12806] |
| Lch | TTAGGAC--GGAGTTGTCATGTGTCTGCCTGTCTACACTTGCTGTGCAGAACATCCTCTC   | [14419] |
| Dre | TTGGATC--AGCGTTGTC---TGCTGCCTGTCTACACTTGCTGTGCAGAACTTCC-TGC    | [13057] |
|     |                                                                |         |
| Hsa | ACCTGTACAGCAGGCACAGACAGGCAGTCACATGACAACCC--GGCTGTGAGTTGGCTTTA  | [13895] |
| Mmu | ACCTGTACAGCAGGCACAGACAGGCAGTCACATGACAACCC--GGCTATGAGTTGGTTTA   | [13726] |
| Mdo | ACCTGTACAGCAGGCACAGACAGGCAGTCACATGACAACCC--GGCTGTGAATTTGGCTTTA | [12778] |
| Meu | -----GGCTGTGAATTTGGCTTTA                                       | [11115] |
| Oan | ACCTGTACAGCAGGCACAGACAGGCAGTCACATGACAACCC--GGCTGTGAATCGGCTTTA  | [11903] |
| Aca | ACCTGTACAGCAGGCACAGACAGGCAGTCACATGACAACCC--GGCTGTGAATTTGGTTTA  | [13735] |
| Pbi | ACCTGTACAGCAGGCACAGACAGGCAGTCACATGACAATCC--GGCTGTGAATTTGGTTTA  | [14171] |
| Cpi | ACCTGTACAGCAGGCACAGACAGGCAGTCACATGACAACCC--GGCTGTGAATTTGGCTTTA | [14792] |

Cmy ACCTGTACAGCAGGCACAGACAGGCAGTCACATGACAACCC--GGCTGTGAATTGACTTGA [14540]  
Psi ACCTGTACAGCAGGCACAGACAGGCAGTCACATGACAACCC--GGCTGTGAATTGGCTTGA [13405]  
Asp ACCTGTACAGCAGGCACAGACAGGCAGTCACATGACAACCC--GGCTGTGAATTGGCTTGA [12644]  
Ami ACCTGTACAGCAGGCACAGACAGGCAGTCACATGACAACCC--GGCTGTGAATTGGCATA [14116]  
Asi ACCTGTACAGCAGGCACAGACAGGCAGTCACATGACAACCC--GGCTGTGAACTGGCATA [13376]  
Tgu ACCTGTACAGCAGGCACAGACAGGCAGTCGCATGACAACCC--GGCTGTGAGTTGGCTTGA [10858]  
Cli ACCTGTACAGCAGGCACAGACAGGCAGTCGCATGACAACCC--GGCTGTGAATTGGCTTGA [13516]  
Gga ACCTGTACAGCAGGCACAGACAGGCAGTCACATGACAACCC--GGCTGTGAATTGGCTTGA [12156]  
Xtr ACCTGTACAGCAGGCACAGACAGGCAGTCACATGACAACCC--GGCTGTGAATTGGCTTGA [12864]  
Lch ACCTGTACAGCAGGCACAGACAGGCAGTCACATGACAACCC--GGCTGTGACTTGGCTTGA [14477]  
Dre ACCTGTACAGCAGGCACAGACAGGCAGATGGCAGCCC--AGCTGATTTTTGGCATA [13115]

Hsa ATCTCAGCTGGCAACTGTGAGATGTTTCATACAATC-CCTCACAGTGGTCTCTGGGATTAT [13954]  
Mmu ATCTCAGCTGGCAACTGTGAGATGTCCCTATCATT-CCTCACAGTGGTCTCTGGGATTAT [13785]  
Mdo ATCTCAGCTGGCAACTGTGAGATGTTAATAAATTC-CCTCACAGTGGTCTCTGGGATTAT [12837]  
Meu ATCTCAGCTGGCAACTGTGAGATATTAATAAATTC-CCTCACAGTGGTCTCTGGGATTAT [11174]  
Oan ATCTCAGCTGGCAACTGTGAGATGCTAACCAATTC-TCCACAGTGGCATCTGGGATTAT [11962]  
Aca ATCTCAGCTGGCAACTGTGAGCAGTTTCCAAATCC-TCTCACAGTGGTTTCTGGGATTAT [13794]  
Pbi ATCTCAGCTGGCAACTGTGAGCAGTTAATAAATTC-TCTCACAGTGGTATCTGGGATTAT [14230]  
Cpi ATCTCAGCTGGCAACTGTGAGCAATTAATACATTC-TCTCACAGTGGTATCTGGGATTAT [14851]  
Cmy ATCTCAGCTGGCAACTGTGAGCAATTTATAAATTC-TCTCACAGTGGTATCTGGGATTAT [14599]  
Psi ATCTCAGCTGGCAACTGTGAGCAATTAATAAATTC-TCTCACAGTGGTATCTGGGATTAT [13464]  
Asp ATCTCAGCTGGCAACTGTGAGCAATTAATAAATTC-TCTCACAGTGGTATCTGGGATTAT [12703]  
Ami ATCTCAGCTGGCAACTGTGAGCAGTTTCATAAATTC-TCTCACAGTTGTATCTGGGATTAT [14175]  
Asi ATCTCAGCTGGCAACTGTGAGCAGTTTCATAAATTC-TCTCACAGTTGTATCTGGGATTAT [13435]  
Tgu ATCTCAGCTGGCAACTGTGAGCAGTTAATAA-CCTCACAGTGGTATCTGGGATTAT [10916]  
Cli ATCTCAGCTGGCAACTGTGAGCCGCTAATAA-CCTCACAGTGGTATCTGGGATTAT [13574]  
Gga ATCTCAGCTGGCAACTGTGAGCAGTTAATAA--T--TCTCACAGTGGTATCTGGGATTAT [12212]  
Xtr ATCTCAGCTGGCAACTGTGAGCAGTTAATAAATTA-TCTCACAGTGGTCTCTGGGATTAT [12923]  
Lch ATCTCAGCTGGCAACTGTGAGCAGCTAATAACTTC-TCCACAGTGGTCTCTGGGATTAT [14536]  
Dre ATCTCAGCTGGCAACTGTGAGTAGTGTTCATCCCTCTCACAGGCGCTGCTGGGGTTCT [13175]

Hsa GCTAAACAGAGCAA--TGGCAGACTGGAAAATCTCTGCAGGCAAATGTGATGTCACTGAG [14012]  
Mmu GCTAAACAGAGCAA--TGGCAGACTGGAAAATCTCTGCAGGCAAATGTGATGTCACTGAA [13843]  
Mdo GCTAAACAGAGCAA--TTGCAGACTGGAAAATCTCTGCAGGCAAATGTGGTGTGCTATA [12895]  
Meu GCTAAACAGAGCAA--TTACAGACTGGAAAATCTCTGCAGGCATATGTGGTGTGCTACA [11232]  
Oan GCTAAACACAGCAA--TCGCAGACTGGAAAATCTCTGCTGGCAAATGTGGTGTGCTACA [12020]  
Aca GCTAAACACAGCAA--TCACAGACTGAGAAAATCTCTGCAGGCAAATGTGATGTCTTGACC [13852]  
Pbi GCTAAACGACAGCAA--TCACAGACTGAGAAAATCTCTGCAGGCAAATGTGATGTGATGAT [14288]  
Cpi GCTAAACACAGCAA--TCATAGACTGGAAAATCTCTGCAGGCAAATGTGATGTATTTATA [14909]  
Cmy GCTAAACACAGCAA--TCATAGACTGGAAAATCTCTGCAGGCAAATGTGATGTACTAATA [14657]  
Psi GCTAAACACAGCAA--TCATAGACTGGAAAATCTCTGCAGGCAAATGTGATGTATTTATA [13522]  
Asp GCTAAACACAGCAA--TCATAGACTGGAAAATCTCTGCAGGCAAATGTGATGTATTTATA [12761]  
Ami GCTAAACATAGCAA--TCGCAGACTGGAAAATCTCTACAGGCAAATGTGATGTCTTTATA [14233]  
Asi GCTAAACATAGCAA--TCGCAGACTGGAAAATCTCTACAGGCAAATGTGATGTCTTTATA [13493]  
Tgu GCTAAACACAGCAA--TCACAGACTGGAAAATCTCTGCAGGCAAAGTGTGATGTCTTTATA [10974]  
Cli GCTAAACACAGCGA--TCGCAGACTGGAAAATCTCTGCAGGCAAATGTGATGTCTTTATA [13632]  
Gga GCTAAACACAGCAA--TCACAGACTGGAAAATCTCTGCAGGCAAATGTGATGTCTTTATA [12270]  
Xtr ACTAAACACAGCAA----- [12937]  
Lch GCTAAACACTGCAA--CAGCAGACTGTCTAATCTCTGCAGGCAAATGTGACGTTCTTTT [14594]  
Dre GTCACACACAGCAC--AAACTGACTGGGTAATCTCTGCAGGCAAATGTGATGTGATTA-- [13231]

Hsa --GAAATCACACACTTACCCGTAGAGATTTCTACAGTCTGACATC--TTGATGTGCGAGAT [14068]  
Mmu --GAAACCACACACTTACCTGTAGAGATTTCTTACAGTCTGACAAC--TTGATGTTGCGAGAT [13899]  
Mdo --GTTATCACACAATTACCCGTAGAGATTTCTGCAATCTGACATC--TTGATGTGCGTAGAT [12951]  
Meu --GTTATCACACAATTACCTGTAGAGATTTCTGCAATCTGACATC--TTGATGTGCGTAGAT [11288]  
Oan --GCAATCGCACAATTACCTGTAGAGATTTCTGCAATCTGGCTTT----- [12062]

Aca -AGCAATCTCACAGTTACCAGCAGAGGTTCTGCAATCTGGACTG--TTGATGTCGCAGAT [13909]  
Pbi --GCAATCTCACAGTTACCAGTAGAGGTTCTGCAATCTGGAGGG--TTGATGTCGCAGAT [14344]  
Cpi --GCAATCTCACAAATTACCTGTAGAGTTTCTGCAATCTGATCTC--TTGATGTCGCAGAT [14965]  
Cmy --GCAATCTCACAAATTACCTGTAGAGTTTCTGCAATCTGGCATC--TTGATGTTGCAGAT [14713]  
Psi --GCAATCTCACAAATTACCTGTAGAGTTTCTGCAATCTGGCATC--TTGATGTCGCAGAT [13578]  
Asp --GCAATCTCACAAATTACCTGTAGAGTTTCTGCAATCTGGCATC--TTGATGTCGCAGAT [12817]  
Ami --GTAATCTCACAAATTACCTATAGAGATTCTTCAATCTGGCATC--TTGATGTCGCAGAT [14289]  
Asi --GTAATCTCACAAATTACCTATAGAGATTCTTCAATCTGGCATC--TTGATGTCGCAGAT [13549]  
Tgu --GCAATCTCACAAATTACCTGTAGAGATTCTACAATCTGGCATC--TTGATGTCGCAGAT [11030]  
Cli --GCAATCTCACAAATTACCTGTAGAGATTCTACAATCTGGCACC--TTGATGTCGCAGAT [13688]  
Gga --GCAATCTCACAAATTACCTGTAGAGATTCTACAATCTGGCATC--TTGATGTCGCAGAT [12326]  
Xtr -----TTGATGTTGTAGAT [12951]  
Lch CAATAATCTCCCAGTCACTGTAGAGGTTCTGTAGTCTGTCTTC--GTGATGTCGCAGAT [14652]  
Dre ---CAGTCTCACATTGACCTGAAGAGGTTGAGCAGTCTGTTTAC--CTGATGTTGGTGAT [13286]

Hsa ACTGCATCAGGAAGTATTGGATAAGAATCAGTCACCATCAGTTCCTAATGCATTGCCTTT [14128]  
Mmu ACTGCATCAGGAAGTACTGGATAAGACTTAATCCCCATCAGTTCCTAATGCATTGCCTTT [13959]  
Mdo ACTGCATCAGGAAGTATTGGATAAATAATTCAGGCACCATCAGTTCCTAATGCATTGCCTTT [13011]  
Meu ACTGCATCAGGAAGTATTGGATAAATAATTCAGGCACCATCAGTTCCTAATGCATTGCCTTT [11348]  
Oan ----- [12062]  
Aca ACTGCATCAGGAAGTATTGGGGAATAATCATGTACCATCAGTTCCTAATGCATTGCCTTT [13969]  
Pbi ACTGCATCAGGAAGTATTGGATAAATAATCAGGCACCATCAGTTCCTAATGCATTGCCTTT [14404]  
Cpi ACTGCATCAGGAAGTATTGGATAAATAATCAGCCACCATCAGTTCCTAATGCATTGCCTTT [15025]  
Cmy ACTGCATCAGGAAGTATTGGATAAATAATCAGCCACCATCAGTTCCTAATGCATTGCCTTT [14773]  
Psi ACTGCATCAGGAAGTATTGGATAAATAATCAGCCACCATCAGTTCCTAATGCATTGCCTTT [13638]  
Asp ACTGCATCAGGAAGTATTGGATAAATAATCAGCCACCATCAGTTCCTAATGCATTGCCTTT [12877]  
Ami ACTGCATCAGGAAGTATTGGATAAATAATCAGTCACCATCAGTTCCTAATGCATTGCCTTT [14349]  
Asi ACTGCATCAGGAAGTATTGGATAAATAATCAGTCACCATCAGTTCCTAATGCATTGCCTTT [13609]  
Tgu ACTGCATCAGGAAGTATTGGATAAATAATCACTCACCATCAGTTCCTAATGCATTGCCTTT [11090]  
Cli ACTGCATCAGGAAGTATTGGATAAATAATCAGTCACCATCAGTTCCTAATGCATTGCCTTT [13748]  
Gga ACTGCATCAGGAAGTATTGGATAAATAATCAGTCACCATCAGTTCCTAATGCATTGCCTTT [12386]  
Xtr ACTGCATCAGGAAGTATTGGATCCCAGGGAGCAGCCATCAGTTCCTAATGCATTGCCTTT [13011]  
Lch ACTGCATCAGGAAGTATTGGATAACAACCTAACTACCATCAGTTCCTAATGCATTGCCTTT [14712]  
Dre ACTGCATCAGGAAGTATTGGATGATATTTCAGGAGCCATCAGTTCCTGATGCATTCCCAT [13346]

Hsa CAGCATCTA--GCGAGATTTTCTGTTGTGCTTGATCTAACCATGTGGTTGCGAGGTATGA [14186]  
Mmu CAGCATCTA--GCGAGATTTTCTGTTGTGCTTGATCTAACCATGTGCTTGCAGAGGTATGA [14017]  
Mdo CAGCATCTA--GCGAGATTTTCTGTTGTGCTTGATCTAACCATGTGGTTGTGAGGTATGA [13069]  
Meu CAGCATCTA--GCGAGATTTTCTGTTGTGCTTGATCTAACCATGTGGTTGTGAGGTATGA [11406]  
Oan -----GCGAGATTTTCTGTTGTGCTTGATCTAACCATGTGGTTGCAAGGTATGA [12111]  
Aca CAGCATCTA--GCGAGATTTTCTGTTGTGCTTGATCTAACCATGTGGTTGCGAGGTATGA [14027]  
Pbi CAGCATCTA--GCGAGATTTTCTGTTGTGCTTGATCTAACCATGTGGTTGTGAGGTATGC [14462]  
Cpi CAGCATCTA--GCGAGATTTTCTGTTGTGCTTGATCTAACCATGTGGTTGCAAGGTATGA [15083]  
Cmy CAGCATCTA--GCGAGATTTTCTGTTGTGCTTGATCTAACCATGTGGTTGCAAGGTATGA [14831]  
Psi CAGCATCTA--GCGAGATTTTCTGTTGTGCTTGATCTAACCATGTGGTTGCAAGGTATGA [13696]  
Asp CAGCATCTA--GCGAGATTTTCTGTTGTGCTTGATCTAACCATGTGGTTGCAAGGTATGA [12935]  
Ami CAGCATCTA--GCGAGATTTTCTGTTGTGCTTGATCTAACCATGTGGTTGTGAGGTATGA [14407]  
Asi CAGCATCTA--GCGAGATTTTCTGTTGTGCTTGATCTAACCATGTGGTTGTGAGGTATGA [13667]  
Tgu CAGCATCTA--GCGAGATTTTCTGTTGTGCTTGATCTAACCATGTGGTTGTGAGGTATGA [11148]  
Cli CAGCATCTA--GCGAGATTTTCTGTTGTGCTTGATCTAACCATGTGGTTGTGAGGTATGA [13806]  
Gga CAGCATCTA--GCGAGATTTTCTGTTGTGCTTGATCTAACCATGTGGTTGTGAGGTATGA [12444]  
Xtr CGGCATCTA--GCGAGATTTTCTGTTGTGCTTGATCTAACCATGTGGTTGTGAGGTATGA [13069]  
Lch CAGCATCTA--GCGGGATTTTCTTTGTGCTTGATCTAACCATGTGGTTGCGAGGTATGA [14770]  
Dre CAGCATCGA--GCGGGGTTTCTTTGTGCTTGATCTAACCATGTGGTTGCAGACTCAGA [13404]

Hsa GTA AAAACATGGTTCCGTC AAGCACCATGGAACGTCACGCAGCT--GCGGGGCTTTCCCTTT [14244]  
Mmu GAAAAACATGGTTCCGTC AAGCACCATGGAACGTCACGCAGCT--GCGGGGCTTTCCCTTT [14075]

---

Mdo GTAAAACATGGTTCTGTCAAGCACCATGGAACGTCACGCAGCT--ACGGGGCTTTTCCTTT [13127]  
Meu GTAAAACATGGTTCTGTCAAGCACCATGGAACGTCACGCAGCT----- [11449]  
Oan GTAAAACATGGTTCTGTCAAGCACCATGGAAGTCACGCAGCT--ATGGGGCTTTTCCTTT [12169]  
Aca GTAAAACATGGTTCTGTCAAGCACCATGGAACGTCACGCAGCT--ATGGGATTTTCCTTT [14085]  
Pbi GTAAAACATGGTTCTGTCAAGCACCATGGAACGTCACGCAGCT--ATGGGATTTTCCTTT [14520]  
Cpi GTAAAACATGGTTCTGTCAAGCACCATGGAACGTCACGCAGCT--ATGGGGTTTTTCCTTT [15141]  
Cmy GTAAAACATGGTTCTGTCAAGCACCATGGAACGTCACGCAGCT--ATGGGGTTTTTCCTTT [14889]  
Psi GTAAAACATGGTTCTGTCAAGCACCATGGAACGTCACGCAGCT--ATGAGGTTTTTCCTTT [13754]  
Asp GTAAAACATGGTTCTGTCAAGCACCATGGAACGTCACGCAGCT--ATGAGGTTTTTCCTTT [12993]  
Ami GTAAAACATGGTTCTGTCAAGCACCATGGAACGTCACGCAGCT--ATGGGGTTTTTCCTTT [14465]  
Asi GTAAAACATGGTTCTGTCAAGCACCATGGAACGTCACGCAGCT--ATGGGGTTTTTCCTTT [13725]  
Tgu GTAAAACATGGTTCTGTCAAGCACCATGGAACGTCACGCAGCT--ATGGGGTTTTTCCTTT [11206]  
Cli GTAAAACATGGTTCTGTCAAGCACCATGGAACGTCACGCAGCT--GTGGGGTTTTTCCTTT [13864]  
Gga GTAAAACATGGTTCTGTCAAGCACCATGGAACGTCACGCAGCT--ATGGGGTTTTTCCTTT [12502]  
Xtr GTAAAACATGGTTCTGTCAAGCACCATGGAACGTCACGCAGCT--ATGGGGTTTTTCCTTT [13127]  
Lch GTAAAACATGGTTCTGTCAAGCACCATGGAACGTCACGCAGCT--CTGGGGTTTTTCCTTT [14828]  
Dre CTAATACATGGTTCTGTCAAGCACCATGGAAGGCTTGCAGCA--GCGGGTTTTTCCTTT [13462]

Hsa GTGCTTGATCTAACCATGTGGTGAACGATGGAACCGGAACATGGTTCTGTCAAGCACCG [14304]  
Mmu GTGCTTGATCTAACCATGTGGTGAACGATGGAACCGGAACATGGTTCTGTCAAGCACCG [14135]  
Mdo GTGCTTGATCTAACCATGTGGTGAACGATAGAAACAGAACATGGTTCTGTCAAGCACCG [13187]  
Meu ----- [11449]  
Oan GTGCTTGATCTAACCATGTGGTGAACAATATAAACAGAACATGGTTCTGTCAAGCACCA [12229]  
Aca GTGCTTGATCTAACCATGTGGTGAACAATACAAATTTGAACATGGTTCTGTCAAGCACCA [14145]  
Pbi GTGCTTGATCTAACCATGTGGTGAACAATACAAATTTGAACATGGTTCTGTCAAGCACCA [14580]  
Cpi GTGCTTGATCTAACCATGTGGTGAACAATACAAATTTGAACATGGTTCTGTCAAGCACCA [15201]  
Cmy GTGCTTGATCTAACCATGTGGTGAACAATACAAATTTGAACATGGTTCTGTCAAGCACCA [14949]  
Psi GTGCTTGATCTAACCATGTGGTGAACAATACAAATTTGAACATGGTTCTGTCAAGCACCA [13814]  
Asp GTGCTTGATCTAACCATGTGGTGAACAATACAAATTTGAACATGGTTCTGTCAAGCACCA [13053]  
Ami GTGCTTGATCTAACCATGTGGTGAACAATACAAATTTGAACATGGTTCTGTCAAGCACCA [14525]  
Asi GTGCTTGATCTAACCATGTGGTGAACAATACAAATTTGAACATGGTTCTGTCAAGCACCA [13785]  
Tgu GTGCTTGATCTAACCATGTGGTGAACAATACAAATTTGAACATGGTTCTGTCAAGCACCA [11266]  
Cli GTGCTTGATCTAACCATGTGGTGAACAATACAAATTTGAACATGGTTCTGTCAAGCACCA [13924]  
Gga GTGCTTGATCTAACCATGTGGTGAACAATACAAATTTGAACATGGTTCTGTCAAGCACCA [12562]  
Xtr GTGCTTGATCTAACCATGTGGTGAACAATACATATTTGAACATGGTTCTGTCAAGCACCA [13187]  
Lch GTGCTTGATCTAACCATGTGGTGAACAATACAAATTTGAACATGGTTCTGTCAAGCACCA [14888]  
Dre GTGCTTGATCTAACCATGTGGTGCAGACTCAGACTAATACATGGTTCTGTCAAGCACCA [13522]

Hsa CGGAAAGCACCGTGCTC--CGGGCCGCGGCTCCTGATTGTCCAAACGCAATTTCTCGAGTC [14362]  
Mmu CGGAAAGCATCGCTCTC--CGGGCCGCGGCTCCTGATTGTCCAAACGCAATTTCTCGAGTC [14193]  
Mdo CGGAAAGCTCCGTGCTT--CGGGCCGCGGCTCCTGATTGTCCAAACGCAATTTCTCGTGGC [13245]  
Meu -----CGGGCCGCTGGCTCCTTATTGTCCAAACGCAATTTCTCGTGGC [11490]  
Oan CGGAAGGCTCCGTGTTT----- [12246]  
Aca TGGAAGGCTCCATGCTT--TGACCGCTGGGTCTGATTGTCCAAACGCAATTTCTTGTCTC [14203]  
Pbi TGGAAGGCTCCATGCTT--GGAGCCCTGGCCTGTGATTGTCCAAACGCAATTTCTTGTCTC [14638]  
Cpi TGGAAGGCTGCATACTT--TGAACACCGGCTCCTGATTGTCCAAACGCAATTTCTTGTGTC [15259]  
Cmy TGGAAGGCTGCATACTT--TGAATGCCGGCTCCTGATTGTCCAAACGCAATTTCTTGTGTC [15007]  
Psi TGGAAGGCTGCATACTT----- [13831]  
Asp TGGAAGGCTGCATACTT----- [13070]  
Ami TGGAAGGCTGCATACTT--TGAGCGCCGGGTCTGATTGTCCAAACGCAATTTCTTGTGTC [14583]  
Asi TGGAAGGCTGCATACTT--TGAGCGCTGGGTCTGATTGTCCAAACGCAATTTCTTGTGTC [13843]  
Tgu TGGAAGGCTGCATACTC----- [11283]  
Cli TGGAAGGCTGCATACTC----- [13941]  
Gga TGGAAGGCTGCATACTC----- [12579]  
Xtr TGGAAGGCCACATACTT----- [13204]  
Lch TGGAAGGCCACGACTT--GGAATTTTAGCTCCTGATTGTCCAAACGCAATTTCTTGTGTC [14946]  
Dre TGGAAGGCTTGCAGCA--TGACGGTCAGGTGCTGATTGTCCAAACGCAATTTCTTGTGCT [13580]

Hsa T---ATGGCTCCGGCC---GAGAGTTGAGTCTGGACGTCCCGAGCCGCCGC--AGGGGCT [14414]  
Mmu T---CTGGCTCCGGCC---GAGAGTTGCGTCTGGACGTCCCGAGCCGCCGC--AGGGGCT [14245]  
Mdo T-----CCGGCCCTCGAGAGTTGGGTCTGGACATCCCGAGCCGCCGC--AGGGGTT [13294]  
Meu T-----CCGGCCCTCGAGAGTTGGGTCTGGACATCCCGAGCCGCCGC--AGGGGTT [11539]  
Oan -----CGGGGCC [12253]  
Aca C-----GCTCCA-CC---GAGAGTTGAGTCTGGACATCAGGAGCCGGAGG--GGAACCT [14251]  
Pbi T-----CCA-CC---GAGAGTTGAGTCTGGACATCATGAGCCGGGGT--GGAACCT [14683]  
Cpi T-----GCGCCC---AAGAATTGAGTGTGGACGTTCGTGAGCCGGGGT--GGAATCT [15305]  
Cmy T-----GCGCCC---AAGAATTGAGTGTGGACGTTCGTGAGCCGGGGT--GGAATCT [15053]  
Psi -----GGAATCT [13838]  
Asp -----GGAATCT [13077]  
Ami T-----GC-CCC---AAGAATTGAGTGTGGACGTTCGGGAGCCGCCGT--GGAGTCT [14628]  
Asi T-----GC-CCC---AAGAATTGAGTGTGGACGTTCGGGAGCCGCCGT--GGAGTCT [13888]  
Tgu -----GGAATCT [11290]  
Cli -----GGAATCT [13948]  
Gga -----GGAATCT [12586]  
Xtr -----GGAGCTC [13211]  
Lch TTCTCAGATCCAAACC---AAGAATTGTGTCTGGACATCCTGAGCTGGAAT--GAAATTT [15001]  
Dre TGTGTGAAAC-----AGGAGTTGTGGATGGACATCACGCTCCTGTCT--AGGGTCC [13629]

Hsa TCGCCACTGATTGTCCAAACGCAATTCTTGTACGA--GTCTGCGGCCAACCGAGAATTGT [14472]  
Mmu TCGCCACTGATTGTCCAAACGCAATTCTTGTACGA--GTCTGCGGCCAACCGAGAATTGT [14303]  
Mdo CCGCCGCTGATTGTCCAAACGCAATTCTTGTGCGA--GTCTGCAGCCAACCGAGAATTGT [13352]  
Meu CCGCCGCTGATTGTCCAAACGCAATTCTTGTGCGA--GTCTGCAGCCAACCGAGAATTGT [11597]  
Oan CCGCCGCTGATTGTCCAAACGCAATTCTTGTGCGA--GTTTTCGGGCCAACCGAGAATTGT [12311]  
Aca TTGCTCCTGATTGTCCAAACGCAATTCTTGTCCAG--AAAACATGCAAACCAAGAATTGT [14309]  
Pbi TTGCTCCTGATTGTCCAAACGCAATTCTTGTGCGA--AAAAACATGCCAACCAAGAATTGT [14742]  
Cpi CTGCTCCTGATTGTCCAAACGCAATTCTTGTGCAATGGAATCATACAAACCAAGAATTGT [15365]  
Cmy CTGCTCCTGATTGTCCAAACGCAATTCTTGTGCAATGGAACATACAAACCAAGAATTGT [15113]  
Psi CTGCTCCTGATTGTCCAAACGCAATTCTTGTGCAATGGAACATACAAACCAAGAATTGT [13898]  
Asp CTGCTCCTGATTGTCCAAACGCAATTCTTGTGCAATGGAACATACAAACCAAGAATTGT [13137]  
Ami CCGCTCCTGATTGTCCAAACGCAATTCTTGTGCGGTGGAACGTACAAACCAAGAATTGT [14688]  
Asi CCGCTCCTGATTGTCCAAACGCAATTCTTGTGCGGTGGAACGTACAAACCAAGAATTGT [13948]  
Tgu CCGCTCCTGATTGTCCAAACGCAATTCTTGTGCGATGGAGCCGTACGAACCAAGAATTGT [11350]  
Cli CCGCTCCTGATTGTCCAAACGCAATTCTTGTGCGATGGAGCCGTACGAACCAAGAATTGT [14008]  
Gga CTGCTCCTGATTGTCCAAACGCAATTCTTGTGCGCTGGAGCCGTACGAACCAAGAATTGT [12646]  
Xtr TCGCCCTTGATTGTCCAAACGCAATTCTTGTTCGAATAGAAATATCAAGCCAAGAATTGT [13271]  
Lch TAGCTTCTGATTGTCCAAACGCAATTCTTGTGAAATCAAAAATAAATA-TCAAGAATTGT [15060]  
Dre CAGAGATTGATTGTCCAAACGCAATTCTTGTGAACATATAAATAAAT--CCAAGAATTGT [13687]

Hsa GGCTGGACATCTGTGGCTGAGCT--TCTGGGGCATGAACCTGGCATAACAATGTAGATTTTC [14530]  
Mmu GGCTGGACATCTGTGGTTGAGCT--TCTGGGGCATGAACCTGGCATAACAATGTAGATTTTC [14361]  
Mdo GGCTGGACATCTGTGGCTGAGCT--TTTGGGGCATGAACCTGGCATAACAATGTAGAATTC [13410]  
Meu GGCTGGACATCTGTGGCTGAGCT--TTTGGGGCATGAACCTGGCATAACAATGTAGAATTC [11655]  
Oan GACTGGACATCTGTGGCTGGGCT--TTTGGAGCATGAACCTGGCATAACAATGTAGAATTC [12369]  
Aca GTCTGGACATCTGTGGCCAAGTC--CTTGGGGCCTGAACCTGGCATAACAATGTAGAATTC [14367]  
Pbi GTCTGGACATCGGTGGCTAAGCC--CTTGGGGCCTTGACCTGGCATAACAATGTAGAATAC [14800]  
Cpi GTCTGGACATCTGTGGCAGAGAT--TTTGGGGCATGAACCTGGCATAACAATGTAGAATTC [15423]  
Cmy GTCTGGACATCTGTGGCAGAGAT--TTTGGGGCATGAACCTGGCATAACAATGTAGAATTC [15171]  
Psi GTCTGGACATCTGTGGCAGAGAT--TTTGGGGCATGAACCTGGCATAACAATGTAGAATTC [13956]  
Asp GTCTGGACATCTGTGGCAGAGAT--TTTGGGGCATGAACCTGGCATAACAATGTAGAATTC [13195]  
Ami GTCTGGACATCTGTGGCGGGGAG--TTTGGGGCATGAACCTGGCATAACAATGTAGATTTTC [14746]  
Asi GTCTGGACATCTGTGGCGGGGAG--TTTGGGGCATGAACCTGGCATAACAATGTAGATTTTC [14006]  
Tgu GTCTGGACATCTGTAGCAGAGGT--TTTGGGGCATGAACCTGGCATAACAATGTAGATTTTC [11408]  
Cli GTCTGGACATCTGTAGCAGAGAT--TTTGGGGCATGAACCTGGCATAACAATGTAGATTTTC [14066]  
Gga GTCTGGACATCTGTAGCAGAGAT--TTTGGGGCATGAACCTGGCATAACAATGTAGATTTTC [12704]

Xtr GCCTGGACATCTGTGGCTGGTGA--ACTTTGGCGTGCACCTGGCATAACAATGTAGAAAAC [13329]  
Lch GGCTGGACATCTGTAGCTGGAGT--TCTTGGGCATGAACCTGGCATAACAATGTAGAATCC [15118]  
Dre GCCTGGACATCTGTTGCTGGAGA--GTTTTGTGCTGAACCTGGCATAACAATGTAGATTTTC [13745]

Hsa TGTGTTTCGTTAGGCAACAGCTACATTGTCTGCTGGGTTTTCAGGCTACCT--AGGTACCC- [14587]  
Mmu TGTGTTTGTTTAGGCAACAGCTACATTGTCTGCTGGGTTTTCAGGCTACCT--GGGTGCCC- [14418]  
Mdo TGTGTTTATTAAGTAACAGCTACATTGTCTGCTGGGTTTTCAGGCTACCT--TTTTGTCCC [13468]  
Meu TGTGTTTATTAAGTAACAGCTACATTGTCTGCTGGGTTTTCAGGCTACCT---TTTTGTCCC [11712]  
Oan TGTATTTGTTAAGCAACAGCTACATTGTCTGCTGGGTTTTCAAGCTACCT--AGTTGCCCC [12427]  
Aca TG--TTTTGTTAAGCAACAGCTACATTGTCTGCTGGGTTTTCAGGCTGTCT--AGCTGTTCC [14423]  
Pbi TGTGTTTGTTTAAGCAACAGCTACATTGTCTGCTGGGTTTTCAGGCTGTCT--AGCTGCTCA [14858]  
Cpi TGTGTTTGTTTAAGCAACAGCTACATTGTCTGCTGGGTTTTCAAGCTGCCT--AGTTGCCTA [15481]  
Cmy TGTGTTTGTTTAAGCAACAGCTACATTGTCTGCTGGGTTTTCAAGCTGCCT--AGTTGCCTA [15229]  
Psi TGTGTTTGTTTAAGTAACAGCTACATTGTCTGCTGGGTTTTCAAGCTGCCT--AGTTGTCCCT [14014]  
Asp TGTGTTTGTTTAAGCAACAGCTACATTGTCTGCTGGGTTTTCAAGCTGCCT--AGTTGTCCCT [13253]  
Ami TGTATTTCTTAAGCAACAGCTACATTGTCTGCTGGGTTTTCAAGCTGCCT--AGTTGCCCA [14804]  
Asi TGTATTTCTTAAGCAACAGCTACATTGTCTGCTGGGTTTTCAAGCTGCCT--AGTTGCCCA [14064]  
Tgu TGTGTTTGTTTAAGCAACAGCTACATTGTCTGCTGGGTTTTCCAGCTGCCT--AGCTGCCCA [11466]  
Cli TGTGTTTGTTTAAGCAACAGCTACATTGTCTGCTGGGTTTTCCAGCTGCCT--AGTTGCTCA [14124]  
Gga TGTGTTTGTTTAAGCAACAGCTACATTGTCTGCTGGGTTTTCCAGCTGCCT--AGTTGCCCA [12762]  
Xtr TGTGTTTGTCAAAGCAACAGCTACATTGTCTGCTGGGTTTTCATGCTGAAT--CCACTGGAG [13387]  
Lch TGTGTTAGAATAGCAACAGCTACATTGTCTGCTGGGTTTTCAGGCTACCT--AGTTGTCCA [15176]  
Dre TGTGTGGTACTATCTACAGCTACATTGTCTGCTGGGTTTTCAGGCCAGCA--GGGTGCTCA [13803]

Hsa TCAATGGCTCAGTAGCCAGTGTAGATCCTGTCTTTTCGTAATCAGCAGCTACATCTGGCTA [14647]  
Mmu TCAGTGGCTCAGTAGCCAGTGTAGATCCTGTCTTTGGTAATCAGCAGCTACATCTGGCTA [14478]  
Mdo TCATTCGCTCAGTAGTCAGTGTAGATACTGTCTCTTTCCATCAGCAGCTACATCTGGCTA [13528]  
Meu TCATTCGCTCAGTAGTCAGTGTAGATCCTGTCTCTG--AATCAGCAGCTACATCTGGCTA [11770]  
Oan TCAATCGCTCAGTAGTCAGTGTAGATCCTGTATTC--TAATCAGCAGCTACATCTGGCTA [12485]  
Aca TCAGTCGCTCAGTAGTCAGTGTAGATTCTGTCTTCT--CAATCAGCAGCTACATCTGGCTA [14482]  
Pbi TCAGTCGCTCAGTAGTCAGTGTAGATTCTGTCTTCT--CGGTGAGCAGCTACATCTGGCTA [14917]  
Cpi TCAGTCGCTCAGTAGTCAGTGTAGATTCTGTCTTTA--CAATCAGCAGCTACATCTGGCTA [15540]  
Cmy TCAGTCGCTCAGTAGTCAGTGTAGATTCTGTCTTTA--CAATCAGCAGCTACATCTGGCTA [15288]  
Psi TCAGTCGCTCAGTAGTCAGTGTAGATTCTGTCTTTA--CAATCAGCAGCTACATCTGGCTA [14073]  
Asp TCAGTCGCTCAGTAGTCAGTGTAGATTCTGTCTTTA--CAATCAGCAGCTACATCTGGCTA [13312]  
Ami TCAATCGCTCAGTAGTCAGTGTAGATTCTGTCTTTA--CAATCAGCAGCTACATCTGGCTA [14863]  
Asi TCAATCGCTCAGTAGTCAGTGTAGATTCTGTCTTTA--CAATCAGCAGCTACATCTGGCTA [14123]  
Tgu TCAGTCGCTCAGTAGTCAGTGTAGATTCTGTCTTTA--CAATCAGCAGCTACATCTGGCTA [11525]  
Cli TCAATCGCTCAGTAGTCAGTGTAGATCCTGTCTTTA--CAATCAGCAGCTACATCTGGCTA [14183]  
Gga TCAATCGCTCAGTAGTCAGTGTAGATTCTGTCTTTA--CAATCAGCAGCTACATCTGGCTA [12821]  
Xtr TTGTTTCGCTCAGTAATCAGTGTAGATCCTGTATAT--CTGTGAGCAGCTACATCTGGCTA [13445]  
Lch TGAGTTGCTCAGTAGTCAGTGTAGATTCTGTGTCT--CAATCAGCAGCTACATCTGGCTA [15234]  
Dre TGAGATGCTCAGTAGTCAGTGTAGATCCTGTGTCA--CAATCAGCAGCTACATCTGGCTA [13861]

Hsa CTGGGTCTCTGATGGCATCTT----- [14668]  
Mmu CTGGGTCTCTGGTGGCATCAT----- [14499]  
Mdo CTGGGTCTCTGATGGCATCTT----- [13549]  
Meu CTGGGTCTCTGATGGCATTTT----- [11791]  
Oan CTGGGTCTCTGAGGGTACCTT--GGATGCTAATTGGCTGCTCAGTAGTTGGTGTAGGATC [12543]  
Aca CTGGGTCTCTGAGGACATCTT--GGATGCCAATGGGCTGCTCAGTAGTCGGTGTAGAATC [14540]  
Pbi CTGGGTCTCTGAAGACGTCTT--TGATGTGAACAGGCTGCTCAGTAGTTGGTGTAGGATC [14975]  
Cpi CTGGGTCTCTGATGACATCTT--TAGATGCAATTGGCTGCTCAGTAGTCGGTGTAGGATC [15598]  
Cmy CTGGGTCTCTGATGACATCTT--TAGATGCAATTGGCTGCTCAGTAGTCGGTGTAGGATC [15346]  
Psi CTGGGTCTCTGATGACATCTC--AAGATGCAATTGGCTGCTCAGTAGTCGGTGTAGGATC [14131]  
Asp CTGGGTCTCTGATGACATCTC--AAGATGCAATTGGCTGCTCAGTAGTCGGTGTAGGATC [13370]  
Ami CTGGGTCTCTGATGACATCTT--TGGATGTAATTGGGTGCTCAGTAGTCGGTGTAGAATC [14921]  
Asi CTGGGTCTCTGATGACATCTT--TGGATGTAATTGGCTGCTCAGTAGTCGGTGTAGAATC [14181]



Tgu CTGGGTCTCTGATGACATCT----- [11545]  
Cli CTGGGTCTCTGATGACAATC--ATGGTGCTCTTGGCTGCTCAGTAGTCGGTGTAGGATC [14241]  
Gga CTGGGTCTCTGATGACATCTC--ACGGTGCCCTTGGCTGCTCAGTAGTCAGTGTAGGATC [12879]  
Xtr CTGGGTCTCTAACTCCATTGC----- [13466]  
Lch CTGGGTCTCTAATGGCAACAC--GGATGCTTGTGGCCGCTCAGTACTCAGTGTAGAGTC [15292]  
Dre CTGGGTCTCTGATGGCATT---TGACGTGATCTGCAGACTCAGTACTCGGTGTAGAGTC [13919]

Hsa -----GCA [14671]  
Mmu -----GCA [14502]  
Mdo -----TCA [13552]  
Meu -----GCA [11794]  
Oan TGTCTGACATGATTAAAGAACAGCTACATCTGATTACTGGGTCACCGATAGCATCA--GCA [12601]  
Aca TGTCTGA---TGATACCCACAGCTACATCTGATTACTGGGTTTCTGTGGCATCA--GCA [14595]  
Pbi TGTCCGA---TAAAACCAACAGCTACATCTGATTACTGGGTCCTGTGGCATCA--TCA [15030]  
Cpi TGTCTGACATTATTACCAACAGCTACATCTGATTACTGGGTCAGTATAGCATCA--GCA [15656]  
Cmy TGTCTGACATTATTACCAACAGCTACATCTGATTACTGGGTCACCGATAGCATCA--GCA [15404]  
Psi TGTCTAACATTGCTACCAACAGCTACATCTGATTACTGGGTCGCTGATGGCATCG--GCA [14189]  
Asp TGTCTAACATTGCTACCAACAGCTACATCTGATTACTGGGTCAGTATAGCATCA--GCA [13428]  
Ami TGTCTGACATTGATACCAACAGCTACATCTGATTACTGGGTCAGTAAATGTCATCA--GCA [14979]  
Asi TGTCTGACATTGATACCAACAGCTACATCTGATTACTGGGTCAGTAAATGTCATCA--GCA [14239]  
Tgu -----GCA [11548]  
Cli TGTCTGACAGTCTCGCTAACAGCTACATCTGATTACTGGGTCACCAAAGGGTGAC--GCG [14299]  
Gga TGTCCGACAGTCTCACTAACAGCTACATCTGATTACTGGGTCACCAAAGGACCAC--GCA [12937]  
Xtr -----TAA [13469]  
Lch TGTCTGACATTAATA--AACAGCTACATCTGATTACTGGGTCAGTACAGCATCC--CCA [15348]  
Dre TGTGTGATTTCAGAAG--AGCAGCTACATCTGAATACTGGGTCAGTGGAGACGTCA--TAG [13975]

Hsa GTGCCACGCTCCGTGTATTTGACAAGCTGAGTTGGACACTCCAT--GTGGTAGAGTGTCA [14729]  
Mmu GTGTCACGCTCCGTGTATTTGACAAGCTGAGTTGGACACTCTGT--GTGGTAGAGTGTCA [14560]  
Mdo GTGCCACACTCCGTGTATTTGACAAGCTGAGTTGGACACTCCGT--GTCGTAGAGTGTCA [13610]  
Meu GTGCCACACTCCGTGTATTTGACAAGCTGAGTTCAGACTCCGT--GTGGTAGAGTGTCA [11852]  
Oan GTGCCGCGCTCCGTGTATTTGACAAGCTGAGTTGGACACTCCGT--GTGGTTGAGTGTCA [12659]  
Aca GGGCTTCCCTCCGTGTATTTGACGATCTGA--TCGCACACTCCGTCTGCACCAGAGTGTCA [14654]  
Pbi GTGTTGCCCTCTGTGTATTTGACAAGCTGGGTTCAACTCAGT--GTAGCA--GTGTCA [15086]  
Cpi GTGCTGCGCTCCGTGTATTTGACAAGCTGAGTTTGGACTCAAT--GTGGCAGAGTGTCA [15714]  
Cmy GTGCTGCGCTCCGTGTATTTGACAAGCTGAGTTTGGACTCAGT--GTGGCAGAGTGTCA [15462]  
Psi GTGCTGCACTCCGTGTATTTGACAAGCTGAGTTTGGACTCAGT--GTGGCAGAGTGTCA [14247]  
Asp GTGCTGCACTCCGTGTATTTGACAAGCTGAGTTTGGACTCAGT--GTGGCAGAGTGTCA [13486]  
Ami GTGCTGCACTCCGTGTATTTGACAAGCTGAGTTTGGACTCAGT--GTGGCAGAGTGTCA [15037]  
Asi GTGCTGCACTCCGTGTATTTGACAAGCTGAGTTTGGACTCAGT--GTGGCAGAGTGTCA [14297]  
Tgu GTGTGGCACTGCGTGTATTTGACAAGCTGAGTCCGACTCAGT--GTG--CAGAGTGTCA [11605]  
Cli GTGCCGCGCTGCGTGTATTTGACAAGCTGAGTCCGACTCAGT--GCG--AGAGTGTCA [14355]  
Gga GTGCAGCACTGCGTGTATTTGACAAGCTGAGTTTGGACTCAGT--CTGGCAGAGTGTCA [12995]  
Xtr GTGTGGCACTGAGTGTATTTGACAAGCTGAGTCCGACTCAAT--GAGACAGAGTGTCA [13527]  
Lch GCACAGCGCTCAGTGTATTTGACAAGCTGAATTCGACTCAGT--TCTGTAGAGTGTCA [15406]  
Dre ACTCTTCTCTTAGAGTATTTGACAGACTGTGGTTGACTCAGT--CTAAAGGGGTGTCA [14033]

Hsa GTTTGTCAAATACCCCAAGTGCGGCACA--GACATGCTGTCCACAGTGTGTTTGTATAAGC [14787]  
Mmu GTTTGTCAAATACCCCAAGTGCGGCTCA--GATGTGCTGTCCACAGTGTATTTGTATAAGA [14618]  
Mdo GTTTGTCAAATACCCCAAGTGAGGCATT--GACAACTGTCCAGAGTGTGTTTGTATAATC [13668]  
Meu GTTTGTCAAATACCCCAAGTGAGACATT--GATAAACTGTCCAGAGTGTGTTTGTATAAGC [11910]  
Oan GTTTGTCAAATACCCCAAGTGAGGCATT--AACACACTGTCCCTCAGTGCCTTTGTATAAGC [12717]  
Aca GTTTGTCAAATATACAAAGGGCGGCCTC----- [14682]  
Pbi GTTTGTCAAATATACAAAGTGCGGCATT--AACAGAACATCCACAGTGTGTTTGTATAAGC [15144]  
Cpi GTTTGTCAAATACCCCAAGTGAAGCATT--GATATACTGTCAATAGTGTGTTTGTATAACC [15772]  
Cmy GTTTGTCAAATACCCCAAGTGAGGCATT--GATATACTGTCCACAGTGTGTTTGTATAACC [15520]  
Psi GTTTGTCAAATACCCCAAGTGAGGCATT--AACACACTGTCCCAAGTGTGTTTGTATAAGC [14305]

```
Asp GTTTGTCAAATACCCCAAGTGAGGCATT--AATACATTGTCCCCAGTGTGTTTGTATGAGC [13544]
Ami GTTTGTCAAATACCCCAAGTGAGGCATT--GACATATTGTCCATAGTGTGTTTGTATAAGC [15095]
Asi GTTTGTCAAATACCCCAAGTGAGGCATT--GACATATCGTCCATAGTGTGTTTGTATAAGC [14355]
Tgu GTTTGTCAAATACCCCAAGTGAGGCACT--GGCAAAGTGTCTCAGTGTGTTTGTATAAGC [11663]
Cli GTTTGTCAAATACCCCAAGCGAGGCACT--GACAGACTGTCCACAGTGTGTTTGTATAAGC [14413]
Gga GTTTGTCAAATACCCCAAGTGAGGCACT----- [13023]
Xtr GTTTGTCAAATACCCCAAGTGAGGCACC----- [13555]
Lch GTTTGTCAAATACCCCAAGTGAGGTGTT--CATTACAGTCCATAGTGTGTTTGTATAAGC [15464]
Dre GTTTGTCAAATACCCCAAGAGAGGGGGC----- [14061]

Hsa TGACATGGGACAGGGATTCTTT-----TTCAGTGTGTGTCAGTTTATCAAACCCATA [14839]
Mmu TGACATAGGAGAGGAACCTTCT-----TTCACCTTTGTGTGTCAGTTTATCAAACCCATA [14670]
Mdo TGACATGGGACAGAGGTTCTTT-----TTCAGTGTGTGTCAGTTTATCAAACCCATA [13720]
Meu TGACATGGGACAGGCTTACTTT-----TTCAGTGTGTGTCAGTTTATCAAACCCATA [11962]
Oan TAACATGAGACAGGAGCTTTTTT-----TTCACGGTTGTGTGTCAGTGTATCAGACACAAG [12770]
Aca ----- [14682]
Pbi TGACATGGGACAGGAATTCTTT-----TTCAGTGTGTGTCAGTTTATCAAACCCATA [15197]
Cpi TGATGTGGGACAGGAGTTCTTT-----TTCAGTGTGTGTCAGTTTATCAAACCCCTGG [15824]
Cmy TGATGTGGGACCGGAGTTCTTT-----TTCGCTGTGTGTCAGTTTCTCAAACCTATA [15572]
Psi TGATATTATATGGGAGGTTTCGCCCCG--CCCTCCGTTGTATCAGTTTATCAAACCCATA [14363]
Asp TGATATGATATGGGAGGTTTCGCCCCCAACCCCTGCTGTGTCAGTTTATCAAACCCATA [13604]
Ami TGACATGGGACAGGAGTTCTTT-----TTCAGTGTGTGTCAGTTTATCAAACCCATA [15147]
Asi TGACATGGGACAGGAGTTCTTT-----TTCAGTGTGTGTCAGTTTATCAAACCCATA [14407]
Tgu TGACGTGGGACAGGATTTCTTT-----TTTGCTGCTGTGTCAGTATATCAAATCATA [11715]
Cli TGACATGGGACAGGATTTCTTT-----TTCAGTGTGTGTCAGTATATCAAACCTCATA [14465]
Gga ----- [13023]
Xtr ----- [13555]
Lch AGACATGAGACAGGCATCTTT-----CTCACTGTGTGTCAGTTTCATCAAACCCATA [15516]
Dre ----- [14061]

Hsa CTTGGATGA--GGCTGTCTCTCCAACAATATCCTGGTGCTG---AGTG-ATGACTCAG- [14892]
Mmu CCTGGATGA--GGCCGTCTCCCCAACAATATCCTGGTGCTG---AGTGGGTG-CACAG- [14723]
Mdo CCTGGATAC--GGCCTTCTCCCCAACAATATCCTGATGCTG---AGTGAGCGGCACAT- [13774]
Meu CCTGGACAC--GGCCTTCTCCCCAACAATATCCTGATGCTG---AGTGAGCGGCACAC- [12016]
Oan CCTGAGCAC----- [12779]
Aca -----GCTCCTTGTCCTCAACAATATCCTGGTGCTG---AGTGAGTGGCACTC- [14727]
Pbi CGTGGATAG--GTTTCTCCCCGTCAACAATATCCTGGTGCTG---AGTGAGTGGCACTC- [15251]
Cpi AAGCCCTG--GCTTCTCTCCCCAACAATATCCTGGTGCTG---AGTGAGTTGCACAC- [15878]
Cmy CATGGACAT--GCTTCCCCCTCCCCAACAATATCCTGGTGCTC---AGTGAGTTGCACAC- [15626]
Psi CCTGGACAT----- [14372]
Asp CCTGGACAT----- [13613]
Ami CCTGGACAT--CTCCCGCTCCCCAACAATATCCTGGTGCTG---AGCGAGTTGCGCAC- [15201]
Asi CCTGGACAT--CTCCCGCTCCCCAACAATATCCTGGTGCTG---AGCGAGTTGCGCAC- [14461]
Tgu CCTGCACAT----- [11724]
Cli CCTGGTCAT--GCTCCTCTGCCCAACAATATCCTGGTGCTG---AGTGAGTTGCAGAC- [14519]
Gga -----GCTCCTCTGCCCAACAATATCCTGGTGCTG---AGTGAGTTGCACAC- [13068]
Xtr -----GTTTGTCCCTGGAACAATATCCTGATGCTG---AATGAGTGGGACAT- [13600]
Lch CCTGGACAT--GTTACCTGCTACAACAATATCCTGGTGCTG---AATGAGTGGGACTTG [15571]
Dre -----GGTGTCTCCTGGCAACAATATCCTGGTGCTG---CCTGAGTACATCTC- [14106]

Hsa -GCGACTCCAGCATCAGTGATTTTGTGTTGAAGAGGGCAGCT----- [14931]
Mmu --TGACTCCAGCATCAGTGATTTTGTGTTGAAGAGGGCAGCT----- [14761]
Mdo GGAGACTCCAGCATCAGTGATTTTGTGTTGAAGAGGGTGGCT----- [13814]
Meu AGAGACTCCAGCATCAGTGATTTTGTGTTGAAGAGGGTGGCT----- [12056]
Oan ----- [12779]
Aca AAAGACTCCAGCATCAGTGATTTTGTGTTGAAGAGGGTGGCT----- [14767]
Pbi AGAGACTCCAGCATCAGTGATTTTGTGTTGAAGAGGGGTGGCT----- [15291]
```

```
Cpi GGAGACTCCAGCATCAGTGATTTTGTGTTGAAGAGGGCGAGC--TTATTTCTGGCAACACTA [15936]
Cmy GGAGACTCCAGCATCAGTGATTTTGTGTTGAAGAGGGCGAGC--TTATTTCTGGCAACACTA [15684]
Psi -----TTATTTCTGGCAACACTA [14390]
Asp -----TTATTTCTGGCAACACTA [13631]
Ami AGAGACTCCAGCATCAGTGATTTTGTGTTGAGGAGGGCGAGC--TTATTTCTGGCAACACTA [15259]
Asi AGAGACTCCAGCATCAGTGATTTTGTGTTGAGGAGGGCGAGC--TTATTTCTGGCAACACTA [14519]
Tgu -----TTACTTCTAGCAACACTA [11742]
Cli AGAGACTCCAGCATCAGTGATTTTGTGTTGAGGAGGGGGTGC--TTACTTCTAGCAACACTA [14577]
Gga AGAGACTCCAGCATCAGTGATTTTGTGTTGAGGAAGGGGAGC--TTACTTCTAGCAGCACTA [13126]
Xtr ACATGCTCCAGCATCAGTGATTTTGTGTTGCAGGCGGCACAC--TTACTTCTGGCAACAATA [13658]
Lch GGAGACTCCAGCATCAGTGATTTTGTGTTGCGGAGGGTGATC--TTGCCTCTGACAACAATA [15629]
Dre ACAGACTCCAGCATCAGTGATTTTGTGTTGCCGGGGGAAAAC--TGCCTGCTGAGAACAATA [14164]

Hsa ----- [14931]
Mmu ----- [14761]
Mdo ----- [13814]
Meu ----- [12056]
Oan ----- [12779]
Aca ----- [14767]
Pbi ----- [15291]
Cpi TCCTGATGCTGTCAGAGTATGTGGTA--AAGCTCCAGCATCAGTGATTTTGTGTTAGTGT [15994]
Cmy TCCTGATGCTGTCAGAGTATGTGGTA--AAGCTCCAGCATCAGTGATTTTGTGTTAGTGT [15742]
Psi TCCTGATGCTGTCAGAGTATGTGGTA--AAGCTCCAGCATCAGTGATTTTGTGTTAGTGT [14448]
Asp TCCTGATGCTGTCAGAGTATGTGGTA--AAGCTCCAGCATCAGTGATTTTGTGTTAGTGT [13689]
Ami TCCTGATGCTGTCAGAGTATGTGGTA--AAGCTCCAGCATCAGTGATTTTGTGTTAGTGT [15317]
Asi TCCTGATGCTGTCAGAGTATGTGGTA--AAGCTCCAGCATCAGTGATTTTGTGTTAGTGT [14577]
Tgu TCCTGATGCTGTCAGAGTAAAGTGGTA--AAGCTCCAGCATCAGTGATTTTGTGTTAGTGT [11800]
Cli TCCTGATGCTGTCAGAGTAAAGTGGTA--AAGCTCCAGCATCAGTGATTTTGTGTTAGTGT [14635]
Gga TCCTGATGCTGTCAGAGTAAAGTGGTA--AAGCTCCAGCATCAGTGATTTTGTGTTAGTGT [13184]
Xtr TCCTGATGCCGTCTGAGTGTGCGGGA--AAGCTCCAGCATCAGTGATTTTGTGTTAGTGT [13716]
Lch TCCTGGTGTCTCCGAGTATGTGGAA--AAGCTCCAGCATCAGTGATTTTGTGTTAGTGT [15687]
Dre TCCTGATGCTGAATGAGTGTGTTGAAGGAAACTCCAGCATCAGTGATTTTGTGTTGCCAGAG [14224]

Hsa -----TTTTGCTGTTGTCGGGTGGATCACGATGCAA--TTTTGATGAGTATCATAGG-- [14981]
Mmu -----TTTTGCTGTTATCAGGTGGAACACGATGCAA--TTTTGGTTGGTGTAAATAGG-- [14811]
Mdo -----TTTTGCTGT-GTCGGGTGGATCACGATGCAAATTTTGATAAGTTTAATAGG-- [13864]
Meu -----GTTTGTGTTGTCGGGTGGATCACGATGCAA--TTTTGATAAGTTTAGTAGG-- [12106]
Oan -----TTTTGCTGTTGTCGGGTGGATCACGATGCAA--TTTTGATTAGTTTAGTAGG-- [12829]
Aca -----TTTTGCTGTTGTCGGGTGGATCACGATGCAA--TTTTGATTAGATTAGCAGG-- [14817]
Pbi -----TGTTGCTGTTGTCGGGTGGATCACGGTGC--TTTTGATTAGATTAGCAGG-- [15341]
Cpi GTAAA--TTTTGCTGTTGTCGGGTGGATCACGATGCAA--TTTTGATTAGTTTAGCAGG-- [16049]
Cmy GTAAA--TTTTGCTGTTGTCGGGTGGATCACGATGCAA--TTTTGATTAGTTTAGCAGG-- [15797]
Psi GTAAA--TTTTGCTGTTGTCGGGTGGATCACGATGCAA--TTTTGATTAGTTTAGCAGG-- [14503]
Asp GTAAA--TTTTGCTGTTGTCGGGTGGATCACGATGCAA--TTTTGATTAGTTTAGCAGG-- [13744]
Ami GTAAA----- [15322]
Asi GTAAA--TTTTGCTGTTGTCGGGTGGATCACGATGCAA--TTTTGATTAGTTTAGAAGG-- [14632]
Tgu GTAAA--TTTTGCTGTTGTCGGGTGGATCACGATGCAA--TTTTGATTAGTTTAGTAGG-- [11855]
Cli GTAAA--TTTTGCTGTTGTCGGGTGGATCACGATGCAA--TTTTGATTAGTTTAGTAGG-- [14690]
Gga GTAAA--TTTTGCTGTTGTCGGGTGGATCACGATGCAA--TTTTGATTAGTTTAGTAGG-- [13239]
Xtr GTAAA--TTTTGTTGTTTCGCGGGTGGATCACGATGCAA--TTTTATTTAGTTTGGTAGG-- [13771]
Lch GTGAA--TCTTGTGTTGTCGGGTGGATCACGATGCAA--TTTT--TTT-GTTTTTGCGA-- [15740]
Dre GAGCAC---TTGCTGTTTTCGGGTGGATGACTCTGCAA--TTTTATTAGTGATGGAAAAAC [14280]

Hsa ---AGAAAAA--TTGCACGGTATCCATCTGTAAACCGCAGG--CCATTACTGTTGCTAATA [15035]
Mmu ---AGAAAAA--TTGCACGGTATCCATCTGTAAACCGCAGG--CCGTCACTGTTGCTAACA [14865]
Mdo ---AGAAAAAATTTGCACGGTATCCATCTGTAAACCGCAAG--CCACTACTGTTGCTAACA [13919]
Meu ---AGAAAAA--TTGCACGGTATCCATCTGTAAACCGCAAG--CCACTACTGTTGCTAACA [12160]
```

Oan ---AGAAAAA-TTGCACGGTATCCATCTGTAAACCGCAGG--CCATTACTGTTGCTAACA [12883]  
Aca ---ACGAAAA-TTGCACGGTATCCATCTGTAAACCGCAGG--CCTTTACTGTTGCTAATG [14871]  
Pbi ---ACGGAAA-TTGCACGGTATCCATCTGTAAACCGCAGG----- [15377]  
Cpi ---AGAAAAA-TTGCACGGTATCCATCTGTAAACCGCAGG--CCACTACTGTTGCTAATA [16103]  
Cmy ---AGAAAAA-TTGCACGGTATCCATCTGTAAACCGCAGG--CCACTACTGTTGCTAATA [15851]  
Psi ---AGAAAAA-TTGCACGGTATCCATCTGTAAACCGCAGG--CCACTACTGTTGCTAACA [14557]  
Asp ---AGAAAAA-TTGCACGGTATCCATCTGTAAACCGCAGG--CCACTACTGTTGCTAACA [13798]  
Ami -----CTGCTACTGTTGCTAATA [15340]  
Asi ---AGAAAAA-TTGCACGGTATCCATCTGTAAACCGCAGG--CTGCTACTGTTGCTAATA [14686]  
Tgu ---AGAAAAA-TTGCACGGTATCCATCTGTAAACCGCAAG--CTAATACTGTTGCTAATA [11909]  
Cli ---AGAAAAA-TTGCACGGTATCCATCTGTAAACCGCAAG--CTAATACTGTTGCTAATA [14744]  
Gga ---AGAAAAA-TTGCACGGTATCCATCTGTAAACCGCAAG--CTAATACTGTTGCTAACA [13293]  
Xtr ---AGAAAAA-TTGCACGGTATCCATCTGTAAACCGCAGA--CAGTTACTGTTGCCTATG [13825]  
Lch ---TTTAAAA-TTGCACGGTATCCATCTGTAATCCGCTAG----- [15776]  
Dre TTCAATAAAAATTGCACGGTATCCATCTGTAATCCGCTGG----- [14320]

Hsa TGCAA-CTCTGTTGAATATAAAATTGGAATTGCACTTTAGCAATGGTGATGG--GGCCCTC [15092]  
Mmu TGCAA-CTCTGTTGAATAGAAAATTGGAATTGCACTTTAGCAATGGTGATGG--GGTCTTC [14922]  
Mdo TGCAA-CTCTGTTCTATGTAAACGGGAATTGCACTTTAGCAATGGTGATGG--GACTCTC [13976]  
Meu TGCAA-CTCTGTTATATGTAAACGGGAATTGCACTTTAGCAATGGTGATGG--CCCCTCC [12217]  
Oan TGCAA-CTCTGTTATGTATAAACTGGAATTGCACTTTAGCAATGGTGATGG----- [12933]  
Aca TGCAA-CTCTGTTATGTATAAATCTGGAATTGCACTTTAGCAATGGTGATGG--CTACTGC [14928]  
Pbi -----CACTAGC [15384]  
Cpi TGCAA-CTCTGTTGTGTAAAAGCTGGAATTGCACTTTAGCAATGGTGATGG--CAACCTC [16160]  
Cmy TGCAA-CTCTGTTGTGTAAAAGCTGGAATTGCACTTTAGCAATGGTGATGG--CAACCTC [15908]  
Psi TGCAA-CTCTGTTGTGTAAAAGCTGGAATTGCACTTTAGCAATGGTGATGG--CAACCTC [14614]  
Asp TGCAA-CTCTGTTGTGTAAAAGCTGGAATTGCACTTTAGCAATGGTGATGG----- [13848]  
Ami TGCAA-CTCTGTTATGTCAAAAATTGGAATTGCACTTTAGCAATGGTGATGG--CGCCCTC [15397]  
Asi TGCAA-CTCTGTTACGTCAAAAATTGGAATTGCACTTTAGCAATGGTGATGG--CGCCCTC [14743]  
Tgu TGCAA-CTCTGTTGTATAAAAAATTGGAATTGCACTTTAGCAATGGTGATGG--GCATCTC [11966]  
Cli TGCAA-CTCTGTTGTATAAAAAATTGGAATTGCACTTTAGCAATGGTGATGG--GCAACTC [14801]  
Gga TGCAA-CTCTGTTGTATAAAAAATTGGAATTGCACTTTAGCAATGGTGATGG--GCGACTC [13350]  
Xtr TGCAAACCTCTGTGCTATATTGTCTAGAATTGCACTGTAGCAATGGTGACTG--CCGGCTC [13883]  
Lch -----GACTTTC [15783]  
Dre -----ATAAAAC [14327]

Hsa CGCTCCC-GCCCCGCGACGAGCCCC-TCGCACA-ACCGGACCTGAGCGTTTTGTTTCGTT [15149]  
Mmu CGCTCCG-GCCCCGCGACGAGCCCC-TCGCACA-ACCGGACCTGAGCGTTTTGTTTCGTT [14979]  
Mdo CGCTCCC-GACCCGCGCCGAGCCCC-TCGCACA-ACCGGACCTGAGCGTTTTGTTTCGTT [14033]  
Meu CGCTCCCCGCCCCGCGCCGAGCCCCCTCGCACAACCGGAC-TGAACGTATTGTTTCGTT [12276]  
Oan ----- [12933]  
Aca TGTGCTT-GCCTCGCGTCGAGCCCCACGCACAAG-ACCTGACGTGAATGTTTTGTTTCGTT [14986]  
Pbi TGGGCTT-GCCTCGCGTCGAGCCCCACGCACAAG-ACCTGACGTGAATGTTTTGTTTCGTT [15442]  
Cpi TGCACTT-GCCTGGCGTCGAGCCCCACGTGCAAG-ACCTGACGTGAACGTTTTGTTTCGTT [16218]  
Cmy TGCACTT-GCCTGGCGTCGAGCCCCACGTGCAAG-ACCTGACGTGAACGTTTTGTTTCGTT [15966]  
Psi TGCACTT-GCCTGGCGTCGAGCCCCACGTGCAAG-ACCTGACGTGAACGTTTTGTTTCGTT [14672]  
Asp ----- [13848]  
Ami TGCGCCT-GCCTGGCGTCGAGCCCCACGTGCAAG-ACCTGACGTGAATGTTTTGTTTCGTT [15455]  
Asi TGCGCCT-GCCTGGCGTCGAGCCCCACGTGCAAG-ACCTGACGTGAATGTTTTGTTTCGTT [14801]  
Tgu TGCACTT-GCCTGGCGTCGAGCCCCACGTGCAAT-ACCTGACCTGAACGTTTTGTTTCGTT [12024]  
Cli TGCACTT-GCCTGGCGTCGAGCCCCACGTGCAAG-ACCTGACCTGAACGTTTTGTTTCGTT [14859]  
Gga TGCACTT-GCCTGGCGTCGAGCCCCACGTGCAAG-ACCTGACCTGAACGTTTTGTTTCGTT [13408]  
Xtr CGCACTT-GCCTGACGCCGAGCCTGACGTGCAAT-GCTTTGTGTCAACGTTTTGTTTCGTT [13941]  
Lch TGCACTT-GCCTCACGTTGAGCCAGACTAACAAT-ACCTGAAGTCAAAGTTTTGTTTCGTT [15841]  
Dre TGCACTT-GCTTTACGTTGAGCCACACGCACAAT-ACATGTGGATTTCAGTTTTGTTTCGTT [14385]

Hsa CGGCTCGCGTGAGGCAGGGCGGCCCTC--CTCAGATCAGAAGGTGATTGTGGCTTTGGGT [15207]

---

Mmu CGGCTCGCGTGAGGCAGGGCGGCTTC--CTCAGATCAGAAGGTGACTGTGGCTTTGGGT [15037]  
Mdo CGGCTCGCGTGAGGCAGGGCGACCAG--CTCAGATCAGAAGGTGATTGTGGCTTTTCGGT [14091]  
Meu CGGCTCGCGTGAGGCAGGGCGGTCTA----- [12303]  
Oan -----CTCAGATCAGAAGGTGATTGTGGCTTTGGGT [12964]  
Aca CGGCTCGCGTTAGGCAGGTCCAGCCTA--CTCAGATCAGAAGGTGATTGTGGCTTTGCTT [15044]  
Pbi CGGCTCGCGTTAGGCAGGTCCAGCCTG--CTCAGATCAGAAGGTGATTGTGGCTTTGGTT [15500]  
Cpi CGGCTCGCGTTAGGCAGGTCCAGCCTG--CTCAGATCAGAAGGTGATTGTGGCTTTGAGT [16276]  
Cmy CGGCTCGCGTTAGGCAGGTCCAGCCTG--CTCAGATCAGAAGGTGATTGTGGCTTTGAGT [16024]  
Psi CGGCTCGCGTTAGGCAGGTCCAGCCTG--CTCAGATCAGAAGGTGATTGTGGCTTTGACT [14730]  
Asp -----CTCAGATCAGAAGGTGATTGTGGCTTTGAGT [13879]  
Ami CGGCTCGCGTTAGGCAGGCCAGCCTG--CTCAGATCAGAAGGTGATTGTGGCTTTGAGT [15513]  
Asi CGGCTCGCGTTAGGCAGGCCAGCCTG--CTCAGATCAGAAGGTGATTGTGGCTTTGAGT [14859]  
Tgu CGGCTCGCGTTAGGCAGGTCCAGCCCA--CTCAGATCAGAAGGTGATTGTGGCTTTGAGT [12082]  
Cli CGGCTCGCGTTAGGCAGGTCCAGCCCA--CTCAGATCAGAAGGTGATTGTGGCTTTGAAT [14917]  
Gga CGGCTCGCGTTAGGCAGGTCCAGCCTG--CTCAGATCAGAAGGTGATTGTGGCTTTGGGT [13466]  
Xtr CGGCTCGCGTTAAGCAGGTGCGGCTTG--CTCAGATCAGAAGGTGATTGTGGCTTTTAGT [13999]  
Lch CGGCTCGCGTTACGCAGGTACAGTTTC----- [15868]  
Dre CGGCTCGCGTTAAGCAAGTGCAGAACT----- [14412]

Hsa GGATATTAATCAGCCACAGCACTGCCTGGTCAGAAAGAG--AAAGCGCTTTGGAATGACA [15265]  
Mmu GGATATTAATCAGCCACAGCACTGCCTGGTCAGAAAGAG--AAAGTGCTTTGGAATGACA [15095]  
Mdo AGACATGGAACAGCCACATCACTGGCTGGTCAGAAAGAG--AAAGTGCTTTGGAATGACA [14149]  
Meu -----AAAGCGCTTTGGAATGACA [12322]  
Oan AGCTACTAAGCAGCCACAACACTGCCTGGTCAGAAAGAG--AAATCGCTTTGGAATGACA [13022]  
Aca TTATATGAAACAGCCACAGCACTGCCTGGTCAGAAAGAG--GAATGGTTTTGGAATGACA [15102]  
Pbi TGATATGAAACAGCCACAGCACTGCCTGGTCAGAAAGAG--AAATGCGCAGGAATGACA [15558]  
Cpi AGATATTAAGCAGCCACAGCACTGCCTGGTCAGAAAGAG--AAATGCTTTGGAATGACA [16334]  
Cmy AGATATTAAGCAGCCACAGCACTGCCTGGTCAGAAAGAG--AAATGCTTTGGAATGACA [16082]  
Psi AGATACTAAGCAGCCACAGCACTGCCTGGTCAGAAAGAG----- [14769]  
Asp AGATACTAAGCAGCCACAGCACTGCCTGGTCAGAAAGAG----- [13918]  
Ami AGATATTAAGCAGCCACAGCACTGCCTGGTCAGAAAGAG--AGATTGCTTTGGAATGACA [15571]  
Asi AGATATTAAGCAGCCACAGCACTGCCTGGTCAGAAAGAG--AGATTGCTTTGGAATGACA [14917]  
Tgu AAATATTAAGCAGCCACAGCACTGCCTGGTCAGAAAGAG--AGATGGCTTTGGAATGACA [12140]  
Cli AGCTATTAAGCAGCCACAGCACTACCTGGTCAGAAAGAG--AGACGGCTTTGGAATGACA [14975]  
Gga AAATATTTGAGCAGCCACAGCACTGCCTGGTCAGAAAGAG--AGACAGCTTTGGAATGACA [13524]  
Xtr AGATATTAAGCAGCCACAGCACTGCCTGGTCAGAAAGAG--ACTTAGCTTTGGAATGACA [14057]  
Lch ----- [15868]  
Dre ----- [14412]

Hsa CGATCACTCCCCTTGAGTGGGCACCCGAGAAGCCATCGGGAATGTCGTGTCCGCCAGTG [15325]  
Mmu CGATCACTCCCCTTGAGTGGGCACCCAAGAAGCCATCGGGAATGTCGTGTCCGCCAGTG [15155]  
Mdo CGATCACTCCCCTTGAGCGGACAGCCAAGAAGCCATCGGGAATATCGTGTCCGTCCAATG [14209]  
Meu CGATCACTCCCCTTGAGCGGACAGCCAAGAAGCCATCGGGCATATCGTGTCTGTCCAATG [12382]  
Oan CGATCACTCCCCTTGAGCGGACAGCCAAGAAGCCATCGGGAATATCGTGTCCGTCCAAG [13082]  
Aca CGATCACTCCCCTTGAGCGAGCAGAGCCACGGCCA--CGGGGATGTCGTGTCTGTCCAAAA [15161]  
Pbi CGATCACTCCCCTTGAGCGAGTGGACGCAGAGCCA--CGGGGCTGTCGTGTCTGTCTGAG [15617]  
Cpi CGATCACTCCCCTTGAGCAAGCAGCCAGA--GCCATCGGGAATATCGTGTCCGTCCAAG [16392]  
Cmy CGATCACTCCCCTTGAGCGAGCAGCCAGAGAGCCATCGGGAATGTCGTGTCCGTCCAAG [16142]  
Psi ----- [14769]  
Asp ----- [13918]  
Ami CGATCACTCCCCTTGAGCGAGACGCCCAGAGCCATCGGGAATATCGTGTCCGTCCAAG [15631]  
Asi CGATCACTCCCCTTGAGCGAGACGCCCAGAGCCATCGGGAATATCGTGTCCGTCCAAG [14977]  
Tgu CGATCACTCCCCTTGAGCCAGCAGCCAGAGAGCCATCGGGGATGTCGTGTCTTTCCAAG [12200]  
Cli CGATCACTCCCCTTGAGC--GGGCAGCCTGAGGCCATCGGGGATGTCGTGTCTGTCCAAG [15034]  
Gga CGATCACTCCCCTTGAGCACGCAGCCAGAGAGCCATCGGGGATGTCGTGTCTGTCTAAG [13584]  
Xtr CGATCACTCCCCTTGAGCCGAAACTCACAGCGCCATCGGGAATATCGTGTCCGTCCAAG [14117]  
Lch ----- [15868]

```
Dre ----- [14412]

Hsa CTCTTTTCGGC--CCACCACTTAAACGTGGATGTACTTGCCTTTGAAACTAAAGA-AGTAAG [15382]
Mmu CTCTTTTCGGC--CCACCACTTAAACGTGGTTGTACTTGCCTTTAGACCTAAGAA-AGTAAG [15212]
Mdo CTCTTTTCAGC--CCACTACTTAAACGTGGATTTACTTGCCTTTGTTTCTAAAAA-AGTAAG [14266]
Meu CCCTTTTCGGC--CCACCACTTAAACGTGGATTTACTTGCCTTTGTTTCTAAAAA-AGTAAG [12439]
Oan CTCTTTTCGGG--CTGTCACTTAAACGTGGATAAACTTGCCTTTACTTTTAA----AGTAAG [13136]
Aca CTATTTTCAA--CCACTACTTTAATATGAAAGTACTTGTTTTTTGTTCCTTTT--AAAAAG [15217]
Pbi CTTTTTCCAA----- [15627]
Cpi CTTTTTTCGGC--CCACTACTTTAATGTGGAAGTACTTGCCTTTGCTCCTGATAA-AGTAAG [16449]
Cmy CTCTTTTCGGC--CCACTACTTTAATGTGGAAGTACTTGCCTTTGCTCCTGAAAA-AGTAAG [16199]
Psi -----CCACTACTTTAATGTGGAAGTACTTGCCTTTGCTCCTGAAAA-AGTAAG [14816]
Asp -----CCACTACTTTAATGTGGAAGTACTTGCCTTTGCTCCTGAAAA-AGTAAG [13965]
Ami CTCTTTTCGGC--CCAGAACTTTAATGTGGATGTACTTGCCTTTGTTTCTGAAAA-AGTAAG [15688]
Asi CTCTTTTCGGC--CCAGAACTTTAATGTGGATGTACTTGCCTTTGTTTCTGAAAA-AGTAAG [15034]
Tgu CTCTTTTCGGC--CCACAACCTAAATGTGGACGTGCTTGCCTTTGGCTCACAA--GTAAG [12256]
Cli CTCTTTTCGGT--CCATAACTTAAATGTGGATGTACTTGCCTTTGTTTCTGAAAA--GTAAG [15090]
Gga CTCTTTCTGC--CCACAACCTAAATGTGGATGTGCTTGCCTTTGTT--CTGAAAA--GAAAG [13639]
Xtr CTCTCTCTTC--CCACTACTTTAACATTGGTGTACTTTCTATGTCTTTAAAAAGGGTAAG [14175]
Lch ----- [15868]
Dre ----- [14412]

Hsa TGCTTCCATGTTTTGGTGATGG--CTTCAACTTTAACATGGAAGTGCCTTTCTGTGACT-T [15439]
Mmu TGCTTCCATGTTTTGGTGATGG--CTTCAACTTTAACATGGGAATGCCTTTCTGTCTCA-T [15269]
Mdo TGCTTCCATGTTTTAGTGATGG--CTTCTACTTTAACATGGAGGTACTTTCTGTG--T-T [14321]
Meu TGCTTCCATGTTTTAGTGATGG----- [12461]
Oan TGCTTCCATGTTTTAGTGATGG--CTTCTACTTTAACATGGAGGTGCCTTTCTGTG-AT-T [13192]
Aca TGCTTTCATATTTTAGTGATGG--CTTCTACTTTAACATGGAGGTGCCTTTCTGTGCAT-A [15274]
Pbi ----- [15627]
Cpi TGCTTCCATGTTTTAGTGATGG--CTTCTACTTTAACATGGAGGTGCCTTTCTGTGACT-A [16506]
Cmy TGCTTCCATGTTTTAGTGATGG--CTTCTACTTTAACATGGAGGTGCCTTTCTGTGACT-A [16256]
Psi TGCTTCCATGTTTTAGTGATGG--CTTCTACTTTAACATGGAGGTGCCTTTCTGTGACT-A [14873]
Asp TGCTTCCATGTTTTAGTGATGG--CTTCTACTTTAACATGGAGGTGCCTTTCTGTGACT-A [14022]
Ami TGCTTCCATGTTTTGGTGCTGG--CTTCTACTTTAACATGGAGGTGCCTTTCTGTGACTTA [15746]
Asi TGCTTCCATGTTTTAGTGCTGG--CTTCTACTTTAACATGGAGGTGCCTTTCTGTGACTTA [15092]
Tgu TGCTTCCATGTTTTAGTGGTGG--CTTTTACTTTACCATGGAGGTGCCTTTCTGTGACATA [12314]
Cli TGCTTCCATGTTTTGGTGATGG--CTTTTACTTTAACATGGAGGTGCCTTTCTGTGACTTA [15148]
Gga TGCTTCCATGTTTTAGTGATGG--CTTTTACTTTAACATGGAGGTGCCTTTCTGTGATTTT [13697]
Xtr TGCTCCAATGTTTTAGTGGTGG----- [14197]
Lch ----- [15868]
Dre ----- [14412]

Hsa T-AAA-----AGTAAGTGCTTCCATGTTTTAGTAGGAG--CCTTTGCTTTAACATGGGG [15490]
Mmu CGAAG-----AGTAAGTGCTTCCATGTTTTAGTAGAAG--CCTCTGCTTTAACATGGGG [15321]
Mdo TAAAAA-----GGTAAGTGCTTCCATGTTTTGGTAGGAG--TCTCTGCTTTAACATGGGG [14374]
Meu -----TCTCTGCTTTAACATGGGG [12480]
Oan TAAAAA-----AGTAAGTGCTTCCATGTTTTAGTAGAGG--CCTTTGCTTTAACATGGGG [13244]
Aca TAAAAA-----AGTAAGTGCTTCCATGTTTTAGTAGAGG----- [15307]
Pbi ----- [15627]
Cpi TAAAAA-----AGTAAGTGCTTCCATGTTTTAGTAGAGG--CCTTTGCTTTAACATGGGG [16558]
Cmy TAAAAA-----AGTAAGTGCTTCCATGTTTTAGTAGAGG--TCTTTGCTTTAACATGGGG [16308]
Psi TAAAAA-----AGTAAGTGCTTCCATGTTTTAGTAGAGG--CCTTTGCTTTAACATGGAG [14925]
Asp TAAAAA-----AGTAAGTGCTTCCATGTTTTAGTAGAGG--CCTTTGCTTTAACATGGAG [14074]
Ami TAAGA-----AGTAAGTGCTTCCATGTTTTAGTAGAGG--CCTTTGCTTTAACATGGAG [15798]
Asi TAAGA-----AGTAAGTGCTTCCATGTTTTAGTAGAGG--CCTTTGCTTTAACATGGAG [15144]
Tgu GAAAA-----AGTAAGTGCTTCCATGTTTTAGTAGAGG--CCTTTGCTTTAACATGGAG [12366]
Cli AAAGA-----AGTAAGTGCTTCCATGTTTTAGTAGAGG--CCTTTGCTTTAACATGGAG [15200]
```

---

---

|     |                                                                |         |
|-----|----------------------------------------------------------------|---------|
| Gga | ACAAA-----AGTAAGTGCTTCCATGTTTTAGTAGAGG--CCTCCGCTTTAACATGGAG    | [13749] |
| Xtr | -----                                                          | [14197] |
| Lch | -----TTGTTGCTCTAACA--GGA                                       | [15885] |
| Dre | -----                                                          | [14412] |
|     |                                                                |         |
| Hsa | GTACCTGCTGTGTGAAACAAAAGTAAGTGCTTCCATGTTTCAGTGGAGG--CCTCTACTTT  | [15548] |
| Mmu | TTACCTGCTGTGTTAAACAAAAGCAAGTGCTTCCATGTTTCAGTGGGGG--CCTTTACTTT  | [15379] |
| Mdo | GTACCTGCTACGTAATA-AAAAGTAAGTGCTTCCATGTTTCAGTGGAGA--CCTCTGCTTT  | [14431] |
| Meu | GTACCTGCTACGTAATAAAAAAGTAAGTGCTTCCATGTTTCAGTGGAGG--CTTCTACTTT  | [12538] |
| Oan | GTACCTGCTACGTAAG--AAAAGTAAGTGCTTCCATGTTTCAGTGGAGG--CTTCTCCTTT  | [13300] |
| Aca | -----                                                          | [15307] |
| Pbi | -----                                                          | [15627] |
| Cpi | GTACCTGCTGCCTAGAAA--AAGTAAGTGCTTCCATGTTTCAGTGGTGG--CCTCTACTTT  | [16614] |
| Cmy | GTACCTGCTGCCTAGAA-----AAAGTGCCTATGTTTCAGTGGTGG--CCTCTACTTT     | [16360] |
| Psi | GTACCTGCTGCCTAGAAA--AAGTAAGTGCTTCCATGTTTCAGTGGTGG--CCTCTACTTT  | [14981] |
| Asp | GTACCTGCTGCCTAGAAA--AAGTAAGTGCTTCCATGTTTCAGTGGTGG--CCTCTACTTT  | [14130] |
| Ami | GTACCTGCTGCCTAAAAA--AAGTAAGTGCTTCCATGTTTCAGTGGTGG--CCTCTACTTT  | [15854] |
| Asi | GTACCTGCTGCCTAAAAA--AAGTAAGTGCTTCCATGTTTCAGTGGTGG--CCTCTACTTT  | [15200] |
| Tgu | GTACCTGCTGCCTAAAAA--AGTAAGTGCTTCCATGTTTCAGTGGCGG--CCTCTACTTT   | [12421] |
| Cli | GTACCTGCTGCTTAGAA--AAGTAAGTGCTTCCATGTTTCAGTGGCGG--CCTCTACTTT   | [15255] |
| Gga | GTACCTGCTGCCTACAA--AAGTAAGTGCTTCCATGTTTCAGTGGTGG--CCTCAACTTT   | [13804] |
| Xtr | -----                                                          | [14197] |
| Lch | GTACATACTGTTGTGAACCTAAGTAAGTGCTTCCCTTGTTAGGGTAATGG-----        | [15934] |
| Dre | -----                                                          | [14412] |
|     |                                                                |         |
| Hsa | TAACATGG-AGGCACTTGCTGTGACATGACAAAAA--TAAGTGCTTCCATGTTTGAGT-G   | [15604] |
| Mmu | TAACATGG-AGGCACTTGCTGTGCATTTAAAAA----TAAGTGCTTCCATGTTTGAGT-G   | [15433] |
| Mdo | TAACATGG-AAGTGCTTGCTGTGATTTTAAAAAAT--TAAGTGCTTCCATGTTTGAGTTG   | [14488] |
| Meu | TAACATGG-AGGTACTTTCTGTGATTTAAAAAAG--TAAGTGCTTCCATGTTTGGTAG     | [12595] |
| Oan | TAACATGG-AGGTACTTGCTGTGAGTTTGAAAAAAT--TAAGTGCTTCCATGTTTGTAGTTG | [13357] |
| Aca | -----                                                          | [15307] |
| Pbi | -----                                                          | [15627] |
| Cpi | TAACATGG-AAGTACTTGCTGGATGCTTGAAAAAG--TAAGTGCTTCCATGTTTGTAGTTG  | [16671] |
| Cmy | TAACATGG-AAGTACTTGCTGGATGCTTGAAAAAG--TAAGTGCTTCCATGTTTGTAGTTG  | [16417] |
| Psi | TAACATGG-AAGTACTTGCTGGATGCTTGAAAAAG--TAAGTGCTTCCATGTTTGTAGTTG  | [15038] |
| Asp | TAACATGG-AAGTACTTGCTGGATGCTTGAAAAAG--TAAGTGCTTCCATGTTTGTAGTTG  | [14187] |
| Ami | TAACATGGGAGGTACTTGCTGGATGCTTGAAAAAG--TAAGTGCTTCCATGTTTGTAGTTG  | [15912] |
| Asi | TAACATGGGAGGTACTTGCTGGATGCTTGAAAAAG--TAAGTGCTTCCATGTTTGTAGTTG  | [15258] |
| Tgu | TAACATGG-AGGTACTTGCTGGATGCCT-AAAAAG--TAAGTGCTTCCATGTTTGTAGTTG  | [12477] |
| Cli | TAACATGGGAGGTACTTGCTGGATGCCTAAAAAAG--TAAGTGCTTCCATGTTTGTAGTTG  | [15313] |
| Gga | TAACATGG-AGGTACTTGCTGGACACCTGAAAAAG--TAAGTGCTTCCATGTTTGTAGTTG  | [13861] |
| Xtr | -----                                                          | [14197] |
| Lch | -----                                                          | [15934] |
| Dre | -----                                                          | [14412] |
|     |                                                                |         |
| Hsa | TGG--CTTGGAATGGCAAGGAAACCGTTACCATTACTGAGTTTAGTAATGGTAATGGTTT   | [15662] |
| Mmu | TGG--CTTGGAATGGCGAGGAAACCGTTACCATTACTGAGTTTAGTAATGGTAACGGTT    | [15491] |
| Mdo | TGG--GGGCAGCCTGGCGGGGAAACCGTTACCATTACTGTGTTTAGTAATGGTAAGGGTT   | [14546] |
| Meu | GAG--ATGGAGCGTGGGAGGAAACCGTTACCATTACTGTGTTTAGTAATGGTAACGGTT    | [12653] |
| Oan | AAG--CGAGGGTCTGGCGAGGAAACCGTTACCATTACTGAGTTTAGTAATGGTAACGGTT   | [13415] |
| Aca | -----GACCGGTGTGTTGGCGAAACCGTTACCATTACTGAGTTTAGTAATGGTAAGGGTT   | [15362] |
| Pbi | -----                                                          | [15627] |
| Cpi | TGG--CCATGGGGCGTCAATGAAACCGTTACCATTACTGACTTTAGTAATGGTAACGGTT   | [16729] |
| Cmy | TGG--CCATGGAGTGTCAATGAAACCGTTACCATTACTGACTTTAGTAATGGTAACGGTT   | [16475] |
| Psi | TGG-----                                                       | [15041] |
| Asp | TGG-----                                                       | [14190] |
| Ami | TGG-----                                                       | [15915] |

```
Asi TGG--CCCCGGGGCGTCGGGGAAACCGTTACCATTACTGAGTTTAGTAATGGTGACGGTT [15316]
Tgu TGG--CCCGCGCCCGGCGGGGAAACCGTTACCATTACTGAGTTTAGTAATGGTAACGGTT [12535]
Cli TGG--CCCGCGCCCGGCGGGGAAACCGTTACCATTACTGTGTTTAGTAATGGTAATGGTT [15371]
Gga TGG--CACATGGCTGGCAGGGAAACCGTTACCATTACTGAGTTTAGTAATGGTAACGGTT [13919]
Xtr -----CTGTAGAGTGGAATGAAACCGTTACCATTACTGAGTTTAGTAATGGTAAGGGTT [14252]
Lch -----TGGGGAAGTGCCAATCAAACCGTTACCATTACTGAATTTAGTAATGGTAAGGGTT [15989]
Dre -----ACAGAGAGAGGCGGCGAAACCGTTACCATTACTGAGTTTAGTAATGGTAAGGGTT [14467]

Hsa CTCTTGCTATACCCAGA--CCAGATCCTAGAACCCTATCAATATTGTCTCTGCTGTGTAA [15720]
Mmu CTCTTGCTGCTCCACA----- [15508]
Mdo CTCCCCTGCGCTGAGT--ATAGATCCATGAACCCTATCAATGTGGTCTCTGCTGTGTAC [14604]
Meu CTCTTGCTGCGCTTGGT--CCAGATCCTAGAACCCTATCGATATTGTCTCTGCTGTGTAC [12711]
Oan CTCTGGCTGGGCCACC--CCAGATCCTGGAACCCTATCGATATTGTCTCTGCTGTGTAA [13473]
Aca CTTCTATCACGCCGACT----- [15379]
Pbi ----- [15627]
Cpi CTACTGCCGCCCCAGCA----- [16746]
Cmy CTACTGCCACGCCAGCA----- [16492]
Psi ----- [15041]
Asp ----- [14190]
Ami ----- [15915]
Asi CTACCGCCGCTCGCCT----- [15333]
Tgu CTGCCGACGGCCGGCAA----- [12552]
Cli CTGCCGACGGCTGGGCG----- [15388]
Gga CTGCTGACAGCCAGGCA----- [13936]
Xtr CTGTTGCTGCTCTTCCA----- [14269]
Lch CTGTTGCTATTCCCACT--CCAGATCCTGGAACCCTATCAATGTTGCCTCTGCTGTGTAG [16047]
Dre CTGCTGCCTTTTCTCAA--CTAATTCTTGGGACCCTATCAGTATTGCCTCTGCTGTCCAC [14525]

Hsa ATAGTTCTGAGTAGTGCAATATTGCTTATAGGGTTTTGGTGTTTGG----- [15766]
Mmu ----- [15508]
Mdo ATAGCTGTAAGTAGTGCAATATTGCTTATAGGGTTTTAGTTTTTTGG----- [14650]
Meu ATAGCTGTGAGTAGTGCAATATTGCTTATAGGGTTTTAGTGTTTGG----- [12757]
Oan ATAGCTGTGAGTAGTGCAATATTGCTTATAGGGTTTTAGTGTTTGG----- [13519]
Aca -----AACTCTGAGGAT [15391]
Pbi -----AACTCTGAGGAT [15639]
Cpi -----AACCTTAAGGAA [16758]
Cmy -----AACCTTAAGGAA [16504]
Psi -----ACCCTTAAGGAA [15053]
Asp -----ACCCTTAAGGAA [14202]
Ami -----AACCTTAAGGAT [15927]
Asi -----AACCTTAAGGAT [15345]
Tgu -----AACCTTAAGGAT [12564]
Cli -----AACCTTAAGGAT [15400]
Gga -----AACCTTAAGGAT [13948]
Xtr -----AGCCTTAAGGAA [14281]
Lch ATGGCTGAGAGTAGTGCAATATTGCTTATAGGGTTTTAGTGTTTGG--ATCCTCAAAGAA [16105]
Dre TGTGTTTACAGAGTAGTGCAATATTGCTAATAGGGTTTTAGGTTTTAG--CATCTTGCAGGC [14583]

Hsa ----- [15766]
Mmu ----- [15508]
Mdo ----- [14650]
Meu ----- [12757]
Oan ----- [13519]
Aca AAGACCCTATCAATATTGCCTCTGCTTCTGTGCTGGATT--CAAGTAGTGCAATATTGCT [15449]
Pbi AAAACCCTATCAATATTGCCTCTGCTTCTTCACTCGGTC--TTAGTAGTGCAATATTGCT [15697]
Cpi GAGACCCTATCAATATTGCCTCTGCTTTTGTGATCAGG--GTAGTAGTGCAATATTGCT [16815]
Cmy GAGACCCTATCAATATTGCCTCTGCTTTTGTGATCAGG--GTAGTAGTGCAATATTGCT [16561]
```



Psi GAGACCCTATCAATATTGCCTCTGCTTTTGTGATCAGG---GTAGTAGTGCAATATTGCT [15110]  
Asp GAGACCCTATCAATATTGCCTCTGCTTTTGTGATCAGG---GTAGTAGTGCAATATTGCT [14259]  
Ami AAGACCCTATCAATATTGCCTCTGCTTTTGTGATCAGG---GTAGTAGTGCAATATTGCT [15984]  
Asi AAGACCCTATCAATATTGCCTCTGCTTTTGTGATCAGG---GTAGTAGTGCAATATTGCT [15402]  
Tgu GAGACCCTATCAATATTGCCTCTGCTTTTGTGATCAGG---GTAGTAGTGCAATATTGCT [12621]  
Cli GAGACCCTATCAATATTGCCTCTGCTTTTGTGATCAGG---GTAGTAGTGCAATATTGCT [15457]  
Gga GAGACCCTATCAATATTGCCTCTGCTTTTGTGCTCAGG---GTAGTAGTGCAATATTGCT [14005]  
Xtr GTGACCCTATCAATATTGCCTCTGCTTTTGTGCTCGGA---GTAGTAGTGCAATATTGCT [14338]  
Lch AAGACCCTATCAATACTGCCTCTGCTTTTGTGAAATAGT---GGAGTAGTGCAATATTGCT [16162]  
Dre GAGACCCTATCAATATTGCCTCTGCTTTTCTCACTGTTTATGGAGTAGTGCAATATTGCT [14643]

Hsa -----CCCTGGCGTGAGGGTATGTGCCCTTTGGACTACATCGT [15803]  
Mmu -----CCCTGGTGTGAGCGTATGTGCCCTTTGGACTACATCGT [15545]  
Mdo -----CCCTGGCGTGAGGGTATGTGCCCTTTGGACTACATCGT [14687]  
Meu ----- [12757]  
Oan ----- [13519]  
Aca TATAGGGTCTTTTCTTTGGGG---CCCTGGCGTGAGGGTATGTGCCCTTTGGACTACATCGT [15507]  
Pbi AATAGGGTCTTTTCTTTGGGG---CCCTGGTGTGAGGGTATGTGCCCTTTGGACTACATCGT [15755]  
Cpi TATAGGGTCTTTTCTTTGGAG---CCCTGGTGTGAGGGTATGTGCCCTTTGGACTACATCGT [16873]  
Cmy TATAGGGTCTTTTCTTTGGAG---CCCTGGTGTGAGGGTATGTGCCCTTTGGACTACATCGT [16619]  
Psi TATAGGGTCTTTTCTTTGGAG---CCCTGGTGTGAGGGTATGTGCCCTTTGGACTACATCGT [15168]  
Asp TATAGGGTCTTTTCTTTGGAG---CCCTGGTGTGAGGGTATGTGCCCTTTGGACTACATCGT [14317]  
Ami TATAGGGTCTTTTCTTTGGAG---CCCTGGTGTGAGGGTATGTGCCCTTTGGACTACATCGT [16042]  
Asi TATAGGGTCTTTTCTTTGGAG---CCCTGGTGTGAGGGTATGTGCCCTTTGGACTACATCGT [15460]  
Tgu TATAGGGTCTTTTCTTTGGAG---CCCTGGTGTGAGGGTATGTGCCCTTTGGACTACATCGT [12679]  
Cli TATAGGGTCTTTTCTTTGGAG---CCCTGGTGTGAGGGTATGTGCCCTTTGGACTACATCGT [15515]  
Gga TATAGGGTCTTTTCTTTGGAG---CCCTGGTGTGAGGGTATGTGCCCTTTGGACTACATCGT [14063]  
Xtr TATAGGGTCTTTTCTTTGAGA---CCCTGGCGTGAGGGTATGTGCCCTTTGGACTACATCGT [14396]  
Lch TATAGGGTCTTTGAATTTGAGG---CCCTGGTGTGAGGGTATGTGCCCTTTGGACTACATCGT [16220]  
Dre TATAGGGTCTTTGACTTTAAGG---CCCTGGTGTGAGGGTATGTGCCCTTTGGACTACATCGT [14701]

Hsa GGAAGCCAGCACCATGCAGTCCATGGGCATATACACTTGCCTCAAGG----- [15850]  
Mmu GAACGC-AGCACCATGCAGTCCACGGGCATATACACTTGCCTCAAGG----- [15591]  
Mdo GGAAGCCAACACCATGCAGTCCATGGGCATATACACTTGCCTCAAGG----- [14734]  
Meu ----- [12757]  
Oan ----- [13519]  
Aca GGGAGCCAGCACCATGCAGTCCATGGGCATATACACTTGCCTCAAGG---TGTATGTGTGA [15565]  
Pbi GGAAAATATCACCATGCAGTCCATGGGCATATACACTTGCCTCAAGG---TGTATGTGTGC [15813]  
Cpi GGAAGCCAGCACCATGCAGTCCATGGGCATATACACTTGCCTCAAGG---TGTATGTGTGA [16931]  
Cmy GGAAGCCAGCACCATGCAGTCCATGGGCATATACACTTGCCTCAAGG---TGTATGTGTGA [16677]  
Psi GGAAACCAGCACCATGCAGTCCATGGGCATATACACTTGCCTCAAGG---TGCATGTGTGA [15226]  
Asp GGAAACCAGCACCATGCAGTCCATGGGCATATACACTTGCCTCAAGG---TGCATGTGTGA [14375]  
Ami GGAAGCCAGCACCATGCAGTCCATGGGCATATACACTTGCCTCAAGG---TGTATGTGTGA [16100]  
Asi GGAAGCCAGCACCATGCAGTCCATGGGCATATACACTTGCCTCAAGG---TGTATGTGTGA [15518]  
Tgu GGAAGCCAGCACCATGCAGTCCATGGGCATATACACTTGCCTCAAGG---TGTGTGTGTGA [12737]  
Cli GGAAGCCAGCACCATGCAGTCCATGGGCATATACACTTGCCTCAAGG---TGCCTGTGTGA [15573]  
Gga GGAAGCCAGCACCATGCAGTCCATGGGCATATACACTTGCCTCAAGG---TGCCTGTGTGA [14121]  
Xtr GGAAGCCAGCACCATGCAGTCCATGGGCATATACACTTGCCTCAAGG---TGTGTGTGTGA [14454]  
Lch GGAAGCCAGCACCATGCAGTCCATGGGCATATACACTTGCCTCAAGG---TGTGTGTGTGT [16278]  
Dre GGAAGCCAGCACCATGCAGTCCATGGGCATATACACTTGCCTCAAGG---TGGTGTGTGT [14759]

Hsa ----- [15850]  
Mmu ----- [15591]  
Mdo ----- [14734]  
Meu ----- [12757]  
Oan ----- [13519]  
Aca GCAGGCATCTTCTCAGCCTACATGTGGATTCCCTAAATCTGCAGGCTGGTTAGATGGTTGT [15625]

Pbi GCAGGCATCTTCTCAGCCTACATGTGGATTCTTAAATCTGCAGGCTGGTTAGATGGTTGT [15873]  
Cpi GCAGGCATCTTTTCAGCCTACATGTGGATTCTTAAATCTGCAGGCTGGTTAGATGGTTGT [16991]  
Cmy GCAGGCATCTTCTCAGCCTACATGTGGATTCTTAAATCTGCAGGCTGGTTAGATGGTTGT [16737]  
Psi GCAGGCATCTTCTCAGCCTACATGTGGATTCTTAAATCTGCAGGCTGGTTAGATGGTTGT [15286]  
Asp GCAGGCATCTTCTCAGCCTACATGTGGATTCTTAAATCTGCAGGCTGGTTAGATGGTTGT [14435]  
Ami GCAGGCATCTTCTCAGCCTACATGTGGATTCTTAAATCTGCAGGCTGGTTAGATGGTTGT [16160]  
Asi GCAGGCATCTTCTCAGCCTACATGTGGATTCTTAAATCTGCAGGCTGGTTAGATGGTTGT [15578]  
Tgu GCAGGCATCTTCTCAGCCTACATGTGGATTCTTAAATCTGCAGGCTGGTTAGATGGTTGT [12797]  
Cli GCAGGCATCTTCTCAGCCTACACGTGGATTCTTAAATCTGCAGGCTGGTTAGATGGTTGT [15633]  
Gga GCAGGCATCTTCTCAGCCTACATGTGGATTCTTAAATCTGCAGGCTGGTTAGATGGTTGT [14181]  
Xtr GCAGGCATCTTCTCAGCCTACATGTAGATTGTCAAATCTGCAGGCTGGTTAGATGGTTGT [14514]  
Lch GCAGGCATCTTCCCAGCCTACATGTGGATTCTTAAATCTGCAGGCTGGTTAGATGGTTGT [16338]  
Dre GCAGGCATCTTTCCAGTCTACATGTGGATCCAGGAGTCTGCAGGCTGGTTAGATGGTTGT [14819]

Hsa ----- [15850]  
Mmu ----- [15591]  
Mdo ----- [14734]  
Meu ----- [12757]  
Oan -----CTCGGTGCAGATGGCAGCGCCATTTTCAGAGCTATAAAACAGTATCATTG [13568]  
Aca CATAcATTC--CATGGTGCAGATGGCAGCGCCATTTTCAGAGCTATAAAACACTCTCACTG [15683]  
Pbi CATAcATTC--CATGGTGCAGATGGCAGCGCCATTTTCAGAGCTATAAAACAGTATCATTG [15931]  
Cpi CATAcGTTC--CATGGTGCAGATGGCAGCGCCATTTTCAGAGCTATAAAACAGTATCATTG [17049]  
Cmy CATAcGTTC--CATGGTGCAGATGGCAGCGCCATTTTCAGAGCTATAAAACAGTATCATTG [16795]  
Psi CATAcGTTC--CATGGTGCAGATGGCAGCGCCATTTTCAGAGCTATAAAACAGTATCGTTG [15344]  
Asp CATAcGTTC--CATGGTGCAGATGGCAGCGCCATTTTCAGAGCTATAAAACAGTATAGTTG [14493]  
Ami CATAcATTC--CATGGTGCAGATGGCAGCGCCATTTTCAGAGCTATAAAACAGTATCATTG [16218]  
Asi CATAcATTC--CATGGTGCAGATGGCAGCGCCATTTTCAGAGCTATAAAACAGTATCATTG [15636]  
Tgu CATGCATTC--CGTGGTGCAGATGGCAGCGCCATTTTCAGAGCTATCAACAGTGTCAATTG [12855]  
Cli CATGCATTC--CGTGGTGCAGATGGCAGCGCCATTTTCAGAGCTATAAAACAGTCTCAATTG [15691]  
Gga CATGCATTC--CGTGGTGCAGATGGCAGCGCCATTTTCAGAGCTATAAAACAGCGTCAATTG [14239]  
Xtr CATAcATTC----- [14523]  
Lch CGTAcATTC--CGAGGTGCAGATGGCAGTGCATTTGCAAAGCTATAAAACAGTATCATTG [16396]  
Dre CACGTAcCC--TGTGGTGCAGATAGCAGCGCCATTTACAGAGCTATAAAGCATCATAGTTG [14877]

Hsa -----TTATTTGCAGTCAGTAACAAAGA [15873]  
Mmu -----TTATTTGCAATCAGTAACAAAGA [15614]  
Mdo ----- [14734]  
Meu ----- [12757]  
Oan CCATAGCTCTTTGAATGGTACTGCCATATGTACTG--TTTCTTGCAGTCAGTAACAAAGA [13626]  
Aca TCATAGCTCTTTGAATGGTACTGCCATATGTACCG----- [15718]  
Pbi TCATAGCTCTTTGAATGGTACTGCCGTATGTACCG----- [15966]  
Cpi TCATAGCTCTTTGAATGGTACTGCCATATGTACTG--TTTCTTGTAAATCAGTAACAAGGA [17107]  
Cmy TCATAGCTCTTTGAATGGTACTGCCATATGTACTG--TTTCTTGTCAATCAGTAACAAGGA [16853]  
Psi TCATAGCTCTTTGAATGGTACTGCCATATGTACTG--TTTCTTGTAAATCAGTAACCAGGA [15402]  
Asp TCATAGCTCTTTGAATGGTACTGCCATATGTACTG--TTTCTTGTCAATCAGTAACCAGGA [14551]  
Ami TCATAGCTCTTTGAATGGTACTGCCATATGTACTG--TTTCTTGTCAATCAGTAACAAGGA [16276]  
Asi TCATAGCTCTTTGAATGGTACTGCCATATGTACTG--TTTCTTGTCAATCAGTAACAAGGA [15694]  
Tgu TCATAGCTCTTTGAATGGTACTGCCATAAGCACTG----- [12890]  
Cli TCATAGCTCTTTGAATGGTACTGCCATATGTACCG--GGTTTTGCAATCAGTAACAAGGA [15749]  
Gga TCATAGCTCTTTGAATGGTACTGCCATATGTACTG--GGCTTTGCAGTCAGTAACGAGGA [14297]  
Xtr -----TTTTTTGCTCTCAGTAACAACGA [14546]  
Lch TCATAGCTCTTTGAATGGTACTGCCATATGTACTA----- [16431]  
Dre TCATAGCTCTTTGAATGGTACTGCCATATGTACTG--CCTCTTGTCTCAGTAACAAGGA [14935]

Hsa TTCATCCTTGTGTCCATCATGCAACA--AGGAGAATCTTTGTCACTTAGTGTAATTAATA [15931]  
Mmu TTCATCCTTGTGTCAATCATAACAACA--CGGAGAGTCTTTGTCACTCAGTGTAATTAATA [15672]  
Mdo ----- [14734]

---

---

|     |                                                               |         |
|-----|---------------------------------------------------------------|---------|
| Meu | -----                                                         | [12757] |
| Oan | TTCATCCTTGTGTCTCTGTAAGCAACA--GGGAGGGTCTTTGTCACTGAGTGCAATTAATG | [13684] |
| Aca | -----                                                         | [15718] |
| Pbi | -----                                                         | [15966] |
| Cpi | TTCATCCTTGTGTATAGTAAATAACA--GGGAGAATCTTTGTCACTAAGTACAATTAACA  | [17165] |
| Cmy | TTCATCCTTGTGTATAGTAAATAACA--GGGAGAATCTTTGTCACTAAGTACAATTAACA  | [16911] |
| Psi | TTCAGCCTTGTGTATAATAATAACA--AGGAGAACCTTTGTCACTAAATGCAAATAAAA   | [15460] |
| Asp | TTCATACTCATGTATAATAATAACA--GGGAGAACCTTTGTCACTAAATGCAAATAAAA   | [14609] |
| Ami | TTCATCTCTGTATTGTGTGAAGAACA--GAGAGAGTCTTTGTAACTAAGTGCAAGTAATA  | [16334] |
| Asi | TTCATCTCTGTATTGTGTGAAGAACA--GAGAGAGTCTTTGTAACTAAGTGCAAGTAATA  | [15752] |
| Tgu | -----                                                         | [12890] |
| Cli | TTCATCCTCGTTTCTGGCAAATAACG--GGGAGAATCTTTGTCACTAAGTACAATTAATA  | [15807] |
| Gga | TTCATCCTTGTGTCCAGCAAATAACA--GGGAGAATCTTTGTACTATGTGCAATTAACA   | [14355] |
| Xtr | TTCAGCCTTGTGCATTA-TATATAACC--AAGGGGATCTTTGTCACTAAGTGCAATTAATA | [14603] |
| Lch | -----                                                         | [16431] |
| Dre | TTCATCCTGTTGTGGTACTCAAATCCAACAGGGAATCTCTGTTACTGGGGTTAAGGTTCA  | [14995] |
|     |                                                               |         |
| Hsa | GC-----                                                       | [15933] |
| Mmu | GC-----                                                       | [15674] |
| Mdo | ----TG-ACCTTTATAGAACCTGCATTGTACACACTGTGTGTTTTCA-TTCCCATGCACAG | [14788] |
| Meu | ----TG-ACCTTTATAGAACCTGCATTGTACACACTGTGTGTTTTCA-CTACTATGCACAG | [12811] |
| Oan | GT--TG-ACTGTATAGAACCTGCATTGTACACACTGTGTGTCTCGCTCTCTGCA-CACAG  | [13740] |
| Aca | ----TG-ACCTTATAGGACCTGCATTGTACACACTGTGTGTATGGACTGGAGGTGCACAG  | [15773] |
| Pbi | -----                                                         | [15966] |
| Cpi | GC--TG-ACCTTTATAGAACCTGCATTGTACACACTGTGTGTATTGATTGGACATGCACAG | [17222] |
| Cmy | GC--TG-ACCTTTATAGAACCTGCATTGTACACACTGTGTGTATTGATTGGACATGCACAG | [16968] |
| Psi | GC--TG-ACCTTTATAGAACCTGCATTGTACACACTGTGTGTATTGATGGACATGCACAG  | [15517] |
| Asp | GC--TG-ACCTTTATAGAACCTGCATTGTACACACTGTGTGTATTGATGGACATGCACAG  | [14666] |
| Ami | GC--TG-ACCTTTATAGGACCTGCATTGTACACACTGTGTGTATTGACTGGGCGTGCACAG | [16391] |
| Asi | GC--TG-ACCTTTATAGGACCTGCATTGTACACACTGTGTGTATTGACTGGGCGTGCACAG | [15809] |
| Tgu | ----TG-ACCTTTATAGCACCTGCATTGTACACACTGTGTGTGTGG-CTGGAAATGCACAG | [12944] |
| Cli | GC--TG-ACCTTTATAGCACCTGCATTGTACACACTGTGTGTATTGACTGGAAATGCACAG | [15864] |
| Gga | GC--TG-ACTATATAGCACCTGCATTGTACACACTGTGTGTGTTAACTGGAAATGCACAG  | [14412] |
| Xtr | GC--TG-GCTTTATAGAGCCTGCATTGTACACACTGTGTGTGCACCTCAGACTTGCACAG  | [14660] |
| Lch | ----TG-GCTTTATAGCGCCTGCATTGTACACACTGTGTGTATTGATTTGGTGTACACAG  | [16486] |
| Dre | GA--TGGACTCCTCGGCTCCTGCATTGTACACACTGTGCGGAACACATGGACATGCACAG  | [15053] |
|     |                                                               |         |
| Hsa | -----                                                         | [15933] |
| Mmu | -----                                                         | [15674] |
| Mdo | CGCATACAATGTGGATACTATAAGAGTC-----                             | [14816] |
| Meu | CGCATACAATGTGGATACTATAAGAGTC-----                             | [12839] |
| Oan | CGCGTACAATGTGGATACTATAGAAGTC-----                             | [13768] |
| Aca | CGCATACAATGTGGATGCTATAGAAGTC--GGACTCCATCTTGCCCTCATTGTACATGCT  | [15831] |
| Pbi | -----                                                         | [15966] |
| Cpi | CGCATACAATGTGGATACTGTAGACGTC--TGGCTCTATGTTGTCCTCATTGTACATGCT  | [17280] |
| Cmy | CGCATACAATGTGGATACTGTAGAAGTC--TGGCTCTATGTTGTCCTCATTGTACATGCT  | [17026] |
| Psi | CGCATACAATGTGGATACTGTATAAGTC--TGTCTCTATGCGGTCTCATTGTACATGCT   | [15575] |
| Asp | CGCATACAATGTGGATACTGTAGAAGTC--TGGCTCTATGCGGTCTCATTGTACATGCT   | [14724] |
| Ami | CGCATACAATGTGGATACTGTAGAAGTC--TGGCTCTATGTTGTCCTCATTGTACATGCT  | [16449] |
| Asi | CGCATACAATGTGGATACTGTAGAAGTC--TGGCTCTATGTTGTCCTCATTGTACATGCT  | [15867] |
| Tgu | CGCATACAATGTGGATTCTGTACAAGTC--TGGCTCTATCGTGCCCTCATTGTACATGCT  | [13002] |
| Cli | CGCATACAATGTGGATTCTGTAGAAGTC--TGGCTCTATAGTGTCTCATTGTACATGCT   | [15922] |
| Gga | CGCATACAATGTGGATTCTGTAGAAGTC--TGGCTCTACGTTGTCCTCATTGTACATGCT  | [14470] |
| Xtr | CGCATACAATGTGGATGCTATATGAGTC--TGA CTCTACATTGTCCTCATTGTACATGCT | [14718] |
| Lch | CGCATACAATGTGGATACTGTAAAAGGC--TGGCTCTACATTGTCCTCATTGTACATGCT  | [16544] |
| Dre | CGCATACAATGTGGATGCTGTGGAGCCC--GGGTTCTCCGGTCTCCTCATTGTGCATGCT  | [15111] |

---

---

|     |                                                               |         |
|-----|---------------------------------------------------------------|---------|
| Hsa | -----GTGG                                                     | [15937] |
| Mmu | -----GTGG                                                     | [15678] |
| Mdo | -----                                                         | [14816] |
| Meu | -----                                                         | [12839] |
| Oan | -----                                                         | [13768] |
| Aca | GTGTGTATTTCCTTTGGCGT-ACACAGCGCATGCAATGTGGACAGGAGGGAGGCC--GTGA | [15888] |
| Pbi | -----GTGA                                                     | [15970] |
| Cpi | GTGTGTATTTTTATTACAT-ACACAGCGCATGCAATGTGGACATAAATGGAGATC--GTGG | [17337] |
| Cmy | GTGTGTATTTTTATTACAT-ACACAGCGCATGCAATGTGGACATAAATGGAGATC--GTGG | [17083] |
| Psi | GTGTGTATCTTTATTACAT-ACACAGCGCATGCAATGTGGACATCATGGAGATC--GTGG  | [15632] |
| Asp | GTGTGTATCTTTATTACAT-ACACAGCGCATGCAATGTGGACATCATGGAGATC--GTGG  | [14781] |
| Ami | GTGTGTATATTTATGACGT-ACACAGCGCATGCAATGTGGACAGAATGGAGACC--GTGG  | [16506] |
| Asi | GTGTGTATATTTATGACGT-ACACAGCGCATGCAATGTGGACGTAATGGAGACC--GTGG  | [15924] |
| Tgu | GTGTGAAT--TTGTACAT-ACACAGCGCATGCAATGTGGACATAAATGGAGCTC--GTGG  | [13057] |
| Cli | GTGTGTAT--TTGTACGT-ACACAGCGCATGCAATGTGGACATAAATGGAGCTC--GTGG  | [15977] |
| Gga | GTGTGTAT--TTGCCACGT-ACACAGCGCATGCAATGTGGACATAAATGGAGCTC--GTGG | [14525] |
| Xtr | GTGTGTATCTATTTCTCTT-ACACAGCGCATGCAATGTGGATATATTGGATGTC--GTGG  | [14775] |
| Lch | GTGTGTAT-TCCATTACAT-ACACAGCGCATAACAATGTGGATATCGTCGAGACC--GTGG | [16600] |
| Dre | GTGTGTCTTCAGTCTGGTCCTCACAGCGCCTGCAATGTGGAGGCTAGGGGACTC--GTGG  | [15169] |
|     |                                                               |         |
| Hsa | CAGCTTGGTGGTTCGTATGTGTGACGCCATTTACTTGAACC-TTTAGGAGTGACATCACAT | [15996] |
| Mmu | CAGCTTGGTGGTTCATATGTGTGATGACACTTTCTAAAGTC-TTCCAGAATGACACCACAT | [15737] |
| Mdo | -----                                                         | [14816] |
| Meu | -----                                                         | [12839] |
| Oan | -----                                                         | [13768] |
| Aca | TGGCTTGGTGGTTCGTATGTATGACGTCATTTACTTGTCT-TTTAGGAGTGACATCATAT  | [15947] |
| Pbi | TGGCTTGGTGGTTCGTATGTATGACGTCATTTACTTGTACT-TTTAGGAGTGACATCTTAT | [16029] |
| Cpi | TGGCTTGGTGGTTCGTATGTATGACGTCATTTACTTGGACT-TTTAGGAGTGACATCATAT | [17396] |
| Cmy | TGGCTTGGTGGTTCGTATGTATGACGTCATTTACTTGGACT-TATAGGAGTGACATCATAT | [17142] |
| Psi | TGGCTTGGTGGTTCGTATGCATGACGTCATTTACTTGGACT-TTTAGGAGTGACATCATAT | [15691] |
| Asp | TGGCTTGGTGGTTCGTATGCATGACGTCATTTACTTGGACT-TTTAGGAGTGACATCATAT | [14840] |
| Ami | TGGCTTGGTGGTTCGTATGTATGACGTCATTTACTTGGACT-TTTAGGAGTGACATCATAT | [16565] |
| Asi | TGGCTTGGTGGTTCGTATGTATGACGTCATTTACTTGGACT-TTTAGGAGTGACATCATAT | [15983] |
| Tgu | TGGCTTGGTGGTTCGTATGTATGACGTCATTTACTTGGACT-TTTAGGAGTGACATCATAT | [13116] |
| Cli | TGGCTTGGTGGTTCGTATGTATGACGTCATTTACTTGGACT-TTTAGGAGTGACATCATAT | [16036] |
| Gga | TGGCTTGGTGGTTCGTATGTATGACGTCATTTACTTGGACT-TTTAGGAGTGACATCATAT | [14584] |
| Xtr | TGGCTTAGTGGTTCGTATGTATGACGTCATTTACTGGATTT-TTTAGGAGTGACATCATAT | [14834] |
| Lch | TGGCTTGGTGGTTCGTATGTATGACGTCATTTACTTGGACT-TTTAGGAGTGACATCATAT | [16659] |
| Dre | TGGCTTGGTGGTTCGTATGTATGACGTCATTTACTTCAAAG-TTT-GGAGTGACATCATAT | [15227] |
|     |                                                               |         |
| Hsa | ATACGGCAGCT-AAACTGCTAC--GCGGGCGGCTGTTAAGACTTGCAGTGATGTTTAACT  | [16053] |
| Mmu | ATATGGCAGCT-AAACTGTTAC--GTGGGCAGCTGTTAAGACTTGCAGTGATGTTTAGCT  | [15794] |
| Mdo | -----                                                         | [14816] |
| Meu | -----                                                         | [12839] |
| Oan | -----GGGGCAGCGGTTAAGACTTGTAGTGATGTTTAGCT                      | [13804] |
| Aca | GTACGGCTGCT-AAACTGCCAC--GGGGGAGGCAGTTAAGACTTGCAGTGATGTTTAGAA  | [16004] |
| Pbi | GTACGGCTGCT-AAACTGCCAC--GGGAGAGGCAGTTAAGACTTGCAGTGATGTTTAGAT  | [16086] |
| Cpi | GTACGGCTGCT-AAACTGCTGC--GAGAGCGGCAGTTAAGACTTGCAGTGATGTTTAGAT  | [17453] |
| Cmy | GTACGGCTGCT-AAACTGCTGC--GAGAGCGGCAGTTAAGACTTGCAGTGATGTTTAGAT  | [17199] |
| Psi | GTACGGCTGCT-AAACTGCTGC--GAGAGCGGCGGTTAAGACTTGCAGTGATGTTTAGCT  | [15748] |
| Asp | GTACGGCTGCT-AAACTGCTGC--GAGAGCGGCAGTTAAGACTTGCAGTGATGTTTAGAT  | [14897] |
| Ami | GTACGGCTGCT-AAACTGCTGC--GAGAGCGGCAGTTAAGACTTGCAGTGATGTTTAGAT  | [16622] |
| Asi | GTACGGCTGCT-AAACTGCTGC--GAGAGCGGCAGTTAAGACTTGCAGTGATGTTTAGAT  | [16040] |
| Tgu | GTACGGCTGCT-AAACTGCTGC--GAGAGCGGCAGTTAAGACTTGTAGTGATGTTTAGAT  | [13173] |
| Cli | GTACGGCTGCT-AAACTGCTGC--GAGAGCGGCAGTTAAGACTTGTAGTGATGTTTAGAT  | [16093] |
| Gga | GTACGGCTGCT-AAACTGCTGC--GGGAGCGGCAGTTAAGACTTGTAGTGATGTTTAGAT  | [14641] |
| Xtr | GTACGGCTGCT-AAACTGCTGC--GAGCGAGGCAGTTAAGACTTGCAGTGATGTTTAGTT  | [14891] |

```
Lch GTACGGCTGCT-AAACTGCTAC--GAGAGAGGCAGTTAAGACTTGCAGTGATGTTTAGAA [16716]
Dre GTACGGCTGCT-AAACTGCTAC--GAGGGAGGCAGTTAAGACTTGCAGTGATGTTTAGAG [15284]

Hsa CCTCTCC--ACGTGAACATCACAGCAAGTCTGTGCTG-C TTCCCGTCC--TGACCCTGGA [16108]
Mmu CCTCTGC--ATGTGAACATCACAGCAAGTCTGTGCTG-CTGCCTGCC----- [15839]
Mdo -----TGACCCTGGA [14826]
Meu -----TGACCCTGGA [12849]
Oan CATCTCC--ACGTGAACATCACTGCAAGTCTGTGCTG-C TTCTCCCT----- [13849]
Aca AATTTACT-ACATGAACATCACTTTAAGTCTGTGCTA-C TTCTTCTCCT----- [16050]
Pbi AATTTATT-ACATAAACATCACTTTAAGTCTGTGCTA-T TTCTCTCCT--TCACCTGGGA [16142]
Cpi AATGTATT-ACATGAACATCACTTTAAGTCTGTGCTA-C CTCTCTCCT--TGACCTTGGA [17509]
Cmy AATGTATT-ACATGAACATCACTTTAAGTCTGTGCTA-C CTCTCTCCT--TGACCTTGGA [17255]
Psi AATGTATT-ACATGAACATCACGGTGAGTCTGTGCTA-C CTCTCTCCT--TAATCTTAGA [15804]
Asp AATGTATT-ACATGAACATCACTTTAAGTCTGTGCTA-C TTCTCTCCT--TAATCTTAGA [14953]
Ami AATGTATT-ACATGAACATCACTTTAAGTCTGTGCTA-C TTCTCTCCT--TAACCTTGGA [16678]
Asi AATGTATT-ACATGAACATCACTTTAAGTCTGTGCTA-C TTCTCTCCT--TAACCTTGGA [16096]
Tgu AATTAATT-ACATGAACATCACTTTAAGTCTGTGCTA-C TTCTCTCCT----- [13219]
Cli AATGTATT-ACATGAACATCACTTTAAGTCTGTGCTA-C TTCTCTCCT--TGACCTTGGA [16149]
Gga AATGTATT-ACATGAACATCACTTTAAGTCTGTGCTA-C TTCTCTCCT----- [14687]
Xtr AAAATCTTTTCATGAACATCACTTTAAGTCTGTACTG-C TTCTCCCTC--TGACCTTGGA [14948]
Lch AATTCAA-TCATGAACATCACTTTAAGTCTGTGCTA-C TTCTTTTCT--AGGCCTAGGA [16772]
Dre AAATGTC--ACATGAACATCACTTTAAGTCTGTGCTGGCTCCTGTTCT----- [15330]

Hsa AATCCAGAGTGGGTGGGGCCAGTCTGACCGTTT-CTAGGCGACCCACTCTTGGTTTCCAG [16167]
Mmu ----- [15839]
Mdo AATCCAGAAGGGGTGGAGCCTGTTGGACAGTTT-CTAGGCGACCCATTCTTGGTTTCAAG [14885]
Meu AATCCAGAAGGGGTGGAGCCTGTTGGACAGTTT-CTAGGCGACCCATTCTTGGTTTCAAG [12908]
Oan ----- [13849]
Aca ----- [16050]
Pbi AATCAAGAATGGGTGGGGCCTGTGAATATGAGA-GGAGGCGACCCACTCTTGGTTTCCAA [16201]
Cpi AATCAAGAATGGGTGGAGCCTGTTGAATTAATT-CTAGGCGACCCATACTTGGTTTCAAG [17568]
Cmy AATCAAGAATGGGTGGAGCCTGTTGAATTAATT-CTAGGCGACCCATACTTGGTTTCAAG [17314]
Psi AATCAAGAATGGGTGGAGCCTGTTAAATTAATT--TTAGGCGACCCATACTTGGTTTCAAG [15862]
Asp AATCAAGAATGGGTGTAGCCTGTTAAATTAATT--TTAGGCGACCCATACTTGGTTTCAAG [15011]
Ami AATCAAGGATGGGTGAAGCCTGTTGGAATAACT-CTAGGCGACCCATACTTGGTTTCAAG [16737]
Asi AATCAAGGATGGGTGAAGCCTGTTGGAATAACT-CTAGGCGACCCATACTTGGTTTCAAG [16155]
Tgu ----- [13219]
Cli AATCAAGTGTAGGTGGAGCCTGTGGCAGCGAT--CAAGGCGACCCACACTTGGTTTCAAG [16207]
Gga ----- [14687]
Xtr AACCAAGAGTGGGTGGGCCTGTTAGATCAC---ATAGGCGACCCATACTTGGTTTCAAG [15005]
Lch GATCAAGTGTGGGTGAAGCCTGTAGAGATTGTTGCTAGGCGACCCATACTTGGTTTCAAG [16832]
Dre ----- [15330]

Hsa GGTTCGCCCTG--TGGCCCATGAAATCAAGCGTGGGTGAGACCTGGTGCAGA-ACGGAAG [16224]
Mmu -----TGGCCCATGAAATCAAGCTTGGGTGAGACCTGGTGCAGA-ACAGGAAG [15886]
Mdo GGTTCGCCATG--TGGCCCCAGAAATCAAGGATGGGTGAGACCTCGTGTGCAAACCTGAAAG [14943]
Meu GGTTCGCCATG--TGGCCCCAGAAATCAAGGATGGGTGAGACCTCGTGTGCAAACCTGAAAG [12966]
Oan -----TGGCCCCAGAAATCAAGGATGGGTGAGACCTCTTGACA-AGTGGAAG [13896]
Aca -----TGGCTCCAGAAATCAAGGTGGGTGAGACCTCGTGAACAGACTGGAAG [16098]
Pbi GGTCAGCAGG--TGGCTCCAGAAATCAAGGCTGGGTGAGACCTCGTGAAGAAACCTAGAAG [16259]
Cpi GGTCAGCAGG--TGGCTCCAGAAATCAAGGGTGGGTGAGACCTCGTAAGAAAACGTGAAG [17626]
Cmy GGTCAGGAGG--TGGCTCCAGAAATCAAGGGTGGGTGAGACCTCGTAAGAAAACGTGAAG [17372]
Psi GGTAAACAGG--TGGCTCCAGAAATCAAGAATGGGTGAGACCTCGTAAGAAAACATGAAG [15920]
Asp GGTAAACAGG--TGGCTCCAGAAATCAAGAGTGGGTGAGACCTCGTAAGAAAACATGAAG [15069]
Ami GGTCAGCAGG--TGGCTCCAGAAATCAAGGGTGGGTGAGACCTCGTAAGAACAGTTGAAG [16795]
Asi GGTCAGCAGG--TGGCTCCAGAAATCAAGGGTGGGTGAGACCTCGTAAGAACAGTTGAAG [16213]
Tgu -----TGGCTCCAGAAATCAAGGGTGGGTGAGACCTGGTGCAGAACTCTAAG [13267]
```

---

---

|     |                                                                 |         |
|-----|-----------------------------------------------------------------|---------|
| Cli | GGTCCGCAGG--TGGCTCCAGAAATCAAGGGTGGGTAAGACCTCGTCAGCAAAGTTTAAAG   | [16265] |
| Gga | -----TGGCTCCAGAAATCAAGGGTGGGTAAGACCTTGTAGGATAACTGGCAG           | [14735] |
| Xtr | GGTTAGCAGG--TGACCTTAGAAATCAAGCTTGGGTTAGACCTGGTTCTTATACTGAG      | [15063] |
| Lch | GGCCGGTGGG--TTGCCCCAGAAATCAAGGATGGGTGAGACCTCGTAATGAACGATGAAG    | [16890] |
| Dre | -----                                                           | [15330] |
|     |                                                                 |         |
| Hsa | GCGACCCATACTTGGTTTTCAGAGGCTGTGAGA-----                          | [16256] |
| Mmu | GCGACCCATACTTGGTTTTCAGTGGCTGCAAGA-----                          | [15918] |
| Mdo | GCGACCCATACTTGGTTTTCAGGGGCTTCGAGA-----                          | [14975] |
| Meu | GCGACCCATACTTGGTTTTCAGGGGCTTCGAGA-----                          | [12998] |
| Oan | GCGACCCATACTTGGTTTTCAGGGGCTTCCGGA-----                          | [13928] |
| Aca | GCGACCCATACTTGGTTTTCAGGAGCTTCGAGG--GGGCGCTCGTCAGGAATTCCGCTAGT   | [16156] |
| Pbi | GCGACCCATACTTGGTTTTCAGGAGCTGTGAGG-----                          | [16291] |
| Cpi | GCGACCCATACTTGGTTTTCAGGGGCTGTGAGG--GGGCGTTCACCAGGAATTCCGCTAGT   | [17684] |
| Cmy | GCGACCCATACTTGGTTTTCAGGGGCTGTGAGG-----                          | [17404] |
| Psi | GCGACCCATACTTGGTTTTCAGGGGCTGTGAGG-----                          | [15952] |
| Asp | GCGACCCATACTTGGTTTTCAGGGGCTGTGAGG-----                          | [15101] |
| Ami | GCGACCCATACTTGGTTTTCAGGGGCTTTGAGG-----                          | [16827] |
| Asi | GCGACCCATACTTGGTTTTCAGGGGCTTTGAGG-----                          | [16245] |
| Tgu | GCGACCCATACTTGGTTTTCAGGGGCTGTGGGC-----                          | [13299] |
| Cli | GCGACCCATACTTGGTTTTCAGGGGCTGTGTGG--GGCCGTGCGGCCGGAATTCCGCTAGT   | [16323] |
| Gga | GCGACCCATACTTGGTTTTCAGGGGCTGTGTGG-----                          | [14767] |
| Xtr | GCGACCCATACTTGGTTTTCTGAGGCTGAAGTG--GGGTGCTTGTTCAGGAATTCCGCTAGT  | [15121] |
| Lch | GCGACCCATTCTTGGTTTTCAGGGACCTTGGTG-----                          | [16922] |
| Dre | -----CTACTAGCAGAAGGAATTCCGCTAGT                                 | [15356] |
|     |                                                                 |         |
| Hsa | -----                                                           | [16256] |
| Mmu | -----                                                           | [15918] |
| Mdo | -----                                                           | [14975] |
| Meu | -----                                                           | [12998] |
| Oan | -----                                                           | [13928] |
| Aca | TCTGAACTATTTTACAGTTAGAAAAA----GTTCACTACTAGCAGAACTCGGCCGCGCGC    | [16211] |
| Pbi | -----                                                           | [16291] |
| Cpi | TCTGAACTATTTTACACTTGAAAAA----GTTCACTACTAGCAGAACTCGGGTGC         | [17739] |
| Cmy | -----                                                           | [17404] |
| Psi | -----                                                           | [15952] |
| Asp | -----                                                           | [15101] |
| Ami | -----                                                           | [16827] |
| Asi | -----                                                           | [16245] |
| Tgu | -----                                                           | [13299] |
| Cli | TCTGAACTTTTTTCTGAAAAA-----GCTCACTACTGGCAGAACTCGGCCGCGCGC        | [16381] |
| Gga | -----                                                           | [14767] |
| Xtr | TCTGAACTATT--CCATGTTAGTAAGTAAAAGTTCACTACTAGCAGAACTCGGCCACGTAC   | [15180] |
| Lch | -----                                                           | [16922] |
| Dre | TCTGAACTATT--CGTGATTGGCAAAA----GTTCACTACTAGCAGAACTCGGATATACAA   | [15411] |
|     |                                                                 |         |
| Hsa | -----                                                           | [16256] |
| Mmu | -----                                                           | [15918] |
| Mdo | -----                                                           | [14975] |
| Meu | -----                                                           | [12998] |
| Oan | -----                                                           | [13928] |
| Aca | --CTACTCTGCTGTTGTTTTTTTAGGTTTTGATTTTTTATGCCATCCTCATGCGAAAAATCA  | [16269] |
| Pbi | --CTACTCTGCTGTTGTTTTTTTAGGTTTTGATTTTTTATGCCATGCTCATGTGAAAAATCA  | [16349] |
| Cpi | --CTACTCTGCTGTTATTTTTTTTAGGTTTTGATTTTTTATTACATCTTCATGCGAAAAATCA | [17797] |
| Cmy | --CTACTCTGCTGTTATTTTTTTTAGGTTTTGATTTTTTATTACATCTTCATGCGAAAAATCA | [17462] |
| Psi | --CTACTCTGCTGTTATTTTTTTTAGGTTTTGATTTTTTATTACATCTTCATGAGAAAAATCA | [16010] |
| Asp | --CTACTCTGCTGTTATTTTTTTTAGGTTTTGATTTTTTATTACATCTTCATGCGAAAAATCA | [15159] |

---

---

|     |                                                                 |         |
|-----|-----------------------------------------------------------------|---------|
| Ami | --CTACTCTGCTGTTATTTTTTTTAGGTTTTGATTTTTTATTGCATCTTCATGCGAAAATCA  | [16885] |
| Asi | --CTACTCTGCTGTTATTTTTTTTAGGTTTTGATTTTTTATTACATCTTCATGCGAAAATCA  | [16303] |
| Tgu | -----                                                           | [13299] |
| Cli | --TGGTTTTGGGTTGAGTTTTTTTTAGGTTTTGATTTTTTATTACATCTTTGTACAAAAATCA | [16439] |
| Gga | -----                                                           | [14767] |
| Xtr | -----                                                           | [15180] |
| Lch | --CTGCTCTGCTGTAGTTTTTTTTAGGTTTTGATTTTTTATTATGTCTGTGCAGGAAAATCA  | [16980] |
| Dre | --CTGCTGTGCTGTTGTTTTTTTTAGGTTTTGATTTTTTGTGAAATGTCGATGAGAAAATCA  | [15469] |
|     |                                                                 |         |
| Hsa | -----TTAGTGGTACTATAACCTCAGTTTTATCA                              | [16284] |
| Mmu | -----TCTGTGGTACTATAACCTCAGTTTTATCA                              | [15946] |
| Mdo | -----TCTGTGGTACAATACCTCAGTCTTATCA                               | [15003] |
| Meu | -----                                                           | [12998] |
| Oan | -----TTAGTGGTACAATACCTCAGTCTTATCA                               | [13956] |
| Aca | AAACCTAAAGAAAATGCTGCAAAGATAGAT--TTAGTGGTACAATACCTCAGCCTTATCA    | [16327] |
| Pbi | AAACCTAAAGAAAATGCTGCAAAGATAGAT--TTAGTGGTACAATACCTCAGCCTTATCA    | [16407] |
| Cpi | AAACCTAAAGAAAATGCTGCAAAGATAGAT--TTAGTGGTACAATACCTCAGTCTTATCA    | [17855] |
| Cmy | AAACCTAAAGAAAATGCTGCAAAGATAGAT--TTAGTGGTACAATACCTCAGGCTTATCA    | [17520] |
| Psi | AAACCTAAAGAAAATGCTGCAAAGATAGAT--TCAATGGTACAATACCTCAGTCTTATCA    | [16068] |
| Asp | AAACCTAAAGAAAATGCTGCAAAGATAGAT--TAAATGGTACAATACCTCAATCTTATCA    | [15217] |
| Ami | AAACCTAAAGAAAATGCTGCAAAGATAGAT--TTAGTGGTACAATACCTCAGTCTTTTCA    | [16943] |
| Asi | AAACCTAAAGAAAATGCTGCAAAGATAGAT--TTAGTGGTACAATACCTCAGTCTTTTCA    | [16361] |
| Tgu | -----TAAGTGGTACAATATCTCAATTTTTTCCA                              | [13327] |
| Cli | AAACGTAAAGAAAATGCTGCAAAGATAGAT--TTAGTGGTACAATACCTCAGTCTTTTTCG   | [16497] |
| Gga | -----CTAGTGATAACAATAACTCAGTATTTTCT                              | [14795] |
| Xtr | -----                                                           | [15180] |
| Lch | AAACCTAAAGAAAATGCTGCAAAGATAGAC--TTAGCGGTACAATACCTCAGTCTTTTCA    | [17038] |
| Dre | AAACCTAAAGAAAATACTGCGCAGATAGAT-----                             | [15499] |
|     |                                                                 |         |
| Hsa | GGTGTTC--TTAAAA--TCACCTGGAAACACTGAGGTTGTGTCTCACTGAAC--TGAGCAG   | [16339] |
| Mmu | GGTGTTCATTTAAAA--TCACCTGAAAATACTGAGGCTATGTTTCACTGAGC--TGAACAG   | [16002] |
| Mdo | GGTGTTAATTTAAAA--TCACCTGGAAATGCTGAGGTTGCGTTTCACTGAAC--CGAAGAG   | [15059] |
| Meu | -----CAAAGAG                                                    | [13005] |
| Oan | GGTGTTCCTTTCAAT--TCACCTGGCAATACTGAGGTTGTGTCTCACTGAAC-----       | [14005] |
| Aca | GGTGTGTATATAT--TCACCTGGAAGTACTGAGGTTGAGTTTCACTGAAC--TGAACAG     | [16383] |
| Pbi | GGTGTATATATATATATTCACCTGGAAGTCTGAGGTTGAGTTTCACTGAAC--TGAACAG    | [16465] |
| Cpi | GGTGTTCATAAAAT--TCACCTGCAAAAACACTGAGGTTGAGTTTCACTGAAC--TGAACAG  | [17911] |
| Cmy | GGTGTTCGTAAAT--TCACCTGGAAAAACTGAGGTTGAGTTTCACTGAAC--TGAACAG     | [17576] |
| Psi | GGTGTTCATAAAAT--TCACCTTGAAAAACTGAGGTTGAGTTTCACTGAAC--TGAACAG    | [16124] |
| Asp | GGTGTTCATAAAAT--TCACCTTGAAAAACGAGGTTGAGTTTCACTGAAC--TGAACAG     | [15273] |
| Ami | GGTGTTCATAAAAA--TCACCTGGAAATATTGAGGTTGAGTTTCACTGAAC--TGAACAG    | [16999] |
| Asi | GGTGTTCATAAAAA--TCACCTGGAAATATTGAGGTTGAGTTTCACTGAAC--TGAACAG    | [16417] |
| Tgu | GATGTTCATAAAAT--TTGCCTGGAAATACCTAGGTGAAGTTTCACTGAAC-----        | [13376] |
| Cli | GATGTTCATAAAAT--TCACCTGGAAATACTGAGGTTGCGTTTCACTGAAC--CGAACAG    | [16553] |
| Gga | GTTGGACTAGAAAT--TCACCTGGAAATACCAAGGTTGAGTTGCACTGAAC--TGAACAG    | [14851] |
| Xtr | -----AGAAGAG                                                    | [15187] |
| Lch | GGTGTTCATACAT--TCACCTGTAAGTACTGAGGTTATGTTCCACTGAAC--TCAACAG     | [17094] |
| Dre | -----TAAAGCA                                                    | [15506] |
|     |                                                                 |         |
| Hsa | TCTCCACCACCTCCCCTGCAAACGTCCAGTGGTGCAGAGGTAATGGACGTTGGCTCTGGT    | [16399] |
| Mmu | TCTCCACCACCTCCCCTGCAAACGTCCAGTGCAGAGGTAATGGACGTTGGCTCTGGT       | [16062] |
| Mdo | CCTCCACCACCTCCCCTGCAAACGTCCAGTGCAGAGGTAATGGACGTTGGCTCTGGT       | [15119] |
| Meu | CCTCCACCAGCTCCCCTGCAAAGTCCAGTGCAGAGGTAATGGATGTTGGCTCTGGT        | [13065] |
| Oan | -----                                                           | [14005] |
| Aca | CCTCCACCACCTCCCCTGCAAACGTCCAGTGCAGAGGTAATGGACGTTGGCTCTGGT       | [16443] |
| Pbi | CCTCCACCACCTCCCCTGCAAACGTCCAGTGCAGAGGTAATGGACGTTGGCTCTGGT       | [16525] |
| Cpi | CCTCCACCACCTCCCCTGCAAACGTCCAGTGCAGAGGTAATGGACGTTGGCTCTGGT       | [17971] |

```
Cmy CCTCCACCACCTCCCCTGCAAACGTCCAGTGACGCAGAGGTAATGGACGTTGGCTCTGGT [17636]
Psi CCTCCACCACCTCCCCTGCAAACGTCCAGTGATGCAGAGGTAATGGACGTTGGCTCTGGT [16184]
Asp CCTCCACCACCTCCCCTGCAAACGTCCAGTGACGCAGAGGTAATGGACGTTGGCTCTGGT [15333]
Ami CCTCCACCACCTCCCCTGCAAACGTCCAGTGACGCAGAGGTAATGGACGTTGGCTCTGGT [17059]
Asi CCTCCACCACCTCCCCTGCAAACGTCCAGTGACGCAGAGGTAATGGACGTTGGCTCTGGT [16477]
Tgu ----- [13376]
Cli CCTCCACCACCTCCCCTGCAAACGTCCAGTGACGCAGAGGTAATGGACGTTGGCTCTGGT [16613]
Gga CCTCCACCACCTCCCCTGCAAACGTCCAGTGACGCAGAGGTAATGGACGTTGGCTCTGGT [14911]
Xtr CCTCCACCACCTCCCCTGCAAACGTCCAGTGACGCAGAGGTAATGGACGTTGGCTCTGGT [15247]
Lch CCTCCACCACCTCCCCTGCAAACGTCCAGTGACGCAGAGCTAATGGACGTTGGCTCCGGT [17154]
Dre CCTCCACCACCTCCCCTGCAAACGTCCAGTGACGCAGAGGAAATGGACGTTAGCTCTGGT [15566]

Hsa GGTGATGGACAGTCCG----- [16415]
Mmu GGTGATGGACAGTCCG----- [16078]
Mdo GGTGCTGGACAGTCAG--GGTCTGGTTGTAGGGGTACAGTGATCAGGTTATGATGGATTT [15177]
Meu GGTGTTGGACAGTCAG----- [13081]
Oan -----AATCTGGTTGTAGGGGTACAGTGATCAGGTTACGATGGATTT [14047]
Aca GGTGATGGACAGTCAG--CATCGGACTGTAGGGGTACAGTGATCAGGTTACGATGGATTT [16501]
Pbi GGTGATGGACAGTCAG--CATCTGGTTGTAGGGGTACAGTGATCAGGTTACGACGGATTT [16583]
Cpi GGTGATGGACAGTCAG--AGTCTGGTTGTAGGGGATACAGTGATCAGGTTACGAGGGATTT [18029]
Cmy GGTGATGGACAGTCAG--AGTCTGGTTGTAGGGGATACAGTGATCAGGTTACGAGGGATTT [17694]
Psi GGTGATGGACAGTCAG--AGTCTGGTTGTAGGGGATACAGTGATCAGGTTACGAGGGATTT [16242]
Asp GGTGATGGACAGTCAG--AGTCTGGTTGTAGGGGATACAGTGATCAGGTTACGAGGGATTT [15391]
Ami GGTGATGGACAGTCAG--GGTCTGGTTGTAGAGATACAGTGATCAGGTTACGATG-ATTT [17116]
Asi GGTGATGGACAGTCAG--GGTCTGGTTGTAGAGATACAGTGATCAGGTTACGATG-ATTT [16534]
Tgu -----GGTCTGGTTGTAGAGATACAGTGATCAGGTTACGATGGATTT [13418]
Cli GGTGATGGACAGTCAG--GGTCTGGTTGTAGAGATACAGTGATCAGGTTACGATGGATTT [16671]
Gga GGTGATGGACAGTCAG--GGTCTGGTTGTAGAGATACAGTGATCAGGTTACGATGGATTT [14969]
Xtr GGTGATGGACAGTCAC--AATCTAGTTGTAGGGGTACAGTGATCAGGTTACGATGGATTT [15305]
Lch GGTGATGGACAATTTG--AATCTAGTTGTAGGGGTACAGTGACCAGGTTACGATGGATTT [17212]
Dre GGTGATGGACACCAAC----- [15582]

Hsa ----- [16415]
Mmu ----- [16078]
Mdo CTCAAGTAAGCACCTCGTAGCTTGGTCACGATATCCATATGACTCAGAT--AATGGAAGG [15235]
Meu ----- [13081]
Oan CTCAAGTAACAACCTCGTAGCTCGGTCACGATATCCATATGACTCGAAG--AGTGGGGGG [14105]
Aca CTCTAGTAACAGCCTCGTAGCTTGTATCACCATCTCCCTATGATTCAGAT--GGTGAGGAG [16559]
Pbi CTCTAGTAACAACCCCGTAGCTTGTATCACCATCTCCCTATGACTCAGAT--GCTGAGGAG [16641]
Cpi CTCAAGTAACAACCTCGTAGCTCGGTCACGATATCCCTATGACTTAGAT--AGTGAGGGG [18087]
Cmy CTCAAGTAACAACCTCATAGCTCGATCAGATATCCCTATGACTTAGAT--AGTGAGGGG [17752]
Psi CTCAAGTAACAACCTCGAAGCTCGATCAGATATCCCTATGACTTAGGT--AATGAGGGG [16300]
Asp CTCAAGTAACAACCTCGTAGCTCGATCAGATATCCCTATGACTTAGAT--AATGAGGGG [15449]
Ami CTCAAGTAACAACCTCGTAGCTTGTATCACAATATCCCTATGACTTAGAT--AGTGAGGGG [17174]
Asi CTCAAGTAACAACCTCGTAGCTTGTATCAGATATCCCTATGACTTAGAT--AGTGAGGGG [16592]
Tgu CTCAAGTAACAACCTCGTAGCTTGTATCAGATATCCCTATGACTTGAGA--AGTGAGGGG [13476]
Cli CTCAAGTAACAACCTCGTAGCTTGTATCAGATATCCCTATGACTTGAGA--AGCGAGAGG [16729]
Gga CTCAAGTAACAACCTCGTAGCTTGTATCAGATATCCCTATGACTTGAGA--AGCGAGGGG [15027]
Xtr CTGAAGTAACGGCCTCGTAACTTGGTCACCATATCCATATGACTCAGAT----- [15354]
Lch TACAAGAAAC---CTCGTAGCTTGGTCACGATATCCATATGACTTGGAT--ACTGAGTGG [17267]
Dre -----ATGAGCAGT [15591]

Hsa ----- [16415]
Mmu ----- [16078]
Mdo TGCATCTAGGACTGTCTAACCTGAGAATGGTGAA-TCTCAGGGTCAATCTCAGGTTTGTC [15294]
Meu ----- [13081]
Oan CGTGTCTAGGACTGTCTAACCTGAGAATGGTGATGTGTGAGGGTCAATCTCAGGTTTCGTC [14165]
```



```
Aca TTTTTTGAGGACTGTCTAACCTGAGAATGGTGAATCATGAAGGTCAATCTCAGGTCCGTC [16619]
Pbi TGTTTCAAGGACTGTCTAACCTGAGAATGGTGAACAAAATGCTCAATCTCAGGTCCGTC [16701]
Cpi TGTTTCGAGGACTGTCTAACCTGAGAATGGTGAACATGAAGGTCAATCTCAGGTTCGTC [18147]
Cmy TGTTTCGAGGACTGTCTAACCTGAGAATGGTGAACATGAAGGTCAATCTCAGGTTCGTC [17812]
Psi TGTTTCGAGGACTGTCTAACCTGAGAATGGTGAACATGAAGGTCAATCTCAGGTTCGTC [16360]
Asp TGTTTCGAGGACTGTCTAACCTGAGAATGGTGAACATGAAGGTCAATCTCAGGTTCGTC [15509]
Ami CGTCCCCAGGACTGTCTAACCTGAGAATGGTGAACACGAGGGTCAATCTCAGGTTCGTC [17234]
Asi CGTCCCCAGGACTGTCTAACCTGAGAATGGTGAACACGAGGGTCAATCTCAGGTTCGTC [16652]
Tgu CACCTCGAGGACTGTCTAACCTGAGAATGGTGAACATCAAGGTCAATCTCAGGTTCGTC [13536]
Cli CACCTCGAGGACTGTCTAACCTGAGAATGGTGAACATGTAAGGGTCAATCTCAGGTTCGTC [16789]
Gga CACCTCGAGGACTGTCTAACCTGAGAATGGTGAACATGAGGGTCAATCTCAGGTTCGTC [15087]
Xtr ----- [15354]
Lch TGTTTGGAGGACTGTCTAACCTGAGAATGGTGAA-CTCGAAGGTCAATCTCAGGTTCGTC [17326]
Dre GCTTTCAGGACTGTCCAACCTGAGAATGCTTGA--GTTTTGGTCAATCTCAGGTTCGTC [15649]

Hsa ----- [16415]
Mmu ----- [16078]
Mdo AGCCCATGAGGTGCCTTCC----- [15313]
Meu ----- [13081]
Oan AGCCCATGAAACGCCTTCT----- [14184]
Aca AGCCCACGAGAAGCTGCCT--CTGTGGGCTTGACATCATCCTACTTGAGATGTAATGTAA [16677]
Pbi AGCCCATGAGACGTTCCCTT--CTGTGGGTTTGACATCATCATACTTGGGATGTGCTAACA [16759]
Cpi AGCCCATGAGACGCCTTCT--CTATGGGTTTGACATCATCATACTTGGAGATGTA-TGACA [18204]
Cmy AGCCCATGAGACGCCTTCT--CTATGGGTTTGACATCATCATACTTGGAGATGTA-TGACA [17869]
Psi AGCCCATGAGACACTTTCT--CTATGGGCTTGACATCATCATACTTGGAGATGTA-TGACA [16417]
Asp AGCCCATGAGACACTTTCT--CTATGGGCTTGACATCATCATACTTGGAGATGTA-TGACA [15566]
Ami AGCCCATGAGACGCTCTCT--CTATGGGTTTGACATCATCATACTTGGGATGTA-TGTCA [17291]
Asi AGCCCATGAGACGCTCTCT--CTATGGGTTTGACATCATCATACTTGGGATGTA-TGTCA [16709]
Tgu AGCCCATGAGATGCCTTCT--CGATGGGCTTGACATCATCATACTTGGGATGTA-TGACA [13593]
Cli AGCCCATGAGACGCCTTCT--CTATGGGTTTGACATCATCATACTTGGGATGTA-TGACA [16846]
Gga AGCCCATGAGATGCCTTCT--CTATGGGTTTGACATCATCATACTTGGGATGTA-TGACA [15144]
Xtr -----CTCTGGGTTTGACATCATCATACTTGGGATGTA-TGACA [15392]
Lch AGCCCATAAAACGCTTCTT----- [17345]
Dre AGCCCATGAAAAACTGTCT----- [15668]

Hsa ----- [16415]
Mmu ----- [16078]
Mdo ----- [15313]
Meu ----- [13081]
Oan ----- [14184]
Aca TGCAAAGTCCCAAGTAGGTTGATGTCTGGCCCAAGATGG--ACCTCCCTGTGCTGGGCTT [16735]
Pbi TT-AAAACCCCAAGCAGGTTGATGTCTGGCCCAAGATGG--ACCTACTTGTGCTGGGCTT [16816]
Cpi C--AAAGTCCCAAGCAGGCTGATGTGTCAGGCCCAAGATGG--CCCTCTGTGTGTCGGGCTT [18260]
Cmy C--AAAGTCCCAAGCAGGCTGATGTGTCAGGCCCAAGATGG--CCCTCTGTGTGTCAGGCTT [17925]
Psi C--AAAGTCCCAAGCAGGCTGATGTGTCAGGTCCAAAATGG----- [16454]
Asp C--AAAGTCCCAAGCAGGCTGATGTGTCAGGCCCAAGATGG----- [15603]
Ami C--AAAGTCCCAAGAAGGCTGATGTGTCAGGCCCAAGATTG--CCCGCCGCTCCTGGGCTT [17347]
Asi C--AAAGTCCCAAGAAGGCTGATGTGTCAGGCCCAAGATTG--CCCGCCGCTCCTGGGCTT [16765]
Tgu C--GAAGTCCCAAGCAGGCTGATGTGTCAGGCCCAAGATGC--CCCGCTGTCTCCAGGGCTT [13649]
Cli C--AAAGTCCCAAGCAGGCTGATGTGTCAGGCCCAAGATGG--CACACTGTCTCCGGGGCTT [16902]
Gga C--AAAGTCCCAAGCAGGCTGATGTGTCAGGCCCAAGATGG--CCTGCTGTGTCCCGGGCTT [15200]
Xtr C--AAAGTCCCAAGCAAGCTGATGTTAGGCCCAAGATGG--CCTCCTGGGTCTGGGCTT [15448]
Lch -----TCTCTTGGGTTCTGGGCTT [17364]
Dre -----TGCTTGTATCCGAGGCTT [15687]

Hsa ----- [16415]
Mmu ----- [16078]
```

---

---

|     |                                                               |         |
|-----|---------------------------------------------------------------|---------|
| Mdo | -----                                                         | [15313] |
| Meu | -----                                                         | [13081] |
| Oan | -----                                                         | [14184] |
| Aca | GTTTTTCAGTTGCCTGCGG-CTGATTAATAGGGACTCAGGCAGCTAAAGCAAGTCTGATAC | [16794] |
| Pbi | GTTTTTCAGTTGCCTGCGG-CTGGCTAATATG-ACTCAGGCAGCTAAAGCAAGTCTGGGGC | [16874] |
| Cpi | GTTTTTCAGTTGCCTGCGG-TTGGTTAGAAGG-ACTCAGGCAGCTAAAGCAAGTCTGGGAC | [18318] |
| Cmy | GTTTTTCAGTTGCCTGTGG-TTGGTTAGAAGG-ACTCAGGCAGCTAAAGCAAGTCTGGGAC | [17983] |
| Psi | -----                                                         | [16454] |
| Asp | -----                                                         | [15603] |
| Ami | GTTTTTCAGTTGCCTGCGGGTTTATTTGGACG-ACTCAGGCAGCTAAAGCAAGTCTGGGAC | [17406] |
| Asi | GTTTTTCAGTTGCCTGCGGGTTTATTCAGACA-ACTCAGGCAGCTAAAGCAAGTCTGGGAC | [16824] |
| Tgu | GTTTTCCGTTGCCTGAGGTTTGTTCAGTG--ACTCAGGCAGCGAAAGCAAGTCTGGGAG   | [13707] |
| Cli | GTTTTCCGTTGCCTGCGG-TTTGTTCCAGTG-ACTCAGGCAGCGAAAGCAAGTCTGGGAG  | [16960] |
| Gga | GTTTTCCGTTGCCTGCGG-TGTGTTGCAGTG-ACTCAGGCAGCGAAAGCAAGTCTGGGAG  | [15258] |
| Xtr | GTTTTAAGTTGCCTGTGA-TTGTGGATAGA-GCACAGGCAGCTAAAGCAAGTCTGGGAA   | [15506] |
| Lch | GTTTTAAGTTGCCTGTGA-TTACATAGCAGA-ACTCAGGCAGCTAAAGCAAGTCTGGAAA  | [17422] |
| Dre | GTTTTAAGTTGCCTGCGA-TCTCTTAATG--ACTCAGGCAGCTAAAGCAAGTCTGGGAG   | [15743] |
|     |                                                               |         |
| Hsa | -----                                                         | [16415] |
| Mmu | -----                                                         | [16078] |
| Mdo | -----GATGGATTCTGGGAGTTGTAGCCTTTCAAACAGAGCTCT-GCATGTACA        | [15361] |
| Meu | -----GATGGATTCTGGGAGTTGTAGCCTTTCAAACAGAGCTCT-GAATGTACA        | [13129] |
| Oan | -----                                                         | [14184] |
| Aca | ATGAAAGGA--GGAACATTCTAGGAGTTGTAGTCTTTCAAACAGAGCTTT-GCAAGTACA  | [16851] |
| Pbi | ATGAAAGGT--GGAATATTCTAGGAGTTGTAGTGTTCCAAACAGAGCTTT-GCAAGAACA  | [16931] |
| Cpi | GCGCGAGGA--GGAATATTCTGGGAGTTGTAGTCTTTCAAACAGAGCTCT-GCAAGTATA  | [18375] |
| Cmy | GCGTGAGGA--GGAATATTCTGGGAGTTGTAGTCTTTCAAACAGAGCTCT-GCAAGTATA  | [18040] |
| Psi | -----GGAATATTCTGGGAGTTGTAGTCTTTCAAACAGAGCTCT-GCAAGTATA        | [16502] |
| Asp | -----GGAATATTCTGGGAGTTGTAGTCTTTCAAACAGAGCTCT-GCAAGTATA        | [15651] |
| Ami | GGGTGAGGA--GGAATATTCTGGGAGTTGTAGTCTTTCAAACAGAGCTTT-GCAAGTACA  | [17463] |
| Asi | GGGTGAGGA--GGAATATTCTGGGAGTTGTAGTCTTTCAAACAGAGCTTT-GCAAGTACA  | [16881] |
| Tgu | GCTGCGGAG--GGAATATTCTGGGAGTTGTAGTCTTTCAAACAGAGCTTC-ACAAGGACA  | [13764] |
| Cli | GCTGTGGAG--GGAATATTCTGGGAGTTGTAGTCTTTCAAACAGAGCTTC-GCAAGGACA  | [17017] |
| Gga | GCTGTGGAG--GGAATATTCTGGGAGTTGTAGTCTTTCAAACAGAGCTTT-GCAAGGACA  | [15315] |
| Xtr | GCTGGAGAC--GGAATGCTCTGGGAGTTGTAGTCTTTCAAACAG--CTGT-GAATTTCTA  | [15561] |
| Lch | GCAGGAGTC-----                                                | [17431] |
| Dre | GCCAGAGAC-----                                                | [15752] |
|     |                                                               |         |
| Hsa | -----                                                         | [16415] |
| Mmu | -----                                                         | [16078] |
| Mdo | CACCTGTATTGGAACACTACA----GCTCCCCGAACTTCC-----                 | [15397] |
| Meu | CACCTGTATTGGAACACTACA----GCTCCCCGAACTTCC-----                 | [13165] |
| Oan | -----                                                         | [14184] |
| Aca | TACCTGTATTGGAACACTACA----GCTCCAGGAACTTTC-----                 | [16887] |
| Pbi | TACCTGTATTGGAACACTACA----GCTCCAGGAACTTCC-----                 | [16967] |
| Cpi | TACCTGTATTGGAACACTACA----GCTCCCCGAACTTCC--GTTTCCCCAAACAGTAAG  | [18429] |
| Cmy | TACCTGTATTGGAACACTACA----GCTCCCCGAACTTCC--GTTTCCCCAAACAGTAAG  | [18094] |
| Psi | TACCTGTATTGGAATACTACA----GCTCCCTGAACTTCC--GTCTCCCCAAACAGTAAG  | [16556] |
| Asp | TACCTGTATTGGAATACTACA----GCTCCCTGAACTTCC--GTCTCCCCAAACAGTAAG  | [15705] |
| Ami | TACCTGTATTGGAACACTACA----GCTCCCTGAACTTCC--GCCGCCCCAACAGTAAG   | [17517] |
| Asi | TACCTGTATTGGAACACTACA----GCTCCCTGAACTTCC-----                 | [16917] |
| Tgu | TACCTGTATTGGAACACTACA----GCTCCCTGAACTTCC-----                 | [13800] |
| Cli | TACCTGTATTGGAACACTACA----GCTCCCTGAACTTCC--GCCCCCCGAACAGTAAG   | [17071] |
| Gga | TACCTGTATTGGAACACTACA----GCTCCCTGAACTTCC-----                 | [15351] |
| Xtr | TACCTGTATTGGAACACTACA----GCTCCTAGAAATTC--GCGTCTCGGAACAGTAAG   | [15615] |
| Lch | -----GGTTCTCAGAACAGTAAG                                       | [17449] |
| Dre | -----                                                         | [15752] |

Hsa ----- [16415]  
Mmu ----- [16078]  
Mdo ----- [15397]  
Meu ----- [13165]  
Oan ----- [14184]  
Aca ----- [16887]  
Pbi ----- [16967]  
Cpi AGTTTATGTGCGGTGAGAGCTAG-AATCTGCATGTGGACTCCTACTGCTCCGGGAGGCTG [18488]  
Cmy AGTTTATGTGCGGTGAGAGCTAG-AATCTGCATGTGAACTCCTACTGCTCTGGGAGGCTG [18153]  
Psi AGTTTACGTGCGGTGAGAGCTGG-AATCTGCAGGTGAACTCCTACTGCTCTGGGAGGCTG [16615]  
Asp AGTTTATGTGCGGTGACAGCTGC-AATCTGCATGTGAACTCCTACTGCTCTGGGAGGCTG [15764]  
Ami AGTTTATGTGCGGTGAGAGCTGG-AATCTGCATGTGAACTCCTACTGCTCCGGGCGGCGG [17576]  
Asi ----- [16917]  
Tgu ----- [13800]  
Cli AGTTGATGTGCGGT--GAGCTGC-ATCCTGCATGTGAGCTCCTACTGCCCGGGAGGCGG [17128]  
Gga ----- [15351]  
Xtr AGATTATGTGCTGTGTTATCAGGCAGCCGGCACATGGCCTTTTACTGCTCAGAGAGGCAG [15675]  
Lch AGTTTATGTGCTGTGAGTGTCTTCAACCAGCACATCAACTTTTACAGTTCAGGGCGGCGG [17509]  
Dre ----- [15752]

Hsa ----- [16415]  
Mmu ----- [16078]  
Mdo ---AGCCCTATGGGAAAGGTCCAATTTTACATGCCCTGTATGAAATAAAAA-GGGCTATG [15453]  
Meu ----- [13165]  
Oan ---AGACCTGTGGGACAGGTCCAATCTCACATGTCCTGTATAGAATAAAGG-GGGATATA [14240]  
Aca ---ACACTTGTGGTCAAGGTCCAACCTCACGTGTCCTGTATGCGATAAAAAGAGGGATGCG [16944]  
Pbi ---ACACTTGTGGTCAAGGTCCAACCTCATGTGTCCTGTATGCAATGAAAGTGGGATGCA [17024]  
Cpi G--AAACCTGTGGGAAAGGTCCAACCTCACATGTCCTGTATGTAATAAAG--GGGATGTA [18544]  
Cmy G--AGACCTGTGGGAAAGGTCCAACCTCACATGTCCTGTATATAATAAAG--GGGATATA [18209]  
Psi G--AGACCTGTGGGAAAGGTCCAACCTCACATGTCCTGTATGTACGGAAG--GGGATATA [16671]  
Asp G--AGACCTGTGGGAAAGGTCCAACCTCACATGTCCTGTGTGCAAGGAGG--GGGATATA [15820]  
Ami G--AGACCCGTGGGAAAGGTCCAACCTCACATGTCCTGTATGTCACGAGGA-GGGATATA [17633]  
Asi ---AGACCCGTGGGAAAGGTCCAACCTCACATGTCCTGTATGTCACGAGGA-GGGATATA [16973]  
Tgu ---AGACCTGTGGGAAAGGTCCAACCTCACATGTCCTGTATAGAATAAAGA-GGGATATA [13856]  
Cli G--AGACCTGTGGGAAAGGTCCAACCTCACATGTCCTGTATAGAATAAAGA-GGGATATA [17185]  
Gga ---AGACCTGTGGGAAAGGTCCAACCTCACATGTCCTGTATAGAATAAAGGA-GGGATATA [15407]  
Xtr G--GGGCGTGTGGGAAAGGTCCAGCCTCATATGTCCTGTG-ATCCTGAGG--GGGAGATA [15730]  
Lch G--AGACCTGTGGGAAAGGTCCAACCTCACATGTCCTGTATTAATAAAGGA-GGGATATA [17566]  
Dre ---AGCAATGTGAGAAAGGTCCAACCTCACATGTCCTGTGAGGCTGAAGGA-AGGCTGTG [15808]

Hsa ----- [16415]  
Mmu ----- [16078]  
Mdo TGTGGTTGGACCTGTCCACA-GGCC--CTTCCTGTCACTGCAGACAGTCAGTAGTTGG [15510]  
Meu -----CTTCCTGTCACTGCAGACAGTCAGTAGTTGG [13196]  
Oan TGTGGTCAGACCTATCCACA-GGCC--CTTCCTGTCACTGCAGACGGTCAGTAGTTGG [14297]  
Aca TGTGGTCAGACCTAGCCACA-GGCC--AGATCTGTCACTGCAGACAGTCAGTAGTTGG [17001]  
Pbi TGTGGTCAGACCTAGACCACA-AGGCC--TCTTCTGCCACTGCTGACAGTCAGTAGTTGG [17081]  
Cpi TGTGGTCAGACCTATCCACA-GGCC--CTTCCTGTCACTGCAGACAGTCAGTAGTTGG [18601]  
Cmy TGTGGTCAGACCTATCCACA-GGCC--CTTCCTGTCACTGCAGACAGTCAGTAGTTGG [18266]  
Psi TGTGGTCAGACCTGTCCACA-GGCC----- [16697]  
Asp TGTGGTCAGACCTATCCACA-GGCC----- [15846]  
Ami TGTGGTCAGACCTATCCACA-GGCC--CTTCCTGCCACTGCAGACAGTCAGCAGTTGG [17690]  
Asi TGTGGTCAGACCTATCCACA-GGCC--CTCCCTGCCACTGCAGACAGTCAGCAGTTGG [17030]  
Tgu TGTGGTCAGACCTATCCACA-AGTCC--GCTCCTGCC-CTGCGGACAGTCAGCAGTTGG [13912]  
Cli TGTGGTCAGACCTATCCACA-GGCC--GCTCCTGCC-CTGCGGACAGTCAGCAGTTGG [17241]  
Gga TGTGGTCAGACCTATCCACA-GGCC----- [15433]

```
Xtr TGTGGTCAGACCTGTCCCACA-GGCCG--TCTCCTGTTGCTGCAGACAGTCAGAAGTTGG [15787]
Lch TGTGGTCAGACCTATCCCACA-GGCTC--TCTC-TGTCCCCACGGACAGTCAGCAGTTGG [17622]
Dre TGAGGTTAGACCTATCCCACACGGCCC----- [15835]

Hsa -----GGTCTGGCTGT [16426]
Mmu -----GGTCTGGCTGT [16089]
Mdo TCTGGTGTGAGCAGGAATTCTCAGATCACCTCTTGGCTGTGAGTGGT--GGTCTGGCTGT [15568]
Meu TCTGGCGTGAGCAGGAATTCTCAGATCACCTCTTGGCTGTGAGTGGT----- [13243]
Oan TCTGGTGTGAGCAGCAATTCTCAGATCATCTCTTGGCTATGGATGGT--GGTCTGGCTGT [14355]
Aca TCTGGCATAAGCAGAAAGTTTTCAGATCACCTCTTGGCTGTGAGTAGT--CATCTGGCTGT [17059]
Pbi TCTGGGGTAAGCAGGAAATCTCAGATCATCTCTTGGCTGTGAGTGGT--CATCTGGCTGT [17139]
Cpi TCTGGCGAGAGCAGGAATTCTCAGATCACCTCTTGGCTGTGAGTGGT--GATTTGGCTGT [18659]
Cmy TCTGGCGTGAGCAGGAATTCTCAGATCACCTCTTGGCTGTGAGTGGT--GATTTGG--GT [18322]
Psi -----GATTTGGCTGT [16708]
Asp -----GATTTGGCTGT [15857]
Ami TCTGGCGTGAGCAGC-ATTCTCAGATCACCTCTTGGCTGTGGGTGGT--GATTTGGCTGT [17747]
Asi TCTGGCGTGAGCAGC-ATTCTCAGATCACCTCTTGGCTGTGGGTGGT--GATTTGGCTGT [17087]
Tgu TCTGGTGTGAGCAGCAATTCTCAGATCACCTCTTGGCTGTGGGTGGT--GATTTGGCTGT [13970]
Cli TCTGGTGTGAGCAGCGATTCTCAGATCACCTCTTGGCTGTGGGTGGT--GATTTGGCTGT [17299]
Gga -----GATTTGGCTGT [15444]
Xtr TCTGGCGTGAGAATAGATTCTCAGATCATCTCTTGGCTGATGCCAGC--GGTCTGACCCT [15845]
Lch TCTGGTGTGAGGGGA---TCTCAGATCAGCTCTTGGCTGTGGGTGGT--GGTCTGGCTGT [17677]
Dre ----- [15835]

Hsa TGTGGTGTGCAAAACTCCGTA---CATTGCTATTTTGGCCACACTGCAACACCTTACAG-- [16481]
Mmu TGTGGTGTGCAAAACTCCGTA---CATTGCTATTTTGGCCACACTGCAACACCTTACAG-- [16144]
Mdo TGTGGTGTGCAAAACTTCCTA---TGTTGCTTTTTTGGCCACACTGCAACACTTTACAG-- [15623]
Meu ----- [13243]
Oan TGTGGTGTGCAAAACTTCGTA---CATTGCTTTTTTGGCCACACTGCAACACTTTACAG-- [14410]
Aca TGTGGTGTGCAAAATTTTGTG---CATTGCC-TTTTGGCTGCACTGCAACACTTTACAG-- [17113]
Pbi TGTGGTGTGCAAAATTTTGTG---CATTGC-TTTTGGCTGCACTGCAACACTTTACAG-- [17192]
Cpi TGTGGTGTGCAAAACTTTGTA---CATTGCT-TTTTGGCCACACTGCAACACTTTACAG-- [18713]
Cmy TGTGGTGTGCAAAACTTTGTA---CATTGCT-TTTTGGCCACACTGCAACACTTTACAG-- [18376]
Psi TGTGGTGTGCAAAATCTTGTG---CATTGCC-TTTTGGCTGCACTGCAACACTTTACAG-- [16762]
Asp TGTGGTGTGCAAAACCTTGTG---CATTGCC-TTTTGGCTGCACTGCAACACTTTACAG-- [15911]
Ami TGTGGTGTGCAAAACTTTGTG---CGTTGCT-TTTTGGCCACACTGCAACACTTTACAG-- [17801]
Asi TGTGGTGTGCAAAACTTTGTG---CGTTGCT-TTTTGGCCACACTGCAACACTTTACAG-- [17141]
Tgu TGTGGTGTGCAAAACTTTGTA---CCTCGCT-TTTTGGCCACACTGCAACACTTTACAG-- [14024]
Cli TGTGGTGTGCAAAACTTTGTA---CCTTGTGCT-TTTTGGCCACACTGCAACACTTTACAG-- [17353]
Gga TGTGGTGTGCAAAACTTTGTA---CCTTGTGCT-TTTTGGCCACACTGCAACACTTTACAG-- [15498]
Xtr TGTGGTGTGCAAAACCTTATTTGCCCTCCCTGTTTTGGCCACACTGCGACACTCTACAG-- [15903]
Lch TGTGGTGTGCAAAATCTGTG---CATTTC-TTTTGGCCACACTGCAACACTTTACAG-- [17731]
Dre ----- [15835]

Hsa GAGTGCATTGTGATTTCCAATAAATTGAGGCAGTGGT-TCT-AAAAGCTGTCTACATTAAT [16539]
Mmu GAGTGCATTGTGATTTCCAATAAATTGAGGCAGTGGT-TCT-AAAAGCTGTCTACATTAAT [16202]
Mdo GAATGCATTGTGATTTCCAATAAATTGAGACAGTGAT-TCT-AAAAGCTGTCTACATTAAT [15681]
Meu GAATGTATTGTGATTTCCAATAAATTGAGGCAGTGAT-TTT-AAAAGCTGTCTACATTAAT [13301]
Oan ----- [14410]
Aca GAATGCATTGTGATTTCCAGTAATTGAGACAGTGAT-TCT-GAAAGCTGTCTACATTAAT [17171]
Pbi GAATGCATTGTGATTTCCAGTAATTGAGACAGTGAT-TCT-GAAAGCTGTCCACATTAAT [17250]
Cpi GAATGCATTGTGATTTCCAATAAATTGAGACAGTGAT-TCT-GAAAGCTGTCTACATTAAT [18771]
Cmy GAATGCATTGTGATTTCCAATAAATTGAGACAGTGAT-TCT-GAAAGCTGTCTACATTAAT [18434]
Psi GAATGCATTGTGATTTCCAATAAATTGAGACAGTGAT-TCT-GAAAGCTGTCTACATTAAT [16820]
Asp GAATGCATTGTGATTTCCAATAAATTGAGACAGTGAT-TTT-GAAAGCTGTCTACATTAAT [15969]
Ami GAATGCATTGTGATTTCCAATAAATTGAGACAGTGAT-TCT-GAAAGCTGTCTACATTAAT [17859]
Asi GAATGCATTGTGATTTCCAATAAATTGAGACAGTGAT-TCT-GAAAGCTGTCTACATTAAT [17199]
```

---

---

Tgu ----- [14024]  
Cli GAATGCATTGTGATTTCCAATAATTGAGACAGTGAT-TCT-GAAAGCTGTCTACATTAAT [17411]  
Gga GAATGCATTGTGATTTCCAATAATTGAGACAGTGAT-TCT-GAAAGCTGTCTACATTAAT [15556]  
Xtr GAATACATTGTGATTTCCAGTAATAGAGACAGTATT-TCT-GAAGGCTGTCTACATTAAT [15961]  
Lch GAATGCATTGTGATTTCCAATAATTGAGACAGTAAT-TCT-GACAGCTGTCTACATTAAT [17789]  
Dre GAATGCATTGTGATTTCCAATAATTGAGACAGTAATTTCTAAAAAGCTGTCTACATTAAT [15895]

Hsa GAAAAGAGCAATGTGGCCA [16558]  
Mmu GAAAAGAGCAATGTGGCCA [16221]  
Mdo GAAAAGAACAATGTAGTCA [15700]  
Meu CAAAAGAACAATGCAGTCA [13320]  
Oan ----- [14410]  
Aca GAAAAGAACAATGTAGTCA [17190]  
Pbi GAAAAGAACAATGTAGTCA [17269]  
Cpi GAAAAGAACAATGTAGTCA [18790]  
Cmy GAAAAGAACAATGTAGTCA [18453]  
Psi GAAAAGAACAATGTAGTCA [16839]  
Asp GAAAAGAACAATGTAGTCA [15988]  
Ami GAAAAGAACAATGTAGTCA [17878]  
Asi GAAAAGAACAATGTAGTCA [17218]  
Tgu ----- [14024]  
Cli GAAAAGAACAATGTAGTCA [17430]  
Gga GAAAAGAACAATGTAGTCA [15575]  
Xtr GAAAAGAGCAATGTAGTCA [15980]  
Lch GAAAAGAACAATGTAGTCA [17808]  
Dre GAAAAGAACAATGTAGTCA [15914]

;  
END;

| New Name   | Gentic Anchor(s)         | Hsa      | Mmu            | Gga      | Aca               | Xtr              | Dre      |
|------------|--------------------------|----------|----------------|----------|-------------------|------------------|----------|
| Let-7      |                          |          |                |          |                   |                  |          |
| let-7-P1   | miR-100, miR-125b-1      | let-7a-2 | let-7a-2       | let-7a-2 | let-7a-2 (new, IX |                  |          |
| let-7-P1a  |                          |          |                |          |                   |                  | let-7a-2 |
| let-7-P1b  |                          |          |                |          |                   |                  | let-7a-4 |
| let-7-P2   | miR-99b, miR-125a        | let-7e   | let-7e         | X        | let-7c-2          | let-7a           |          |
| let-7-P2a  |                          |          |                |          |                   |                  | let-7d-1 |
| let-7-P2b  |                          |          |                |          |                   |                  | let-7d-2 |
| let-7-P3   | miR-99a, miR-125b-2      | let-7c   | let-7c-1       | let-7c   | let-7c-1          | let-7c           |          |
| let-7-P3a  |                          |          |                |          |                   |                  | let-7c-1 |
| let-7-P3b  |                          |          |                |          |                   |                  | let-7c-2 |
| let-7-P4   | let-7a-1, let-7f-1       | let-7d   | let-7d         | let-7d   | let-7d            | X                | X        |
| let-7-P5   | let-7a-1, let-7d         | let-7f-1 | let-7f-1       | let-7f   | let-7f-2          | X                | let-7f   |
| let-7-P6   | PDPDC1, let-7d, let-7f-1 | let-7a-1 | let-7a-1       | let-7a-1 | let-7a            | let-7e-1         | let-7a-1 |
| let-7-P7   | let-7b                   | let-7a-3 | let-7c-2       | let-7a-3 | let-7a-3 (new)    | let-7e-2         | let-7a-3 |
| let-7-P8   | let-7a-3                 | let-7b   | let-7b         | let-7b   | let-7b            | let-7b (?)       | let-7b   |
| let-7-P9   | let-7f-2                 | miR-98   | miR-98         | X        | miR-98            | miR-98           | let-7h   |
| let-7-P10  | miR-98                   | let-7f-2 | let-7f-2       | X        | let-7f-1          | let-7f           |          |
| let-7-P10a |                          |          |                |          |                   |                  | let-7g-2 |
| let-7-P10b |                          |          |                |          |                   |                  | let-7g-1 |
| let-7-P11  | WRD82, miR-135a-1        | let-7g   | let-7g         | let-7g   | let-7g            | let-7g           | let-7j   |
| let-7-P12  | MON2, PPM1H              | let-7i   | let-7i         | let-7i   | let-7i            | let-7i           | let-7i   |
| let-7-P13  | PI16, MTCH1              | X        | X              | let-7j   | let-7a-4 (new - X |                  |          |
| let-7-P13a |                          |          |                |          |                   |                  | let-7a-5 |
| let-7-P13b |                          |          |                |          |                   |                  | let-7a-6 |
| let-7-P14  | PI16, MTCH1              | X        | X              | let-7k   | let-7e            | X                |          |
| miR-1      |                          |          |                |          |                   |                  |          |
| miR-1-P1   | GATA5, NTSR1             | miR-1-1  | miR-1a-1       | miR-1a-1 | miR-1a-2          | miR-1a-2 (phylog | miR-1-1  |
| miR-1-P2   | MIB1                     | miR-1-2  | miR-1a-2/miR-1 | miR-1a-2 | miR-1a-1          | miR-1a-1         | miR-1-2  |









|            |                          |           |           |                                         |                         |                |                 |
|------------|--------------------------|-----------|-----------|-----------------------------------------|-------------------------|----------------|-----------------|
| miR-19-P2  | miR-17 cluster           | miR-19b-1 | miR-19b-1 | miR-19b-1 (old miR-19b-1 (old miR-19b-2 |                         |                |                 |
| miR-19-P3  | miR-106/18b cluster      | miR-19b-2 | miR-19b-2 | miR-19b-2 (nev miR-19b-2 (nev miR-19b-1 |                         |                |                 |
| miR-23-P1  | miR-23a/24-2/27a cluster | miR-23a   | miR-23a   | X                                       | miR-23a                 | miR-23a-1      | miR-23a-2       |
| miR-23-P1a |                          |           |           |                                         |                         |                | miR-23a-4       |
| miR-23-P1b |                          |           |           |                                         |                         |                |                 |
| miR-23-P2  | miR-23b/24-1/27b cluster | miR-23b   | miR-23b   | miR-23b                                 | miR-23b                 | miR-23b        | miR-23b         |
| miR-23-P2a |                          |           |           |                                         |                         |                | miR-23c (new, C |
| miR-23-P2b |                          |           |           |                                         |                         |                |                 |
| miR-23-P3  |                          | X         | X         | X                                       | X                       | miR-23a-2      |                 |
| miR-23-P3a |                          |           |           |                                         |                         |                | miR-23a-1       |
| miR-23-P3b |                          |           |           |                                         |                         |                | miR-23a-3       |
| miR-24-P1  | miR-23a/24-2/27a cluster | miR-24-2  | miR-24-2  | X                                       | miR-24-1                | miR-24b        |                 |
| miR-24-P1a |                          |           |           |                                         |                         |                | miR-24-2        |
| miR-24-P1b |                          |           |           |                                         |                         |                | miR-24-5        |
| miR-24-P2  | miR-23b/24-1/27b cluster | miR-24-1  | miR-24-1  | miR-24                                  | miR-24-2                | miR-24a        |                 |
| miR-24-P2a |                          |           |           |                                         |                         |                | miR-24-1        |
| miR-24-P2b |                          |           |           |                                         |                         |                | miR-24-3        |
| miR-24-P3  |                          | X         | X         | X                                       | X                       | X              | miR-24-4        |
| miR-26-P1  | CTDSPL                   | miR-26a-1 | miR-26a-1 | miR-26a                                 | miR-26-2                | miR-26-3 (new) |                 |
| miR-26-P1a |                          |           |           |                                         |                         |                | miR-26a-2       |
| miR-26-P1b |                          |           |           |                                         |                         |                | miR-26a-3       |
| miR-26-P2  | CTDSP2                   | miR-26a-2 | miR-26a-2 | X                                       | miR-26-3 (new, miR-26-1 |                | miR-26b         |
| miR-26-P3  | CTDSP1                   | miR-26b   | miR-26b   | miR-26a-2 (nev miR-26-1                 | miR-26-2                |                | miR-26a-1       |
| miR-27-P1  | miR-23a/24-2/27a cluster | miR-27a   | miR-27a   | X                                       | miR-27a                 | miR-27a        |                 |
| miR-27-P1a |                          |           |           |                                         |                         |                | miR-27c-1       |
| miR-27-P1b |                          |           |           |                                         |                         |                | miR-27c-2       |
| miR-27-P2  | miR-23b/24-1/27b cluster | miR-27b   | miR-27b   | miR-27b                                 | miR-27b                 | miR-27b        |                 |

|            |                 |           |           |                |                 |             |           |           |
|------------|-----------------|-----------|-----------|----------------|-----------------|-------------|-----------|-----------|
| miR-27-P2a |                 |           |           |                |                 |             |           | miR-27d   |
| miR-27-P2b |                 |           |           |                |                 |             |           | miR-27b   |
| miR-27-P3a |                 | X         | X         | X              | X               |             |           | miR-27e   |
| miR-27-P3b |                 |           |           |                |                 |             |           | miR-27a   |
| miR-27-P3c |                 |           |           |                |                 |             | miR-27c-1 |           |
| miR-27-P3d |                 |           |           |                |                 |             | miR-27c-2 |           |
| miR-29     |                 |           |           |                |                 |             |           |           |
| miR-29-P1  | miR-29a cluster | miR-29a   | miR-29a   | miR-29a        | miR-29a-1       | miR-29a     |           | miR-29a   |
| miR-29-P2  | miR-29a cluster | miR-29b-1 | miR-29b-1 | miR-29b-1      | miR-29b-2       | miR-29d     |           | miR-29b-2 |
| miR-29-P3  | miR-29c cluster | miR-29c   | miR-29c   | miR-29c        | miR-29a-2       | miR-29c     |           | X         |
| miR-29-P4  | miR-29c cluster | miR-29b-2 | miR-29b-2 | miR-29b-2      | miR-29b-1       | miR-29b     |           | miR-29b-1 |
| miR-30     |                 |           |           |                |                 |             |           |           |
| miR-30-P1  | miR-30c-2       | miR-30a   | miR-30a   | miR-30a        | miR-30a         | miR-30a     |           | miR-30a   |
| miR-30-P2  | miR-30a         | miR-30c-2 | miR-30c-2 | miR-30c-2      | miR-30c         | miR-30c-2   |           | X         |
| miR-30-P3  | miR-30c-1       | miR-30e   | miR-30e   | miR-30e        | miR-30e         | miR-30e     |           | miR-30e-2 |
| miR-30-P4  | miR-30e         | miR-30c-1 | miR-30c-1 | miR-30c-1      | miR-30c-2 (new) | miR-30c-1   |           | miR-30c   |
| miR-30-P5  | miR-30b         | miR-30d   | miR-30d   | miR-30d        | miR-30d         | miR-30d     |           | miR-30d   |
| miR-30-P6  | miR-30d         | miR-30b   | miR-30b   | miR-30b        | miR-30b         | miR-30b     |           | miR-30b   |
| miR-33     |                 |           |           |                |                 |             |           |           |
| miR-33-P1  | SREBF2          | miR-33a   | miR-33    | miR-33         | miR-33-1        | miR-33b     |           | X         |
| miR-33-P2  | SREBF1          | miR-33b   | X         | miR-33-2 (new) | miR-33-2        | miR-33a     |           | X         |
| miR-34     |                 |           |           |                |                 |             |           |           |
| miR-34-P1  | GPR157, H6PD    | miR-34a   | miR-34a   | miR-34a        | miR-34b         | miR-34a     |           |           |
| miR-34-P2a | BTG4            | miR-34b   | miR-34b   | miR-34b        | miR-34c         | miR-34b-1-4 |           |           |
| miR-34-P2b | BTG4            | miR-34c   | miR-34c   | miR-34c        | miR-34a         | X           |           |           |
| miR-34-P3a | CDC20B          | miR-449a  | miR-449a  | miR-449a       | miR-449a        | miR-449a    |           |           |
| miR-34-P3b | CDC20B          | miR-449b  | miR-449b  | miR-449b       | X               | miR-449b    |           |           |
| miR-34-P3c | CDC20B          | miR-449c  | miR-449c  | X              | miR-449b        | miR-449c    |           |           |

|             |                     |                |            |                                |                 |                  |                 |
|-------------|---------------------|----------------|------------|--------------------------------|-----------------|------------------|-----------------|
| miR-34-P3d  | cdc20b              | X              | X          | X                              | miR-449c        | X                |                 |
| miR-92      |                     |                |            |                                |                 |                  |                 |
| miR-92-P1   | miR-17 cluster      | miR-92a-1      | miR-92a-1  | miR-92                         | miR-92a-1       | miR-92a-1        |                 |
| miR-92-P1a  |                     |                |            |                                |                 |                  | miR-92a-1       |
| miR-92-P1b  |                     |                |            |                                |                 |                  | miR-92a-2       |
| miR-92-P2   | miR-106/18b cluster | miR-92a-2      | miR-92a-2  | miR-92a-2 (new)                | miR-92a-2       | miR-92a-2        | X               |
| miR-92-P3   | miR-93 cluster      | miR-25         | miR-25     | X                              | X               | miR-25           | miR-25          |
| miR-92-P4   | MTX1                | miR-92b        | miR-92b    | X                              | X               | miR-92b (phylog) | miR-92b         |
| miR-96-P1   | miR-96 cluster      | miR-96         | miR-96     | miR-96 (new, E Reads detectec) | miR-96          | miR-96           |                 |
| miR-96-P2   | miR-96 cluster      | miR-182        | miR-182    | miR-182 (new, miR-182 (locus)  | miR-182         | miR-182          |                 |
| miR-96-P3   | miR-96 cluster      | miR-183        | miR-183    | miR-183                        | miR-183         | miR-183          | Reads detectec  |
| miR-101-P1  | JAK1, AK4           | miR-101-1      | miR-101a   | miR-101-2                      | miR-101-1       | miR-101a-2       | miR-101a        |
| miR-101-P2  | JAK2, RCL1          | miR-101-2      | miR-101b   | miR-101-1                      | miR-101-2       | miR-101a-1       | miR-101b        |
| miR-103-P1  | PANK3               | miR-103a-1/miR | miR-103-1  | miR-103-1                      | miR-103         | miR-103-1        | X               |
| miR-103-P2  | PANK2               | miR-103a-2/miR | miR-103-2  | miR-103-2                      | miR-103-2 (new) | miR-103-2        | miR-103         |
| miR-103-P3  | PANK1               | miR-107        | miR-107    | miR-107                        | miR-107         | miR-107          |                 |
| miR-103-P3a |                     |                |            |                                |                 |                  | miR-107a        |
| miR-103-P3b |                     |                |            |                                |                 |                  | miR-107b        |
| miR-124     |                     |                |            |                                |                 |                  |                 |
| miR-124-P1  | MSRA                | miR-124-1      | miR-124a-1 | X                              | miR-124b        | miR-124-2 (new)  | miR-124-2       |
| miR-124-P2  | CYP7B1, GGH         | miR-124-2      | miR-124-2  | miR-124a/miR-                  | miR-124a-1      | miR-124          |                 |
| miR-124-P2a |                     |                |            |                                |                 |                  | miR-124-1 (phy) |
| miR-124-P2b |                     |                |            |                                |                 |                  | miR-124-3 (phy) |
| miR-124-P3  | YTHDF1              | miR-124-3      | miR-124-3  | miR-124a-2                     | miR-124a-2      | miR-124-3 (new)  | miR-124-6       |
| miR-124-P4  | ythdf2              | X              | X          | miR-124b                       | miR-124a-3      | X                | miR-124-4       |
| miR-124-Po1 |                     |                |            |                                |                 |                  | miR-124-5 (mig) |

|             |                 |            |            |            |                 |                  |                |
|-------------|-----------------|------------|------------|------------|-----------------|------------------|----------------|
| miR-128-P1  | R3HDM1          | miR-128-1  | miR-128-1  | miR-128-1  | miR-128-2       | miR-128-1        | miR-128-2 (new |
| miR-128-P2  | ARPP21          | miR-128-2  | miR-128-2  | miR-128-2  | miR-128-1       | miR-128-2 (phyl) | miR-128-1      |
| miR-129-P1  | LRRC4           | miR-129-1  | miR-129-1  | X          | miR-129a (phyl) | miR-129-2?       |                |
| miR-129-P1a |                 |            |            |            |                 |                  | miR-129-1      |
| miR-129-P1b |                 |            |            |            |                 |                  | miR-129-3 (new |
| miR-129-P2  | HSD17B12        | miR-129-2  | miR-129-2  | X          | miR-129b (phyl) | miR-129-1        |                |
| miR-129-P2a |                 |            |            |            |                 |                  | miR-129-2      |
| miR-129-P2b |                 |            |            |            |                 |                  | miR-129-4 (new |
| miR-130-P1  | UBE2L6          | miR-130a   | miR-130a   | X          | miR-130a-1      | X                | X              |
| miR-130-P2  | PPIL2, miR-301b | miR-130b   | miR-130b   | miR-130b   | miR-130b        | miR-130b         | miR-130b       |
| miR-130-P3  | PPIL2, miR-130b | miR-301b   | miR-301b   | miR-301a   | miR-301b        | miR-301-2        |                |
| miR-130-P3a |                 |            |            |            |                 |                  | miR-301b       |
| miR-130-P3b |                 |            |            |            |                 |                  | miR-301c       |
| miR-130-P4  | ppil2, miR-130b | X          | X          | miR-130a   | miR-130c        | miR-130c         |                |
| miR-130-P4a |                 |            |            |            |                 |                  | miR-130c-2     |
| miR-130-P4b |                 |            |            |            |                 |                  | miR-130c-1     |
| miR-130-P5  | ska2, smg8      | X          | X          | miR-130c   | miR-130a-2      | miR-130a         | miR-130a       |
| miR-130-P6  | SKA2, SMG8      | miR-301a   | miR-301a   | miR-301b   | miR-301a        | miR-301-1        | miR-301a       |
| miR-132-P1  | miR-132/miR-212 | miR-132    | miR-132    | X          | miR-132 (phyl)  | miR-132          |                |
| miR-132-P1a |                 |            |            |            |                 |                  | miR-132-1      |
| miR-132-P1b |                 |            |            |            |                 |                  | miR-132-2/132- |
| miR-132-P2  | miR-132/miR-212 | miR-212    | miR-212    | X          | miR-212 (phyl)  | miR-212          | miR-212        |
| miR-133     |                 |            |            |            |                 |                  |                |
| miR-133-P1  | GATA5, NTSR1    | miR-133a-2 | miR-133a-2 | miR-133a-2 | miR-133a-1      | miR-133c         | miR-133a-2     |
| miR-133-P2  | MIB1            | miR-133a-1 | miR-133a-1 | miR-133a-1 | miR-133a-2      | miR-133a         | miR-133a-1     |
| miR-133-P3  | IL17A, PKHD1    | miR-133b   | miR-133b   | miR-133b   | miR-133b (new)  | miR-133b         |                |



|             |                  |            |            |                              |                |                           |               |
|-------------|------------------|------------|------------|------------------------------|----------------|---------------------------|---------------|
| miR-153-P2  | PTPRN2           | miR-153-2  | miR-153    | miR-153                      | miR-153-1      | miR-153-2 (phylc miR-153a |               |
| miR-155-P1  | JAM2, APP        | miR-155    | miR-155    | miR-155                      | miR-155        | miR-155                   | miR-155       |
| miR-155-P2  | ?                | X          | X          | X                            | miR-155b (newX |                           | X             |
| miR-181-P1  | miR-181b-1       | miR-181a-1 | miR-181a-1 | miR-181a-1                   | miR-181a-1     | miR-181a-1                | miR-181a-1    |
| miR-181-P2  | miR-181a-1       | miR-181-b1 | miR-181b-1 | miR-181b-1                   | miR-181b-2     | miR-181-b1                | new (CABZ0103 |
| miR-181-P3  | miR-181b-2       | miR-181a-2 | miR-181a-2 | miR-181a-2                   | miR-181a-2     | miR-181a-2                | miR-181a-2    |
| miR-181-P4  | miR-181a-2       | miR-181b-2 | miR-181b-2 | miR-181b-2                   | miR-181b-1     | miR-181b-2                | miR-181b-2    |
| miR-181-P5  | miR-181d         | miR-181c   | miR-181c   | X                            | miR-181a-3     | X                         |               |
| miR-181-P5a |                  |            |            |                              |                |                           | new (BX649502 |
| miR-181-P5b |                  |            |            |                              |                |                           | new (CU571393 |
| miR-181-P6  | miR-181c         | miR-181d   | miR-181d   | X                            | miR-181c (newX |                           |               |
| miR-181-P6a |                  |            |            |                              |                |                           | miR-181b-1    |
| miR-181-P6b |                  |            |            |                              |                |                           | miR-181c      |
| miR-190     |                  |            |            |                              |                |                           |               |
| miR-190-P1  | TLN2             | miR-190a   | miR-190a   | miR-190                      | miR-190a       | X                         | miR-190a      |
| miR-190-P2  | TPM3             | miR-190b   | miR-190b   | miR-190b (new miR-190b (phyl |                | miR-190                   | miR-190b      |
| miR-192-P1  | EHD1, miR-194-2  | miR-192    | miR-192    | X                            | X              | miR-192                   | miR-192       |
| miR-192-P2  | IARS2, miR-194-1 | miR-215    | miR-215    | miR-215                      | miR-215        | miR-215                   | X             |
| miR-193     |                  |            |            |                              |                |                           |               |
| miR-193-P1  | miR-365b         | miR-193a   | miR-193a   | miR-193a (phyl miR-193       |                | X                         |               |
| miR-193-P1a |                  |            |            |                              |                |                           | miR-193a-1    |
| miR-193-P1b |                  |            |            |                              |                |                           | miR-193a-2    |
| miR-193-P2  | miR-193a         | miR-365b   | miR-365-2  | miR-365-2 (phy miR-365       |                | X                         |               |
| miR-193-P2a |                  |            |            |                              |                |                           | miR-365-2     |
| miR-193-P2b |                  |            |            |                              |                |                           | miR-365-3     |
| miR-193-P3  | miR-365a         | miR-193b   | miR-193b   | miR-193b                     | X              | miR-193                   | miR-193b      |

|             |                    |            |            |           |                |                      |               |
|-------------|--------------------|------------|------------|-----------|----------------|----------------------|---------------|
| miR-193-P4  | miR-193b           | miR-365a   | miR-365-1  | miR-365-1 | X              | miR-365              | miR-365-1     |
| miR-194-P1  | EHD1, miR-192      | miR-194-2  | miR-194-2  | X         | miR-194-2      | miR-194-2            | miR-194a      |
| miR-194-P1a |                    |            |            |           |                |                      | miR-194b      |
| miR-194-P1b |                    |            |            |           |                |                      | X             |
| miR-194-P2  | IARS2, miR-215     | miR-194-1  | miR-194-1  | miR-194   | miR-194-1      | miR-194-1            |               |
| miR-196-P1  | HOXB               | miR-196a-1 | miR-196a-1 | miR-196-1 | miR-196c       | X                    | miR-196b      |
| miR-196-P2  | HOXC               | miR-196a-2 | miR-196a-2 | miR-196-3 | miR-196a-2     | miR-196a             |               |
| miR-196-P2a |                    |            |            |           |                |                      | miR-196a-1    |
| miR-196-P2b |                    |            |            |           |                |                      | miR-196c      |
| miR-196-P3  | HOXA               | miR-196b   | miR-196b   | miR-196-2 | miR-196a-1     | miR-196b             |               |
| miR-196-P3a |                    |            |            |           |                |                      | miR-196a-2    |
| miR-196-P3b |                    |            |            |           |                |                      | miR-196d      |
| miR-199-P1  | DNM2               | miR-199a-1 | miR-199a-1 | X         | miR-199a-1     | miR-199b             | miR-199-2     |
| miR-199-P2  | DNM3, miR-214 (?)  | miR-199a-2 | miR-199a-2 | miR-199-2 | miR-199a-2 (p) | miR-199a             | miR-199-1     |
| miR-199-P3  | DNM1               | miR-199b   | miR-199b   | miR-199-1 | miR-199b       | X                    | miR-199-3     |
| miR-204-P1  | TRPM3              | miR-204    | miR-204    | miR-204-1 | miR-204a-2     | miR-204-2            | miR-204-1     |
| miR-204-P2  | TRPM1              | miR-211    | miR-211    | miR-204-2 | miR-204a-1     | miR-204-1            |               |
| miR-204-P2a |                    |            |            |           |                |                      | miR-204-2     |
| miR-204-P2b |                    |            |            |           |                |                      | new (ENSDARG) |
| miR-204-P3  | ?                  | X          | X          | miR-211   | X              | X                    | X             |
| miR-205-P1  | LAMB3, CAMK1G      | miR-205    | miR-205    | miR-205a  | miR-205a       | miR-205a             |               |
| miR-205-P2  | ENSGALG00000008449 | X          | X          | miR-205b  | miR-205b       | miR-205b (phylogeny) |               |
| miR-208-P1  | MYH6               | miR-208a   | miR-208a   | X         | miR-208 (phyl) | miR-208              | X             |
| miR-208-P2  | MYH7               | miR-208b   | miR-208b   | X         | X              | X                    | miR-736       |



|                     |                     |                |                |               |                 |                     |               |
|---------------------|---------------------|----------------|----------------|---------------|-----------------|---------------------|---------------|
| miR-216             |                     |                |                |               |                 |                     |               |
| miR-216-P1          | miR-216b, miR-217   | miR-216a       | miR-216a       | miR-216a      | miR-216a        | miR-216             | miR-216a      |
| miR-216-P2          | miR-216a, miR-217   | miR-216b       | miR-216b       | miR-216b      | miR-216b        | X                   | miR-216b      |
| miR-218             |                     |                |                |               |                 |                     |               |
| miR-218-P1          | SLIT2               | miR-218-1      | miR-218-1      | miR-218-1     | miR-218-1       | miR-218-1           | miR-218a-2    |
| miR-218-P2          | SLIT3               | miR-218-2      | miR-218-2      | miR-218-2     | miR-218-2       | miR-218-2           | miR-218a-1    |
| miR-218-P3          |                     | X              | X              | X             | X               | X                   | miR-218b      |
| miR-219             |                     |                |                |               |                 |                     |               |
| miR-219-P1          | RING1               | miR-219a-1     | miR-219a-1/mif | X             | miR-219-2 (phy) | X                   | miR-219-3     |
| miR-219-P2          | URM1                | miR-219a-2/miR | miR-219a-2/mif | miR-219a/miR- | miR-219-1       | miR-219 (phylogeny) |               |
| miR-219-P2a         |                     |                |                |               |                 |                     | miR-219-1     |
| miR-219-P2b         |                     |                |                |               |                 |                     | miR-219-2     |
| miR-221             |                     |                |                |               |                 |                     |               |
| miR-221-P1          | miR-222             | miR-221        | miR-221        | miR-221       | miR-221         | miR-221             | miR-221       |
| miR-221-P2          | miR-221             | miR-222        | miR-222        | miR-222a      | miR-222         | miR-222             | miR-222a      |
| miR-221-P3          | fundc2              | X              | X              | miR-222b      | miR-222b (new)  | X                   | miR-222b      |
| miR-223             |                     |                |                |               |                 |                     |               |
| miR-223-P1          | MSN, HEPH           | miR-223        | miR-223        | miR-223       | miR-223         | miR-223             | miR-223       |
| miR-223-P2          | VPS13B              | miR-599        | miR-599        | X             | X               | X                   | X             |
| miR-338             |                     |                |                |               |                 |                     |               |
| miR-338-P1          | AATK                | miR-338        | miR-338        | miR-338 (new, | miR-338         | miR-338-1           |               |
| miR-338-P1a         |                     |                |                |               |                 |                     | miR-338-1     |
| miR-338-P1b         |                     |                |                |               |                 |                     | new (ENSDARG) |
| miR-338-P2          | lmtk2               | X              | X              | X             | X               | miR-338-2           | miR-338-2     |
| miR-302/367 cluster |                     |                |                |               |                 |                     |               |
| miR-430-P1          | miR-302/367 cluster | miR-302a       | miR-302a       | miR-302a      | miR-302a (new)  | miR-302             |               |
| miR-430-P2          | miR-302/367 cluster | miR-302b       | miR-302b       | miR-302b      | miR-302         | X                   |               |
| miR-430-P3          | miR-302/367 cluster | miR-302c       | miR-302c       | miR-302c      | X               | X                   |               |
| miR-430-P4          | miR-302/367 cluster | miR-302d       | miR-302d       | miR-302d      | X               | X                   |               |

|            |                 |          |          |          |          |                 |          |
|------------|-----------------|----------|----------|----------|----------|-----------------|----------|
| miR-454-P1 | SKA2, miR-301a  | miR-454  | X        | X        | X        | X               | miR-454a |
| miR-454-P2 | ppil2, miR-130b | X        | X        | miR-454  | miR-454  | miR-454 (new E) | miR-454b |
| miR-460-P1 | pth1r           | X        | X        | miR-460a | miR-460a | miR-460a (new,  | miR-460  |
| miR-460-P2 | htr2c           | X        | X        | miR-460b | miR-460b | miR-460b (new,  | miR-730  |
| miR-551-P1 | MEGF6           | miR-551a | X        | X        | X        | miR-551a (new)  | X        |
| miR-551-P2 | MECOM           | miR-551b | miR-551b | miR-551  | miR-551  | miR-551b (new,  | X        |

#NEXUS

[MacClade 4.08 registered to Kevin J. Peterson, Dartmouth College]

BEGIN DATA;        DIMENSIONS    NTAX=19 NCHAR=238;        FORMAT  
SYMBOLS= " 0 1 2" MISSING=? GAP=- ;

CHARSTATELABELS                    1 'let-7-P1 (1-72)', 2 'let-7-P2 (75-150)', 3 'let-7-P3 (153-225)', 4 'let-7-P4 (228-310)', 5 'let-7-P5 (313-397)', 6 'let-7-P6 (400-479)', 7 'let-7-P7 (482-558)', 8 'let-7-P8 (561-643)', 9 'let-7-P9 (646-730)', 10 'let-7-P10 (733-811)', 11 'let-7-P11 (814-899)', 12 'let-7-P12 (902-984)', 13 'let-7-P13 (987-1068)', 14 'let-7-P14 (1071-1147)', 15 'miR-1-P1 (1150-1231)', 16 'miR-1-P2 (1234-1317)', 17 'miR-1-P3 (1320-1403)', 18 'miR-1-P4 (1406-1491)', 19 'miR-7-P1 (1494-1581)', 20 'miR-7-P2 (1584-1673)', 21 'miR-7-P3 (1676-1763)', 22 'miR-7-P4 (1766-1851)', 23 'miR-8-P1 (1854-1939)', 24 'miR-8-P2 (1942-2024)', 25 'miR-8-P3 (2027-2111)', 26 'miR-8-P4 (2114-2201)', 27 'miR-8-P5 (2204-2291)', 28 'miR-9-P1 (2294-2382)', 29 'miR-9-P2 (2385-2469)', 30 'miR-9-P3 (2472-2557)', 31 'miR-9-P4 (2560-2647)', 32 'miR-10-P1a (2650-2730)', 33 'miR-10-P1b (2733-2817)', 34 'miR-10-P1c (2820-2904)', 35 'miR-10-P2a (2907-2986)', 36 'miR-10-P2b (2989-3069)', 37 'miR-10-P2c (3072-3154)', 38 'miR-10-P3a (3157-3244)', 39 'miR-10-P3b (3247-3335)', 40 'miR-10-P3c (3338-3422)', 41 'miR-15-P1 (3425-3503)', 42 'miR-15-P2 (3506-3589)', 43 'miR-15-P3 (3592-3673)', 44 'miR-15-P4 (3676-3759)', 45 'miR-15-P5 (3762-3844)', 46 'miR-15-P6 (3847-3934)', 47 'miR-15-P7 (3937-4024)', 48 'miR-15-P8 (4027-4118)', 49 'miR-17-P1 (4121-4201)', 50 'miR-17-P2 (4204-4286)', 51 'miR-17-P3 (4289-4366)', 52 'miR-17-P4 (4369-4445)', 53 'miR-17-P5 (4448-4530)', 54 'miR-17-P6 (4533-4615)', 55 'miR-17-P7 (4618-4697)', 56 'miR-17-P8 (4700-4779)', 57 'miR-19-P1 (4782-4862)', 58 'miR-19-P2 (4865-4949)', 59 'miR-19-P3 (4952-5043)', 60 'miR-21 (5046-5134)', 61 'miR-22 (5137-5227)', 62 'miR-23-P1 (5230-5316)', 63 'miR-23-P2 (5319-5499)', 64 'miR-23-P3 (5402-5487)', 65 'miR-24-P1 (5490-5582)', 66 'miR-24-P2 (5585-5676)', 67 'miR-26-P1 (5679-5762)', 68 'miR-26-P2 (5765-5847)', 69 'miR-26-P3 (5850-5933)', 70 'miR-27-P1 (5936-6024)', 71 'miR-27-P2 (6027-6112)', 72 'miR-27-P3 (6115-6198)', 73 'miR-29-P1 (6196-6278)', 74 'miR-29-P2 (6281-6364)', 75 'miR-29-P3 (6367-6450)', 76 'miR-29-P4 (6453-6532)', 77 'miR-30-P1 (6535-6607)', 78 'miR-30-P2 (6610-6683)', 79

'miR-30-P3 (6686-6762)', 80 'miR-30-P4 (6765-6837)', 81  
'miR-30-P5 (6840-6914)', 82 'miR-30-P6 (6917-6988)', 83  
'miR-31 (6991-7078)', 84 'miR-32 (7079-7146)', 85 'miR-  
33-P1 (7149-7235)', 86 'miR-33-P2 (7238-7324)', 87  
'miR-34-P1 (7327-7407)', 88 'miR-34-P2a (7410-7488)', 89  
'miR-34-P2b (7491-7564)', 90 'miR-34-P3a (7567-7643)',  
91 'miR-34-P3b (7646-7723)', 92 'miR-34-P3c (7726-  
7810)', 93 'miR-34-P3d (7813-7890)', 94 'miR-92-P1  
(7893-7968)', 95 'miR-92-P2 (7971-8049)', 96 'miR-92-P3  
(8052-8130)', 97 'miR-92-P4 (8133-8213)', 98 'miR-96-  
P1 (8216-8306)', 99 'miR-96-P2 (8309-8395)', 100 'miR-  
96-P3 (8398-8485)', 101 'miR-101-P1 (8488-8561)', 102  
'miR-101-P2 (8564-8642)', 103 'miR-103-P1 (8645-8723)',  
104 'miR-103-P2 (8726-8802)', 105 'miR-103-P3 (8805-  
8883)', 106 'miR-122 (8886-8970)', 107 'miR-124-P1  
(8973-9055)', 108 'miR-124-P2 (9058-9149)', 109 'miR-  
124-P3 (9152-9242)', 110 'miR-124-P4 (9245-9335)', 111  
'miR-126 (9338-9422)', 112 'miR-128-P1 (9425-9506)',  
113 'miR-128-P2 (9509-9590)', 114 'miR-129-P1 (9593-  
9681)', 115 'miR-129-P2 (9684-9774)', 116 'miR-130-P1  
(9777-9863)', 117 'miR-130-P2 (9866-9949)', 118 'miR-  
130-P3 (9952-10039)', 119 'miR-130-P4 (10042-10124)',  
120 'miR-130-P5 (10127-10209)', 121 'miR-130-P6 (10212-  
10295)', 122 'miR-132-P1 (10222-10309)', 123 'miR-132-  
P2 (10391-10485)', 124 'miR-133-P1 (10488-10572)', 125  
'miR-133-P2 (10575-10659)', 126 'miR-133-P3 (10662-  
10747)', 127 'miR-133-P4 (10750-10835)', 128 'miR-135-  
P1 (10838-10926)', 129 'miR-135-P2 (10929-11017)', 130  
'miR-135-P3 (11020-11110)', 131 'miR-137-P1 (11113-  
11213)', 132 'miR-137-P2 (11216-11316)', 133 'miR-138-  
P1 (11319-11405)', 134 'miR-138-P2 (11408-11499)', 135  
'miR-139 (11502-11587)', 136 'miR-140 (11590-11690)',  
137 'miR-142 (11693-11778)', 138 'miR-143 (11781-11865)',  
139 'miR-144 (11868-11950)', 140 'miR-145 (11953-12036)',  
141 'miR-146-P1 (12039-12125)', 142 'miR-146-P2  
(12128-12214)', 143 'miR-146-P3 (12217-12303)', 144  
'miR-147 (12306-12384)', 145 'miR-148-P1 (12387-12467)',  
146 'miR-148-P2 (12470-12553)', 147 'miR-148-P3 (12556-  
12636)', 148 'miR-150 (12639-12727)', 149 'miR-153-P1  
(12730-12821)', 150 'miR-153-P2 (12824-12912)', 151  
'miR-155-P1 (12915-13002)', 152 'miR-155-P2 (13005-  
13083)', 153 'miR-181-P1 (13086-13173)', 154 'miR-181-  
P2 (13176-13257)', 155 'miR-181-P3 (13260-13353)', 156  
'miR-181-P4 (13356-13437)', 157 'miR-181-P5 (13440-  
13525)', 158 'miR-181-P6 (13528-13614)', 159 'miR-184  
(13617-13700)', 160 'miR-187 (13703-13787)', 161 'miR-  
190-P1 (13790-13873)', 162 'miR-190-P2 (13876-13963)',

163 'miR-191 (13966-14052)', 164 'miR-192-P1 (14055-14144)', 165 'miR-192-P2 (14147-14232)', 166 'miR-193-P1 (14235-14322)', 167 'miR-193-P2 (14325-14401)', 168 'miR-193-P3 (14404-14487)', 169 'miR-193-P4 (14490-14566)', 170 'miR-194-P1 (14569-14653)', 171 'miR-194-P2 (14656-14740)', 172 'miR-196-P1 (14743-14830)', 173 'miR-196-P2 (14833-14919)', 174 'miR-196-P3 (14922-15010)', 175 'miR-199-P1 (15013-15101)', 176 'miR-199-P2 (15104-15190)', 177 'miR-199-P3 (15193-15279)', 178 'miR-202 (15282-15368)', 179 'miR-203 (15371-15458)', 180 'miR-204-P1 (15461-15546)', 181 'miR-204-P2 (15549-15633)', 182 'miR-204-P3 (15636-15721)', 183 'miR-205-P1 (15724-15803)', 184 'miR-205-P2 (15806-15885)', 185 'miR-208-P1 (15888-15971)', 186 'miR-208-P2 (15974-16056)', 187 'miR-210 (16059-16147)', 188 'miR-214 (16150-16241)', 189 'miR-216-P1 (16244-16334)', 190 'miR-216-P2 (16337-16424)', 191 'miR-217 (16427-16509)', 192 'miR-218-P1 (16512-16603)', 193 'miR-218-P2 (16606-16697)', 194 'miR-219-P1 (16700-16791)', 195 'miR-219-P2 (16794-16883)', 196 'miR-221-P1 (16886-16969)', 197 'miR-221-P2 (16972-17061)', 198 'miR-221-P3 (17064-17155)', 199 'miR-223-P1 (17158-17248)', 200 'miR-223-P2 (17251-17349)', 201 'miR-338-P1 (17352-17440)', 202 'miR-338-P2 (17443-17525)', 203 'miR-363 (17528-17620)', 204 'miR-367 (17623-17691)', 205 'miR-375 (17694-17787)', 206 'miR-383 (17790-17859)', 207 'miR-425 (17862-17950)', 208 'miR-430-P1 (17953-18022)', 209 'miR-430-P2 (18025-18099)', 210 'miR-430-P3 (18102-18169)', 211 'miR-430-P4 (18172-18243)', 212 'miR-451 (18246-18317)', 213 'miR-454-P1 (18320-18406)', 214 'miR-454-P2 (18409-18501)', 215 'miR-455 (18504-18587)', 216 'miR-456 (18590-18669)', 217 'miR-458 (18672-18755)', 218 'miR-459 (18755-18842)', 219 'miR-460-P1 (18845-18928)', 220 'miR-460-P2 (18931-19014)', 221 'miR-489 (19017-19102)', 222 'miR-499 (19105-19188)', 223 'miR-551-P1 (19191-19270)', 224 'miR-551-P2 (19273-19352)', 225 'miR-726 (19355-19440)', 226 'miR-737 (19443-19530)', 227 'miR-875 (19533-19611)', 228 'miR-1306 (19614-19696)', 229 'miR-1329 (19678-19768)', 230 'miR-1388 (19792-19879)', 231 'miR-1662 (19882-19960)', 232 'miR-1788 (19962-20049)', 233 'miR-1805 (20052-20140)', 234 'miR-2184 (20143-20221)', 235 'miR-2188 (2022-20306)', 236 'miR-2970 (20310-20387)', 237 'miR-3064 (20390-20458)', 238 'miR-3618 (20461-20539)'

;

MATRIX





11100111111110112112111111100001101111001111001111101111011  
11111110011111110111110121111211111011112111101002111111010  
11

Xtr

011001111111001111110111100111111011111110111011111101111  
111111111111111111111110111101110111111111111111101111011  
1111111101110101111111010110111101111001101111001111011110  
1111011101110111011101011111110001011101111111100110111111  
11

Lch

101111110111111111111011110111111111111111110111011111110110  
1111111111111111111110111111111011111111111111111111111111  
111111101111111111111111111110111101111111111110111111111111  
111111111111111111111111111010000101111110111111011111010111  
11

'LCA-T'

111111111111111111111111111111111111111111111111111111111111  
111111111111111111111111111111111111111111111111111111111111  
111111111111111111111111111111111111111111111111111111111111  
111111111111111111111111111111111111111111111111111111111111  
11

;

END;



---

---

```
> Gga
-----TTCTGATCACCTCGGACGTTGCTTTTGGTGACAACCCGGAG-CAAAGCAACGAGAGGTCCGG-TCTGAA-----
> chicken
-----TGATCACCTCGGACGTTGCTTTT-----AAGCAACGAGAGGTCCGG-TCTGA-----
> Tgu
CTCCTCTTCTGACCACCTCGGACATTGCTTTTGTGAGCCTTGAGAG-CGAAGCAACGCGAGGGCCGG-TCTGAAACCCC
> Columba
CTGCACTTCTGACCACCTCAGCCGTTGCTTTTGTGAGCCTCGAGAG-CGAAGCAACGAGAGGCTGG-TCTGAAACCCC
> pigeon
-----TGACCACCTCAGCCGTTGCTTTTGG-----GAAGCAACGAGAGGCTGG-TCTGA-----
> Chrysemys
-----TTCTGATCACCTCAGTTGTTGCTTTTGTGAGGATCTCAAGAGAAAGCAATGAGAGGGTGGGTCTGAAACCCA
> Chelonia
-----TTCTGATCACCTCAGTTGTTGCTTTTGTGAGCATCTCAAGGGAAAGCAATGAGAGGGTGGGTCTGAAACCC-
> Pelodiscus
CTCCTTTTCTGATCACCTCAGTTGTTGCTTTTGTGAACATCTC--AGGAAAGCAACGAGAGGGTAGGTCTGAAACCCC
> Apalone
CTCCTTTTCTGATCACCTCAGTTGTTGCTTTTGTGAACATCTCATAGGAAAGCAATGAGAGGGTAGGTCTGAAACCCC
> Alligator
-----CTTCTGATCACCTCAGTTGTTGCTTTTGTGAGCATTTTCATGGGAAAGCAACAAGAGGGCAGGTCTGAAACCC-
> A sinensis
-----CTTCTGATCACCTCAGTTGTTGCTTTTGTGAGCATTTTCATGGGAAAGCAACAAGAGGGCGGGTCTGAAACCC-
```

---

---

```
> Gga
---TGAAGCACCATGTTGGGCTGCATCAGTCATGCCATGTTATGAAACCTAACGCGATGTGACTGATGCAGGCTGACGTGATGTGTCA----
> chicken
-----TGGGCTGCATCAGTCATGCCATG-----GCGATGTGACTGATGCAGGCTG-----
> zebrafinch
AGCTGATGCACCATGTTGGGCTGCATCAGTCATGCCATGTTATGAAACCTAACGCGATGTGACTGATGCAGCTTGACATGAAGTGTACAAA-
> Columba
-----TGCACCGTGTGGGCTGCATCAGTCATGCCATGTTATGAAACCTAACACGATGTGACTGATGCAGGCTGACGTGATGTGT-----
> pigeon
-----CGATGTGACTGATGCAGGCTGAC-----
> Ami
-----TGCACCATGTTGGGCTGCCTCAGTCATGCCATGTTATGAAACCTAATGCAATGTGACTGATGCAGGCTGACGTGATGTGT-----
> alligator
-----TGGGCTGCCTCAGTCATGCCAT-----
> A sinensis
---TGATGCACCATGTTGGGCTGCCTCAGTCATGCCATGTTATGAAACCTAATCCAATGTGACTGATGCAGGCTGACGTGATGTGTCA----
> Chrysemys
-----TGCACCATGTTGGGCTGCATCAGTCATGCCATGTTATGAAACCTAACACGATGTGACTGATGCAGGCTGACATGA-----
> Chelonia
-----GCACCATGTTGGGCTGCATCAGTCATGCCATGTTATGAAACCTAACACGATGTGACTGATGCAGGCTGACAGGA-----
> Pelodiscus
---TGATGCACCATGTTGGGTTGCATCAGTCATGCCAAGTTATGAAACCTAACACAAAAGTGACTGATGCAGGTTGACATGACATGTCACAA-
> Apalone
---TGATGCACCATGTTGGGTTGCATCAGTCATGCCATGTTATGAAACCTAACACAAAAGTGACTGATGCAGGTTGACATGACATGTCACAA-
```

---

---

```
> Gga
--CTTC-ACCTGCGGAGCCTGCTGAGAGTGAAATTGATAAAGTGCGGCACCAGCTCAGACAATTTCACTCACAGCAGGCAC TTGCAGGTGAAGCA
> Tgu
TGCTTC-ACCTGCGGAGCCTGCTGAGAGTGAAATTGATAAAGGACAGCACCAGCCCAGGCAATTTCACTCACAGCGGGCAC TTGCAGGTGAAGCA
> zebrafinch
-----AGCCTGCTGAGAGTGAAATTGA-----AATTTCACTCACAGCGGGCAC TT-----
> Columba
TGCTTC-ACCTGCGGAGCCTGCTGGGAGCGAAATTGAGAAAGGACAGCGCCAGCCCAGGCAATTTCACTCACAGCGGGCAC TTGCAGGTGAAGCA
> duck
-----AGCCTGCTGAGAGTGAAATTGA-----
> Ami
TGCTTT-ACCTGTGGCTCCTACTGTGAGTGAAATTGAGTAGGATCAG-GTGATCCTAGTCAATTTCACTCGCAGCAGGTTCTG-GGGATAAAGCC
> A sinensis
TGCTTT-ACCTGTGGCTCCTACTGTGAGTGAAATTGAGTAGGATCAG-GTGATCCTAGTCAATTTCACTCACAGCAGGTTCTG-GGGATAAAGCC
> Chrysemys
----CT-ACAGCAG-ATCCTGTTGAGAGTAAACTAACAAGGATCATGCA-ATCCCAGGCAATTTCACTCACAGCAGGCATTG-TAAGTAAAGCA
> Chelonia
CGCTTT-ATCCCCAGCACCTGCTGAGAGTGAAATTGAGTAGGATCAG-ATGATCCTAGTCAATTTCACTCACAGCAGGAGCCA-CAGGTAAAGGG
> Pelodiscus
AATGATTCATCCTGATGCCTGCTGGGAGTGAAATTGAT-AAGTATAGCAGGAACCTACTCAATTTCAATTCACAGCAGGCAC TT-CAGGTAAAG--
> Apalone
AATGATTCATCCTGATGCCTGCTGGGAGTGAAATTGAT-AAGTATAGCAGGAACCTACTCAATTTCAATTCACAGCAGGCAC TT-CAGGTAAAG--
```

---

>Gallus-mir-9-3\_pre  
AGGGATGTTTCTGTCTTTGGTTATCTAGCTGTATGAGTGTGTGGAGCCATCATAAAGCTAGATAACCGAAAGTAGAAATGACTTC

>Gallus-mir-9-3-5p  
TCTTTGGTTATCTAGCTGTATGA

>Gallus-mir-19b-2\_pre  
GCTGCTCACAGTCAGTTTTGCAGGTTTGCATCCCAGCTTGCTAAAATTGCTGTGCAAATCCATGCAAAACTGACTGTGGTGGT

>Gallus-mir-19b-2-3p  
TGTGCAAATCCATGCAAAACTGA

>Gallus-mir-26a-2\_pre  
GAGGCTGGCGCTGGGTTCAAGTAATCCAGGATAGGCTGTGGTCTG-GCAGTCAGCCTGTTCTAGGTTACTTGGCTCCGGAGCCCGCC

>Gallus-mir-26a-2-5p  
TTCAAGTAATCCAGGATAGGCT

>Gallus-mir-33-2\_pre  
CGGCCCTCGCGGGGTGCATTGTAGTTGCATTGCATGTGTC-AGACTGGGAGTGCAATGCCCTGCCATGCAGCCCGGGGGTCCC

>Gallus-mir-33-2-5p  
GTGCATTGTAGTTGCATTGCAT

>Gallus-mir-92a-2\_pre  
GTTCTCCGTGGGTGGGGATTTGTTGCATTACTTGTAGCTGTGTGTAGAGTATTGCACTTGTCCC GGCTGTGGAGGAAAG

>Gallus-mir-92a-2-3p  
TATTGCACTTGTCCC GGCTG

>Gallus-mir-96\_pre  
GGCCCGCTTTGGCACTAGCACATTTTTGCTTTGCTTTATGTGTTTTGAGCAATTATGTGTAGTGCCAATATGGGAGAAGGCGGAGA

>Gallus-mir-96-5p (predicted)  
TTGGCACTAGCACATTTTTGCT

>Gallus-mir-125b-1\_pre  
GTTGCGCCCTCTCAATCCCTGAGACCCTAACTTGTGATGTTTAGCTTTTAAATCCACGGGTTAGGCTCTTGGGAGCTGTGAGTTGTGCTTT

>Gallus-mir-125b-1-5p  
TCCCTGAGACCCTAACTTGTGA

>Gallus-mir-145\_pre  
CGTGCTCTCAGGGTCCAGTTTTCCAGGAATCCCTTAGGCGCTACGTTGGGGATTCTTGAAATACTGTTCTTGGGGCCACGGCT

>Gallus-mir-145-5p (predicted)  
GTCCAGTTTTCCAGGAATCCCTT

>Gallus-mir-153b\_pre  
TTAGCGGTTGCCAGTGTCATTTTGTGATGTTGCAGCTAGTAATATGAGCCCAGTTGCATAGTCACAAAAGTGATCATTTGGAAACTGTGAC

>Gallus-mir-153b-3p (predicted)  
TTGCATAGTCACAAAAGTGATCAT

>Gallus-mir-182\_pre  
GGCTGCTTTTGGCAATGGTAGAACTCACACTGGTGCCTCGCAGGATCCGGTGGTTCTAGACTTGCCAACTACAGCCCCGGG

>Gallus-mir-182-5p (predicted)  
TTTGGCAATGGTAGAACTCACACTG

>Gallus-mir-190b\_pre  
CCCTGCCTCTGTCTGATATGTTTGATATTAGGTTGTTGATTGGAAACCAACTAAATATCAAACATATTCTTACAGCGGCAGGGC

>Gallus-mir-190b-5p (predicted)  
TGATATGTTTGATATTAGGTTG

>Gallus-mir-203b\_pre  
CGGGCCTCGCTGGTCAAGTGGTCTTAAACATTTTACAATTTATGATAGAGAAGTGTGAACTGTTAAGAACCCTGCACCAAGGAGGCTGAGG

>Gallus-mir-203b-3p  
TTGAACTGTTAAGAACCACTGC

>Gallus-mir-210\_pre  
CAGGAGCAGGTGAGCCACTGACTAACGCACATTGTGCTCTCGGGCGACTCCACTGTGCGTGTGACAGCGGCTAACCTGCTCCTCGGAC  
>Gallus-mir-210-3p (predicted)  
CTGTGCGTGTGACAGCGGCTAA

>Gallus-mir-338\_pre  
GCTCCTCCTGCCCAACAATATCCTGGTGCTGAGTGAGTTGCACACAGAGACTCCAGCATCAGTGATTTTGTGAGGAAGGGGAGC  
>Gallus-mir-338-3p (predicted)  
TCCAGCATCAGTGATTTTGTGGA

>Gallus-mir-363\_pre  
GTAAGCTTTGTTTTGCTGTTGTCGGGTGGATCACGATGCAATTTTGTATTAGTTTAGTAGGAGAAAAATTGCACGGTATCCATCTGTAAACCGCAAG  
>Gallus-mir-363-3p (predicted)  
AATTGCACGGTATCCATCTGTAA

>Gallus-mir-1388\_pre  
GCGAGGGGCACCTCGAGGACTGTCTAACCTGAGAATGGTGAAACATGAGGGTCAATCTCAGGTTTCGTTCAGCCCATGAGATGCCTTCTC  
>Gallus-mir-1388-3p (predicted)  
ATCTCAGGTTTCGTTCAGCCCATG

---

>Anolis-let-7a-2\_pre  
GCATCCAGGTTGAGGTAGTAGGTTGTATGGTTTAGAATTACACCAAGGGAGATAACTGTACAACCTCCTAGCTTTCCCTTGGGTCTTGCACA

>Anolis-let-7a-2-5p  
TGAGGTAGTAGGTTGTATGGTT

>Anolis-let-7-new-3p  
CTGTACAACCTCCTAGCTTTCC

>Anolis-let-7a-3\_pre  
GGGTGAGGTAGTAGGTTGTATAGTTTTAGGGTCTGCCCTGCCTGTACATAACTATAACAATCTACTGTCTTTCCCT

>Anolis-let-7a-3-5p  
TGAGGTAGTAGGTTGTATAGTT

>Anllios-let-7a-3-3p  
CTATACAATCTACTGTCTTTCC

>Anolis-let-7a-4\_pre  
AGGTGAGGTAGTAGGTTGTATAGTTTTGTGGGAGGGATTACATCCCATTTTCAGGTGATAACTATAACAGTCTATTGCCTTCCTTA

>Anolis-let-7a-4-5p  
TGAGGTAGTAGGTTGTATAGTT

>Anolis-let-7a-4-3p  
CTATAACAGTCTATTGCCTTCCT

>Anolis-mir-19b-2\_pre  
TACCACCACAGTCAGTTTTGCATGGATTTGCACAGCGACGGACAGCAAGCTGGGATGCAAACCTGCAAAACGGACTGTAGATCA

>Anolis-mir-19b-2-3p (predicted)  
GATGCAAACCTGCAAAACGGAC

>Anolis-miR-26-3\_pre  
AAGGCTTCAGCCTGGTTCAAGTAATCCAGGATAGGCTGTTACCAGGCAGTACGGCCTATTCTTGATTACTTGTTCAGGAGGCGGCC

>Anolis-mir-26-3-5p  
TTCAAGTAATCCAGGATAGGCT

>Anolis-mir-26-3-3p  
GGCCTATTCTTGATTACTTGT

>Anolis-mir-30c-2\_pre  
TAGCAGCGCATGTAAACATCCTACACTCTCAGCTGTGAATTTGTGGTGGCTGGGAGAAGGTTGTTTACACCTTCT

>Anolis-mir-30c-2-5p  
TGTAACATCCTACACTCTCAGC

>Anolis-mir-30c-2-3p  
CTGGGAGAAGGTTGTTTACAC

>Anolis-mir-103-2\_pre  
AGCTTGGTGCTTTTCAGCTTCTTTACAGTGCTGCCTTGTGCAACCATGTCAAGCAGCATTGTACAGGGCTATGAAAGAAC

>Anolis-mir-103-2-3p  
AGCAGCATTGTACAGGGCTATGA

>Anolis-mir-106\_pre  
TCGGGGTGCAAAAGTGCTTATAGTGCAGGTAGTGTGTTGGCATCTACTGCAGTGTGGCACTTCCGTGCCACGATG

>Anolis-mir-106-5p  
AAAAGTGCTTATAGTGCAGGTAG

>Anolis-mir-106-3p  
ACTGCAGTGTGGCACTTCC

>Anolis-mir-133a-3\_pre  
TGTGTCCCTAGGGCTGGTAAAAAGGAACCAGATCGACTGGCAACTGGATTTGGTCCCCTTCAACCAGCTGTGGTGGC

>Anolis-mir-133a-3p  
TTTGGTCCCCTTCAACCAGCTG

---

>Anolis-mir-133b\_pre  
ACTTGAGTCCTGCTCTGGCTGGTCAAAGGGAACACGGCTGTCTTCCCTTGAAGGTTTGGTCCCCTTTAACCAGCTACAGCAGTCCTGATATCA  
>Anolis-mir-133b-3p  
TTTGGTCCCCTTTAACCAGCTA  
>Anolis-mir-133b-5p  
GCTGGTCAAAGGGAACACGGC

>Anolis-mir-155b\_pre  
CAGAAGGTGTTTATGCTCCTTACGTCGGGAGTTTGAGATCTGATGCAACTCCTCTCCTGGTAGCATTGACTCTTACTGA  
>Anolis-mir-155b-5p (predicted)  
TTTATGCTCCTTACGTCGGGAG

>Anolis-mir-181c\_pre  
AAAGTCACAATCAACATTTCATTCTGTTCGGTGGGTGTGATGCTGGAGGAGAACCCTCACTGATCAGTGAATGCAACTGTGGCTGGA  
>Anolis-mir-181c-5p  
AACATTTCATTCTGTTCGGTGGGT

>Anolis-mir-222b\_pre  
GGATGCCAATGGGCTGCTCAGTAGTCGGTGTAGAATCTGTCTGATGATACCCACAGCTACATCTGATTACTGGGTTTCCCTGTGGCATCAG  
>Anolis-mir-222b-5p  
TGCTCAGTAGTCGGTGTAGAATC  
>Anolis-mir-222b-3p  
AGCTACATCTGATTACTGGGTTTC

>Anolis-mir-302a\_pre  
CCACTACTTTAATATGAAAGTACTTGTTTTTGTTCCTTTTAAAAAGTGCTTTCATATTTTAGTGATGG  
>Anolis-mir-302a-3p (predicted)  
AAGTGCTTTCATATTTTAGTGA

>Anolis-mir-737\_pre  
GCTACTCTGCTGTTGTTTTTTTAGGTTTTGATTTTTATGCCATCCTCATGCGAAAATCAAAACCTAAAGAAAATGCTGCAAAGATAGAT  
>Anolis-mir-737-3p  
AATCAAAACCTAAAGAAAATG  
>Anolis-mir-737-5p  
GTTTTTTTTAGGTTTTGATTTTT

>Anolis-mir-1641\_pre  
CAGGGCTTTTCCCTG-GGATTAATGACAGTCTGGGGGCATCATCTCCTCCCAGTTAGTTATTAATCCTCAGGAAACACTCAGTGCCTT  
>Anolis-mir-1641-5p (predicted)  
TGGGATTAATGACAGTCTGGGG

>Aca-novel-1\_pre  
TCTCTGGGTTACTGTGGGTTTTCCAGTCTGTATGGCCATGTTCCAGAAGCATACAGCCTGGAAAACCTTGCAGCAACCCAGTGG  
>Aca-novel-1-3p  
TACAGCCTGGAAAACCTTGCAGC  
>Aca-novel-1-5p  
TGTGGGTTTTCCAGTCTGTATG

>Aca-novel-2\_pre  
TGAAATAAAGTGACATGGACAATTTTGGTTTTGATGTTTAATGAGTATCAAAACTAGGATTGTCTATGCCATTGTGTTTTTC  
>Aca-novel-2-3p  
TCAAAACTAGGATTGTCTATGC  
>Aca-novel-2-5p  
ATGGACAATTTTGGTTTTGATG

>Aca-novel-3\_pre  
GCCCAGAATGGGGCATCCACACAACCAGCAAGAAGGAAAATAAGATTAATCCCTTTCTTCTTGCTGTTTTGTGCAGGTGCCTCATCCTGACA

---

>Aca-novel-3-5p  
CCACACAACCAGCAAGAAGGAA  
>Aca-novel-3-3p  
TCTTCTTGCTGTTTGTGCAGGT

>Aca-novel-4\_pre  
TGTTTCCCCAGCCTTCTTTTCATCTCTGAAATGCATATGTTTTAGCACCATTTGTATTTTCAGAGATGGAGGGCCGAAGAAACGCAT  
>Aca-novel-4-5p  
TTTCATCTCTGAAATGCATATG  
>Aca-novel-4-3p  
TTTGTATTTTCAGAGATGGAGGG

>Aca-novel-5\_pre  
CTCTACAGTCCTTCTCAAAATGGAAACAGGAAATAGAGTCAGATCACTTCTTGTGTCATTTTGAGATGAACTTTATAGAA  
>Aca-novel-5-3p  
TCTTGTGTCATTTTGAGATGA  
>Aca-novel-5-5p  
TTCTCAAAATGGAAACAGGAA

>Aca-novel-6\_pre  
TCCCAGGTTCTTCTACACTGCCATATAATCCAGATTATCTGTTTTGATTTTATATGGCAATGTAGAGGAAGGTTTCTTTT  
>Aca-novel-6-3p  
ATTTTATATGGCAATGTAGAGG  
>Aca-novel-6-5p  
TTCTACACTGCCATATAATCCA

>Aca-novel-7\_pre  
CCCTTCTACACTGGCCCAAACCTTTATGAAATCAGTATTTAAAGCCCCAATTTTCATGAGAATTTGGTGCTCGTGCAGGCGGC  
>Aca-novel-7-3p  
TTTCATGAGAATTTGGTGCTCG  
>Aca-novel-7-5p  
TGGCCCAAACCTTTATGAAATC

READ ADJUSTMENTS:

>Aca-miR-5407-5p  
TTTTCGGATTTTTCAGTCACAGTTT  
>Aca-miR-5407-3p  
TCTGTGTGGGATAATCCGAAAGA

>Aca-miR-5417-3p  
TCATCCCAGCCCCTTTTCTCCC  
>Aca-miR-5417-5p  
GAGAGAAGGCGTGGGAAGGAGC

>Aca-miR-5426-5p  
CACTCTAAGTCTACTTCCACAG  
>Aca-mir-5426-3p  
GAGGAAGTAAACTTGGACTACT



---

>Xenopus-mir-26-3\_pre  
GTGGCCCGGTTCAAGTAATCCAGGATAGGCTGTTTACATTCTGCGTGGCCTATTCTTGATTACTTGCATTGGGAGGC

>Xenopus-mir-26-3-5p  
TTCAAGTAATCCAGGATAGGC

>Xenopus-mir-124-2\_pre  
GGCCCTTCTCTCCGTGTTTACAGCGGACCTTGATTTAAATGTCCATACAATTAAGGCACGCGGTGAATGCCAAGAGAGGGGCT

>Xenopus-mir-124-3\_pre  
ACGGAGCCCCCTCTGCGTGTTCACAGCGGACCTTGATTTAA-TGTCCATACAATTAAGGCACGCGGTGAATGCCAAGAGAGGGGCTTTATC

>Xenopus-mir-124-3p  
TTAAGGCACGCGGTGAATGCCA

>Xenopus-mir-454\_pre  
AGTGCCCTCAGCCTTAAGGAAGTGACCCTATCAATATTGCTCTGCTTTTTGTGCTCGGAGTAGTAGTGCAATATTGCTTATAGGGTCTTTTCCTTG

>Xenopus-mir-454-3p (predicted)  
TAGTGCAATATTGCTTATAGGGT

>Xenopus-mir-460a\_pre  
TGGCTTTATAGAGCCTGCATTGTACACACTGTGTGTGCACCTCAGACTTGCACAGCGCATACAATGTGGATGCTATATGAGTC

>Xenopus-mir-460a-3p (predicted)  
CACAGCGCATACAATGTGGATGC

>Xenopus-mir-460b\_pre  
TGACTCTACATTGTCCTCATTGTACATGCTGTGTGTATCTATTTCTCTTACACAGCGCATGCAATGTGGATATATTGGATGTC

>Xenopus-mir-460b-3p (predicted)  
CACAGCGCATGCAATGTGGATA

>Xenopus-mir-551a\_pre  
TGACCTTGAAACCAAGAGTGGGTTGGGCCTGTTAGATCACATAGGCGACCCATACTTGGTTTCAAGGGTTAGCAGG

>Xenopus-mir-551a-3p (predicted)  
GGCGACCCATACTTGGTTTCA

>Xenopus-mir-551b\_pre  
TGACCTTAGAAATCAAGCTTGGGTTAGACCTGGTTCTTATACACTGAGGCGACCCATACTTGGTTTCTGAGGCTGAAGTG

>Xenopus-mir-551b-3p (predicted)  
GGCGACCCATACTTGGTTTCT

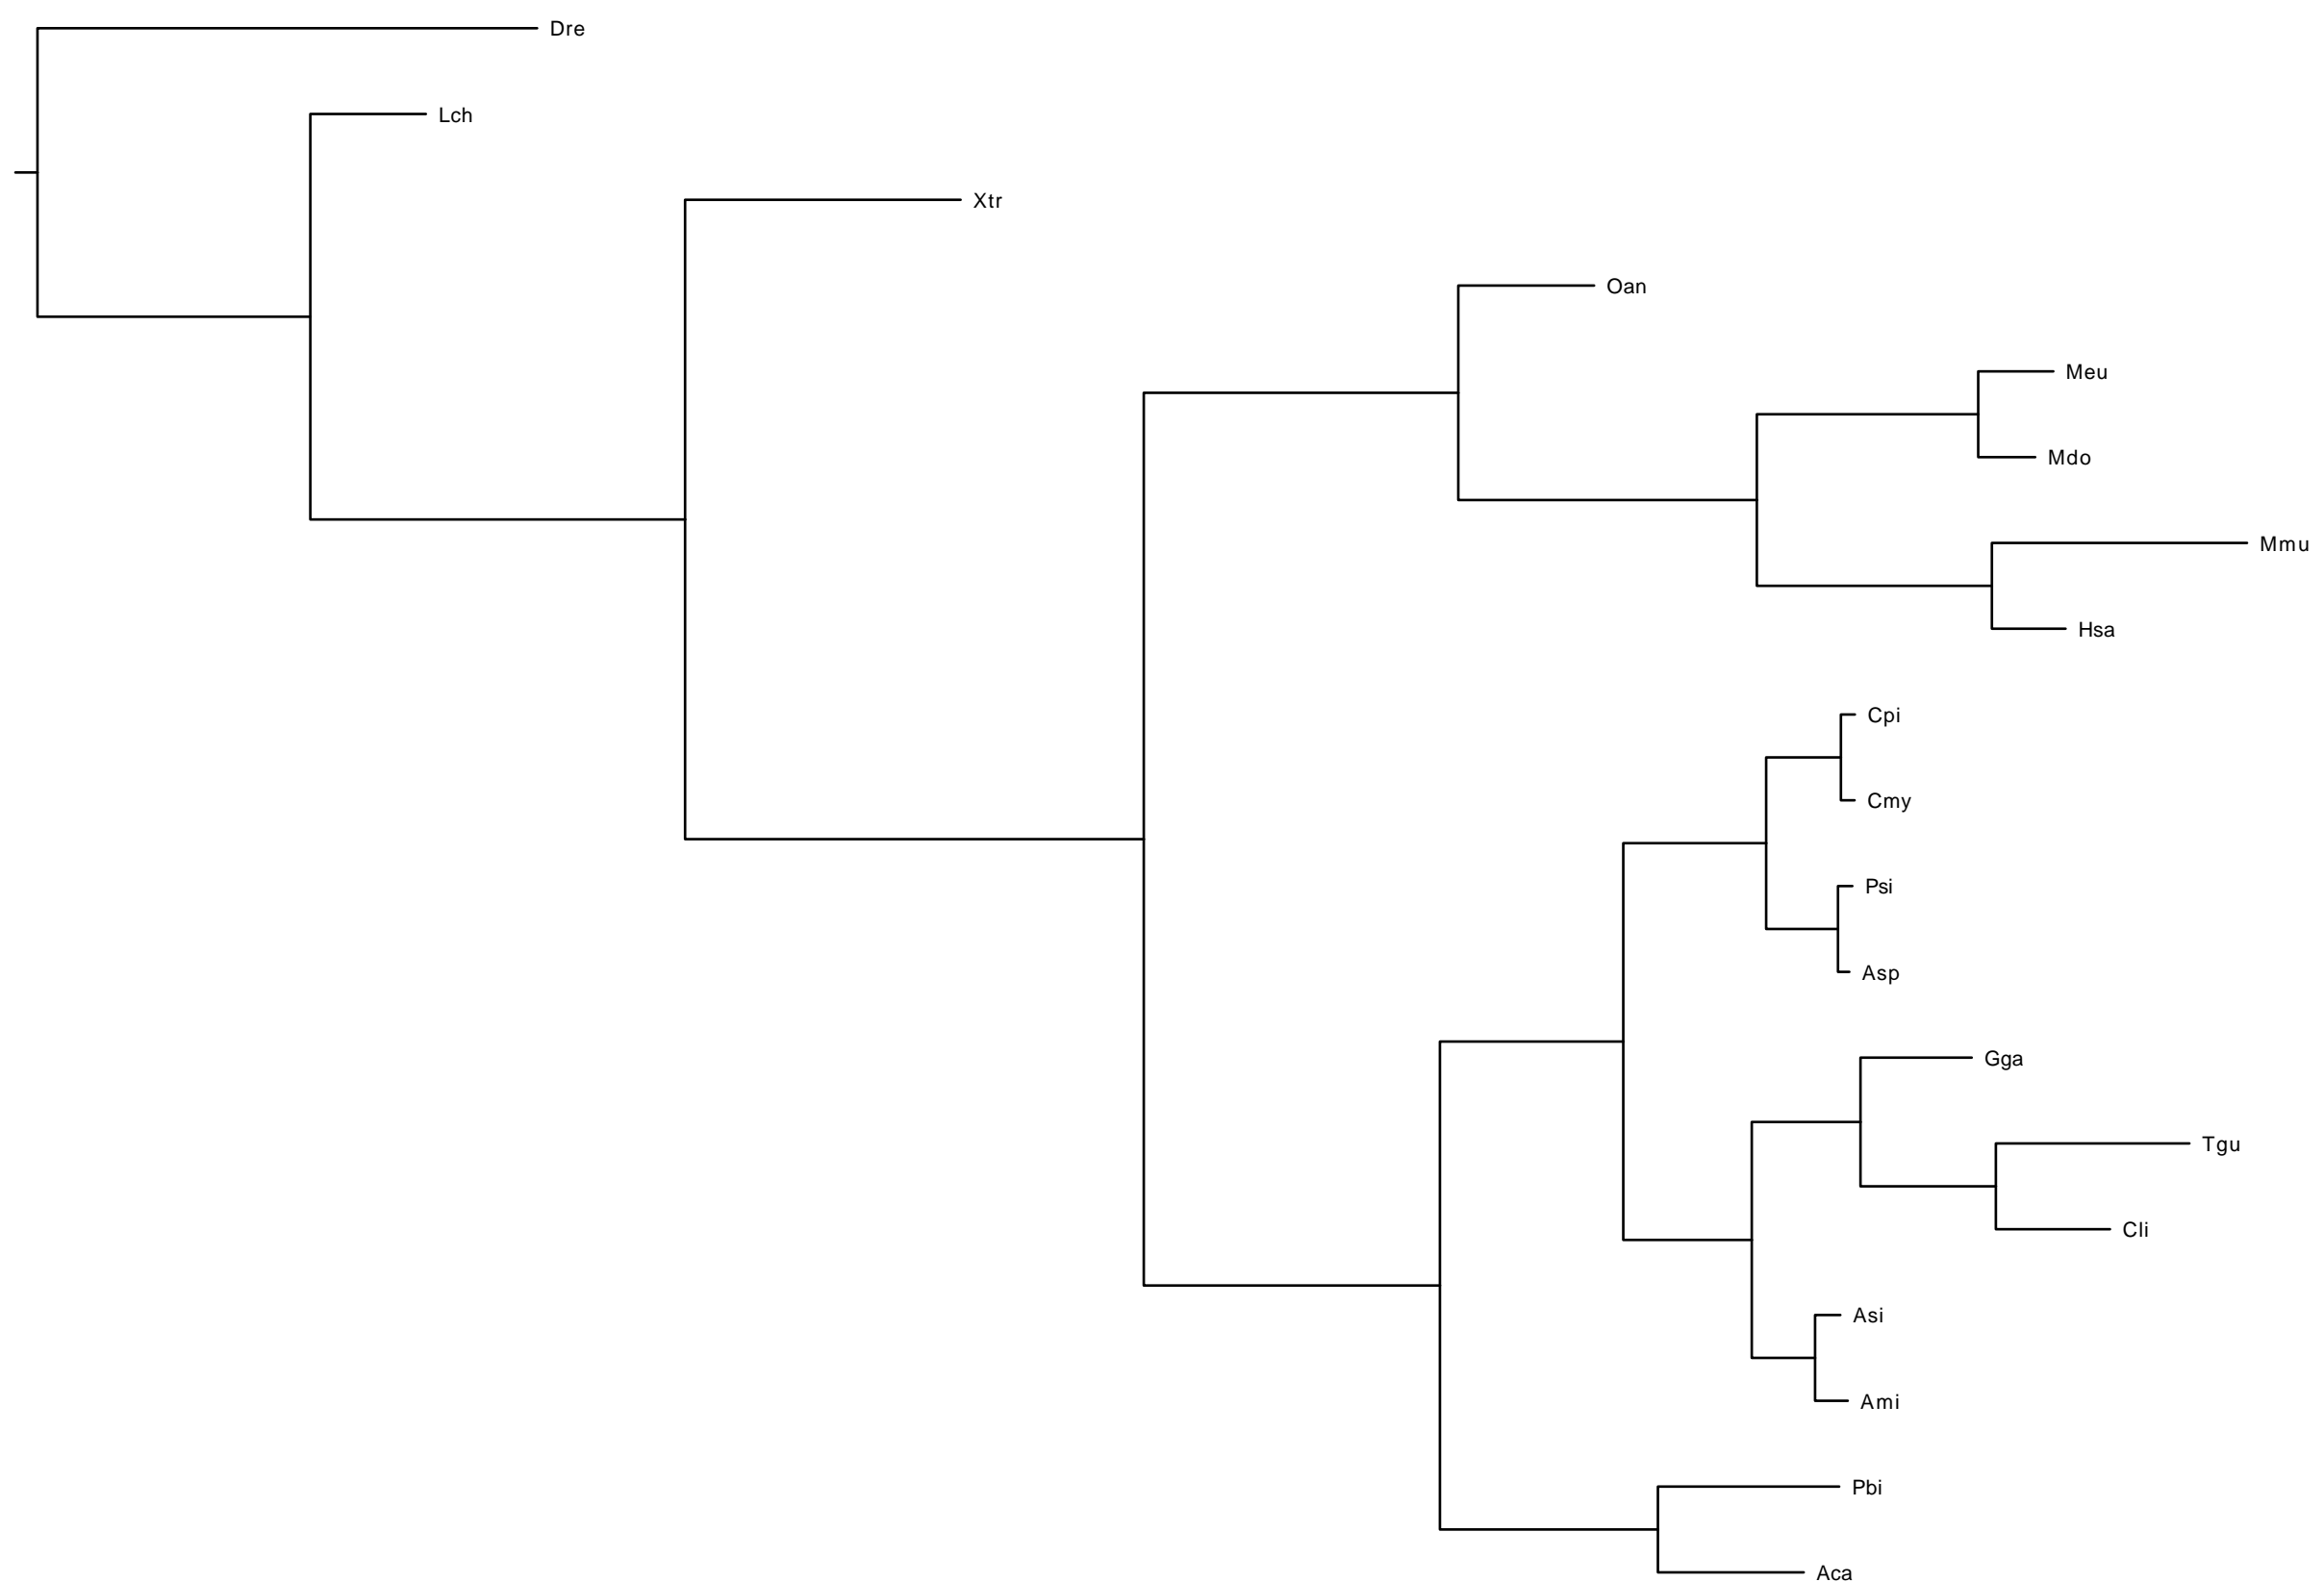

5.0E-4
